# Supplementary material
Source: PubMed Central journal article supplement (PMC6235782)
Supplement: 12079_2017_442_MOESM1_ESM.pdf [file 12079_2017_442_MOESM1_ESM.pdf]

Supplementary Table S1. List of quantified proteins in OKF6/TERT1-Smoke cells  
 Rajagopal *et al.*, 2017. Role of protein kinase N2 (PKN2) in cigarette smoke-mediated oncogenic transformation of oral cells

| Gene Symbol  | Gene ID   | Protein Description                                             | Protein Accession | # Proteins | # Unique Peptides | # Peptides | # PSMs | OKF6/TERT1-Smoke/<br>OKF6/TERT1-Parental<br>(130/126) R1 | OKF6/TERT1-Smoke/<br>OKF6/TERT1-Parental<br>(128/127) R2 | Ratio Standard Errors [%]:<br>OKF6/TERT1-Smoke/<br>OKF6/TERT1-Parental<br>(130/126) R1 | Ratio Standard Errors [%]:<br>OKF6/TERT1-Smoke/<br>OKF6/TERT1-Parental<br>(128/127) R2 | Ratio Variabilities [%]:<br>F13: OKF6/TERT1-<br>Smoke/<br>OKF6/TERT1-Parental<br>(130/126) R1 | Ratio Variabilities [%]:<br>F13: OKF6/TERT1-<br>Smoke/<br>OKF6/TERT1-Parental<br>(128/127) R2 | Ratio Counts: F13:<br>OKF6/TERT1-Smoke/<br>OKF6/TERT1-Parental<br>(130/126) R1 | Ratio Counts: F13:<br>OKF6/TERT1-Smoke/<br>OKF6/TERT1-Parental<br>(128/127) R2 | HPRD ID | Entrez Gene Id | Gene Name                                                                             | Molecular Function                          | Primary Localization  | Molecular Class                               | Biological Process                                                           | Domains           | Plasma Proteome Database |
|--------------|-----------|-----------------------------------------------------------------|-------------------|------------|-------------------|------------|--------|----------------------------------------------------------|----------------------------------------------------------|----------------------------------------------------------------------------------------|----------------------------------------------------------------------------------------|-----------------------------------------------------------------------------------------------|-----------------------------------------------------------------------------------------------|--------------------------------------------------------------------------------|--------------------------------------------------------------------------------|---------|----------------|---------------------------------------------------------------------------------------|---------------------------------------------|-----------------------|-----------------------------------------------|------------------------------------------------------------------------------|-------------------|--------------------------|
| AHSG         | 197       | alpha-2-HS-glycoprotein preproprotein                           | NP_001613.2       | 1          | 2                 | 2          | 3      | 16.16                                                    | 23.57                                                    | 6.5                                                                                    | 6.43                                                                                   | 284                                                                                           | 987.7                                                                                         | 2                                                                              | 2                                                                              | 727     | 197            | alpha-2-HS-glycoprotein                                                               | Defense/immunity protein activity           | Extracellular         | Secreted polypeptide                          | Cell communication;Signal transduction                                       | CYSTATIN;SP       | Yes                      |
| GFPT2        | 9945      | glutamine-fructose-6-phosphate aminotransferase [isomerizing] 2 | NP_005101.1       | 1          | 1                 | 4          | 6      | 12.97                                                    | 9.75                                                     |                                                                                        |                                                                                        |                                                                                               |                                                                                               | 1                                                                              | 1                                                                              | 4842    | 9945           | glutamine-fructose 6-phosphate transaminase 2                                         | Transaminase activity                       | Cytoplasm             | Enzyme: Aminotransferase                      | Metabolism;Energy pathways                                                   | SIS               | Yes                      |
| ORS5AC2      | 81050     | olfactory receptor 5AC2                                         | NP_473447.1       | 1          | 1                 | 1          | 3      | 11.84                                                    | 11.24                                                    |                                                                                        |                                                                                        |                                                                                               |                                                                                               | 1                                                                              | 1                                                                              | 15030   | 81050          | olfactory receptor, family 5, subfamily AC, member 2                                  | G-protein coupled receptor activity         | Integral to membrane  | G protein coupled receptor                    | Cell communication;Signal transduction                                       | TM                | Yes                      |
| WDR78        | 79819     | WD repeat-containing protein 78 isoform 1                       | NP_079039.4       | 2          | 1                 | 1          | 1      | 6.25                                                     | 5.9                                                      |                                                                                        |                                                                                        |                                                                                               |                                                                                               | 1                                                                              | 1                                                                              | 8017    | 79819          | None                                                                                  | Molecular function unknown                  | -                     | Unclassified                                  | Biological process unknown                                                   | CC;WD40           | Yes                      |
| TMOD2        | 29767     | tropomodulin-2 isoform a                                        | NP_055363.1       | 2          | 1                 | 2          | 6      | 5.87                                                     | 6.3                                                      |                                                                                        |                                                                                        |                                                                                               |                                                                                               | 1                                                                              | 1                                                                              | 4237    | 29767          | tropomodulin 2 (neuronal)                                                             | Cytoskeletal protein binding                | Cytoplasm             | Cytoskeletal associated protein               | Cell growth and/or maintenance                                               | CC                | Yes                      |
| RNGTT        | 8732      | mRNA-capping enzyme isoform a                                   | NP_003791.3       | 3          | 2                 | 2          | 7      | 5.11                                                     | 3.25                                                     | 1.01                                                                                   | 0.74                                                                                   | 8.9                                                                                           | 4.2                                                                                           | 3                                                                              | 3                                                                              | 4621    | 8732           | RNA guanylyltransferase and 5'-phosphatase                                            | Catalytic activity                          | Nucleus               | Enzyme: Adenosyltransferase                   | Metabolism;Energy pathways                                                   | DSPC              | Yes                      |
| JRK          | 8629      | jerky protein homolog isoform a                                 | NP_003715.3       | 2          | 1                 | 1          | 1      | 4.72                                                     | 4.09                                                     |                                                                                        |                                                                                        |                                                                                               |                                                                                               | 1                                                                              | 1                                                                              | 4442    | 8629           | jerky homolog (mouse)                                                                 | DNA binding                                 | Nucleus               | DNA binding protein                           | Regulation of nucleobase, nucleoside, nucleotide and nucleic acid metabolism | -                 | No                       |
| LOC100506514 | 100506514 | uncharacterized protein LOC100506514                            | XP_011538667.1    | 1          | 1                 | 1          | 1      | 4.55                                                     | 4.11                                                     |                                                                                        |                                                                                        |                                                                                               |                                                                                               | 1                                                                              | 1                                                                              |         |                |                                                                                       |                                             |                       |                                               |                                                                              |                   |                          |
| CPNE2        | 221184    | copine-2                                                        | NP_689940.3       | 10         | 1                 | 2          | 6      | 3.9                                                      | 6.59                                                     |                                                                                        |                                                                                        |                                                                                               |                                                                                               | 1                                                                              | 1                                                                              | 5015    | 221184         | copine II                                                                             | Transporter activity                        | Cytoplasm             | Transport/cargo protein                       | Transport                                                                    | C2;VWA            | Yes                      |
| PTGS2        | 5743      | prostaglandin G/H synthase 2 precursor                          | NP_000954.1       | 1          | 1                 | 1          | 1      | 3.59                                                     | 4.88                                                     |                                                                                        |                                                                                        |                                                                                               |                                                                                               | 1                                                                              | 1                                                                              | 2599    | 5743           | prostaglandin-endoperoxide synthase 2 (prostaglandin G/H synthase and cyclooxygenase) | Peroxidase activity                         | Cytoplasm             | Enzyme: Synthase                              | Metabolism;Energy pathways                                                   | SP;EGF            | Yes                      |
| SCG3         | 29106     | secretogranin-3 isoform 1 precursor                             | NP_037375.2       | 2          | 1                 | 1          | 2      | 3.44                                                     | 2.31                                                     |                                                                                        |                                                                                        |                                                                                               |                                                                                               | 1                                                                              | 1                                                                              | 11538   | 29106          | secretogranin III                                                                     | Molecular function unknown                  | Secretory granule     | Secreted polypeptide                          | Protein metabolism                                                           | SP                | Yes                      |
| SURF4        | 6836      | surfeit locus protein 4 isoform 1                               | NP_149351.1       | 5          | 4                 | 4          | 27     | 3.28                                                     | 4.03                                                     | 22.56                                                                                  | 18.1                                                                                   | 141.1                                                                                         | 137.9                                                                                         | 2                                                                              | 2                                                                              | 1715    | 6836           | surfeit 4                                                                             | Auxiliary transport protein activity        | Endoplasmic reticulum | Membrane transport protein                    | Transport                                                                    | TM                | Yes                      |
| MAPK12       | 6300      | mitogen-activated protein kinase 12 isoform 1                   | NP_002960.2       | 7          | 1                 | 2          | 4      | 3.16                                                     | 5.57                                                     |                                                                                        |                                                                                        |                                                                                               |                                                                                               | 1                                                                              | 1                                                                              | 3868    | 6300           | mitogen-activated protein kinase 12                                                   | Protein serine/threonine kinase activity    | Cytoplasm             | Serine/threonine kinase                       | Cell communication;Signal transduction                                       | S_T_kinase        | Yes                      |
| CYR61        | 3491      | protein CYR61 precursor                                         | NP_001545.2       | 1          | 10                | 10         | 23     | 3.13                                                     | 3.25                                                     | 2.89                                                                                   | 9.86                                                                                   | 34.9                                                                                          | 179                                                                                           | 14                                                                             | 14                                                                             | 9089    | 3491           | cysteine-rich, angiogenic inducer, 61                                                 | Extracellular matrix structural constituent | Extracellular         | Extracellular matrix protein                  | Cell communication;Signal transduction                                       | SP;IB;VWC;TSP1;CT | Yes                      |
| GSTM2        | 2946      | glutathione S-transferase Mu 2 isoform 1                        | NP_000839.1       | 3          | 1                 | 2          | 3      | 3.12                                                     | 4.98                                                     |                                                                                        |                                                                                        |                                                                                               |                                                                                               | 1                                                                              | 1                                                                              | 710     | 2946           | glutathione S-transferase M2 (muscle)                                                 | Glutathione transferase activity            | Cytoplasm             | Enzyme: Glutathione transferase               | Metabolism;Energy pathways                                                   | -                 | No                       |
| TDO2         | 6999      | tryptophan 2,3-dioxygenase                                      | NP_005642.1       | 1          | 1                 | 1          | 2      | 3.03                                                     | 4.15                                                     | 1.85                                                                                   | 1.46                                                                                   | 7.9                                                                                           | 8.6                                                                                           | 2                                                                              | 2                                                                              | 1847    | 6999           | tryptophan 2,3-dioxygenase                                                            | Catalytic activity                          | Cytoplasm             | Enzyme: Mutase                                | Metabolism;Energy pathways                                                   | CC                | Yes                      |
| MDK          | 4192      | midkine isoform a precursor                                     | NP_002382.1       | 2          | 3                 | 3          | 5      | 2.97                                                     | 3.14                                                     | 0.07                                                                                   | 13                                                                                     | 0.4                                                                                           | 80.6                                                                                          | 3                                                                              | 3                                                                              | 1200    | 4192           | midkine (neurite growth-promoting factor 2)                                           | Cytokine activity                           | Extracellular         | Cytokine                                      | Cell communication;Signal transduction                                       | SP                | Yes                      |
| STAU1        | 6780      | double-stranded RNA-binding protein Staufen homolog 1 isoform c | NP_001032405.1    | 1          | 1                 | 17         | 42     | 2.97                                                     | 2.36                                                     |                                                                                        |                                                                                        |                                                                                               |                                                                                               | 1                                                                              | 1                                                                              | 3422    | 6780           | staufen, RNA binding protein (Drosophila)                                             | RNA binding;Transporter activity            | Endoplasmic reticulum | RNA binding protein;Transporter cargo protein | Protein metabolism                                                           | DSRM              | Yes                      |
| CELA3A       | 10136     | chymotrypsin-like elastase family member 3A preproprotein       | NP_005738.4       | 1          | 1                 | 1          | 1      | 2.89                                                     | 3.26                                                     |                                                                                        |                                                                                        |                                                                                               |                                                                                               | 1                                                                              | 1                                                                              | 6497    | 10136          | elastase 3A, pancreatic (protease E)                                                  | Peptidase activity                          | Extracellular         | Protease                                      | Protein metabolism                                                           | SP;TRYPSIN        | Yes                      |
| ALDH1A1      | 216       | retinal aldehyde dehydrogenase 1                                | NP_000680.2       | 1          | 6                 | 8          | 39     | 2.86                                                     | 2.21                                                     | 3.82                                                                                   | 4.33                                                                                   | 50.4                                                                                          | 43.6                                                                                          | 19                                                                             | 19                                                                             | 1       | 216            | aldehyde dehydrogenase 1 family, member A1                                            | Aldehyde dehydrogenase activity             | -                     | Enzyme: Dehydrogenase                         | Aldehyde metabolism                                                          | A2M               | Yes                      |
| CCDC175      | 729665    | coiled-coil domain-containing protein 175                       | NP_001157871.1    | 1          | 1                 | 1          | 2      | 2.73                                                     | 3.55                                                     |                                                                                        |                                                                                        |                                                                                               |                                                                                               | 1                                                                              | 1                                                                              |         |                |                                                                                       |                                             |                       |                                               |                                                                              |                   |                          |
| DDX53        | 168400    | DEAD box protein 53                                             | NP_874358.2       | 1          | 1                 | 1          | 1      | 2.73                                                     | 3.29                                                     |                                                                                        |                                                                                        |                                                                                               |                                                                                               | 1                                                                              | 1                                                                              | 6466    | 168400         | DEAD (Asp-Glu-Ala-Asp) box polypeptide 53                                             | Molecular function unknown                  | Nucleus               | Unclassified                                  | Regulation of nucleobase, nucleoside, nucleotide and nucleic acid metabolism | KH;DEXDc;HELIC    | No                       |
| RCN3         | 57333     | reticulocalbin-3 precursor                                      | NP_065701.2       | 1          | 8                 | 8          | 19     | 2.64                                                     | 2.2                                                      | 8.62                                                                                   | 6.01                                                                                   | 77.2                                                                                          | 41.3                                                                                          | 9                                                                              | 9                                                                              | 17962   | 57333          | reticulocalbin 3, EF-hand calcium binding domain                                      | Calcium ion binding                         | -                     | Calcium binding protein                       | Biological process unknown                                                   | SP;EF             | Yes                      |
| ICAM1        | 3383      | intercellular adhesion molecule 1 precursor                     | NP_000192.2       | 1          | 15                | 15         | 48     | 2.57                                                     | 2.62                                                     | 5.67                                                                                   | 6.54                                                                                   | 75                                                                                            | 92.4                                                                                          | 21                                                                             | 21                                                                             | 996     | 3383           | intercellular adhesion molecule 1 (CD54), humanrhinovirus receptor                    | Cell adhesion molecule activity             | Plasma membrane       | Adhesion molecule                             | Cell communication;Signal transduction                                       | Ig_LIKE;IG;TM;SP  | Yes                      |
| FOSL1        | 8061      | fos-related antigen 1 isoform 1                                 | NP_005429.1       | 3          | 1                 | 1          | 4      | 2.47                                                     | 2.21                                                     | 25.2                                                                                   | 28.98                                                                                  | 108                                                                                           | 112.9                                                                                         | 2                                                                              | 2                                                                              | 643     | 8061           | FOS-like antigen 1                                                                    | Transcription factor activity               | Nucleus               | Transcription factor                          | Regulation of nucleobase, nucleoside, nucleotide and nucleic acid metabolism | BRLZ;CC           | Yes                      |
| PHRF1        | 57661     | PHD and RING finger domain-containing protein 1 isoform 1       | NP_001273510.1    | 4          | 1                 | 1          | 1      | 2.43                                                     | 2.9                                                      |                                                                                        |                                                                                        |                                                                                               |                                                                                               | 1                                                                              | 1                                                                              | 13870   | 57661          | None                                                                                  | Molecular function unknown                  | -                     | Unclassified                                  | Biological process unknown                                                   | RING              | Yes                      |
| KYNU         | 8942      | kynureninase isoform a                                          | NP_003928.1       | 2          | 14                | 14         | 30     | 2.35                                                     | 3.57                                                     | 5.1                                                                                    | 2.69                                                                                   | 50.8                                                                                          | 39.9                                                                                          | 16                                                                             | 16                                                                             | 8940    | 8942           | kynureninase (L-kynureninase hydrolase)                                               | Hydrolase activity                          | -                     | Enzyme: Hydrolase                             | Metabolism;Energy pathways                                                   | -                 | Yes                      |
| ZNF318       | 24149     | zinc finger protein 318                                         | NP_055160.2       | 1          | 1                 | 1          | 2      | 2.33                                                     | 2.1                                                      |                                                                                        |                                                                                        |                                                                                               |                                                                                               | 1                                                                              | 1                                                                              | 11707   | 24149          | zinc finger protein 318                                                               | Transcription regulator activity            | Nucleus               | Transcription regulatory protein              | Regulation of nucleobase, nucleoside, nucleotide and nucleic acid metabolism | CC;ZNF2           | No                       |

Supplementary Table S1. List of quantified proteins in OKF6/TERT1-Smoke cells  
 Raigopaln *et al.*, 2017. Role of protein kinase N2 (PKN2) in cigarette smoke-mediated oncogenic transformation of oral cells

| Gene Symbol | Gene ID | Protein Description                                        | Protein Accession | # Proteins | # Unique Peptides | # Peptides | # PSMs | OKF6/TERT1-Smoke/<br>OKF6/TERT1-Parental<br>(130/126) R1 | OKF6/TERT1-Smoke/<br>OKF6/TERT1-Parental<br>(128/127) R2 | Ratio Standard Errors [%]:<br>OKF6/TERT1-Smoke/<br>OKF6/TERT1-Parental<br>(130/126) R1 | Ratio Standard Errors [%]:<br>OKF6/TERT1-Smoke/<br>OKF6/TERT1-Parental<br>(128/127) R2 | Ratio Variabilities [%]:<br>F13: OKF6/TERT1-<br>Smoke/<br>OKF6/TERT1-Parental<br>(130/126) R1 | Ratio Variabilities [%]:<br>F13: OKF6/TERT1-<br>Smoke/<br>OKF6/TERT1-Parental<br>(128/127) R2 | Ratio Counts: F13:<br>OKF6/TERT1-Smoke/<br>OKF6/TERT1-Parental<br>(130/126) R1 | Ratio Counts: F13:<br>OKF6/TERT1-Smoke/<br>OKF6/TERT1-Parental<br>(128/127) R2 | HPRD ID | Entrez Gene ID | Gene Name                                                                     | Molecular Function                          | Primary Localization  | Molecular Class                    | Biological Process                                                           | Domains                          | Plasma Proteome Database |
|-------------|---------|------------------------------------------------------------|-------------------|------------|-------------------|------------|--------|----------------------------------------------------------|----------------------------------------------------------|----------------------------------------------------------------------------------------|----------------------------------------------------------------------------------------|-----------------------------------------------------------------------------------------------|-----------------------------------------------------------------------------------------------|--------------------------------------------------------------------------------|--------------------------------------------------------------------------------|---------|----------------|-------------------------------------------------------------------------------|---------------------------------------------|-----------------------|------------------------------------|------------------------------------------------------------------------------|----------------------------------|--------------------------|
| ABCA2       | 20      | ATP-binding cassette sub-family A member 2 isoform b       | NP_997698.1       | 2          | 1                 | 1          | 1      | 2.31                                                     | 2.91                                                     |                                                                                        |                                                                                        |                                                                                               |                                                                                               | 1                                                                              | 1                                                                              | 8967    | 20             | ATP-binding cassette, sub-family A (ABC1), member 2                           | Transporter activity                        | Lysosome              | Transport/cargo protein            | Transport                                                                    | TM;AAA                           | Yes                      |
| AKAP12      | 9590    | A-kinase anchor protein 12 isoform 1                       | NP_005091.2       | 2          | 35                | 35         | 87     | 2.28                                                     | 2.45                                                     | 3.7                                                                                    | 3.51                                                                                   | 59.2                                                                                          | 60.2                                                                                          | 42                                                                             | 42                                                                             | 5263    | 9590           | A kinase (PKKA) anchor protein (gravin) 12                                    | Cytoskeletal anchoring activity             | Cytoplasm;Nucleus     | Anchor protein                     | Cell growth and/or maintenance                                               | PkinA_anch                       | Yes                      |
| CTSL        | 1514    | cathepsin L1 isoform 1 preproprotein                       | NP_001244900.1    | 1          | 1                 | 1          | 1      | 2.24                                                     | 2.14                                                     |                                                                                        |                                                                                        |                                                                                               |                                                                                               | 1                                                                              | 1                                                                              |         |                |                                                                               |                                             |                       |                                    |                                                                              |                                  |                          |
| POU2F2      | 5452    | POU domain, class 2, transcription factor 2 isoform 1      | NP_001193954.1    | 6          | 1                 | 2          | 3      | 2.23                                                     | 2.07                                                     |                                                                                        |                                                                                        |                                                                                               |                                                                                               | 1                                                                              | 1                                                                              | 1251    | 5452           | POU domain, class 2, transcription factor 2                                   | Transcription factor activity               | Nucleus               | Transcription factor               | Regulation of nucleobase, nucleoside, nucleotide and nucleic acid metabolism | POU;HOX                          | No                       |
| WRAP53      | 55135   | telomerase Cajal body protein 1                            | NP_001137463.1    | 1          | 1                 | 1          | 1      | 2.2                                                      | 3.5                                                      |                                                                                        |                                                                                        |                                                                                               |                                                                                               | 1                                                                              | 1                                                                              | 7670    | 55135          | None                                                                          | Molecular function unknown                  | Nucleus               | Unclassified                       | Biological process unknown                                                   | WD40                             | No                       |
| NUMBL       | 9253    | numb-like protein isoform a                                | NP_004747.1       | 2          | 1                 | 3          | 4      | 2.15                                                     | 3.41                                                     |                                                                                        |                                                                                        |                                                                                               |                                                                                               | 1                                                                              | 1                                                                              | 4931    | 9253           | numb homolog (Drosophila)-like                                                | Molecular function unknown                  | Cytoplasm             | Unclassified                       | Biological process unknown                                                   | PTB;CC                           | Yes                      |
| C11orf84    | 144097  | uncharacterized protein C11orf84                           | NP_612480.1       | 1          | 1                 | 1          | 2      | 2.11                                                     | 2.34                                                     |                                                                                        |                                                                                        |                                                                                               |                                                                                               | 1                                                                              | 1                                                                              | 14064   | 144097         | None                                                                          | Molecular function unknown                  | Nucleus               | Unclassified                       | Biological process unknown                                                   | -                                | No                       |
| TFPI2       | 7980    | tissue factor pathway inhibitor 2 isoform 1 precursor      | NP_006519.1       | 3          | 8                 | 8          | 46     | 2.08                                                     | 2.24                                                     | 6.86                                                                                   | 7                                                                                      | 73.2                                                                                          | 77.1                                                                                          | 21                                                                             | 19                                                                             | 8962    | 7980           | tissue factor pathway inhibitor 2                                             | Protease inhibitor activity                 | Extracellular         | Protease inhibitor                 | Protein metabolism                                                           | SP;KUNITZ                        | No                       |
| KRT23       | 25984   | keratin, type I cytoskeletal 23 isoform 1                  | NP_056330.3       | 8          | 15                | 17         | 50     | 2.07                                                     | 2.78                                                     | 5.75                                                                                   | 3.99                                                                                   | 65                                                                                            | 60                                                                                            | 25                                                                             | 25                                                                             | 5863    | 25984          | keratin 23 (histone deacetylase inducible)                                    | Molecular function unknown                  | Cytoplasm             | Unclassified                       | Biological process unknown                                                   | CC                               | Yes                      |
| GTF2H2C_2   | 730394  | general transcription factor IIB subunit 2-like protein    | NP_001035955.1    | 2          | 1                 | 1          | 1      | 2.06                                                     | 2.45                                                     |                                                                                        |                                                                                        |                                                                                               |                                                                                               | 1                                                                              | 1                                                                              |         |                |                                                                               |                                             |                       |                                    |                                                                              |                                  |                          |
| UQC3        | 790955  | ubiquinol-cytochrome-c reductase complex assembly factor 3 | NP_001078841.1    | 1          | 1                 | 1          | 2      | 2.06                                                     | 2.13                                                     |                                                                                        |                                                                                        |                                                                                               |                                                                                               | 1                                                                              | 1                                                                              |         |                |                                                                               |                                             |                       |                                    |                                                                              |                                  |                          |
| TRIML2      | 205860  | probable E3 ubiquitin-protein ligase TRIML2 isoform 1      | NP_001290348.1    | 2          | 2                 | 2          | 4      | 2.01                                                     | 4.42                                                     | 16.84                                                                                  | 20.37                                                                                  | 50.7                                                                                          | 201.3                                                                                         | 2                                                                              | 2                                                                              | 8696    | 205860         | None                                                                          | Molecular function unknown                  | -                     | Unclassified                       | Biological process unknown                                                   | PRY;SPRY                         | No                       |
| COL17A1     | 1308    | collagen alpha-1(XVII) chain                               | NP_000485.3       | 2          | 26                | 26         | 69     | 0.5                                                      | 0.43                                                     | 13.12                                                                                  | 16.26                                                                                  | 42.4                                                                                          | 45.4                                                                                          | 39                                                                             | 39                                                                             | 223     | 1308           | collagen, type XVII, alpha 1                                                  | Structural molecule activity                | Plasma membrane       | Anchor protein                     | Cell adhesion                                                                | TM;COLL                          | Yes                      |
| KRT17       | 3872    | keratin, type I cytoskeletal 17                            | NP_000413.1       | 2          | 27                | 48         | 425    | 0.5                                                      | 0.29                                                     | 15                                                                                     | 24.72                                                                                  | 92.1                                                                                          | 89.6                                                                                          | 111                                                                            | 111                                                                            | 1019    | 3872           | keratin 17                                                                    | Structural constituent of cytoskeleton      | Cytoplasm             | Cytoskeletal protein               | Cell growth and/or maintenance                                               | CC                               | Yes                      |
| DOCK1       | 1793    | dedicator of cytokinesis protein 1 isoform 1               | NP_001277152.1    | 2          | 2                 | 3          | 5      | 0.5                                                      | 0.24                                                     |                                                                                        |                                                                                        |                                                                                               |                                                                                               | 1                                                                              | 1                                                                              | 3240    | 1793           | dedicator of cytokinesis 1                                                    | Guanyl-nucleotide exchange factor activity  | Cytoplasm             | Guanine nucleotide exchange factor | Cell communication;Signal transduction                                       | SH3;CC                           | Yes                      |
| DST         | 667     | dystonin isoform 1e precursor                              | NP_001714.1       | 1          | 36                | 59         | 139    | 0.49                                                     | 0.48                                                     | 14.27                                                                                  | 11.61                                                                                  | 47.5                                                                                          | 37.1                                                                                          | 42                                                                             | 42                                                                             | 222     | 667            | dystonin                                                                      | Cytoskeletal protein binding                | Plasma membrane       | Cytoskeletal associated protein    | Cell growth and/or maintenance                                               | CH;CC;SPECTRI;N;SH3;EF;PLEC;GAS2 | Yes                      |
| DNAH10      | 196385  | dynein heavy chain 10, axonemal                            | NP_997320.2       | 1          | 1                 | 1          | 2      | 0.49                                                     | 0.38                                                     | 1.37                                                                                   | 15.59                                                                                  | 0.9                                                                                           | 8.4                                                                                           | 2                                                                              | 2                                                                              | 13473   | 196385         | dynein, axonemal, heavy polypeptide 10                                        | Structural constituent of cytoskeleton      | Cytoskeleton          | Cytoskeletal protein               | Cell growth and/or maintenance                                               | CC;AAA                           | Yes                      |
| TMPPRSS5    | 80975   | transmembrane protease serine 5 isoform 1                  | NP_110397.2       | 3          | 1                 | 1          | 1      | 0.49                                                     | 0.26                                                     |                                                                                        |                                                                                        |                                                                                               |                                                                                               | 1                                                                              | 1                                                                              | 5995    | 80975          | transmembrane protease, serine 5 (spinsin)                                    | Serine-type peptidase activity              | Plasma membrane       | Serine protease                    | Protein metabolism                                                           | TM;SR;TRYPSIN                    | No                       |
| AIG1        | 51390   | androgen-induced gene 1 protein isoform a                  | NP_057192.2       | 2          | 1                 | 1          | 2      | 0.49                                                     | 0.18                                                     |                                                                                        |                                                                                        |                                                                                               |                                                                                               | 1                                                                              | 1                                                                              | 16346   | 51390          | androgen-induced 1                                                            | Molecular function unknown                  | Integral to membrane  | Integral membrane protein          | Biological process unknown                                                   | TM                               | Yes                      |
| KRT6B       | 3854    | keratin, type II cytoskeletal 6B                           | NP_005546.2       | 5          | 5                 | 50         | 709    | 0.46                                                     | 0.31                                                     | 26.5                                                                                   | 41.06                                                                                  | 42.6                                                                                          | 44.9                                                                                          | 11                                                                             | 11                                                                             | 1012    | 3854           | keratin 6B                                                                    | Structural molecule activity                | Cytoplasm             | Structural protein                 | Cell growth and/or maintenance                                               | CC                               | Yes                      |
| PLEKHG3     | 26030   | pleckstrin homology domain-containing family G member 3    | NP_001295076.1    | 1          | 1                 | 1          | 1      | 0.45                                                     | 0.47                                                     |                                                                                        |                                                                                        |                                                                                               |                                                                                               | 1                                                                              | 1                                                                              | 17861   | 26030          | pleckstrin homology domain containing, family G (with RhoGef domain) member 3 | Guanyl-nucleotide exchange factor activity  | -                     | Guanine nucleotide exchange factor | Cell communication;Signal transduction                                       | RHOGEF;PH                        | No                       |
| KRT6A       | 3853    | keratin, type II cytoskeletal 6A                           | NP_005545.1       | 6          | 3                 | 51         | 793    | 0.45                                                     | 0.39                                                     | 17.33                                                                                  | 26.04                                                                                  | 44.4                                                                                          | 59.4                                                                                          | 30                                                                             | 30                                                                             | 1011    | 3853           | keratin 6A                                                                    | Structural molecule activity                | Cytoplasm             | Structural protein                 | Cell growth and/or maintenance                                               | CC                               | Yes                      |
| COL14A1     | 7373    | collagen alpha-1(XIV) chain precursor                      | NP_066933.1       | 1          | 2                 | 2          | 5      | 0.45                                                     | 0.29                                                     | 20.56                                                                                  | 125.71                                                                                 | 18.6                                                                                          | 83.4                                                                                          | 4                                                                              | 4                                                                              | 379     | 7373           | collagen, type XIV, alpha 1 (undulin)                                         | Extracellular matrix structural constituent | Extracellular         | Extracellular protein              | Cell growth and/or maintenance                                               | VWA;TSPN;COLL;SP;FN3             | Yes                      |
| C14orf2     | 9556    | 6.8 kDa mitochondrial proteolipid isoform 2                | NP_001120865.1    | 2          | 1                 | 1          | 2      | 0.45                                                     | 0.25                                                     |                                                                                        |                                                                                        |                                                                                               |                                                                                               | 1                                                                              | 1                                                                              | 5199    | 9556           | chromosome 14 open reading frame 2                                            | Molecular function unknown                  | -                     | Unclassified                       | Biological process unknown                                                   | TM                               | Yes                      |
| TRIM29      | 23650   | tripartite motif-containing protein 29                     | NP_036233.2       | 1          | 6                 | 6          | 8      | 0.44                                                     | 0.47                                                     | 9.69                                                                                   | 8.12                                                                                   | 9.5                                                                                           | 8.6                                                                                           | 5                                                                              | 5                                                                              | 10280   | 23650          | tripartite motif-containing 29                                                | Transcription regulator activity            | Cytoplasm             | Transcription regulatory protein   | Regulation of nucleobase, nucleoside, nucleotide and nucleic acid metabolism | BBOX;CC                          | Yes                      |
| DSC3        | 1825    | desmocollin-3 isoform Dsc3a preproprotein                  | NP_001932.2       | 2          | 10                | 10         | 19     | 0.44                                                     | 0.4                                                      | 11.82                                                                                  | 19                                                                                     | 19.8                                                                                          | 29.3                                                                                          | 14                                                                             | 14                                                                             | 2604    | 1825           | desmocollin 3                                                                 | Cell adhesion molecule activity             | Plasma membrane       | Adhesion molecule                  | Cell growth and/or maintenance                                               | SP;Cadherin;TM                   | Yes                      |
| EBP         | 10682   | 3-beta-hydroxysteroid-Delta(8), Delta(7)-isomerase         | NP_006570.1       | 1          | 1                 | 1          | 6      | 0.44                                                     | 0.25                                                     | 46.2                                                                                   | 86.24                                                                                  | 36.2                                                                                          | 39.4                                                                                          | 3                                                                              | 3                                                                              | 2192    | 10682          | etopamil binding protein (sterol isomerase)                                   | Isoomerase activity                         | Endoplasmic reticulum | Enzyme;Isoomerase                  | Metabolism;Energy pathways                                                   | TM                               | No                       |
| RAB25       | 57111   | ras-related protein Rab-25                                 | NP_065120.2       | 1          | 2                 | 2          | 4      | 0.42                                                     | 0.42                                                     | 1.28                                                                                   | 15.06                                                                                  | 0.8                                                                                           | 9.1                                                                                           | 2                                                                              | 2                                                                              | 6698    | 57111          | RAB25, member RAS oncogene family                                             | GTPase activity                             | Golgi apparatus       | GTPase                             | Cell communication;Signal transduction                                       | RAB                              | No                       |
| TMEM40      | 55287   | transmembrane protein 40 isoform a                         | NP_001271335.1    | 3          | 1                 | 1          | 2      | 0.4                                                      | 0.47                                                     |                                                                                        |                                                                                        |                                                                                               |                                                                                               | 1                                                                              | 1                                                                              | 8559    | 55287          | transmembrane protein 40                                                      | Molecular function unknown                  | Integral to membrane  | Unclassified                       | Biological process unknown                                                   | TM                               | No                       |
| SLC37A3     | 84255   | sugar phosphate exchanger 3 isoform 2                      | NP_115671.1       | 1          | 1                 | 1          | 1      | 0.4                                                      | 0.37                                                     |                                                                                        |                                                                                        |                                                                                               |                                                                                               | 1                                                                              | 1                                                                              | 15381   | 84255          | solite carrier family 37(glycerol 3-phosphate transporter), member 3          | Transporter activity                        | Integral to membrane  | Membrane transport protein         | Transport                                                                    | TM                               | No                       |

Supplementary Table S1. List of quantified proteins in OKF6/TERT1-Smoke cells  
 Raigopaln *et al.*, 2017. Role of protein kinase N2 (PKN2) in cigarette smoke-mediated oncogenic transformation of oral cells

| Gene Symbol | Gene ID | Protein Description                                         | Protein Accession | # Proteins | # Unique Peptides | # Peptides | # PSMs | OKF6/TERT1-Smoke/<br>OKF6/TERT1-Parental<br>(130/126) R1 | OKF6/TERT1-Smoke/<br>OKF6/TERT1-Parental<br>(128/127) R2 | Ratio Standard Errors [%]:<br>OKF6/TERT1-Smoke/<br>OKF6/TERT1-Parental<br>(130/126) R1 | Ratio Standard Errors [%]:<br>OKF6/TERT1-Smoke/<br>OKF6/TERT1-Parental<br>(128/127) R2 | Ratio Variabilities [%]:<br>F13: OKF6/TERT1-<br>Smoke/<br>OKF6/TERT1-Parental<br>(130/126) R1 | Ratio Variabilities [%]:<br>F13: OKF6/TERT1-<br>Smoke/<br>OKF6/TERT1-Parental<br>(128/127) R2 | Ratio Counts: F13:<br>OKF6/TERT1-Smoke/<br>OKF6/TERT1-Parental<br>(130/126) R1 | Ratio Counts: F13:<br>OKF6/TERT1-Smoke/<br>OKF6/TERT1-Parental<br>(128/127) R2 | HPRD ID | Entrez Gene Id | Gene Name                                                                                                    | Molecular Function                     | Primary Localization | Molecular Class                        | Biological Process                                                | Domains            | Plasma Proteome Database |
|-------------|---------|-------------------------------------------------------------|-------------------|------------|-------------------|------------|--------|----------------------------------------------------------|----------------------------------------------------------|----------------------------------------------------------------------------------------|----------------------------------------------------------------------------------------|-----------------------------------------------------------------------------------------------|-----------------------------------------------------------------------------------------------|--------------------------------------------------------------------------------|--------------------------------------------------------------------------------|---------|----------------|--------------------------------------------------------------------------------------------------------------|----------------------------------------|----------------------|----------------------------------------|-------------------------------------------------------------------|--------------------|--------------------------|
| FAM188B     | 84182   | protein FAM188B                                             | NP_115598.2       | 1          | 1                 | 1          | 1      | 0.39                                                     | 0.31                                                     |                                                                                        |                                                                                        |                                                                                               |                                                                                               | 1                                                                              | 1                                                                              | 13387   | 84182          | None                                                                                                         | Molecular function unknown             | -                    | Unclassified                           | Biological process unknown                                        | -                  | Yes                      |
| STUB1       | 10273   | E3 ubiquitin-protein ligase CHIP isoform a                  | NP_005852.2       | 2          | 2                 | 2          | 6      | 0.39                                                     | 0.26                                                     | 39.54                                                                                  | 106.68                                                                                 | 27.1                                                                                          | 50.2                                                                                          | 3                                                                              | 3                                                                              | 6232    | 10273          | STP1 homology and U-box containing protein 1                                                                 | Ligase activity                        | Cytoplasm            | Enzyme: Ligase                         | Metabolism;Energy pathways                                        | TPR;UBOX;CC        | No                       |
| KRT15       | 3866    | keratin, type I cytoskeletal 15                             | NP_002266.2       | 2          | 17                | 29         | 227    | 0.38                                                     | 0.33                                                     | 34.85                                                                                  | 46.38                                                                                  | 110.1                                                                                         | 133.9                                                                                         | 45                                                                             | 43                                                                             | 1009    | 3866           | keratin 15                                                                                                   | Structural constituent of cytoskeleton | Cytoplasm            | Cytoskeletal protein                   | Cell growth and/or maintenance                                    | CC                 | Yes                      |
| ZSWIM8      | 23053   | zinc finger SWIM domain-containing protein 8 isoform 3      | NP_001229417.1    | 3          | 2                 | 2          | 4      | 0.38                                                     | 0.2                                                      | 236.47                                                                                 | 729.39                                                                                 | 197.1                                                                                         | 824.5                                                                                         | 2                                                                              | 2                                                                              |         |                |                                                                                                              |                                        |                      |                                        |                                                                   |                    |                          |
| ZNF185      | 7739    | zinc finger protein 185 isoform 1                           | NP_001171577.1    | 8          | 4                 | 4          | 8      | 0.37                                                     | 0.38                                                     | 43.34                                                                                  | 21.15                                                                                  | 32.6                                                                                          | 16.2                                                                                          | 4                                                                              | 4                                                                              | 2306    | 7739           | zinc finger protein 185 (LM domain)                                                                          | Transcription regulator activity       | Nucleus              | Transcription regulatory protein       | Regulation of nucleobase, nucleoside and nucleic acid metabolism  | LIM                | Yes                      |
| FAM213A     | 84293   | redox-regulatory protein FAM213A isoform 1 precursor        | NP_001230709.1    | 3          | 1                 | 1          | 6      | 0.37                                                     | 0.27                                                     | 6.53                                                                                   | 177.5                                                                                  | 4.2                                                                                           | 97.5                                                                                          | 3                                                                              | 3                                                                              |         |                |                                                                                                              |                                        |                      |                                        |                                                                   |                    |                          |
| LAD1        | 3898    | ladinin-1                                                   | NP_00549.2        | 1          | 21                | 21         | 54     | 0.36                                                     | 0.45                                                     | 18.18                                                                                  | 21.43                                                                                  | 33.8                                                                                          | 51.5                                                                                          | 25                                                                             | 25                                                                             | 3815    | 3898           | ladinin 1                                                                                                    | Cytoskeletal anchoring activity        | Plasma membrane      | Anchor protein                         | Cell growth and/or maintenance                                    | -                  | Yes                      |
| SYTL1       | 84958   | synaptotagmin-like protein 1 isoform 1                      | NP_001180237.1    | 2          | 2                 | 2          | 3      | 0.36                                                     | 0.37                                                     |                                                                                        |                                                                                        |                                                                                               |                                                                                               | 1                                                                              | 1                                                                              | 12156   | 84958          | synaptotagmin-like 1                                                                                         | Molecular function unknown             | Plasma membrane      | Unclassified                           | Biological process unknown;Vesicle docking                        | SP;C2              | Yes                      |
| CALML3      | 810     | calmodulin-like protein 3                                   | NP_005176.1       | 1          | 4                 | 4          | 7      | 0.36                                                     | 0.31                                                     | 17.26                                                                                  | 75.11                                                                                  | 12.3                                                                                          | 49.4                                                                                          | 4                                                                              | 4                                                                              | 244     | 810            | calmodulin-like 3                                                                                            | Calcium ion binding                    | Cytoplasm            | Calcium binding protein                | Cell communication;Signal transduction                            | EF                 | Yes                      |
| SDPR        | 8436    | serum deprivation-response protein                          | NP_004648.1       | 1          | 1                 | 1          | 2      | 0.34                                                     | 0.49                                                     |                                                                                        |                                                                                        |                                                                                               |                                                                                               | 1                                                                              | 1                                                                              | 9470    | 8436           | serum deprivation response (phosphatidylserine binding protein)                                              | Serine-type peptidase activity         | Cytoplasm            | Serine protease                        | Cell growth and/or maintenance                                    | CC                 | Yes                      |
| KRT14       | 3861    | keratin, type I cytoskeletal 14                             | NP_000517.2       | 3          | 22                | 50         | 677    | 0.34                                                     | 0.41                                                     | 26.38                                                                                  | 19.29                                                                                  | 160.8                                                                                         | 128.8                                                                                         | 163                                                                            | 153                                                                            | 1017    | 3861           | keratin 14 (epidermolysis bullosa simplex;Dowling-Meara;Kobner)                                              | Structural constituent of cytoskeleton | Cytoplasm            | Cytoskeletal protein                   | Cell growth and/or maintenance                                    | CC                 | Yes                      |
| PKP1        | 5317    | plakophilin-1 isoform 1b                                    | NP_000290.2       | 2          | 9                 | 9          | 16     | 0.33                                                     | 0.33                                                     | 103.95                                                                                 | 91.4                                                                                   | 127.1                                                                                         | 102.2                                                                                         | 8                                                                              | 8                                                                              | 3579    | 5317           | plakophilin 1 (ectodermal dysplasia;skinfragility syndrome)                                                  | Cell adhesion molecule activity        | Nucleus              | Cell junction protein                  | Intercellular junction assembly and/or maintenance                | ARM                | Yes                      |
| IGSF3       | 3321    | immunoglobulin superfamily member 3 isoform 2 precursor     | NP_001007238.1    | 1          | 1                 | 1          | 3      | 0.33                                                     | 0.17                                                     |                                                                                        |                                                                                        |                                                                                               |                                                                                               | 1                                                                              | 1                                                                              | 4602    | 3321           | immunoglobulin superfamily, member 3                                                                         | Molecular function unknown             | Plasma membrane      | Integral membrane protein              | Biological process unknown                                        | IG;SP;TM           | No                       |
| IFT2        | 3433    | interferon-induced protein with tetratricopeptide repeats 2 | NP_001538.4       | 2          | 1                 | 2          | 3      | 0.33                                                     | 0.16                                                     |                                                                                        |                                                                                        |                                                                                               |                                                                                               | 1                                                                              | 1                                                                              | 913     | 3433           | interferon-induced protein with tetratricopeptide repeats 2                                                  | Cytoskeletal protein binding           | Cytoplasm            | Cytoskeletal associated protein        | Cell growth and/or maintenance                                    | TPR                | Yes                      |
| SERPIN13    | 5275    | serpin B13 isoform 1                                        | NP_001294852.1    | 2          | 1                 | 1          | 2      | 0.32                                                     | 0.5                                                      |                                                                                        |                                                                                        |                                                                                               |                                                                                               | 1                                                                              | 1                                                                              | 5118    | 5275           | serine (or cysteine) proteinase inhibitor, clade B (ovalbumin), member 13                                    | Protease inhibitor activity            | Cytoplasm            | Protease inhibitor                     | Protein metabolism                                                | SERPIN             | Yes                      |
| ITGB6       | 3694    | integrin beta-6 isoform a precursor                         | NP_000879.2       | 6          | 5                 | 5          | 13     | 0.31                                                     | 0.31                                                     | 19.96                                                                                  | 37.11                                                                                  | 16.5                                                                                          | 31.1                                                                                          | 7                                                                              | 7                                                                              | 947     | 3694           | integrin, beta 6                                                                                             | Receptor activity                      | Plasma membrane      | Cell surface receptor                  | Cell communication;Signal transduction                            | SP;PS1;VWA;EGFL;TM | Yes                      |
| KRT16       | 3868    | keratin, type I cytoskeletal 16                             | NP_005548.2       | 3          | 21                | 38         | 278    | 0.31                                                     | 0.25                                                     | 51.01                                                                                  | 93.02                                                                                  | 112.5                                                                                         | 218.3                                                                                         | 32                                                                             | 32                                                                             | 1018    | 3868           | keratin 16 (focal non-epidermolytic palmoplantar keratoderma)                                                | Structural constituent of cytoskeleton | Cytoplasm            | Cytoskeletal protein                   | Cell growth and/or maintenance                                    | CC                 | Yes                      |
| ANPEP       | 290     | aminopeptidase N precursor                                  | NP_001141.2       | 1          | 11                | 11         | 22     | 0.3                                                      | 0.29                                                     | 79.34                                                                                  | 75.25                                                                                  | 89.2                                                                                          | 77.7                                                                                          | 10                                                                             | 10                                                                             | 1055    | 290            | alanyl (membrane) aminopeptidase (aminopeptidase N; aminopeptidase M; microsomal aminopeptidase; CD13; p150) | Metallopeptidase activity              | Plasma membrane      | Metalloprotease                        | Protein metabolism                                                | TM                 | Yes                      |
| SYNRG       | 11276   | synergin gamma isoform 1                                    | NP_009178.3       | 7          | 2                 | 2          | 2      | 0.3                                                      | 0.16                                                     |                                                                                        |                                                                                        |                                                                                               |                                                                                               | 1                                                                              | 1                                                                              | 6291    | 11276          | API gamma subunit binding protein 1                                                                          | Transporter activity                   | Golgi apparatus      | Transport/cargo protein                | Transport                                                         | CC;EH              | Yes                      |
| CLCA2       | 9635    | calcium-activated chloride channel regulator 2 precursor    | NP_006527.1       | 1          | 2                 | 2          | 5      | 0.28                                                     | 0.28                                                     | 8.54                                                                                   | 63.1                                                                                   | 3.4                                                                                           | 25.7                                                                                          | 2                                                                              | 2                                                                              | 4923    | 9635           | chloride channel, calcium activated, family member 2                                                         | Auxiliary transport protein activity   | Plasma membrane      | Membrane transport protein             | Transport                                                         | TM;VWA;SP          | Yes                      |
| KRT5        | 3852    | keratin, type II cytoskeletal 5                             | NP_000415.2       | 4          | 33                | 52         | 793    | 0.27                                                     | 0.29                                                     | 22.39                                                                                  | 23.49                                                                                  | 121.2                                                                                         | 147                                                                                           | 249                                                                            | 248                                                                            | 1010    | 3852           | keratin 5 (epidermolysis bullosa simplex;Dowling-Meara;Kobner/Walker-Cockayne types)                         | Structural molecule activity           | Cytoplasm            | Structural protein                     | Cell growth and/or maintenance                                    | CC                 | Yes                      |
| ARHGAP6     | 395     | rho GTPase-activating protein 6 isoform 1                   | NP_038286.2       | 3          | 1                 | 1          | 1      | 0.26                                                     | 0.13                                                     |                                                                                        |                                                                                        |                                                                                               |                                                                                               | 1                                                                              | 1                                                                              | 2124    | 395            | Rho GTPase activating protein 6                                                                              | GTPase activator activity              | Cytoplasm            | GTPase activating protein              | Cell communication;Signal transduction                            | RHOGAP;SH3         | Yes                      |
| GPNMB       | 10457   | transmembrane glycoprotein NMB isoform a precursor          | NP_001005340.1    | 2          | 2                 | 2          | 4      | 0.25                                                     | 0.31                                                     | 287.97                                                                                 | 154.66                                                                                 | 138.3                                                                                         | 75                                                                                            | 2                                                                              | 2                                                                              | 5081    | 10457          | glycoprotein (transmembrane) nmb                                                                             | Molecular function unknown             | Plasma membrane      | Integral membrane protein;Unclassified | Cell communication;Signal transduction;Biological process unknown | SP;PKD;TM          | Yes                      |
| VSNL1       | 7447    | visinin-like protein 1                                      | NP_003376.2       | 1          | 6                 | 6          | 15     | 0.25                                                     | 0.25                                                     | 37.96                                                                                  | 91.83                                                                                  | 25.3                                                                                          | 67.1                                                                                          | 7                                                                              | 7                                                                              | 2890    | 7447           | visinin-like 1                                                                                               | Calcium ion binding                    | Plasma membrane      | Calcium binding protein                | Cell communication;Signal transduction                            | EF                 | Yes                      |

Supplementary Table S1. List of quantified proteins in OKF6/TERT1-Smoke cells  
 Raingopaln *et al.*, 2017. Role of protein kinase N2 (PKN2) in cigarette smoke-mediated oncogenic transformation of oral cells

| Gene Symbol | Gene ID | Protein Description                                                    | Protein Accession | # Proteins | # Unique Peptides | # Peptides | # PSMs | OKF6/TERT1-Smoke/<br>OKF6/TERT1-Parental<br>(130/126) R1 | OKF6/TERT1-Smoke/<br>OKF6/TERT1-Parental<br>(128/127) R2 | Ratio Standard Errors [%]:<br>OKF6/TERT1-Smoke/<br>OKF6/TERT1-Parental<br>(130/126) R1 | Ratio Standard Errors [%]:<br>OKF6/TERT1-Smoke/<br>OKF6/TERT1-Parental<br>(128/127) R2 | Ratio Variabilities [%]:<br>F13: OKF6/TERT1-<br>Smoke/<br>OKF6/TERT1-Parental<br>(130/126) R1 | Ratio Variabilities [%]:<br>F13: OKF6/TERT1-<br>Smoke/<br>OKF6/TERT1-Parental<br>(128/127) R2 | Ratio Counts: F13:<br>OKF6/TERT1-Smoke/<br>OKF6/TERT1-Parental<br>(130/126) R1 | Ratio Counts: F13:<br>OKF6/TERT1-Smoke/<br>OKF6/TERT1-Parental<br>(128/127) R2 | HPRD ID | Entrez Gene ID | Gene Name                                                                                       | Molecular Function                       | Primary Localization | Molecular Class                     | Biological Process                                                           | Domains                        | Plasma Proteome Database |
|-------------|---------|------------------------------------------------------------------------|-------------------|------------|-------------------|------------|--------|----------------------------------------------------------|----------------------------------------------------------|----------------------------------------------------------------------------------------|----------------------------------------------------------------------------------------|-----------------------------------------------------------------------------------------------|-----------------------------------------------------------------------------------------------|--------------------------------------------------------------------------------|--------------------------------------------------------------------------------|---------|----------------|-------------------------------------------------------------------------------------------------|------------------------------------------|----------------------|-------------------------------------|------------------------------------------------------------------------------|--------------------------------|--------------------------|
| LAMC3       | 10319   | laminin subunit gamma-3 precursor                                      | NP_06050.3        | 1          | 1                 | 1          | 1      | 0.22                                                     | 0.21                                                     |                                                                                        |                                                                                        |                                                                                               |                                                                                               | 1                                                                              | 1                                                                              | 5069    | 10319          | laminin, gamma 3                                                                                | Structural molecule activity             | Extracellular        | Structural protein                  | Cell growth and/or maintenance                                               | LAMNT;EGFLA;MLAMB;SP;CC        | Yes                      |
| SYNE2       | 23224   | nesprin-2 isoform 5                                                    | NP_878918.2       | 2          | 1                 | 1          | 2      | 0.21                                                     | 0.32                                                     |                                                                                        |                                                                                        |                                                                                               |                                                                                               | 1                                                                              | 1                                                                              | 9763    | 23224          | spectrin repeat containing nuclear envelope 2                                                   | Structural constituent of cytoskeleton   | Nucleus/Cytoplasm    | Cytoskeletal protein                | Cell growth and/or maintenance                                               | NLS;LZ;CH;CC;SPECTRIN;TM       | Yes                      |
| KRT84       | 3890    | keratin, type II cuticular Hb4                                         | NP_149034.2       | 3          | 2                 | 6          | 32     | 0.21                                                     | 0.17                                                     | 47.11                                                                                  | 146.02                                                                                 | 26.1                                                                                          | 72.3                                                                                          | 7                                                                              | 7                                                                              | 9098    | 3890           | keratin, hair, basic, 4                                                                         | Structural molecule activity             | -                    | Structural protein                  | Cell growth and/or maintenance                                               | -                              | Yes                      |
| GPR27       | 2850    | probable G-protein coupled receptor 27                                 | NP_061844.1       | 1          | 1                 | 1          | 1      | 0.2                                                      | 0.09                                                     |                                                                                        |                                                                                        |                                                                                               |                                                                                               | 1                                                                              | 1                                                                              | 5542    | 2850           | G protein-coupled receptor 27                                                                   | G-protein coupled receptor activity      | Plasma membrane      | G protein coupled receptor          | Cell communication;Signal transduction                                       | TM                             | Yes                      |
| KRT78       | 196374  | keratin, type II cytoskeletal 78 isoform 1                             | NP_775487.2       | 3          | 1                 | 4          | 13     | 0.19                                                     | 0.21                                                     | 77.34                                                                                  | 230.67                                                                                 | 21.5                                                                                          | 78.8                                                                                          | 2                                                                              | 2                                                                              | 17171   | 196374         | None                                                                                            | Structural molecule activity             | -                    | Structural protein                  | Cell growth and/or maintenance                                               | CC                             | Yes                      |
| NOTCH4      | 4855    | neuregulin locus notch homolog protein 4 preproprotein                 | NP_004548.3       | 1          | 1                 | 1          | 1      | 0.19                                                     | 0.11                                                     |                                                                                        |                                                                                        |                                                                                               |                                                                                               | 1                                                                              | 1                                                                              | 1290    | 4855           | Notch homolog 4 (Drosophila)                                                                    | Receptor activity                        | Plasma membrane      | Cell surface receptor               | Cell communication;Signal transduction                                       | SP;EGFCA;EGF;ANK;TM;NOTC;HPEST | Yes                      |
| IGSF22      | 283284  | immunoglobulin superfamily member 22                                   | NP_758859.3       | 1          | 1                 | 1          | 1      | 0.17                                                     | 0.1                                                      |                                                                                        |                                                                                        |                                                                                               |                                                                                               | 1                                                                              | 1                                                                              | 8229    | 283284         | None                                                                                            | Molecular function unknown               | -                    | Unclassified                        | Biological_process unknown                                                   | IG;FN3                         | No                       |
| SPRY4       | 81848   | protein sprouty homolog 4 isoform 1                                    | NP_112226.2       | 2          | 1                 | 1          | 1      | 0.17                                                     | 0.09                                                     |                                                                                        |                                                                                        |                                                                                               |                                                                                               | 1                                                                              | 1                                                                              | 10466   | 81848          | sprouty homolog 4 (Drosophila)                                                                  | Molecular function unknown               | Cytoplasm            | Unclassified                        | Cell communication;Signal transduction                                       | -                              | Yes                      |
| KIF27       | 55582   | kinesin-like protein KIF27 isoform A                                   | NP_060046.1       | 4          | 1                 | 2          | 4      | 0.17                                                     | 0.06                                                     |                                                                                        |                                                                                        |                                                                                               |                                                                                               | 1                                                                              | 1                                                                              | 11179   | 55582          | kinesin family member 27                                                                        | Motor activity                           | -                    | Motor protein                       | Cell growth and/or maintenance                                               | CC                             | Yes                      |
| ANKRD35     | 148741  | ankyrin repeat domain-containing protein 35 isoform 1                  | NP_653299.4       | 3          | 1                 | 2          | 3      | 0.14                                                     | 0.03                                                     |                                                                                        |                                                                                        |                                                                                               |                                                                                               | 1                                                                              | 1                                                                              | 8050    | 148741         | ankyrin repeat domain 35                                                                        | Molecular function unknown               | -                    | Unclassified                        | Biological_process unknown                                                   | ANK;CC                         | Yes                      |
| FAM168B     | 130074  | myelin-associated neurite-outgrowth inhibitor                          | NP_001009993.2    | 1          | 1                 | 1          | 1      | 0.13                                                     | 0.03                                                     |                                                                                        |                                                                                        |                                                                                               |                                                                                               | 1                                                                              | 1                                                                              | 17295   | 130074         | None                                                                                            | Molecular function unknown               | -                    | Unclassified                        | Biological_process unknown                                                   | -                              | No                       |
| ZBTB9       | 221504  | zinc finger and BTB domain-containing protein 9                        | NP_689948.1       | 1          | 1                 | 1          | 1      | 0.09                                                     | 0.04                                                     |                                                                                        |                                                                                        |                                                                                               |                                                                                               | 1                                                                              | 1                                                                              | 15695   | 221504         | zinc finger and BTB domain containing 9                                                         | Transcription factor activity            | Nucleus              | Transcription factor                | Regulation of nucleobase, nucleoside, nucleotide and nucleic acid metabolism | BTB;ZNF;C2                     | Yes                      |
| TENM2       | 57451   | teneurin-2                                                             | NP_001116151.1    | 1          | 2                 | 2          | 3      | 0.08                                                     | 0.05                                                     |                                                                                        |                                                                                        |                                                                                               |                                                                                               | 1                                                                              | 1                                                                              |         |                |                                                                                                 |                                          |                      |                                     |                                                                              |                                |                          |
| SERPINA7    | 6906    | thryocine-binding globulin precursor                                   | NP_000345.2       | 1          | 1                 | 1          | 1      | 2.05                                                     | 0.29                                                     |                                                                                        |                                                                                        |                                                                                               |                                                                                               | 1                                                                              | 1                                                                              | 2438    | 6906           | serine (or cysteine) proteinase inhibitor, clade A (alpha-1 antitrypsin, antitrypsin), member 7 | Protease inhibitor activity              | Extracellular        | Protease inhibitor                  | Protein metabolism                                                           | SERPIN;SP                      | Yes                      |
| SLFN11      | 91607   | schlafen family member 11                                              | NP_001098057.1    | 2          | 1                 | 3          | 6      | 0.48                                                     | 27.19                                                    |                                                                                        |                                                                                        |                                                                                               |                                                                                               | 1                                                                              | 1                                                                              | 8178    | 91607          | None                                                                                            | Growth factor activity                   | -                    | Cell cycle control protein          | Cell development;Cell growth and/or maintenance                              | -                              | No                       |
| C19orf52    | 90580   | uncharacterized protein C19orf52                                       | NP_612367.1       | 1          | 1                 | 1          | 2      | 0.4                                                      | 4.48                                                     |                                                                                        |                                                                                        |                                                                                               |                                                                                               | 1                                                                              | 1                                                                              | 14275   | 90580          | None                                                                                            | Molecular function unknown               | -                    | Unclassified                        | Biological_process unknown                                                   | -                              | No                       |
| RHOA        | 387     | transforming protein RhoA precursor                                    | NP_001655.1       | 2          | 2                 | 9          | 50     | 0.34                                                     | 3.51                                                     | 70                                                                                     | 10.05                                                                                  | 57.4                                                                                          | 92.8                                                                                          | 5                                                                              | 5                                                                              | 1323    | 387            | ras homolog gene family, member A                                                               | GTPase activity                          | Cytoplasm            | GTPase                              | Cell communication;Signal transduction                                       | RHO                            | No                       |
| SELENBP1    | 8991    | selenium-binding protein 1 isoform 3                                   | NP_001245218.1    | 3          | 1                 | 1          | 1      | 0.31                                                     | 4.51                                                     |                                                                                        |                                                                                        |                                                                                               |                                                                                               | 1                                                                              | 1                                                                              | 5007    | 8991           | selenium binding protein 1                                                                      | Molecular function unknown               | Cytoplasm            | Unclassified                        | Protein metabolism                                                           | -                              | Yes                      |
| HSPB6       | 126393  | heat shock protein beta-6                                              | NP_653218.1       | 1          | 1                 | 1          | 16     | 0.26                                                     | 2.55                                                     | 141.75                                                                                 | 13.11                                                                                  | 97.4                                                                                          | 75                                                                                            | 5                                                                              | 4                                                                              | 8130    | 126393         | heat shock protein, alpha-cristalinin-related,B6                                                | Chaperone activity                       | -                    | Chaperone                           | Protein metabolism                                                           | -                              | Yes                      |
| LONRF1      | 91694   | LON peptidase N-terminal domain and RING finger protein 1              | NP_689484.3       | 1          | 1                 | 1          | 1      | 0.21                                                     | 6.06                                                     |                                                                                        |                                                                                        |                                                                                               |                                                                                               | 1                                                                              | 1                                                                              | 8674    | 91694          | None                                                                                            | Ubiquitin-specific protease activity     | -                    | Ubiquitin proteasome system protein | Protein metabolism                                                           | RING;TPR                       | No                       |
| PYDC2       | 152138  | pyrin domain-containing protein 2                                      | NP_001076777.1    | 1          | 1                 | 1          | 1      | 7.81                                                     | 0.58                                                     |                                                                                        |                                                                                        |                                                                                               |                                                                                               | 1                                                                              | 1                                                                              | 19279   | 152138         | None                                                                                            | Transcription regulator activity         | Nucleus              | Transcription regulator protein     | Biological_process unknown;Regulation of signal transduction                 | -                              | No                       |
| PLA2G6      | 8398    | 85.88 kDa calcium-independent phospholipase A2 isoform a               | NP_003551.2       | 2          | 1                 | 1          | 2      | 7.66                                                     | 0.65                                                     |                                                                                        |                                                                                        |                                                                                               |                                                                                               | 1                                                                              | 1                                                                              | 4675    | 8398           | phospholipase A2, group VI (cytosolic, calcium independent)                                     | Phospholipase activity                   | Cytoplasm            | Enzyme: Phospholipase               | Lipid metabolism                                                             | ANK                            | Yes                      |
| MYH14       | 79784   | myosin-14 isoform 3                                                    | NP_001139281.1    | 11         | 2                 | 14         | 179    | 5.92                                                     |                                                          |                                                                                        |                                                                                        |                                                                                               |                                                                                               | 1                                                                              |                                                                                | 10543   | 79784          | myosin, heavy polypeptide 14                                                                    | Structural molecule activity             | -                    | Structural protein                  | Cell growth and/or maintenance                                               | MYOSIN;IQ;CC                   | Yes                      |
| C21orf59    | 56683   | UPF0769 protein C21orf59                                               | NP_067077.1       | 1          | 3                 | 3          | 3      | 5.67                                                     | 1.27                                                     | 30.11                                                                                  | 1                                                                                      | 1847.8                                                                                        | 1.8                                                                                           | 2                                                                              | 2                                                                              | 10756   | 56683          | chromosome 21 open reading frame 59                                                             | Molecular function unknown               | -                    | Unclassified                        | Biological_process unknown                                                   | -                              | Yes                      |
| PBK         | 55872   | lymphokine-activated killer T-cell-originated protein kinase isoform 2 | NP_001265874.1    | 2          | 2                 | 2          | 11     | 5.09                                                     | 0.62                                                     | 11.4                                                                                   | 23.48                                                                                  | 255.7                                                                                         | 37.1                                                                                          | 6                                                                              | 6                                                                              | 17822   | 55872          | PDZ binding kinase                                                                              | Protein serine/threonine kinase activity | Cytoplasm            | Serine/threonine kinase             | Cell communication;Signal transduction                                       | S_T_kinase                     | Yes                      |
| LACTB2      | 51110   | beta-lactamase-like protein 2                                          | NP_057111.1       | 1          | 1                 | 1          | 9      | 4.67                                                     | 1.46                                                     | 8.88                                                                                   | 5.09                                                                                   | 116.9                                                                                         | 16.7                                                                                          | 5                                                                              | 5                                                                              | 13955   | 51110          | lactamase, beta 2                                                                               | Molecular function unknown               | -                    | Unclassified                        | Biological_process unknown                                                   | -                              | No                       |
| CRYBG3      | 131544  | very large A-kinase anchor protein                                     | NP_705833.3       | 1          | 1                 | 1          | 4      | 4.1                                                      | 0.92                                                     | 20.35                                                                                  | 36.85                                                                                  | 173.9                                                                                         | 51                                                                                            | 2                                                                              | 2                                                                              | 19091   | 131544         | None                                                                                            | Molecular function unknown               | -                    | Unclassified                        | Biological_process unknown                                                   | CC;XTAL;RICIN                  | No                       |
| RSPH9       | 221421  | radial spoke head protein 9 homolog isoform 1                          | NP_689945.2       | 1          | 1                 | 1          | 2      | 4                                                        | 0.7                                                      |                                                                                        |                                                                                        |                                                                                               |                                                                                               | 1                                                                              | 1                                                                              | 12875   | 221421         | chromosome 6 open reading frame 206                                                             | Molecular function unknown               | -                    | Unclassified                        | Biological_process unknown                                                   | SP                             | No                       |
| ANGPTL4     | 51129   | angiopoietin-related protein 4 isoform a precursor                     | NP_647475.1       | 1          | 1                 | 1          | 2      | 3.85                                                     | 1.87                                                     |                                                                                        |                                                                                        |                                                                                               |                                                                                               | 1                                                                              | 1                                                                              | 16173   | 51129          | angiopoietin-like 4                                                                             | Molecular function unknown               | Extracellular        | Secreted polypeptide                | Anti-apoptosis                                                               | SP;CC;FBG                      | Yes                      |

Supplementary Table S1. List of quantified proteins in OKF6/TERT1-Smoke cells  
 Raingonalan *et al.*, 2017. Role of protein kinase N2 (PKN2) in cigarette smoke-mediated oncogenic transformation of oral cells

| Gene Symbol | Gene ID | Protein Description                                                | Protein Accession | # Proteins | # Unique Peptides | # Peptides | # PSMs | OKF6/TERT1-Smoke/<br>OKF6/TERT1-Parental<br>(130/126) R1 | OKF6/TERT1-Smoke/<br>OKF6/TERT1-Parental<br>(128/127) R2 | Ratio Standard Errors [%]:<br>OKF6/TERT1-Smoke/<br>OKF6/TERT1-Parental<br>(130/126) R1 | Ratio Standard Errors [%]:<br>OKF6/TERT1-Smoke/<br>OKF6/TERT1-Parental<br>(128/127) R2 | Ratio Variabilities [%]:<br>F13: OKF6/TERT1-<br>Smoke/<br>OKF6/TERT1-Parental<br>(130/126) R1 | Ratio Variabilities [%]:<br>F13: OKF6/TERT1-<br>Smoke/<br>OKF6/TERT1-Parental<br>(128/127) R2 | Ratio Counts: F13:<br>OKF6/TERT1-Smoke/<br>OKF6/TERT1-Parental<br>(130/126) R1 | Ratio Counts: F13:<br>OKF6/TERT1-Smoke/<br>OKF6/TERT1-Parental<br>(128/127) R2 | HPRD ID | Entrez Gene Id | Gene Name                                                                   | Molecular Function                          | Primary Localization        | Molecular Class                     | Biological Process                                                           | Domains       | Plasma Proteome Database |
|-------------|---------|--------------------------------------------------------------------|-------------------|------------|-------------------|------------|--------|----------------------------------------------------------|----------------------------------------------------------|----------------------------------------------------------------------------------------|----------------------------------------------------------------------------------------|-----------------------------------------------------------------------------------------------|-----------------------------------------------------------------------------------------------|--------------------------------------------------------------------------------|--------------------------------------------------------------------------------|---------|----------------|-----------------------------------------------------------------------------|---------------------------------------------|-----------------------------|-------------------------------------|------------------------------------------------------------------------------|---------------|--------------------------|
| PAQR7       | 164091  | membrane progesterin receptor alpha                                | NP_848509.1       | 1          | 1                 | 1          | 2      | 3.51                                                     | 0.92                                                     |                                                                                        |                                                                                        |                                                                                               |                                                                                               | 1                                                                              | 1                                                                              | 9692    | 164091         | progesterin and adipoQ receptor family member VII                           | Receptor activity                           | Plasma membrane             | Cell surface receptor               | Cell communication;Signal transduction                                       | TM            | No                       |
| NEB         | 4703    | nebulin isoform 4                                                  | NP_001258137.1    | 3          | 1                 | 1          | 1      | 3.42                                                     | 1.85                                                     |                                                                                        |                                                                                        |                                                                                               |                                                                                               | 1                                                                              | 1                                                                              | 1196    | 4703           | nebulin                                                                     | Structural constituent of cytoskeleton      | Cytoplasm                   | Cytoskeletal protein                | Cell growth and/or maintenance                                               | NEBULIN;SH3   | Yes                      |
| PARP10      | 84875   | poly [ADP-ribose] polymerase 10                                    | NP_116178.2       | 1          | 2                 | 2          | 3      | 3.41                                                     | 0.67                                                     |                                                                                        |                                                                                        |                                                                                               |                                                                                               | 1                                                                              | 1                                                                              | 15100   | 84875          | poly (ADP-ribose) polymerase family, member 10                              | Molecular function unknown                  | -                           | Unclassified                        | Regulation of nucleobase, nucleoside, nucleotide and nucleic acid metabolism | -             | No                       |
| FAAH        | 2166    | fatty acid amide hydrolase 1                                       | NP_001432.2       | 1          | 1                 | 1          | 2      | 2.96                                                     | 0.69                                                     |                                                                                        |                                                                                        |                                                                                               |                                                                                               | 1                                                                              | 1                                                                              | 4244    | 2166           | fatty acid amide hydrolase                                                  | Hydrolase activity                          | Plasma membrane             | Enzyme: Hydrolase                   | Metabolism;Energy pathways                                                   | TM            | Yes                      |
| CUTC        | 51076   | copper homeostasis protein cutC homolog                            | NP_057044.2       | 1          | 1                 | 1          | 4      | 2.95                                                     | 0.87                                                     | 7                                                                                      | 6.41                                                                                   | 29.9                                                                                          | 7.9                                                                                           | 2                                                                              | 2                                                                              | 13100   | 51076          | cutC copper transporter homolog (E.coli)                                    | Molecular function unknown                  | Nucleolus                   | Unclassified                        | Biological process unknown                                                   | -             | Yes                      |
| NUDT4       | 11163   | diphosphoinositol polyphosphate phosphohydrolase 2 isoform beta    | NP_950241.1       | 6          | 1                 | 1          | 3      | 2.77                                                     | 0.86                                                     | 16.17                                                                                  | 7.41                                                                                   | 70.3                                                                                          | 9.1                                                                                           | 2                                                                              | 2                                                                              | 14850   | 11163          | ndix (nucleoside diphosphate linked moietyX)-type motif 4                   | Molecular function unknown                  | -                           | Unclassified                        | Biological process unknown                                                   | -             | No                       |
| ARMC12      | 221481  | armadillo repeat-containing protein 12 isoform a                   | NP_659465.2       | 3          | 1                 | 1          | 2      | 2.75                                                     | 0.56                                                     |                                                                                        |                                                                                        |                                                                                               |                                                                                               | 1                                                                              | 1                                                                              |         |                |                                                                             |                                             |                             |                                     |                                                                              |               |                          |
| HMGNS       | 79366   | high mobility group nucleosome-binding domain-containing protein 5 | NP_110390.1       | 1          | 2                 | 2          | 3      | 2.61                                                     | 0.76                                                     | 13.69                                                                                  | 31.26                                                                                  | 53.9                                                                                          | 34.4                                                                                          | 2                                                                              | 2                                                                              | 2310    | 79366          | nucleosomal binding protein 1                                               | Transcription regulator activity            | Nucleus                     | Transcription regulatory protein    | Regulation of nucleobase, nucleoside, nucleotide and nucleic acid metabolism | CC            | Yes                      |
| DDAH1       | 23576   | N(G,N(G)-dimethylarginine dimethylaminohydrolase 1 isoform 1       | NP_036269.1       | 2          | 1                 | 1          | 6      | 2.56                                                     | 1.14                                                     | 0.49                                                                                   | 5.54                                                                                   | 2.2                                                                                           | 11                                                                                            | 3                                                                              | 3                                                                              | 9203    | 23576          | dimethylarginine dimethylaminohydrolase 1                                   | Hydrolase activity                          | Cytoplasm                   | Enzyme: Hydrolase                   | Metabolism;Energy pathways                                                   | CC;CYCLIN     | Yes                      |
| DMWD        | 1762    | dystrophia myotonica WD repeat-containing protein                  | NP_004934.1       | 1          | 1                 | 1          | 1      | 2.55                                                     | 0.58                                                     |                                                                                        |                                                                                        |                                                                                               |                                                                                               | 1                                                                              | 1                                                                              | 13235   | 1762           | dystrophia myotonica-containing WD repeat motif                             | Molecular function unknown                  | -                           | Unclassified                        | Cell growth and/or maintenance;Biological process unknown                    | WD40          | Yes                      |
| IQGAP3      | 128239  | ras GTPase-activating-like protein IQGAP3                          | NP_839943.2       | 3          | 2                 | 5          | 13     | 2.51                                                     | 1.43                                                     |                                                                                        |                                                                                        |                                                                                               |                                                                                               | 1                                                                              | 1                                                                              | 11051   | 128239         | IQ motif containing GTPase activating protein3                              | GTPase activator activity                   | Nucleus                     | GTPase activating protein           | Cell communication;Signal transduction                                       | CHI3Q;RASGAP  | Yes                      |
| PHP         | 55023   | PH-interacting protein                                             | NP_060404.3       | 1          | 3                 | 3          | 3      | 2.5                                                      | 0.7                                                      |                                                                                        |                                                                                        |                                                                                               |                                                                                               | 1                                                                              | 1                                                                              | 10152   | 55023          | pleckstrin homology domain interacting protein                              | Receptor binding                            | -                           | Ligand                              | Cell communication;Signal transduction                                       | WD40;CC;BROMO | No                       |
| VTN         | 7448    | vitronectin precursor                                              | NP_000629.3       | 1          | 2                 | 2          | 3      | 2.48                                                     | 1.7                                                      | 23.28                                                                                  | 55.65                                                                                  | 97.6                                                                                          | 222.9                                                                                         | 2                                                                              | 2                                                                              | 1902    | 7448           | vitronectin (serum spreading factor, somatomedin B, complement S-protein)   | Extracellular matrix structural constituent | Extracellular               | Extracellular matrix protein        | Cell growth and/or maintenance                                               | SOM;HX;SP     | Yes                      |
| UCHL1       | 7345    | ubiquitin carboxyl-terminal hydrolase isozyme L1                   | NP_004172.2       | 1          | 7                 | 7          | 14     | 2.45                                                     | 1.85                                                     | 4.77                                                                                   | 4.68                                                                                   | 34                                                                                            | 24.8                                                                                          | 8                                                                              | 8                                                                              | 1877    | 7345           | ubiquitin carboxyl-terminal hydrolase L1 (ubiquitin thioesterase)           | Ubiquitin-specific protease activity        | Cytoplasm                   | Ubiquitin proteasome system protein | Protein metabolism                                                           | -             | Yes                      |
| CROCC       | 9696    | rootletin                                                          | NP_055490.4       | 1          | 3                 | 4          | 6      | 2.39                                                     | 1.9                                                      |                                                                                        |                                                                                        |                                                                                               |                                                                                               | 1                                                                              | 1                                                                              | 16758   | 9696           | ciliary rootlet coiled-coil, rootletin                                      | Structural molecule activity                | Cytoplasm                   | Structural protein                  | Cell growth and/or maintenance                                               | CC            | No                       |
| MAN1A1      | 4121    | mannosyl-oligosaccharide 1,2-alpha-mannosidase 1A                  | NP_005898.2       | 1          | 2                 | 2          | 4      | 2.38                                                     | 0.83                                                     |                                                                                        |                                                                                        |                                                                                               |                                                                                               | 1                                                                              | 1                                                                              | 5066    | 4121           | mannosidase, alpha, class 1A, member 1                                      | Hydrolase activity                          | Endoplasmic reticulum       | Enzyme: Hydrolase                   | Metabolism;Energy pathways                                                   | TM;CC         | Yes                      |
| PIP5K1C     | 23396   | phosphatidylinositol 4-phosphate 5-kinase type-1 gamma isoform 3   | NP_001287778.1    | 3          | 1                 | 1          | 2      | 2.35                                                     | 0.62                                                     |                                                                                        |                                                                                        |                                                                                               |                                                                                               | 1                                                                              | 1                                                                              | 5834    | 23396          | phosphatidylinositol 4-phosphate 5-kinase type I, gamma                     | Lipid kinase activity                       | Cytoplasm                   | Lipid Kinase                        | Cell communication;Signal transduction                                       | PIP5Kc        | No                       |
| NPM1        | 4869    | nucleophosmin isoform 3                                            | NP_001032827.1    | 3          | 1                 | 16         | 125    | 2.26                                                     | 0.57                                                     |                                                                                        |                                                                                        |                                                                                               |                                                                                               | 1                                                                              | 1                                                                              | 1246    | 4869           | nucleophosmin (nucleolar phosphoprotein B23, matrinin)                      | Chaperone activity                          | Nucleolus;Nucleus;Cytoplasm | Chaperone                           | Protein metabolism                                                           | -             | Yes                      |
| DNAJB6      | 10049   | dnaJ homolog subfamily B member 6 isoform a                        | NP_490647.1       | 3          | 1                 | 2          | 4      | 2.16                                                     | 1                                                        |                                                                                        |                                                                                        |                                                                                               |                                                                                               | 1                                                                              | 1                                                                              | 7107    | 10049          | DnaJ (Hsp40) homolog subfamily B, member 6                                  | Chaperone activity                          | Cytoplasm;Nucleus           | Chaperone                           | Protein metabolism;Protein folding                                           | DNAJ          | Yes                      |
| TMEM132A    | 54972   | transmembrane protein 132A isoform a precursor                     | NP_060340.2       | 2          | 1                 | 1          | 2      | 2.15                                                     | 1.27                                                     |                                                                                        |                                                                                        |                                                                                               |                                                                                               | 1                                                                              | 1                                                                              | 11034   | 54972          | heat shock 70kDa protein 5glucoseregulated protein, 78kDa binding protein 1 | Molecular function unknown                  | Endoplasmic reticulum       | Unclassified                        | Biological process unknown                                                   | CC;TM         | No                       |
| TNFAIP8     | 25816   | tumor necrosis factor alpha-induced protein 8 isoform c            | NP_001273743.1    | 4          | 1                 | 1          | 2      | 2.15                                                     | 0.6                                                      |                                                                                        |                                                                                        |                                                                                               |                                                                                               | 1                                                                              | 1                                                                              | 18204   | 25816          | tumor necrosis factor, alpha-induced protein8                               | Molecular function unknown                  | Cytoplasm                   | Unclassified                        | Cell growth and/or maintenance                                               | DED           | No                       |
| TSSC4       | 10078   | protein TSSC4 isoform a                                            | NP_005697.2       | 2          | 1                 | 1          | 1      | 2.09                                                     | 1.61                                                     |                                                                                        |                                                                                        |                                                                                               |                                                                                               | 1                                                                              | 1                                                                              | 10357   | 10078          | tumor suppressing substransferable candidate 4                              | Molecular function unknown                  | Cytoplasm                   | Unclassified                        | Biological process unknown                                                   | -             | No                       |
| HMG2        | 8091    | high mobility group protein HMG1-C isoform c                       | NP_001287847.1    | 4          | 5                 | 5          | 26     | 2.07                                                     | 1.68                                                     | 3.31                                                                                   | 3.42                                                                                   | 26.1                                                                                          | 21.7                                                                                          | 14                                                                             | 14                                                                             | 2827    | 8091           | high mobility group AT-hook 2                                               | Transcription factor activity               | Nucleus                     | Transcription factor                | Regulation of nucleobase, nucleoside, nucleotide and nucleic acid metabolism | AT_hook       | Yes                      |
| RHBDD2      | 57414   | rhomoid domain-containing protein 2 isoform a                      | NP_001035546.1    | 1          | 2                 | 2          | 2      | 2.07                                                     | 1.49                                                     |                                                                                        |                                                                                        |                                                                                               |                                                                                               | 1                                                                              | 1                                                                              | 11492   | 57414          | rhomoid, veinlet-like 7 (Drosophila)                                        | Molecular function unknown                  | -                           | Integral membrane protein           | Biological process unknown                                                   | TM            | No                       |
| ATP6V0C     | 527     | V-type proton ATPase 16 kDa proteolipid subunit                    | NP_001185498.1    | 1          | 1                 | 1          | 2      | 2.06                                                     | 1.03                                                     | 2.34                                                                                   | 136.1                                                                                  | 6.8                                                                                           | 715.1                                                                                         | 2                                                                              | 2                                                                              | 162     | 527            | ATPase, H+-transporting, lysosomal 16kDa, V0subunit c                       | ATPase activity                             | Lysosome                    | ATPase                              | Transport                                                                    | TM;SP         | Yes                      |

Supplementary Table S1. List of quantified proteins in OKF6/TERT1-Smoke cells  
 Raingopaln *et al.*, 2017. Role of protein kinase N2 (PKN2) in cigarette smoke-mediated oncogenic transformation of oral cells

| Gene Symbol | Gene ID | Protein Description                                                         | Protein Accession | # Proteins | # Unique Peptides | # Peptides | # PSMs | OKF6/TERT1-Smoke/<br>OKF6/TERT1-Parental<br>(130/126) R1 | OKF6/TERT1-Smoke/<br>OKF6/TERT1-Parental<br>(128/127) R2 | Ratio Standard Errors [%]:<br>OKF6/TERT1-Smoke/<br>OKF6/TERT1-Parental<br>(130/126) R1 | Ratio Standard Errors [%]:<br>OKF6/TERT1-Smoke/<br>OKF6/TERT1-Parental<br>(128/127) R2 | Ratio Variabilities [%]:<br>F13: OKF6/TERT1-<br>Smoke/<br>OKF6/TERT1-Parental<br>(130/126) R1 | Ratio Variabilities [%]:<br>F13: OKF6/TERT1-<br>Smoke/<br>OKF6/TERT1-Parental<br>(128/127) R2 | Ratio Counts: F13:<br>OKF6/TERT1-Smoke/<br>OKF6/TERT1-Parental<br>(130/126) R1 | Ratio Counts: F13:<br>OKF6/TERT1-Smoke/<br>OKF6/TERT1-Parental<br>(128/127) R2 | HPRD ID | Entrez Gene ID | Gene Name                                                           | Molecular Function                          | Primary Localization  | Molecular Class                     | Biological Process                                               | Domains             | Plasma Proteome Database |
|-------------|---------|-----------------------------------------------------------------------------|-------------------|------------|-------------------|------------|--------|----------------------------------------------------------|----------------------------------------------------------|----------------------------------------------------------------------------------------|----------------------------------------------------------------------------------------|-----------------------------------------------------------------------------------------------|-----------------------------------------------------------------------------------------------|--------------------------------------------------------------------------------|--------------------------------------------------------------------------------|---------|----------------|---------------------------------------------------------------------|---------------------------------------------|-----------------------|-------------------------------------|------------------------------------------------------------------|---------------------|--------------------------|
| UCHL5       | 51377   | ubiquitin carboxyl-terminal hydrolase isozyme L5 isoform 1                  | NP_057068.1       | 1          | 1                 | 9          | 18     | 2.06                                                     | 0.57                                                     |                                                                                        |                                                                                        |                                                                                               |                                                                                               | 1                                                                              | 1                                                                              | 10293   | 51377          | ubiquitin carboxyl-terminal hydrolase L5                            | Ubiquitin-specific protease activity        | Nucleus               | Ubiquitin proteasome system protein | Protein metabolism                                               | CC                  | Yes                      |
| ZBTB34      | 403341  | zinc finger and BTB domain-containing protein 34                            | NP_001092740.1    | 1          | 1                 | 1          | 1      | 2.04                                                     | 0.67                                                     |                                                                                        |                                                                                        |                                                                                               |                                                                                               | 1                                                                              | 1                                                                              | 19419   | 403341         | zinc finger and BTB domain containing 34                            | Transcription regulator activity            | Nucleus               | Transcription regulatory protein    | Transcription                                                    | BTB,ZNFC2           | Yes                      |
| ZFP91       | 80829   | E3 ubiquitin-protein ligase ZFP91 isoform 1                                 | NP_444251.1       | 2          | 1                 | 1          | 2      | 2.02                                                     | 1.66                                                     |                                                                                        |                                                                                        |                                                                                               |                                                                                               | 1                                                                              | 1                                                                              | 11700   | 80829          | zinc finger protein 91 homolog (mouse)                              | Transcription factor activity               | Nucleus               | Transcription factor                | Regulation of nucleobase, nucleotide and nucleic acid metabolism | CC,ZNFC2            | Yes                      |
| AKAP3       | 10566   | A-kinase anchor protein 3                                                   | NP_006413.3       | 1          | 1                 | 1          | 1      | 2.01                                                     | 0.69                                                     |                                                                                        |                                                                                        |                                                                                               |                                                                                               | 1                                                                              | 1                                                                              | 5256    | 10566          | A kinase (PKA) anchor protein 3                                     | Cytoskeletal anchoring activity             | Cytoplasm             | Anchor protein                      | Cell growth and/or maintenance                                   | -                   | Yes                      |
| LCP1        | 3936    | plastin-2                                                                   | NP_002289.2       | 1          | 8                 | 12         | 40     | 1.91                                                     | 2.25                                                     | 6.46                                                                                   | 6.14                                                                                   | 40.6                                                                                          | 45.9                                                                                          | 10                                                                             | 10                                                                             | 1082    | 3936           | lymphocyte cytosolic protein 1 (L-plastin)                          | Calcium ion binding                         | Cytoplasm             | Calcium binding protein             | Cell communication;Signal transduction                           | EF,CH               | Yes                      |
| PPP4R4      | 57718   | serine/threonine-protein phosphatase 4 regulatory subunit 4 isoform 1       | NP_478144.1       | 1          | 1                 | 1          | 2      | 1.87                                                     | 3.56                                                     |                                                                                        |                                                                                        |                                                                                               |                                                                                               | 1                                                                              | 1                                                                              | 13878   | 57718          | KIAA1622                                                            | Molecular function unknown                  | Cytoplasm             | Unclassified                        | Biological process unknown                                       | CC                  | No                       |
| CYBA        | 1535    | cytochrome b-245 light chain                                                | NP_000092.2       | 1          | 1                 | 1          | 1      | 1.86                                                     | 2.1                                                      |                                                                                        |                                                                                        |                                                                                               |                                                                                               | 1                                                                              | 1                                                                              | 1989    | 1535           | cytochrome b-245 alpha polypeptide                                  | Catalytic activity                          | Plasma membrane       | Enzyme; Oxidase                     | Metabolism;Energy pathways                                       | TM                  | Yes                      |
| GARNL3      | 84253   | GTPase-activating Rap/Ran-GAP domain-like protein 3 isoform a               | NP_115669.3       | 2          | 1                 | 1          | 1      | 1.85                                                     | 2.16                                                     |                                                                                        |                                                                                        |                                                                                               |                                                                                               | 1                                                                              | 1                                                                              | 13567   | 84253          | GTPase activating Rap/RanGAP domain-like 3                          | GTPase activator activity                   | -                     | GTPase activating protein           | Biological process unknown                                       | CNH                 | No                       |
| MCFD2       | 90411   | multiple coagulation factor deficiency protein 2 isoform A precursor        | NP_644808.1       | 3          | 1                 | 1          | 2      | 1.84                                                     | 3.42                                                     |                                                                                        |                                                                                        |                                                                                               |                                                                                               | 1                                                                              | 1                                                                              | 9693    | 90411          | multiple coagulation factor deficiency 2                            | Molecular function unknown                  | Extracellular         | Unclassified                        | Cell communication;Signal transduction                           | SP                  | Yes                      |
| ENG         | 2022    | endoglin isoform 1 precursor                                                | NP_001108225.1    | 3          | 1                 | 1          | 1      | 1.83                                                     | 2.2                                                      |                                                                                        |                                                                                        |                                                                                               |                                                                                               | 1                                                                              | 1                                                                              | 565     | 2022           | endoglin (Oster-Rendu-Weber syndrome 1)                             | Receptor activity                           | Plasma membrane       | Cell surface receptor               | Cell communication;Signal transduction                           | ZP;TM;RGD,SP        | Yes                      |
| HNRNPA1     | 3178    | heterogeneous nuclear ribonucleoprotein A1 isoform b                        | NP_112420.1       | 2          | 1                 | 20         | 67     | 1.8                                                      | 2.48                                                     |                                                                                        |                                                                                        |                                                                                               |                                                                                               | 1                                                                              | 1                                                                              | 1242    | 3178           | heterogeneous nuclear ribonucleoprotein A1                          | RNA binding                                 | Nucleus               | RNA binding protein                 | Regulation of nucleobase, nucleotide and nucleic acid metabolism | RRM                 | Yes                      |
| IL1B        | 3553    | interleukin-1 beta propeptide                                               | NP_000567.1       | 1          | 6                 | 6          | 12     | 1.8                                                      | 2.21                                                     | 13.86                                                                                  | 21.17                                                                                  | 60.6                                                                                          | 141.4                                                                                         | 5                                                                              | 5                                                                              | 985     | 3553           | interleukin 1, beta                                                 | Cytokine activity                           | Extracellular         | Cytokine                            | Immune response                                                  | IL1                 | Yes                      |
| BTBD16      | 118663  | BTB/POZ domain-containing protein 16                                        | NP_653188.2       | 1          | 1                 | 1          | 1      | 1.74                                                     | 2.21                                                     |                                                                                        |                                                                                        |                                                                                               |                                                                                               | 1                                                                              | 1                                                                              | 12594   | 118663         | chromosome 10 open reading frame 87                                 | Molecular function unknown                  | -                     | Unclassified                        | Biological process unknown                                       | BTB                 | No                       |
| CYP1A1      | 1543    | cytochrome P450 1A1                                                         | NP_000490.1       | 1          | 4                 | 4          | 16     | 1.65                                                     | 2.08                                                     | 13.22                                                                                  | 8.19                                                                                   | 68.3                                                                                          | 51                                                                                            | 8                                                                              | 8                                                                              | 148     | 1543           | cytochrome P450, family 1, subfamily A, polypeptide 1               | Catalytic activity                          | Endoplasmic reticulum | Enzyme; Hydroxylase                 | Metabolism;Energy pathways                                       | SP                  | Yes                      |
| KNDC1       | 85442   | protein very KIND                                                           | NP_689856.6       | 1          | 1                 | 1          | 1      | 1.65                                                     | 2.04                                                     |                                                                                        |                                                                                        |                                                                                               |                                                                                               | 1                                                                              | 1                                                                              | 13931   | 85442          | kinase non-catalytic C-lobe domain (KIND)containing 1               | Molecular function unknown                  | -                     | Unclassified                        | Biological process unknown                                       | CC;Ras;GEFN;Ras;GEF | No                       |
| MAN1A2      | 10905   | mannosyl-oligosaccharide 1,2-alpha-mannosidase 1B                           | NP_006690.1       | 1          | 1                 | 1          | 2      | 1.62                                                     | 2.19                                                     |                                                                                        |                                                                                        |                                                                                               |                                                                                               | 1                                                                              | 1                                                                              | 5067    | 10905          | mannosidase, alpha, class 1A, member 2                              | Hydrolase activity                          | Golgi apparatus       | Enzyme; Hydrolase                   | Metabolism;Energy pathways                                       | TM,CC               | Yes                      |
| KDEL2       | 143888  | KDEL motif-containing protein 2 precursor                                   | NP_714916.3       | 1          | 1                 | 1          | 1      | 1.61                                                     | 2.72                                                     |                                                                                        |                                                                                        |                                                                                               |                                                                                               | 1                                                                              | 1                                                                              | 13773   | 143888         | KDEL (Lys-Asp-Glu-Leu) containing 2                                 | Molecular function unknown                  | Extracellular         | Unclassified                        | Biological process unknown                                       | SP;KGF,LMN          | No                       |
| UBXN1       | 51035   | UBX domain-containing protein 1 isoform 1                                   | NP_056937.2       | 3          | 3                 | 3          | 5      | 1.58                                                     | 2.03                                                     | 11.26                                                                                  | 10.73                                                                                  | 25.5                                                                                          | 31.6                                                                                          | 2                                                                              | 2                                                                              | 11266   | 51035          | None                                                                | Ubiquitin binding                           | -                     | Ubiquitin proteasome system protein | Proteolysis and peptidolysis                                     | UBX,UBA,CC          | Yes                      |
| HBG1        | 3047    | hemoglobin subunit gamma-1                                                  | NP_000550.2       | 3          | 2                 | 3          | 18     | 1.57                                                     | 3.21                                                     |                                                                                        |                                                                                        |                                                                                               |                                                                                               | 1                                                                              | 1                                                                              | 789     | 3047           | hemoglobin, gamma 1                                                 | Transporter activity                        | -                     | Transport/cargo protein             | Transport                                                        | -                   | Yes                      |
| ABC8        | 11194   | ATP-binding cassette sub-family B member 8, mitochondrial isoform a         | NP_001269220.1    | 4          | 1                 | 1          | 2      | 1.56                                                     | 2.3                                                      |                                                                                        |                                                                                        |                                                                                               |                                                                                               | 1                                                                              | 1                                                                              | 10400   | 11194          | ATP-binding cassette, sub-family B (MDR/TAP), member 8              | Transporter activity                        | Mitochondrion         | Transport/cargo protein             | Transport                                                        | AAA                 | Yes                      |
| SLC2A6      | 11182   | solute carrier family 2, facilitated glucose transporter member 6 isoform 1 | NP_060055.2       | 2          | 1                 | 1          | 1      | 1.56                                                     | 2.04                                                     |                                                                                        |                                                                                        |                                                                                               |                                                                                               | 1                                                                              | 1                                                                              | 6010    | 11182          | solute carrier family 2 (facilitated glucosetransporter), member 6  | Auxiliary transport protein activity        | Plasma membrane       | Membrane transport protein          | Transport                                                        | TM                  | Yes                      |
| CORO1A      | 11151   | coronin-1A                                                                  | NP_090055.1       | 1          | 13                | 13         | 28     | 1.5                                                      | 2.79                                                     | 5.86                                                                                   | 3.14                                                                                   | 33.9                                                                                          | 34.9                                                                                          | 14                                                                             | 15                                                                             | 5414    | 11151          | coronin, actin binding protein, 1A                                  | Cytoskeletal protein binding                | Cytoplasm             | Cytoskeletal associated protein     | Cell growth and/or maintenance                                   | CC,WD40             | Yes                      |
| COL16A1     | 1307    | collagen alpha-1(XVI) chain precursor                                       | NP_001847.3       | 1          | 1                 | 1          | 1      | 1.48                                                     | 4.16                                                     |                                                                                        |                                                                                        |                                                                                               |                                                                                               | 1                                                                              | 1                                                                              | 381     | 1307           | collagen, type XVI, alpha 1                                         | Extracellular matrix structural constituent | Extracellular         | Extracellular matrix protein        | Cell growth and/or maintenance                                   | TSPN;COLL,SP        | Yes                      |
| POLG        | 5428    | DNA polymerase subunit gamma-1                                              | NP_002684.1       | 1          | 1                 | 1          | 2      | 1.47                                                     | 3.13                                                     |                                                                                        |                                                                                        |                                                                                               |                                                                                               | 1                                                                              | 1                                                                              | 1438    | 5428           | polymerase (DNA directed), gamma                                    | DNA-directed DNA polymerase activity        | Mitochondrion         | DNA polymerase                      | Regulation of nucleobase, nucleotide and nucleic acid metabolism | CC                  | Yes                      |
| GLRX        | 2745    | glutaredoxin-1                                                              | NP_002055.1       | 1          | 2                 | 2          | 3      | 1.45                                                     | 2.35                                                     | 35.86                                                                                  | 21.52                                                                                  | 85                                                                                            | 81.7                                                                                          | 2                                                                              | 2                                                                              | 2707    | 2745           | glutaredoxin (thioredoxin)                                          | Oxidoreductase activity                     | Cytoplasm             | Enzyme; Oxidoreductase              | Metabolism;Energy pathways                                       | -                   | Yes                      |
| MRPL33      | 9553    | 39S ribosomal protein L33, mitochondrial isoform a                          | NP_004882.1       | 1          | 1                 | 1          | 1      | 1.44                                                     | 3.02                                                     |                                                                                        |                                                                                        |                                                                                               |                                                                                               | 1                                                                              | 1                                                                              | 14753   | 9553           | mitochondrial ribosomal protein L33                                 | Structural constituent of ribosome          | Mitochondrion         | Ribosomal subunit                   | Protein metabolism                                               | SP                  | Yes                      |
| BCCIP       | 56647   | BRC2 and CDKN1A-interacting protein isoform BCCIPbeta                       | NP_510868.1       | 3          | 9                 | 9          | 29     | 1.42                                                     | 2.44                                                     | 4.93                                                                                   | 5.53                                                                                   | 26.6                                                                                          | 53.8                                                                                          | 14                                                                             | 14                                                                             | 16542   | 56647          | BRC2 and CDKN1A interacting protein                                 | Peptide binding                             | Nucleus               | Cell cycle control protein          | Cell growth and/or maintenance;Signal transduction;DNA repair    | CC,NLS              | No                       |
| MTTP        | 4547    | microsomal triglyceride transfer protein large subunit isoform 2            | NP_001287714.1    | 2          | 1                 | 1          | 2      | 1.4                                                      | 2.85                                                     |                                                                                        |                                                                                        |                                                                                               |                                                                                               | 1                                                                              | 1                                                                              | 1144    | 4547           | microsomal triglyceride transfer protein (large polypeptide, 88kDa) | Transporter activity                        | Cytoplasm             | Transport/cargo protein             | Transport                                                        | SP                  | Yes                      |

Supplementary Table S1. List of quantified proteins in OKF6/TERT1-Smoke cells  
 Raingopaln *et al.*, 2017. Role of protein kinase N2 (PKN2) in cigarette smoke-mediated oncogenic transformation of oral cells

| Gene Symbol | Gene ID | Protein Description                                                     | Protein Accession | # Proteins | # Unique Peptides | # Peptides | # PSMs | OKF6/TERT1-Smoke/<br>OKF6/TERT1-Parental<br>(130/126) R1 | OKF6/TERT1-Smoke/<br>OKF6/TERT1-Parental<br>(128/127) R2 | Ratio Standard Errors [%]:<br>OKF6/TERT1-Smoke/<br>OKF6/TERT1-Parental<br>(130/126) R1 | Ratio Standard Errors [%]:<br>OKF6/TERT1-Smoke/<br>OKF6/TERT1-Parental<br>(128/127) R2 | Ratio Variabilities [%]:<br>F13: OKF6/TERT1-<br>Smoke/<br>OKF6/TERT1-Parental<br>(130/126) R1 | Ratio Variabilities [%]:<br>F13: OKF6/TERT1-<br>Smoke/<br>OKF6/TERT1-Parental<br>(128/127) R2 | Ratio Counts: F13:<br>OKF6/TERT1-Smoke/<br>OKF6/TERT1-Parental<br>(130/126) R1 | Ratio Counts: F13:<br>OKF6/TERT1-Smoke/<br>OKF6/TERT1-Parental<br>(128/127) R2 | HPRD ID | Entrez Gene ID | Gene Name                                                            | Molecular Function                           | Primary Localization   | Molecular Class                     | Biological Process                                                           | Domains            | Plasma Proteome Database |
|-------------|---------|-------------------------------------------------------------------------|-------------------|------------|-------------------|------------|--------|----------------------------------------------------------|----------------------------------------------------------|----------------------------------------------------------------------------------------|----------------------------------------------------------------------------------------|-----------------------------------------------------------------------------------------------|-----------------------------------------------------------------------------------------------|--------------------------------------------------------------------------------|--------------------------------------------------------------------------------|---------|----------------|----------------------------------------------------------------------|----------------------------------------------|------------------------|-------------------------------------|------------------------------------------------------------------------------|--------------------|--------------------------|
| ANKRD11     | 29123   | ankyrin repeat domain-containing protein 11                             | NP_001243111.1    | 1          | 1                 | 1          | 2      | 1.4                                                      | 2.26                                                     |                                                                                        |                                                                                        |                                                                                               |                                                                                               | 1                                                                              | 1                                                                              | 12456   | 29123          | ankyrin repeat domain 11                                             | Transcription regulator activity             | Nucleus                | Transcription regulatory protein    | Regulation of nucleobase, nucleoside, nucleotide and nucleic acid metabolism | ANKCC              | Yes                      |
| GSTM1       | 2944    | glutathione S-transferase Mu 1 isoform 1                                | NP_000552.2       | 1          | 1                 | 1          | 2      | 1.39                                                     | 2.6                                                      |                                                                                        |                                                                                        |                                                                                               |                                                                                               | 1                                                                              | 1                                                                              | 707     | 2944           | glutathione S-transferase M1                                         | Glutathione transferase activity             | Cytoplasm              | Enzyme: Glutathione transferase     | Energy pathways;Metabolism;Xenobiotic metabolism                             | -                  | Yes                      |
| ACAD10      | 80724   | acyl-CoA dehydrogenase family member 10 isoform a                       | NP_001130010.1    | 2          | 1                 | 1          | 2      | 1.39                                                     | 2.58                                                     |                                                                                        |                                                                                        |                                                                                               |                                                                                               | 1                                                                              | 1                                                                              | 10625   | 80724          | acyl-Coenzyme A dehydrogenase family, member10                       | Catalytic activity                           | -                      | Enzyme: Dehydrogenase               | Metabolism;Energy pathways                                                   | -                  | No                       |
| KLF5        | 688     | Kruppel-like factor 5 isoform 1                                         | NP_001721.2       | 2          | 2                 | 2          | 4      | 1.38                                                     | 2.08                                                     | 27.79                                                                                  | 7.99                                                                                   | 58.6                                                                                          | 23.9                                                                                          | 2                                                                              | 2                                                                              | 4212    | 688            | Kruppel-like factor 5 (mesenchymal)                                  | Transcription factor activity                | Nucleus                | Transcription factor                | Regulation of nucleobase, nucleoside, nucleotide and nucleic acid metabolism | ZNFC2              | Yes                      |
| UBAC1       | 10422   | ubiquitin-associated domain-containing protein 1                        | NP_057256.2       | 1          | 2                 | 2          | 5      | 1.37                                                     | 3.66                                                     | 8.59                                                                                   | 5.37                                                                                   | 20.7                                                                                          | 35                                                                                            | 3                                                                              | 3                                                                              | 12170   | 10422          | ubiquitin associated domain containing 1                             | Molecular function unknown                   | Cytoplasm              | Unclassified                        | Cell growth and/or maintenance                                               | UBA;STH            | No                       |
| SEC11C      | 90701   | signal peptidase complex catalytic subunit SEC11C isoform 1             | NP_150596.1       | 2          | 2                 | 2          | 4      | 1.35                                                     | 2.25                                                     | 6.44                                                                                   | 23.17                                                                                  | 12.3                                                                                          | 84.9                                                                                          | 2                                                                              | 2                                                                              | 15310   | 90701          | SEC11-like 3 (S. cerevisiae)                                         | Aminopeptidase activity                      | Microsome              | Aminopeptidase                      | Protein metabolism                                                           | TM                 | Yes                      |
| USP48       | 84196   | ubiquitin carboxyl-terminal hydrolase 48 isoform a                      | NP_115612.4       | 1          | 1                 | 1          | 2      | 1.34                                                     | 2.74                                                     |                                                                                        |                                                                                        |                                                                                               |                                                                                               | 1                                                                              | 1                                                                              | 15637   | 84196          | ubiquitin specific protease 48                                       | Ubiquitin-specific protease activity         | Nucleus                | Ubiquitin proteasome system protein | Protein metabolism                                                           | CC;UCH;DUSP;UBQ;TM | Yes                      |
| CD40        | 958     | tumor necrosis factor receptor superfamily member 5 isoform 1 precursor | NP_001241.1       | 3          | 1                 | 1          | 1      | 1.34                                                     | 2.36                                                     |                                                                                        |                                                                                        |                                                                                               |                                                                                               | 1                                                                              | 1                                                                              | 178     | 958            | CD40 antigen (TNF receptor superfamily member 5)                     | Receptor activity                            | Cytoplasm              | Cell surface receptor               | Cell communication;Signal transduction                                       | TM;TNFR;SP         | Yes                      |
| FAM21C      | 253725  | WASH complex subunit FAM21C isoform 1                                   | NP_056077.2       | 3          | 1                 | 16         | 32     | 1.27                                                     | 2.54                                                     |                                                                                        |                                                                                        |                                                                                               |                                                                                               | 1                                                                              | 1                                                                              | 11094   | 253725         | family with sequence similarity 21, member C                         | Molecular function unknown                   | Nucleus;Cytoplasm      | Unclassified                        | Biological processes unknown                                                 | -                  | No                       |
| FHL1        | 2273    | four and a half LIM domains protein 1 isoform 1                         | NP_001153174.1    | 5          | 1                 | 1          | 2      | 1.27                                                     | 2.15                                                     |                                                                                        |                                                                                        |                                                                                               |                                                                                               | 1                                                                              | 1                                                                              | 2157    | 2273           | four and a half LIM domains 1                                        | Molecular function unknown                   | Cytoplasm              | Unclassified                        | Cell growth and/or maintenance                                               | LIM                | Yes                      |
| SLC12A7     | 10723   | solute carrier family 12 member 7                                       | NP_006589.2       | 1          | 2                 | 2          | 4      | 1.26                                                     | 2.11                                                     | 28.76                                                                                  | 7.24                                                                                   | 54.9                                                                                          | 21.9                                                                                          | 2                                                                              | 2                                                                              | 9221    | 10723          | solute carrier family 12 (potassium/chloride transporters), member 7 | Auxiliary transport protein activity         | Plasma membrane        | Membrane transport protein          | Transport                                                                    | TM                 | Yes                      |
| HMGAI       | 3159    | high mobility group protein HMG-1HMG-Y isoform a                        | NP_665906.1       | 2          | 3                 | 3          | 10     | 1.23                                                     | 2.51                                                     | 1.66                                                                                   | 2.78                                                                                   | 4.6                                                                                           | 15.7                                                                                          | 5                                                                              | 5                                                                              | 2829    | 3159           | high mobility group AT-hook 1                                        | DNA binding                                  | Nucleus                | DNA binding protein                 | Regulation of nucleobase, nucleoside, nucleotide and nucleic acid metabolism | AT_hook            | No                       |
| BCL2L1      | 598     | bcl-2-like protein 1 isoform 1                                          | NP_612815.1       | 2          | 2                 | 2          | 5      | 1.22                                                     | 2.16                                                     | 15.79                                                                                  | 10.62                                                                                  | 34.4                                                                                          | 41.3                                                                                          | 3                                                                              | 3                                                                              | 2497    | 598            | BCL2-like 1                                                          | Receptor signaling complex scaffold activity | Mitochondrial membrane | Adapter molecule                    | Apoptosis                                                                    | TM;BH4;BCL         | Yes                      |
| SOD2        | 6648    | superoxide dismutase [Mn], mitochondrial isoform A precursor            | NP_000627.2       | 2          | 2                 | 2          | 15     | 1.22                                                     | 2.14                                                     | 3.44                                                                                   | 2.38                                                                                   | 11.9                                                                                          | 14.5                                                                                          | 8                                                                              | 8                                                                              | 938     | 6648           | superoxide dismutase 2, mitochondrial                                | Superoxide dismutase activity                | Mitochondrion          | Enzyme: Superoxide dismutase        | Cell proliferation;Anti-apoptosis;Cell growth and/or maintenance             | -                  | Yes                      |
| GRPEL2      | 134266  | grpE protein homolog 2, mitochondrial precursor                         | NP_689620.2       | 1          | 1                 | 1          | 2      | 1.2                                                      | 2.99                                                     |                                                                                        |                                                                                        |                                                                                               |                                                                                               | 1                                                                              | 1                                                                              | 17079   | 134266         | GrpE-like 2, mitochondrial (E. coli)                                 | Chaperone activity                           | Mitochondrion          | Chaperone                           | Protein metabolism                                                           | CC                 | No                       |
| FUS         | 2521    | RNA-binding protein FUS isoform 1                                       | NP_004951.1       | 3          | 5                 | 7          | 25     | 1.2                                                      | 2.05                                                     | 4.55                                                                                   | 1.07                                                                                   | 15.5                                                                                          | 6.2                                                                                           | 8                                                                              | 8                                                                              | 660     | 2521           | fusion (involved in t(12;16) in malignant liposarcoma)               | Nucleocytoplasmic transporter activity       | Nucleus                | RNA binding protein                 | RNA localization                                                             | RRM;ZnF_RBZ        | Yes                      |
| HELZ        | 9931    | probable helicase with zinc finger domain                               | NP_055692.2       | 1          | 2                 | 2          | 3      | 1.19                                                     | 2.22                                                     | 1.68                                                                                   | 10.87                                                                                  | 3.5                                                                                           | 43.6                                                                                          | 3                                                                              | 3                                                                              | 10452   | 9931           | helicase with zinc finger                                            | Helicase activity                            | Nucleus                | RNA helicase                        | Regulation of nucleobase, nucleoside, nucleotide and nucleic acid metabolism | ZnF_C3H1           | Yes                      |
| POLR3C      | 10623   | DNA-directed RNA polymerase III subunit RPC3 isoform 2                  | NP_001290385.1    | 2          | 1                 | 1          | 6      | 1.17                                                     | 2.3                                                      | 5.11                                                                                   | 15.66                                                                                  | 10.4                                                                                          | 68.9                                                                                          | 3                                                                              | 3                                                                              | 17880   | 10623          | polymerase (RNA) III (DNA directed) polypeptide C (62kD)             | Transcription regulator activity             | Nucleus                | Transcription regulatory protein    | Regulation of nucleobase, nucleoside, nucleotide and nucleic acid metabolism | -                  | No                       |
| HM13        | 81502   | minor histocompatibility antigen H13 isoform 1                          | NP_110416.1       | 4          | 4                 | 4          | 26     | 1.16                                                     | 2.18                                                     | 7.29                                                                                   | 6.26                                                                                   | 31.1                                                                                          | 52.4                                                                                          | 13                                                                             | 13                                                                             | 6166    | 81502          | histocompatibility (minor) H13                                       | Peptidase activity                           | Integral to membrane   | Protease                            | Immune response                                                              | TM                 | Yes                      |
| TNFRSF6B    | 8771    | tumor necrosis factor receptor superfamily member 6B precursor          | NP_003814.1       | 1          | 2                 | 2          | 7      | 1.15                                                     | 2.79                                                     | 3.26                                                                                   | 18.92                                                                                  | 7.5                                                                                           | 143.5                                                                                         | 4                                                                              | 4                                                                              | 4527    | 8771           | tumor necrosis factor receptor superfamily, member 6b, decoy         | Cytokine activity;Protein binding            | Extracellular          | Secreted polypeptide;Cytokine       | Immune response;Anti-apoptosis;Apoptosis                                     | TNFR;SP            | Yes                      |
| MTIG        | 4495    | metallothionein-1G isoform 2                                            | NP_001288196.1    | 6          | 1                 | 1          | 1      | 1.13                                                     | 2.57                                                     |                                                                                        |                                                                                        |                                                                                               |                                                                                               | 1                                                                              | 1                                                                              | 11827   | 4495           | metallothionein 1G                                                   | Molecular function unknown                   | -                      | Unclassified                        | Biological processes unknown                                                 | -                  | No                       |
| KIAA1429    | 25962   | protein virlizer homolog isoform 1                                      | NP_056311.2       | 2          | 2                 | 2          | 4      | 1.13                                                     | 2.06                                                     | 9.26                                                                                   | 22.78                                                                                  | 14.8                                                                                          | 74.4                                                                                          | 2                                                                              | 2                                                                              | 10889   | 25962          | None                                                                 | Molecular function unknown                   | Nucleus;Cytoplasm      | Unclassified                        | Biological processes unknown                                                 | -                  | Yes                      |
| SRBD1       | 55133   | S1 RNA-binding domain-containing protein 1                              | NP_060549.4       | 1          | 1                 | 1          | 1      | 1.12                                                     | 2.36                                                     |                                                                                        |                                                                                        |                                                                                               |                                                                                               | 1                                                                              | 1                                                                              | 7669    | 55133          | None                                                                 | Molecular function unknown                   | Cytoplasm              | Unclassified                        | Biological processes unknown                                                 | CC;HHHS1           | No                       |
| SI          | 6476    | sucrase-isomaltase, intestinal                                          | NP_001032.2       | 1          | 2                 | 2          | 46     | 1.12                                                     | 2.05                                                     | 3.61                                                                                   | 3.01                                                                                   | 19.7                                                                                          | 30.4                                                                                          | 23                                                                             | 23                                                                             | 1962    | 6476           | sucrase-isomaltase (alpha-glucosidase)                               | Glucosidase activity                         | Plasma membrane        | Enzyme: Glucosidase                 | Metabolism;Energy pathways                                                   | Trefal;TM          | Yes                      |
| NIN1        | 4814    | ninjurin-1                                                              | NP_004139.2       | 1          | 1                 | 1          | 6      | 1.1                                                      | 2.78                                                     | 31                                                                                     | 2.97                                                                                   | 64.6                                                                                          | 14.4                                                                                          | 3                                                                              | 3                                                                              | 3639    | 4814           | ninjurin 1                                                           | Cell adhesion molecule activity              | Plasma membrane        | Adhesion molecule                   | Cell communication;Signal transduction                                       | TM                 | No                       |

Supplementary Table S1. List of quantified proteins in OKF6/TERT1-Smoke cells  
 Rajanathan *et al.*, 2017. Role of protein kinase N2 (PKN2) in cigarette smoke-mediated oncogenic transformation of oral cells

| Gene Symbol | Gene ID | Protein Description                                                  | Protein Accession | # Proteins | # Unique Peptides | # Peptides | # PSMs | OKF6/TERT1-Smoke/<br>OKF6/TERT1-Parental<br>(130/126) R1 | OKF6/TERT1-Smoke/<br>OKF6/TERT1-Parental<br>(128/127) R2 | Ratio Standard Errors [%]:<br>OKF6/TERT1-Smoke/<br>OKF6/TERT1-Parental<br>(130/126) R1 | Ratio Standard Errors [%]:<br>OKF6/TERT1-Smoke/<br>OKF6/TERT1-Parental<br>(128/127) R2 | Ratio Variabilities [%]:<br>F13: OKF6/TERT1-<br>Smoke/<br>OKF6/TERT1-Parental<br>(130/126) R1 | Ratio Variabilities [%]:<br>F13: OKF6/TERT1-<br>Smoke/<br>OKF6/TERT1-Parental<br>(128/127) R2 | Ratio Counts: F13:<br>OKF6/TERT1-Smoke/<br>OKF6/TERT1-Parental<br>(130/126) R1 | Ratio Counts: F13:<br>OKF6/TERT1-Smoke/<br>OKF6/TERT1-Parental<br>(128/127) R2 | HPRD ID | Entrez Gene ID | Gene Name                                                                 | Molecular Function                           | Primary Localization      | Molecular Class                  | Biological Process                                                           | Domains         | Plasma Proteome Database |
|-------------|---------|----------------------------------------------------------------------|-------------------|------------|-------------------|------------|--------|----------------------------------------------------------|----------------------------------------------------------|----------------------------------------------------------------------------------------|----------------------------------------------------------------------------------------|-----------------------------------------------------------------------------------------------|-----------------------------------------------------------------------------------------------|--------------------------------------------------------------------------------|--------------------------------------------------------------------------------|---------|----------------|---------------------------------------------------------------------------|----------------------------------------------|---------------------------|----------------------------------|------------------------------------------------------------------------------|-----------------|--------------------------|
| HNRNPA0     | 10949   | heterogeneous nuclear ribonucleoprotein A0                           | NP_006796.1       | 1          | 10                | 12         | 35     | 1.07                                                     | 2                                                        | 5.62                                                                                   | 5.78                                                                                   | 24.3                                                                                          | 48.8                                                                                          | 16                                                                             | 16                                                                             | 17112   | 10949          | heterogeneous nuclear ribonucleoprotein A0                                | RNA binding                                  | Nucleus                   | Ribonucleoprotein                | Regulation of nucleobase, nucleoside, nucleotide and nucleic acid metabolism | RRM             | Yes                      |
| KRT10       | 3858    | keratin, type I cytoskeletal 10                                      | NP_000412.3       | 5          | 14                | 20         | 80     | 1.06                                                     | 2.05                                                     | 4.07                                                                                   | 5.71                                                                                   | 21.4                                                                                          | 62.6                                                                                          | 24                                                                             | 24                                                                             | 1021    | 3858           | keratin 10 (epidermolytic hyperkeratosis;keratosis palmaris et plantaris) | Structural molecule activity                 | Cytoplasm                 | Structural protein               | Cell growth and/or maintenance                                               | CC              | Yes                      |
| KRT1        | 889     | krev interaction trapped protein 1 isoform 1                         | NP_004903.2       | 2          | 1                 | 1          | 2      | 1.05                                                     | 2.71                                                     |                                                                                        |                                                                                        |                                                                                               |                                                                                               | 1                                                                              | 1                                                                              | 5020    | 889            | KRT1, ankyrin repeat containing                                           | Molecular function unknown                   | Tubulin                   | Unclassified                     | Signal transduction                                                          | ANK,B41,NLS     | Yes                      |
| ANP32B      | 10541   | acidic leucine-rich nuclear phosphoprotein 32 family member B        | NP_006392.1       | 1          | 4                 | 7          | 46     | 1.05                                                     | 2.42                                                     | 19.29                                                                                  | 10.68                                                                                  | 71.2                                                                                          | 97.7                                                                                          | 10                                                                             | 10                                                                             | 9803    | 10541          | acidic (leucine-rich) nuclear phosphoprotein32 family, member B           | Molecular function unknown                   | Nucleus                   | Unclassified                     | Biological process unknown                                                   | LRR,NLS         | Yes                      |
| KRT9        | 3857    | keratin, type I cytoskeletal 9                                       | NP_000217.2       | 1          | 9                 | 10         | 22     | 1.04                                                     | 3.64                                                     | 12.53                                                                                  | 1.92                                                                                   | 40.8                                                                                          | 21.2                                                                                          | 9                                                                              | 9                                                                              | 6351    | 3857           | keratin 9 (epidermolytic palmoplantar/keratoderma)                        | Structural molecule activity                 | Cytoplasm                 | Structural protein               | Cell growth and/or maintenance                                               | CC              | Yes                      |
| SHANK3      | 85358   | SH3 and multiple ankyrin repeat domains protein 3                    | NP_277052.1       | 1          | 1                 | 1          | 1      | 1.02                                                     | 2.38                                                     |                                                                                        |                                                                                        |                                                                                               |                                                                                               | 1                                                                              | 1                                                                              | 18979   | 85358          | SH3 and multiple ankyrin repeat domains 3                                 | Receptor signaling complex scaffold activity | Dendrite                  | Cytoskeletal associated protein  | Signal transduction                                                          | ANK,SH3,PDZ,SAM | No                       |
| P3H3        | 10536   | prolyl 2-hydroxylase 3 precursor                                     | NP_055077.2       | 1          | 3                 | 4          | 8      | 1.02                                                     | 2.11                                                     | 1.33                                                                                   | 11.47                                                                                  | 2.7                                                                                           | 51.3                                                                                          | 4                                                                              | 4                                                                              |         |                |                                                                           |                                              |                           |                                  |                                                                              |                 |                          |
| LSM5        | 23658   | U6 snRNA-associated Sm-like protein LSM5 isoform a                   | NP_036454.1       | 2          | 1                 | 1          | 2      | 0.98                                                     | 2.1                                                      |                                                                                        |                                                                                        |                                                                                               |                                                                                               | 1                                                                              | 1                                                                              | 6285    | 23658          | LSM5 homolog, U6 small nuclear RNA associated(S. cerevisiae)              | RNA binding                                  | Cytoplasm                 | RNA binding protein              | Regulation of nucleobase, nucleoside, nucleotide and nucleic acid metabolism | SM              | Yes                      |
| GIT2        | 9815    | ARF GTPase-activating protein GIT2 isoform 1                         | NP_476510.1       | 6          | 2                 | 4          | 6      | 0.97                                                     | 2.16                                                     |                                                                                        |                                                                                        |                                                                                               |                                                                                               | 1                                                                              | 1                                                                              | 9779    | 9815           | G protein-coupled receptor kinase interactor 2                            | GTPase activator activity                    | Nucleus                   | GTPase activating protein        | Cell communication;Signal transduction                                       | CC,ARFGAP       | Yes                      |
| PRSS1       | 5644    | trypsin-1 preproprotein                                              | NP_002760.1       | 5          | 2                 | 2          | 54     | 0.95                                                     | 3.61                                                     | 13.73                                                                                  | 8.07                                                                                   | 77.6                                                                                          | 312.9                                                                                         | 28                                                                             | 28                                                                             | 2039    | 5644           | protease, serine, 1 (trypsin 1)                                           | Serine-type peptidase activity               | Extracellular             | Serine protease                  | Protein metabolism                                                           | TRYPSIN,SP      | Yes                      |
| THGIL       | 54974   | probable tRNA(His) guanylyltransferase                               | NP_060342.2       | 1          | 1                 | 1          | 4      | 0.95                                                     | 2.03                                                     | 27.8                                                                                   | 9.61                                                                                   | 38.6                                                                                          | 28.1                                                                                          | 2                                                                              | 2                                                                              | 13726   | 54974          | None                                                                      | Molecular function unknown                   | Cytoplasm                 | Cell cycle control protein       | Cell growth and/or maintenance                                               | -               | No                       |
| MAP2K4      | 6416    | dual specificity mitogen-activated protein kinase kinase 4 isoform 2 | NP_001268364.1    | 2          | 4                 | 4          | 4      | 0.94                                                     | 2.31                                                     | 19.9                                                                                   | 30.03                                                                                  | 33.1                                                                                          | 180.2                                                                                         | 3                                                                              | 3                                                                              | 3213    | 6416           | mitogen-activated protein kinase kinase 4                                 | Protein threonine/tyrosine kinase activity   | Cytoplasm;Plasma membrane | Dual specificity kinase          | Cell communication;Signal transduction                                       | S_T_Y_Kinase    | Yes                      |
| KLHDC10     | 23008   | kelch domain-containing protein 10                                   | NP_055812.1       | 1          | 2                 | 2          | 3      | 0.93                                                     | 2.2                                                      |                                                                                        |                                                                                        |                                                                                               |                                                                                               | 1                                                                              | 1                                                                              | 17182   | 23008          | None                                                                      | Molecular function unknown                   | -                         | Unclassified                     | Biological process unknown                                                   | KELCH           | No                       |
| KRT2        | 3849    | keratin, type II cytoskeletal 2 epidermal                            | NP_000414.2       | 1          | 8                 | 17         | 177    | 0.93                                                     | 2.07                                                     | 6.92                                                                                   | 2.65                                                                                   | 17.2                                                                                          | 14.6                                                                                          | 7                                                                              | 7                                                                              | 2560    | 3849           | keratin 2A (epidermal ichthyosis hystrix of Siemsen)                      | Cytoskeletal protein binding                 | Cytoplasm                 | Cytoskeletal associated protein  | Cell growth and/or maintenance                                               | CC              | Yes                      |
| KRT1        | 3848    | keratin, type II cytoskeletal 1                                      | NP_006112.3       | 1          | 17                | 19         | 58     | 0.92                                                     | 2.38                                                     | 2.9                                                                                    | 4.02                                                                                   | 14.2                                                                                          | 54                                                                                            | 28                                                                             | 28                                                                             | 763     | 3848           | keratin 1 (epidermolytic hyperkeratosis)                                  | Structural molecule activity                 | Plasma membrane           | Structural protein               | Cell growth and/or maintenance                                               | CC              | Yes                      |
| HNRNPA3     | 220988  | heterogeneous nuclear ribonucleoprotein A3                           | NP_919223.1       | 1          | 13                | 16         | 36     | 0.9                                                      | 2.42                                                     | 10.31                                                                                  | 5.27                                                                                   | 40.9                                                                                          | 58.4                                                                                          | 18                                                                             | 18                                                                             | 5644    | 220988         | heterogeneous nuclear ribonucleoprotein A3                                | RNA binding                                  | Nucleus                   | Ribonucleoprotein                | Regulation of nucleobase, nucleoside, nucleotide and nucleic acid metabolism | RRM,NES         | Yes                      |
| SEPHS1      | 22929   | selenide, water dikinase 1 isoform 1                                 | NP_036379.2       | 3          | 2                 | 2          | 2      | 0.88                                                     | 2.01                                                     | 19.5                                                                                   | 27.71                                                                                  | 24.6                                                                                          | 92.5                                                                                          | 2                                                                              | 2                                                                              | 2944    | 22929          | selenophosphate synthetase 1                                              | ATP binding                                  | -                         | Enzyme; Synthase                 | Metabolism;Energy pathways                                                   | -               | Yes                      |
| ADIPOR1     | 51094   | adiponectin receptor protein 1                                       | NP_057083.2       | 1          | 2                 | 2          | 3      | 0.87                                                     | 2.4                                                      |                                                                                        |                                                                                        |                                                                                               |                                                                                               | 1                                                                              | 1                                                                              | 6402    | 51094          | adiponectin receptor 1                                                    | Protein-hormone receptor activity            | Plasma membrane           | Integral membrane protein        | Metabolism;Energy pathways;Fatty acid metabolism                             | TM              | Yes                      |
| DCAF7       | 10238   | DDB1- and CUL4-associated factor 7                                   | NP_005819.3       | 1          | 1                 | 1          | 2      | 0.85                                                     | 2.57                                                     |                                                                                        |                                                                                        |                                                                                               |                                                                                               | 1                                                                              | 1                                                                              | 9340    | 10238          | WD repeat domain 68                                                       | Molecular function unknown                   | Cytoplasm                 | Unclassified                     | Biological process unknown;Signal transduction                               | WD40            | Yes                      |
| FGFR1OP     | 11116   | FGFR1 oncogene partner isoform a                                     | NP_008976.1       | 3          | 2                 | 2          | 3      | 0.85                                                     | 2.43                                                     |                                                                                        |                                                                                        |                                                                                               |                                                                                               | 1                                                                              | 1                                                                              | 10392   | 11116          | FGFR1 oncogene partner                                                    | Molecular function unknown                   | -                         | Unclassified                     | Cell growth and/or maintenance                                               | LISH            | No                       |
| ANKDD1A     | 348094  | ankyrin repeat and death domain-containing protein 1A                | NP_874362.3       | 1          | 1                 | 1          | 2      | 0.85                                                     | 2.12                                                     |                                                                                        |                                                                                        |                                                                                               |                                                                                               | 1                                                                              | 1                                                                              | 14178   | 348094         | None                                                                      | Molecular function unknown                   | -                         | Unclassified                     | Biological process unknown                                                   | ANK,DEATH       | No                       |
| MMP3        | 4314    | stromelysin-1 preproprotein                                          | NP_002413.1       | 1          | 1                 | 1          | 1      | 0.84                                                     | 2.02                                                     |                                                                                        |                                                                                        |                                                                                               |                                                                                               | 1                                                                              | 1                                                                              | 1703    | 4314           | matrix metalloproteinase 3 (stromelysin 1;progelatinase)                  | Metalloproteinase activity                   | Extracellular             | Metalloprotease                  | Protein metabolism                                                           | ZnMc;HX,SP      | Yes                      |
| HNRNPA1     | 3178    | heterogeneous nuclear ribonucleoprotein A1 isoform a                 | NP_002127.1       | 2          | 1                 | 20         | 104    | 0.83                                                     | 3.77                                                     | 24.67                                                                                  | 1.68                                                                                   | 29.6                                                                                          | 9                                                                                             | 2                                                                              | 2                                                                              | 1242    | 3178           | heterogeneous nuclear ribonucleoprotein A1                                | RNA binding                                  | Nucleus                   | RNA binding protein              | Regulation of nucleobase, nucleoside, nucleotide and nucleic acid metabolism | RRM             | Yes                      |
| RBBP4       | 5928    | histone-binding protein RBBP4 isoform a                              | NP_005601.1       | 3          | 3                 | 9          | 25     | 0.83                                                     | 2.07                                                     | 41.15                                                                                  | 23.69                                                                                  | 77.3                                                                                          | 127.2                                                                                         | 4                                                                              | 4                                                                              | 4232    | 5928           | retinoblastoma binding protein 4                                          | Transcription regulator activity             | Nucleus                   | Transcription regulatory protein | Regulation of nucleobase, nucleoside, nucleotide and nucleic acid metabolism | WD40            | Yes                      |
| PDSS1       | 23590   | decaprenyl-diphosphate synthase subunit 1                            | NP_055132.2       | 1          | 1                 | 1          | 2      | 0.82                                                     | 2.24                                                     |                                                                                        |                                                                                        |                                                                                               |                                                                                               | 1                                                                              | 1                                                                              | 9591    | 23590          | trans-prenyltransferase                                                   | Transferase activity                         | Endoplasmic reticulum     | Enzyme; Transferase              | Metabolism;Energy pathways                                                   | -               | No                       |
| ANAPC2      | 29882   | anaphase-promoting complex subunit 2                                 | NP_037498.1       | 1          | 1                 | 1          | 2      | 0.8                                                      | 2.22                                                     |                                                                                        |                                                                                        |                                                                                               |                                                                                               | 1                                                                              | 1                                                                              | 7367    | 29882          | anaphase promoting complex subunit 2                                      | Ligase activity                              | -                         | Cell cycle control protein       | Cell communication;Signal transduction                                       | CULL            | Yes                      |
| VPS8        | 23355   | vacuolar protein sorting-associated protein 8 homolog isoform a      | NP_001009921.1    | 2          | 1                 | 1          | 2      | 0.8                                                      | 2.13                                                     |                                                                                        |                                                                                        |                                                                                               |                                                                                               | 1                                                                              | 1                                                                              | 11111   | 23355          | KIAA0804                                                                  | Molecular function unknown                   | -                         | Unclassified                     | Biological process unknown                                                   | RING            | No                       |

Supplementary Table S1. List of quantified proteins in OKF6/TERT1-Smoke cells  
 Raingopaln *et al.*, 2017. Role of protein kinase N2 (PKN2) in cigarette smoke-mediated oncogenic transformation of oral cells

| Gene Symbol | Gene ID | Protein Description                                                 | Protein Accession | # Proteins | # Unique Peptides | # Peptides | # PSMs | OKF6/TERT1-Smoke/<br>OKF6/TERT1-Parental<br>(130/126) R1 | OKF6/TERT1-Smoke/<br>OKF6/TERT1-Parental<br>(128/127) R2 | Ratio Standard Errors [%]:<br>OKF6/TERT1-Smoke/<br>OKF6/TERT1-Parental<br>(130/126) R1 | Ratio Standard Errors [%]:<br>OKF6/TERT1-Smoke/<br>OKF6/TERT1-Parental<br>(128/127) R2 | Ratio Variabilities [%]:<br>F13: OKF6/TERT1-<br>Smoke/<br>OKF6/TERT1-Parental<br>(130/126) R1 | Ratio Variabilities [%]:<br>F13: OKF6/TERT1-<br>Smoke/<br>OKF6/TERT1-Parental<br>(128/127) R2 | Ratio Counts: F13:<br>OKF6/TERT1-Smoke/<br>OKF6/TERT1-Parental<br>(130/126) R1 | Ratio Counts: F13:<br>OKF6/TERT1-Smoke/<br>OKF6/TERT1-Parental<br>(128/127) R2 | HPRD ID | Entrez Gene ID | Gene Name                                                                | Molecular Function                   | Primary Localization   | Molecular Class                     | Biological Process                                                           | Domains         | Plasma Proteome Database |
|-------------|---------|---------------------------------------------------------------------|-------------------|------------|-------------------|------------|--------|----------------------------------------------------------|----------------------------------------------------------|----------------------------------------------------------------------------------------|----------------------------------------------------------------------------------------|-----------------------------------------------------------------------------------------------|-----------------------------------------------------------------------------------------------|--------------------------------------------------------------------------------|--------------------------------------------------------------------------------|---------|----------------|--------------------------------------------------------------------------|--------------------------------------|------------------------|-------------------------------------|------------------------------------------------------------------------------|-----------------|--------------------------|
| VASP        | 7408    | vasodilator-stimulated phosphoprotein                               | NP_003361.1       | 1          | 7                 | 7          | 17     | 0.8                                                      | 2.13                                                     | 9.65                                                                                   | 6.27                                                                                   | 24.9                                                                                          | 44.2                                                                                          | 10                                                                             | 10                                                                             | 3415    | 7408           | vasodilator-stimulated phosphoprotein                                    | Cytoskeletal protein binding         | Cytoplasm              | Cytoskeletal associated protein     | Cytoskeleton organization and biogenesis                                     | WH1,CC          | Yes                      |
| NACC2       | 138151  | nucleus accumbens-associated protein 2                              | NP_653254.1       | 1          | 1                 | 1          | 1      | 0.71                                                     | 2.05                                                     |                                                                                        |                                                                                        |                                                                                               |                                                                                               | 1                                                                              | 1                                                                              | 9831    | 138151         | BTB (POZ) domain containing 14A                                          | Molecular function unknown           | -                      | Unclassified                        | Biological process unknown                                                   | BTB             | No                       |
| METTL3      | 56339   | N6-adenosine-methyltransferase 70 kDa subunit                       | NP_062826.2       | 1          | 2                 | 2          | 2      | 0.66                                                     | 3.16                                                     |                                                                                        |                                                                                        |                                                                                               |                                                                                               | 1                                                                              | 1                                                                              | 14389   | 56339          | methyltransferase like 3                                                 | Methyltransferase activity           | Nucleus                | Enzyme: Methyltransferase           | Regulation of nucleobase, nucleoside and nucleic acid metabolism             | NLS             | Yes                      |
| TFB2M       | 64216   | dimethyladenosine transferase 2, mitochondrial                      | NP_071761.1       | 1          | 3                 | 3          | 6      | 0.65                                                     | 3.59                                                     | 84.92                                                                                  | 26.36                                                                                  | 91.1                                                                                          | 223.9                                                                                         | 2                                                                              | 2                                                                              | 9520    | 64216          | transcription factor B2, mitochondrial                                   | Transcription factor activity        | Mitochondrion          | Transcription factor                | Regulation of nucleobase, nucleoside, nucleotide and nucleic acid metabolism | -               | No                       |
| CIAO1       | 9391    | probable cytosolic iron-sulfur protein assembly protein CIAO1       | NP_004795.1       | 1          | 2                 | 2          | 3      | 0.64                                                     | 2.58                                                     | 33                                                                                     | 30.03                                                                                  | 30.8                                                                                          | 152.5                                                                                         | 2                                                                              | 2                                                                              | 16057   | 9391           | WD repeat domain 39                                                      | Transcription regulator activity     | Nucleus                | Transcription regulatory protein    | Regulation of nucleobase, nucleoside, nucleotide and nucleic acid metabolism | WD40            | Yes                      |
| GNA15       | 2769    | guanine nucleotide-binding protein subunit alpha-15                 | NP_002059.3       | 1          | 1                 | 1          | 1      | 0.64                                                     | 2.52                                                     |                                                                                        |                                                                                        |                                                                                               |                                                                                               | 1                                                                              | 1                                                                              | 760     | 2769           | guanine nucleotide binding protein (G protein) alpha 15                  | GTPase activity                      | Plasma membrane        | G protein                           | Cell communication;Signal transduction                                       | -               | Yes                      |
| UBE2E1      | 7324    | ubiquitin-conjugating enzyme E2 E1 isoform 1                        | NP_003332.1       | 2          | 1                 | 1          | 2      | 0.62                                                     | 2.93                                                     | 25.98                                                                                  | 5.96                                                                                   | 23.2                                                                                          | 25.1                                                                                          | 2                                                                              | 2                                                                              | 4225    | 7324           | ubiquitin-conjugating enzyme E2E1 (UBC4-Schizosaccharomyces)             | Ubiquitin-specific protease activity | Nucleus                | Ubiquitin proteasome system protein | Protein metabolism                                                           | UBC             | Yes                      |
| POTEJ       | 653781  | POTE ankyrin domain family member J                                 | NP_001264012.1    | 1          | 1                 | 10         | 103    | 0.6                                                      | 2.32                                                     |                                                                                        |                                                                                        |                                                                                               |                                                                                               | 1                                                                              | 1                                                                              |         |                |                                                                          |                                      |                        |                                     |                                                                              |                 |                          |
| ACTB12      | 345651  | beta-actin-like protein 2                                           | NP_001017992.1    | 1          | 2                 | 12         | 370    | 0.6                                                      | 2.24                                                     | 110.87                                                                                 | 33.3                                                                                   | 118.5                                                                                         | 143.1                                                                                         | 2                                                                              | 2                                                                              | 18598   | 345651         | None                                                                     | Molecular function unknown           | -                      | Unclassified                        | Biological process unknown                                                   | ACTIN           | Yes                      |
| BTF3        | 689     | transcription factor BTF3 isoform B                                 | NP_001198.2       | 1          | 1                 | 11         | 110    | 0.58                                                     | 6.28                                                     |                                                                                        |                                                                                        |                                                                                               |                                                                                               | 1                                                                              | 1                                                                              | 3966    | 689            | basic transcription factor 3                                             | Transcription factor activity        | Nucleus                | Transcription factor                | Regulation of nucleobase, nucleoside and nucleic acid metabolism             | -               | Yes                      |
| SH3RF2      | 153769  | putative E3 ubiquitin-protein ligase SH3RF2                         | NP_689763.3       | 1          | 1                 | 1          | 1      | 0.56                                                     | 3.48                                                     |                                                                                        |                                                                                        |                                                                                               |                                                                                               | 1                                                                              | 1                                                                              | 10229   | 153769         | SH3 domain containing ring finger 2                                      | Ubiquitin-specific protease activity | -                      | Ubiquitin proteasome system protein | Protein metabolism                                                           | RING,SH3        | Yes                      |
| PROSC       | 11212   | proline synthase co-transcribed bacterial homolog protein           | NP_009129.1       | 1          | 2                 | 2          | 3      | 0.56                                                     | 3.11                                                     | 55.65                                                                                  | 25.1                                                                                   | 46.4                                                                                          | 154                                                                                           | 2                                                                              | 2                                                                              | 16060   | 11212          | proline synthase co-transcribed homolog(bacterial)                       | Racemase and epimerase activity      | Cytoplasm              | Enzyme: Racemase                    | Metabolism;Energy pathways                                                   | -               | No                       |
| HEXDC       | 284004  | hexosaminidase D                                                    | NP_775891.2       | 1          | 1                 | 1          | 1      | 0.56                                                     | 2.75                                                     |                                                                                        |                                                                                        |                                                                                               |                                                                                               | 1                                                                              | 1                                                                              | 8677    | 284004         | None                                                                     | Molecular function unknown           | -                      | Unclassified                        | Biological process unknown                                                   | -               | No                       |
| TMED5       | 50999   | transmembrane emp24 domain-containing protein 5 isoform 1 precursor | NP_057124.3       | 1          | 1                 | 1          | 4      | 0.56                                                     | 2.72                                                     | 7.3                                                                                    | 0.25                                                                                   | 5.8                                                                                           | 1                                                                                             | 2                                                                              | 2                                                                              | 13028   | 50999          | transmembrane emp24 protein transport domaincontaining 5                 | Molecular function unknown           | Membrane fraction      | Unclassified                        | Biological process unknown                                                   | SP;TM           | No                       |
| Mar-05      | 54708   | E3 ubiquitin-protein ligase MARCH5                                  | NP_060294.1       | 1          | 2                 | 2          | 4      | 0.54                                                     | 2.16                                                     | 4.73                                                                                   | 21.22                                                                                  | 3.6                                                                                           | 72.5                                                                                          | 2                                                                              | 2                                                                              |         |                |                                                                          |                                      |                        |                                     |                                                                              |                 |                          |
| MBNL1       | 4154    | muscleblind-like protein 1 isoform c                                | NP_997176.1       | 10         | 3                 | 3          | 4      | 0.53                                                     | 2.44                                                     | 7.65                                                                                   | 3.39                                                                                   | 5.7                                                                                           | 11.7                                                                                          | 2                                                                              | 2                                                                              | 7355    | 4154           | muscleblind-like (Drosophila)                                            | RNA binding                          | Nucleus;Cytoplasm      | RNA binding protein                 | Regulation of gene expression, epigenetic                                    | ZnF_C3H1;ZnF_C4 | Yes                      |
| TNFRSF12A   | 51330   | tumor necrosis factor receptor superfamily member 12A precursor     | NP_057723.1       | 1          | 1                 | 1          | 2      | 0.5                                                      | 1.35                                                     |                                                                                        |                                                                                        |                                                                                               |                                                                                               | 1                                                                              | 1                                                                              | 5801    | 51330          | tumor necrosis factor receptor superfamily member 12A                    | Receptor activity                    | Plasma membrane        | Cell surface receptor               | Cell communication;Signal transduction                                       | TM,SP           | Yes                      |
| GINS4       | 84296   | DNA replication complex GINS protein SLD5                           | NP_115712.1       | 1          | 2                 | 2          | 2      | 0.5                                                      | 0.92                                                     |                                                                                        |                                                                                        |                                                                                               |                                                                                               | 1                                                                              | 1                                                                              | 11583   | 84296          | None                                                                     | Molecular function unknown           | Cytoplasm              | Unclassified                        | Biological process unknown                                                   | CC              | No                       |
| ATP6        | 4508    | ATP synthase F0 subunit 6                                           | YP_003024031.1    | 1          | 1                 | 1          | 4      | 0.5                                                      | 0.82                                                     |                                                                                        |                                                                                        |                                                                                               |                                                                                               | 1                                                                              | 1                                                                              |         |                |                                                                          |                                      |                        |                                     |                                                                              |                 |                          |
| FLNC        | 2318    | filamin-C isoform a                                                 | NP_001449.3       | 2          | 5                 | 17         | 84     | 0.49                                                     | 1.12                                                     | 43.15                                                                                  | 9.44                                                                                   | 84.3                                                                                          | 38                                                                                            | 12                                                                             | 12                                                                             | 18      | 2318           | filamin C, gamma (actin binding protein 280)                             | Cytoskeletal protein binding         | Cytoplasm              | Cytoskeletal associated protein     | Cell growth and/or maintenance                                               | CH2,IGFLMN      | Yes                      |
| NNT         | 23530   | NAD(P) transhydrogenase, mitochondrial                              | NP_036475.3       | 1          | 2                 | 2          | 7      | 0.49                                                     | 0.64                                                     | 34.03                                                                                  | 29.75                                                                                  | 29.8                                                                                          | 34.1                                                                                          | 3                                                                              | 3                                                                              | 9715    | 23530          | nicotinamide nucleotide transhydrogenase                                 | Oxidoreductase activity              | Mitochondrial membrane | Enzyme: Oxidoreductase              | Energy pathways                                                              | TM              | Yes                      |
| SERPIN3     | 6317    | serpin B3                                                           | NP_008850.1       | 1          | 2                 | 2          | 3      | 0.48                                                     | 0.81                                                     | 90.91                                                                                  | 118.82                                                                                 | 68.7                                                                                          | 230.6                                                                                         | 2                                                                              | 2                                                                              | 2745    | 6317           | serine (or cysteine) proteinase inhibitor, clade B (ovalbumin), member 3 | Protease inhibitor activity          | Cytoplasm              | Protease inhibitor                  | Protein metabolism                                                           | SERPIN          | Yes                      |
| MPDU1       | 9526    | mannose-P-dolichol utilization defect 1 protein                     | NP_004861.2       | 1          | 1                 | 1          | 5      | 0.48                                                     | 0.78                                                     | 28.33                                                                                  | 0.05                                                                                   | 19.2                                                                                          | 0.1                                                                                           | 2                                                                              | 2                                                                              | 4951    | 9526           | mannose-P-dolichol utilization defect 1                                  | Molecular function unknown           | Integral to membrane   | Integral membrane protein           | Metabolism;Energy pathways                                                   | CTNS;TM         | No                       |
| SH3D19      | 152503  | SH3 domain-containing protein 19 isoform 1                          | NP_001009555.3    | 3          | 1                 | 1          | 5      | 0.48                                                     | 0.77                                                     | 18.16                                                                                  | 43.79                                                                                  | 12.4                                                                                          | 50.3                                                                                          | 2                                                                              | 2                                                                              | 16364   | 152503         | None                                                                     | Molecular function unknown           | Cytoplasm              | Unclassified                        | Cell communication;Signal transduction                                       | SH3;SH2         | No                       |
| CYB5R1      | 51706   | NADH-cytochrome b5 reductase 1                                      | NP_057327.2       | 1          | 9                 | 9          | 20     | 0.48                                                     | 0.52                                                     | 40.28                                                                                  | 23.03                                                                                  | 75.9                                                                                          | 43.1                                                                                          | 12                                                                             | 12                                                                             | 6434    | 51706          | NAD(P)H:quinone oxidoreductase type 3, polypeptide A2                    | Catalytic activity                   | Endoplasmic reticulum  | Enzyme: Reductase                   | Metabolism;Energy pathways                                                   | SP              | No                       |
| KNTC1       | 9735    | kinetochore-associated protein 1                                    | NP_055523.1       | 1          | 1                 | 1          | 2      | 0.47                                                     | 0.84                                                     |                                                                                        |                                                                                        |                                                                                               |                                                                                               | 1                                                                              | 1                                                                              | 9561    | 9735           | kinetochore associated 1                                                 | Chromatin binding                    | Nucleus                | Cell cycle control protein          | Cell communication;Signal transduction;Chromosome segregation                | -               | Yes                      |

Supplementary Table S1. List of quantified proteins in OKF6/TERT1-Smoke cells  
 Raingonalan *et al.*, 2017. Role of protein kinase N2 (PKN2) in cigarette smoke-mediated oncogenic transformation of oral cells

| Gene Symbol | Gene ID | Protein Description                                                  | Protein Accession | # Proteins | # Unique Peptides | # Peptides | # PSMs | OKF6/TERT1-Smoke/<br>OKF6/TERT1-Parental<br>(130/126) R1 | OKF6/TERT1-Smoke/<br>OKF6/TERT1-Parental<br>(128/127) R2 | Ratio Standard Errors [%]:<br>OKF6/TERT1-Smoke/<br>OKF6/TERT1-Parental<br>(130/126) R1 | Ratio Standard Errors [%]:<br>OKF6/TERT1-Smoke/<br>OKF6/TERT1-Parental<br>(128/127) R2 | Ratio Variabilities [%]:<br>F13: OKF6/TERT1-<br>Smoke/<br>OKF6/TERT1-Parental<br>(130/126) R1 | Ratio Variabilities [%]:<br>F13: OKF6/TERT1-<br>Smoke/<br>OKF6/TERT1-Parental<br>(128/127) R2 | Ratio Counts: F13:<br>OKF6/TERT1-Smoke/<br>OKF6/TERT1-Parental<br>(130/126) R1 | Ratio Counts: F13:<br>OKF6/TERT1-Smoke/<br>OKF6/TERT1-Parental<br>(128/127) R2 | HPRD ID | Entrez Gene ID | Gene Name                                                                                                           | Molecular Function                     | Primary Localization              | Molecular Class                  | Biological Process                                                           | Domains                   | Plasma Proteome Database |
|-------------|---------|----------------------------------------------------------------------|-------------------|------------|-------------------|------------|--------|----------------------------------------------------------|----------------------------------------------------------|----------------------------------------------------------------------------------------|----------------------------------------------------------------------------------------|-----------------------------------------------------------------------------------------------|-----------------------------------------------------------------------------------------------|--------------------------------------------------------------------------------|--------------------------------------------------------------------------------|---------|----------------|---------------------------------------------------------------------------------------------------------------------|----------------------------------------|-----------------------------------|----------------------------------|------------------------------------------------------------------------------|---------------------------|--------------------------|
| DOPEY2      | 9980    | protein dopey-2                                                      | NP_005119.2       | 1          | 1                 | 1          | 2      | 0.47                                                     | 0.78                                                     |                                                                                        |                                                                                        |                                                                                               |                                                                                               | 1                                                                              |                                                                                | 7271    | 9980           | chromosome 21 open reading frame 5                                                                                  | Molecular function unknown             | -                                 | Unclassified                     | Cell growth and/or maintenance                                               | -                         | Yes                      |
| TAGLN       | 6876    | transgelin                                                           | NP_003177.2       | 1          | 2                 | 2          | 4      | 0.47                                                     | 0.7                                                      | 35.27                                                                                  | 16.42                                                                                  | 23.7                                                                                          | 16.3                                                                                          | 2                                                                              | 2                                                                              | 2891    | 6876           | transgelin                                                                                                          | Cytoskeletal protein binding           | Cytoplasm                         | Cytoskeletal associated protein  | Muscle development                                                           | CH                        | Yes                      |
| STOM        | 2040    | erythrocyte band 7 integral membrane protein isoform a               | NP_004090.4       | 4          | 8                 | 8          | 52     | 0.47                                                     | 0.54                                                     | 43.53                                                                                  | 14.83                                                                                  | 142.8                                                                                         | 43.3                                                                                          | 27                                                                             | 27                                                                             | 585     | 2040           | stomatin                                                                                                            | Channel regulator activity             | Cytoplasmic vesicle               | Integral membrane protein        | Cell communication;Signal transduction                                       | PHB;TM                    | Yes                      |
| ATE1        | 11101   | arginyl-tRNA-protein transferase 1 isoform 2                         | NP_008972.2       | 5          | 1                 | 1          | 1      | 0.46                                                     | 0.87                                                     |                                                                                        |                                                                                        |                                                                                               |                                                                                               | 1                                                                              | 1                                                                              | 6979    | 11101          | arginyltransferase 1                                                                                                | Acyltransferase activity               | Cytoplasm                         | Enzyme: Acyltransferase          | Protein metabolism                                                           | -                         | Yes                      |
| KDF1        | 126695  | keratinocyte differentiation factor 1                                | NP_689578.2       | 1          | 1                 | 1          | 2      | 0.45                                                     | 0.89                                                     |                                                                                        |                                                                                        |                                                                                               |                                                                                               | 1                                                                              | 1                                                                              |         |                |                                                                                                                     |                                        |                                   |                                  |                                                                              |                           |                          |
| SUMF2       | 25870   | sulfatase-modifying factor 2 isoform precursor                       | NP_001123541.1    | 4          | 2                 | 2          | 4      | 0.45                                                     | 0.78                                                     | 47.37                                                                                  | 5.17                                                                                   | 31                                                                                            | 5.7                                                                                           | 2                                                                              | 2                                                                              | 6400    | 25870          | sulfatase modifying factor 2                                                                                        | Molecular function unknown             | Endoplasmic reticulum             | Unclassified                     | Protein metabolism                                                           | SP;TM                     | Yes                      |
| NF2         | 4771    | merlin isoform 1                                                     | NP_000259.1       | 6          | 2                 | 2          | 3      | 0.45                                                     | 0.75                                                     |                                                                                        |                                                                                        |                                                                                               |                                                                                               | 1                                                                              | 1                                                                              | 6980    | 4771           | neurofibromin 2 (bilateral acoustic neuroma)                                                                        | Structural constituent of cytoskeleton | Cytoplasm;Nucleus;Plasma membrane | Cytoskeletal associated protein  | Cell growth and/or maintenance                                               | B41;ERM;CC                | Yes                      |
| KRT72       | 140807  | keratin, type II cytoskeletal 72 isoform 1                           | NP_542785.1       | 3          | 1                 | 7          | 61     | 0.45                                                     | 0.66                                                     |                                                                                        |                                                                                        |                                                                                               |                                                                                               | 1                                                                              | 1                                                                              | 9746    | 140807         | None                                                                                                                | Structural constituent of cytoskeleton | Cytoskeleton                      | Cytoskeletal protein             | Cell growth and/or maintenance                                               | CC                        | Yes                      |
| SRR         | 63826   | serine racemase isoform a                                            | NP_068766.1       | 2          | 1                 | 1          | 2      | 0.45                                                     | 0.58                                                     |                                                                                        |                                                                                        |                                                                                               |                                                                                               | 1                                                                              | 1                                                                              | 10451   | 63826          | serine racemase                                                                                                     | Racemase and epimerase activity        | Cytoplasm                         | Enzyme: Racemase                 | Metabolism;Energy pathways                                                   | -                         | Yes                      |
| GSN         | 2934    | gelsolin isoform b                                                   | NP_001121134.1    | 6          | 24                | 24         | 97     | 0.45                                                     | 0.55                                                     | 14.73                                                                                  | 10.37                                                                                  | 50.4                                                                                          | 42.7                                                                                          | 51                                                                             | 51                                                                             | 674     | 2934           | gelsolin (amyloidosis, Finnish type)                                                                                | Structural constituent of cytoskeleton | Extracellular                     | Cytoskeletal protein             | Cell growth and/or maintenance                                               | GEL;SP                    | Yes                      |
| ARPC3       | 10094   | actin-related protein 2/3 complex subunit 3 isoform 1                | NP_001265485.1    | 2          | 6                 | 6          | 19     | 0.44                                                     | 1.98                                                     | 33.65                                                                                  | 7.87                                                                                   | 46.3                                                                                          | 49.4                                                                                          | 9                                                                              | 9                                                                              | 9175    | 10094          | actin related protein 2/3 complex, subunit 3, 2.1kDa                                                                | Cytoskeletal protein binding           | Cytoplasm                         | Cytoskeletal associated protein  | Cell growth and/or maintenance                                               | -                         | Yes                      |
| SYNPO2      | 171024  | synaptopodin-2 isoform a                                             | NP_597734.2       | 4          | 1                 | 1          | 4      | 0.44                                                     | 1.4                                                      | 30.55                                                                                  | 10.91                                                                                  | 19.1                                                                                          | 21.8                                                                                          | 2                                                                              | 2                                                                              | 15456   | 171024         | synaptopodin 2                                                                                                      | Molecular function unknown             | Cytoplasm                         | Unclassified                     | Biological process unknown                                                   | PDZ                       | Yes                      |
| ANLN        | 54443   | actin-binding protein anillin isoform 1                              | NP_061155.2       | 3          | 1                 | 1          | 2      | 0.44                                                     | 0.79                                                     |                                                                                        |                                                                                        |                                                                                               |                                                                                               | 1                                                                              | 1                                                                              | 9799    | 54443          | anillin, actin binding protein (scraps, homolog, Drosophila)                                                        | Structural molecule activity           | Nucleus                           | Structural protein               | Cell growth and/or maintenance                                               | CC;PH                     | Yes                      |
| MBOAT2      | 129642  | lysophospholipid acyltransferase 2                                   | NP_620154.2       | 1          | 1                 | 1          | 2      | 0.44                                                     | 0.54                                                     |                                                                                        |                                                                                        |                                                                                               |                                                                                               | 1                                                                              | 1                                                                              | 11410   | 129642         | O-acyltransferase (membrane bound) domain containing 2                                                              | Molecular function unknown             | Plasma membrane                   | Unclassified                     | Biological process unknown                                                   | TM                        | No                       |
| TSPO        | 706     | translocator protein                                                 | NP_000705.2       | 1          | 2                 | 2          | 2      | 0.43                                                     | 1.25                                                     |                                                                                        |                                                                                        |                                                                                               |                                                                                               | 1                                                                              | 1                                                                              | 15913   | 706            | benzodiazepine receptor (peripheral)                                                                                | Receptor activity                      | Mitochondrion                     | Integral membrane protein        | Cell communication;Signal transduction                                       | TM                        | Yes                      |
| CCNT2       | 905     | cyclin-T2 isoform a                                                  | NP_001232.1       | 2          | 2                 | 2          | 6      | 0.42                                                     | 0.79                                                     | 66.98                                                                                  | 2.24                                                                                   | 40.9                                                                                          | 2.5                                                                                           | 2                                                                              | 2                                                                              | 4839    | 905            | cyclin T2                                                                                                           | Transcription regulator activity       | Nucleus                           | Transcription regulatory protein | Regulation of nucleobase, nucleoside, nucleotide and nucleic acid metabolism | CYCLIN                    | Yes                      |
| MAP2K7      | 5609    | dual specificity mitogen-activated protein kinase kinase 7 isoform 1 | NP_001284484.1    | 3          | 1                 | 1          | 1      | 0.42                                                     | 0.56                                                     |                                                                                        |                                                                                        |                                                                                               |                                                                                               | 1                                                                              | 1                                                                              | 4309    | 5609           | mitogen-activated protein kinase threonine/tyrosine kinase 7                                                        | Protein kinase activity                | Cytoplasm                         | Dual specificity kinase          | Signal transduction                                                          | S,T,Y_Kinase;C,S,T_Kinase | Yes                      |
| TPM1        | 7168    | tropomyosin alpha-1 chain isoform Tpm1.4am                           | NP_001018007.1    | 2          | 2                 | 14         | 1087   | 0.41                                                     | 1.13                                                     | 4.45                                                                                   | 1.13                                                                                   | 43.1                                                                                          | 29.2                                                                                          | 502                                                                            | 502                                                                            | 1839    | 7168           | tropomyosin 1 (alpha)                                                                                               | Cytoskeletal protein binding           | Actin cytoskeleton                | Cytoskeletal associated protein  | Cell growth and/or maintenance                                               | CC                        | Yes                      |
| CRABP2      | 1382    | cellular retinoic acid-binding protein 2                             | NP_001869.1       | 2          | 5                 | 5          | 13     | 0.41                                                     | 0.56                                                     | 48.03                                                                                  | 53.87                                                                                  | 60.6                                                                                          | 102.3                                                                                         | 8                                                                              | 8                                                                              | 8353    | 1382           | cellular retinoic acid binding protein 2                                                                            | Transcription regulator activity       | Cytoplasm                         | Transcription regulatory protein | Regulation of nucleobase, nucleoside, nucleotide and nucleic acid metabolism | -                         | Yes                      |
| VANGL1      | 81839   | vang-like protein 1 isoform 1                                        | NP_620409.1       | 2          | 2                 | 2          | 2      | 0.39                                                     | 1.31                                                     |                                                                                        |                                                                                        |                                                                                               |                                                                                               | 1                                                                              | 1                                                                              | 18279   | 81839          | vang-like 1 (van gogh, Drosophila)                                                                                  | Protein binding                        | Integral to membrane              | Integral membrane protein        | Cell communication;Signal transduction                                       | TM                        | Yes                      |
| RAB29       | 8934    | ras-related protein Rab-7L1 isoform 1                                | NP_003920.1       | 3          | 2                 | 3          | 11     | 0.39                                                     | 1.13                                                     |                                                                                        |                                                                                        |                                                                                               |                                                                                               | 1                                                                              | 1                                                                              |         |                |                                                                                                                     |                                        |                                   |                                  |                                                                              |                           |                          |
| HACD4       | 401494  | very-long-chain (3R)-3-hydroxyacyl-CoA dehydratase 4                 | NP_001010915.2    | 1          | 1                 | 1          | 2      | 0.39                                                     | 0.59                                                     |                                                                                        |                                                                                        |                                                                                               |                                                                                               | 1                                                                              | 1                                                                              |         |                |                                                                                                                     |                                        |                                   |                                  |                                                                              |                           |                          |
| PLSCR1      | 5359    | phospholipid scramblase 1                                            | NP_066928.1       | 4          | 1                 | 1          | 1      | 0.38                                                     | 0.62                                                     |                                                                                        |                                                                                        |                                                                                               |                                                                                               | 1                                                                              | 1                                                                              | 8855    | 5359           | phospholipid scramblase 1                                                                                           | Protein binding                        | Plasma membrane                   | Integral membrane protein        | Cell communication;Signal transduction                                       | TM                        | Yes                      |
| SORBS1      | 10580   | sorbin and SH3 domain-containing protein 1 isoform 3                 | NP_001030126.1    | 12         | 2                 | 2          | 8      | 0.37                                                     | 1.03                                                     | 59.11                                                                                  | 11.93                                                                                  | 46.4                                                                                          | 21.5                                                                                          | 4                                                                              | 3                                                                              | 5587    | 10580          | sorbin and SH3 domain containing 1                                                                                  | Cell adhesion molecule activity        | Cell junction                     | Cell junction protein            | Signal transduction;Cytoskeleton organization and biogenesis                 | SORB;SH3                  | Yes                      |
| PRNP        | 5621    | major prion protein preproprotein                                    | NP_000302.1       | 1          | 4                 | 4          | 7      | 0.37                                                     | 0.76                                                     | 27.56                                                                                  | 61.43                                                                                  | 17.7                                                                                          | 96.7                                                                                          | 3                                                                              | 3                                                                              | 1453    | 5621           | prion protein (p27-30) (Creutzfeldt-Jakob disease, Gerstmann-Strausler-Scheinker syndrome, fatal familial insomnia) | Molecular function unknown             | Plasma membrane                   | Membrane bound ligand            | Metabolism                                                                   | SP;TM                     | Yes                      |
| GSTT1       | 2952    | glutathione S-transferase theta-1 isoform a                          | NP_000844.2       | 5          | 2                 | 2          | 4      | 0.31                                                     | 1.09                                                     |                                                                                        |                                                                                        |                                                                                               |                                                                                               | 1                                                                              | 1                                                                              | 2700    | 2952           | glutathione S-transferase theta 1                                                                                   | Glutathione transferase activity       | Nucleus                           | Enzyme: Glutathione transferase  | Metabolism;Energy pathways                                                   | -                         | No                       |
| GLS2        | 27165   | glutaminase liver isoform, mitochondrial isoform 1 precursor         | NP_037399.2       | 1          | 1                 | 1          | 1      | 0.31                                                     | 1.05                                                     |                                                                                        |                                                                                        |                                                                                               |                                                                                               | 1                                                                              | 1                                                                              | 5901    | 27165          | glutaminase 2 (liver, mitochondrial)                                                                                | Hydrolase activity                     | Mitochondrion                     | Enzyme: Hydrolase                | Metabolism;Energy pathways                                                   | ANK                       | Yes                      |
| LZIC        | 84328   | protein LZIC                                                         | NP_115744.2       | 1          | 1                 | 1          | 2      | 0.31                                                     | 0.67                                                     |                                                                                        |                                                                                        |                                                                                               |                                                                                               | 1                                                                              | 1                                                                              | 14340   | 84328          | leucine zipper and CTNBP1 domain containing                                                                         | Molecular function unknown             | -                                 | Unclassified                     | Biological process unknown                                                   | CC                        | No                       |

Supplementary Table S1. List of quantified proteins in OKF6/TERT1-Smoke cells  
 Raingonalan *et al.*, 2017. Role of protein kinase N2 (PKN2) in cigarette smoke-mediated oncogenic transformation of oral cells

| Gene Symbol | Gene ID | Protein Description                                                        | Protein Accession | # Proteins | # Unique Peptides | # Peptides | # PSMs | OKF6/TERT1-Smoke/<br>OKF6/TERT1-Parental<br>(130/126) R1 | OKF6/TERT1-Smoke/<br>OKF6/TERT1-Parental<br>(128/127) R2 | Ratio Standard Errors [%]:<br>OKF6/TERT1-Smoke/<br>OKF6/TERT1-Parental<br>(130/126) R1 | Ratio Standard Errors [%]:<br>OKF6/TERT1-Smoke/<br>OKF6/TERT1-Parental<br>(128/127) R2 | Ratio Variabilities [%]:<br>F13: OKF6/TERT1-<br>Smoke/<br>OKF6/TERT1-Parental<br>(130/126) R1 | Ratio Variabilities [%]:<br>F13: OKF6/TERT1-<br>Smoke/<br>OKF6/TERT1-Parental<br>(128/127) R2 | Ratio Counts: F13:<br>OKF6/TERT1-Smoke/<br>OKF6/TERT1-Parental<br>(130/126) R1 | Ratio Counts: F13:<br>OKF6/TERT1-Smoke/<br>OKF6/TERT1-Parental<br>(128/127) R2 | HPRD ID | Entrez Gene ID | Gene Name                                                                                                                                                             | Molecular Function                              | Primary Localization                    | Molecular Class                     | Biological Process                                               | Domains                | Plasma Proteome Database |
|-------------|---------|----------------------------------------------------------------------------|-------------------|------------|-------------------|------------|--------|----------------------------------------------------------|----------------------------------------------------------|----------------------------------------------------------------------------------------|----------------------------------------------------------------------------------------|-----------------------------------------------------------------------------------------------|-----------------------------------------------------------------------------------------------|--------------------------------------------------------------------------------|--------------------------------------------------------------------------------|---------|----------------|-----------------------------------------------------------------------------------------------------------------------------------------------------------------------|-------------------------------------------------|-----------------------------------------|-------------------------------------|------------------------------------------------------------------|------------------------|--------------------------|
| S100A10     | 6281    | protein S100-A10                                                           | NP_002957.1       | 1          | 3                 | 3          | 9      | 0.31                                                     | 0.52                                                     | 39.13                                                                                  | 11.08                                                                                  | 30.2                                                                                          | 14.1                                                                                          | 6                                                                              | 6                                                                              | 232     | 6281           | S100 calcium binding protein A10 (annexin IIIgand, calpactin I, light polypeptide (p11)) (Homo sapiens)Other Aliases:HGNC:10487, I2C, ANX2L, ANX2LG, CAL1L, CLP11, Ca | Calcium ion binding                             | Plasma membrane                         | Calcium binding protein             | Cell communication;Signal transduction                           | S_100;TM               | Yes                      |
| CNN1        | 1264    | calponin-1 isoform 1                                                       | NP_001290.2       | 2          | 2                 | 2          | 11     | 0.3                                                      | 1.34                                                     | 52.88                                                                                  | 13.9                                                                                   | 28                                                                                            | 33                                                                                            | 3                                                                              | 3                                                                              | 2884    | 1264           | calponin 1, basic, smooth muscle                                                                                                                                      | Cytoskeletal protein binding                    | Cytoplasm                               | Cytoskeletal associated protein     | Cell growth and/or maintenance                                   | CH                     | Yes                      |
| HACD2       | 201562  | very-long-chain (3R)-3-hydroxyacyl-CoA dehydratase 2                       | NP_940684.1       | 1          | 1                 | 1          | 2      | 0.26                                                     | 0.76                                                     |                                                                                        |                                                                                        |                                                                                               |                                                                                               | 1                                                                              | 1                                                                              |         |                |                                                                                                                                                                       |                                                 |                                         |                                     |                                                                  |                        |                          |
| SYNM        | 25336   | synemin isoform A                                                          | NP_663780.2       | 1          | 1                 | 1          | 4      | 0.18                                                     | 1.5                                                      | 179.37                                                                                 | 16.07                                                                                  | 47.8                                                                                          | 35                                                                                            | 2                                                                              | 2                                                                              | 7305    | 25336          | desmuslin                                                                                                                                                             | Structural constituent of cytoskeleton          | Intermediate filament;Nucleus;Cytoplasm | Cytoskeletal protein                | Cell growth and/or maintenance                                   | CC                     | Yes                      |
| PREX1       | 57580   | phosphatidylinositol 3,4,5-trisphosphate-dependent Rac exchanger 1 protein | NP_065871.2       | 1          | 1                 | 1          | 1      | 0.13                                                     | 0.79                                                     |                                                                                        |                                                                                        |                                                                                               |                                                                                               | 1                                                                              | 1                                                                              | 6066    | 57580          | None                                                                                                                                                                  | Guanyl-nucleotide exchange factor activity      | Cytoplasm                               | Guanine nucleotide exchange factor  | Cell communication;Signal transduction                           | RHOGEF;PHDS H;PDZ;CC   | Yes                      |
| UBQLN2      | 29978   | ubiquitin-2                                                                | NP_038472.2       | 1          | 2                 | 3          | 12     | 0.1                                                      | 0.6                                                      |                                                                                        |                                                                                        |                                                                                               |                                                                                               | 1                                                                              | 1                                                                              | 2224    | 29978          | ubiquitin 2                                                                                                                                                           | Ubiquitin-specific protease activity            | Cytoplasm                               | Ubiquitin proteasome system protein | Protein metabolism                                               | UBQ;STU1;UBA           | Yes                      |
| TRPM2       | 7226    | transient receptor potential cation channel subfamily M member 2           | NP_003298.1       | 1          | 1                 | 1          | 1      | 0.03                                                     |                                                          |                                                                                        |                                                                                        |                                                                                               |                                                                                               | 1                                                                              |                                                                                | 4777    | 7226           | transient receptor potential cation channel, subfamily M, member 2                                                                                                    | Intracellular ligand-gated ion channel activity | Plasma membrane                         | Intracellular ligand-gated channel  | Ion transport                                                    | TM                     | Yes                      |
| BBS1        | 582     | Bardet-Biedl syndrome 1 protein                                            | NP_078925.3       | 1          | 2                 | 2          | 2      | 0.03                                                     |                                                          |                                                                                        |                                                                                        |                                                                                               |                                                                                               | 1                                                                              |                                                                                | 1950    | 582            | Bardet-Biedl syndrome 1                                                                                                                                               | Molecular function unknown                      | Cytoplasm                               | Unclassified                        | Biological_process unknown                                       | -                      | Yes                      |
| MUC2        | 4583    | mucin-2 precursor                                                          | NP_002448.3       | 1          | 2                 | 2          | 3      | 1.99                                                     | 0.24                                                     |                                                                                        |                                                                                        |                                                                                               |                                                                                               | 1                                                                              | 1                                                                              | 11828   | 4583           | mucin 2, intestinal/tracheal                                                                                                                                          | Molecular function unknown                      | Endoplasmic reticulum                   | Secreted polypeptide                | Biological_process unknown                                       | SP;VWD;VWC;CT          | Yes                      |
| TCEB3B      | 51224   | RNA polymerase II transcription factor SIII subunit A2                     | NP_057511.2       | 1          | 1                 | 1          | 2      | 1.8                                                      | 0.5                                                      | 25.75                                                                                  | 57.06                                                                                  | 73.2                                                                                          | 42.3                                                                                          | 2                                                                              | 2                                                                              | 18169   | 51224          | transcription elongation factor B polypeptide 3B (elongin A2)                                                                                                         | Transcription regulator activity                | Nucleus                                 | Transcription regulatory protein    | Regulation of nucleobase, nucleotide and nucleic acid metabolism | TFS                    | Yes                      |
| ZYG11B      | 79699   | protein zyg-11 homolog B                                                   | NP_078922.1       | 1          | 1                 | 1          | 1      | 1.79                                                     | 0.45                                                     |                                                                                        |                                                                                        |                                                                                               |                                                                                               | 1                                                                              | 1                                                                              | 13356   | 79699          | zyg-11 homolog (C. elegans)                                                                                                                                           | Molecular function unknown                      | -                                       | Unclassified                        | Biological_process unknown                                       | -                      | No                       |
| UCHL5       | 51377   | ubiquitin carboxyl-terminal hydrolase isozyme L5 isoform 2                 | NP_001186190.1    | 3          | 1                 | 9          | 25     | 1.74                                                     | 0.32                                                     | 0.46                                                                                   | 27.8                                                                                   | 1.4                                                                                           | 15.4                                                                                          | 3                                                                              | 3                                                                              | 10293   | 51377          | ubiquitin carboxyl-terminal hydrolase L5                                                                                                                              | Ubiquitin-specific protease activity            | Nucleus                                 | Ubiquitin proteasome system protein | Protein metabolism                                               | CC                     | Yes                      |
| RNASET2     | 8635    | ribonuclease T2 precursor                                                  | NP_003721.2       | 1          | 1                 | 1          | 4      | 1.7                                                      | 0.46                                                     | 4.24                                                                                   | 10.13                                                                                  | 10.2                                                                                          | 6.6                                                                                           | 2                                                                              | 2                                                                              | 10197   | 8635           | ribonuclease T2                                                                                                                                                       | Ribonuclease activity                           | Cytoplasm                               | Ribonuclease                        | Regulation of nucleobase, nucleotide and nucleic acid metabolism | SP                     | Yes                      |
| YIF1B       | 90522   | protein YIF1B isoform 5                                                    | NP_001034761.1    | 6          | 2                 | 2          | 3      | 1.63                                                     | 0.5                                                      | 17.85                                                                                  | 106.81                                                                                 | 43                                                                                            | 87.7                                                                                          | 2                                                                              | 2                                                                              | 11277   | 90522          | Yip1 interacting factor homolog B (S.cerevisiae)                                                                                                                      | Molecular function unknown                      | -                                       | Integral membrane protein           | Biological_process unknown                                       | TM                     | No                       |
| FGG         | 2266    | fibrinogen gamma chain isoform gamma-B precursor                           | NP_068656.2       | 2          | 1                 | 1          | 448    | 1.45                                                     | 0.32                                                     | 1.42                                                                                   | 10.6                                                                                   | 31.2                                                                                          | 53                                                                                            | 218                                                                            | 219                                                                            | 621     | 2266           | fibrinogen, gamma polypeptide                                                                                                                                         | Protein binding                                 | Extracellular                           | Coagulation factor                  | Protein metabolism                                               | FBG;SP;CC              | Yes                      |
| KNG1        | 3827    | kininogen-1 isoform 1 precursor                                            | NP_001095886.1    | 2          | 1                 | 1          | 9      | 1.41                                                     | 0.4                                                      | 7.39                                                                                   | 79.88                                                                                  | 23.6                                                                                          | 81.2                                                                                          | 5                                                                              | 5                                                                              | 1970    | 3827           | kininogen 1                                                                                                                                                           | Protease inhibitor activity                     | Extracellular                           | Coagulation factor                  | Protein metabolism                                               | CVSTATIN;SP            | Yes                      |
| HIST1H2AD   | 3013    | histone H2A type 1-D                                                       | NP_066409.1       | 2          | 1                 | 7          | 168    | 1.36                                                     | 0.48                                                     | 0.41                                                                                   | 13.75                                                                                  | 1                                                                                             | 11.4                                                                                          | 3                                                                              | 3                                                                              | 7534    | 3013           | histone 1, H2ad                                                                                                                                                       | DNA binding                                     | Nucleus                                 | DNA binding protein                 | Regulation of nucleobase, nucleotide and nucleic acid metabolism | -                      | No                       |
| NDUFA3      | 4696    | NADH dehydrogenase [ubiquinone] 1 alpha subcomplex subunit 3               | NP_004533.1       | 1          | 1                 | 1          | 1      | 1.31                                                     | 0.5                                                      |                                                                                        |                                                                                        |                                                                                               |                                                                                               | 1                                                                              | 1                                                                              | 4830    | 4696           | NADH dehydrogenase (ubiquinone) 1 alpha subcomplex, 3, 9kDa                                                                                                           | Oxidoreductase activity                         | Mitochondrion                           | Enzyme: Oxidoreductase              | Metabolism;Energy pathways                                       | TM                     | Yes                      |
| CNGA1       | 1259    | cGMP-gated cation channel alpha-1 isoform 1                                | NP_001136036.1    | 2          | 1                 | 1          | 1      | 1.3                                                      | 0.49                                                     |                                                                                        |                                                                                        |                                                                                               |                                                                                               | 1                                                                              | 1                                                                              | 445     | 1259           | cyclic nucleotide-gated channel alpha 1                                                                                                                               | Intracellular ligand-gated ion channel activity | Plasma membrane                         | Intracellular ligand-gated channel  | Transport                                                        | TM;CNMP;CC             | Yes                      |
| CLINT1      | 9685    | clathrin interactor 1 isoform 1                                            | NP_001182484.1    | 2          | 1                 | 11         | 30     | 1.29                                                     | 0.4                                                      |                                                                                        |                                                                                        |                                                                                               |                                                                                               | 1                                                                              | 1                                                                              | 6273    | 9685           | None                                                                                                                                                                  | Transporter activity                            | Golgi apparatus;Nucleus;Cytoplasm       | Transport/cargo protein             | Transport                                                        | CC                     | Yes                      |
| ADAMDEC1    | 27299   | ADAM DEC1 isoform 1 precursor                                              | NP_055294.1       | 2          | 1                 | 1          | 1      | 1.25                                                     | 0.48                                                     |                                                                                        |                                                                                        |                                                                                               |                                                                                               | 1                                                                              | 1                                                                              | 7070    | 27299          | ADAM-like, decysin 1                                                                                                                                                  | Metalloprotease activity                        | Extracellular                           | Metalloprotease                     | Cell communication;Signal transduction                           | SP;REP;DISINT          | Yes                      |
| OSBPL1      | 114885  | oxysterol-binding protein-related protein 11                               | NP_073613.2       | 1          | 2                 | 3          | 5      | 1.25                                                     | 0.37                                                     |                                                                                        |                                                                                        |                                                                                               |                                                                                               | 1                                                                              | 1                                                                              | 9481    | 114885         | oxysterol binding protein-like 11                                                                                                                                     | Transporter activity                            | Cytoplasm                               | Transport/cargo protein             | Transport                                                        | PH                     | Yes                      |
| FAM3D       | 131177  | protein FAM3D precursor                                                    | NP_620160.1       | 1          | 1                 | 1          | 2      | 1.24                                                     | 0.44                                                     | 3.48                                                                                   | 53.87                                                                                  | 6.1                                                                                           | 34.9                                                                                          | 2                                                                              | 2                                                                              | 12271   | 131177         | family with sequence similarity 3, member D                                                                                                                           | Cytokine activity                               | Extracellular                           | Cytokine                            | Cell communication;Signal transduction                           | SP                     | Yes                      |
| PLG         | 5340    | plasminogen isoform 1 precursor                                            | NP_000292.1       | 1          | 1                 | 1          | 4      | 1.23                                                     | 0.48                                                     | 11.65                                                                                  | 97.85                                                                                  | 20.5                                                                                          | 73.7                                                                                          | 2                                                                              | 2                                                                              | 1417    | 5340           | plasminogen                                                                                                                                                           | Peptidase activity                              | Extracellular                           | Protease                            | Protein metabolism                                               | PAN;KRINGLE;TRYPSIN;SP | Yes                      |
| GLIPR2      | 152007  | Golgi-associated plant pathogenesis-related protein 1 isoform e            | NP_001273942.1    | 4          | 1                 | 1          | 1      | 1.22                                                     | 0.48                                                     |                                                                                        |                                                                                        |                                                                                               |                                                                                               | 1                                                                              | 1                                                                              | 6187    | 152007         | chromosome 9 open reading frame 19                                                                                                                                    | Molecular function unknown                      | -                                       | Unclassified                        | Biological_process unknown                                       | SCP                    | Yes                      |
| GPA33       | 10223   | cell surface A33 antigen precursor                                         | NP_005805.1       | 1          | 1                 | 1          | 1      | 1.21                                                     | 0.43                                                     |                                                                                        |                                                                                        |                                                                                               |                                                                                               | 1                                                                              | 1                                                                              | 3704    | 10223          | glycoprotein A33 (transmembrane)                                                                                                                                      | Antigen binding                                 | Plasma membrane                         | Immunoglobulin                      | Immune response                                                  | IGV;Ig_LIKE;TM         | Yes                      |
| POSTN       | 10631   | periostin isoform 1 precursor                                              | NP_006466.2       | 7          | 3                 | 3          | 30     | 1.21                                                     | 0.17                                                     | 7.55                                                                                   | 109.04                                                                                 | 35.2                                                                                          | 80.8                                                                                          | 14                                                                             | 14                                                                             | 12295   | 10631          | periostin, osteoblast specific factor                                                                                                                                 | Cell adhesion molecule activity                 | -                                       | Adhesion molecule                   | Cell communication;Signal transduction                           | SP                     | Yes                      |

Supplementary Table S1. List of quantified proteins in OKF6/TERT1-Smoke cells  
 Raingopaln *et al.*, 2017. Role of protein kinase N2 (PKN2) in cigarette smoke-mediated oncogenic transformation of oral cells

| Gene Symbol | Gene ID | Protein Description                                                    | Protein Accession | # Proteins | # Unique Peptides | # Peptides | # PSMs | OKF6/TERT1-Smoke/<br>OKF6/TERT1-Parental<br>(130/126) R1 | OKF6/TERT1-Smoke/<br>OKF6/TERT1-Parental<br>(128/127) R2 | Ratio Standard Errors [%]:<br>OKF6/TERT1-Smoke/<br>OKF6/TERT1-Parental<br>(130/126) R1 | Ratio Standard Errors [%]:<br>OKF6/TERT1-Smoke/<br>OKF6/TERT1-Parental<br>(128/127) R2 | Ratio Variabilities [%]:<br>F13: OKF6/TERT1-<br>Smoke/<br>OKF6/TERT1-Parental<br>(130/126) R1 | Ratio Variabilities [%]:<br>F13: OKF6/TERT1-<br>Smoke/<br>OKF6/TERT1-Parental<br>(128/127) R2 | Ratio Counts: F13:<br>OKF6/TERT1-Smoke/<br>OKF6/TERT1-Parental<br>(130/126) R1 | Ratio Counts: F13:<br>OKF6/TERT1-Smoke/<br>OKF6/TERT1-Parental<br>(128/127) R2 | HPRD ID | Entrez Gene ID | Gene Name                                                                 | Molecular Function                          | Primary Localization      | Molecular Class                  | Biological Process                                                           | Domains          | Plasma Proteome Database |
|-------------|---------|------------------------------------------------------------------------|-------------------|------------|-------------------|------------|--------|----------------------------------------------------------|----------------------------------------------------------|----------------------------------------------------------------------------------------|----------------------------------------------------------------------------------------|-----------------------------------------------------------------------------------------------|-----------------------------------------------------------------------------------------------|--------------------------------------------------------------------------------|--------------------------------------------------------------------------------|---------|----------------|---------------------------------------------------------------------------|---------------------------------------------|---------------------------|----------------------------------|------------------------------------------------------------------------------|------------------|--------------------------|
| MYOP        | 339344  | myb-related transcription factor, partner of profilin                  | NP_001012661.1    | 1          | 1                 | 1          | 2      | 1.2                                                      | 0.37                                                     |                                                                                        |                                                                                        |                                                                                               |                                                                                               | 1                                                                              | 1                                                                              | 17352   | 339344         | None                                                                      | Transcription factor activity               | Nucleus                   | Transcription factor             | Regulation of nucleobase, nucleoside, nucleotide and nucleic acid metabolism | SANT             | No                       |
| WDFY1       | 57590   | WD repeat and FYVE domain-containing protein 1                         | NP_065881.1       | 1          | 2                 | 2          | 3      | 1.19                                                     | 0.48                                                     |                                                                                        |                                                                                        |                                                                                               |                                                                                               | 1                                                                              | 1                                                                              | 15663   | 57590          | WD repeat and FYVE domain containing 1                                    | Molecular function unknown                  | Endosome                  | Unclassified                     | Biological process unknown                                                   | WD40:FYVE        | Yes                      |
| KRT3        | 3850    | keratin, type II cytoskeletal 3                                        | NP_476429.2       | 2          | 3                 | 11         | 64     | 1.16                                                     | 0.11                                                     | 11.07                                                                                  | 582.62                                                                                 | 44.7                                                                                          | 875.9                                                                                         | 11                                                                             | 11                                                                             | 1013    | 3850           | keratin 3                                                                 | Structural constituent of cytoskeleton      | Cytoplasm                 | Cytoskeletal protein             | Cell growth and/or maintenance                                               | CC               | Yes                      |
| BGN         | 633     | biglycan preproprotein                                                 | NP_001702.1       | 1          | 2                 | 2          | 22     | 1.13                                                     | 0.42                                                     | 9.07                                                                                   | 43.48                                                                                  | 29.6                                                                                          | 55.4                                                                                          | 8                                                                              | 8                                                                              | 2359    | 633            | biglycan                                                                  | Extracellular matrix structural constituent | Extracellular             | Extracellular matrix protein     | Cell growth and/or maintenance                                               | LRR:SP           | Yes                      |
| CLMN        | 79789   | calmin                                                                 | NP_079010.2       | 1          | 2                 | 2          | 3      | 1.06                                                     | 0.44                                                     |                                                                                        |                                                                                        |                                                                                               |                                                                                               | 1                                                                              | 1                                                                              | 13076   | 79789          | calmin (calponin-like transmembrane)                                      | Molecular function unknown                  | Integral to membrane      | Integral membrane protein        | Biological process unknown                                                   | CH:TM            | Yes                      |
| MRPL10      | 124995  | 39S ribosomal protein L10, mitochondrial isoform b                     | NP_683685.1       | 2          | 3                 | 3          | 6      | 1.03                                                     | 0.5                                                      | 12.05                                                                                  | 41.34                                                                                  | 21.7                                                                                          | 37                                                                                            | 3                                                                              | 3                                                                              | 14738   | 124995         | mitochondrial ribosomal protein L10                                       | Structural constituent of ribosome          | Mitochondrion             | RNA binding protein              | Protein metabolism                                                           | -                | No                       |
| MRPL12      | 6182    | 39S ribosomal protein L12, mitochondrial                               | NP_002940.2       | 1          | 5                 | 5          | 32     | 1.03                                                     | 0.45                                                     | 7.28                                                                                   | 53.26                                                                                  | 27.5                                                                                          | 104.5                                                                                         | 13                                                                             | 13                                                                             | 3849    | 6182           | mitochondrial ribosomal protein L12                                       | Structural constituent of ribosome          | Mitochondrion             | Ribosomal subunit                | Regulation of nucleobase, nucleoside, nucleotide and nucleic acid metabolism | -                | Yes                      |
| GPATCH8     | 23131   | G patch domain-containing protein 8 isoform 1                          | NP_001002909.1    | 3          | 4                 | 4          | 5      | 1.02                                                     | 0.49                                                     | 11.13                                                                                  | 6.14                                                                                   | 19.8                                                                                          | 5.2                                                                                           | 3                                                                              | 3                                                                              | 11089   | 23131          | None                                                                      | Molecular function unknown                  | Nucleus                   | Unclassified                     | Biological process unknown                                                   | G_PATCH:ZNF2:CC  | Yes                      |
| JCHAIN      | 3512    | immunoglobulin J chain precursor                                       | NP_653247.1       | 1          | 1                 | 1          | 8      | 1.02                                                     | 0.33                                                     | 2.37                                                                                   | 47.11                                                                                  | 4.8                                                                                           | 31.6                                                                                          | 4                                                                              | 4                                                                              |         |                |                                                                           |                                             |                           |                                  |                                                                              |                  |                          |
| PRELP       | 5549    | prolargin precursor                                                    | NP_002716.1       | 1          | 2                 | 2          | 3      | 1.01                                                     | 0.5                                                      | 19.17                                                                                  | 5.72                                                                                   | 27.9                                                                                          | 4.1                                                                                           | 2                                                                              | 2                                                                              | 3556    | 5549           | proline arginine-rich end leucine-rich repeat protein                     | Cytoskeletal anchoring activity             | Extracellular matrix      | Anchor protein                   | Cell growth and/or maintenance                                               | LRR:SP           | Yes                      |
| MYL9        | 10398   | myosin regulatory light polypeptide 9 isoform a                        | NP_006088.2       | 2          | 1                 | 6          | 68     | 1.01                                                     | 0.45                                                     |                                                                                        |                                                                                        |                                                                                               |                                                                                               | 1                                                                              | 1                                                                              | 17619   | 10398          | myosin, light polypeptide 9, regulatory                                   | Molecular function unknown                  | -                         | Unclassified                     | Muscle contraction                                                           | EF               | Yes                      |
| ACTA1       | 58      | actin, alpha skeletal muscle                                           | NP_001091.1       | 1          | 1                 | 26         | 727    | 0.99                                                     | 0.44                                                     | 6.73                                                                                   | 48.86                                                                                  | 19                                                                                            | 67                                                                                            | 8                                                                              | 8                                                                              | 30      | 58             | actin, alpha 1, skeletal muscle                                           | Structural molecule activity                | Cytoplasm                 | Structural protein               | Cell growth and/or maintenance                                               | ACTIN            | Yes                      |
| SLC39A14    | 23516   | zinc transporter ZIP14 isoform b precursor                             | NP_056174.2       | 3          | 1                 | 1          | 2      | 0.99                                                     | 0.34                                                     |                                                                                        |                                                                                        |                                                                                               |                                                                                               | 1                                                                              | 1                                                                              | 12288   | 23516          | solute carrier family 39 (zinc transporter), member 14                    | Transporter activity                        | Plasma membrane           | Transport/cargo protein          | Transport                                                                    | TM               | Yes                      |
| HBD         | 3045    | hemoglobin subunit delta                                               | NP_000510.1       | 1          | 1                 | 2          | 24     | 0.96                                                     | 0.26                                                     | 12.39                                                                                  | 127.02                                                                                 | 27.1                                                                                          | 85.4                                                                                          | 5                                                                              | 5                                                                              | 787     | 3045           | hemoglobin, delta                                                         | Transporter activity                        | -                         | Transport/cargo protein          | Transport                                                                    | -                | Yes                      |
| FLII        | 2314    | protein flightless-1 homolog isoform 3                                 | NP_001243194.1    | 2          | 1                 | 35         | 94     | 0.9                                                      | 0.5                                                      | 7.72                                                                                   | 13.42                                                                                  | 9.8                                                                                           | 9.4                                                                                           | 2                                                                              | 2                                                                              | 2647    | 2314           | flightless-1 homolog (Drosophila)                                         | Cytoskeletal protein binding                | Nucleus                   | Cytoskeletal associated protein  | Cell growth and/or maintenance                                               | GEL:CC:LRR       | Yes                      |
| MCM10       | 55388   | protein MCM10 homolog isoform 1                                        | NP_877428.1       | 2          | 1                 | 1          | 1      | 0.89                                                     | 0.26                                                     |                                                                                        |                                                                                        |                                                                                               |                                                                                               | 1                                                                              | 1                                                                              | 11297   | 55388          | MCM10 minichromosome maintenance deficient 10(S. cerevisiae)              | DNA binding                                 | Nucleus                   | DNA binding protein              | Regulation of nucleobase, nucleoside, nucleotide and nucleic acid metabolism | CC               | No                       |
| MPV17       | 4358    | protein Mpv17                                                          | NP_002428.1       | 1          | 1                 | 1          | 9      | 0.85                                                     | 0.31                                                     | 27.68                                                                                  | 2.75                                                                                   | 42.3                                                                                          | 1.2                                                                                           | 3                                                                              | 2                                                                              | 8847    | 4358           | MpV17 transgene, murine homolog, glomerular sclerosis                     | Molecular function unknown                  | Peroxisome; Mitochondrion | Integral membrane protein        | Biological process unknown                                                   | TM               | Yes                      |
| TCEB2       | 6923    | transcription elongation factor B polypeptide 2 isoform a              | NP_009039.1       | 2          | 5                 | 5          | 11     | 0.84                                                     | 0.49                                                     | 11.34                                                                                  | 23.28                                                                                  | 25.6                                                                                          | 30.9                                                                                          | 7                                                                              | 7                                                                              | 2874    | 6923           | transcription elongation factor B (SII), polypeptide 2 (18kDa, elongin B) | Transcription regulator activity            | Nucleus                   | Transcription regulatory protein | Regulation of nucleobase, nucleoside, nucleotide and nucleic acid metabolism | UBQ              | Yes                      |
| PIK3CG      | 5294    | phosphatidylinositol 3-kinase catalytic subunit gamma isoform          | NP_002640.2       | 1          | 1                 | 1          | 2      | 0.84                                                     | 0.4                                                      |                                                                                        |                                                                                        |                                                                                               |                                                                                               | 1                                                                              | 1                                                                              | 3135    | 5294           | phosphoinositide-3-kinase, catalytic, gamma polypeptide                   | Lipid kinase activity                       | Plasma membrane           | Lipid Kinase                     | Cell communication, Signal transduction                                      | PI3K2:PEKKA:PEKB | Yes                      |
| VTHA        | 143187  | vesicle transport through interaction with t-SNAREs homolog 1A         | NP_660207.2       | 1          | 1                 | 1          | 1      | 0.83                                                     | 0.48                                                     |                                                                                        |                                                                                        |                                                                                               |                                                                                               | 1                                                                              | 1                                                                              | 18290   | 143187         | vesicle transport through interaction with t-SNAREs homolog 1A (yeast)    | Transporter activity                        | Integral to membrane      | Transport/cargo protein          | Transport                                                                    | _SNARE:CC:TM     | Yes                      |
| MPG         | 4350    | DNA-3-methyladenine glycosylase isoform a                              | NP_002425.2       | 3          | 1                 | 1          | 2      | 0.81                                                     | 0.44                                                     |                                                                                        |                                                                                        |                                                                                               |                                                                                               | 1                                                                              | 1                                                                              | 6766    | 4350           | N-methylpurine-DNA glycosylase                                            | Hydrolase activity                          | Nucleus                   | Enzyme: Glycosylase              | DNA repair                                                                   | TM               | Yes                      |
| SRSF2       | 6427    | serine/arginine-rich splicing factor 2                                 | NP_003007.2       | 1          | 2                 | 2          | 11     | 0.79                                                     | 0.47                                                     | 35.44                                                                                  | 51.7                                                                                   | 60.8                                                                                          | 51.4                                                                                          | 4                                                                              | 4                                                                              |         |                |                                                                           |                                             |                           |                                  |                                                                              |                  |                          |
| ZBTB45      | 84878   | zinc finger and BTB domain-containing protein 45                       | NP_116181.1       | 1          | 1                 | 1          | 1      | 0.79                                                     | 0.31                                                     |                                                                                        |                                                                                        |                                                                                               |                                                                                               | 1                                                                              | 1                                                                              | 15808   | 84878          | zinc finger protein 499                                                   | Molecular function unknown                  | Nucleus                   | Unclassified                     | Regulation of nucleobase, nucleoside, nucleotide and nucleic acid metabolism | ZNF2:BTB         | Yes                      |
| CD99        | 4267    | CD99 antigen isoform a precursor                                       | NP_002405.1       | 2          | 1                 | 1          | 2      | 0.78                                                     | 0.46                                                     |                                                                                        |                                                                                        |                                                                                               |                                                                                               | 1                                                                              | 1                                                                              | 2434    | 4267           | CD99 antigen                                                              | Molecular function unknown                  | Integral to membrane      | Unclassified                     | Immune response                                                              | SP:TM            | Yes                      |
| S100A2      | 6273    | protein S100-A2                                                        | NP_005969.1       | 1          | 6                 | 6          | 28     | 0.78                                                     | 0.44                                                     | 17.38                                                                                  | 34.99                                                                                  | 60.5                                                                                          | 70.1                                                                                          | 17                                                                             | 17                                                                             | 1508    | 6273           | S100 calcium binding protein A2                                           | Calcium ion binding                         | Nucleus                   | Calcium binding protein          | Cell communication, Signal transduction                                      | EF               | Yes                      |
| MUC5AC      | 4586    | mucin-5AC precursor                                                    | NP_001291288.1    | 1          | 1                 | 1          | 1      | 0.78                                                     | 0.36                                                     |                                                                                        |                                                                                        |                                                                                               |                                                                                               | 1                                                                              | 1                                                                              |         |                |                                                                           |                                             |                           |                                  |                                                                              |                  |                          |
| NEMF        | 9147    | nuclear export mediator factor NEMF isoform 1                          | NP_004704.2       | 2          | 1                 | 1          | 1      | 0.77                                                     | 0.5                                                      |                                                                                        |                                                                                        |                                                                                               |                                                                                               | 1                                                                              | 1                                                                              |         |                |                                                                           |                                             |                           |                                  |                                                                              |                  |                          |
| CLH1        | 130162  | clathrin heavy chain linker domain-containing protein 1 isoform 1      | NP_689598.2       | 2          | 1                 | 1          | 1      | 0.77                                                     | 0.39                                                     |                                                                                        |                                                                                        |                                                                                               |                                                                                               | 1                                                                              | 1                                                                              |         |                |                                                                           |                                             |                           |                                  |                                                                              |                  |                          |
| HBB         | 3043    | hemoglobin subunit beta                                                | NP_000509.1       | 1          | 1                 | 2          | 451    | 0.76                                                     | 0.3                                                      | 3.03                                                                                   | 12.43                                                                                  | 34.2                                                                                          | 58.2                                                                                          | 207                                                                            | 207                                                                            | 786     | 3043           | hemoglobin, beta                                                          | Transporter activity                        | Extracellular             | Transport/cargo protein          | Transport                                                                    | -                | Yes                      |
| ACSF3       | 197322  | acyl-CoA synthetase family member 3, mitochondrial isoform 1 precursor | NP_777577.2       | 2          | 4                 | 4          | 8      | 0.75                                                     | 0.5                                                      | 22.25                                                                                  | 42.78                                                                                  | 34.5                                                                                          | 44.8                                                                                          | 4                                                                              | 4                                                                              | 14117   | 197322         | None                                                                      | Molecular function unknown                  | -                         | Unclassified                     | Biological process unknown                                                   | SP               | No                       |

Supplementary Table S1. List of quantified proteins in OKF6/TERT1-Smoke cells  
 Raigopaln *et al.*, 2017. Role of protein kinase N2 (PKN2) in cigarette smoke-mediated oncogenic transformation of oral cells

| Gene Symbol | Gene ID | Protein Description                                                                          | Protein Accession | # Proteins | # Unique Peptides | # Peptides | # PSMs | OKF6/TERT1-Smoke/<br>OKF6/TERT1-Parental<br>(130/126) R1 | OKF6/TERT1-Smoke/<br>OKF6/TERT1-Parental<br>(128/127) R2 | Ratio Standard Errors [%]:<br>OKF6/TERT1-Smoke/<br>OKF6/TERT1-Parental<br>(130/126) R1 | Ratio Standard Errors [%]:<br>OKF6/TERT1-Smoke/<br>OKF6/TERT1-Parental<br>(128/127) R2 | Ratio Variabilities [%]:<br>F13: OKF6/TERT1-<br>Smoke/<br>OKF6/TERT1-Parental<br>(130/126) R1 | Ratio Variabilities [%]:<br>F13: OKF6/TERT1-<br>Smoke/<br>OKF6/TERT1-Parental<br>(128/127) R2 | Ratio Counts: F13:<br>OKF6/TERT1-Smoke/<br>OKF6/TERT1-Parental<br>(130/126) R1 | Ratio Counts: F13:<br>OKF6/TERT1-Smoke/<br>OKF6/TERT1-Parental<br>(128/127) R2 | HPRD ID | Entrez Gene ID | Gene Name                                                              | Molecular Function                            | Primary Localization | Molecular Class                                 | Biological Process                                               | Domains        | Plasma Proteome Database |
|-------------|---------|----------------------------------------------------------------------------------------------|-------------------|------------|-------------------|------------|--------|----------------------------------------------------------|----------------------------------------------------------|----------------------------------------------------------------------------------------|----------------------------------------------------------------------------------------|-----------------------------------------------------------------------------------------------|-----------------------------------------------------------------------------------------------|--------------------------------------------------------------------------------|--------------------------------------------------------------------------------|---------|----------------|------------------------------------------------------------------------|-----------------------------------------------|----------------------|-------------------------------------------------|------------------------------------------------------------------|----------------|--------------------------|
| RPS27L      | 51065   | 40S ribosomal protein S27-like                                                               | NP_057004.1       | 1          | 1                 | 3          | 23     | 0.75                                                     | 0.45                                                     |                                                                                        |                                                                                        |                                                                                               |                                                                                               | 1                                                                              | 1                                                                              | 18003   | 51065          | ribosomal protein S27-like                                             | Molecular function unknown                    | Ribosome             | Unclassified                                    | Biological process unknown                                       | -              | No                       |
| VMP1        | 81671   | vacuole membrane protein 1                                                                   | NP_112200.2       | 1          | 1                 | 1          | 6      | 0.74                                                     | 0.4                                                      | 14.96                                                                                  | 21                                                                                     | 19.4                                                                                          | 11.8                                                                                          | 3                                                                              | 2                                                                              |         |                |                                                                        |                                               |                      |                                                 |                                                                  |                |                          |
| SNX33       | 257364  | sorting nexin-33                                                                             | NP_695003.1       | 1          | 2                 | 2          | 3      | 0.74                                                     | 0.34                                                     | 2.8                                                                                    |                                                                                        | 2.9                                                                                           |                                                                                               | 2                                                                              | 1                                                                              | 11331   | 257364         | None                                                                   | Molecular function unknown                    | -                    | Unclassified                                    | Cell communication;Signal transduction                           | SH3;PX         | Yes                      |
| MAL2        | 114569  | protein MAL2                                                                                 | NP_443118.1       | 1          | 1                 | 1          | 1      | 0.74                                                     | 0.31                                                     |                                                                                        |                                                                                        |                                                                                               |                                                                                               | 1                                                                              | 1                                                                              | 14351   | 114569         | mal, T-cell differentiation protein 2                                  | Transporter activity                          | Endosome             | Transport/cargo protein                         | Transport                                                        | TM             | Yes                      |
| MANBAL      | 63905   | protein MANBAL                                                                               | NP_071360.1       | 1          | 1                 | 1          | 2      | 0.73                                                     | 0.47                                                     |                                                                                        |                                                                                        |                                                                                               |                                                                                               | 1                                                                              | 1                                                                              | 14356   | 63905          | mannosidase, beta A, lysosomal-like                                    | Molecular function unknown                    | Integral to membrane | Integral membrane protein;Unclassified          | Biological process unknown                                       | TM             | No                       |
| NDUFB8      | 4714    | NADH dehydrogenase [ubiquinone] beta subcomplex subunit 8, mitochondrial isoform 1 precursor | NP_004995.1       | 3          | 1                 | 1          | 2      | 0.73                                                     | 0.22                                                     |                                                                                        |                                                                                        |                                                                                               |                                                                                               | 1                                                                              | 1                                                                              | 11886   | 4714           | NADH dehydrogenase (ubiquinone) 1 beta subcomplex, 8, 19kDa            | Oxidoreductase activity                       | Mitochondrion        | Enzyme;Oxidoreductase                           | Metabolism;Energy pathways                                       | TM             | Yes                      |
| C8A         | 731     | complement component C8 alpha chain preproprotein                                            | NP_000553.1       | 1          | 1                 | 1          | 1      | 0.72                                                     | 0.09                                                     |                                                                                        |                                                                                        |                                                                                               |                                                                                               | 1                                                                              | 1                                                                              | 409     | 731            | complement component 8, alpha polypeptide                              | Complement activity                           | Extracellular        | Complement protein                              | Immune response                                                  | TSP1;DLA;SP    | Yes                      |
| VPS13A      | 23230   | vacuolar protein sorting-associated protein 13A isoform A                                    | NP_150648.2       | 4          | 2                 | 2          | 2      | 0.71                                                     | 0.48                                                     |                                                                                        |                                                                                        |                                                                                               |                                                                                               | 1                                                                              | 1                                                                              | 5814    | 23230          | vacuolar protein sorting 13A (yeast)                                   | Transporter activity                          | -                    | Transport/cargo protein                         | Protein metabolism;Transport                                     | CC             | Yes                      |
| S100A11     | 6282    | protein S100-A11                                                                             | NP_005611.1       | 1          | 6                 | 6          | 32     | 0.7                                                      | 0.47                                                     | 10.24                                                                                  | 22.72                                                                                  | 31.1                                                                                          | 47.6                                                                                          | 18                                                                             | 18                                                                             | 4385    | 6282           | S100 calcium binding protein A11 (calgizzarin)                         | Calcium ion binding                           | Cytoplasm            | Calcium binding protein                         | Cell communication;Signal transduction                           | EF             | Yes                      |
| VPS18       | 57617   | vacuolar protein sorting-associated protein 18 homolog                                       | NP_065908.1       | 1          | 2                 | 2          | 4      | 0.7                                                      | 0.44                                                     | 37.25                                                                                  | 36.27                                                                                  | 38.3                                                                                          | 23                                                                                            | 2                                                                              | 2                                                                              | 9776    | 57617          | vacuolar protein sorting protein 18                                    | Transporter activity                          | Cytoplasm            | Transport/cargo protein                         | Transport                                                        | CC             | Yes                      |
| IFIH1       | 64135   | interferon-induced helicase C domain-containing protein 1                                    | NP_071451.2       | 1          | 2                 | 2          | 12     | 0.7                                                      | 0.38                                                     | 23.96                                                                                  | 110.79                                                                                 | 43.1                                                                                          | 120                                                                                           | 6                                                                              | 5                                                                              | 9507    | 64135          | interferon induced with helicase C domain 1                            | ATPase activity                               | Cytoplasm            | ATPase                                          | Regulation of nucleobase, nucleotide and nucleic acid metabolism | DEXDc;HELIC    | No                       |
| KRT19       | 3880    | keratin, type I cytoskeletal 19                                                              | NP_002267.2       | 2          | 26                | 40         | 412    | 0.67                                                     | 0.34                                                     | 5.17                                                                                   | 17.85                                                                                  | 43.8                                                                                          | 86.2                                                                                          | 147                                                                            | 147                                                                            | 1007    | 3880           | keratin 19                                                             | Structural constituent of cytoskeleton        | Cytoplasm            | Cytoskeletal protein                            | Cell growth and/or maintenance                                   | CC             | Yes                      |
| RNF170      | 81790   | E3 ubiquitin-protein ligase RNF170 isoform A                                                 | NP_001153695.1    | 2          | 1                 | 1          | 2      | 0.66                                                     | 0.5                                                      |                                                                                        |                                                                                        |                                                                                               |                                                                                               | 1                                                                              | 1                                                                              | 13165   | 81790          | ring finger protein 170                                                | Molecular function unknown                    | -                    | Unclassified                                    | Biological process unknown                                       | SP;RING;TM     | No                       |
| LPCAT2      | 54947   | lysophosphatidylcholine acyltransferase 2                                                    | NP_060309.2       | 1          | 2                 | 2          | 4      | 0.66                                                     | 0.45                                                     | 20.96                                                                                  | 133.46                                                                                 | 19.6                                                                                          | 101.8                                                                                         | 2                                                                              | 2                                                                              | 7913    | 54947          | None                                                                   | Molecular function unknown                    | -                    | Unclassified                                    | Biological process unknown                                       | PISC;EF;TM     | No                       |
| MARK1       | 4139    | serine/threonine-protein kinase MARK1 isoform 2                                              | NP_061203.3       | 7          | 2                 | 5          | 10     | 0.65                                                     | 0.38                                                     | 0.57                                                                                   | 95.97                                                                                  | 0.5                                                                                           | 54.7                                                                                          | 2                                                                              | 2                                                                              | 7353    | 4139           | MAP/microtubule affinity-regulating kinase 1                           | Protein serine/threonine kinase activity      | Cytoplasm            | Serine/threonine kinase                         | Cell communication;Signal transduction                           | S_T_kinase;UBA | No                       |
| PLGRKT      | 55848   | glucagon receptor (RGT)                                                                      | NP_060935.2       | 1          | 1                 | 1          | 1      | 0.65                                                     | 0.34                                                     |                                                                                        |                                                                                        |                                                                                               |                                                                                               | 1                                                                              | 1                                                                              |         |                |                                                                        |                                               |                      |                                                 |                                                                  |                |                          |
| DYNLL2      | 140735  | dynein light chain 2, cytoplasmic                                                            | NP_542408.1       | 1          | 3                 | 4          | 8      | 0.64                                                     | 0.48                                                     | 2.86                                                                                   | 68.78                                                                                  | 3.2                                                                                           | 62.4                                                                                          | 3                                                                              | 3                                                                              | 6489    | 140735         | None                                                                   | Motor activity                                | Cytoplasm            | Motor protein                                   | Cell growth and/or maintenance                                   | -              | No                       |
| CLTB        | 1212    | clathrin light chain B isoform b                                                             | NP_009028.1       | 2          | 6                 | 6          | 22     | 0.64                                                     | 0.47                                                     | 3.18                                                                                   | 7.3                                                                                    | 6.8                                                                                           | 11.4                                                                                          | 11                                                                             | 11                                                                             | 352     | 1212           | clathrin, light polypeptide (Lcbt)                                     | Structural molecule activity                  | Cytoplasm            | Structural protein                              | Cell growth and/or maintenance                                   | -              | Yes                      |
| IFTM3       | 10410   | interferon-induced transmembrane protein 3                                                   | NP_066362.2       | 3          | 2                 | 2          | 5      | 0.63                                                     | 0.45                                                     | 59.05                                                                                  | 62.03                                                                                  | 56.2                                                                                          | 41.4                                                                                          | 2                                                                              | 2                                                                              | 5719    | 10410          | interferon induced transmembrane protein 3 (1-8U)                      | Molecular function unknown                    | Plasma membrane      | Integral membrane protein                       | Immune response                                                  | TM             | No                       |
| PHLPP1      | 23239   | PH domain leucine-rich repeat-containing protein phosphatase 1                               | NP_919431.2       | 1          | 1                 | 1          | 1      | 0.63                                                     | 0.31                                                     |                                                                                        |                                                                                        |                                                                                               |                                                                                               | 1                                                                              | 1                                                                              | 15145   | 23239          | PH domain and leucine rich repeat protein phosphatase                  | Molecular function unknown                    | Nucleus              | Unclassified                                    | Cell communication;Signal transduction                           | PHLRR;PP2C;LZ  | No                       |
| SLC37A2     | 219855  | sugar phosphate exchanger 2 isoform 1                                                        | NP_938018.1       | 1          | 1                 | 1          | 1      | 0.6                                                      | 0.44                                                     |                                                                                        |                                                                                        |                                                                                               |                                                                                               | 1                                                                              | 1                                                                              | 15380   | 219855         | solute carrier family 37 (glycerol 3-phosphate transporters), member 2 | Auxiliary transport protein activity          | Integral to membrane | Membrane transport protein                      | Transport                                                        | TM             | No                       |
| CBR4        | 84869   | carboxyl reductase family member 4                                                           | NP_116172.2       | 1          | 1                 | 1          | 2      | 0.58                                                     | 0.44                                                     |                                                                                        |                                                                                        |                                                                                               |                                                                                               | 1                                                                              | 1                                                                              | 7859    | 84869          | None                                                                   | Molecular function unknown                    | -                    | Unclassified                                    | Biological process unknown                                       | KRINGLE        | No                       |
| SMN1        | 6606    | survival motor neuron protein isoform d                                                      | NP_000335.1       | 4          | 2                 | 2          | 2      | 0.57                                                     | 0.45                                                     | 140.48                                                                                 | 189.19                                                                                 | 159.3                                                                                         | 184.2                                                                                         | 2                                                                              | 2                                                                              | 2646    | 6606           | survival of motor neuron 1, telomeric                                  | RNA binding                                   | Cytoplasm            | RNA binding protein                             | Regulation of nucleobase, nucleotide and nucleic acid metabolism | TUDOR          | Yes                      |
| CD82        | 3732    | CD82 antigen isoform 1                                                                       | NP_002222.1       | 1          | 1                 | 1          | 1      | 0.57                                                     | 0.42                                                     |                                                                                        |                                                                                        |                                                                                               |                                                                                               | 1                                                                              | 1                                                                              | 9004    | 3732           | CD82 antigen                                                           | Receptor activity;Receptor regulator activity | Plasma membrane      | Integral membrane protein;Cell surface receptor | Cell communication;Signal transduction                           | TM             | Yes                      |
| SLC35F6     | 54978   | solute carrier family 35 member F6 precursor                                                 | NP_060347.2       | 1          | 2                 | 2          | 3      | 0.57                                                     | 0.32                                                     | 14.96                                                                                  | 155.82                                                                                 | 12.1                                                                                          | 78.8                                                                                          | 2                                                                              | 2                                                                              |         |                |                                                                        |                                               |                      |                                                 |                                                                  |                |                          |
| KRT4        | 3851    | keratin, type II cytoskeletal 4                                                              | NP_002263.3       | 1          | 2                 | 4          | 63     | 0.56                                                     | 0.27                                                     | 42.64                                                                                  | 135.31                                                                                 | 104.8                                                                                         | 211.7                                                                                         | 13                                                                             | 13                                                                             | 478     | 3851           | keratin 4                                                              | Structural constituent of cytoskeleton        | Cytoplasm            | Cytoskeletal protein                            | Cell growth and/or maintenance                                   | CC             | Yes                      |
| TACSTD2     | 4070    | tumor-associated calcium signal transducer 2 precursor                                       | NP_002344.2       | 1          | 7                 | 7          | 23     | 0.55                                                     | 0.5                                                      | 21.91                                                                                  | 33.1                                                                                   | 41.6                                                                                          | 59.2                                                                                          | 11                                                                             | 11                                                                             | 672     | 4070           | tumor-associated calcium signal transducer 2                           | Receptor activity                             | Plasma membrane      | Cell surface receptor                           | Cell communication;Signal transduction                           | THYRO;TM;SP    | Yes                      |
| OCTAD2      | 132299  | OCTA domain-containing protein 2 isoform 1                                                   | NP_001014446.1    | 3          | 6                 | 6          | 26     | 0.54                                                     | 0.48                                                     | 12.69                                                                                  | 19.1                                                                                   | 26.2                                                                                          | 35.5                                                                                          | 14                                                                             | 14                                                                             | 14873   | 132299         | OCTA domain containing 2                                               | Molecular function unknown                    | -                    | Unclassified                                    | Biological process unknown                                       | -              | No                       |
| TPM4        | 7171    | tropomyosin alpha-4 chain isoform Tpm4.lcy                                                   | NP_001138632.1    | 2          | 3                 | 23         | 67     | 0.54                                                     | 0.47                                                     | 10.35                                                                                  | 35.16                                                                                  | 9.6                                                                                           | 29.2                                                                                          | 3                                                                              | 3                                                                              | 11734   | 7171           | tropomyosin 4                                                          | Structural constituent of cytoskeleton        | Cytoskeleton         | Cytoskeletal protein                            | Cell growth and/or maintenance                                   | CC             | Yes                      |
| EFNB1       | 1947    | ephrin-B1 precursor                                                                          | NP_004420.1       | 1          | 6                 | 6          | 10     | 0.53                                                     | 0.49                                                     | 1.27                                                                                   | 40.39                                                                                  | 1.3                                                                                           | 40.8                                                                                          | 4                                                                              | 4                                                                              | 2072    | 1947           | ephrin-B1                                                              | Receptor binding                              | Plasma membrane      | Ligand                                          | Cell communication;Signal transduction                           | SP;TM          | Yes                      |

Supplementary Table S1. List of quantified proteins in OKF6/TERT1-Smoke cells  
 Raigopaln *et al.*, 2017. Role of protein kinase N2 (PKN2) in cigarette smoke-mediated oncogenic transformation of oral cells

| Gene Symbol | Gene ID | Protein Description                                                       | Protein Accession | # Proteins | # Unique Peptides | # Peptides | # PSMs | OKF6/TERT1-Smoke/<br>OKF6/TERT1-Parental<br>(130/126) R1 | OKF6/TERT1-Smoke/<br>OKF6/TERT1-Parental<br>(128/127) R2 | Ratio Standard Errors [%]:<br>OKF6/TERT1-Smoke/<br>OKF6/TERT1-Parental<br>(130/126) R1 | Ratio Standard Errors [%]:<br>OKF6/TERT1-Smoke/<br>OKF6/TERT1-Parental<br>(128/127) R2 | Ratio Variabilities [%]:<br>F13: OKF6/TERT1-<br>Smoke/<br>OKF6/TERT1-Parental<br>(130/126) R1 | Ratio Variabilities [%]:<br>F13: OKF6/TERT1-<br>Smoke/<br>OKF6/TERT1-Parental<br>(128/127) R2 | Ratio Counts: F13:<br>OKF6/TERT1-Smoke/<br>OKF6/TERT1-Parental<br>(130/126) R1 | Ratio Counts: F13:<br>OKF6/TERT1-Smoke/<br>OKF6/TERT1-Parental<br>(128/127) R2 | HPRD ID | Entrez Gene ID | Gene Name                                                                                        | Molecular Function                                           | Primary Localization | Molecular Class                  | Biological Process                                                                          | Domains                | Plasma Proteome Database |
|-------------|---------|---------------------------------------------------------------------------|-------------------|------------|-------------------|------------|--------|----------------------------------------------------------|----------------------------------------------------------|----------------------------------------------------------------------------------------|----------------------------------------------------------------------------------------|-----------------------------------------------------------------------------------------------|-----------------------------------------------------------------------------------------------|--------------------------------------------------------------------------------|--------------------------------------------------------------------------------|---------|----------------|--------------------------------------------------------------------------------------------------|--------------------------------------------------------------|----------------------|----------------------------------|---------------------------------------------------------------------------------------------|------------------------|--------------------------|
| ITH4        | 3700    | inter-alpha-trypsin inhibitor heavy chain H4 isoform 1 precursor          | NP_002209.2       | 2          | 1                 | 1          | 3      | 0.53                                                     | 0.48                                                     |                                                                                        |                                                                                        |                                                                                               |                                                                                               | 1                                                                              | 1                                                                              | 2781    | 3700           | inter-alpha (globulin) inhibitor H4 (plasma kallikrein-sensitive glycoprotein)                   | Protease inhibitor activity                                  | Extracellular        | Protease inhibitor               | Protein metabolism                                                                          | VWA,SP,VIT             | Yes                      |
| SERPINA3    | 12      | alpha-1-antichymotrypsin precursor                                        | NP_001076.2       | 1          | 1                 | 1          | 1      | 0.52                                                     | 0.49                                                     |                                                                                        |                                                                                        |                                                                                               |                                                                                               | 1                                                                              | 1                                                                              | 120     | 12             | serine (or cysteine) proteinase inhibitor, clade A1 (alpha-1-antitrypsin, antitrypsin), member 3 | Protease inhibitor activity                                  | Extracellular        | Protease inhibitor               | Protein metabolism                                                                          | SERPIN,SP              | Yes                      |
| CD9         | 928     | CD9 antigen                                                               | NP_001760.1       | 1          | 2                 | 2          | 7      | 0.52                                                     | 0.43                                                     | 45.63                                                                                  | 76.21                                                                                  | 50                                                                                            | 73.6                                                                                          | 4                                                                              | 4                                                                              | 880     | 928            | CD9 antigen (p24)                                                                                | Molecular function unknown                                   | Cell surface         | Unclassified                     | Immune response                                                                             | TM                     | Yes                      |
| HLA-A       | 3105    | HLA class I histocompatibility antigen, A-1 alpha chain precursor         | NP_002107.3       | 1          | 1                 | 6          | 24     | 0.52                                                     | 0.43                                                     |                                                                                        |                                                                                        |                                                                                               |                                                                                               | 1                                                                              | 1                                                                              | 826     | 3105           | major histocompatibility complex, class I, A                                                     | MHC class I receptor activity;MHC class II receptor activity | Plasma membrane      | MHC complex protein              | Immune response                                                                             | IGC,SP,TM              | Yes                      |
| S100A14     | 57402   | protein S100-A14                                                          | NP_065723.1       | 1          | 7                 | 7          | 30     | 0.51                                                     | 0.45                                                     | 14.88                                                                                  | 22.79                                                                                  | 32.8                                                                                          | 46                                                                                            | 18                                                                             | 18                                                                             | 10467   | 57402          | S100 calcium binding protein A14                                                                 | Calcium ion binding                                          | Cytoplasm            | Calcium binding protein          | Biological process unknown                                                                  | EF                     | Yes                      |
| DSP         | 1832    | desmoplakin isoform 1                                                     | NP_004406.2       | 2          | 106               | 106        | 316    | 0.51                                                     | 0.43                                                     | 5.79                                                                                   | 8.69                                                                                   | 39.4                                                                                          | 51.8                                                                                          | 167                                                                            | 167                                                                            | 513     | 1832           | desmoplakin                                                                                      | Structural constituent of cytoskeleton                       | Cytoplasm            | Cytoskeletal protein             | Cell growth and/or maintenance                                                              | PLEC,CC,SPECTRIN       | Yes                      |
| CEP44       | 80817   | centrosomal protein of 44 kDa isoform b                                   | NP_001138786.1    | 2          | 1                 | 1          | 1      | 0.51                                                     | 0.39                                                     |                                                                                        |                                                                                        |                                                                                               |                                                                                               | 1                                                                              | 1                                                                              |         |                |                                                                                                  |                                                              |                      |                                  |                                                                                             |                        |                          |
| FSIP2       | 401024  | fibrous sheath-interacting protein 2                                      | NP_775922.2       | 1          | 1                 | 1          | 1      | 0.51                                                     | 0.33                                                     |                                                                                        |                                                                                        |                                                                                               |                                                                                               | 1                                                                              | 1                                                                              | 8177    | 285135         | fibrous sheath interacting protein 2                                                             | Molecular function unknown                                   | -                    | Unclassified                     | Biological process unknown                                                                  | CC                     | No                       |
| TMEM57      | 55219   | macolin isoform a                                                         | NP_060672.2       | 2          | 1                 | 1          | 2      | 0.51                                                     | 0.25                                                     |                                                                                        |                                                                                        |                                                                                               |                                                                                               | 1                                                                              | 1                                                                              | 13340   | 55219          | None                                                                                             | Molecular function unknown                                   | Nuclear membrane     | Integral membrane protein        | Biological process unknown                                                                  | CC,ERM,TM              | No                       |
| GAS6        | 2621    | growth arrest-specific protein 6 precursor                                | NP_000811.1       | 1          | 1                 | 1          | 2      |                                                          | 0.47                                                     |                                                                                        |                                                                                        |                                                                                               |                                                                                               |                                                                                | 1                                                                              | 2705    | 2621           | growth arrest-specific 6                                                                         | Growth factor activity                                       | Extracellular        | Growth factor                    | Cell communication;Signal transduction                                                      | GLA,EGFL,EGFCAL,LAG,SP | Yes                      |
| EP400       | 57634   | E1A-binding protein p400                                                  | NP_056224.3       | 1          | 1                 | 1          | 1      | 1.99                                                     | 1.89                                                     |                                                                                        |                                                                                        |                                                                                               |                                                                                               | 1                                                                              | 1                                                                              | 9378    | 57634          | E1A binding protein p400                                                                         | DNA binding                                                  | Nucleus              | DNA binding protein              | Regulation of nucleobase, nucleoside, nucleotide and nucleic acid metabolism                | DEXD,HELIC,C/SANT      | Yes                      |
| RPS6KA5     | 9252    | ribosomal protein S6 kinase alpha-5 isoform a                             | NP_004746.2       | 2          | 1                 | 1          | 1      | 1.99                                                     | 0.71                                                     |                                                                                        |                                                                                        |                                                                                               |                                                                                               | 1                                                                              | 1                                                                              | 6789    | 9252           | ribosomal protein S6 kinase, 90kDa, polypeptide 5                                                | Protein serine/threonine kinase activity                     | Nucleus              | Serine/threonine kinase          | Cytokine and chemokine mediated signaling pathway;Regulation of transcription;Transcription | S_T_kinase,NLS         | Yes                      |
| VAT1L       | 57687   | synaptic vesicle membrane protein VAT-1 homolog-like                      | NP_065978.1       | 1          | 1                 | 1          | 2      | 1.98                                                     | 1.98                                                     |                                                                                        |                                                                                        |                                                                                               |                                                                                               | 1                                                                              | 1                                                                              | 13875   | 57687          | None                                                                                             | Molecular function unknown                                   | -                    | Unclassified                     | Biological process unknown                                                                  | -                      | Yes                      |
| LOC642249   | 642249  | uncharacterized protein LOC642249                                         | XP_00672002.1     | 1          | 1                 | 1          | 1      | 1.97                                                     | 1.66                                                     |                                                                                        |                                                                                        |                                                                                               |                                                                                               | 1                                                                              | 1                                                                              |         |                |                                                                                                  |                                                              |                      |                                  |                                                                                             |                        |                          |
| CARKD       | 55739   | ATP-dependent (S)-NAD(P)H-hydrate dehydratase isoform a                   | NP_060680.2       | 4          | 1                 | 1          | 4      | 1.97                                                     | 0.87                                                     | 5.59                                                                                   | 12.58                                                                                  | 15.7                                                                                          | 15.6                                                                                          | 2                                                                              | 2                                                                              | 7698    | 55739          | None                                                                                             | Transporter activity                                         | -                    | Transport/cargo protein          | Metabolism                                                                                  | SP                     | No                       |
| DPEP3       | 64180   | dipeptidase 3 isoform a precursor                                         | NP_071752.3       | 2          | 1                 | 1          | 1      | 1.96                                                     | 0.68                                                     |                                                                                        |                                                                                        |                                                                                               |                                                                                               | 1                                                                              | 1                                                                              | 7012    | 64180          | dipeptidase 3                                                                                    | Peptidase activity                                           | -                    | Protease                         | Protein metabolism                                                                          | SP                     | No                       |
| HCFC2       | 29915   | host cell factor 2                                                        | NP_037452.1       | 1          | 1                 | 1          | 1      | 1.95                                                     | 0.87                                                     |                                                                                        |                                                                                        |                                                                                               |                                                                                               | 1                                                                              | 1                                                                              | 6393    | 29915          | host cell factor C2                                                                              | Transcription regulator activity                             | Nucleus              | Transcription regulatory protein | Regulation of nucleobase, nucleoside, nucleotide and nucleic acid metabolism                | KEICH,FN3              | No                       |
| RBM6        | 10180   | RNA-binding protein 6 isoform 1                                           | NP_005768.1       | 2          | 1                 | 1          | 2      | 1.94                                                     | 0.62                                                     |                                                                                        |                                                                                        |                                                                                               |                                                                                               | 1                                                                              | 1                                                                              | 6054    | 10180          | RNA binding motif protein 6                                                                      | RNA binding                                                  | Nucleus              | RNA binding protein              | Regulation of nucleobase, nucleoside, nucleotide and nucleic acid metabolism                | RRM,G_PATCH,CC         | Yes                      |
| NAA40       | 79829   | N-alpha-acetyltransferase 40 isoform 1                                    | NP_079047.2       | 2          | 2                 | 2          | 3      | 1.93                                                     | 1.65                                                     |                                                                                        |                                                                                        |                                                                                               |                                                                                               | 1                                                                              | 1                                                                              | 7838    | 79829          | None                                                                                             | Molecular function unknown                                   | -                    | Unclassified                     | Metabolism                                                                                  | -                      | No                       |
| DAB2        | 1601    | disabled homolog 2 isoform 1                                              | NP_001334.2       | 2          | 1                 | 1          | 2      | 1.92                                                     | 0.81                                                     |                                                                                        |                                                                                        |                                                                                               |                                                                                               | 1                                                                              | 1                                                                              | 3139    | 1601           | disabled homolog 2, mitogen-responsive phosphoprotein (Drosophila)                               | Receptor signaling complex scaffold activity                 | Cytoplasm            | Adapter molecule                 | Cell communication;Signal transduction                                                      | PTB,CC                 | Yes                      |
| TMEM87A     | 25963   | transmembrane protein 87A isoform 1 precursor                             | NP_056312.2       | 3          | 2                 | 2          | 2      | 1.91                                                     | 0.73                                                     |                                                                                        |                                                                                        |                                                                                               |                                                                                               | 1                                                                              | 1                                                                              | 10895   | 25963          | None                                                                                             | Molecular function unknown                                   | Integral to membrane | Integral membrane protein        | Biological process unknown                                                                  | SP,TM                  | No                       |
| TMM17A      | 10440   | mitochondrial import inner membrane translocase subunit Tim17-A           | NP_006326.1       | 1          | 4                 | 4          | 10     | 1.9                                                      | 1.4                                                      | 9.33                                                                                   | 14.36                                                                                  | 41.1                                                                                          | 47.5                                                                                          | 5                                                                              | 5                                                                              | 5449    | 10440          | translocase of inner mitochondrial membrane 17 homolog A (yeast)                                 | Catalytic activity                                           | Mitochondrion        | Enzyme: Translocase              | Transport                                                                                   | TM                     | Yes                      |
| SRSF6       | 6431    | serine/arginine-rich splicing factor 6                                    | NP_006266.2       | 1          | 5                 | 9          | 18     | 1.89                                                     | 1.58                                                     | 1.7                                                                                    | 9.65                                                                                   | 6.4                                                                                           | 31.1                                                                                          | 4                                                                              | 4                                                                              |         |                |                                                                                                  |                                                              |                      |                                  |                                                                                             |                        |                          |
| COQ5        | 84274   | 2-methoxy-6-polypropyl-1,4-benzoquinol methylase, mitochondrial precursor | NP_115690.3       | 1          | 1                 | 1          | 1      | 1.89                                                     | 1.31                                                     |                                                                                        |                                                                                        |                                                                                               |                                                                                               | 1                                                                              | 1                                                                              | 17560   | 84274          | None                                                                                             | Molecular function unknown                                   | -                    | Unclassified                     | Biological process unknown                                                                  | -                      | No                       |
| DCAF8       | 50717   | DDb1- and CUL4-associated factor 8                                        | NP_056541.2       | 1          | 1                 | 1          | 2      | 1.89                                                     | 1.28                                                     |                                                                                        |                                                                                        |                                                                                               |                                                                                               | 1                                                                              | 1                                                                              | 18300   | 50717          | WD repeat domain 42A                                                                             | Molecular function unknown                                   | Nucleus,Cytoplasm    | Unclassified                     | Biological process unknown                                                                  | CC,WD40                | Yes                      |
| MAFF        | 23764   | transcription factor MafF isoform a                                       | NP_036455.1       | 2          | 1                 | 1          | 2      | 1.89                                                     | 1.14                                                     |                                                                                        |                                                                                        |                                                                                               |                                                                                               | 1                                                                              | 1                                                                              | 5343    | 23764          | v-maf musculoaponeurotic fibrosarcoma oncogene homolog F (avian)                                 | Transcription factor activity;Transcription factor binding   | Nucleus              | Transcription factor             | Regulation of nucleobase, nucleoside, nucleotide and nucleic acid metabolism                | BRLZ,CC                | Yes                      |



Supplementary Table S1. List of quantified proteins in OKF6/TERT1-Smoke cells  
 Raingopaln *et al.*, 2017. Role of protein kinase N2 (PKN2) in cigarette smoke-mediated oncogenic transformation of oral cells

| Gene Symbol | Gene ID | Protein Description                                                                   | Protein Accession | # Proteins | # Unique Peptides | # Peptides | # PSMs | OKF6/TERT1-Smoke/<br>OKF6/TERT1-Parental<br>(130/126) R1 | OKF6/TERT1-Smoke/<br>OKF6/TERT1-Parental<br>(128/127) R2 | Ratio Standard Errors [%]:<br>OKF6/TERT1-Smoke/<br>OKF6/TERT1-Parental<br>(130/126) R1 | Ratio Standard Errors [%]:<br>OKF6/TERT1-Smoke/<br>OKF6/TERT1-Parental<br>(128/127) R2 | Ratio Variabilities [%]:<br>F13: OKF6/TERT1-<br>Smoke/<br>OKF6/TERT1-Parental<br>(130/126) R1 | Ratio Variabilities [%]:<br>F13: OKF6/TERT1-<br>Smoke/<br>OKF6/TERT1-Parental<br>(128/127) R2 | Ratio Counts: F13:<br>OKF6/TERT1-Smoke/<br>OKF6/TERT1-Parental<br>(130/126) R1 | Ratio Counts: F13:<br>OKF6/TERT1-Smoke/<br>OKF6/TERT1-Parental<br>(128/127) R2 | HPRD ID | Entrez Gene ID | Gene Name                                                                     | Molecular Function                           | Primary Localization                               | Molecular Class                  | Biological Process                                                           | Domains            | Plasma Proteome Database |
|-------------|---------|---------------------------------------------------------------------------------------|-------------------|------------|-------------------|------------|--------|----------------------------------------------------------|----------------------------------------------------------|----------------------------------------------------------------------------------------|----------------------------------------------------------------------------------------|-----------------------------------------------------------------------------------------------|-----------------------------------------------------------------------------------------------|--------------------------------------------------------------------------------|--------------------------------------------------------------------------------|---------|----------------|-------------------------------------------------------------------------------|----------------------------------------------|----------------------------------------------------|----------------------------------|------------------------------------------------------------------------------|--------------------|--------------------------|
| ISG20L2     | 81875   | interferon-stimulated 20 kDa exonuclease-like 2                                       | NP_001290024.1    | 1          | 2                 | 2          | 4      | 1.75                                                     | 1.25                                                     | 6.37                                                                                   | 1.66                                                                                   | 15.8                                                                                          | 2.9                                                                                           | 2                                                                              | 2                                                                              | 7788    | 81875          | None                                                                          | Exonuclease activity                         | Nucleus                                            | Unclassified                     | Regulation of nucleobase, nucleoside, nucleotide and nucleic acid metabolism | EXOIII             | Yes                      |
| GSKP        | 51527   | GSK3-beta interaction protein                                                         | NP_001258833.1    | 1          | 1                 | 1          | 2      | 1.75                                                     |                                                          |                                                                                        |                                                                                        |                                                                                               |                                                                                               | 1                                                                              |                                                                                |         |                |                                                                               |                                              |                                                    |                                  |                                                                              |                    |                          |
| SLC7A11     | 23657   | cystine/glutamate transporter                                                         | NP_055146.1       | 1          | 2                 | 2          | 4      | 1.74                                                     | 1.73                                                     | 0.52                                                                                   | 0.08                                                                                   | 1.6                                                                                           | 0.2                                                                                           | 3                                                                              | 3                                                                              | 9720    | 23657          | solute carrier family 7, (cationic amino acid)transporter, y-system member 11 | Auxiliary transport protein activity         | Plasma membrane                                    | Membrane transport protein       | Transport                                                                    | TM                 | Yes                      |
| EMILIN3     | 90187   | EMILIN-3 precursor                                                                    | NP_443078.1       | 1          | 1                 | 1          | 1      | 1.74                                                     | 0.72                                                     |                                                                                        |                                                                                        |                                                                                               |                                                                                               | 1                                                                              | 1                                                                              | 12335   | 90187          | elastin microfibril interfacer 3                                              | Molecular function unknown                   | -                                                  | Unclassified                     | Biological process unknown                                                   | -                  | Yes                      |
| AP2S1       | 1175    | AP-2 complex subunit sigma isoform 3                                                  | NP_001288005.1    | 5          | 2                 | 2          | 6      | 1.74                                                     | 0.66                                                     |                                                                                        |                                                                                        |                                                                                               |                                                                                               | 1                                                                              | 1                                                                              | 3762    | 1175           | adaptor-related protein complex 2, sigma 1 subunit                            | Receptor signaling complex scaffold activity | Plasma membrane                                    | Adapter molecule                 | Cell communication;Signal transduction                                       | -                  | Yes                      |
| MYL6        | 4637    | myosin light polypeptide 6 isoform 2                                                  | NP_524147.2       | 5          | 1                 | 10         | 72     | 1.74                                                     | 0.57                                                     | 6.58                                                                                   | 23.15                                                                                  | 23.1                                                                                          | 26.7                                                                                          | 4                                                                              | 4                                                                              | 17618   | 4637           | myosin, light polypeptide 6, alkali, smoothmuscle and non-muscle              | Structural constituent of cytoskeleton       | Cytoplasm                                          | Cytoskeletal protein             | Cell growth and/or maintenance                                               | EF                 | Yes                      |
| COX2        | 4513    | cytochrome c oxidase subunit II                                                       | YP_003024029.1    | 1          | 7                 | 7          | 23     | 1.73                                                     | 1.1                                                      | 9.27                                                                                   | 15.8                                                                                   | 47.9                                                                                          | 52.1                                                                                          | 8                                                                              | 8                                                                              |         |                |                                                                               |                                              |                                                    |                                  |                                                                              |                    |                          |
| ZDHHC5      | 25921   | palmitoyltransferase ZDHHC5                                                           | NP_056272.2       | 1          | 2                 | 2          | 3      | 1.73                                                     | 0.97                                                     | 21.56                                                                                  | 8.65                                                                                   | 56.7                                                                                          | 11.9                                                                                          | 2                                                                              | 2                                                                              | 15720   | 25921          | zinc finger, DHHC-type containing 5                                           | Molecular function unknown                   | Integral to membrane                               | Integral membrane protein        | Biological process unknown                                                   | SP;TM              | Yes                      |
| EEF1B2      | 1933    | elongation factor 1-beta                                                              | NP_001950.1       | 1          | 7                 | 8          | 53     | 1.72                                                     | 1.01                                                     | 6.36                                                                                   | 13.27                                                                                  | 63.1                                                                                          | 80.5                                                                                          | 28                                                                             | 28                                                                             | 2804    | 1933           | eukaryotic translation elongation factor beta 2                               | Translation regulator activity               | Cytoplasm                                          | Translation regulatory protein   | Protein metabolism                                                           | -                  | Yes                      |
| DAB2IP      | 153090  | disabled homolog 2-interacting protein isoform 2                                      | NP_619723.1       | 3          | 1                 | 3          | 3      | 1.71                                                     | 1.05                                                     |                                                                                        |                                                                                        |                                                                                               |                                                                                               | 1                                                                              | 1                                                                              | 9903    | 153090         | DAB2 interacting protein                                                      | Molecular function unknown                   | -                                                  | Unclassified                     | Cell communication;Signal transduction                                       | PH;C2;RASGAP;CC    | No                       |
| CHMP4B      | 128866  | charged multivesicular body protein 4b                                                | NP_789782.1       | 2          | 7                 | 7          | 20     | 1.7                                                      | 1.75                                                     | 4.53                                                                                   | 4.73                                                                                   | 23.5                                                                                          | 25.1                                                                                          | 9                                                                              | 9                                                                              | 16642   | 128866         | chromatin modifying protein 4b                                                | Transporter activity                         | Cytoplasm                                          | Transport/cargo protein          | Transport                                                                    | CC                 | No                       |
| SAP130      | 79595   | histone deacetylase complex subunit SAP130 isoform a                                  | NP_001139400.1    | 2          | 1                 | 1          | 2      | 1.7                                                      | 1.11                                                     |                                                                                        |                                                                                        |                                                                                               |                                                                                               | 1                                                                              | 1                                                                              | 18015   | 79595          | None                                                                          | Transcription regulator activity             | Nucleus                                            | Transcription regulatory protein | Regulation of nucleobase, nucleoside, nucleotide and nucleic acid metabolism | -                  | No                       |
| STT3A       | 3703    | dolichyl-diphosphooligosaccharide-protein glycosyltransferase subunit STT3A isoform a | NP_689926.1       | 2          | 9                 | 9          | 65     | 1.7                                                      | 0.65                                                     | 4.99                                                                                   | 8.64                                                                                   | 57.1                                                                                          | 35.9                                                                                          | 39                                                                             | 39                                                                             | 3086    | 3703           | integral membrane protein 1                                                   | Molecular function unknown                   | Plasma membrane                                    | Integral membrane protein        | Biological process unknown                                                   | TM                 | Yes                      |
| SERPIN2     | 5055    | plasminogen activator inhibitor 2                                                     | NP_002566.1       | 1          | 24                | 24         | 239    | 1.69                                                     | 1.73                                                     | 3.43                                                                                   | 3.55                                                                                   | 66.6                                                                                          | 70.7                                                                                          | 109                                                                            | 108                                                                            | 1420    | 5055           | serine (or cysteine) protease inhibitor, clade B (ovalbumin), member 2        | Protease inhibitor activity                  | Cytoplasm                                          | Protease inhibitor               | Protein metabolism;Apoptosis                                                 | SP;SERPIN          | Yes                      |
| CPNE1       | 8904    | copine-1 isoform b                                                                    | NP_003906.2       | 3          | 15                | 15         | 46     | 1.69                                                     | 1.4                                                      | 4.87                                                                                   | 6.01                                                                                   | 42.8                                                                                          | 43                                                                                            | 25                                                                             | 24                                                                             | 5014    | 8904           | copine 1                                                                      | Transporter activity                         | Cytoplasm                                          | Transport/cargo protein          | Vesicle-mediated transport                                                   | C2;VWA             | Yes                      |
| TUBB2A      | 7280    | tubulin beta-2A chain                                                                 | NP_001060.1       | 2          | 6                 | 34         | 523    | 1.69                                                     | 0.52                                                     | 10.96                                                                                  | 46.55                                                                                  | 95.6                                                                                          | 142.3                                                                                         | 19                                                                             | 19                                                                             |         |                |                                                                               |                                              |                                                    |                                  |                                                                              |                    |                          |
| IFB0        | 10437   | gamma-interferon-inducible lysosomal thiol reductase preproprotein                    | NP_006323.2       | 1          | 2                 | 2          | 4      | 1.69                                                     | 0.52                                                     | 5.4                                                                                    | 89.94                                                                                  | 12.9                                                                                          | 73.4                                                                                          | 2                                                                              | 2                                                                              | 5234    | 10437          | interferon, gamma-inducible protein 30                                        | Catalytic activity                           | Lysosome                                           | Enzyme: Reductase                | Metabolism;Energy pathways                                                   | CXXC;SP            | No                       |
| RAB6A       | 5870    | ras-related protein Rab-6A isoform b                                                  | NP_942599.1       | 12         | 1                 | 10         | 81     | 1.68                                                     | 1.33                                                     | 24.25                                                                                  | 2.16                                                                                   | 62.8                                                                                          | 4.1                                                                                           | 2                                                                              | 2                                                                              | 1543    | 5870           | RAB6A, member RAS oncogene family                                             | GTPase activity                              | Golgi apparatus                                    | GTPase                           | Cell communication;Signal transduction                                       | RAB                | No                       |
| OSBP1L2     | 9885    | oxysterol-binding protein-related protein 2 isoform 2                                 | NP_653081.1       | 3          | 1                 | 1          | 4      | 1.67                                                     | 1.86                                                     | 4.3                                                                                    | 5.42                                                                                   | 10.2                                                                                          | 14.3                                                                                          | 2                                                                              | 2                                                                              | 9473    | 9885           | oxysterol binding protein-like 2                                              | Lipid binding                                | Golgi apparatus                                    | Transport/cargo protein          | Vesicle-mediated transport                                                   | CC                 | No                       |
| EREG        | 2069    | proepiregulin preproprotein                                                           | NP_001423.1       | 1          | 1                 | 1          | 2      | 1.66                                                     | 1.6                                                      |                                                                                        |                                                                                        |                                                                                               |                                                                                               | 1                                                                              | 1                                                                              | 3638    | 2069           | epiregulin                                                                    | Growth factor activity                       | Extracellular                                      | Growth factor                    | Cell communication;Signal transduction                                       | TM;EGF;SP          | No                       |
| CPT1A       | 1374    | carntine O-palmitoyltransferase 1, liver isoform isoform 1                            | NP_001867.2       | 2          | 10                | 10         | 21     | 1.66                                                     | 1.6                                                      | 8.1                                                                                    | 6.04                                                                                   | 49.4                                                                                          | 34.5                                                                                          | 12                                                                             | 12                                                                             | 2755    | 1374           | carntine palmitoyltransferase 1A (liver)                                      | Palmitoyltransferase activity                | Mitochondrial membrane                             | Enzyme: Palmitoyltransferase     | Mitochondrial transport                                                      | TM                 | Yes                      |
| ALDH1A2     | 8854    | retinal dehydrogenase 2 isoform 1                                                     | NP_003879.2       | 4          | 3                 | 7          | 31     | 1.66                                                     | 1.33                                                     | 8.46                                                                                   | 0.75                                                                                   | 32.2                                                                                          | 2.2                                                                                           | 5                                                                              | 5                                                                              | 4733    | 8854           | aldehyde dehydrogenase 1 family, member A2                                    | Catalytic activity                           | Extracellular                                      | Enzyme: Dehydrogenase            | Metabolism;Energy pathways                                                   | -                  | Yes                      |
| YBX1        | 4904    | nuclease-sensitive element-binding protein 1                                          | NP_004550.2       | 2          | 8                 | 13         | 101    | 1.66                                                     | 1.2                                                      | 3.82                                                                                   | 8.96                                                                                   | 41                                                                                            | 74.5                                                                                          | 39                                                                             | 38                                                                             | 1095    | 4904           | nuclease sensitive element binding protein 1                                  | Transcription factor activity                | Nucleus                                            | Transcription factor             | Regulation of nucleobase, nucleoside, nucleotide and nucleic acid metabolism | -                  | Yes                      |
| CDC42SE2    | 56990   | CDC42 small effector protein 2                                                        | NP_064625.1       | 1          | 1                 | 1          | 1      | 1.66                                                     | 0.51                                                     |                                                                                        |                                                                                        |                                                                                               |                                                                                               | 1                                                                              | 1                                                                              | 16695   | 56990          | CDC42 small effector 2                                                        | Molecular function unknown                   | Plasma membrane                                    | Unclassified                     | Cell communication;Signal transduction                                       | PBD                | No                       |
| IGSF1       | 3547    | immunoglobulin superfamily member 1 isoform 3 precursor                               | NP_001164432.1    | 3          | 3                 | 3          | 4      | 1.64                                                     | 1.93                                                     | 35.46                                                                                  | 14.66                                                                                  | 97.9                                                                                          | 41.8                                                                                          | 2                                                                              | 2                                                                              | 2138    | 3547           | immunoglobulin superfamily, member 1                                          | Antigen binding                              | Plasma membrane                                    | Immunoglobulin                   | Immune response                                                              | IGC2;TM;IG;SP      | No                       |
| JUND        | 3727    | transcription factor jun-D isoform JunD-FL                                            | NP_005345.3       | 2          | 4                 | 4          | 8      | 1.64                                                     | 1.14                                                     | 2.38                                                                                   | 5.24                                                                                   | 7.8                                                                                           | 12                                                                                            | 4                                                                              | 4                                                                              | 1304    | 3727           | jun D proto-oncogene                                                          | Transcription factor activity                | Nucleus                                            | Transcription factor             | Regulation of nucleobase, nucleoside, nucleotide and nucleic acid metabolism | BRLZ;CC            | Yes                      |
| FBLN5       | 10516   | fibulin-5 precursor                                                                   | NP_006320.2       | 1          | 1                 | 1          | 12     | 1.64                                                     | 0.58                                                     | 10.68                                                                                  | 29.92                                                                                  | 45.1                                                                                          | 44.8                                                                                          | 6                                                                              | 6                                                                              | 5204    | 10516          | fibulin 5                                                                     | Extracellular matrix structural constituent  | Extracellular                                      | Extracellular matrix protein     | Cell growth and/or maintenance                                               | EGFL;EGFCAR;GDS;SP | Yes                      |
| ABCA1       | 19      | ATP-binding cassette sub-family A member 1                                            | NP_005493.2       | 1          | 2                 | 2          | 4      | 1.63                                                     | 1.71                                                     | 14.07                                                                                  | 3.63                                                                                   | 33.4                                                                                          | 8.8                                                                                           | 2                                                                              | 2                                                                              | 2501    | 19             | ATP-binding cassette, sub-family A (ABC1), member 1                           | Transporter activity                         | Plasma membrane;Cell surface;Intracellular vesicle | Transport/cargo protein          | Transport                                                                    | TMAAAS;P           | Yes                      |

Supplementary Table S1. List of quantified proteins in OKF6/TERT1-Smoke cells  
 Raigopaln *et al.*, 2017. Role of protein kinase N2 (PKN2) in cigarette smoke-mediated oncogenic transformation of oral cells

| Gene Symbol  | Gene ID   | Protein Description                                    | Protein Accession | # Proteins | # Unique Peptides | # Peptides | # PSMs | OKF6/TERT1-Smoke/<br>OKF6/TERT1-Parental<br>(130/126) R1 | OKF6/TERT1-Smoke/<br>OKF6/TERT1-Parental<br>(128/127) R2 | Ratio Standard Errors [%]:<br>OKF6/TERT1-Smoke/<br>OKF6/TERT1-Parental<br>(130/126) R1 | Ratio Standard Errors [%]:<br>OKF6/TERT1-Smoke/<br>OKF6/TERT1-Parental<br>(128/127) R2 | Ratio Variabilities [%]:<br>F13: OKF6/TERT1-<br>Smoke/<br>OKF6/TERT1-Parental<br>(130/126) R1 | Ratio Variabilities [%]:<br>F13: OKF6/TERT1-<br>Smoke/<br>OKF6/TERT1-Parental<br>(128/127) R2 | Ratio Counts: F13:<br>OKF6/TERT1-Smoke/<br>OKF6/TERT1-Parental<br>(130/126) R1 | Ratio Counts: F13:<br>OKF6/TERT1-Smoke/<br>OKF6/TERT1-Parental<br>(128/127) R2 | HPRD ID | Entrez Gene Id | Gene Name                                                                                                                                                                            | Molecular Function                           | Primary Localization  | Molecular Class                                 | Biological Process                                                           | Domains              | Plasma Proteome Database |
|--------------|-----------|--------------------------------------------------------|-------------------|------------|-------------------|------------|--------|----------------------------------------------------------|----------------------------------------------------------|----------------------------------------------------------------------------------------|----------------------------------------------------------------------------------------|-----------------------------------------------------------------------------------------------|-----------------------------------------------------------------------------------------------|--------------------------------------------------------------------------------|--------------------------------------------------------------------------------|---------|----------------|--------------------------------------------------------------------------------------------------------------------------------------------------------------------------------------|----------------------------------------------|-----------------------|-------------------------------------------------|------------------------------------------------------------------------------|----------------------|--------------------------|
| CHKA         | 1119      | choline kinase alpha isoform a                         | NP_001268.2       | 2          | 1                 | 1          | 2      | 1.63                                                     | 1.26                                                     |                                                                                        |                                                                                        |                                                                                               |                                                                                               | 1                                                                              | 1                                                                              | 327     | 1119           | choline kinase alpha                                                                                                                                                                 | Lipid kinase activity                        | -                     | Lipid Kinase                                    | Metabolism;Energy pathways                                                   | SP                   | No                       |
| SMYD4        | 114826    | SET and MYND domain-containing protein 4               | NP_443160.2       | 1          | 1                 | 1          | 1      | 1.63                                                     | 0.73                                                     |                                                                                        |                                                                                        |                                                                                               |                                                                                               | 1                                                                              | 1                                                                              | 18079   | 114826         | SET and MYND domain containing 4                                                                                                                                                     | Molecular function unknown                   | -                     | Unclassified                                    | Biological_process unknown                                                   | SET;CC               | No                       |
| BANF1        | 8815      | barrier-to-autointegration factor                      | NP_003851.1       | 1          | 2                 | 2          | 11     | 1.63                                                     | 0.64                                                     | 16.39                                                                                  | 4.81                                                                                   | 65.4                                                                                          | 6.8                                                                                           | 5                                                                              | 5                                                                              | 4817    | 8815           | barrier to autointegration factor 1                                                                                                                                                  | DNA binding                                  | Nucleus               | DNA binding protein                             | Biological_process unknown                                                   | -                    | Yes                      |
| LOC105370098 | 105370098 | uncharacterized protein LOC105370098                   | XP_011506705.1    | 1          | 1                 | 1          | 1      | 1.62                                                     | 1.67                                                     |                                                                                        |                                                                                        |                                                                                               |                                                                                               | 1                                                                              | 1                                                                              |         |                |                                                                                                                                                                                      |                                              |                       |                                                 |                                                                              |                      |                          |
| MMRN2        | 79812     | multimerin-2 precursor                                 | NP_079032.2       | 1          | 1                 | 1          | 2      | 1.62                                                     | 1.51                                                     |                                                                                        |                                                                                        |                                                                                               |                                                                                               | 1                                                                              | 1                                                                              | 10601   | 79812          | multimerin 2                                                                                                                                                                         | Extracellular matrix structural constituent  | Extracellular         | Extracellular matrix protein                    | Cell growth and/or maintenance                                               | SP;CC;C1Q            | Yes                      |
| TNS3         | 64759     | tensin-3                                               | NP_073585.8       | 1          | 1                 | 1          | 1      | 1.62                                                     | 1.24                                                     |                                                                                        |                                                                                        |                                                                                               |                                                                                               | 1                                                                              | 1                                                                              | 8438    | 64759          | tensin 3                                                                                                                                                                             | Receptor activity;Molecular function unknown | Integral to membrane  | Integral membrane protein;Cell surface receptor | Cell communication;Signal transduction;Biological_process unknown            | SH2;PTB              | No                       |
| YBX3         | 8531      | Y-box-binding protein 3 isoform b                      | NP_001138988.1    | 2          | 1                 | 14         | 42     | 1.62                                                     | 1.19                                                     |                                                                                        |                                                                                        |                                                                                               |                                                                                               | 1                                                                              | 1                                                                              |         |                |                                                                                                                                                                                      |                                              |                       |                                                 |                                                                              |                      |                          |
| ACOX3        | 8310      | peroxisomal acyl-coenzyme A oxidase 3 isoform a        | NP_003492.2       | 2          | 4                 | 4          | 4      | 1.62                                                     | 0.85                                                     | 35.45                                                                                  | 25.07                                                                                  | 96.9                                                                                          | 30.9                                                                                          | 2                                                                              | 2                                                                              | 4552    | 8310           | acyl-Coenzyme A oxidase 3, pitavastatin                                                                                                                                              | Catalytic activity                           | Peroxisome            | Enzyme;Oxidase                                  | Metabolism;Energy pathways                                                   | -                    | Yes                      |
| CASC3        | 22794     | protein CASC3                                          | NP_031385.2       | 1          | 1                 | 1          | 1      | 1.61                                                     | 0.74                                                     |                                                                                        |                                                                                        |                                                                                               |                                                                                               | 1                                                                              | 1                                                                              | 16225   | 22794          | cancer susceptibility candidate 3                                                                                                                                                    | Molecular function unknown                   | Cytoplasm             | Unclassified                                    | Regulation of nucleobase, nucleoside, nucleotide and nucleic acid metabolism | -                    | Yes                      |
| TF           | 7018      | serotransferrin precursor                              | NP_001054.1       | 1          | 9                 | 9          | 13     | 1.6                                                      | 1.56                                                     | 4.31                                                                                   | 10.8                                                                                   | 19.7                                                                                          | 50.6                                                                                          | 8                                                                              | 8                                                                              | 1811    | 7018           | transferrin                                                                                                                                                                          | Transporter activity                         | Extracellular         | Transport/cargo protein                         | Transport                                                                    | SP;TR;FER            | Yes                      |
| CLTA         | 1211      | clathrin light chain A isoform a                       | NP_001824.1       | 8          | 7                 | 7          | 19     | 1.6                                                      | 1.4                                                      | 8.24                                                                                   | 5.12                                                                                   | 38.6                                                                                          | 20.5                                                                                          | 8                                                                              | 8                                                                              | 351     | 1211           | clathrin, light polypeptide (Lca)                                                                                                                                                    | Structural molecule activity                 | Cytoplasm             | Structural protein                              | Cell growth and/or maintenance                                               | CC                   | Yes                      |
| KIAA0430     | 9665      | meiosis arrest female protein 1 isoform 2              | NP_001171927.1    | 3          | 1                 | 1          | 1      | 1.6                                                      | 1.07                                                     |                                                                                        |                                                                                        |                                                                                               |                                                                                               | 1                                                                              | 1                                                                              | 13992   | 9665           | None                                                                                                                                                                                 | RNA binding                                  | Nucleus               | RNA binding protein                             | Regulation of nucleobase, nucleoside, nucleotide and nucleic acid metabolism | RRM                  | Yes                      |
| FBXO30       | 84085     | F-box only protein 30                                  | NP_115521.3       | 1          | 1                 | 1          | 4      | 1.6                                                      | 0.84                                                     | 16.7                                                                                   | 7.72                                                                                   | 39.1                                                                                          | 9.2                                                                                           | 2                                                                              | 2                                                                              | 10953   | 84085          | F-box protein 30                                                                                                                                                                     | Ubiquitin-specific protease activity         | Cytoplasm             | Ubiquitin proteasome system protein             | Protein metabolism                                                           | F_BOX;CC             | Yes                      |
| FCGBP        | 8857      | IgGc-binding protein precursor                         | NP_003881.2       | 1          | 1                 | 1          | 8      | 1.6                                                      | 0.72                                                     | 4.48                                                                                   | 5.37                                                                                   | 16.1                                                                                          | 8.6                                                                                           | 5                                                                              | 5                                                                              | 10956   | 8857           | Fc fragment of IgG binding protein [Homosapiens]Oh or A1ases: HGNC:13572. FC(GAMMA)BP Other Designator: Human Fc gammaBP [AA 1-2843]; IgG Fc binding protein; IgG Fc binding protein | Molecular function unknown                   | Extracellular         | Unclassified                                    | Immune response                                                              | SP;VWD               | Yes                      |
| SHPK         | 23729     | sedoheptuloskinase                                     | NP_037408.2       | 1          | 1                 | 1          | 1      | 1.6                                                      | 0.7                                                      |                                                                                        |                                                                                        |                                                                                               |                                                                                               | 1                                                                              | 1                                                                              | 5451    | 23729          | carbohydrate kinase-like                                                                                                                                                             | Molecular function unknown                   | Cytoplasm             | Unclassified                                    | Cell communication;Signal transduction                                       | -                    | Yes                      |
| GCLM         | 2730      | glutamate-cysteine ligase regulatory subunit isoform 1 | NP_002052.1       | 2          | 5                 | 5          | 13     | 1.59                                                     | 1.96                                                     | 2.54                                                                                   | 1.94                                                                                   | 11.5                                                                                          | 10.8                                                                                          | 8                                                                              | 8                                                                              | 3106    | 2730           | glutamate-cysteine ligase, modifier subunit                                                                                                                                          | Ligase activity                              | -                     | Enzyme;Ligase                                   | Metabolism;Energy pathways                                                   | ALDKR                | No                       |
| DDX31        | 64794     | probable ATP-dependent RNA helicase DDX31 isoform 1    | NP_073616.6       | 2          | 3                 | 3          | 3      | 1.59                                                     | 1.89                                                     | 3.43                                                                                   | 15.42                                                                                  | 7.7                                                                                           | 43.1                                                                                          | 2                                                                              | 2                                                                              | 10860   | 64794          | DEAD (Asp-Glu-Ala-Asp) box polypeptide 31                                                                                                                                            | RNA binding                                  | Nucleolus             | RNA binding protein;RNA helicase                | Regulation of nucleobase, nucleoside, nucleotide and nucleic acid metabolism | DEXDc;HELIC          | No                       |
| HYOU1        | 10525     | hypoxia up-regulated protein 1 precursor               | NP_006380.1       | 2          | 43                | 43         | 221    | 1.59                                                     | 1.87                                                     | 3.39                                                                                   | 3.68                                                                                   | 63.2                                                                                          | 85.3                                                                                          | 115                                                                            | 116                                                                            | 3448    | 10525          | hypoxia up-regulated 1                                                                                                                                                               | Chaperone activity                           | Endoplasmic reticulum | Chaperone                                       | Protein metabolism                                                           | SP                   | Yes                      |
| FBNP4        | 23360     | formin-binding protein 4                               | NP_056123.2       | 1          | 4                 | 4          | 6      | 1.59                                                     | 1.67                                                     | 10.01                                                                                  | 7.56                                                                                   | 32.6                                                                                          | 25.6                                                                                          | 4                                                                              | 4                                                                              | 10996   | 23360          | formin binding protein 4                                                                                                                                                             | Molecular function unknown                   | Nucleus               | Unclassified                                    | Biological_process unknown                                                   | WW;CC                | No                       |
| PVR          | 5817      | poliovirus receptor isoform alpha precursor            | NP_006496.4       | 4          | 2                 | 2          | 6      | 1.59                                                     | 1.5                                                      | 4.15                                                                                   | 3.67                                                                                   | 13.3                                                                                          | 11.1                                                                                          | 4                                                                              | 4                                                                              | 1434    | 5817           | poliovirus receptor                                                                                                                                                                  | Receptor activity                            | Plasma membrane       | Cell surface receptor                           | Cell communication;Signal transduction                                       | SP;IGV;IG_TM;Ig_LIKE | Yes                      |
| PPHLN1       | 51535     | periplin-1 isoform 1                                   | NP_057572.5       | 4          | 1                 | 1          | 2      | 1.59                                                     | 0.75                                                     |                                                                                        |                                                                                        |                                                                                               |                                                                                               | 1                                                                              | 1                                                                              | 10488   | 51535          | periplin 1                                                                                                                                                                           | Structural molecule activity                 | Nucleus;Cytoplasm     | Structural protein                              | Cell growth and/or maintenance                                               | NES;NLS              | Yes                      |
| CYP27B1      | 1594      | 25-hydroxyvitamin D-1 alpha hydroxylase, mitochondrial | NP_000776.1       | 1          | 2                 | 2          | 3      | 1.58                                                     | 1.94                                                     |                                                                                        |                                                                                        |                                                                                               |                                                                                               | 1                                                                              | 1                                                                              | 2031    | 1594           | cytochrome P450, family 27, subfamily B, polypeptide 1                                                                                                                               | Catalytic activity                           | Mitochondrion         | Enzyme;Hydroxylase                              | Metabolism;Energy pathways                                                   | -                    | Yes                      |
| PGAM4        | 441531    | phosphoglycerate mutase 4                              | NP_001025062.1    | 1          | 1                 | 8          | 57     | 1.58                                                     | 1.7                                                      |                                                                                        |                                                                                        |                                                                                               |                                                                                               | 1                                                                              | 1                                                                              | 18831   | 441531         | Phosphoglycerate mutase family 4                                                                                                                                                     | Isomerase activity                           | -                     | Enzyme;Mutase                                   | Metabolism                                                                   | -                    | No                       |
| NAMPT        | 10135     | nicotinamide phosphoribosyltransferase precursor       | NP_005737.1       | 1          | 15                | 15         | 60     | 1.58                                                     | 1.49                                                     | 3.43                                                                                   | 3.59                                                                                   | 31.4                                                                                          | 31                                                                                            | 32                                                                             | 32                                                                             | 9938    | 10135          | pre-B-cell colony enhancing factor 1                                                                                                                                                 | Transferase activity                         | Extracellular         | Cytokine                                        | Anti-apoptosis                                                               | -                    | Yes                      |
| COPS8        | 10920     | COP9 signalosome complex subunit 8 isoform 1           | NP_006701.1       | 2          | 2                 | 2          | 22     | 1.58                                                     | 0.91                                                     | 8.37                                                                                   | 8.89                                                                                   | 43.8                                                                                          | 26                                                                                            | 10                                                                             | 10                                                                             | 16737   | 10920          | COP9 constitutive photomorphogenic homolog subunit 8 (Arabidopsis)                                                                                                                   | Molecular function unknown                   | Cytoplasm             | Regulatory/other subunit                        | Regulation of signal transduction                                            | -                    | Yes                      |
| THEMIS       | 387357    | protein THEMIS isoform 1                               | NP_001158157.1    | 3          | 1                 | 1          | 1      | 1.58                                                     | 0.59                                                     |                                                                                        |                                                                                        |                                                                                               |                                                                                               | 1                                                                              | 1                                                                              | 16662   | 387357         | chromosome 6 open reading frame 190                                                                                                                                                  | Molecular function unknown                   | -                     | Unclassified                                    | Biological_process unknown                                                   | -                    | No                       |
| FBN1         | 2200      | fibrillin-1 precursor                                  | NP_000129.3       | 2          | 2                 | 2          | 5      | 1.57                                                     | 0.69                                                     | 9.85                                                                                   | 18.09                                                                                  | 27.3                                                                                          | 21.8                                                                                          | 3                                                                              | 3                                                                              | 618     | 2200           | fibrillin 1 (Marfan syndrome)                                                                                                                                                        | Extracellular matrix structural constituent  | Extracellular         | Extracellular matrix protein                    | Cell growth and/or maintenance                                               | EGF;EGFCA;EG_FL;SP   | Yes                      |

Supplementary Table S1. List of quantified proteins in OKF6/TERT1-Smoke cells  
 Raingopaln *et al.*, 2017. Role of protein kinase N2 (PKN2) in cigarette smoke-mediated oncogenic transformation of oral cells

| Gene Symbol | Gene ID | Protein Description                                                     | Protein Accession | # Proteins | # Unique Peptides | # Peptides | # PSMs | OKF6/TERT1-Smoke/<br>OKF6/TERT1-Parental<br>(130/126) R1 | OKF6/TERT1-Smoke/<br>OKF6/TERT1-Parental<br>(128/127) R2 | Ratio Standard Errors [%]:<br>OKF6/TERT1-Smoke/<br>OKF6/TERT1-Parental<br>(130/126) R1 | Ratio Standard Errors [%]:<br>OKF6/TERT1-Smoke/<br>OKF6/TERT1-Parental<br>(128/127) R2 | Ratio Variabilities [%]:<br>F13: OKF6/TERT1-<br>Smoke/<br>OKF6/TERT1-Parental<br>(130/126) R1 | Ratio Variabilities [%]:<br>F13: OKF6/TERT1-<br>Smoke/<br>OKF6/TERT1-Parental<br>(128/127) R2 | Ratio Counts: F13:<br>OKF6/TERT1-Smoke/<br>OKF6/TERT1-Parental<br>(130/126) R1 | Ratio Counts: F13:<br>OKF6/TERT1-Smoke/<br>OKF6/TERT1-Parental<br>(128/127) R2 | HPRD ID | Entrez Gene Id | Gene Name                                                                  | Molecular Function                           | Primary Localization   | Molecular Class                | Biological Process                                                                                                  | Domains                          | Plasma Proteome Database |
|-------------|---------|-------------------------------------------------------------------------|-------------------|------------|-------------------|------------|--------|----------------------------------------------------------|----------------------------------------------------------|----------------------------------------------------------------------------------------|----------------------------------------------------------------------------------------|-----------------------------------------------------------------------------------------------|-----------------------------------------------------------------------------------------------|--------------------------------------------------------------------------------|--------------------------------------------------------------------------------|---------|----------------|----------------------------------------------------------------------------|----------------------------------------------|------------------------|--------------------------------|---------------------------------------------------------------------------------------------------------------------|----------------------------------|--------------------------|
| HRC         | 3270    | sarcoplasmic reticulum histidine-rich calcium-binding protein precursor | NP_002143.1       | 1          | 1                 | 1          | 1      | 1.57                                                     | 0.6                                                      |                                                                                        |                                                                                        |                                                                                               |                                                                                               | 1                                                                              | 1                                                                              | 818     | 3270           | histidine rich calcium binding protein                                     | Calcium ion binding                          | Sarcoplasmic reticulum | Calcium binding protein        | Cell communication;Signal transduction                                                                              | SP;CC                            | Yes                      |
| PPOX        | 5498    | protoporphyrinogen oxidase                                              | NP_000300.1       | 1          | 1                 | 1          | 3      | 1.57                                                     | 0.59                                                     |                                                                                        | 13.95                                                                                  |                                                                                               | 11.6                                                                                          | 1                                                                              | 2                                                                              | 2953    | 5498           | protoporphyrinogen oxidase                                                 | Catalytic activity                           | Mitochondrion          | Enzyme: Oxidase                | Metabolism;Energy pathways                                                                                          | SP                               | Yes                      |
| G6PD        | 2539    | glucose-6-phosphate 1-dehydrogenase isoform a                           | NP_000393.4       | 2          | 33                | 33         | 123    | 1.56                                                     | 1.74                                                     | 3.61                                                                                   | 3.26                                                                                   | 48.8                                                                                          | 49                                                                                            | 67                                                                             | 67                                                                             | 2377    | 2539           | glucose-6-phosphate dehydrogenase                                          | Catalytic activity                           | Cytoplasm              | Enzyme: Dehydrogenase          | Metabolism;Energy pathways                                                                                          | -                                | Yes                      |
| OPN4        | 94233   | melanopsin isoform 2                                                    | NP_001025186.1    | 2          | 1                 | 1          | 1      | 1.56                                                     | 1.54                                                     |                                                                                        |                                                                                        |                                                                                               |                                                                                               | 1                                                                              | 1                                                                              | 5977    | 94233          | opsin 4 (melanopsin)                                                       | G-protein coupled receptor activity          | Plasma membrane        | G protein coupled receptor     | Cell communication;Signal transduction                                                                              | TM                               | Yes                      |
| DCK         | 1633    | deoxycytidine kinase                                                    | NP_000779.1       | 1          | 1                 | 1          | 2      | 1.56                                                     | 1.39                                                     |                                                                                        |                                                                                        |                                                                                               |                                                                                               | 1                                                                              | 1                                                                              | 507     | 1633           | deoxycytidine kinase                                                       | Catalytic activity                           | Cytoplasm              | Enzyme: Phosphotransferase     | Regulation of nucleobase, nucleoside, nucleotide and nucleic acid metabolism                                        | NLS                              | Yes                      |
| MAGED2      | 10916   | melanoma-associated antigen D2                                          | NP_803182.1       | 9          | 13                | 13         | 34     | 1.56                                                     | 1.23                                                     | 2.63                                                                                   | 8.6                                                                                    | 16                                                                                            | 42.9                                                                                          | 15                                                                             | 15                                                                             | 6630    | 10916          | melanoma antigen family D, 2                                               | Molecular function unknown                   | Nucleus                | Unclassified                   | Cell growth and/or maintenance                                                                                      | MAGE                             | Yes                      |
| NHSL1       | 57224   | NHS-like protein 1 isoform 1                                            | NP_065197.1       | 2          | 2                 | 2          | 5      | 1.56                                                     | 1.09                                                     | 4.07                                                                                   | 17.84                                                                                  | 11.1                                                                                          | 34.6                                                                                          | 3                                                                              | 3                                                                              | 19619   | 57224          | NHS-like 1                                                                 | Molecular function unknown                   | -                      | Unclassified                   | Biological processes unknown                                                                                        | CC                               | No                       |
| LYN         | 4067    | tyrosine-protein kinase Lyn isoform A                                   | NP_002341.1       | 52         | 5                 | 7          | 28     | 1.56                                                     | 0.98                                                     | 8.32                                                                                   | 12.68                                                                                  | 32.7                                                                                          | 31.1                                                                                          | 6                                                                              | 6                                                                              | 1301    | 4067           | v-yes-1 Yamaguchi sarcoma viral related oncogene homolog                   | Protein tyrosine kinase activity             | Plasma membrane        | Tyrosine kinase                | Cell communication;Signal transduction                                                                              | SH3;SH2;Tyr_Kinase               | Yes                      |
| C17orf64    | 124773  | uncharacterized protein C17orf64                                        | NP_859058.2       | 1          | 1                 | 1          | 1      | 1.56                                                     | 0.77                                                     |                                                                                        |                                                                                        |                                                                                               |                                                                                               | 1                                                                              | 1                                                                              | 14029   | 124773         | None                                                                       | Molecular function unknown                   | -                      | Unclassified                   | Biological processes unknown                                                                                        | -                                | No                       |
| FN1         | 2335    | fibronectin isoform 3 preproprotein                                     | NP_002017.1       | 10         | 33                | 33         | 96     | 1.55                                                     | 1.76                                                     | 4.22                                                                                   | 4.26                                                                                   | 48.5                                                                                          | 56.4                                                                                          | 49                                                                             | 49                                                                             | 626     | 2335           | fibronectin 1                                                              | Extracellular matrix structural constituent  | Extracellular;Nucleus  | Extracellular matrix protein   | Cell growth and/or maintenance                                                                                      | FN1;FN2;FN3;RGD;SP               | Yes                      |
| HSP90B1     | 7184    | endoplasmic precursor                                                   | NP_003290.1       | 1          | 40                | 42         | 356    | 1.55                                                     | 1.49                                                     | 1.95                                                                                   | 2.85                                                                                   | 42.2                                                                                          | 61.9                                                                                          | 180                                                                            | 180                                                                            | 1860    | 7184           | tumor rejection antigen (gp96) 1                                           | Heat shock protein activity                  | Endoplasmic reticulum  | Heat shock protein             | Protein metabolism                                                                                                  | SP;CC                            | Yes                      |
| DOLK        | 22845   | dolichol kinase                                                         | NP_055723.1       | 1          | 1                 | 1          | 1      | 1.55                                                     | 1.35                                                     |                                                                                        |                                                                                        |                                                                                               |                                                                                               | 1                                                                              | 1                                                                              | 15525   | 22845          | transmembrane protein 15                                                   | Molecular function unknown                   | Integral to membrane   | Integral membrane protein      | Biological processes unknown                                                                                        | TM                               | Yes                      |
| MARCKSL1    | 65108   | MARCKS-related protein                                                  | NP_075385.1       | 1          | 4                 | 5          | 23     | 1.55                                                     | 1.33                                                     | 5.78                                                                                   | 3.32                                                                                   | 25.8                                                                                          | 12.5                                                                                          | 8                                                                              | 8                                                                              | 4247    | 65108          | MARCKS-like 1                                                              | Receptor signaling complex scaffold activity | -                      | Adapter molecule               | Cell communication;Signal transduction                                                                              | -                                | Yes                      |
| EEF1A2      | 1917    | elongation factor 1-alpha 2                                             | NP_001949.1       | 1          | 2                 | 13         | 131    | 1.55                                                     | 1.14                                                     | 20.85                                                                                  | 8.04                                                                                   | 48.1                                                                                          | 13                                                                                            | 2                                                                              | 2                                                                              | 4265    | 1917           | eukaryotic translation elongation factor 1alpha 2                          | Translation regulator activity               | Cytoplasm              | Translation regulatory protein | Protein metabolism                                                                                                  | GTP_EFTU;GTP_EFTU_D2;GTP_EFTU_D3 | Yes                      |
| PRPH        | 5630    | peripherin                                                              | NP_006253.2       | 2          | 1                 | 5          | 26     | 1.55                                                     | 1.02                                                     | 26.85                                                                                  | 13.48                                                                                  | 64.6                                                                                          | 19.7                                                                                          | 2                                                                              | 2                                                                              | 1365    | 5630           | peripherin                                                                 | Structural constituent of cytoskeleton       | Cytoplasm              | Cytoskeletal protein           | Cell growth and/or maintenance                                                                                      | CC                               | Yes                      |
| CCDC59      | 29080   | thyroid transcription factor 1-associated protein 26                    | NP_054886.2       | 1          | 1                 | 1          | 2      | 1.55                                                     | 0.78                                                     |                                                                                        |                                                                                        |                                                                                               |                                                                                               | 1                                                                              | 1                                                                              | 13696   | 29080          | None                                                                       | Molecular function unknown                   | -                      | Unclassified                   | Biological processes unknown                                                                                        | CC                               | No                       |
| TGFB2       | 7042    | transforming growth factor beta-2 isoform 1 precursor                   | NP_001129071.1    | 2          | 2                 | 2          | 5      | 1.54                                                     | 1.46                                                     | 11.3                                                                                   | 23.77                                                                                  | 25                                                                                            | 52.3                                                                                          | 2                                                                              | 2                                                                              | 1828    | 7042           | transforming growth factor, beta 2                                         | Growth factor activity                       | Extracellular          | Growth factor                  | Cell communication;Signal transduction                                                                              | TGFB;SP;TM                       | No                       |
| CLNS1A      | 1207    | methylseleno subunit pCln                                               | NP_001284.1       | 1          | 6                 | 6          | 47     | 1.54                                                     | 1.33                                                     | 4.73                                                                                   | 4.19                                                                                   | 37                                                                                            | 27.7                                                                                          | 24                                                                             | 24                                                                             | 3694    | 1207           | chloride channel, nucleotide-sensitive, 1A                                 | Transporter activity                         | Plasma membrane        | Transport/cargo protein        | Transport                                                                                                           | TM                               | Yes                      |
| CPSF3L      | 54973   | integrator complex subunit 11 isoform 2                                 | NP_060341.2       | 5          | 3                 | 3          | 3      | 1.54                                                     | 1.21                                                     | 17.46                                                                                  | 14.43                                                                                  | 39.6                                                                                          | 25                                                                                            | 2                                                                              | 2                                                                              | 13377   | 54973          | cleavage and polyadenylation specific factor3-like                         | Endonuclease activity                        | Nucleus                | Enzyme: Hydrolase              | Regulation of cell cycle                                                                                            | -                                | Yes                      |
| SCYL1       | 57410   | N-terminal kinase-like protein isoform A                                | NP_065731.3       | 2          | 6                 | 6          | 10     | 1.54                                                     | 1.18                                                     | 2.97                                                                                   | 5.1                                                                                    | 10.2                                                                                          | 13.5                                                                                          | 5                                                                              | 5                                                                              | 6414    | 57410          | SCYL1-like 1 (S. cerevisiae)                                               | Transcription regulator activity             | Centrosome             | Cell cycle control protein     | Cell communication;Signal transduction;Regulation of nucleobase, nucleoside, nucleotide and nucleic acid metabolism | HEAT-S_T_Y_Kinase                | No                       |
| OXA1L       | 5018    | mitochondrial inner membrane protein OXA1L                              | NP_005006.3       | 1          | 4                 | 4          | 7      | 1.54                                                     | 1                                                        | 6.22                                                                                   | 13.43                                                                                  | 19.3                                                                                          | 27.3                                                                                          | 4                                                                              | 4                                                                              | 3043    | 5018           | oxidase (cytochrome c) assembly 1-like                                     | Catalytic activity                           | Mitochondrion          | Enzyme: Oxidase                | Metabolism;Energy pathways                                                                                          | TM                               | Yes                      |
| DDX39A      | 10212   | ATP-dependent RNA helicase DDX39A                                       | NP_005795.2       | 1          | 8                 | 17         | 58     | 1.54                                                     | 0.85                                                     | 4.93                                                                                   | 8.54                                                                                   | 23.1                                                                                          | 21.9                                                                                          | 9                                                                              | 9                                                                              |         |                |                                                                            |                                              |                        |                                |                                                                                                                     |                                  |                          |
| PCID2       | 55795   | PCI domain-containing protein 2 isoform 2                               | NP_001245141.1    | 3          | 4                 | 4          | 7      | 1.54                                                     | 0.82                                                     | 5.75                                                                                   | 6.81                                                                                   | 20                                                                                            | 12.6                                                                                          | 5                                                                              | 5                                                                              | 7749    | 55795          | None                                                                       | Molecular function unknown                   | -                      | Unclassified                   | Biological processes unknown                                                                                        | PCI                              | No                       |
| VPS33A      | 65082   | vacuolar protein sorting-associated protein 33A                         | NP_075067.2       | 1          | 1                 | 1          | 1      | 1.54                                                     | 0.6                                                      |                                                                                        |                                                                                        |                                                                                               |                                                                                               | 1                                                                              | 1                                                                              | 15651   | 65082          | vacuolar protein sorting 33A (yeast)                                       | Transporter activity                         | Golgi apparatus        | Transport/cargo protein        | Transport                                                                                                           | -                                | Yes                      |
| CKB         | 1152    | creatine kinase B-type                                                  | NP_001814.2       | 1          | 9                 | 10         | 34     | 1.53                                                     | 1.61                                                     | 6.93                                                                                   | 8.86                                                                                   | 45.8                                                                                          | 64.2                                                                                          | 17                                                                             | 17                                                                             | 423     | 1152           | creatine kinase, brain                                                     | Catalytic activity                           | Cytoplasm              | Enzyme: Phosphotransferase     | Metabolism;Energy pathways                                                                                          | -                                | Yes                      |
| TGOLN2      | 10618   | trans-Golgi network integral membrane protein 2 isoform 2 precursor     | NP_001193769.1    | 4          | 1                 | 1          | 2      | 1.53                                                     | 1.52                                                     |                                                                                        |                                                                                        |                                                                                               |                                                                                               | 1                                                                              | 1                                                                              | 4343    | 10618          | trans-golgi network protein 2                                              | Auxiliary transport protein activity         | Golgi apparatus        | Membrane transport protein     | Transport                                                                                                           | SP;TM                            | Yes                      |
| DFFB        | 1677    | DNA fragmentation factor subunit beta isoform 1                         | NP_001269598.1    | 2          | 1                 | 1          | 2      | 1.53                                                     | 1.35                                                     |                                                                                        |                                                                                        |                                                                                               |                                                                                               | 1                                                                              | 1                                                                              | 3532    | 1677           | DNA fragmentation factor, 40kDa, betapolypeptide (caspase-activated DNase) | Deoxyribonuclease activity                   | Nucleus                | Deoxyribonuclease              | Regulation of nucleobase, nucleoside, nucleotide and nucleic acid metabolism                                        | -                                | Yes                      |
| GYS1        | 2997    | glycogen [starch] synthase, muscle isoform 1                            | NP_002094.2       | 3          | 14                | 14         | 33     | 1.53                                                     | 1.18                                                     | 4.43                                                                                   | 8.39                                                                                   | 28.4                                                                                          | 42.5                                                                                          | 17                                                                             | 17                                                                             | 721     | 2997           | glycogen synthase 1 (muscle)                                               | Ligase activity                              | Cytoplasm              | Enzyme: Ligase                 | Metabolism;Energy pathways                                                                                          | -                                | Yes                      |

Supplementary Table S1. List of quantified proteins in OKF6/TERT1-Smoke cells  
 Rainngnanan *et al.*, 2017. Role of protein kinase N2 (PKN2) in cigarette smoke-mediated oncogenic transformation of oral cells

| Gene Symbol | Gene ID | Protein Description                                            | Protein Accession | # Proteins | # Unique Peptides | # Peptides | # PSMs | OKF6/TERT1-Smoke/<br>OKF6/TERT1-Parental<br>(130/126) R1 | OKF6/TERT1-Smoke/<br>OKF6/TERT1-Parental<br>(128/127) R2 | Ratio Standard Errors [%]:<br>OKF6/TERT1-Smoke/<br>OKF6/TERT1-Parental<br>(130/126) R1 | Ratio Standard Errors [%]:<br>OKF6/TERT1-Smoke/<br>OKF6/TERT1-Parental<br>(128/127) R2 | Ratio Variabilities [%]:<br>F13: OKF6/TERT1-<br>Smoke/<br>OKF6/TERT1-Parental<br>(130/126) R1 | Ratio Variabilities [%]:<br>F13: OKF6/TERT1-<br>Smoke/<br>OKF6/TERT1-Parental<br>(128/127) R2 | Ratio Counts: F13:<br>OKF6/TERT1-Smoke/<br>OKF6/TERT1-Parental<br>(130/126) R1 | Ratio Counts: F13:<br>OKF6/TERT1-Smoke/<br>OKF6/TERT1-Parental<br>(128/127) R2 | HPRD ID | Entrez Gene ID | Gene Name                                                                                                                             | Molecular Function                                       | Primary Localization  | Molecular Class                                          | Biological Process                                                           | Domains          | Plasma Proteome Database |
|-------------|---------|----------------------------------------------------------------|-------------------|------------|-------------------|------------|--------|----------------------------------------------------------|----------------------------------------------------------|----------------------------------------------------------------------------------------|----------------------------------------------------------------------------------------|-----------------------------------------------------------------------------------------------|-----------------------------------------------------------------------------------------------|--------------------------------------------------------------------------------|--------------------------------------------------------------------------------|---------|----------------|---------------------------------------------------------------------------------------------------------------------------------------|----------------------------------------------------------|-----------------------|----------------------------------------------------------|------------------------------------------------------------------------------|------------------|--------------------------|
| RBM15B      | 29890   | putative RNA-binding protein 15B                               | NP_037418.3       | 1          | 2                 | 3          | 4      | 1.53                                                     | 0.99                                                     | 15                                                                                     | 4.64                                                                                   | 33.4                                                                                          | 6.5                                                                                           | 2                                                                              | 2                                                                              | 11486   | 29890          | RNA binding motif protein 15B                                                                                                         | RNA binding                                              | Nucleus               | RNA binding protein                                      | Regulation of nucleobase, nucleoside, nucleotide and nucleic acid metabolism | RRM              | No                       |
| ASF1A       | 25842   | histone chaperone ASF1A                                        | NP_054753.1       | 1          | 1                 | 1          | 2      | 1.53                                                     | 0.98                                                     |                                                                                        |                                                                                        |                                                                                               |                                                                                               | 1                                                                              | 1                                                                              | 16459   | 25842          | ASF1 anti-silencing function 1 homolog A (S.cerevisiae)                                                                               | Chaperone activity                                       | Nucleus               | Chaperone                                                | Protein metabolism                                                           | -                | No                       |
| RWDD1       | 51389   | RWD domain-containing protein 1 isoform a                      | NP_057036.2       | 2          | 3                 | 3          | 4      | 1.53                                                     | 0.92                                                     | 4.07                                                                                   | 10.08                                                                                  | 12.5                                                                                          | 18.6                                                                                          | 4                                                                              | 4                                                                              | 15286   | 51389          | RWD domain containing 1                                                                                                               | Molecular function unknown                               | -                     | Unclassified                                             | Biological processes                                                         | RWD,CC           | Yes                      |
| IFT122      | 55764   | intraflagellar transport protein 122 homolog isoform 1         | NP_443711.2       | 2          | 1                 | 1          | 2      | 1.53                                                     | 0.74                                                     |                                                                                        |                                                                                        |                                                                                               |                                                                                               | 1                                                                              | 1                                                                              | 6922    | 55764          | WD repeat domain 10                                                                                                                   | Molecular function unknown                               | Cytoplasm             | Unclassified                                             | Biological processes                                                         | WD40             | Yes                      |
| NQO1        | 1728    | NAD(P)H dehydrogenase [quinone] 1 isoform a                    | NP_000894.1       | 4          | 11                | 11         | 47     | 1.52                                                     | 1.85                                                     | 5.73                                                                                   | 5.6                                                                                    | 46.7                                                                                          | 56.8                                                                                          | 26                                                                             | 26                                                                             | 518     | 1728           | NAD(P)H dehydrogenase, quinone 1                                                                                                      | Oxidoreductase activity                                  | Mitochondrion         | Enzyme: Oxidoreductase                                   | Metabolism;Energy pathways;Synaptic transmission;Xenobiotic metabolism       | -                | Yes                      |
| PROSER2     | 254427  | proline and serine-rich protein 2                              | NP_694988.3       | 1          | 6                 | 6          | 9      | 1.52                                                     | 1.47                                                     | 12.42                                                                                  | 7.91                                                                                   | 44                                                                                            | 26.4                                                                                          | 5                                                                              | 5                                                                              |         |                |                                                                                                                                       |                                                          |                       |                                                          |                                                                              |                  |                          |
| TOX4        | 9878    | TOX high mobility group box family member 4 isoform 1          | NP_055643.1       | 5          | 4                 | 4          | 7      | 1.52                                                     | 1.25                                                     | 2.59                                                                                   | 9.89                                                                                   | 7.9                                                                                           | 25.2                                                                                          | 4                                                                              | 4                                                                              | 12661   | 9878           | chromosome 14 open reading frame 92                                                                                                   | DNA binding                                              | Nucleus               | DNA binding protein                                      | Regulation of nucleobase, nucleoside, nucleotide and nucleic acid metabolism | HMG              | Yes                      |
| KMT2A       | 4297    | histone-lysine N-methyltransferase 2A isoform 1 precursor      | NP_001184033.1    | 2          | 2                 | 2          | 3      | 1.52                                                     | 0.83                                                     |                                                                                        |                                                                                        |                                                                                               |                                                                                               | 1                                                                              | 1                                                                              |         |                |                                                                                                                                       |                                                          |                       |                                                          |                                                                              |                  |                          |
| HNRNPCL3    | 649330  | heterogeneous nuclear ribonucleoprotein C-like 3               | NP_001139653.1    | 3          | 1                 | 9          | 183    | 1.52                                                     | 0.53                                                     | 4.71                                                                                   | 37.12                                                                                  | 10.1                                                                                          | 28.6                                                                                          | 2                                                                              | 2                                                                              |         |                |                                                                                                                                       |                                                          |                       |                                                          |                                                                              |                  |                          |
| AHCY        | 191     | adenosylhomocysteinase isoform 1                               | NP_000678.1       | 2          | 20                | 22         | 92     | 1.51                                                     | 1.41                                                     | 3.57                                                                                   | 4.28                                                                                   | 38.2                                                                                          | 43.3                                                                                          | 47                                                                             | 47                                                                             | 1621    | 191            | S-adenosylhomocysteinase hydrolase                                                                                                    | Hydrolase activity                                       | Cytoplasm             | Enzyme: Hydrolase                                        | Metabolism;Energy pathways                                                   | -                | Yes                      |
| STK11       | 6794    | serine/threonine-protein kinase STK11                          | NP_000446.1       | 1          | 2                 | 2          | 4      | 1.51                                                     | 1.31                                                     | 41.05                                                                                  | 29.87                                                                                  | 107.5                                                                                         | 59.6                                                                                          | 2                                                                              | 2                                                                              | 3740    | 6794           | serine/threonine kinase 11 (Peutz-Jeghers syndrome)                                                                                   | Protein serine/threonine kinase activity                 | Cytoplasm             | Serine/threonine kinase                                  | Cell communication;Signal transduction                                       | S_T_kinase       | Yes                      |
| AFTPH       | 54812   | afiphalin isoform a                                            | NP_982261.2       | 3          | 3                 | 3          | 3      | 1.51                                                     | 1.12                                                     | 0.17                                                                                   | 5.56                                                                                   | 0.5                                                                                           | 10.8                                                                                          | 3                                                                              | 3                                                                              | 10635   | 54812          | None                                                                                                                                  | Molecular function unknown                               | Cytoplasm             | Unclassified                                             | Biological processes unknown                                                 | -                | Yes                      |
| FKBP11      | 51303   | peptidyl-prolyl cis-trans isomerase FKBP11 isoform 1 precursor | NP_057678.1       | 2          | 1                 | 1          | 4      | 1.51                                                     | 1.08                                                     | 5.43                                                                                   | 3.9                                                                                    | 14.3                                                                                          | 7.3                                                                                           | 3                                                                              | 3                                                                              | 11170   | 51303          | FK506 binding protein 11, 19 kDa                                                                                                      | Isomerase activity                                       | Integral to membrane  | Enzyme: Isomerase                                        | Metabolism;Energy pathways                                                   | SP,TM            | Yes                      |
| RBBP6       | 5930    | E3 ubiquitin-protein ligase RBBP6 isoform 1                    | NP_008841.2       | 3          | 2                 | 2          | 2      | 1.51                                                     | 0.75                                                     |                                                                                        |                                                                                        |                                                                                               |                                                                                               | 1                                                                              | 1                                                                              | 2964    | 5930           | retinoblastoma binding protein 6                                                                                                      | Ubiquitin-specific protease activity                     | Nucleus;Cytoplasm     | Ubiquitin proteasome system protease                     | Protein metabolism                                                           | ZnF_C2HC;RING;CC | No                       |
| EIF5        | 1983    | eukaryotic translation initiation factor 5                     | NP_001960.2       | 1          | 12                | 12         | 40     | 1.5                                                      | 1.66                                                     | 4.76                                                                                   | 4.37                                                                                   | 34.4                                                                                          | 35.2                                                                                          | 22                                                                             | 22                                                                             | 3417    | 1983           | eukaryotic translation initiation factor 5                                                                                            | Translation regulator activity;GTPase activator activity | Cytoplasm             | Translation regulatory protein;GTPase activating protein | Protein metabolism                                                           | -                | Yes                      |
| P4HB        | 5034    | protein disulfide-isomerase precursor                          | NP_000909.2       | 1          | 36                | 36         | 244    | 1.5                                                      | 1.6                                                      | 1.77                                                                                   | 2.09                                                                                   | 30.8                                                                                          | 38.8                                                                                          | 127                                                                            | 126                                                                            | 7181    | 5034           | procollagen-proline, 2-oxoglutarate-4-dioxygenase (proline 4-hydroxylase), beta polypeptide (protein disulfideisomerase associated 1) | Isomerase activity                                       | Endoplasmic reticulum | Enzyme: Isomerase                                        | Protein metabolism                                                           | SP               | Yes                      |
| RDH13       | 112724  | retinol dehydrogenase 13 isoform 1 precursor                   | NP_001139443.1    | 2          | 5                 | 5          | 16     | 1.5                                                      | 1.52                                                     | 8.68                                                                                   | 8.53                                                                                   | 38.2                                                                                          | 37.8                                                                                          | 8                                                                              | 8                                                                              | 17963   | 112724         | retinol dehydrogenase 13 (all-trans and 9-cis)                                                                                        | Oxidoreductase activity                                  | -                     | Enzyme: Oxidoreductase                                   | Metabolism;Energy pathways                                                   | -                | Yes                      |
| C17orf85    | 55421   | uncharacterized protein C17orf85                               | NP_001107590.1    | 1          | 3                 | 3          | 6      | 1.5                                                      | 1.14                                                     | 12.95                                                                                  | 5.04                                                                                   | 34.6                                                                                          | 10                                                                                            | 3                                                                              | 3                                                                              | 17116   | 55421          | None                                                                                                                                  | Molecular function unknown                               | Nucleus;Cytoplasm     | Unclassified                                             | Biological processes unknown                                                 | CC               | Yes                      |
| SLC39A7     | 7922    | zinc transporter SLC39A7 isoform 1 precursor                   | NP_008910.2       | 2          | 1                 | 1          | 1      | 1.5                                                      | 1.09                                                     |                                                                                        |                                                                                        |                                                                                               |                                                                                               | 1                                                                              | 1                                                                              | 9028    | 7922           | solute carrier family 39 (zinc transporter), member 7                                                                                 | Auxiliary transport protein activity                     | Plasma membrane       | Membrane transport protein                               | Transport                                                                    | TM,SP            | Yes                      |
| CRBN        | 51185   | protein cereblon isoform 1                                     | NP_057386.2       | 2          | 1                 | 1          | 3      | 1.5                                                      | 0.86                                                     |                                                                                        |                                                                                        |                                                                                               |                                                                                               | 1                                                                              | 1                                                                              | 16750   | 51185          | cereblon                                                                                                                              | Molecular function unknown                               | -                     | Unclassified                                             | Biological processes unknown                                                 | -                | Yes                      |
| PSMB3       | 5691    | proteasome subunit beta type-3                                 | NP_002786.2       | 1          | 8                 | 8          | 57     | 1.5                                                      | 0.81                                                     | 5.58                                                                                   | 5.42                                                                                   | 50.3                                                                                          | 25.4                                                                                          | 32                                                                             | 32                                                                             | 3709    | 5691           | proteasome (prosome, macropain) subunit, beta type, 3                                                                                 | Ubiquitin-specific protease activity                     | Cytoplasm             | Ubiquitin proteasome system protease                     | Protein metabolism                                                           | -                | Yes                      |
| NF1         | 4763    | neurofibromin isoform 1                                        | NP_001035957.1    | 2          | 1                 | 1          | 2      | 1.5                                                      | 0.67                                                     |                                                                                        |                                                                                        |                                                                                               |                                                                                               | 1                                                                              | 1                                                                              | 1203    | 4763           | neurofibromin 1 (neurofibromatosis vonRecklinghausen disease, Watson disease)                                                         | GTPase activator activity                                | Cytoplasm             | GTPase activating protein                                | Cell communication;Signal transduction                                       | RASGAP;SEC14     | Yes                      |
| LPGAT1      | 9926    | acyl-CoA:lysophosphatidylglycerol acyltransferase 1            | NP_055688.1       | 1          | 1                 | 1          | 3      | 1.49                                                     | 1.61                                                     | 40.72                                                                                  | 33.64                                                                                  | 104                                                                                           | 89.4                                                                                          | 2                                                                              | 2                                                                              | 14304   | 9926           | lysophosphatidylglycerol acyltransferase 1                                                                                            | Acyltransferase activity                                 | Endoplasmic reticulum | Enzyme: Acyltransferase                                  | Metabolism;Energy pathways                                                   | TM,PIEC          | Yes                      |
| UTP11L      | 51118   | probable U3 small nucleolar RNA-associated protein 11          | NP_057121.2       | 1          | 5                 | 5          | 7      | 1.49                                                     | 1.22                                                     | 2.78                                                                                   | 14.05                                                                                  | 8.3                                                                                           | 35.3                                                                                          | 4                                                                              | 4                                                                              | 16711   | 51118          | None                                                                                                                                  | RNA binding                                              | Nucleolus             | RNA binding protein                                      | Regulation of nucleobase, nucleoside, nucleotide and nucleic acid metabolism | NLS              | Yes                      |
| GSK3A       | 2931    | glycogen synthase kinase-3 alpha                               | NP_063937.2       | 1          | 3                 | 5          | 8      | 1.49                                                     | 1.09                                                     | 2.87                                                                                   | 2.92                                                                                   | 7.4                                                                                           | 5.5                                                                                           | 3                                                                              | 3                                                                              | 6002    | 2931           | glycogen synthase kinase 3 alpha                                                                                                      | Protein serine/threonine kinase activity                 | Cytoplasm             | Serine/threonine kinase                                  | Cell communication;Signal transduction                                       | S_T_kinase       | Yes                      |
| C5orf24     | 134553  | UPF0461 protein C5orf24 isoform 1                              | NP_689622.2       | 2          | 2                 | 2          | 3      | 1.49                                                     | 0.79                                                     | 7.45                                                                                   | 29.23                                                                                  | 15.8                                                                                          | 33.5                                                                                          | 2                                                                              | 2                                                                              | 8226    | 134553         | None                                                                                                                                  | Molecular function unknown                               | -                     | Unclassified                                             | Biological processes unknown                                                 | -                | No                       |

Supplementary Table S1. List of quantified proteins in OKF6/TERT1-Smoke cells  
 Raingonpalan *et al.*, 2017. Role of protein kinase N2 (PKN2) in cigarette smoke-mediated oncogenic transformation of oral cells

| Gene Symbol | Gene ID | Protein Description                                                          | Protein Accession | # Proteins | # Unique Peptides | # Peptides | # PSMs | OKF6/TERT1-Smoke/<br>OKF6/TERT1-Parental<br>(130/126) R1 | OKF6/TERT1-Smoke/<br>OKF6/TERT1-Parental<br>(128/127) R2 | Ratio Standard Errors [%]:<br>OKF6/TERT1-Smoke/<br>OKF6/TERT1-Parental<br>(130/126) R1 | Ratio Standard Errors [%]:<br>OKF6/TERT1-Smoke/<br>OKF6/TERT1-Parental<br>(128/127) R2 | Ratio Variabilities [%]:<br>F13: OKF6/TERT1-<br>Smoke/<br>OKF6/TERT1-Parental<br>(130/126) R1 | Ratio Variabilities [%]:<br>F13: OKF6/TERT1-<br>Smoke/<br>OKF6/TERT1-Parental<br>(128/127) R2 | Ratio Counts: F13:<br>OKF6/TERT1-Smoke/<br>OKF6/TERT1-Parental<br>(130/126) R1 | Ratio Counts: F13:<br>OKF6/TERT1-Smoke/<br>OKF6/TERT1-Parental<br>(128/127) R2 | HPRD ID | Entrez Gene ID | Gene Name                                                                               | Molecular Function                                            | Primary Localization | Molecular Class                     | Biological Process                                                           | Domains              | Plasma Proteome Database |
|-------------|---------|------------------------------------------------------------------------------|-------------------|------------|-------------------|------------|--------|----------------------------------------------------------|----------------------------------------------------------|----------------------------------------------------------------------------------------|----------------------------------------------------------------------------------------|-----------------------------------------------------------------------------------------------|-----------------------------------------------------------------------------------------------|--------------------------------------------------------------------------------|--------------------------------------------------------------------------------|---------|----------------|-----------------------------------------------------------------------------------------|---------------------------------------------------------------|----------------------|-------------------------------------|------------------------------------------------------------------------------|----------------------|--------------------------|
| ALDH1A3     | 220     | aldehyde dehydrogenase family 1 member A3 isoform 1                          | NP_000684.2       | 2          | 28                | 32         | 293    | 1.48                                                     | 1.82                                                     | 2.15                                                                                   | 1.53                                                                                   | 40.1                                                                                          | 34.9                                                                                          | 148                                                                            | 148                                                                            | 2713    | 220            | aldehyde dehydrogenase 1 family, member A3                                              | Catalytic activity                                            | Cytoplasm            | Enzyme: Dehydrogenase               | Metabolism;Energy pathways                                                   | -                    | Yes                      |
| CFL1        | 1072    | cofilin-1                                                                    | NP_005498.1       | 3          | 10                | 10         | 49     | 1.48                                                     | 1.56                                                     | 3.49                                                                                   | 3.05                                                                                   | 27.3                                                                                          | 25.1                                                                                          | 27                                                                             | 27                                                                             | 3261    | 1072           | cofilin 1 (non-muscle)                                                                  | Cytoskeletal protein binding                                  | Cytoplasm            | Cytoskeletal associated protein     | Cell growth and/or maintenance                                               | ADF/NLS              | Yes                      |
| CLIP2       | 7461    | CAP-Gly domain-containing linker protein 2 isoform 1                         | NP_003379.3       | 2          | 2                 | 3          | 5      | 1.48                                                     | 1.52                                                     | 1.98                                                                                   | 6.46                                                                                   | 4.2                                                                                           | 13.9                                                                                          | 2                                                                              | 2                                                                              | 9140    | 7461           | cytoplasmic linker 2                                                                    | Structural constituent of cytoskeleton                        | Cytoplasm            | Cytoskeletal protein                | Cell communication;Signal transduction                                       | CC                   | Yes                      |
| SEMA3C      | 10512   | semaphorin-3C precursor                                                      | NP_006370.1       | 1          | 9                 | 9          | 14     | 1.48                                                     | 1.42                                                     | 4.28                                                                                   | 10.66                                                                                  | 16.9                                                                                          | 41.6                                                                                          | 7                                                                              | 7                                                                              | 4034    | 10512          | sema domain, immunoglobulin domain (Ig), shortbasic domain, secreted, (semaphorin) 3C   | Receptor binding                                              | Extracellular        | Ligand                              | Cell communication;Signal transduction                                       | SP;SEMA;PSEIG        | Yes                      |
| NOLAL       | 140688  | nuclear protein 4-like isoform 1                                             | NP_001243727.1    | 8          | 3                 | 3          | 4      | 1.48                                                     | 1.38                                                     | 7.44                                                                                   | 22.6                                                                                   | 15.7                                                                                          | 46.3                                                                                          | 2                                                                              | 2                                                                              |         |                |                                                                                         |                                                               |                      |                                     |                                                                              |                      |                          |
| SLC38A1     | 81539   | sodium-coupled neutral amino acid transporter 1 isoform 2                    | NP_001265319.1    | 2          | 2                 | 2          | 5      | 1.48                                                     | 1.35                                                     | 4.41                                                                                   | 2.58                                                                                   | 11.3                                                                                          | 6.1                                                                                           | 3                                                                              | 3                                                                              | 12245   | 81539          | solute carrier family 38, member 1                                                      | Auxiliary transport protein activity                          | Plasma membrane      | Membrane transport protein          | Transport                                                                    | TM                   | Yes                      |
| CHCHD1      | 118487  | coiled-coil-helix-coiled-coil-helix domain-containing protein 1              | NP_976043.1       | 1          | 1                 | 1          | 2      | 1.48                                                     | 1.34                                                     |                                                                                        |                                                                                        |                                                                                               |                                                                                               | 1                                                                              | 1                                                                              | 12313   | 118487         | coiled-coil-helix-coiled-coil-helix domain-containing 1                                 | Molecular function unknown                                    | Nucleus              | Unclassified                        | Biological process unknown                                                   | -                    | No                       |
| CMIP        | 80790   | C-Maf-inducing protein isoform C-Mip                                         | NP_938204.2       | 2          | 2                 | 2          | 2      | 1.48                                                     | 1.25                                                     |                                                                                        |                                                                                        |                                                                                               |                                                                                               | 1                                                                              | 1                                                                              |         |                |                                                                                         |                                                               |                      |                                     |                                                                              |                      |                          |
| NFRKB       | 4798    | nuclear factor related to kappa-B-binding protein isoform 2                  | NP_006156.2       | 2          | 1                 | 1          | 1      | 1.48                                                     | 1.23                                                     |                                                                                        |                                                                                        |                                                                                               |                                                                                               | 1                                                                              | 1                                                                              | 1240    | 4798           | nuclear factor related to kappaB binding protein                                        | Transcription factor activity                                 | Nucleus              | Transcription factor                | Regulation of nucleobase, nucleotide and nucleic acid metabolism             | CC                   | No                       |
| SZT2        | 23334   | protein SZT2                                                                 | NP_056099.3       | 1          | 1                 | 1          | 1      | 1.48                                                     | 0.86                                                     |                                                                                        |                                                                                        |                                                                                               |                                                                                               | 1                                                                              | 1                                                                              |         |                |                                                                                         |                                                               |                      |                                     |                                                                              |                      |                          |
| PAAF1       | 80227   | proteasomal ATPase-associated factor 1 isoform 2                             | NP_079431.1       | 3          | 2                 | 2          | 2      | 1.47                                                     | 1.44                                                     |                                                                                        |                                                                                        |                                                                                               |                                                                                               | 1                                                                              | 1                                                                              | 7761    | 80227          | WD repeat domain 71                                                                     | Protein binding                                               | -                    | Ubiquitin proteasome system protein | Proteolysis and peptidolysis                                                 | WD40                 | No                       |
| GNAO1       | 2775    | guanine nucleotide-binding protein (G <sub>i</sub> ) subunit alpha isoform b | NP_620073.2       | 9          | 3                 | 6          | 43     | 1.47                                                     | 1.35                                                     | 1.35                                                                                   | 4.87                                                                                   | 3.4                                                                                           | 11.4                                                                                          | 3                                                                              | 3                                                                              | 757     | 2775           | guanine nucleotide binding protein (G protein), alpha activating activity polypeptide O | GTPase activity                                               | Plasma membrane      | G protein                           | Cell communication;Signal transduction                                       | -                    | Yes                      |
| AKT1S1      | 84335   | proline-rich AKT1 substrate 1 isoform a                                      | NP_115751.3       | 2          | 2                 | 2          | 3      | 1.47                                                     | 1.19                                                     | 1.48                                                                                   | 14.81                                                                                  | 3.1                                                                                           | 25.3                                                                                          | 2                                                                              | 2                                                                              | 12441   | 84335          | AKT1 substrate 1 (proline-rich)                                                         | Molecular function unknown                                    | Cytoplasm            | Unclassified                        | Biological process unknown                                                   | -                    | No                       |
| PLEKHG4     | 25894   | pleckstrin-1 isoform 1                                                       | NP_001123200.1    | 2          | 1                 | 1          | 1      | 1.47                                                     | 1.13                                                     |                                                                                        |                                                                                        |                                                                                               |                                                                                               | 1                                                                              | 1                                                                              | 10890   | 25894          | pleckstrin homology domain containing, family G (with RhoGef domain) member 4           | Molecular function unknown                                    | -                    | Unclassified                        | Biological process unknown                                                   | RHOGEF;PH            | No                       |
| ANP32A      | 8125    | acidic leucine-rich nuclear phosphoprotein 32 family member A                | NP_006296.1       | 3          | 5                 | 8          | 51     | 1.47                                                     | 1.12                                                     | 10.03                                                                                  | 12.37                                                                                  | 49.3                                                                                          | 45.8                                                                                          | 10                                                                             | 10                                                                             | 9014    | 8125           | acidic (leucine-rich) nuclear phosphoprotein 32 family, member A                        | MHC class I receptor activity;MHC class II receptor activity  | Nucleus              | MHC complex protein                 | Immune response                                                              | LRR                  | Yes                      |
| MED17       | 9440    | mediator of RNA polymerase II transcription subunit 17                       | NP_004259.3       | 1          | 2                 | 2          | 4      | 1.47                                                     | 0.91                                                     | 3.5                                                                                    | 6.4                                                                                    | 7.3                                                                                           | 8.3                                                                                           | 2                                                                              | 2                                                                              | 4816    | 9440           | cofactor required for Sp1 transcriptional activation, subunit 6, 77kDa                  | Transcription factor activity                                 | Nucleus              | Transcription factor                | Regulation of nucleobase, nucleoside, nucleotide and nucleic acid metabolism | -                    | Yes                      |
| PDCD2L      | 84306   | programmed cell death protein 2-like                                         | NP_115722.1       | 1          | 1                 | 1          | 2      | 1.47                                                     | 0.81                                                     |                                                                                        |                                                                                        |                                                                                               |                                                                                               | 1                                                                              | 1                                                                              | 17480   | 84306          | None                                                                                    | Molecular function unknown                                    | Cytoplasm            | Unclassified                        | Apoptosis                                                                    | -                    | No                       |
| TALDO1      | 6888    | transaldolase                                                                | NP_006746.1       | 1          | 18                | 18         | 80     | 1.46                                                     | 1.84                                                     | 2.16                                                                                   | 1.92                                                                                   | 21.3                                                                                          | 24                                                                                            | 45                                                                             | 45                                                                             | 3640    | 6888           | transaldolase 1                                                                         | Transferase activity, transferring aldehyde or ketonic groups | Nucleus              | Enzyme: Transaldolase               | Metabolism;Energy pathways                                                   | -                    | Yes                      |
| GCLC        | 2729    | glutamate-cysteine ligase catalytic subunit isoform a                        | NP_001489.1       | 2          | 14                | 14         | 42     | 1.46                                                     | 1.38                                                     | 4.31                                                                                   | 4.92                                                                                   | 28.7                                                                                          | 30.2                                                                                          | 20                                                                             | 19                                                                             | 6032    | 2729           | glutamate-cysteine ligase, catalytic subunit                                            | Ligase activity                                               | -                    | Enzyme: Ligase                      | Metabolism;Energy pathways                                                   | -                    | Yes                      |
| C3          | 718     | complement C3 precursor                                                      | NP_000055.2       | 1          | 14                | 14         | 42     | 1.46                                                     | 1.28                                                     | 4.26                                                                                   | 10.34                                                                                  | 30.6                                                                                          | 70.1                                                                                          | 23                                                                             | 23                                                                             | 400     | 718            | complement component 3                                                                  | Complement activity                                           | Extracellular        | Complement protein                  | Immune response                                                              | ANATO;A2M;C3;COLL;SP | Yes                      |
| Cbor33      | 65265   | UPR0488 protein Cbor33                                                       | NP_075568.1       | 1          | 2                 | 2          | 4      | 1.46                                                     | 1.18                                                     | 7.6                                                                                    | 1.02                                                                                   | 15.8                                                                                          | 1.7                                                                                           | 2                                                                              | 2                                                                              | 7951    | 65265          | None                                                                                    | Molecular function unknown                                    | -                    | Unclassified                        | Biological process unknown                                                   | -                    | No                       |
| PEX19       | 5824    | peroxisomal biogenesis factor 19 isoform a                                   | NP_002848.1       | 2          | 2                 | 2          | 3      | 1.46                                                     | 1.16                                                     | 3.16                                                                                   | 9.2                                                                                    | 6.5                                                                                           | 15.1                                                                                          | 2                                                                              | 2                                                                              | 2610    | 5824           | peroxisomal biogenesis factor 19                                                        | Protein binding                                               | Cytoplasm            | Integral membrane protein           | Cell communication;Signal transduction                                       | CAAX                 | No                       |
| UAP1L1      | 91373   | UDP-N-acetylglucosamine pyrophosphorylase-like protein 1                     | NP_997192.2       | 1          | 2                 | 3          | 8      | 1.46                                                     | 1.11                                                     |                                                                                        |                                                                                        |                                                                                               |                                                                                               | 1                                                                              | 1                                                                              | 15596   | 91373          | UDP-N-acetylglucosamine pyrophosphorylase 1-like 1                                      | Catalytic activity                                            | -                    | Enzyme: Phosphotransferase          | Metabolism;Energy pathways                                                   | -                    | No                       |
| CTDP1       | 9150    | RNA polymerase II subunit A C-terminal domain phosphatase isoform 1          | NP_004706.3       | 2          | 1                 | 1          | 2      | 1.46                                                     | 0.96                                                     |                                                                                        |                                                                                        |                                                                                               |                                                                                               | 1                                                                              | 1                                                                              | 5377    | 9150           | CTD (carboxy-terminal domain, RNA polymerase II, polypeptide A) phosphatase, subunit 1  | Transcription factor binding                                  | Nucleus;Cytoplasm    | Enzyme: Phosphatase                 | Transcription                                                                | BRCT;CPDc            | Yes                      |
| COL12A1     | 1303    | collagen alpha-1(XII) chain long isoform precursor                           | NP_004361.3       | 2          | 3                 | 3          | 6      | 1.46                                                     | 0.95                                                     | 12.09                                                                                  | 51.25                                                                                  | 25.4                                                                                          | 77.9                                                                                          | 2                                                                              | 2                                                                              | 377     | 1303           | collagen, type XII, alpha 1                                                             | Extracellular matrix structural constituent                   | Extracellular        | Extracellular matrix protein        | Cell growth and/or maintenance                                               | FN3;VWA;TSPN;COLL;SP | Yes                      |
| FLNB        | 2317    | filamin-B isoform 1                                                          | NP_001157789.1    | 1          | 2                 | 142        | 804    | 1.46                                                     | 0.64                                                     | 14.42                                                                                  | 118.13                                                                                 | 30.4                                                                                          | 146.3                                                                                         | 2                                                                              | 2                                                                              | 4543    | 2317           | filamin B, beta (actin binding protein 278)                                             | Cytoskeletal protein binding                                  | Cytoplasm            | Cytoskeletal associated protein     | Cell growth and/or maintenance                                               | CH;KIFLMN            | Yes                      |

Supplementary Table S1. List of quantified proteins in OKF6/TERT1-Smoke cells

Rajagopalan *et al.*, 2017. Role of protein kinase N2 (PKN2) in cigarette smoke-mediated oncogenic transformation of oral cells

| Gene Symbol | Gene ID | Protein Description                                        | Protein Accession | # Proteins | # Unique Peptides | # Peptides | # PSMs | OKF6/TERT1-Smoke/<br>OKF6/TERT1-Parental<br>(130/126) R1 | OKF6/TERT1-Smoke/<br>OKF6/TERT1-Parental<br>(128/127) R2 | Ratio Standard Errors [%]:<br>OKF6/TERT1-Smoke/<br>OKF6/TERT1-Parental<br>(130/126) R1 | Ratio Standard Errors [%]:<br>OKF6/TERT1-Smoke/<br>OKF6/TERT1-Parental<br>(128/127) R2 | Ratio Variabilities [%]:<br>F13: OKF6/TERT1-<br>Smoke/<br>OKF6/TERT1-Parental<br>(130/126) R1 | Ratio Variabilities [%]:<br>F13: OKF6/TERT1-<br>Smoke/<br>OKF6/TERT1-Parental<br>(128/127) R2 | Ratio Counts: F13:<br>OKF6/TERT1-Smoke/<br>OKF6/TERT1-Parental<br>(130/126) R1 | Ratio Counts: F13:<br>OKF6/TERT1-Smoke/<br>OKF6/TERT1-Parental<br>(128/127) R2 | HPRD ID | Entrez Gene ID | Gene Name                                               | Molecular Function                           | Primary Localization    | Molecular Class                                    | Biological Process                                               | Domains        | Plasma Proteome Database |
|-------------|---------|------------------------------------------------------------|-------------------|------------|-------------------|------------|--------|----------------------------------------------------------|----------------------------------------------------------|----------------------------------------------------------------------------------------|----------------------------------------------------------------------------------------|-----------------------------------------------------------------------------------------------|-----------------------------------------------------------------------------------------------|--------------------------------------------------------------------------------|--------------------------------------------------------------------------------|---------|----------------|---------------------------------------------------------|----------------------------------------------|-------------------------|----------------------------------------------------|------------------------------------------------------------------|----------------|--------------------------|
| PPP1R2      | 5504    | protein phosphatase inhibitor 2 isoform 1                  | NP_001278433.1    | 3          | 2                 | 2          | 4      | 1.46                                                     | 0.62                                                     | 19.67                                                                                  | 56.69                                                                                  | 42.2                                                                                          | 53.4                                                                                          | 2                                                                              | 2                                                                              | 3478    | 5504           | protein phosphatase 1, regulatory (inhibitor)/subunit 2 | Protein binding                              | Cytoplasm               | Cell cycle control protein                         | Cell communication,Signal transduction                           | -              | No                       |
| HDFGRP2     | 84717   | hepatoma-derived growth factor-related protein 2 isoform 1 | NP_001001520.1    | 2          | 9                 | 10         | 20     | 1.45                                                     | 1.39                                                     | 3.89                                                                                   | 10.53                                                                                  | 18                                                                                            | 48.9                                                                                          | 10                                                                             | 10                                                                             |         |                |                                                         |                                              |                         |                                                    |                                                                  |                |                          |
| GOSR1       | 9527    | Golgi SNAP receptor complex member 1 isoform 1             | NP_004862.1       | 3          | 2                 | 2          | 4      | 1.45                                                     | 1.36                                                     | 23.01                                                                                  | 3.97                                                                                   | 49.9                                                                                          | 7.7                                                                                           | 2                                                                              | 2                                                                              | 4936    | 9527           | golgi SNAP receptor complex member 1                    | Auxiliary transport protein activity         | Golgi apparatus:Nucleus | Membrane transport protein                         | Transport                                                        | TM             | Yes                      |
| CCDC86      | 79080   | coiled-coil domain-containing protein 86                   | NP_077003.1       | 1          | 5                 | 5          | 6      | 1.45                                                     | 1.34                                                     | 7.08                                                                                   | 3.05                                                                                   | 23.2                                                                                          | 9.1                                                                                           | 5                                                                              | 5                                                                              | 8322    | 79080          | None                                                    | Molecular function unknown                   | Nucleus                 | Unclassified                                       | Biological process unknown                                       | CC             | No                       |
| LYRM4       | 57128   | LYR motif-containing protein 4 isoform 2                   | NP_001158312.1    | 3          | 1                 | 1          | 4      | 1.45                                                     | 1.21                                                     | 1.81                                                                                   | 2.05                                                                                   | 3.7                                                                                           | 3.5                                                                                           | 2                                                                              | 2                                                                              | 12855   | 57128          | chromosome 6 open reading frame 149                     | Molecular function unknown                   | -                       | Unclassified                                       | Biological process unknown                                       | -              | No                       |
| AATF        | 26574   | protein AATF                                               | NP_036270.1       | 1          | 7                 | 7          | 17     | 1.45                                                     | 1.2                                                      | 2.64                                                                                   | 8.07                                                                                   | 11.6                                                                                          | 29.7                                                                                          | 9                                                                              | 9                                                                              | 12236   | 26574          | apoptosis antagonizing transcription factor             | Transcription factor activity                | Nucleus                 | Transcription factor                               | Apoptosis                                                        | LZ,NLS         | No                       |
| CD2BP2      | 10421   | CD2 antigen cytoplasmic tail-binding protein 2             | NP_001230575.1    | 1          | 5                 | 5          | 9      | 1.45                                                     | 1.1                                                      | 2.11                                                                                   | 8.4                                                                                    | 6.9                                                                                           | 20.9                                                                                          | 5                                                                              | 5                                                                              | 5127    | 10421          | CD2 antigen (cytoplasmic tail) binding protein2         | Molecular function unknown                   | Cytoplasm               | Unclassified                                       | Cell communication,Signal transduction                           | -              | Yes                      |
| CWC15       | 51503   | spliceosome-associated protein CWC15 homolog               | NP_057487.2       | 1          | 3                 | 3          | 9      | 1.45                                                     | 0.91                                                     | 6.09                                                                                   | 8.77                                                                                   | 22                                                                                            | 19.8                                                                                          | 6                                                                              | 6                                                                              | 13703   | 51503          | None                                                    | Molecular function unknown                   | Nucleus                 | Unclassified                                       | Biological process unknown                                       | CC             | Yes                      |
| CDC34       | 997     | ubiquitin-conjugating enzyme E2 R1                         | NP_004350.1       | 1          | 1                 | 2          | 3      | 1.45                                                     | 0.9                                                      |                                                                                        |                                                                                        |                                                                                               |                                                                                               | 1                                                                              | 1                                                                              | 306     | 997            | cell division cycle 34                                  | Ligase activity                              | Nucleus                 | Enzyme: Ligase                                     | Protein metabolism                                               | UBC            | No                       |
| XIRP2       | 129446  | sin actin-binding repeat-containing protein 2 isoform 1    | NP_689594.4       | 2          | 1                 | 1          | 1      | 1.45                                                     | 0.65                                                     |                                                                                        |                                                                                        |                                                                                               |                                                                                               | 1                                                                              | 1                                                                              | 10267   | 129446         | cardiomyopathy associated 3                             | Cytoskeletal protein binding                 | -                       | Anchor protein,Unclassified                        | Cytoskeletal anchoring                                           | CC,LIM         | Yes                      |
| ALKBH5      | 54890   | RNA demethylase ALKBH5                                     | NP_060228.3       | 1          | 1                 | 1          | 8      | 1.44                                                     | 1.87                                                     | 16.52                                                                                  | 15.17                                                                                  | 43                                                                                            | 61.5                                                                                          | 3                                                                              | 4                                                                              | 8621    | 54890          | None                                                    | Molecular function unknown                   | Nucleus                 | Unclassified                                       | Biological process unknown                                       | -              | No                       |
| NSUN2       | 54888   | rRNA (cytosine(34)-C(5)-methyltransferase isoform 1        | NP_060225.4       | 2          | 19                | 19         | 60     | 1.44                                                     | 1.5                                                      | 2.97                                                                                   | 5.83                                                                                   | 23.5                                                                                          | 50                                                                                            | 29                                                                             | 29                                                                             | 8620    | 54888          | NOL1/NOP2/Sun domain family, member 2                   | RNA methyltransferase activity               | Nucleolus               | RNA methyltransferase                              | -                                                                | -              | Yes                      |
| CENPV       | 201161  | centromere protein V                                       | NP_859067.2       | 1          | 3                 | 3          | 7      | 1.44                                                     | 1.32                                                     | 16.7                                                                                   | 10.85                                                                                  | 43.5                                                                                          | 25.3                                                                                          | 3                                                                              | 3                                                                              | 12173   | 201161         | proline rich 6                                          | DNA binding                                  | Nucleus                 | DNA binding protein                                | Regulation of nucleobase, nucleotide and nucleic acid metabolism | -              | No                       |
| RAE1        | 8480    | mRNA export factor                                         | NP_001015885.1    | 1          | 5                 | 5          | 7      | 1.44                                                     | 1.29                                                     | 2.9                                                                                    | 18.05                                                                                  | 8.4                                                                                           | 49.1                                                                                          | 4                                                                              | 4                                                                              | 11939   | 8480           | RAE1 RNA export 1 homolog (S. pombe)                    | RNA binding                                  | Nucleus                 | RNA binding protein                                | Regulation of nucleobase, nucleotide and nucleic acid metabolism | WD40           | Yes                      |
| FREM2       | 341640  | FRAS1-related extracellular matrix protein 2 precursor     | NP_997244.4       | 1          | 1                 | 1          | 1      | 1.44                                                     | 1.27                                                     |                                                                                        |                                                                                        |                                                                                               |                                                                                               | 1                                                                              | 1                                                                              | 10602   | 341640         | FRAS1 related extracellular matrix protein 2            | Extracellular structural constituent         | Extracellular           | Extracellular matrix protein                       | Cell growth and/or maintenance                                   | CALXB:TM       | No                       |
| PGP         | 283871  | phosphoglycolate phosphatase                               | NP_001035830.1    | 1          | 7                 | 7          | 15     | 1.44                                                     | 1.15                                                     | 6.71                                                                                   | 11.97                                                                                  | 27.9                                                                                          | 40.4                                                                                          | 8                                                                              | 8                                                                              | 19077   | 283871         | None                                                    | Molecular function unknown                   | -                       | Unclassified                                       | Biological process unknown                                       | -              | No                       |
| TPM3        | 7170    | tropomyosin alpha-3 chain isoform Tpm3.12a                 | NP_689476.2       | 1          | 2                 | 16         | 42     | 1.44                                                     | 0.87                                                     |                                                                                        |                                                                                        |                                                                                               |                                                                                               | 1                                                                              | 1                                                                              | 1840    | 7170           | tropomyosin 3                                           | Cytoskeletal protein binding                 | Cytoplasm               | Cytoskeletal associated protein:Structural protein | Cell growth and/or maintenance                                   | CC             | Yes                      |
| YY1         | 7528    | transcriptional repressor protein YY1                      | NP_003394.1       | 3          | 2                 | 2          | 6      | 1.44                                                     | 0.81                                                     | 19.88                                                                                  | 6.72                                                                                   | 42.2                                                                                          | 7.7                                                                                           | 2                                                                              | 2                                                                              | 2482    | 7528           | YY1 transcription factor                                | Transcription factor activity                | Nucleus                 | Transcription factor                               | Regulation of nucleobase, nucleotide and nucleic acid metabolism | ZNFC2          | Yes                      |
| LTF         | 4057    | lactotransferrin isoform 1 precursor                       | NP_002334.2       | 2          | 1                 | 1          | 2      | 1.44                                                     | 0.63                                                     |                                                                                        |                                                                                        |                                                                                               |                                                                                               | 1                                                                              | 1                                                                              | 1028    | 4057           | lactotransferrin                                        | Transporter activity                         | Secretory granule       | Transport/cargo protein                            | Transport                                                        | SP:TR_FER,NLS  | Yes                      |
| PRKCSH      | 5589    | glucosylase 2 subunit beta isoform 3 precursor             | NP_001276032.1    | 3          | 20                | 20         | 113    | 1.43                                                     | 1.6                                                      | 4.53                                                                                   | 7.57                                                                                   | 48.7                                                                                          | 105.5                                                                                         | 51                                                                             | 51                                                                             | 3518    | 5589           | protein kinase C substrate 80K-H                        | Glucosylase activity                         | Endoplasmic reticulum   | Regulatory/other subunit                           | Energy pathways:Metabolism                                       | SP:LLA,CC      | Yes                      |
| SQSTM1      | 8878    | sequestosome-1 isoform 1                                   | NP_003891.1       | 2          | 14                | 14         | 56     | 1.43                                                     | 1.39                                                     | 4.07                                                                                   | 6.96                                                                                   | 32.6                                                                                          | 57.1                                                                                          | 30                                                                             | 30                                                                             | 3319    | 8878           | sequestosome 1                                          | Ubiquitin-specific protease activity         | Cytoplasm:Nucleus       | Ubiquitin proteasome system protein                | Protein metabolism                                               | PB1:ZnF_ZZ,UBA | No                       |
| NUP43       | 348995  | nucleoporin Nup43                                          | NP_942590.1       | 1          | 2                 | 2          | 3      | 1.43                                                     | 1.28                                                     |                                                                                        |                                                                                        |                                                                                               |                                                                                               | 1                                                                              | 1                                                                              | 12174   | 348995         | nucleoporin 43kDa                                       | Transporter activity                         | Nucleus                 | Transport/cargo protein                            | Transport                                                        | WD40           | Yes                      |
| ZC3H11A     | 9877    | zinc finger CCCH domain-containing protein 11A             | NP_055642.3       | 1          | 9                 | 9          | 18     | 1.43                                                     | 1.24                                                     | 6.38                                                                                   | 8.1                                                                                    | 29.5                                                                                          | 32.6                                                                                          | 10                                                                             | 10                                                                             | 11100   | 9877           | zinc finger CCCH type containing 11A                    | DNA binding                                  | Nucleus                 | DNA binding protein                                | Regulation of nucleobase, nucleotide and nucleic acid metabolism | ZnF_C3H1       | Yes                      |
| HBA1        | 3039    | hemoglobin subunit alpha                                   | NP_000549.1       | 2          | 4                 | 4          | 251    | 1.43                                                     | 0.56                                                     | 1.15                                                                                   | 3.49                                                                                   | 21.4                                                                                          | 25.8                                                                                          | 167                                                                            | 167                                                                            | 784     | 3039           | hemoglobin, alpha 1                                     | Transporter activity                         | -                       | Transport/cargo protein                            | Transport                                                        | -              | Yes                      |
| DVL1        | 1855    | segment polarity protein dishevelled homolog DVL-1         | NP_004412.2       | 1          | 1                 | 1          | 2      | 1.43                                                     | 0.54                                                     |                                                                                        |                                                                                        |                                                                                               |                                                                                               | 1                                                                              | 1                                                                              | 3220    | 1855           | dishevelled, dsh homolog 1 (Drosophila)                 | Receptor signaling complex scaffold activity | Cytoplasm               | Adapter molecule                                   | Cell communication,Signal transduction                           | DSH:PDZ        | Yes                      |
| HNRNPDL     | 9987    | heterogeneous nuclear ribonucleoprotein D-like isoform a   | NP_112740.1       | 2          | 4                 | 6          | 19     | 1.42                                                     | 1.95                                                     | 4.26                                                                                   | 6.33                                                                                   | 12.1                                                                                          | 25.1                                                                                          | 4                                                                              | 4                                                                              |         |                |                                                         |                                              |                         |                                                    |                                                                  |                |                          |
| GOLM1       | 51280   | Golgi membrane protein 1                                   | NP_057632.2       | 1          | 2                 | 2          | 2      | 1.42                                                     | 1.74                                                     | 8.81                                                                                   | 19.67                                                                                  | 17.8                                                                                          | 51.4                                                                                          | 2                                                                              | 2                                                                              | 8428    | 51280          | golgi phosphoprotein 2                                  | Transporter activity                         | Golgi apparatus         | Transport/cargo protein                            | Transport                                                        | CC:TM          | Yes                      |
| LEO1        | 123169  | RNA polymerase-associated protein LEO1 isoform 1           | NP_620147.1       | 2          | 4                 | 4          | 11     | 1.42                                                     | 1.43                                                     | 2.43                                                                                   | 4.61                                                                                   | 8.4                                                                                           | 16.3                                                                                          | 6                                                                              | 6                                                                              | 11231   | 123169         | None                                                    | Molecular function unknown                   | Nucleus:Cytoplasm       | Unclassified                                       | Biological process unknown                                       | -              | No                       |
| CEBPB       | 1051    | CCAAT/enhancer-binding protein beta isoform a              | NP_005185.2       | 3          | 1                 | 1          | 2      | 1.42                                                     | 1.36                                                     |                                                                                        |                                                                                        |                                                                                               |                                                                                               | 1                                                                              | 1                                                                              | 1801    | 1051           | CCAAT/enhancer binding protein (C/EBP), beta            | Transcription factor activity                | Nucleus                 | Transcription factor                               | Regulation of nucleobase, nucleotide and nucleic acid metabolism | BRLZ:CC        | Yes                      |
| MYADM       | 91663   | myeloid-associated differentiation marker                  | NP_612382.1       | 1          | 2                 | 2          | 18     | 1.42                                                     | 1.28                                                     | 8.07                                                                                   | 13.16                                                                                  | 35.3                                                                                          | 54.2                                                                                          | 9                                                                              | 9                                                                              | 14792   | 91663          | myeloid-associated differentiation marker               | Molecular function unknown                   | -                       | Unclassified                                       | Biological process unknown                                       | TM             | Yes                      |



Supplementary Table S1. List of quantified proteins in OKF6/TERT1-Smoke cells  
 Raingonalan *et al.*, 2017. Role of protein kinase N2 (PKN2) in cigarette smoke-mediated oncogenic transformation of oral cells

| Gene Symbol | Gene ID | Protein Description                                                                                       | Protein Accession | # Proteins | # Unique Peptides | # Peptides | # PSMs | OKF6/TERT1-Smoke/<br>OKF6/TERT1-Parental<br>(130/126) R1 | OKF6/TERT1-Smoke/<br>OKF6/TERT1-Parental<br>(128/127) R2 | Ratio Standard Errors [%]:<br>OKF6/TERT1-Smoke/<br>OKF6/TERT1-Parental<br>(130/126) R1 | Ratio Standard Errors [%]:<br>OKF6/TERT1-Smoke/<br>OKF6/TERT1-Parental<br>(128/127) R2 | Ratio Variabilities [%]:<br>F13: OKF6/TERT1-<br>Smoke/<br>OKF6/TERT1-Parental<br>(130/126) R1 | Ratio Variabilities [%]:<br>F13: OKF6/TERT1-<br>Smoke/<br>OKF6/TERT1-Parental<br>(128/127) R2 | Ratio Counts: F13:<br>OKF6/TERT1-Smoke/<br>OKF6/TERT1-Parental<br>(130/126) R1 | Ratio Counts: F13:<br>OKF6/TERT1-Smoke/<br>OKF6/TERT1-Parental<br>(128/127) R2 | HPRD ID | Entrez Gene Id | Gene Name                                                                                                          | Molecular Function                     | Primary Localization                  | Molecular Class                     | Biological Process                                                           | Domains            | Plasma Proteome Database |
|-------------|---------|-----------------------------------------------------------------------------------------------------------|-------------------|------------|-------------------|------------|--------|----------------------------------------------------------|----------------------------------------------------------|----------------------------------------------------------------------------------------|----------------------------------------------------------------------------------------|-----------------------------------------------------------------------------------------------|-----------------------------------------------------------------------------------------------|--------------------------------------------------------------------------------|--------------------------------------------------------------------------------|---------|----------------|--------------------------------------------------------------------------------------------------------------------|----------------------------------------|---------------------------------------|-------------------------------------|------------------------------------------------------------------------------|--------------------|--------------------------|
| NUDT16L1    | 84309   | protein syndesmosis isoform 1                                                                             | NP_115725.1       | 1          | 2                 | 2          | 5      | 1.4                                                      | 1.17                                                     | 6.23                                                                                   | 14.84                                                                                  | 15.2                                                                                          | 30.9                                                                                          | 3                                                                              | 3                                                                              | 15309   | 84309          | nudix (nucleoside diphosphate linked moiety(X))-type motif 16-like 1                                               | Molecular function unknown             | -                                     | Unclassified                        | Cell communication;Signal transduction                                       | -                  | No                       |
| GRPEL1      | 80273   | grpE protein homolog 1, mitochondrial precursor                                                           | NP_079472.1       | 1          | 4                 | 4          | 9      | 1.4                                                      | 1.17                                                     | 1.12                                                                                   | 3.32                                                                                   | 3.5                                                                                           | 8.7                                                                                           | 5                                                                              | 5                                                                              | 7550    | 80273          | GrpE-like 1, mitochondrial (E. coli)                                                                               | Chaperone activity                     | Mitochondrion                         | Chaperone                           | Protein metabolism                                                           | CC                 | No                       |
| EHP1L1      | 254102  | EH domain-binding protein 1-like protein 1                                                                | NP_001092879.1    | 1          | 8                 | 8          | 21     | 1.4                                                      | 1.15                                                     | 11.52                                                                                  | 10.01                                                                                  | 51.4                                                                                          | 35.5                                                                                          | 9                                                                              | 9                                                                              | 19384   | 254102         | EH domain binding protein 1-like 1                                                                                 | Molecular function unknown             | -                                     | Unclassified                        | Biological process unknown                                                   | CH,CC              | Yes                      |
| ATAD3B      | 83858   | ATPase family AAA domain-containing protein 3B                                                            | NP_114127.3       | 1          | 2                 | 15         | 25     | 1.4                                                      | 1.13                                                     |                                                                                        |                                                                                        |                                                                                               |                                                                                               | 1                                                                              | 1                                                                              | 10679   | 83858          | ATPase family, AAA domain containing 3B                                                                            | ATPase activity                        | Mitochondrion                         | ATPase                              | Metabolism;Energy pathways                                                   | CC;AAA             | No                       |
| RPL35       | 11224   | 60S ribosomal protein L35                                                                                 | NP_009140.1       | 1          | 4                 | 4          | 13     | 1.4                                                      | 1                                                        | 6.17                                                                                   | 12.86                                                                                  | 24.8                                                                                          | 37.8                                                                                          | 8                                                                              | 8                                                                              | 10200   | 11224          | ribosomal protein L35                                                                                              | Structural constituent of ribosome     | Ribosome                              | Ribosomal subunit                   | Protein metabolism                                                           | CC                 | Yes                      |
| BTF3L4      | 91408   | transcription factor BTF3 homolog 4 isoform 1                                                             | NP_689478.1       | 2          | 1                 | 1          | 10     | 1.4                                                      | 0.91                                                     | 0.79                                                                                   | 7.02                                                                                   | 2.5                                                                                           | 14.3                                                                                          | 5                                                                              | 5                                                                              | 17521   | 91408          | basic transcription factor 3-like 4                                                                                | Molecular function unknown             | -                                     | Unclassified                        | Biological process unknown                                                   | -                  | No                       |
| SPTBN1      | 6711    | spectrin beta chain, non-erythrocytic 1 isoform 2                                                         | NP_842565.2       | 4          | 1                 | 74         | 218    | 1.4                                                      | 0.9                                                      |                                                                                        |                                                                                        |                                                                                               |                                                                                               | 1                                                                              | 1                                                                              | 1683    | 6711           | spectrin, beta, non-erythrocytic 1                                                                                 | Structural constituent of cytoskeleton | Cytoskeleton                          | Cytoskeletal protein                | Cell growth and/or maintenance                                               | SPECTRIN;CC;P H,CH | Yes                      |
| CDK4        | 1019    | cyclin-dependent kinase 4                                                                                 | NP_000066.1       | 46         | 1                 | 2          | 18     | 1.4                                                      | 0.87                                                     |                                                                                        |                                                                                        |                                                                                               |                                                                                               | 1                                                                              | 1                                                                              | 447     | 1019           | cyclin-dependent kinase 4                                                                                          | Kinase activity                        | Cytoplasm                             | Cell cycle control protein          | Cell communication;Signal transduction                                       | S_T_kinase         | Yes                      |
| TRMT61A     | 115708  | tRNA (adenine(58)-N(1))-methyltransferase catalytic subunit TRMT61A                                       | NP_689520.2       | 1          | 3                 | 3          | 5      | 1.4                                                      | 0.85                                                     | 4.02                                                                                   |                                                                                        | 51.5                                                                                          | 7.9                                                                                           | 2                                                                              | 2                                                                              | 8810    | 115708         | chromosome 14 open reading frame 172                                                                               | RNA methyltransferase activity         | -                                     | RNA methyltransferase               | Regulation of nucleobase, nucleoside, nucleotide and nucleic acid metabolism | -                  | No                       |
| FLNB        | 2317    | filamin-B isoform 2                                                                                       | NP_001448.2       | 3          | 1                 | 141        | 838    | 1.4                                                      | 0.82                                                     | 7.09                                                                                   | 27.11                                                                                  | 38.4                                                                                          | 94.8                                                                                          | 14                                                                             | 13                                                                             | 4543    | 2317           | filamin B, beta (actin binding protein 278)                                                                        | Cytoskeletal protein binding           | Cytoplasm                             | Cytoskeletal associated protein     | Cell growth and/or maintenance                                               | CH;GFLMN           | Yes                      |
| SMARCB1     | 6598    | SWI/SNF-related, matrix associated, actin-dependent regulator of chromatin subfamily B member 1 isoform a | NP_003064.2       | 2          | 4                 | 4          | 7      | 1.4                                                      | 0.81                                                     | 2.22                                                                                   | 9.99                                                                                   | 5.4                                                                                           | 14.1                                                                                          | 3                                                                              | 3                                                                              | 3364    | 6598           | SWI/SNF-related, matrix associated, actin-dependent regulator of chromatin, subfamily b, member 1                  | DNA binding                            | Nucleus                               | Unclassified                        | Regulation of nucleobase, nucleoside, nucleotide and nucleic acid metabolism | -                  | Yes                      |
| EHMT1       | 79813   | histone-lysine N-methyltransferase EHMT1 isoform 1                                                        | NP_079033.4       | 2          | 3                 | 3          | 5      | 1.4                                                      | 0.69                                                     | 15.44                                                                                  | 11.17                                                                                  | 31.3                                                                                          | 11                                                                                            | 2                                                                              | 2                                                                              | 7383    | 79813          | euchromatic histone-lysine N-methyltransferase1                                                                    | Methyltransferase activity             | Nucleus                               | Enzyme: Methyltransferase           | Regulation of nucleobase, nucleoside, nucleotide and nucleic acid metabolism | ANK;SET            | Yes                      |
| RABL2B      | 11158   | rab-like protein 2B isoform 3                                                                             | NP_001124395.1    | 7          | 2                 | 2          | 4      | 1.4                                                      | 0.68                                                     | 31.35                                                                                  | 7.48                                                                                   | 68.8                                                                                          | 7.2                                                                                           | 2                                                                              | 2                                                                              | 10395   | 11158          | RAB, member of RAS oncogene family-like 2B                                                                         | GTPase activity                        | -                                     | GTPase                              | Cell communication;Signal transduction                                       | RAS;Small_GTPase   | No                       |
| C1orf50     | 79078   | uncharacterized protein C1orf50                                                                           | NP_077002.2       | 1          | 1                 | 1          | 2      | 1.4                                                      | 0.59                                                     |                                                                                        |                                                                                        |                                                                                               |                                                                                               | 1                                                                              | 1                                                                              | 14714   | 79078          | chromosome 1 open reading frame 50                                                                                 | Molecular function unknown             | -                                     | Unclassified                        | Biological process unknown                                                   | CC                 | No                       |
| HSPA5       | 3309    | 78 kDa glucose-regulated protein precursor                                                                | NP_005338.1       | 3          | 43                | 45         | 503    | 1.39                                                     | 1.51                                                     | 1.81                                                                                   | 1.76                                                                                   | 40.7                                                                                          | 43.1                                                                                          | 242                                                                            | 242                                                                            | 682     | 3309           | heat shock 70kDa protein 5 (glucose-regulated protein, 78kDa)                                                      | Chaperone activity                     | Endoplasmic reticulum                 | Chaperone                           | Protein metabolism                                                           | SP;CC              | Yes                      |
| PLD3        | 23646   | phospholipase D3                                                                                          | NP_036400.2       | 1          | 8                 | 8          | 18     | 1.39                                                     | 1.43                                                     | 4.52                                                                                   | 5.42                                                                                   | 21.1                                                                                          | 26.2                                                                                          | 11                                                                             | 11                                                                             | 7148    | 23646          | phospholipase D family, member 3                                                                                   | Phospholipase activity                 | Endoplasmic reticulum;Golgi apparatus | Enzyme: Phospholipase               | Metabolism;Energy pathways                                                   | PLDc;TM            | No                       |
| ACO1        | 48      | cytoplasmic aconitate hydratase                                                                           | NP_001265281.1    | 1          | 29                | 29         | 100    | 1.39                                                     | 1.42                                                     | 3.46                                                                                   | 2.67                                                                                   | 35.7                                                                                          | 27.8                                                                                          | 52                                                                             | 52                                                                             | 13      | 48             | aconitase 1, soluble                                                                                               | Isonerastase activity                  | Cytoplasm                             | Enzyme: Isonerastase                | Regulation of nucleobase, nucleoside, nucleotide and nucleic acid metabolism | -                  | Yes                      |
| ITCH        | 83737   | E3 ubiquitin-protein ligase Itchy homolog isoform 1                                                       | NP_001244066.1    | 5          | 13                | 14         | 28     | 1.39                                                     | 1.42                                                     | 6.73                                                                                   | 5.11                                                                                   | 38.8                                                                                          | 29.5                                                                                          | 16                                                                             | 16                                                                             | 7565    | 83737          | itchy homolog E3 ubiquitin protein ligase(mouse)                                                                   | Ubiquitin-specific protease activity   | Endosome                              | Ubiquitin proteasome system protein | Regulation of signal transduction                                            | C2;WW;HECT         | Yes                      |
| GLTSCR2     | 29997   | glioma tumor suppressor candidate region gene 2 protein                                                   | NP_056525.2       | 1          | 2                 | 2          | 5      | 1.39                                                     | 1.38                                                     | 4.35                                                                                   | 4.02                                                                                   | 10.5                                                                                          | 9.6                                                                                           | 3                                                                              | 3                                                                              | 16142   | 29997          | glioma tumor suppressor candidate region gene2                                                                     | Molecular function unknown             | Nucleus                               | Unclassified                        | Biological process unknown                                                   | -                  | Yes                      |
| NCL         | 4691    | nucleolin                                                                                                 | NP_005372.2       | 1          | 42                | 42         | 233    | 1.39                                                     | 1.37                                                     | 1.98                                                                                   | 2.3                                                                                    | 30.4                                                                                          | 35                                                                                            | 116                                                                            | 116                                                                            | 1245    | 4691           | nucleolin                                                                                                          | RNA binding                            | Nucleolus                             | RNA binding protein                 | Regulation of nucleobase, nucleoside, nucleotide and nucleic acid metabolism | RRM                | Yes                      |
| PAD6        | 353238  | protein-arginine deiminase type-6                                                                         | NP_997304.3       | 1          | 1                 | 1          | 1      | 1.39                                                     | 1.36                                                     |                                                                                        |                                                                                        |                                                                                               |                                                                                               | 1                                                                              | 1                                                                              | 15095   | 353238         | peptidyl arginine deiminase, type VI                                                                               | Hydrolase activity                     | -                                     | Enzyme: Hydrolase                   | Metabolism;Energy pathways                                                   | -                  | Yes                      |
| BTF3        | 689     | transcription factor BTF3 isoform A                                                                       | NP_001032726.1    | 1          | 3                 | 13         | 117    | 1.39                                                     | 1.34                                                     | 11.2                                                                                   | 10.2                                                                                   | 31.9                                                                                          | 27.9                                                                                          | 4                                                                              | 4                                                                              | 3966    | 689            | basic transcription factor 3                                                                                       | Transcription factor activity          | Nucleus                               | Transcription factor                | Regulation of nucleobase, nucleoside, nucleotide and nucleic acid metabolism | -                  | Yes                      |
| SERPINH1    | 871     | serpin H1 precursor                                                                                       | NP_001226.2       | 1          | 24                | 24         | 110    | 1.39                                                     | 1.34                                                     | 3.49                                                                                   | 5.39                                                                                   | 39.2                                                                                          | 60.9                                                                                          | 61                                                                             | 61                                                                             | 2968    | 871            | serine (or cysteine) proteinase inhibitor, clade H (heat shock protein 47), member 1, (collagen binding protein 1) | Heat shock protein activity            | Endoplasmic reticulum                 | Heat shock protein                  | Protein metabolism                                                           | SP;SERPIN          | Yes                      |

Supplementary Table S1. List of quantified proteins in OKF6/TERT1-Smoke cells  
 Raigopaln *et al.*, 2017. Role of protein kinase N2 (PKN2) in cigarette smoke-mediated oncogenic transformation of oral cells

| Gene Symbol | Gene ID | Protein Description                                                                                               | Protein Accession | # Proteins | # Unique Peptides | # Peptides | # PSMs | OKF6/TERT1-Smoke/<br>OKF6/TERT1-Parental<br>(130/126) R1 | OKF6/TERT1-Smoke/<br>OKF6/TERT1-Parental<br>(128/127) R2 | Ratio Standard Errors [%]:<br>OKF6/TERT1-Smoke/<br>OKF6/TERT1-Parental<br>(130/126) R1 | Ratio Standard Errors [%]:<br>OKF6/TERT1-Smoke/<br>OKF6/TERT1-Parental<br>(128/127) R2 | Ratio Variabilities [%]:<br>F13: OKF6/TERT1-<br>Smoke/<br>OKF6/TERT1-Parental<br>(130/126) R1 | Ratio Variabilities [%]:<br>F13: OKF6/TERT1-<br>Smoke/<br>OKF6/TERT1-Parental<br>(128/127) R2 | Ratio Counts: F13:<br>OKF6/TERT1-Smoke/<br>OKF6/TERT1-Parental<br>(130/126) R1 | Ratio Counts: F13:<br>OKF6/TERT1-Smoke/<br>OKF6/TERT1-Parental<br>(128/127) R2 | HPRD ID | Entrez Gene ID | Gene Name                                                                        | Molecular Function                            | Primary Localization                     | Molecular Class                     | Biological Process                                                                     | Domains           | Plasma Proteome Database |  |
|-------------|---------|-------------------------------------------------------------------------------------------------------------------|-------------------|------------|-------------------|------------|--------|----------------------------------------------------------|----------------------------------------------------------|----------------------------------------------------------------------------------------|----------------------------------------------------------------------------------------|-----------------------------------------------------------------------------------------------|-----------------------------------------------------------------------------------------------|--------------------------------------------------------------------------------|--------------------------------------------------------------------------------|---------|----------------|----------------------------------------------------------------------------------|-----------------------------------------------|------------------------------------------|-------------------------------------|----------------------------------------------------------------------------------------|-------------------|--------------------------|--|
| PPM1G       | 5496    | protein phosphatase 1G                                                                                            | NP_817092.1       | 1          | 18                | 18         | 52     | 1.39                                                     | 1.28                                                     | 3.37                                                                                   | 4.09                                                                                   | 25.1                                                                                          | 28.2                                                                                          | 28                                                                             | 28                                                                             | 9237    | 5496           | protein phosphatase 1G (formerly 2C), magnesium-dependent, gamma isoform         | Protein serine/threonine phosphatase activity | Nucleoplasm                              | Serine/threonine phosphatase        | Cell communication;Signal transduction;Protein modification                            | PP2C;CC;PA2c      | Yes                      |  |
| CCDC58      | 131076  | coiled-coil domain-containing protein 58 isoform 1                                                                | NP_001017928.1    | 2          | 1                 | 1          | 1      | 1.39                                                     | 1.22                                                     |                                                                                        |                                                                                        |                                                                                               |                                                                                               | 1                                                                              | 1                                                                              | 18548   | 131076         | None                                                                             | Molecular function unknown                    | -                                        | Unclassified                        | Biological process unknown                                                             | -                 | Yes                      |  |
| SNW1        | 22938   | SNW domain-containing protein 1                                                                                   | NP_036377.1       | 1          | 10                | 10         | 19     | 1.39                                                     | 1.21                                                     | 1.65                                                                                   | 5.69                                                                                   | 8                                                                                             | 24.2                                                                                          | 12                                                                             | 12                                                                             | 4340    | 22938          | SKI interacting protein                                                          | Transcription regulator activity              | Nucleus                                  | Transcription regulatory protein    | Regulation of nucleobase, nucleoside, nucleotide and nucleic acid metabolism           | CC;NLS            | Yes                      |  |
| JPH2        | 57158   | junctionophilin-2 isoform 1                                                                                       | NP_065166.2       | 1          | 1                 | 1          | 1      | 1.39                                                     | 1.16                                                     |                                                                                        |                                                                                        |                                                                                               |                                                                                               | 1                                                                              | 1                                                                              | 12006   | 57158          | junctionophilin 2                                                                | Cell adhesion molecule activity               | Sarcoplasmic reticulum;Nucleus;Cytoplasm | Cell junction protein               | Cell growth and/or maintenance                                                         | MORN;TM           | Yes                      |  |
| BOD1L1      | 259282  | horizontalization of chromosomes in cell division protein 1-like 1                                                | NP_683692.2       | 2          | 3                 | 3          | 5      | 1.39                                                     | 0.93                                                     | 4.97                                                                                   | 48.87                                                                                  | 9.8                                                                                           | 71.1                                                                                          | 2                                                                              | 2                                                                              |         |                |                                                                                  |                                               |                                          |                                     |                                                                                        |                   |                          |  |
| BAK1        | 578     | bcl-2 homologous antagonist/killer                                                                                | NP_001179.1       | 1          | 4                 | 4          | 15     | 1.39                                                     | 0.86                                                     | 11.42                                                                                  | 11.74                                                                                  | 40.3                                                                                          | 22.9                                                                                          | 6                                                                              | 5                                                                              | 2744    | 578            | BCL2-antagonist killer 1                                                         | Receptor signaling complex scaffold activity  | Mitochondrion                            | Adapter molecule                    | Apoptosis                                                                              | TM;BH3;BHLH;B2    | Yes                      |  |
| RSL24D1     | 51187   | probable ribosome biogenesis protein RLP24                                                                        | NP_057388.1       | 1          | 2                 | 2          | 5      | 1.39                                                     | 0.82                                                     | 14.07                                                                                  | 35.43                                                                                  | 28.1                                                                                          | 42.7                                                                                          | 2                                                                              | 2                                                                              | 12665   | 51187          | chromosome 15 open reading frame 15                                              | Molecular function unknown                    | Ribosome                                 | Unclassified                        | Biological process unknown                                                             | TRASH             | Yes                      |  |
| TCF20       | 6942    | transcription factor 20 isoform 1                                                                                 | NP_005641.1       | 2          | 2                 | 2          | 4      | 1.39                                                     | 0.74                                                     | 0.84                                                                                   | 10.77                                                                                  | 1.6                                                                                           | 11.2                                                                                          | 2                                                                              | 2                                                                              | 4378    | 6942           | transcription factor 20 (AR1)                                                    | Transcription factor activity                 | Nucleus;Cytoplasm                        | Transcription factor                | Regulation of nucleobase, nucleoside, nucleotide and nucleic acid metabolism           | NLS;PHD           | Yes                      |  |
| ALB         | 213     | serum albumin preproprotein                                                                                       | NP_000468.1       | 1          | 3                 | 5          | 23     | 1.39                                                     | 0.52                                                     | 7.21                                                                                   | 15.46                                                                                  | 26.9                                                                                          | 21.5                                                                                          | 7                                                                              | 7                                                                              | 62      | 213            | albumin                                                                          | Transporter activity                          | Extracellular                            | Transport/cargo protein             | Transport                                                                              | Albumin;SP        | Yes                      |  |
| DLAT        | 1737    | dihydrolipoylysine-residue acetyltransferase component of pyruvate dehydrogenase complex, mitochondrial precursor | NP_001922.2       | 1          | 12                | 12         | 61     | 1.38                                                     | 1.64                                                     | 4.22                                                                                   | 4.22                                                                                   | 34.5                                                                                          | 40.7                                                                                          | 33                                                                             | 32                                                                             | 10578   | 1737           | dihydrolipoyl-S-acyltransferase (E2 component of pyruvate dehydrogenase complex) | Acyltransferase activity                      | Mitochondrion                            | Enzyme; Acyltransferase             | Metabolism;Energy pathways                                                             | -                 | Yes                      |  |
| CTNBL1      | 56259   | beta-catenin-like protein 1 isoform 1                                                                             | NP_110517.2       | 2          | 6                 | 6          | 9      | 1.38                                                     | 1.43                                                     | 13.33                                                                                  | 15.01                                                                                  | 43                                                                                            | 50.7                                                                                          | 5                                                                              | 5                                                                              | 10850   | 56259          | catenin, beta like 1                                                             | Molecular function unknown                    | Nucleus                                  | Unclassified                        | Apoptosis                                                                              | ARM               | Yes                      |  |
| PTGES       | 9536    | prostaglandin H synthase                                                                                          | NP_004869.1       | 1          | 2                 | 2          | 3      | 1.38                                                     | 1.38                                                     | 4.37                                                                                   | 14                                                                                     | 8.5                                                                                           | 27.8                                                                                          | 2                                                                              | 2                                                                              | 5528    | 9536           | prostaglandin H synthase                                                         | Molecular function unknown                    | Microsome                                | Enzyme; Synthase                    | Lipid metabolism                                                                       | TM                | Yes                      |  |
| DBNL        | 28988   | drebilin-like protein isoform a                                                                                   | NP_054782.2       | 3          | 1                 | 13         | 45     | 1.38                                                     | 1.17                                                     |                                                                                        |                                                                                        |                                                                                               |                                                                                               | 1                                                                              | 1                                                                              | 6588    | 28988          | drebilin-like                                                                    | Kinase regulator activity                     | Actin cytoskeleton                       | Adapter molecule                    | Signal transduction                                                                    | ADF;CC;SH3        | Yes                      |  |
| NEDD4L      | 23327   | E3 ubiquitin-protein ligase NEDD4-like isoform 7                                                                  | NP_001230889.1    | 7          | 4                 | 5          | 13     | 1.38                                                     | 1.17                                                     | 5.08                                                                                   | 10.84                                                                                  | 15.8                                                                                          | 28.9                                                                                          | 5                                                                              | 5                                                                              | 5903    | 23327          | neural precursor cell expressed, developmentally down-regulated 4-like           | Ubiquitin-specific protease activity          | Plasma membrane;Perinuclear region       | Ubiquitin proteasome system protein | Protein metabolism                                                                     | C2;WW;HECT        | No                       |  |
| RSF1        | 51773   | remodeling and spacing factor 1                                                                                   | NP_057662.3       | 1          | 5                 | 5          | 9      | 1.38                                                     | 1.1                                                      | 8.78                                                                                   | 1.29                                                                                   | 27.6                                                                                          | 3.2                                                                                           | 5                                                                              | 5                                                                              | 10537   | 51773          | hepatitis B virus x associated protein                                           | Transcription regulator activity              | Nucleus                                  | Transcription regulatory protein    | Regulation of nucleobase, nucleoside, nucleotide and nucleic acid metabolism           | PHD;CC;NLS        | Yes                      |  |
| CNOT3       | 4849    | CCR4-NOT transcription complex subunit 3                                                                          | NP_055331.1       | 1          | 2                 | 2          | 3      | 1.38                                                     | 1.07                                                     | 9.87                                                                                   | 2.82                                                                                   | 19.5                                                                                          | 4.3                                                                                           | 2                                                                              | 2                                                                              | 5368    | 4849           | CCR4-NOT transcription complex, subunit 3                                        | Transcription regulator activity              | Nucleus                                  | Transcription regulatory protein    | Regulation of nucleobase, nucleoside, nucleotide and nucleic acid metabolism           | CC                | Yes                      |  |
| SEC23B      | 10483   | protein transport protein Sec23B isoform 1                                                                        | NP_006354.2       | 2          | 9                 | 11         | 37     | 1.38                                                     | 1.06                                                     | 3.23                                                                                   | 8.73                                                                                   | 16.7                                                                                          | 35.8                                                                                          | 14                                                                             | 14                                                                             | 11543   | 10483          | Sec23 homolog B (S. cerevisiae)                                                  | Transporter activity                          | Endoplasmic reticulum                    | Transport/cargo protein             | Transport                                                                              | GEL               | Yes                      |  |
| COL4A1      | 1282    | collagen alpha-1(V) chain isoform 1 preproprotein                                                                 | NP_001836.3       | 1          | 1                 | 1          | 2      | 1.38                                                     | 0.99                                                     |                                                                                        |                                                                                        |                                                                                               |                                                                                               | 1                                                                              | 1                                                                              | 359     | 1282           | collagen, type IV, alpha 1                                                       | Extracellular matrix structural constituent   | Extracellular                            | Extracellular matrix protein        | Cell growth and/or maintenance                                                         | COLL;C4;SP        | Yes                      |  |
| TXNL1       | 9352    | thioredoxin-like protein 1                                                                                        | NP_004777.1       | 1          | 6                 | 6          | 15     | 1.38                                                     | 0.99                                                     | 8.43                                                                                   | 3.79                                                                                   | 33.7                                                                                          | 10.6                                                                                          | 8                                                                              | 8                                                                              | 4335    | 9352           | thioredoxin-like 1                                                               | Oxidoreductase activity                       | Cytoplasm                                | Enzyme; Oxidoreductase              | Metabolism;Energy pathways                                                             | -                 | Yes                      |  |
| RPS21       | 6227    | 40S ribosomal protein S21                                                                                         | NP_001015.1       | 1          | 1                 | 1          | 2      | 1.38                                                     | 0.93                                                     |                                                                                        |                                                                                        |                                                                                               |                                                                                               | 1                                                                              | 1                                                                              | 1605    | 6227           | ribosomal protein S21                                                            | Structural constituent of ribosome            | Ribosome                                 | Ribosomal subunit                   | Protein metabolism                                                                     | -                 | Yes                      |  |
| IGFBP7      | 3490    | insulin-like growth factor-binding protein 7 isoform 1 precursor                                                  | NP_001544.1       | 3          | 8                 | 8          | 13     | 1.38                                                     | 0.92                                                     | 16.38                                                                                  | 7.45                                                                                   | 60                                                                                            | 17                                                                                            | 6                                                                              | 6                                                                              | 4183    | 3490           | insulin-like growth factor binding protein 7                                     | Cell adhesion molecule activity               | Extracellular                            | Adhesion molecule                   | Cell communication;Signal transduction                                                 | SP;IB;KAZAL;IG    | Yes                      |  |
| CCZ1B       | 221960  | vacuolar fusion protein CCZ1 homolog B                                                                            | NP_932765.1       | 1          | 3                 | 3          | 3      | 1.38                                                     | 0.92                                                     | 2.05                                                                                   | 22.07                                                                                  | 4                                                                                             | 29.3                                                                                          | 2                                                                              | 2                                                                              |         |                |                                                                                  |                                               |                                          |                                     |                                                                                        |                   |                          |  |
| PEG10       | 23089   | retrotransposon-derived protein PEG10 isoform 3                                                                   | NP_001165908.1    | 6          | 1                 | 1          | 3      | 1.38                                                     | 0.71                                                     |                                                                                        |                                                                                        |                                                                                               |                                                                                               | 1                                                                              | 1                                                                              | 15117   | 23089          | paternally expressed 10                                                          | Protein binding                               | Nucleus                                  | Cell cycle control protein          | Apoptosis                                                                              | CC;ZNF2;ZNF;C;CHC | No                       |  |
| SH3KBP1     | 30011   | SH3 domain-containing kinase-binding protein 1 isoform a                                                          | NP_114098.1       | 3          | 14                | 14         | 35     | 1.37                                                     | 1.37                                                     | 6.08                                                                                   | 5.24                                                                                   | 36.4                                                                                          | 31.3                                                                                          | 18                                                                             | 18                                                                             | 2301    | 30011          | SH3-domain kinase binding protein 1                                              | Receptor signaling complex scaffold activity  | Cytoplasm                                | Adapter molecule                    | Cell communication;Signal transduction;Regulation of signal transduction;Cell adhesion | SH3;CC            | Yes                      |  |
| RABAC1      | 10567   | prenylated Rab acceptor protein 1                                                                                 | NP_006414.2       | 1          | 1                 | 1          | 2      | 1.37                                                     | 1.37                                                     |                                                                                        |                                                                                        |                                                                                               |                                                                                               | 1                                                                              | 1                                                                              | 5375    | 10567          | Rab acceptor 1 (prenylated)                                                      | GTPase activator activity                     | Golgi apparatus                          | GTPase activating protein           | Transport                                                                              | TM                | No                       |  |
| ALG2        | 85365   | alpha-1,3/1,6-mannosyltransferase ALG2                                                                            | NP_149078.1       | 1          | 4                 | 4          | 7      | 1.37                                                     | 1.26                                                     | 6.13                                                                                   | 9.73                                                                                   | 16.9                                                                                          | 25                                                                                            | 4                                                                              | 4                                                                              | 9716    | 85365          | asparagine-linked glycosylation 2 homolog (yeast, alpha-1,3-mannosyltransferase) | Mannosyltransferase activity                  | Endoplasmic reticulum                    | Enzyme; Mannosyltransferase         | Metabolism;Energy pathways                                                             | TM                | Yes                      |  |
| NOB1        | 28987   | RNA-binding protein NOB1                                                                                          | NP_054781.1       | 1          | 4                 | 4          | 8      | 1.37                                                     | 1.19                                                     | 4.02                                                                                   | 5.21                                                                                   | 11.1                                                                                          | 12.5                                                                                          | 4                                                                              | 4                                                                              | 11395   | 28987          | None                                                                             | Ribonuclease activity                         | -                                        | Ribonuclease                        | Regulation of nucleobase, nucleoside, nucleotide and nucleic acid metabolism           | PNc               | No                       |  |

Supplementary Table S1. List of quantified proteins in OKF6/TERT1-Smoke cells  
 Raigopalnan *et al.*, 2017. Role of protein kinase N2 (PKN2) in cigarette smoke-mediated oncogenic transformation of oral cells

| Gene Symbol | Gene ID | Protein Description                                                  | Protein Accession | # Proteins | # Unique Peptides | # Peptides | # PSMs | OKF6/TERT1-Smoke/<br>OKF6/TERT1-Parental<br>(130/126) R1 | OKF6/TERT1-Smoke/<br>OKF6/TERT1-Parental<br>(128/127) R2 | Ratio Standard Errors [%]:<br>OKF6/TERT1-Smoke/<br>OKF6/TERT1-Parental<br>(130/126) R1 | Ratio Standard Errors [%]:<br>OKF6/TERT1-Smoke/<br>OKF6/TERT1-Parental<br>(128/127) R2 | Ratio Variabilities [%]:<br>F13: OKF6/TERT1-<br>Smoke/<br>OKF6/TERT1-Parental<br>(130/126) R1 | Ratio Variabilities [%]:<br>F13: OKF6/TERT1-<br>Smoke/<br>OKF6/TERT1-Parental<br>(128/127) R2 | Ratio Counts: F13:<br>OKF6/TERT1-Smoke/<br>OKF6/TERT1-Parental<br>(130/126) R1 | Ratio Counts: F13:<br>OKF6/TERT1-Smoke/<br>OKF6/TERT1-Parental<br>(128/127) R2 | HPRD ID | Entrez Gene ID | Gene Name                                                                 | Molecular Function                                        | Primary Localization           | Molecular Class                            | Biological Process                                               | Domains              | Plasma Proteome Database |
|-------------|---------|----------------------------------------------------------------------|-------------------|------------|-------------------|------------|--------|----------------------------------------------------------|----------------------------------------------------------|----------------------------------------------------------------------------------------|----------------------------------------------------------------------------------------|-----------------------------------------------------------------------------------------------|-----------------------------------------------------------------------------------------------|--------------------------------------------------------------------------------|--------------------------------------------------------------------------------|---------|----------------|---------------------------------------------------------------------------|-----------------------------------------------------------|--------------------------------|--------------------------------------------|------------------------------------------------------------------|----------------------|--------------------------|
| ZNF598      | 90850   | zinc finger protein 598                                              | NP_835461.2       | 1          | 5                 | 6          | 12     | 1.37                                                     | 1.19                                                     | 6.27                                                                                   | 4.25                                                                                   | 17.3                                                                                          | 10.1                                                                                          | 4                                                                              | 4                                                                              | 11732   | 90850          | zinc finger protein 598                                                   | DNA binding                                               | Nucleus                        | DNA binding protein                        | Regulation of nucleobase, nucleotide and nucleic acid metabolism | RING                 | No                       |
| INPPL1      | 3636    | phosphatidylinositol 3,4,5-trisphosphate 5-phosphatase 2             | NP_001558.3       | 1          | 1                 | 1          | 2      | 1.37                                                     | 1.14                                                     |                                                                                        |                                                                                        |                                                                                               |                                                                                               | 1                                                                              | 1                                                                              | 2900    | 3636           | inositol polyphosphate phosphatase-like 1                                 | Lipid phosphatase activity                                | Cytoplasm                      | Lipid phosphatase                          | Cell communication;Signal transduction                           | SH2,1_PhosphataseSAM | No                       |
| PEX5        | 5830    | peroxisomal biogenesis factor 5 isoform e                            | NP_001287718.1    | 5          | 1                 | 1          | 1      | 1.37                                                     | 0.96                                                     |                                                                                        |                                                                                        |                                                                                               |                                                                                               | 1                                                                              | 1                                                                              | 2684    | 5830           | peroxisomal biogenesis factor 5                                           | Protein binding                                           | Cytoplasm                      | Integral membrane protein                  | Cell communication;Signal transduction                           | TPR                  | Yes                      |
| PLTP        | 5360    | phospholipid transfer protein isoform a precursor                    | NP_006218.1       | 4          | 5                 | 5          | 7      | 1.37                                                     | 0.92                                                     | 21.18                                                                                  | 38.58                                                                                  | 53.4                                                                                          | 67.5                                                                                          | 3                                                                              | 3                                                                              | 1399    | 5360           | phospholipid transfer protein                                             | Transporter activity                                      | Extracellular                  | Transport/cargo protein                    | Transport                                                        | SP                   | Yes                      |
| EEFSEC      | 60678   | selenocysteine-specific elongation factor                            | NP_068756.2       | 1          | 3                 | 3          | 5      | 1.37                                                     | 0.81                                                     | 18.14                                                                                  | 27.57                                                                                  | 45                                                                                            | 40.2                                                                                          | 3                                                                              | 3                                                                              | 7409    | 60678          | eukaryotic elongation factor;selenocysteine-tRNA-specific                 | Translation regulator activity                            | Cytoplasm                      | Translation regulator protein              | Protein metabolism                                               | GTP_EFTU_D2          | Yes                      |
| FAM98B      | 283742  | protein FAM98B                                                       | NP_775882.2       | 1          | 5                 | 5          | 12     | 1.37                                                     | 0.79                                                     | 0.36                                                                                   | 16.02                                                                                  | 1.3                                                                                           | 34.4                                                                                          | 7                                                                              | 7                                                                              | 8786    | 283742         | None                                                                      | Molecular function unknown                                | -                              | Unclassified                               | Biological_process unknown                                       | -                    | Yes                      |
| ANKRD34A    | 284615  | ankyrin repeat domain-containing protein 34A                         | NP_001034977.1    | 1          | 1                 | 1          | 1      | 1.37                                                     | 0.76                                                     |                                                                                        |                                                                                        |                                                                                               |                                                                                               | 1                                                                              | 1                                                                              | 19079   | 284615         | ankyrin repeat domain 34                                                  | Molecular function unknown                                | -                              | Unclassified                               | Biological_process unknown                                       | ANK                  | No                       |
| TOMM5       | 401505  | mitochondrial import receptor subunit TOM5 homolog isoform 3         | NP_001127956.1    | 3          | 1                 | 1          | 1      | 1.37                                                     | 0.74                                                     |                                                                                        |                                                                                        |                                                                                               |                                                                                               | 1                                                                              | 1                                                                              | 16672   | 401505         | chromosome 9 open reading frame 105                                       | Molecular function unknown                                | -                              | Unclassified                               | Biological_process unknown                                       | -                    | No                       |
| CARHSP1     | 23589   | calcium-regulated heat stable protein 1                              | NP_055131.2       | 1          | 1                 | 1          | 4      | 1.37                                                     | 0.66                                                     | 8.33                                                                                   | 12.48                                                                                  | 16.3                                                                                          | 11.8                                                                                          | 2                                                                              | 2                                                                              | 8515    | 23589          | calcium regulated heat stable protein 1,24kDa                             | Calcium ion binding                                       | Cytoplasm                      | Calcium binding protein                    | Cell communication;Signal transduction                           | CSP                  | Yes                      |
| PLEKHM1     | 9842    | pleckstrin homology domain-containing family M member 1              | NP_055613.1       | 1          | 1                 | 1          | 2      | 1.36                                                     | 1.86                                                     |                                                                                        |                                                                                        |                                                                                               |                                                                                               | 1                                                                              | 1                                                                              | 11439   | 9842           | pleckstrin homology domain containing family M (with RUN domain) member 1 | Receptor signaling complex scaffold activity              | Cytoplasm                      | Adapter molecule                           | Cell communication;Signal transduction                           | PH,C1                | No                       |
| NOSIP       | 51070   | nitric oxide synthase-interacting protein                            | NP_057037.1       | 1          | 4                 | 4          | 6      | 1.36                                                     | 1.72                                                     | 2.04                                                                                   | 13.2                                                                                   | 5.5                                                                                           | 47.9                                                                                          | 4                                                                              | 4                                                                              | 17642   | 51070          | nitric oxide synthase interacting protein                                 | Transporter activity                                      | Cytoplasmic vesicle            | Transport/cargo protein                    | Transport                                                        | CC                   | No                       |
| C11orf58    | 10944   | small acidic protein                                                 | NP_055082.1       | 1          | 3                 | 3          | 27     | 1.36                                                     | 1.4                                                      | 14                                                                                     | 14.61                                                                                  | 69.8                                                                                          | 76.1                                                                                          | 11                                                                             | 11                                                                             | 18069   | 10944          | None                                                                      | Molecular function unknown                                | -                              | Unclassified                               | Biological_process unknown                                       | -                    | No                       |
| ACOT8       | 10005   | acyl-coenzyme A thioesterase 8                                       | NP_005460.2       | 1          | 2                 | 2          | 7      | 1.36                                                     | 1.38                                                     | 6.8                                                                                    | 0.83                                                                                   | 18.6                                                                                          | 2.3                                                                                           | 4                                                                              | 4                                                                              | 6998    | 10005          | peroxisomal acyl-CoA thioesterase                                         | Hydrolase activity                                        | Peroxisomal matrix             | Enzyme;Thioesterase                        | Lipid metabolism                                                 | -                    | Yes                      |
| MRI1        | 84245   | methylthioribose-1-phosphate isomerase isoform 1                     | NP_001026897.1    | 2          | 3                 | 3          | 9      | 1.36                                                     | 1.3                                                      | 6.72                                                                                   | 7.16                                                                                   | 18.4                                                                                          | 18.7                                                                                          | 4                                                                              | 4                                                                              | 14548   | 84245          | None                                                                      | Translation regulator activity;Molecular function unknown | -                              | Translation regulator protein;Unclassified | Protein metabolism;Biological process unknown                    | -                    | No                       |
| HMG20A      | 10363   | high mobility group protein 20A isoform a                            | NP_060670.1       | 2          | 3                 | 3          | 7      | 1.36                                                     | 1.3                                                      | 8.11                                                                                   | 6.56                                                                                   | 19.3                                                                                          | 14.9                                                                                          | 3                                                                              | 3                                                                              | 16116   | 10363          | high-mobility group 20A                                                   | Transcription regulator activity                          | Nucleus                        | Transcription regulator protein            | Regulation of nucleobase, nucleotide and nucleic acid metabolism | HMG;CC               | No                       |
| FAM207A     | 85395   | protein FAM207A                                                      | NP_478070.1       | 1          | 1                 | 1          | 2      | 1.36                                                     | 1.3                                                      |                                                                                        |                                                                                        |                                                                                               |                                                                                               | 1                                                                              | 1                                                                              |         |                |                                                                           |                                                           |                                |                                            |                                                                  |                      |                          |
| SUGP1       | 57794   | SURP and G-patch domain-containing protein 1                         | NP_757386.2       | 1          | 3                 | 3          | 4      | 1.36                                                     | 1.28                                                     | 5.06                                                                                   | 3.76                                                                                   | 12                                                                                            | 8.3                                                                                           | 3                                                                              | 3                                                                              |         |                |                                                                           |                                                           |                                |                                            |                                                                  |                      |                          |
| GOLGA2      | 2801    | Golgin subfamily A member 2                                          | NP_004477.3       | 1          | 16                | 16         | 38     | 1.36                                                     | 1.28                                                     | 2.22                                                                                   | 6.11                                                                                   | 12.9                                                                                          | 34.1                                                                                          | 18                                                                             | 18                                                                             | 3989    | 2801           | golgi autoantigen; golgin subfamily a, 2                                  | Structural molecule activity                              | Golgi apparatus;Golgi membrane | Structural protein                         | Cell growth and/or maintenance                                   | CC                   | Yes                      |
| GDA         | 9615    | guanine deaminase isoform a                                          | NP_001229434.1    | 1          | 1                 | 18         | 47     | 1.36                                                     | 1.27                                                     |                                                                                        |                                                                                        |                                                                                               |                                                                                               | 1                                                                              | 1                                                                              | 8849    | 9615           | guanine deaminase                                                         | Deaminase activity                                        | Cytoplasm                      | Enzyme;Deaminase                           | Metabolism;Energy pathways                                       | -                    | Yes                      |
| SRM         | 6723    | spermidine synthase                                                  | NP_003123.2       | 1          | 7                 | 7          | 19     | 1.36                                                     | 1.22                                                     | 5.78                                                                                   | 14.72                                                                                  | 24                                                                                            | 58.2                                                                                          | 9                                                                              | 9                                                                              | 1692    | 6723           | spermidine synthase                                                       | Transferase activity;Methyltransferase activity           | Cytoplasm                      | Enzyme;Synthase                            | Metabolism;Energy pathways                                       | -                    | Yes                      |
| RALGAP1     | 253959  | ral GTPase-activating protein subunit alpha-1 isoform 2              | NP_919277.2       | 4          | 2                 | 2          | 3      | 1.36                                                     | 1.22                                                     | 0.39                                                                                   | 0.19                                                                                   | 0.7                                                                                           | 0.3                                                                                           | 2                                                                              | 2                                                                              | 12324   | 253959         | GTPase activating Rap/Rang/GAP domain-like 1                              | GTPase activator activity                                 | Nucleus;Cytoplasm              | GTPase activating protein                  | Signal transduction                                              | TM;CC;LZ             | Yes                      |
| MAP2K3      | 5606    | dual specificity mitogen-activated protein kinase kinase 3 isoform B | NP_659731.1       | 4          | 6                 | 6          | 11     | 1.36                                                     | 1.06                                                     | 6.07                                                                                   | 6.98                                                                                   | 22.1                                                                                          | 19.8                                                                                          | 7                                                                              | 7                                                                              | 3816    | 5606           | mitogen-activated protein kinase kinase 3                                 | Protein serine/threonine kinase activity                  | Nucleus                        | Serine/threonine kinase                    | Signal transduction                                              | S_T_kinase           | Yes                      |
| TBC1D10A    | 83874   | TBC1 domain family member 10A isoform 1                              | NP_001191169.1    | 2          | 1                 | 1          | 2      | 1.36                                                     | 1.02                                                     |                                                                                        |                                                                                        |                                                                                               |                                                                                               | 1                                                                              | 1                                                                              | 18162   | 83874          | TBC1 domain family, member 10A                                            | GTPase activator activity                                 | -                              | GTase activating protein                   | Cell communication;Signal transduction                           | TBC                  | Yes                      |
| USP19       | 10869   | ubiquitin carboxyl-terminal hydrolase 19 isoform 1                   | NP_001186089.1    | 4          | 3                 | 3          | 5      | 1.36                                                     | 1.01                                                     | 20.36                                                                                  | 2.94                                                                                   | 50.8                                                                                          | 5.1                                                                                           | 3                                                                              | 3                                                                              | 18278   | 10869          | ubiquitin specific protease 19                                            | Ubiquitin-specific protease activity                      | -                              | Ubiquitin proteasome system protein        | Protein metabolism                                               | TM;UCH               | Yes                      |
| PREPL       | 9581    | prolyl endopeptidase-like isoform 1                                  | NP_006027.2       | 3          | 1                 | 1          | 2      | 1.36                                                     | 0.94                                                     |                                                                                        |                                                                                        |                                                                                               |                                                                                               | 1                                                                              | 1                                                                              | 17189   | 9581           | prolyl endopeptidase-like N                                               | Serine-type peptidase activity                            | -                              | Serine protease                            | Protein metabolism                                               | -                    | No                       |
| NAGA        | 4668    | alpha-N-acetylgalactosaminidase precursor                            | NP_000253.1       | 1          | 1                 | 1          | 1      | 1.36                                                     | 0.92                                                     |                                                                                        |                                                                                        |                                                                                               |                                                                                               | 1                                                                              | 1                                                                              | 76      | 4668           | acetyl-galactosaminidase, alpha-                                          | Catalytic activity                                        | Lysosome                       | Enzyme;Glycosidase                         | Metabolism;Energy pathways                                       | SP                   | Yes                      |
| AGPAT9      | 84803   | glycerol-3-phosphate acyltransferase 3                               | NP_116106.2       | 1          | 1                 | 1          | 1      | 1.36                                                     | 0.89                                                     |                                                                                        |                                                                                        |                                                                                               |                                                                                               | 1                                                                              | 1                                                                              | 14417   | 84803          | None                                                                      | Acyltransferase activity                                  | Endoplasmic reticulum          | Enzyme;Acyltransferase                     | Lipid metabolism;Energy pathways                                 | TM;PISC              | No                       |
| MPHOSPH10   | 10199   | U3 small nucleolar ribonucleoprotein protein MPP10                   | NP_005782.1       | 1          | 9                 | 9          | 18     | 1.36                                                     | 0.89                                                     | 3.4                                                                                    | 5.15                                                                                   | 15.4                                                                                          | 15.2                                                                                          | 11                                                                             | 11                                                                             | 10404   | 10199          | M-phase phosphoprotein 10 (U3 small nucleolar ribonucleoprotein)          | Ribonucleoprotein                                         | Nucleolus                      | RNA binding protein                        | Regulation of nucleobase, nucleotide and nucleic acid metabolism | CC;NLS               | Yes                      |
| MAP7D3      | 79649   | MAP7 domain-containing protein 3 isoform 1                           | NP_078873.2       | 3          | 1                 | 1          | 1      | 1.36                                                     | 0.77                                                     |                                                                                        |                                                                                        |                                                                                               |                                                                                               | 1                                                                              | 1                                                                              | 9953    | 79649          | None                                                                      | Molecular function unknown                                | -                              | Unclassified                               | Biological_process unknown                                       | CC                   | No                       |



Supplementary Table S1. List of quantified proteins in OKF6/TERT1-Smoke cells  
 Raingopaln *et al.*, 2017. Role of protein kinase N2 (PKN2) in cigarette smoke-mediated oncogenic transformation of oral cells

| Gene Symbol | Gene ID | Protein Description                                                                      | Protein Accession | # Proteins | # Unique Peptides | # Peptides | # PSMs | OKF6/TERT1-Smoke/<br>OKF6/TERT1-Parental<br>(130/126) R1 | OKF6/TERT1-Smoke/<br>OKF6/TERT1-Parental<br>(128/127) R2 | Ratio Standard Errors [%]:<br>OKF6/TERT1-Smoke/<br>OKF6/TERT1-Parental<br>(130/126) R1 | Ratio Standard Errors [%]:<br>OKF6/TERT1-Smoke/<br>OKF6/TERT1-Parental<br>(128/127) R2 | Ratio Variabilities [%]:<br>F13: OKF6/TERT1-<br>Smoke/<br>OKF6/TERT1-Parental<br>(130/126) R1 | Ratio Variabilities [%]:<br>F13: OKF6/TERT1-<br>Smoke/<br>OKF6/TERT1-Parental<br>(128/127) R2 | Ratio Counts: F13:<br>OKF6/TERT1-Smoke/<br>OKF6/TERT1-Parental<br>(130/126) R1 | Ratio Counts: F13:<br>OKF6/TERT1-Smoke/<br>OKF6/TERT1-Parental<br>(128/127) R2 | HPRD ID | Entrez Gene Id | Gene Name                                                   | Molecular Function                           | Primary Localization | Molecular Class                         | Biological Process                                               | Domains              | Plasma Proteome Database |
|-------------|---------|------------------------------------------------------------------------------------------|-------------------|------------|-------------------|------------|--------|----------------------------------------------------------|----------------------------------------------------------|----------------------------------------------------------------------------------------|----------------------------------------------------------------------------------------|-----------------------------------------------------------------------------------------------|-----------------------------------------------------------------------------------------------|--------------------------------------------------------------------------------|--------------------------------------------------------------------------------|---------|----------------|-------------------------------------------------------------|----------------------------------------------|----------------------|-----------------------------------------|------------------------------------------------------------------|----------------------|--------------------------|
| PHF14       | 9678    | PHD finger protein 14                                                                    | NP_055475.2       | 1          | 3                 | 3          | 5      | 1.34                                                     | 1.02                                                     | 0.03                                                                                   | 6.33                                                                                   | 0.1                                                                                           | 11.3                                                                                          | 3                                                                              | 3                                                                              | 17845   | 9678           | PHD finger protein 14                                       | Molecular function unknown                   | Nucleus/Cytoplasm    | Unclassified                            | Biological process unknown                                       | CC;PHD               | Yes                      |
| TPP1        | 1200    | tripeptidyl-peptidase 1 preproprotein                                                    | NP_000382.3       | 1          | 4                 | 4          | 14     | 1.34                                                     | 1.01                                                     | 5.35                                                                                   | 15.55                                                                                  | 19.2                                                                                          | 43.2                                                                                          | 7                                                                              | 7                                                                              | 6415    | 1200           | tripeptidyl-peptidase 1                                     | Serine-type peptidase activity               | Lysosome             | Serine protease                         | Protein metabolism                                               | SP                   | Yes                      |
| NUCB1       | 4924    | nucleobindin-1 precursor                                                                 | NP_006175.2       | 1          | 15                | 15         | 40     | 1.34                                                     | 1.01                                                     | 2.91                                                                                   | 7.62                                                                                   | 19.6                                                                                          | 38.9                                                                                          | 25                                                                             | 24                                                                             | 3205    | 4924           | nucleobindin 1                                              | Calcium ion binding                          | Golgi apparatus      | Calcium binding protein                 | Cell communication;Signal transduction                           | SP;CC;EF             | Yes                      |
| IFT5        | 24138   | interferon-induced protein with tetratricopeptide repeats 5                              | NP_036552.1       | 1          | 3                 | 3          | 7      | 1.34                                                     | 0.94                                                     | 1.47                                                                                   | 28.87                                                                                  | 2.8                                                                                           | 40                                                                                            | 2                                                                              | 2                                                                              | 17130   | 24138          | interferon-induced protein with tetratricopeptide repeats 5 | Molecular function unknown                   | -                    | Unclassified                            | Biological process unknown                                       | TPR                  | No                       |
| NDUFAF3     | 25915   | NADH dehydrogenase [ubiquinone] 1 alpha subcomplex assembly factor 3 isoform a precursor | NP_951032.1       | 2          | 1                 | 1          | 8      | 1.34                                                     | 0.91                                                     | 2.33                                                                                   | 21.8                                                                                   | 6.2                                                                                           | 41.2                                                                                          | 4                                                                              | 4                                                                              | 16809   | 25915          | None                                                        | Molecular function unknown                   | -                    | Unclassified                            | Biological process unknown                                       | -                    | No                       |
| TSPYL1      | 7259    | testis-specific Y-encoded-like protein 1                                                 | NP_003300.1       | 1          | 3                 | 3          | 4      | 1.34                                                     | 0.86                                                     | 5.71                                                                                   | 27.59                                                                                  | 10.8                                                                                          | 34.5                                                                                          | 2                                                                              | 2                                                                              | 5278    | 7259           | TSPY-like 1                                                 | Molecular function unknown                   | Nucleus              | Unclassified                            | Biological process unknown                                       | -                    | Yes                      |
| RANBP1      | 5902    | ran-specific GTPase-activating protein isoform 1                                         | NP_001265568.1    | 4          | 6                 | 6          | 32     | 1.34                                                     | 0.83                                                     | 3                                                                                      | 7.26                                                                                   | 17.2                                                                                          | 25.8                                                                                          | 18                                                                             | 18                                                                             | 3110    | 5902           | RAN binding protein 1                                       | Transporter activity                         | Cytoplasm            | Transport/cargo protein                 | Cell communication;Signal transduction                           | CC                   | Yes                      |
| CCT6A       | 908     | T-complex protein 1 subunit zeta isoform a                                               | NP_001753.1       | 5          | 15                | 15         | 157    | 1.34                                                     | 0.82                                                     | 4.48                                                                                   | 5.6                                                                                    | 59.2                                                                                          | 44                                                                                            | 83                                                                             | 83                                                                             | 89      | 908            | chaperonin containing TCP1, subunit 6A (zeta 1)             | Chaperone activity                           | Cytoplasm            | Chaperone                               | Protein metabolism                                               | -                    | Yes                      |
| RNF113A     | 7737    | RING finger protein 113A                                                                 | NP_008909.1       | 1          | 2                 | 2          | 3      | 1.34                                                     | 0.75                                                     |                                                                                        |                                                                                        |                                                                                               |                                                                                               | 1                                                                              | 1                                                                              | 6760    | 7737           | ring finger protein 113A                                    | DNA binding                                  | Nucleus              | DNA binding protein                     | Regulation of nucleobase, nucleoside and nucleic acid metabolism | RING;ZnF_C3HI        | No                       |
| NCKAP1L     | 3071    | nck-associated protein 1-like isoform 1                                                  | NP_005328.2       | 2          | 1                 | 1          | 2      | 1.34                                                     | 0.54                                                     |                                                                                        |                                                                                        |                                                                                               |                                                                                               | 1                                                                              | 1                                                                              | 781     | 3071           | hematopoietic protein 1                                     | Molecular function unknown                   | Plasma membrane      | Integral membrane protein               | Biological process unknown                                       | -                    | Yes                      |
| NAP1L1      | 4673    | nucleosome assembly protein 1-like 1 isoform 1                                           | NP_631946.1       | 2          | 9                 | 11         | 108    | 1.33                                                     | 1.65                                                     | 6.41                                                                                   | 5.41                                                                                   | 60.7                                                                                          | 63.1                                                                                          | 43                                                                             | 42                                                                             | 1248    | 4673           | nucleosome assembly protein 1 like 1                        | DNA binding                                  | Nucleus              | Transcription regulatory protein        | Regulation of nucleobase, nucleoside and nucleic acid metabolism | CC;NLS               | Yes                      |
| EP8L2       | 64787   | epidermal growth factor receptor kinase substrate 8-like protein 2                       | NP_073609.2       | 1          | 13                | 13         | 53     | 1.33                                                     | 1.52                                                     | 4.53                                                                                   | 6.46                                                                                   | 32.1                                                                                          | 53.4                                                                                          | 27                                                                             | 26                                                                             | 10940   | 64787          | EP8-like 2                                                  | Receptor signaling complex scaffold activity | -                    | Adapter molecule                        | Cell communication;Signal transduction                           | SH3;PTB              | No                       |
| CLPB        | 81570   | caseinolytic peptidase B protein homolog isoform 1                                       | NP_110440.1       | 4          | 6                 | 6          | 10     | 1.33                                                     | 1.46                                                     | 3.11                                                                                   | 12.94                                                                                  | 10.2                                                                                          | 48.7                                                                                          | 6                                                                              | 6                                                                              | 11560   | 81570          | None                                                        | ATPase activity                              | Nucleus              | ATPase                                  | Metabolism;Energy pathways                                       | SP;ANK;CC;AA         | Yes                      |
| RPS24       | 6229    | 40S ribosomal protein S24 isoform d                                                      | NP_001135757.1    | 5          | 5                 | 5          | 44     | 1.33                                                     | 1.43                                                     | 5.07                                                                                   | 12.11                                                                                  | 36.9                                                                                          | 115.1                                                                                         | 28                                                                             | 28                                                                             | 3877    | 6229           | ribosomal protein S24                                       | Structural constituent of ribosome           | Ribosome             | Ribosomal subunit                       | Protein metabolism                                               | NLS                  | Yes                      |
| PLAUR       | 5329    | urokinase plasminogen activator surface receptor isoform 1 precursor                     | NP_002650.1       | 4          | 2                 | 2          | 3      | 1.33                                                     | 1.42                                                     | 6.12                                                                                   | 2.37                                                                                   | 11.5                                                                                          | 4.8                                                                                           | 2                                                                              | 2                                                                              | 1421    | 5329           | plasminogen activator, urokinase receptor                   | Receptor activity                            | Plasma membrane      | Cell surface receptor                   | Cell communication;Signal transduction                           | SP;LU;GPI            | No                       |
| ARCN1       | 372     | coatomer subunit delta isoform 1                                                         | NP_001646.2       | 2          | 21                | 21         | 73     | 1.33                                                     | 1.38                                                     | 3.17                                                                                   | 4.82                                                                                   | 27.5                                                                                          | 44.4                                                                                          | 41                                                                             | 41                                                                             | 2893    | 372            | archain 1                                                   | Transporter activity                         | Cytoplasm            | Transport/cargo protein                 | Transport                                                        | CC                   | Yes                      |
| PALM2-AKAP2 | 445815  | PALM2-AKAP2 protein isoform 2                                                            | NP_671492.1       | 5          | 22                | 23         | 65     | 1.33                                                     | 1.33                                                     | 4.06                                                                                   | 5.39                                                                                   | 32.4                                                                                          | 44.3                                                                                          | 34                                                                             | 35                                                                             | 18661   | 445815         | None                                                        | Molecular function unknown                   | Plasma membrane      | Unclassified                            | Biological process unknown                                       | C-C                  | Yes                      |
| MCC         | 4163    | colorectal mutant cancer protein isoform 1                                               | NP_001078846.1    | 2          | 9                 | 9          | 20     | 1.33                                                     | 1.31                                                     | 7.11                                                                                   | 10.52                                                                                  | 32.2                                                                                          | 48.1                                                                                          | 11                                                                             | 11                                                                             | 1157    | 4163           | mutated in colorectal cancers                               | Molecular function unknown                   | Cytoplasm            | Unclassified;Cell cycle control protein | Cell communication;Signal transduction                           | CC;EF                | Yes                      |
| PGD         | 5226    | 6-phosphogluconate dehydrogenase, decarboxylating isoform 1                              | NP_002622.2       | 3          | 20                | 20         | 107    | 1.33                                                     | 1.31                                                     | 3.38                                                                                   | 4.67                                                                                   | 34.4                                                                                          | 48                                                                                            | 55                                                                             | 55                                                                             | 1391    | 5226           | phosphogluconate dehydrogenase                              | Catalytic activity                           | Cytoplasm            | Enzyme: Dehydrogenase                   | Metabolism;Energy pathways                                       | -                    | Yes                      |
| FAM50A      | 9130    | protein FAM50A                                                                           | NP_004690.1       | 2          | 5                 | 5          | 7      | 1.33                                                     | 1.26                                                     | 14.33                                                                                  | 15                                                                                     | 44.5                                                                                          | 44.1                                                                                          | 5                                                                              | 5                                                                              | 2349    | 9130           | family with sequence similarity 50, member A                | DNA binding                                  | Nucleus              | DNA binding protein                     | Regulation of nucleobase, nucleoside and nucleic acid metabolism | CC                   | Yes                      |
| NELFE       | 7936    | negative elongation factor E                                                             | NP_002895.3       | 1          | 7                 | 7          | 20     | 1.33                                                     | 1.18                                                     | 2.31                                                                                   | 9.94                                                                                   | 8.7                                                                                           | 34.3                                                                                          | 8                                                                              | 8                                                                              |         |                |                                                             |                                              |                      |                                         |                                                                  |                      |                          |
| DNAJC21     | 134218  | dnaj homolog subfamily C member 21 isoform 1                                             | NP_919259.3       | 2          | 1                 | 1          | 2      | 1.33                                                     | 1.17                                                     |                                                                                        |                                                                                        |                                                                                               |                                                                                               | 1                                                                              | 1                                                                              | 14056   | 134218         | None                                                        | DNA binding                                  | -                    | DNA binding protein                     | Regulation of nucleobase, nucleoside and nucleic acid metabolism | CC;DNAJ;ZNF2         | No                       |
| ADRBK1      | 156     | beta-adrenergic receptor kinase 1                                                        | NP_001610.2       | 2          | 3                 | 3          | 5      | 1.33                                                     | 1.13                                                     | 5.92                                                                                   | 12.92                                                                                  | 11.2                                                                                          | 20.8                                                                                          | 2                                                                              | 2                                                                              | 182     | 156            | adrenergic, beta, receptor kinase 1                         | Protein serine/threonine kinase activity     | Cytoplasm            | Serine/threonine kinase                 | Cell communication;Signal transduction                           | RGS;S_T_kinase;PH;CC | Yes                      |
| DBR1        | 51163   | lariat debranching enzyme                                                                | NP_057300.2       | 1          | 3                 | 3          | 4      | 1.33                                                     | 1.12                                                     | 29.74                                                                                  | 16.61                                                                                  | 60.7                                                                                          | 26.8                                                                                          | 2                                                                              | 2                                                                              | 7384    | 51163          | debranching enzyme homolog 1 (S. cerevisiae)                | Hydrolase activity                           | Nucleus              | Enzyme: Hydrolase                       | Regulation of nucleobase, nucleoside and nucleic acid metabolism | -                    | No                       |
| GPR107      | 57720   | protein GPR107 isoform 1 precursor                                                       | NP_001130029.1    | 4          | 2                 | 2          | 4      | 1.33                                                     | 1.07                                                     | 11.83                                                                                  | 20.14                                                                                  | 22.6                                                                                          | 31.2                                                                                          | 2                                                                              | 2                                                                              | 17054   | 57720          | G protein-coupled receptor 107                              | G-protein coupled receptor activity          | Plasma membrane      | G protein coupled receptor              | Cell communication;Signal transduction                           | SP;TM                | No                       |
| CD3EAP      | 10849   | DNA-directed RNA polymerase I subunit RPA34 isoform 1                                    | NP_001284519.1    | 2          | 8                 | 8          | 27     | 1.33                                                     | 1.07                                                     | 2.12                                                                                   | 6.05                                                                                   | 8.9                                                                                           | 20.7                                                                                          | 10                                                                             | 10                                                                             | 125     | 10849          | CD3E antigen, epsilon polypeptide associated protein        | Transcription regulator activity             | Nucleolus            | Transcription regulatory protein        | Regulation of nucleobase, nucleoside and nucleic acid metabolism | -                    | No                       |

Supplementary Table S1. List of quantified proteins in OKF6/TERT1-Smoke cells  
 Raingonalan *et al.*, 2017. Role of protein kinase N2 (PKN2) in cigarette smoke-mediated oncogenic transformation of oral cells

| Gene Symbol | Gene ID | Protein Description                                                | Protein Accession | # Proteins | # Unique Peptides | # Peptides | # PSMs | OKF6/TERT1-Smoke/<br>OKF6/TERT1-Parental<br>(130/126) R1 | OKF6/TERT1-Smoke/<br>OKF6/TERT1-Parental<br>(128/127) R2 | Ratio Standard Errors [%]:<br>OKF6/TERT1-Smoke/<br>OKF6/TERT1-Parental<br>(130/126) R1 | Ratio Standard Errors [%]:<br>OKF6/TERT1-Smoke/<br>OKF6/TERT1-Parental<br>(128/127) R2 | Ratio Variabilities [%]:<br>F13: OKF6/TERT1-<br>Smoke/<br>OKF6/TERT1-Parental<br>(130/126) R1 | Ratio Variabilities [%]:<br>F13: OKF6/TERT1-<br>Smoke/<br>OKF6/TERT1-Parental<br>(128/127) R2 | Ratio Counts: F13:<br>OKF6/TERT1-Smoke/<br>OKF6/TERT1-Parental<br>(130/126) R1 | Ratio Counts: F13:<br>OKF6/TERT1-Smoke/<br>OKF6/TERT1-Parental<br>(128/127) R2 | HPRD ID | Entrez Gene ID | Gene Name                                                | Molecular Function                                                      | Primary Localization    | Molecular Class                     | Biological Process                                                | Domains                   | Plasma Proteome Database |
|-------------|---------|--------------------------------------------------------------------|-------------------|------------|-------------------|------------|--------|----------------------------------------------------------|----------------------------------------------------------|----------------------------------------------------------------------------------------|----------------------------------------------------------------------------------------|-----------------------------------------------------------------------------------------------|-----------------------------------------------------------------------------------------------|--------------------------------------------------------------------------------|--------------------------------------------------------------------------------|---------|----------------|----------------------------------------------------------|-------------------------------------------------------------------------|-------------------------|-------------------------------------|-------------------------------------------------------------------|---------------------------|--------------------------|
| DDX56       | 54606   | probable ATP-dependent RNA helicase DDX56 isoform 1                | NP_061955.1       | 2          | 4                 | 4          | 8      | 1.33                                                     | 1.05                                                     | 10.16                                                                                  | 1.28                                                                                   | 27.6                                                                                          | 2.7                                                                                           | 4                                                                              | 4                                                                              | 12154   | 54606          | DEAD (Asp-Glu-Ala-Asp) box polypeptide 56                | Helicase activity                                                       | Nucleolus               | RNA helicase                        | Regulation of nucleobase, nucleoside and nucleic acid metabolism  | DEXDc:HELIC;NLS           | Yes                      |
| ACP1        | 52      | low molecular weight phosphotyrosine protein phosphatase isoform c | NP_004291.1       | 3          | 4                 | 4          | 13     | 1.33                                                     | 1.02                                                     | 11.93                                                                                  | 11.61                                                                                  | 47.1                                                                                          | 34.4                                                                                          | 8                                                                              | 8                                                                              | 8881    | 52             | acid phosphatase 1, soluble                              | Acid phosphatase activity                                               | Cytoplasm               | Enzyme: Acid phosphatase            | Metabolism;Energy pathways                                        | TM                        | Yes                      |
| LRIF1       | 55791   | ligand-dependent nuclear receptor-interacting factor 1 isoform 1   | NP_060842.3       | 2          | 2                 | 2          | 4      | 1.33                                                     | 1.01                                                     | 16.41                                                                                  | 24.05                                                                                  | 31.6                                                                                          | 35.5                                                                                          | 2                                                                              | 2                                                                              |         |                |                                                          |                                                                         |                         |                                     |                                                                   |                           |                          |
| MORF4L2     | 9643    | mortality factor 4-like protein 2                                  | NP_001135890.1    | 1          | 1                 | 1          | 2      | 1.33                                                     | 0.98                                                     |                                                                                        |                                                                                        |                                                                                               |                                                                                               | 1                                                                              | 1                                                                              | 2326    | 9643           | mortality factor 4 like 2                                | Transcription regulator activity                                        | Nucleus                 | Transcription regulatory protein    | Regulation of nucleobase, nucleoside and nucleic acid metabolism  | HLHLZ                     | Yes                      |
| EPN1        | 29924   | epsin-1 isoform a                                                  | NP_001123543.1    | 3          | 2                 | 3          | 9      | 1.33                                                     | 0.95                                                     | 3.07                                                                                   | 8.15                                                                                   | 7.1                                                                                           | 13.5                                                                                          | 3                                                                              | 3                                                                              | 6270    | 29924          | epsin 1                                                  | Receptor signaling complex scaffold activity                            | Cytoplasm               | Adapter molecule                    | Cell communication;Signal transduction                            | UIM                       | Yes                      |
| JUN         | 3725    | transcription factor AP-1                                          | NP_002219.1       | 1          | 1                 | 1          | 2      | 1.33                                                     | 0.92                                                     |                                                                                        |                                                                                        |                                                                                               |                                                                                               | 1                                                                              | 1                                                                              | 1302    | 3725           | v-jun sarcoma virus 17 oncogene homolog (avian)          | Transcription factor activity                                           | Nucleus                 | Transcription factor                | Regulation of nucleobase, nucleoside and nucleic acid metabolism  | BRLZc:NLS;CC              | Yes                      |
| MRPL48      | 51642   | 39S ribosomal protein L48, mitochondrial                           | NP_057139.1       | 1          | 1                 | 1          | 2      | 1.33                                                     | 0.91                                                     |                                                                                        |                                                                                        |                                                                                               |                                                                                               | 1                                                                              | 1                                                                              | 14767   | 51642          | mitochondrial ribosomal protein L48                      | Structural constituent of ribosome                                      | Mitochondrion           | Ribosomal subunit                   | Protein metabolism                                                | -                         | No                       |
| LIPE        | 3991    | hormone-sensitive lipase                                           | NP_005348.2       | 1          | 5                 | 5          | 10     | 1.33                                                     | 0.69                                                     | 2.02                                                                                   | 9.04                                                                                   | 6                                                                                             | 14                                                                                            | 5                                                                              | 5                                                                              | 1062    | 3991           | lipase, hormone-sensitive                                | Lipase activity                                                         | Cytoplasm               | Enzyme: Lipase                      | Metabolism;Energy pathways                                        | -                         | Yes                      |
| AZGP1       | 563     | zinc-alpha-2-glycoprotein precursor                                | NP_001176.1       | 1          | 1                 | 1          | 12     | 1.33                                                     | 0.6                                                      | 3.63                                                                                   | 10.4                                                                                   | 11.8                                                                                          | 15.5                                                                                          | 6                                                                              | 6                                                                              | 1910    | 563            | alpha-2-glycoprotein 1, zinc                             | Cell adhesion molecule activity                                         | Extracellular           | Adhesion molecule                   | Immune response                                                   | SP;JGC                    | Yes                      |
| FKBP14      | 55033   | peptidyl-prolyl cis-trans isomerase FKBP14 precursor               | NP_060416.1       | 1          | 2                 | 2          | 4      | 1.32                                                     | 1.39                                                     | 13.21                                                                                  | 8.97                                                                                   | 25.1                                                                                          | 17.8                                                                                          | 2                                                                              | 2                                                                              | 16898   | 55033          | FK506 binding protein 14, 22 kDa                         | Isomerase activity                                                      | Endoplasmic reticulum   | Enzyme: Isomerase                   | Metabolism;Energy pathways                                        | SP                        | Yes                      |
| BAX         | 581     | apoptosis regulator BAX isoform 1                                  | NP_001278357.1    | 8          | 7                 | 7          | 39     | 1.32                                                     | 1.34                                                     | 5.63                                                                                   | 13.06                                                                                  | 33.2                                                                                          | 88.7                                                                                          | 19                                                                             | 19                                                                             | 2498    | 581            | BCL2-associated X protein                                | Receptor signaling complex scaffold activity                            | Cytoplasm;Mitochondrion | Adapter molecule                    | Apoptosis                                                         | BCL;TM                    | Yes                      |
| HNRNPUL2    | 221092  | heterogeneous nuclear ribonucleoprotein U-like protein 2           | NP_001073027.1    | 1          | 27                | 27         | 88     | 1.32                                                     | 1.34                                                     | 3.77                                                                                   | 4.95                                                                                   | 36.8                                                                                          | 49.6                                                                                          | 51                                                                             | 50                                                                             | 18952   | 221092         | heterogeneous nuclear ribonucleoprotein U-like 2         | RNA binding                                                             | Nucleus                 | RNA binding protein                 | Regulation of nucleobase, nucleoside and nucleic acid metabolism  | SAP;SPRY                  | Yes                      |
| TFRC        | 7037    | transferrin receptor protein 1                                     | NP_003225.2       | 3          | 21                | 21         | 77     | 1.32                                                     | 1.32                                                     | 2.54                                                                                   | 2.99                                                                                   | 21.4                                                                                          | 25.3                                                                                          | 40                                                                             | 40                                                                             | 1812    | 7037           | transferrin receptor (p90, CD71)                         | Auxiliary transport protein activity                                    | Plasma membrane         | Membrane transport protein          | Transport                                                         | TM                        | Yes                      |
| FAT1        | 2195    | protocadherin Fat 1 precursor                                      | NP_005236.2       | 1          | 53                | 53         | 112    | 1.32                                                     | 1.31                                                     | 2.52                                                                                   | 2.6                                                                                    | 27                                                                                            | 27.8                                                                                          | 64                                                                             | 64                                                                             | 2986    | 2195           | FAT tumor suppressor homolog 1 (Drosophila)              | Cell adhesion molecule activity                                         | Plasma membrane         | Adhesion molecule                   | Cell communication;Signal transduction                            | Cadherin;LAMG;EGFCA;TM;SP | Yes                      |
| NFKB1       | 84365   | MyD88 interacting nuclear factor-kappa-B protein                   | NP_115766.3       | 1          | 8                 | 8          | 24     | 1.32                                                     | 1.28                                                     | 1.86                                                                                   | 1.79                                                                                   | 8.8                                                                                           | 8.3                                                                                           | 13                                                                             | 13                                                                             |         |                |                                                          |                                                                         |                         |                                     |                                                                   |                           |                          |
| API5        | 8539    | apoptosis inhibitor 5 isoform b                                    | NP_006586.1       | 4          | 14                | 14         | 53     | 1.32                                                     | 1.27                                                     | 2.67                                                                                   | 4.29                                                                                   | 17                                                                                            | 26.5                                                                                          | 23                                                                             | 23                                                                             | 16500   | 8539           | apoptosis inhibitor 5                                    | Molecular function unknown                                              | Nucleus                 | Unclassified                        | Apoptosis                                                         | -                         | Yes                      |
| DDX21       | 9188    | nucleolar RNA helicase 2 isoform 1                                 | NP_004719.2       | 2          | 36                | 38         | 134    | 1.32                                                     | 1.23                                                     | 1.94                                                                                   | 2.7                                                                                    | 20.7                                                                                          | 27.1                                                                                          | 64                                                                             | 65                                                                             | 5895    | 9188           | DEAD (Asp-Glu-Ala-Asp) box polypeptide 21                | ATPase activity                                                         | Nucleolus               | ATPase                              | Metabolism;Energy pathways                                        | DEXDc:HELIC               | Yes                      |
| OSBP        | 5007    | oxysterol-binding protein 1                                        | NP_002547.1       | 1          | 12                | 12         | 32     | 1.32                                                     | 1.19                                                     | 7.57                                                                                   | 6.35                                                                                   | 44.2                                                                                          | 33                                                                                            | 18                                                                             | 18                                                                             | 1327    | 5007           | oxysterol binding protein                                | Transporter activity                                                    | Cytoplasm               | Transport/cargo protein             | Transport                                                         | PH;CC                     | Yes                      |
| UBE2M       | 9040    | NEDD8-conjugating enzyme Ubc12                                     | NP_003960.1       | 1          | 3                 | 3          | 9      | 1.32                                                     | 1.18                                                     | 4.23                                                                                   | 13.62                                                                                  | 12.5                                                                                          | 37                                                                                            | 5                                                                              | 5                                                                              | 4414    | 9040           | ubiquitin-conjugating enzyme E2M (UBC2) (homolog, yeast) | Ubiquitin-specific protease activity                                    | -                       | Ubiquitin proteasome system protein | Protein metabolism                                                | UBC                       | No                       |
| USP15       | 9958    | ubiquitin carboxyl-terminal hydrolase 15 isoform 1                 | NP_001239007.1    | 3          | 8                 | 10         | 21     | 1.32                                                     | 1.18                                                     | 7.58                                                                                   | 3.12                                                                                   | 32.6                                                                                          | 11.7                                                                                          | 10                                                                             | 10                                                                             | 5293    | 9958           | ubiquitin specific protease 15                           | Ubiquitin-specific protease activity                                    | Cytoplasm               | Ubiquitin proteasome system protein | Protein metabolism                                                | DUSP;UCH                  | Yes                      |
| EPN2        | 22905   | epsin-2 isoform b                                                  | NP_055779.2       | 3          | 3                 | 4          | 7      | 1.32                                                     | 1.18                                                     | 1.27                                                                                   | 0.84                                                                                   | 2.9                                                                                           | 1.7                                                                                           | 3                                                                              | 3                                                                              | 6271    | 22905          | epsin 2                                                  | Receptor signaling complex scaffold activity;Molecular function unknown | Cytoplasmic vesicle     | Unclassified;Adapter molecule       | Cell communication;Signal transduction;Biological process unknown | UIM                       | Yes                      |
| BCLAF1      | 9774    | bcl-2-associated transcription factor 1 isoform 1                  | NP_055554.1       | 4          | 23                | 23         | 39     | 1.32                                                     | 1.18                                                     | 4.68                                                                                   | 6.1                                                                                    | 28                                                                                            | 33.1                                                                                          | 20                                                                             | 20                                                                             | 16544   | 9774           | BCL2-associated transcription factor 1                   | Transcription factor activity                                           | Nucleus                 | Transcription factor                | Regulation of nucleobase, nucleoside and nucleic acid metabolism  | -                         | Yes                      |
| UBP1        | 7342    | upstream-binding protein 1 isoform LBP-1b                          | NP_055332.3       | 2          | 2                 | 3          | 6      | 1.32                                                     | 1.17                                                     | 14.57                                                                                  | 15.66                                                                                  | 27.8                                                                                          | 26.3                                                                                          | 2                                                                              | 2                                                                              | 10291   | 7342           | upstream binding protein 1 (LBP-1a)                      | Transcription factor activity                                           | Nucleus                 | Transcription factor                | Regulation of nucleobase, nucleoside and nucleic acid metabolism  | SAM_PNT                   | No                       |
| RAD54L2     | 23132   | helicase ARIP4                                                     | NP_055921.2       | 1          | 1                 | 1          | 2      | 1.32                                                     | 1.13                                                     |                                                                                        |                                                                                        |                                                                                               |                                                                                               | 1                                                                              | 1                                                                              | 10018   | 23132          | None                                                     | DNA binding                                                             | Nucleus                 | DNA binding protein                 | Regulation of nucleobase, nucleoside and nucleic acid metabolism  | DEXDc:HELIC               | Yes                      |
| GRSF1       | 2926    | G-rich sequence factor 1 isoform 1                                 | NP_002083.3       | 2          | 6                 | 6          | 14     | 1.32                                                     | 1.13                                                     | 5.03                                                                                   | 7.81                                                                                   | 17.7                                                                                          | 23.6                                                                                          | 7                                                                              | 7                                                                              | 7276    | 2926           | G-rich RNA sequence binding factor 1                     | RNA binding                                                             | Cytoplasm               | RNA binding protein                 | Protein metabolism                                                | RRM                       | Yes                      |
| SPATS2      | 65244   | spermatogenesis-associated serine-rich protein 2                   | NP_075559.2       | 1          | 4                 | 4          | 9      | 1.32                                                     | 1.12                                                     | 4.04                                                                                   | 13                                                                                     | 10.7                                                                                          | 29.9                                                                                          | 4                                                                              | 4                                                                              | 15434   | 65244          | spermatogenesis associated, serine-rich 2                | Molecular function unknown                                              | Cytoplasm               | Unclassified                        | Biological process unknown                                        | -                         | No                       |
| TSMF        | 10102   | elongation factor Ts, mitochondrial isoform 1 precursor            | NP_001166167.1    | 2          | 3                 | 3          | 8      | 1.32                                                     | 1.1                                                      | 19.3                                                                                   | 13.96                                                                                  | 54.6                                                                                          | 31.4                                                                                          | 4                                                                              | 4                                                                              | 5285    | 10102          | Ts translation elongation factor, mitochondrial          | Translation regulator activity                                          | Mitochondrion           | Translation regulatory protein      | Protein metabolism                                                | UBA                       | Yes                      |

Supplementary Table S1. List of quantified proteins in OKF6/TERT1-Smoke cells  
 Raigopaln *et al.*, 2017. Role of protein kinase N2 (PKN2) in cigarette smoke-mediated oncogenic transformation of oral cells

| Gene Symbol | Gene ID | Protein Description                                                     | Protein Accession | # Proteins | # Unique Peptides | # Peptides | # PSMs | OKF6/TERT1-Smoke/<br>OKF6/TERT1-Parental<br>(130/126) R1 | OKF6/TERT1-Smoke/<br>OKF6/TERT1-Parental<br>(128/127) R2 | Ratio Standard Errors [%]:<br>OKF6/TERT1-Smoke/<br>OKF6/TERT1-Parental<br>(130/126) R1 | Ratio Standard Errors [%]:<br>OKF6/TERT1-Smoke/<br>OKF6/TERT1-Parental<br>(128/127) R2 | Ratio Variabilities [%]:<br>F13: OKF6/TERT1-<br>Smoke/<br>OKF6/TERT1-Parental<br>(130/126) R1 | Ratio Variabilities [%]:<br>F13: OKF6/TERT1-<br>Smoke/<br>OKF6/TERT1-Parental<br>(128/127) R2 | Ratio Counts: F13:<br>OKF6/TERT1-Smoke/<br>OKF6/TERT1-Parental<br>(130/126) R1 | Ratio Counts: F13:<br>OKF6/TERT1-Smoke/<br>OKF6/TERT1-Parental<br>(128/127) R2 | HPRD ID | Entrez Gene ID | Gene Name                                                              | Molecular Function                                     | Primary Localization  | Molecular Class                       | Biological Process                                                           | Domains              | Plasma Proteome Database |
|-------------|---------|-------------------------------------------------------------------------|-------------------|------------|-------------------|------------|--------|----------------------------------------------------------|----------------------------------------------------------|----------------------------------------------------------------------------------------|----------------------------------------------------------------------------------------|-----------------------------------------------------------------------------------------------|-----------------------------------------------------------------------------------------------|--------------------------------------------------------------------------------|--------------------------------------------------------------------------------|---------|----------------|------------------------------------------------------------------------|--------------------------------------------------------|-----------------------|---------------------------------------|------------------------------------------------------------------------------|----------------------|--------------------------|
| C7orf43     | 55262   | uncharacterized protein C7orf43 isoform 1                               | NP_060745.3       | 2          | 1                 | 1          | 3      | 1.32                                                     | 1.09                                                     |                                                                                        |                                                                                        |                                                                                               |                                                                                               | 1                                                                              |                                                                                | 7716    | 55262          | None                                                                   | Molecular function unknown                             | -                     | Unclassified                          | Biological process unknown                                                   | -                    | Yes                      |
| MIER1       | 57708   | mesoderm induction early response protein 1 isoform b                   | NP_001071168.2    | 10         | 1                 | 2          | 3      | 1.32                                                     | 1.01                                                     |                                                                                        |                                                                                        |                                                                                               |                                                                                               | 1                                                                              | 1                                                                              | 11362   | 57708          | None                                                                   | Transcription regulator activity                       | Nucleus/Cytoplasm     | Transcription regulatory protein      | Regulation of nucleobase, nucleotide and nucleic acid metabolism             | SANT,SP,NLS          | Yes                      |
| CMTR1       | 23070   | cap-specific mRNA (nucleoside-2-O-methyltransferase 1                   | NP_055865.1       | 1          | 2                 | 2          | 4      | 1.32                                                     | 0.97                                                     | 8.02                                                                                   | 14.58                                                                                  | 15                                                                                            | 20.1                                                                                          | 2                                                                              | 2                                                                              |         |                |                                                                        |                                                        |                       |                                       |                                                                              |                      |                          |
| PCCB        | 5096    | propionyl-CoA carboxylase beta chain, mitochondrial isoform 2 precursor | NP_001171485.1    | 2          | 9                 | 9          | 13     | 1.32                                                     | 0.94                                                     | 10.5                                                                                   | 8.36                                                                                   | 35                                                                                            | 19.4                                                                                          | 6                                                                              | 6                                                                              | 1982    | 5096           | propionyl Coenzyme A carboxylase, betapolypeptide                      | Ligase activity                                        | Mitochondrion         | Enzyme: Carboxylase                   | Metabolism;Energy pathways                                                   | SP                   | Yes                      |
| CBWD1       | 55871   | COBW domain-containing protein 1 isoform 1                              | NP_060961.3       | 4          | 1                 | 1          | 4      | 1.32                                                     | 0.89                                                     | 8.93                                                                                   | 5.61                                                                                   | 16.8                                                                                          | 7.1                                                                                           | 2                                                                              | 2                                                                              | 16686   | 55871          | COBW domain containing 1                                               | Molecular function unknown                             | -                     | Unclassified                          | Biological process unknown                                                   | AAA                  | No                       |
| SKP1        | 6500    | S-phase kinase-associated protein 1 isoform b                           | NP_733779.1       | 2          | 10                | 11         | 65     | 1.32                                                     | 0.77                                                     | 4.85                                                                                   | 19.07                                                                                  | 34.9                                                                                          | 90.9                                                                                          | 28                                                                             | 28                                                                             | 3255    | 6500           | S-phase kinase-associated protein 1A (p19A)                            | Ubiquitin-specific protease activity                   | Nucleus               | Ubiquitin proteasome system protein   | Protein metabolism;Regulation of cell cycle;Chromosome segregation           | SKP1                 | Yes                      |
| PPHLN1      | 51535   | periplitin-1 isoform 6                                                  | NP_001137259.1    | 1          | 1                 | 1          | 2      | 1.32                                                     | 0.69                                                     |                                                                                        |                                                                                        |                                                                                               |                                                                                               | 1                                                                              | 1                                                                              | 10488   | 51535          | periplitin 1                                                           | Structural molecule activity                           | Nucleus/Cytoplasm     | Structural protein                    | Cell growth and/or maintenance                                               | NES,NLS              | Yes                      |
| TRAPPC13    | 80006   | trafficking protein particle complex subunit 13 isoform 1               | NP_001087224.1    | 4          | 1                 | 1          | 2      | 1.32                                                     | 0.67                                                     |                                                                                        |                                                                                        |                                                                                               |                                                                                               | 1                                                                              | 1                                                                              |         |                |                                                                        |                                                        |                       |                                       |                                                                              |                      |                          |
| FECH        | 2235    | ferrochelatase, mitochondrial isoform a precursor                       | NP_001012533.1    | 2          | 2                 | 2          | 4      | 1.32                                                     | 0.59                                                     | 4.53                                                                                   | 16.2                                                                                   | 10.3                                                                                          | 16.7                                                                                          | 3                                                                              | 3                                                                              | 1509    | 2235           | ferrochelatase (protoporphyrin)                                        | Ligase activity                                        | Cytoplasm             | Enzyme: Ligase                        | Metabolism;Energy pathways                                                   | -                    | Yes                      |
| FAM162A     | 26355   | protein FAM162A                                                         | NP_055182.3       | 1          | 2                 | 2          | 7      | 1.32                                                     | 0.58                                                     | 7.93                                                                                   | 48.92                                                                                  | 21.1                                                                                          | 61.3                                                                                          | 4                                                                              | 4                                                                              | 6422    | 26355          | None                                                                   | Molecular function unknown                             | -                     | Unclassified                          | Biological process unknown                                                   | TM                   | No                       |
| RGP1        | 9827    | RAB6A-GEF complex partner protein 2                                     | NP_001073965.2    | 1          | 1                 | 1          | 2      | 1.31                                                     | 1.77                                                     |                                                                                        |                                                                                        |                                                                                               |                                                                                               | 1                                                                              | 1                                                                              | 13790   | 9827           | KIAA0258                                                               | Molecular function unknown                             | -                     | Unclassified                          | Biological process unknown                                                   | -                    | Yes                      |
| DKK3        | 27122   | dickkopf-related protein 3 precursor                                    | NP_056965.3       | 1          | 2                 | 2          | 3      | 1.31                                                     | 1.68                                                     | 27.12                                                                                  | 10.98                                                                                  | 53.5                                                                                          | 26.6                                                                                          | 2                                                                              | 2                                                                              | 5659    | 27122          | dickkopf homolog 3 (Xenopus laevis)                                    | Receptor binding;Lipid binding                         | Extracellular         | Ligand                                | Cell communication;Signal transduction                                       | SP,CC                | Yes                      |
| MAPRE1      | 22919   | microtubule-associated protein RP/EB family member 1                    | NP_036457.1       | 1          | 10                | 10         | 39     | 1.31                                                     | 1.64                                                     | 4.14                                                                                   | 2.87                                                                                   | 22                                                                                            | 18.4                                                                                          | 16                                                                             | 15                                                                             | 4379    | 22919          | microtubule-associated protein, RP/EB family member 1                  | Protein binding                                        | Centrosome            | Cell cycle control protein            | Cell communication;Signal transduction                                       | CH,CC                | Yes                      |
| DLGAP4      | 22839   | disks large-associated protein 4 isoform a                              | NP_055717.2       | 3          | 5                 | 5          | 8      | 1.31                                                     | 1.46                                                     | 2.66                                                                                   | 11.69                                                                                  | 7.8                                                                                           | 39.6                                                                                          | 5                                                                              | 5                                                                              | 16826   | 22839          | disks, large (Drosophila) homolog-associated protein 4                 | Molecular function unknown                             | Cytosol               | Adapter molecule;Unclassified         | Cell communication;Signal transduction                                       | -                    | Yes                      |
| ALDH2       | 217     | aldehyde dehydrogenase, mitochondrial isoform 1 precursor               | NP_000681.2       | 2          | 14                | 17         | 53     | 1.31                                                     | 1.44                                                     | 3.81                                                                                   | 3.66                                                                                   | 24.8                                                                                          | 26.2                                                                                          | 24                                                                             | 24                                                                             | 3       | 217            | aldehyde dehydrogenase 2 family (mitochondrial)                        | Catalytic activity                                     | Mitochondrion         | Enzyme: Dehydrogenase                 | Metabolism;Energy pathways                                                   | -                    | Yes                      |
| PKN1        | 5585    | serine/threonine-protein kinase N1 isoform 1                            | NP_998725.1       | 2          | 1                 | 1          | 2      | 1.31                                                     | 1.42                                                     |                                                                                        |                                                                                        |                                                                                               |                                                                                               | 1                                                                              | 1                                                                              | 3019    | 5585           | protein kinase N1                                                      | Protein serine/threonine kinase activity               | Cytoplasm             | Serine/threonine kinase               | Cell communication;Signal transduction                                       | HR1,C2,S_T_kinase,CC | Yes                      |
| EIF2S2      | 8894    | eukaryotic translation initiation factor 2 subunit 2                    | NP_003899.2       | 1          | 18                | 18         | 65     | 1.31                                                     | 1.36                                                     | 2.01                                                                                   | 5.09                                                                                   | 15.9                                                                                          | 43.4                                                                                          | 36                                                                             | 36                                                                             | 4882    | 8894           | eukaryotic translation initiation factor 2, subunit 2, beta, 38kDa     | Translation regulator activity                         | Cytoplasm             | Translation regulatory protein        | Protein metabolism                                                           | -                    | Yes                      |
| PTPNA       | 5306    | phosphatidylinositol transfer protein alpha isoform                     | NP_006215.1       | 1          | 4                 | 4          | 7      | 1.31                                                     | 1.32                                                     | 1.35                                                                                   | 10.12                                                                                  | 3.5                                                                                           | 27.2                                                                                          | 4                                                                              | 4                                                                              | 2548    | 5306           | phosphatidylinositol transfer protein, alpha                           | Transporter activity                                   | Cytoplasm             | Transport/cargo protein               | Transport                                                                    | -                    | Yes                      |
| TIMM50      | 92609   | mitochondrial import inner membrane translocase subunit TIM50           | NP_001001563.1    | 1          | 9                 | 9          | 29     | 1.31                                                     | 1.32                                                     | 5.31                                                                                   | 7.01                                                                                   | 28.5                                                                                          | 38.3                                                                                          | 16                                                                             | 16                                                                             | 12118   | 92609          | translocase of inner mitochondrial membrane 50homolog (yeast)          | Protein tyrosine/serine/threonine phosphatase activity | Mitochondrion         | Dual specificity phosphatase          | Cell communication;Signal transduction                                       | CPDc                 | No                       |
| IGFBP3      | 10643   | insulin-like growth factor 2 mRNA-binding protein 3                     | NP_006538.2       | 1          | 18                | 20         | 73     | 1.31                                                     | 1.3                                                      | 4.07                                                                                   | 4.41                                                                                   | 28.3                                                                                          | 30.5                                                                                          | 27                                                                             | 27                                                                             | 16306   | 10643          | None                                                                   | Translation regulator activity                         | Cytoplasm             | Translation regulatory protein        | Protein metabolism                                                           | RRM;KH,NLS           | No                       |
| GLA         | 2717    | alpha-galactosidase A precursor                                         | NP_000160.1       | 1          | 4                 | 4          | 9      | 1.31                                                     | 1.26                                                     | 5.13                                                                                   | 5.76                                                                                   | 16.6                                                                                          | 17.9                                                                                          | 6                                                                              | 6                                                                              | 2357    | 2717           | galactosidase, alpha                                                   | Galactosidase activity                                 | Endoplasmic reticulum | Enzyme: Galactosidase                 | Metabolism;Energy pathways                                                   | SP                   | Yes                      |
| SAMHD1      | 25939   | deoxynucleoside triphosphate triphosphohydrolase SAMHD1                 | NP_056289.2       | 1          | 17                | 17         | 47     | 1.31                                                     | 1.25                                                     | 3.97                                                                                   | 5.59                                                                                   | 27                                                                                            | 37                                                                                            | 26                                                                             | 26                                                                             | 8418    | 25939          | SAM domain and HD domain 1                                             | GTPase activity                                        | Nucleus/Cytoplasm     | GTPase                                | Immune response                                                              | SAM;Hdc              | Yes                      |
| NOLC1       | 9221    | nucleolar and coiled-body phosphoprotein 1 isoform 1                    | NP_001271317.1    | 3          | 17                | 17         | 53     | 1.31                                                     | 1.24                                                     | 2.69                                                                                   | 2.16                                                                                   | 19.8                                                                                          | 15                                                                                            | 31                                                                             | 31                                                                             | 3864    | 9221           | nucleolar and coiled-body phosphoprotein 1                             | Transcription factor activity                          | Nucleolus             | Transcription factor                  | Regulation of nucleobase, nucleoside, nucleotide and nucleic acid metabolism | LISH                 | Yes                      |
| XRCC4       | 7518    | DNA repair protein XRCC4 isoform 2                                      | NP_071801.1       | 2          | 3                 | 3          | 3      | 1.31                                                     | 1.17                                                     | 4.34                                                                                   | 4.7                                                                                    | 9.8                                                                                           | 9.5                                                                                           | 3                                                                              | 3                                                                              | 15951   | 7518           | X-ray repair complementing defective repair in Chinese hamster cells 4 | DNA repair protein                                     | Nucleus               | DNA repair protein                    | DNA repair                                                                   | CC                   | Yes                      |
| ELMO2       | 63916   | engulfment and cell motility protein 2                                  | NP_877496.1       | 3          | 4                 | 4          | 6      | 1.31                                                     | 1.16                                                     | 8.97                                                                                   | 14.91                                                                                  | 16.7                                                                                          | 24.7                                                                                          | 2                                                                              | 2                                                                              | 12103   | 63916          | engulfment and cell motility 2 (ced-12 homolog,C. elegans)             | Molecular function unknown                             | Cytoplasm             | Unclassified                          | Signal transduction;Cell growth and/or maintenance;Cell migration            | PHLZ                 | Yes                      |
| SNRNP70     | 6625    | U1 small nuclear ribonucleoprotein 70 kDa isoform 1                     | NP_003080.2       | 2          | 15                | 15         | 54     | 1.31                                                     | 1.09                                                     | 3.24                                                                                   | 6.61                                                                                   | 21.5                                                                                          | 37.1                                                                                          | 25                                                                             | 25                                                                             | 1617    | 6625           | small nuclear ribonucleoprotein 70kDa/polypeptide (RNP antigen)        | Ribonucleoprotein-RNA binding                          | Nucleus               | Ribonucleoprotein-RNA binding protein | Regulation of nucleobase, nucleoside, nucleotide and nucleic acid metabolism | CC;RRM               | Yes                      |
| NOL8        | 55035   | nucleolar protein 8 isoform a                                           | NP_060418.4       | 2          | 3                 | 3          | 3      | 1.31                                                     | 1.06                                                     | 2.85                                                                                   | 5.37                                                                                   | 6.5                                                                                           | 9.9                                                                                           | 3                                                                              | 3                                                                              | 11397   | 55035          | nucleolar protein 8                                                    | RNA binding                                            | Nucleolus             | RNA binding protein                   | Regulation of nucleobase, nucleoside, nucleotide and nucleic acid metabolism | RRM;CC               | No                       |

Supplementary Table S1. List of quantified proteins in OKF6/TERT1-Smoke cells  
 Raigopalani *et al.*, 2017. Role of protein kinase N2 (PKN2) in cigarette smoke-mediated oncogenic transformation of oral cells

| Gene Symbol   | Gene ID   | Protein Description                                                       | Protein Accession | # Proteins | # Unique Peptides | # Peptides | # PSMs | OKF6/TERT1-Smoke/<br>OKF6/TERT1-Parental<br>(130/126) R1 | OKF6/TERT1-Smoke/<br>OKF6/TERT1-Parental<br>(128/127) R2 | Ratio Standard Errors [%]:<br>OKF6/TERT1-Smoke/<br>OKF6/TERT1-Parental<br>(130/126) R1 | Ratio Standard Errors [%]:<br>OKF6/TERT1-Smoke/<br>OKF6/TERT1-Parental<br>(128/127) R2 | Ratio Variabilities [%]:<br>F13: OKF6/TERT1-<br>Smoke/<br>OKF6/TERT1-Parental<br>(130/126) R1 | Ratio Variabilities [%]:<br>F13: OKF6/TERT1-<br>Smoke/<br>OKF6/TERT1-Parental<br>(128/127) R2 | Ratio Counts: F13:<br>OKF6/TERT1-Smoke/<br>OKF6/TERT1-Parental<br>(130/126) R1 | Ratio Counts: F13:<br>OKF6/TERT1-Smoke/<br>OKF6/TERT1-Parental<br>(128/127) R2 | HPRD ID | Entrez Gene Id | Gene Name                                                        | Molecular Function                   | Primary Localization  | Molecular Class                             | Biological Process                                               | Domains       | Plasma Proteome Database |  |
|---------------|-----------|---------------------------------------------------------------------------|-------------------|------------|-------------------|------------|--------|----------------------------------------------------------|----------------------------------------------------------|----------------------------------------------------------------------------------------|----------------------------------------------------------------------------------------|-----------------------------------------------------------------------------------------------|-----------------------------------------------------------------------------------------------|--------------------------------------------------------------------------------|--------------------------------------------------------------------------------|---------|----------------|------------------------------------------------------------------|--------------------------------------|-----------------------|---------------------------------------------|------------------------------------------------------------------|---------------|--------------------------|--|
| RNF14         | 9604      | E3 ubiquitin-protein ligase RNF14 isoform 1                               | NP_001188294.1    | 1          | 1                 | 1          | 2      | 1.31                                                     | 1.03                                                     |                                                                                        |                                                                                        |                                                                                               |                                                                                               | 1                                                                              | 1                                                                              | 5745    | 9604           | ring finger protein 14                                           | Transcription regulator activity     | Nucleus               | Transcription regulatory protein            | Regulation of gene expression, epigenetic                        | RWD,IBR,RING  | Yes                      |  |
| WDR77         | 79084     | methylosome protein 50                                                    | NP_077007.1       | 1          | 3                 | 3          | 8      | 1.31                                                     | 1.01                                                     | 5.54                                                                                   | 5.06                                                                                   | 16.4                                                                                          | 11.5                                                                                          | 5                                                                              | 5                                                                              | 14387   | 79084          | None                                                             | Molecular function unknown           | Nucleus               | Unclassified                                | Biological process unknown                                       | WD40          | No                       |  |
| EIF4EBP1      | 1978      | eukaryotic translation initiation factor 4E-binding protein 1             | NP_004086.1       | 1          | 1                 | 1          | 4      | 1.31                                                     | 0.98                                                     | 16.33                                                                                  | 3.25                                                                                   | 31.1                                                                                          | 4.5                                                                                           | 2                                                                              | 2                                                                              | 3746    | 1978           | eukaryotic translation initiation factor 4E-binding protein 1    | Translation regulator activity       | Cytoplasm             | Translation regulatory protein              | Protein metabolism                                               | -             | Yes                      |  |
| INTS2         | 57508     | integrator complex subunit 2                                              | NP_065799.1       | 1          | 1                 | 2          | 4      | 1.31                                                     | 0.97                                                     |                                                                                        |                                                                                        |                                                                                               |                                                                                               | 1                                                                              | 1                                                                              | 11137   | 57508          | None                                                             | Molecular function unknown           | -                     | Unclassified                                | Biological process unknown                                       | -             | No                       |  |
| GEMIN2        | 8487      | gem-associated protein 2 isoform alpha                                    | NP_003607.1       | 3          | 2                 | 2          | 3      | 1.31                                                     | 0.94                                                     | 2.81                                                                                   | 0.02                                                                                   | 5.2                                                                                           | 0                                                                                             | 2                                                                              | 2                                                                              |         |                |                                                                  |                                      |                       |                                             |                                                                  |               |                          |  |
| TNFRSF10B     | 8795      | tumor necrosis factor receptor superfamily member 10B isoform 1 precursor | NP_003833.4       | 2          | 2                 | 2          | 3      | 1.31                                                     | 0.92                                                     | 11.13                                                                                  | 24.28                                                                                  | 20.8                                                                                          | 32.2                                                                                          | 2                                                                              | 2                                                                              | 4680    | 8795           | tumor necrosis factor receptor superfamily member 10b            | Receptor activity                    | Plasma membrane       | Cell surface receptor                       | Apoptosis;Cell communication;Signal transduction                 | TM,TNFR,DEATH | Yes                      |  |
| RBM8A         | 9939      | RNA-binding protein 8A                                                    | NP_005096.1       | 1          | 6                 | 6          | 17     | 1.31                                                     | 0.9                                                      | 4.25                                                                                   | 17.12                                                                                  | 16.8                                                                                          | 49.1                                                                                          | 9                                                                              | 9                                                                              | 5609    | 9939           | RNA binding motif protein 8A                                     | RNA binding                          | Nucleus;Cytoplasm     | RNA binding protein                         | Regulation of nucleobase, nucleoside and nucleic acid metabolism | RRM           | Yes                      |  |
| ADD1          | 118       | alpha-adducin isoform b                                                   | NP_054908.2       | 5          | 3                 | 3          | 8      | 1.31                                                     | 0.88                                                     | 3.7                                                                                    | 8.96                                                                                   | 9.7                                                                                           | 15.9                                                                                          | 4                                                                              | 4                                                                              | 36      | 118            | adducin 1 (alpha)                                                | Structural molecule activity         | Nucleus;Cytoplasm     | Structural protein                          | Cell growth and/or maintenance                                   | CC            | Yes                      |  |
| POLR2G        | 5436      | DNA-directed RNA polymerase II subunit RPB7                               | NP_002687.1       | 1          | 1                 | 1          | 2      | 1.31                                                     | 0.86                                                     |                                                                                        |                                                                                        |                                                                                               |                                                                                               | 1                                                                              | 1                                                                              | 15995   | 5436           | polymerase (RNA) II (DNA directed) polypeptideG                  | DNA-directed RNA polymerase activity | Nucleus               | RNA polymerase                              | Regulation of nucleobase, nucleoside and nucleic acid metabolism | S1            | No                       |  |
| PFDN1         | 5201      | prefoldin subunit 1                                                       | NP_002613.2       | 1          | 1                 | 1          | 1      | 1.31                                                     | 0.83                                                     |                                                                                        |                                                                                        |                                                                                               |                                                                                               | 1                                                                              | 1                                                                              | 5357    | 5201           | prefoldin 1                                                      | Chaperone activity                   | Cytoplasm             | Chaperone                                   | Protein metabolism                                               | CC            | Yes                      |  |
| UCHL3         | 7347      | ubiquitin carboxyl-terminal hydrolase isozyme L3 isoform 2                | NP_005993.1       | 2          | 5                 | 5          | 14     | 1.31                                                     | 0.81                                                     | 8.36                                                                                   | 14.82                                                                                  | 29.7                                                                                          | 32.7                                                                                          | 7                                                                              | 7                                                                              | 4367    | 7347           | ubiquitin carboxyl-terminal esterase L3 (ubiquitin thioesterase) | Ubiquitin-specific protease activity | Cytoplasm             | Ubiquitin proteasome system protein         | Protein metabolism                                               | -             | Yes                      |  |
| MAX           | 4149      | protein max isoform a                                                     | NP_002373.3       | 7          | 1                 | 1          | 2      | 1.31                                                     | 0.8                                                      |                                                                                        |                                                                                        |                                                                                               |                                                                                               | 1                                                                              | 1                                                                              | 1113    | 4149           | MYC associated factor X                                          | Transcription factor activity        | Nucleus;Cytoplasm     | Transcription factor                        | Regulation of nucleobase, nucleoside and nucleic acid metabolism | HLH,CC,ZZ     | No                       |  |
| RPS8          | 6202      | 40S ribosomal protein S8                                                  | NP_001003.1       | 1          | 9                 | 9          | 143    | 1.31                                                     | 0.78                                                     | 2.31                                                                                   | 6.96                                                                                   | 27.1                                                                                          | 50.2                                                                                          | 77                                                                             | 77                                                                             | 15969   | 6202           | ribosomal protein S8                                             | Structural constituent of ribosome   | Cytoplasm             | Ribosomal subunit                           | Protein metabolism                                               | -             | Yes                      |  |
| KIDINS220     | 57498     | kinase D-interacting substrate of 220 kDa                                 | NP_065789.1       | 1          | 1                 | 1          | 2      | 1.31                                                     | 0.76                                                     |                                                                                        |                                                                                        |                                                                                               |                                                                                               | 1                                                                              | 1                                                                              | 17235   | 57498          | None                                                             | Protein kinase binding               | Plasma membrane       | Integral membrane protein                   | Cell growth and/or maintenance                                   | ANK,TM        | No                       |  |
| RRAGC         | 64121     | ras-related GTP-binding protein C isoform 1                               | NP_071440.1       | 3          | 3                 | 3          | 6      | 1.31                                                     | 0.69                                                     | 1.94                                                                                   | 18.52                                                                                  | 4.4                                                                                           | 22.4                                                                                          | 3                                                                              | 3                                                                              | 12198   | 64121          | Ras-related GTP binding C                                        | GTPase activity                      | Cytoplasm             | G protein                                   | Cell communication;Signal transduction                           | -             | No                       |  |
| INTS5         | 80789     | integrator complex subunit 5                                              | NP_085131.1       | 1          | 1                 | 1          | 2      | 1.31                                                     | 0.58                                                     |                                                                                        |                                                                                        |                                                                                               |                                                                                               | 1                                                                              | 1                                                                              | 13883   | 80789          | None                                                             | Protein binding                      | Nucleus               | Unclassified                                | RNA metabolism;Transcription                                     | -             | Yes                      |  |
| HY1           | 81888     | putative hydroxypyruvate isomerase isoform 3                              | NP_001177809.1    | 3          | 1                 | 1          | 7      | 1.3                                                      | 1.97                                                     | 10.61                                                                                  | 7                                                                                      | 19.8                                                                                          | 19.7                                                                                          | 2                                                                              | 2                                                                              | 11039   | 81888          | hydroxypyruvate isomerase homolog (E. coli)                      | DNA binding                          | Nucleus               | DNA binding protein                         | Regulation of nucleobase, nucleoside and nucleic acid metabolism | -             | Yes                      |  |
| TOMM34        | 10953     | mitochondrial import receptor subunit TOM34                               | NP_006800.2       | 1          | 9                 | 9          | 25     | 1.3                                                      | 1.89                                                     | 5.14                                                                                   | 6.1                                                                                    | 24.4                                                                                          | 43.5                                                                                          | 13                                                                             | 13                                                                             | 11641   | 10953          | translocase of outer mitochondrial membrane 34                   | Transporter activity                 | Cytoplasm             | Transport/cargo protein                     | Transport                                                        | TPR           | Yes                      |  |
| UGDH          | 7358      | UDP-glucose 6-dehydrogenase isoform 1                                     | NP_003350.1       | 3          | 14                | 14         | 43     | 1.3                                                      | 1.71                                                     | 5.6                                                                                    | 6.42                                                                                   | 34.4                                                                                          | 53.7                                                                                          | 21                                                                             | 21                                                                             | 4535    | 7358           | UDP-glucose dehydrogenase                                        | Catalytic activity                   | -                     | Enzyme: Dehydrogenase                       | Metabolism;Energy pathways                                       | -             | Yes                      |  |
| DND1          | 373863    | dead end protein homolog 1                                                | NP_919225.1       | 1          | 1                 | 1          | 2      | 1.3                                                      | 1.41                                                     |                                                                                        |                                                                                        |                                                                                               |                                                                                               | 1                                                                              | 1                                                                              | 13240   | 373863         | dead end homolog 1 (zebrafish)                                   | RNA binding                          | Cytoplasm             | RNA binding protein                         | Regulation of nucleobase, nucleoside and nucleic acid metabolism | RRM           | No                       |  |
| DYNC2H1       | 79659     | cytoplasmic dynein 2 heavy chain 1 isoform 2                              | NP_001073932.1    | 2          | 1                 | 1          | 1      | 1.3                                                      | 1.4                                                      |                                                                                        |                                                                                        |                                                                                               |                                                                                               | 1                                                                              | 1                                                                              | 10344   | 79659          | dynein, cytoplasmic, heavy polypeptide 2                         | Motor activity                       | Golgi apparatus       | Motor protein                               | Cell growth and/or maintenance                                   | AAA,CC        | Yes                      |  |
| LOC101060521  | 101060521 | DNA-directed RNA polymerase III subunit RPC5 isoform X1                   | XP_005276555.2    | 6          | 1                 | 1          | 1      | 1.3                                                      | 1.3                                                      |                                                                                        |                                                                                        |                                                                                               |                                                                                               | 1                                                                              | 1                                                                              |         |                |                                                                  |                                      |                       |                                             |                                                                  |               |                          |  |
| STAUI1        | 6780      | double-stranded RNA-binding protein Staufen homolog 1 isoform b           | NP_059347.2       | 2          | 1                 | 17         | 41     | 1.3                                                      | 1.28                                                     |                                                                                        |                                                                                        |                                                                                               |                                                                                               | 1                                                                              | 1                                                                              | 3422    | 6780           | staufen, RNA binding protein (Drosophila)                        | RNA binding;Transporter activity     | Endoplasmic reticulum | RNA binding protein;Transport/cargo protein | Protein metabolism                                               | DSRM          | Yes                      |  |
| DNAJC25-GNG10 | 552891    | DNAJC25-GNG10 protein precursor                                           | NP_004116.2       | 2          | 1                 | 1          | 2      | 1.3                                                      | 1.24                                                     |                                                                                        |                                                                                        |                                                                                               |                                                                                               | 1                                                                              | 1                                                                              |         |                |                                                                  |                                      |                       |                                             |                                                                  |               |                          |  |
| ARID1A        | 8289      | AT-rich interactive domain-containing protein 1A isoform a                | NP_006006.3       | 4          | 6                 | 6          | 14     | 1.3                                                      | 1.23                                                     | 14.52                                                                                  | 5.95                                                                                   | 48.8                                                                                          | 18.1                                                                                          | 6                                                                              | 6                                                                              | 4319    | 8289           | AT rich interactive domain 1A (SWI-like)                         | RNA binding                          | Cytoplasm             | RNA binding protein                         | Regulation of nucleobase, nucleoside and nucleic acid metabolism | BRIGHT        | Yes                      |  |
| NOP2          | 4839      | probable 28S rRNA (cytosine(4447)-C(5))-methyltransferase isoform 3       | NP_001245238.1    | 4          | 19                | 19         | 56     | 1.3                                                      | 1.23                                                     | 2.65                                                                                   | 3.25                                                                                   | 19.8                                                                                          | 23                                                                                            | 32                                                                             | 32                                                                             | 1244    | 4839           | nucleolar protein 1, 120kDa                                      | Molecular function unknown           | Nucleolus             | Unclassified                                | Regulation of cell cycle;Cell proliferation                      | -             | Yes                      |  |
| ATP6AP1       | 537       | V-type proton ATPase subunit S1 precursor                                 | NP_001174.2       | 1          | 2                 | 2          | 5      | 1.3                                                      | 1.22                                                     | 0.92                                                                                   | 7.72                                                                                   | 2.1                                                                                           | 16.4                                                                                          | 3                                                                              | 3                                                                              | 2184    | 537            | ATPase, H+-transporting, lysosomal accessory protein 1           | Transporter activity                 | -                     | Transport/cargo protein                     | Transport                                                        | TM            | Yes                      |  |

Supplementary Table S1. List of quantified proteins in OKF6/TERT1-Smoke cells  
 Raingopaln *et al.*, 2017. Role of protein kinase N2 (PKN2) in cigarette smoke-mediated oncogenic transformation of oral cells

| Gene Symbol | Gene ID | Protein Description                                                         | Protein Accession | # Proteins | # Unique Peptides | # Peptides | # PSMs | OKF6/TERT1-Smoke/<br>OKF6/TERT1-Parental<br>(130/126) R1 | OKF6/TERT1-Smoke/<br>OKF6/TERT1-Parental<br>(128/127) R2 | Ratio Standard Errors [%]:<br>OKF6/TERT1-Smoke/<br>OKF6/TERT1-Parental<br>(130/126) R1 | Ratio Standard Errors [%]:<br>OKF6/TERT1-Smoke/<br>OKF6/TERT1-Parental<br>(128/127) R2 | Ratio Variabilities [%]:<br>F13: OKF6/TERT1-<br>Smoke/<br>OKF6/TERT1-Parental<br>(130/126) R1 | Ratio Variabilities [%]:<br>F13: OKF6/TERT1-<br>Smoke/<br>OKF6/TERT1-Parental<br>(128/127) R2 | Ratio Counts: F13:<br>OKF6/TERT1-Smoke/<br>OKF6/TERT1-Parental<br>(130/126) R1 | Ratio Counts: F13:<br>OKF6/TERT1-Smoke/<br>OKF6/TERT1-Parental<br>(128/127) R2 | HPRD ID | Entrez Gene Id | Gene Name                                                                   | Molecular Function                           | Primary Localization                | Molecular Class                 | Biological Process                                                           | Domains                            | Plasma Proteome Database |
|-------------|---------|-----------------------------------------------------------------------------|-------------------|------------|-------------------|------------|--------|----------------------------------------------------------|----------------------------------------------------------|----------------------------------------------------------------------------------------|----------------------------------------------------------------------------------------|-----------------------------------------------------------------------------------------------|-----------------------------------------------------------------------------------------------|--------------------------------------------------------------------------------|--------------------------------------------------------------------------------|---------|----------------|-----------------------------------------------------------------------------|----------------------------------------------|-------------------------------------|---------------------------------|------------------------------------------------------------------------------|------------------------------------|--------------------------|
| NAPA        | 8775    | alpha-soluble NSF attachment protein                                        | NP_003818.2       | 1          | 10                | 10         | 29     | 1.3                                                      | 1.22                                                     | 3.09                                                                                   | 7.82                                                                                   | 16.7                                                                                          | 41                                                                                            | 17                                                                             | 17                                                                             | 4447    | 8775           | N-ethylmaleimide-sensitive factor attachment protein, alpha                 | Receptor signaling complex scaffold activity | Golgi apparatus                     | Adapter molecule                | Transport                                                                    | -                                  | No                       |
| PWP2        | 5822    | periodic tryptophan protein 2 homolog                                       | NP_005040.2       | 2          | 6                 | 6          | 21     | 1.3                                                      | 1.22                                                     | 4.48                                                                                   | 9.43                                                                                   | 18.6                                                                                          | 37.5                                                                                          | 10                                                                             | 10                                                                             | 3279    | 5822           | PWP2 periodic tryptophan protein homolog (yeast)                            | Signal transducer activity                   | Nucleolus                           | Cell cycle control protein      | Cell communication; Signal transduction                                      | WD40                               | Yes                      |
| FEN1        | 2237    | flap endonuclease 1                                                         | NP_004102.1       | 1          | 12                | 12         | 40     | 1.3                                                      | 1.2                                                      | 2.99                                                                                   | 4.96                                                                                   | 18                                                                                            | 27.1                                                                                          | 21                                                                             | 20                                                                             | 2670    | 2237           | flap structure-specific endonuclease 1                                      | Deoxyribonuclease activity                   | Nucleus                             | Deoxyribonuclease               | Regulation of nucleobase, nucleoside, nucleotide and nucleic acid metabolism | XPG/HHH2;CC                        | Yes                      |
| FTS1        | 24140   | putative tRNA (cytidine(32) guanosine(34)-2'-O)-methyltransferase isoform a | NP_036412.1       | 3          | 3                 | 3          | 5      | 1.3                                                      | 1.17                                                     | 6.51                                                                                   | 6.56                                                                                   | 14.7                                                                                          | 13.4                                                                                          | 3                                                                              | 3                                                                              | 6568    | 24140          | FtsJ homolog 1 (E. coli)                                                    | Methyltransferase activity                   | Nucleolus                           | Enzyme: Methyltransferase       | Regulation of nucleobase, nucleoside, nucleotide and nucleic acid metabolism | -                                  | Yes                      |
| TRA2B       | 6434    | transformer-2 protein homolog beta isoform 1                                | NP_004584.1       | 2          | 5                 | 7          | 16     | 1.3                                                      | 1.16                                                     | 5.78                                                                                   | 10.55                                                                                  | 22.8                                                                                          | 38.1                                                                                          | 9                                                                              | 9                                                                              | 4097    | 6434           | splicing factor, arginine/serine-rich 10(transformer 2 homolog, Drosophila) | RNA binding                                  | Nucleus                             | RNA binding protein             | Regulation of nucleobase, nucleoside, nucleotide and nucleic acid metabolism | RRM                                | Yes                      |
| TOP1        | 7150    | DNA topoisomerase 1                                                         | NP_003277.1       | 3          | 18                | 18         | 46     | 1.3                                                      | 1.16                                                     | 2.62                                                                                   | 4.22                                                                                   | 18.2                                                                                          | 26.4                                                                                          | 28                                                                             | 28                                                                             | 535     | 7150           | topoisomerase (DNA) I                                                       | DNA topoisomerase activity                   | Nucleus                             | Enzyme: Topoisomerase           | Regulation of nucleobase, nucleoside, nucleotide and nucleic acid metabolism | CC                                 | Yes                      |
| EHD1        | 10938   | EH domain-containing protein 1 isoform 2                                    | NP_001269374.1    | 2          | 26                | 27         | 91     | 1.3                                                      | 1.14                                                     | 3.58                                                                                   | 4.24                                                                                   | 32                                                                                            | 33.4                                                                                          | 45                                                                             | 45                                                                             | 9325    | 10938          | EH-domain containing 1                                                      | Calcium ion binding                          | Plasma membrane                     | Calcium binding protein         | Cell communication; Signal transduction                                      | EH                                 | Yes                      |
| FKBP10      | 60681   | peptidyl-prolyl cis-trans isomerase FKBP10 precursor                        | NP_068758.3       | 2          | 7                 | 7          | 23     | 1.3                                                      | 1.13                                                     | 1.87                                                                                   | 2.27                                                                                   | 8.1                                                                                           | 8.5                                                                                           | 11                                                                             | 11                                                                             | 9522    | 60681          | FK506 binding protein 10, 65 kDa                                            | Isomerase activity                           | Endoplasmic reticulum               | Unclassified                    | Protein folding                                                              | SP;EF                              | Yes                      |
| ACAD8       | 27034   | isobutyryl-CoA dehydrogenase, mitochondrial                                 | NP_055199.1       | 1          | 2                 | 2          | 6      | 1.3                                                      | 1.11                                                     | 19.83                                                                                  | 14.09                                                                                  | 47                                                                                            | 27.6                                                                                          | 3                                                                              | 3                                                                              | 11985   | 27034          | acyl-Coenzyme A dehydrogenase family, member 8                              | Catalytic activity                           | Mitochondrion                       | Enzyme: Dehydrogenase           | Metabolism; Energy pathways                                                  | -                                  | Yes                      |
| LCMT1       | 51451   | leucine carboxyl methyltransferase 1 isoform a                              | NP_057393.2       | 2          | 2                 | 2          | 3      | 1.3                                                      | 1.1                                                      | 0.96                                                                                   | 21.83                                                                                  | 1.8                                                                                           | 35                                                                                            | 2                                                                              | 2                                                                              | 17266   | 51451          | leucine carboxyl methyltransferase 1                                        | Methyltransferase activity                   | -                                   | Enzyme: Methyltransferase       | Protein modification; Metabolism; Energy pathways                            | -                                  | Yes                      |
| CHD2        | 1106    | chromodomain-helicase-DNA binding protein 2 isoform 1                       | NP_001262.3       | 2          | 4                 | 6          | 9      | 1.3                                                      | 1                                                        | 0.97                                                                                   | 5.82                                                                                   | 2.5                                                                                           | 11.7                                                                                          | 4                                                                              | 4                                                                              | 3669    | 1106           | chromodomain helicase DNA binding protein 2                                 | DNA binding                                  | Nucleus                             | DNA binding protein             | Regulation of nucleobase, nucleoside, nucleotide and nucleic acid metabolism | CHROMO;DEXDc;HELIC;CC              | Yes                      |
| AQR         | 9716    | intron-binding protein aquarius                                             | NP_055506.1       | 1          | 3                 | 3          | 5      | 1.3                                                      | 0.94                                                     | 13.61                                                                                  | 8.5                                                                                    | 31.3                                                                                          | 13.9                                                                                          | 3                                                                              | 3                                                                              | 12468   | 9716           | aquarius homolog (mouse)                                                    | Molecular function unknown                   | Nucleus                             | Unclassified                    | Biological processes unknown; RNA metabolism                                 | -                                  | Yes                      |
| ALYREF      | 10189   | THO complex subunit 4                                                       | NP_005773.3       | 1          | 5                 | 5          | 19     | 1.3                                                      | 0.86                                                     | 6.03                                                                                   | 6.64                                                                                   | 26.4                                                                                          | 19                                                                                            | 11                                                                             | 11                                                                             |         |                |                                                                             |                                              |                                     |                                 |                                                                              |                                    |                          |
| REXO4       | 57109   | RNA exonuclease 4 isoform 1                                                 | NP_065118.2       | 4          | 2                 | 2          | 3      | 1.3                                                      | 0.82                                                     | 20.77                                                                                  | 63.08                                                                                  | 39.7                                                                                          | 84.6                                                                                          | 2                                                                              | 2                                                                              | 4239    | 57109          | XPMC2 prevents mitotic catastrophe 2 homolog (Xenopus laevis)               | Translation regulator activity               | Nucleus                             | Translation regulatory protein  | Regulation of nucleobase, nucleoside, nucleotide and nucleic acid metabolism | EXOIII                             | No                       |
| CALR        | 811     | calreticulin precursor                                                      | NP_004334.1       | 1          | 21                | 21         | 171    | 1.29                                                     | 1.55                                                     | 2.96                                                                                   | 2.66                                                                                   | 36.1                                                                                          | 39.1                                                                                          | 84                                                                             | 84                                                                             | 169     | 811            | calreticulin                                                                | Chaperone activity                           | Endoplasmic reticulum               | Chaperone                       | Protein metabolism                                                           | SP;CC                              | Yes                      |
| CALU        | 813     | calumenin isoform c precursor                                               | NP_001186600.1    | 5          | 10                | 10         | 22     | 1.29                                                     | 1.49                                                     | 5.26                                                                                   | 2.68                                                                                   | 27.7                                                                                          | 16.1                                                                                          | 16                                                                             | 16                                                                             | 4569    | 813            | calumenin                                                                   | Calcium ion binding                          | Endoplasmic reticulum               | Calcium binding protein         | Cell communication; Signal transduction                                      | EF;SP                              | Yes                      |
| HARS        | 3035    | histidine-tRNA ligase, cytoplasmic isoform 1                                | NP_002100.2       | 7          | 14                | 19         | 79     | 1.29                                                     | 1.48                                                     | 2.84                                                                                   | 2.66                                                                                   | 20.2                                                                                          | 21.9                                                                                          | 30                                                                             | 30                                                                             | 827     | 3035           | histidyl-tRNA synthetase                                                    | Ligase activity                              | Cytoplasm                           | Enzyme: Ligase                  | Protein metabolism                                                           | CC                                 | Yes                      |
| CTTN        | 2017    | src substrate cortactin isoform a                                           | NP_005222.2       | 3          | 28                | 28         | 84     | 1.29                                                     | 1.45                                                     | 2.64                                                                                   | 4.41                                                                                   | 22.9                                                                                          | 44.4                                                                                          | 44                                                                             | 44                                                                             | 1268    | 2017           | cortactin                                                                   | Cytoskeletal protein binding                 | Cytoplasm                           | Cytoskeletal associated protein | Cell growth and/or maintenance                                               | SH3;CC;HS1_rep                     | Yes                      |
| LAMA3       | 3909    | laminin subunit alpha-3 isoform 1 precursor                                 | NP_937762.2       | 5          | 69                | 69         | 365    | 1.29                                                     | 1.43                                                     | 1.78                                                                                   | 2.26                                                                                   | 30.9                                                                                          | 44.2                                                                                          | 172                                                                            | 172                                                                            | 2883    | 3909           | laminin, alpha 3                                                            | Extracellular matrix structural constituent  | Extracellular                       | Extracellular matrix protein    | Cell growth and/or maintenance                                               | EGFLAM1;LAMG;SP;CC;LAMNT;LAMB;TSPN | Yes                      |
| SELK        | 58515   | selenoprotein K                                                             | NP_067060.2       | 1          | 2                 | 2          | 3      | 1.29                                                     | 1.38                                                     |                                                                                        |                                                                                        |                                                                                               |                                                                                               | 1                                                                              | 1                                                                              |         |                |                                                                             |                                              |                                     |                                 |                                                                              |                                    |                          |
| FERMT2      | 10979   | fermatin family homolog 2 isoform 2                                         | NP_001128471.1    | 3          | 5                 | 6          | 16     | 1.29                                                     | 1.35                                                     | 5.04                                                                                   | 2.55                                                                                   | 14.7                                                                                          | 7.7                                                                                           | 5                                                                              | 5                                                                              | 6374    | 10979          | pleckstrin homology domain containing family C (with FERM domain) member 1  | Structural constituent of cytoskeleton       | Plasma membrane; Nucleus; Cytoplasm | Cytoskeletal protein            | Cell growth and/or maintenance                                               | PH;CC;B41                          | Yes                      |
| OGFR        | 11054   | opioid growth factor receptor                                               | NP_031372.2       | 1          | 14                | 14         | 28     | 1.29                                                     | 1.35                                                     | 5.27                                                                                   | 4.85                                                                                   | 25.9                                                                                          | 24.9                                                                                          | 14                                                                             | 14                                                                             | 8404    | 11054          | opioid growth factor receptor                                               | Ligand-dependent nuclear receptor activity   | Nucleus; Cytoplasm                  | Nuclear receptor                | Cell communication; Signal transduction                                      | -                                  | Yes                      |
| GTF2E2      | 2961    | transcription initiation factor IIE subunit beta                            | NP_002086.1       | 1          | 3                 | 3          | 4      | 1.29                                                     | 1.32                                                     | 16.97                                                                                  | 17.49                                                                                  | 31.8                                                                                          | 33.5                                                                                          | 2                                                                              | 2                                                                              | 1800    | 2961           | general transcription factor IIE, polypeptide 2, beta 34kDa                 | Transcription factor activity                | Nucleus                             | Transcription factor            | Regulation of nucleobase, nucleoside, nucleotide and nucleic acid metabolism | HLH                                | Yes                      |
| ACAT1       | 38      | acetyl-CoA acetyltransferase, mitochondrial precursor                       | NP_000010.1       | 1          | 18                | 18         | 53     | 1.29                                                     | 1.32                                                     | 3.01                                                                                   | 7.35                                                                                   | 20                                                                                            | 52.6                                                                                          | 26                                                                             | 26                                                                             | 1946    | 38             | acetyl-Coenzyme A acetyltransferase (acetoacetyl Coenzyme A thioester)      | Acyltransferase activity                     | Mitochondrion                       | Enzyme: Acyltransferase         | Metabolism; Energy pathways                                                  | SP                                 | Yes                      |

Supplementary Table S1. List of quantified proteins in OKF6/TERT1-Smoke cells  
 Raigopaln *et al.*, 2017. Role of protein kinase N2 (PKN2) in cigarette smoke-mediated oncogenic transformation of oral cells

| Gene Symbol | Gene ID | Protein Description                                                  | Protein Accession | # Proteins | # Unique Peptides | # Peptides | # PSMs | OKF6/TERT1-Smoke/<br>OKF6/TERT1-Parental<br>(130/126) R1 | OKF6/TERT1-Smoke/<br>OKF6/TERT1-Parental<br>(128/127) R2 | Ratio Standard Errors [%]:<br>OKF6/TERT1-Smoke/<br>OKF6/TERT1-Parental<br>(130/126) R1 | Ratio Standard Errors [%]:<br>OKF6/TERT1-Smoke/<br>OKF6/TERT1-Parental<br>(128/127) R2 | Ratio Variabilities [%]:<br>F13: OKF6/TERT1-<br>Smoke/<br>OKF6/TERT1-Parental<br>(130/126) R1 | Ratio Variabilities [%]:<br>F13: OKF6/TERT1-<br>Smoke/<br>OKF6/TERT1-Parental<br>(128/127) R2 | Ratio Counts: F13:<br>OKF6/TERT1-Smoke/<br>OKF6/TERT1-Parental<br>(130/126) R1 | Ratio Counts: F13:<br>OKF6/TERT1-Smoke/<br>OKF6/TERT1-Parental<br>(128/127) R2 | HPRD ID | Entrez Gene Id | Gene Name                                                              | Molecular Function                   | Primary Localization   | Molecular Class                         | Biological Process                                               | Domains    | Plasma Proteome Database |
|-------------|---------|----------------------------------------------------------------------|-------------------|------------|-------------------|------------|--------|----------------------------------------------------------|----------------------------------------------------------|----------------------------------------------------------------------------------------|----------------------------------------------------------------------------------------|-----------------------------------------------------------------------------------------------|-----------------------------------------------------------------------------------------------|--------------------------------------------------------------------------------|--------------------------------------------------------------------------------|---------|----------------|------------------------------------------------------------------------|--------------------------------------|------------------------|-----------------------------------------|------------------------------------------------------------------|------------|--------------------------|
| IVD         | 3712    | isovaleryl-CoA dehydrogenase, mitochondrial isoform 1 precursor      | NP_002216.2       | 2          | 7                 | 7          | 17     | 1.29                                                     | 1.29                                                     | 5.28                                                                                   | 10.44                                                                                  | 20.6                                                                                          | 42.1                                                                                          | 9                                                                              | 9                                                                              | 9516    | 3712           | isovaleryl Coenzyme A dehydrogenase                                    | Catalytic activity                   | Mitochondrion          | Enzyme: Dehydrogenase                   | Metabolism;Energy pathways                                       | -          | Yes                      |
| NDRG3       | 57446   | protein NDRG3 isoform a                                              | NP_114402.1       | 2          | 7                 | 7          | 16     | 1.29                                                     | 1.29                                                     | 4.27                                                                                   | 8.17                                                                                   | 15.7                                                                                          | 30.4                                                                                          | 8                                                                              | 8                                                                              | 12007   | 57446          | NDRG family member 3                                                   | Molecular function unknown           | Cytoplasm              | Unclassified;Cell cycle control protein | Cell communication;Signal transduction;Cell differentiation      | -          | No                       |
| EIF1AY      | 9086    | eukaryotic translation initiation factor 1A, Y-chromosomal isoform 1 | NP_004672.2       | 3          | 6                 | 6          | 13     | 1.29                                                     | 1.28                                                     | 2.18                                                                                   | 12.73                                                                                  | 6.9                                                                                           | 41.6                                                                                          | 6                                                                              | 6                                                                              | 2455    | 9086           | eukaryotic translation initiation factor 1A, Y-linked                  | Translation regulator activity       | -                      | Translation regulatory protein          | Protein metabolism                                               | -          | No                       |
| XRCC1       | 7515    | DNA repair protein XRCC1                                             | NP_006288.2       | 1          | 7                 | 7          | 9      | 1.29                                                     | 1.27                                                     | 6.42                                                                                   | 4.75                                                                                   | 22.3                                                                                          | 16                                                                                            | 7                                                                              | 7                                                                              | 1909    | 7515           | X-ray repair complementing defective repair in Chinese hamster cells 1 | DNA repair protein                   | Nucleus                | DNA repair protein                      | DNA repair                                                       | BRCT;NLS   | Yes                      |
| CNPY2       | 10330   | protein canopy homolog 2 isoform 1 precursor                         | NP_055070.1       | 2          | 7                 | 7          | 16     | 1.29                                                     | 1.25                                                     | 9.55                                                                                   | 8.85                                                                                   | 38.3                                                                                          | 34.1                                                                                          | 9                                                                              | 9                                                                              | 12056   | 10330          | transmembrane protein 4                                                | Protein binding                      | Integral to membrane   | Integral membrane protein               | Cell growth and/or maintenance                                   | SP         | Yes                      |
| MIA3        | 375056  | melanoma inhibitory activity protein 3 isoform 1 precursor           | NP_940953.2       | 2          | 16                | 16         | 30     | 1.29                                                     | 1.22                                                     | 3.46                                                                                   | 4.17                                                                                   | 19.1                                                                                          | 21.8                                                                                          | 18                                                                             | 18                                                                             | 18918   | 375056         | melanoma inhibitory activity family, member 3                          | Molecular function unknown           | -                      | Unclassified                            | Biological process unknown                                       | SP;SH3;CC  | Yes                      |
| ZNF326      | 284695  | DBRD complex subunit ZNF326 isoform 1                                | NP_892021.1       | 1          | 5                 | 5          | 15     | 1.29                                                     | 1.21                                                     | 2.19                                                                                   | 4.31                                                                                   | 7.5                                                                                           | 13.9                                                                                          | 7                                                                              | 7                                                                              | 15774   | 284695         | zinc finger protein 326                                                | DNA binding                          | Nucleolus              | DNA binding protein                     | Regulation of nucleobase, nucleoside and nucleic acid metabolism | ZNFCC;CC   | No                       |
| POLD2       | 5425    | DNA polymerase delta subunit 2 isoform 2                             | NP_006221.2       | 2          | 2                 | 2          | 3      | 1.29                                                     | 1.19                                                     | 6.56                                                                                   | 4.94                                                                                   | 12                                                                                            | 8.3                                                                                           | 2                                                                              | 2                                                                              | 15982   | 5425           | polymerase (DNA directed), delta 2, regulator subunit 50kDa            | DNA-directed DNA polymerase activity | Nucleus                | DNA polymerase                          | Regulation of nucleobase, nucleoside and nucleic acid metabolism | -          | Yes                      |
| RPL39       | 6170    | 60S ribosomal protein L39                                            | NP_000991.1       | 1          | 1                 | 1          | 2      | 1.29                                                     | 1.18                                                     | 1.57                                                                                   | 7.68                                                                                   | 2.9                                                                                           | 12.8                                                                                          | 2                                                                              | 2                                                                              | 3546    | 6170           | ribosomal protein L39                                                  | Structural constituent of ribosome   | Ribosome               | Ribosomal subunit                       | Protein metabolism                                               | -          | No                       |
| ACSL3       | 2181    | long-chain-fatty-acid-CoA ligase 3                                   | NP_004448.2       | 1          | 28                | 31         | 121    | 1.29                                                     | 1.14                                                     | 2.55                                                                                   | 4.61                                                                                   | 24.3                                                                                          | 39.6                                                                                          | 53                                                                             | 53                                                                             | 3845    | 2181           | acyl-CoA synthetase long-chain family member 3                         | CoA-ligase activity                  | Peroxisome             | Enzyme: Ligase                          | Fatty acid metabolism                                            | TM         | Yes                      |
| NEURL1      | 9148    | E3 ubiquitin-protein ligase NEURL1                                   | NP_004201.3       | 1          | 1                 | 1          | 1      | 1.29                                                     | 1.13                                                     |                                                                                        |                                                                                        |                                                                                               |                                                                                               | 1                                                                              | 1                                                                              |         |                |                                                                        |                                      |                        |                                         |                                                                  |            |                          |
| ITPKC       | 80271   | inositol 1,4,5-trisphosphate 3-kinase C                              | NP_079470.1       | 1          | 7                 | 7          | 13     | 1.29                                                     | 1.12                                                     | 2.76                                                                                   | 7.76                                                                                   | 8.7                                                                                           | 21.6                                                                                          | 6                                                                              | 6                                                                              | 9400    | 80271          | inositol 1,4,5-trisphosphate 3-kinase C                                | Lipid kinase activity                | Cytoplasm              | Lipid Kinase                            | Cell communication;Signal transduction                           | PIPKc      | Yes                      |
| DBNL        | 28988   | drebrin-like protein isoform b                                       | NP_001014436.1    | 2          | 1                 | 13         | 45     | 1.29                                                     | 1.1                                                      |                                                                                        |                                                                                        |                                                                                               |                                                                                               | 1                                                                              | 1                                                                              | 6588    | 28988          | drebrin-like                                                           | Kinase regulator activity            | Actin cytoskeleton     | Adapter molecule                        | Signal transduction                                              | ADF;CC;SH3 | Yes                      |
| HACL1       | 26061   | 2-hydroxyacyl-CoA lyase 1 isoform a                                  | NP_036392.2       | 4          | 5                 | 5          | 7      | 1.29                                                     | 1.09                                                     | 14.14                                                                                  | 7.35                                                                                   | 47                                                                                            | 19.8                                                                                          | 6                                                                              | 6                                                                              | 9183    | 26061          | None                                                                   | Lyase activity                       | Peroxisome             | Enzyme: Lyase                           | Metabolism;Energy pathways                                       | -          | Yes                      |
| UBAP1       | 51271   | ubiquitin-associated protein 1 isoform 2                             | NP_001164672.1    | 3          | 3                 | 3          | 6      | 1.29                                                     | 1.07                                                     | 4.7                                                                                    | 6.22                                                                                   | 10.5                                                                                          | 11.6                                                                                          | 3                                                                              | 3                                                                              | 15597   | 51271          | ubiquitin associated protein 1                                         | Molecular function unknown           | -                      | Unclassified                            | Biological process unknown                                       | CC         | No                       |
| BOP1        | 23246   | ribosome biogenesis protein BOP1                                     | NP_056016.1       | 1          | 6                 | 6          | 16     | 1.29                                                     | 1.05                                                     | 5.66                                                                                   | 10.2                                                                                   | 20.9                                                                                          | 30.9                                                                                          | 8                                                                              | 8                                                                              | 16558   | 23246          | block of proliferation 1                                               | Molecular function unknown           | Nucleolus              | Unclassified                            | Biological process unknown                                       | WD40       | Yes                      |
| HSDL2       | 84263   | hydroxysteroid dehydrogenase-like protein 2 isoform 1                | NP_115679.2       | 2          | 13                | 13         | 34     | 1.29                                                     | 1.05                                                     | 3.44                                                                                   | 5.8                                                                                    | 19                                                                                            | 26.3                                                                                          | 18                                                                             | 18                                                                             | 13679   | 84263          | hydroxysteroid dehydrogenase like 2                                    | Molecular function unknown           | -                      | Unclassified                            | Biological process unknown                                       | -          | Yes                      |
| CCDC137     | 339230  | coiled-coil domain-containing protein 137                            | NP_954981.1       | 1          | 2                 | 2          | 2      | 1.29                                                     | 1.04                                                     | 10.07                                                                                  | 4.97                                                                                   | 18.6                                                                                          | 7.4                                                                                           | 2                                                                              | 2                                                                              | 11313   | 339230         | None                                                                   | Molecular function unknown           | -                      | Unclassified                            | Biological process unknown                                       | CC         | No                       |
| LANCL2      | 55915   | lanC-like protein 2                                                  | NP_061167.1       | 1          | 1                 | 1          | 1      | 1.29                                                     | 1.01                                                     |                                                                                        |                                                                                        |                                                                                               |                                                                                               | 1                                                                              | 1                                                                              | 13956   | 55915          | LanC lantibiotic synthetase component C-like 2(bacterial)              | Molecular function unknown           | Plasma membrane        | Unclassified                            | Biological process unknown                                       | -          | Yes                      |
| HNRNPC      | 3183    | heterogeneous nuclear ribonucleoproteins C1/C2 isoform a             | NP_112604.2       | 2          | 1                 | 15         | 245    | 1.29                                                     | 1.01                                                     |                                                                                        |                                                                                        |                                                                                               |                                                                                               | 1                                                                              | 1                                                                              | 1243    | 3183           | heterogeneous nuclear ribonucleoprotein C1/C2                          | RNA binding                          | Nucleus                | RNA binding protein                     | Regulation of nucleobase, nucleoside and nucleic acid metabolism | RRMLZ;CC   | Yes                      |
| C2orf47     | 79568   | uncharacterized protein C2orf47, mitochondrial precursor             | NP_078796.2       | 1          | 5                 | 5          | 10     | 1.29                                                     | 0.91                                                     | 5.68                                                                                   | 2.92                                                                                   | 18.1                                                                                          | 6.5                                                                                           | 6                                                                              | 6                                                                              | 7994    | 79568          | None                                                                   | Molecular function unknown           | -                      | Unclassified                            | Biological process unknown                                       | -          | No                       |
| TNIP1       | 10318   | TNFAIP3-interacting protein 1 isoform 3                              | NP_001239320.1    | 6          | 2                 | 2          | 2      | 1.29                                                     | 0.89                                                     | 20.41                                                                                  | 12.11                                                                                  | 38.6                                                                                          | 15.3                                                                                          | 2                                                                              | 2                                                                              | 9216    | 10318          | TNFAIP3 interacting protein 1                                          | Cytoskeletal anchoring activity      | Cytoplasm              | Anchor protein                          | Cell growth and/or maintenance                                   | CC         | Yes                      |
| PCIF1       | 63935   | phosphorylated CTD-interacting factor 1                              | NP_071387.1       | 1          | 1                 | 1          | 6      | 1.29                                                     | 0.8                                                      | 8.22                                                                                   | 13.05                                                                                  | 18.5                                                                                          | 18.1                                                                                          | 3                                                                              | 3                                                                              | 12779   | 63935          | chromosome 20 open reading frame 67                                    | Transcription regulator activity     | Nucleus                | Transcription regulatory protein        | Regulation of nucleobase, nucleoside and nucleic acid metabolism | WW;NLS     | Yes                      |
| RTN4P1      | 84816   | reticulon-4-interacting protein 1, mitochondrial precursor           | NP_116119.2       | 1          | 1                 | 1          | 2      | 1.29                                                     | 0.76                                                     |                                                                                        |                                                                                        |                                                                                               |                                                                                               | 1                                                                              | 1                                                                              | 18008   | 84816          | reticulon 4 interacting protein 1                                      | Catalytic activity                   | Mitochondrion          | Enzyme: Dehydrogenase                   | Metabolism;Energy pathways                                       | -          | No                       |
| BPI         | 671     | bactericidal permeability-increasing protein precursor               | NP_001716.2       | 1          | 1                 | 1          | 2      | 1.29                                                     | 0.69                                                     |                                                                                        |                                                                                        |                                                                                               |                                                                                               | 1                                                                              | 1                                                                              | 174     | 671            | bactericidal/permeability-increasing protein                           | Defense/immunity protein activity    | Secretory granule      | Integral membrane protein               | Immune response                                                  | SP;TM      | Yes                      |
| ATP5D       | 513     | ATP synthase subunit delta, mitochondrial precursor                  | NP_001678.1       | 1          | 2                 | 2          | 6      | 1.29                                                     | 0.57                                                     | 1.39                                                                                   | 24.89                                                                                  | 3.1                                                                                           | 24.9                                                                                          | 3                                                                              | 3                                                                              | 4397    | 513            | ATP synthase, H-transporting, mitochondrial F1complex, delta subunit   | ATPase activity                      | Mitochondrial membrane | ATPase                                  | Ion transport                                                    | CC;SP      | Yes                      |
| MYL4        | 4635    | myosin light chain 4                                                 | NP_002467.1       | 1          | 1                 | 1          | 2      | 1.29                                                     | 0.55                                                     |                                                                                        |                                                                                        |                                                                                               |                                                                                               | 1                                                                              | 1                                                                              | 1176    | 4635           | myosin, light polypeptide 4, alkali; atrial, embryonic                 | Structural molecule activity         | Cytoplasm              | Structural protein                      | Cell growth and/or maintenance                                   | -          | Yes                      |

Supplementary Table S1. List of quantified proteins in OKF6/TERT1-Smoke cells  
 Raingonalan *et al.*, 2017. Role of protein kinase N2 (PKN2) in cigarette smoke-mediated oncogenic transformation of oral cells

| Gene Symbol | Gene ID | Protein Description                                                                        | Protein Accession | # Proteins | # Unique Peptides | # Peptides | # PSMs | OKF6/TERT1-Smoke/OKF6/TERT1-Parental (130/126) R1 | OKF6/TERT1-Smoke/OKF6/TERT1-Parental (128/127) R2 | Ratio Standard Errors [%]: OKF6/TERT1-Smoke/OKF6/TERT1-Parental (130/126) R1 | Ratio Standard Errors [%]: OKF6/TERT1-Smoke/OKF6/TERT1-Parental (128/127) R2 | Ratio Variabilities [%]: F13: OKF6/TERT1-Smoke/OKF6/TERT1-Parental (130/126) R1 | Ratio Variabilities [%]: F13: OKF6/TERT1-Smoke/OKF6/TERT1-Parental (128/127) R2 | Ratio Counts: F13: OKF6/TERT1-Smoke/OKF6/TERT1-Parental (130/126) R1 | Ratio Counts: F13: OKF6/TERT1-Smoke/OKF6/TERT1-Parental (128/127) R2 | HPRD ID | Entrez Gene Id | Gene Name                                                                      | Molecular Function                                                      | Primary Localization            | Molecular Class                                       | Biological Process                                                      | Domains                   | Plasma Proteome Database |
|-------------|---------|--------------------------------------------------------------------------------------------|-------------------|------------|-------------------|------------|--------|---------------------------------------------------|---------------------------------------------------|------------------------------------------------------------------------------|------------------------------------------------------------------------------|---------------------------------------------------------------------------------|---------------------------------------------------------------------------------|----------------------------------------------------------------------|----------------------------------------------------------------------|---------|----------------|--------------------------------------------------------------------------------|-------------------------------------------------------------------------|---------------------------------|-------------------------------------------------------|-------------------------------------------------------------------------|---------------------------|--------------------------|
| GTF2H1      | 2965    | general transcription factor IIB subunit 1                                                 | NP_005307.1       | 1          | 2                 | 2          | 4      | 1.28                                              | 1.67                                              | 19.7                                                                         | 26.18                                                                        | 36.9                                                                            | 68.3                                                                            | 2                                                                    | 2                                                                    | 1807    | 2965           | general transcription factor IIB, polypeptide 1, 62kDa                         | Transcription factor activity                                           | Nucleus                         | Transcription factor                                  | Regulation of nucleobase, nucleoside and nucleic acid metabolism        | -                         | Yes                      |
| YTHDC2      | 64848   | probable ATP-dependent RNA helicase YTHDC2                                                 | NP_073739.3       | 1          | 2                 | 2          | 4      | 1.28                                              | 1.55                                              | 11.42                                                                        | 41.28                                                                        | 21                                                                              | 112.5                                                                           | 2                                                                    | 2                                                                    | 11690   | 64848          | YTH domain containing 2                                                        | Molecular function unknown                                              | Nucleus                         | Unclassified                                          | Biological process unknown                                              | R3H,DEXDcAN,K,HELIC       | No                       |
| RALY        | 22913   | RNA-binding protein Raly isoform 2                                                         | NP_031393.2       | 2          | 16                | 16         | 47     | 1.28                                              | 1.53                                              | 3.55                                                                         | 3.62                                                                         | 23.5                                                                            | 28.8                                                                            | 26                                                                   | 26                                                                   | 11480   | 22913          | RNA binding protein (autoantigenic hnRNP-associated with lethal yellow)        | RNA binding                                                             | Mitochondrion;Nucleus;Cytoplasm | RNA binding protein                                   | Regulation of nucleobase, nucleoside and nucleic acid metabolism        | RRM                       | Yes                      |
| PRMT1       | 3276    | protein arginine N-methyltransferase 1 isoform 1                                           | NP_001527.3       | 5          | 18                | 18         | 70     | 1.28                                              | 1.41                                              | 4.22                                                                         | 5.93                                                                         | 35.7                                                                            | 57.5                                                                            | 41                                                                   | 41                                                                   | 4257    | 3276           | HMT1 hnRNP methyltransferase like 2 (S.cerevisiae)                             | Methyltransferase activity                                              | Nucleus                         | Enzyme: Methyltransferase                             | Metabolism;Energy pathways                                              | -                         | Yes                      |
| CIQBP       | 708     | complement component 1 Q subcomponent-binding protein, mitochondrial precursor             | NP_001203.1       | 1          | 4                 | 4          | 46     | 1.28                                              | 1.41                                              | 6.45                                                                         | 9.43                                                                         | 42                                                                              | 72.5                                                                            | 24                                                                   | 24                                                                   | 3168    | 708            | complement component 1, q subcomponent binding protein                         | Complement receptor activity                                            | Mitochondrion;Nucleus           | Complement receptor                                   | Immune response                                                         | SP                        | Yes                      |
| SEC24A      | 10802   | protein transport protein Sec24A isoform 1                                                 | NP_068817.1       | 2          | 6                 | 7          | 25     | 1.28                                              | 1.37                                              | 6.1                                                                          | 3.6                                                                          | 23.8                                                                            | 14.9                                                                            | 9                                                                    | 9                                                                    | 8456    | 10802          | SEC24 related gene family, member A (S.cerevisiae)                             | Transporter activity                                                    | Endoplasmic reticulum           | Transport/cargo protein                               | Transport                                                               | GEL                       | Yes                      |
| COX5B       | 1329    | cytochrome c oxidase subunit 5B, mitochondrial precursor                                   | NP_001853.2       | 1          | 1                 | 1          | 1      | 1.28                                              | 1.31                                              | 1.31                                                                         | 1.31                                                                         | 1                                                                               | 1                                                                               | 1                                                                    | 1                                                                    | 467     | 1329           | cytochrome c oxidase subunit 5b                                                | Oxidoreductase activity                                                 | Mitochondrion                   | Enzyme: Oxidoreductase                                | Metabolism;Energy pathways                                              | -                         | Yes                      |
| Sep-8       | 23176   | septin-8 isoform a                                                                         | NP_001092281.1    | 7          | 7                 | 9          | 56     | 1.28                                              | 1.29                                              | 1.74                                                                         | 7.99                                                                         | 6.3                                                                             | 29.7                                                                            | 8                                                                    | 8                                                                    |         |                |                                                                                |                                                                         |                                 |                                                       |                                                                         |                           |                          |
| SETD7       | 80854   | histone-lysine N-methyltransferase SETD7 isoform 1                                         | NP_085151.1       | 2          | 3                 | 3          | 5      | 1.28                                              | 1.23                                              | 6.84                                                                         | 17.31                                                                        | 15.2                                                                            | 38                                                                              | 3                                                                    | 3                                                                    | 16226   | 80854          | None                                                                           | Methyltransferase activity                                              | Nucleus                         | Enzyme: Methyltransferase                             | Regulation of nucleobase, nucleoside and nucleic acid metabolism        | MORN,SET                  | Yes                      |
| WDR74       | 54663   | WD repeat-containing protein 74 isoform 1                                                  | NP_060563.2       | 2          | 1                 | 1          | 4      | 1.28                                              | 1.23                                              | 2.55                                                                         | 4.16                                                                         | 4.6                                                                             | 7.3                                                                             | 2                                                                    | 2                                                                    | 8548    | 54663          | WD repeat domain 74                                                            | Molecular function unknown                                              | Nucleus                         | Unclassified                                          | Cell communication;Signal transduction                                  | WD40                      | Yes                      |
| TPR         | 7175    | nucleoprotein TPR                                                                          | NP_003283.2       | 3          | 71                | 71         | 158    | 1.28                                              | 1.22                                              | 1.75                                                                         | 2.35                                                                         | 20.9                                                                            | 26.6                                                                            | 85                                                                   | 84                                                                   | 8927    | 7175           | translocated promoter region (to activated MET oncogene)                       | Molecular function unknown                                              | Cytoplasm                       | Unclassified                                          | Regulation of nucleobase, nucleoside and nucleic acid metabolism        | CC                        | Yes                      |
| PIK3C2A     | 5286    | phosphatidylinositol 4-phosphate 3-kinase C2 domain-containing subunit alpha               | NP_002636.2       | 1          | 5                 | 5          | 11     | 1.28                                              | 1.2                                               | 9.87                                                                         | 2.87                                                                         | 28.9                                                                            | 7.7                                                                             | 5                                                                    | 5                                                                    | 4672    | 5286           | phosphoinositide 3-kinase, class 2, alpha polypeptide                          | Lipid kinase activity                                                   | Cytosol                         | Lipid Kinase                                          | Cell communication;Signal transduction                                  | PI3K2,PEKKA,PEBKX,PK,C2   | Yes                      |
| SCRN1       | 9805    | secernin-1 isoform b                                                                       | NP_001138986.1    | 3          | 8                 | 8          | 29     | 1.28                                              | 1.12                                              | 5.27                                                                         | 5.19                                                                         | 26.5                                                                            | 22.8                                                                            | 15                                                                   | 15                                                                   | 15304   | 9805           | secernin 1                                                                     | Peptidase activity                                                      | Cytoplasm                       | Protease                                              | Immune response                                                         | -                         | Yes                      |
| PPP2R1B     | 5519    | serine/threonine-protein phosphatase 2A 65 kDa regulatory subunit A beta isoform isoform a | NP_002707.3       | 5          | 4                 | 11         | 41     | 1.28                                              | 1.11                                              | 2.08                                                                         | 3.3                                                                          | 7.1                                                                             | 9.7                                                                             | 7                                                                    | 7                                                                    | 4384    | 5519           | protein phosphatase 2 (formerly 2A), regulatory subunit A (PP2A), beta isoform | Protein serine/threonine phosphatase activity;Enzyme regulator activity | Cytoplasm                       | Regulatory/other subunit;Serine/threonine phosphatase | Cell communication;Signal transduction;Regulation of cell proliferation | HEAT                      | Yes                      |
| EIF2A       | 83939   | eukaryotic translation initiation factor 2A                                                | NP_114414.2       | 1          | 15                | 15         | 41     | 1.28                                              | 1.09                                              | 2.61                                                                         | 4.37                                                                         | 15.7                                                                            | 22.6                                                                            | 22                                                                   | 22                                                                   | 11739   | 83939          | None                                                                           | Translation regulator activity                                          | Cytoplasm                       | Translation regulatory protein                        | Protein metabolism                                                      | CC                        | Yes                      |
| NUDCD1      | 84955   | nudC domain-containing protein 1 isoform 1                                                 | NP_116258.2       | 2          | 10                | 10         | 26     | 1.28                                              | 1.06                                              | 5.21                                                                         | 10.6                                                                         | 24.5                                                                            | 42.4                                                                            | 13                                                                   | 13                                                                   | 16200   | 84955          | NudC domain containing 1                                                       | Molecular function unknown                                              | -                               | Unclassified                                          | Biological process unknown                                              | -                         | Yes                      |
| RPL13       | 6137    | 60S ribosomal protein L13 isoform 1                                                        | NP_000968.2       | 3          | 14                | 14         | 47     | 1.28                                              | 1.01                                              | 6.04                                                                         | 6.39                                                                         | 39.3                                                                            | 32.5                                                                            | 24                                                                   | 24                                                                   | 6428    | 6137           | ribosomal protein L13                                                          | RNA binding                                                             | Ribosome                        | Ribonucleoprotein                                     | Protein metabolism                                                      | -                         | Yes                      |
| TCEB3       | 6924    | transcription elongation factor B polypeptide 3                                            | NP_003189.2       | 1          | 3                 | 3          | 5      | 1.28                                              | 0.95                                              | 1.99                                                                         | 6.7                                                                          | 3.6                                                                             | 9                                                                               | 2                                                                    | 2                                                                    | 2873    | 6924           | transcription elongation factor B (SII), polypeptide 3 (110kDa, elongin A)     | Transcription regulator activity                                        | Nucleus                         | Transcription regulatory protein                      | Regulation of nucleobase, nucleoside and nucleic acid metabolism        | TFS                       | Yes                      |
| HNRNPL      | 92906   | heterogeneous nuclear ribonucleoprotein L-like isoform 1                                   | NP_612403.2       | 2          | 2                 | 3          | 7      | 1.28                                              | 0.91                                              |                                                                              |                                                                              |                                                                                 |                                                                                 | 1                                                                    | 1                                                                    |         |                |                                                                                |                                                                         |                                 |                                                       |                                                                         |                           |                          |
| COBL1       | 22837   | cordon-bleu protein-like 1 isoform 1                                                       | NP_001265387.1    | 4          | 2                 | 2          | 2      | 1.28                                              | 0.88                                              | 6.77                                                                         | 38.95                                                                        | 12.3                                                                            | 51.2                                                                            | 2                                                                    | 2                                                                    | 10844   | 22837          | COBL-like 1                                                                    | Molecular function unknown                                              | -                               | Unclassified                                          | Biological process unknown                                              | WH2                       | Yes                      |
| SOX15       | 6665    | protein SOX-15                                                                             | NP_008873.1       | 1          | 2                 | 2          | 3      | 1.28                                              | 0.72                                              |                                                                              |                                                                              |                                                                                 |                                                                                 | 1                                                                    | 1                                                                    | 3191    | 6665           | SRY (sex determining region Y)-box 15                                          | Transcription factor activity                                           | Nucleus                         | Transcription factor                                  | Regulation of nucleobase, nucleoside and nucleic acid metabolism        | HMG                       | Yes                      |
| MED24       | 9862    | mediator of RNA polymerase II transcription subunit 24 isoform 1                           | NP_055630.2       | 2          | 1                 | 1          | 2      | 1.28                                              | 0.7                                               |                                                                              |                                                                              |                                                                                 |                                                                                 | 1                                                                    | 1                                                                    | 6107    | 9862           | thyroid hormone receptor associated protein 4                                  | Transcription regulator activity                                        | Nucleus                         | Transcription regulatory protein                      | Regulation of nucleobase, nucleoside and nucleic acid metabolism        | -                         | Yes                      |
| SLC9A3R2    | 9351    | Na(+)/H(+) exchange regulatory cofactor NHE-RF2 isoform a                                  | NP_001123484.1    | 2          | 1                 | 1          | 4      | 1.27                                              | 1.61                                              | 2.63                                                                         | 2.31                                                                         | 4.7                                                                             | 5.3                                                                             | 2                                                                    | 2                                                                    | 5946    | 9351           | solute carrier family 9 (sodium/hydrogen exchanger), isoform 3 regulator 2     | Receptor signaling complex scaffold activity                            | Cytoplasm                       | Adapter molecule                                      | Cell communication;Signal transduction                                  | PDZ                       | Yes                      |
| CORO1B      | 57175   | coronin-1B                                                                                 | NP_001018080.1    | 1          | 10                | 11         | 25     | 1.27                                              | 1.42                                              | 2.18                                                                         | 2.59                                                                         | 10.4                                                                            | 13.8                                                                            | 14                                                                   | 14                                                                   | 16743   | 57175          | coronin, actin binding protein, 1B                                             | Molecular function unknown                                              | -                               | Unclassified                                          | Cell motility                                                           | WD40                      | Yes                      |
| GYG1        | 2992    | glycogenin-1 isoform 1                                                                     | NP_004121.2       | 3          | 5                 | 5          | 7      | 1.27                                              | 1.29                                              | 1.94                                                                         | 11.38                                                                        | 5.5                                                                             | 33.8                                                                            | 5                                                                    | 5                                                                    | 6805    | 2992           | glycogenin                                                                     | Molecular function unknown                                              | -                               | Unclassified                                          | Metabolism;Energy pathways                                              | -                         | Yes                      |
| PLCG1       | 5335    | 1-phosphatidylinositol 4,5-bisphosphate phospholipase gamma-1 isoform a                    | NP_002651.2       | 2          | 8                 | 8          | 11     | 1.27                                              | 1.26                                              | 8.05                                                                         | 4.96                                                                         | 27.5                                                                            | 16.7                                                                            | 7                                                                    | 7                                                                    | 1398    | 5335           | phospholipase C, gamma 1                                                       | Phospholipase activity                                                  | Cytoplasm                       | Enzyme: Phospholipase                                 | Metabolism                                                              | PH,SH2,SH3,C2,PLCxc,PLCYc | Yes                      |

Supplementary Table S1. List of quantified proteins in OKF6/TERT1-Smoke cells  
 Raigonalan *et al.*, 2017. Role of protein kinase N2 (PKN2) in cigarette smoke-mediated oncogenic transformation of oral cells

| Gene Symbol | Gene ID | Protein Description                                                        | Protein Accession | # Proteins | # Unique Peptides | # Peptides | # PSMs | OKF6/TERT1-Smoke/<br>OKF6/TERT1-Parental<br>(130/126) R1 | OKF6/TERT1-Smoke/<br>OKF6/TERT1-Parental<br>(128/127) R2 | Ratio Standard Errors [%]:<br>OKF6/TERT1-Smoke/<br>OKF6/TERT1-Parental<br>(130/126) R1 | Ratio Standard Errors [%]:<br>OKF6/TERT1-Smoke/<br>OKF6/TERT1-Parental<br>(128/127) R2 | Ratio Variabilities [%]:<br>F13: OKF6/TERT1-<br>Smoke/<br>OKF6/TERT1-Parental<br>(130/126) R1 | Ratio Variabilities [%]:<br>F13: OKF6/TERT1-<br>Smoke/<br>OKF6/TERT1-Parental<br>(128/127) R2 | Ratio Counts: F13:<br>OKF6/TERT1-Smoke/<br>OKF6/TERT1-Parental<br>(130/126) R1 | Ratio Counts: F13:<br>OKF6/TERT1-Smoke/<br>OKF6/TERT1-Parental<br>(128/127) R2 | HPRD ID | Entrez Gene Id | Gene Name                                                         | Molecular Function                            | Primary Localization | Molecular Class                     | Biological Process                                                           | Domains         | Plasma Proteome Database |
|-------------|---------|----------------------------------------------------------------------------|-------------------|------------|-------------------|------------|--------|----------------------------------------------------------|----------------------------------------------------------|----------------------------------------------------------------------------------------|----------------------------------------------------------------------------------------|-----------------------------------------------------------------------------------------------|-----------------------------------------------------------------------------------------------|--------------------------------------------------------------------------------|--------------------------------------------------------------------------------|---------|----------------|-------------------------------------------------------------------|-----------------------------------------------|----------------------|-------------------------------------|------------------------------------------------------------------------------|-----------------|--------------------------|
| GPT2        | 84706   | alanine aminotransferase 2 isoform 1                                       | NP_597700.1       | 2          | 1                 | 1          | 2      | 1.27                                                     | 1.22                                                     |                                                                                        |                                                                                        |                                                                                               |                                                                                               | 1                                                                              | 1                                                                              | 6307    | 84706          | glutamic pyruvate transaminase (alanine aminotransferase) 2       | Transaminase activity                         | Cytoplasm            | Enzyme: Aminotransferase            | Metabolism;Energy pathways                                                   | -               | No                       |
| MOC53       | 27304   | adenylyltransferase and sulfatransferase MOC53                             | NP_055299.1       | 1          | 5                 | 5          | 13     | 1.27                                                     | 1.2                                                      | 8.31                                                                                   | 6.36                                                                                   | 28.6                                                                                          | 20.4                                                                                          | 7                                                                              | 7                                                                              | 10092   | 27304          | molybdenum cofactor synthesis 3                                   | Sulfotransferase activity                     | Cytoplasm            | Enzyme: Sulfotransferase            | Metabolism;Energy pathways                                                   | RHOD,CC         | Yes                      |
| SRSF7       | 6432    | serine/arginine-rich splicing factor 7 isoform 1                           | NP_001026854.1    | 2          | 8                 | 9          | 29     | 1.27                                                     | 1.19                                                     | 8.05                                                                                   | 12.91                                                                                  | 41.2                                                                                          | 65                                                                                            | 15                                                                             | 15                                                                             |         |                |                                                                   |                                               |                      |                                     |                                                                              |                 |                          |
| GNL3        | 26354   | guanine nucleotide-binding protein-like 3 isoform 1                        | NP_055181.3       | 2          | 13                | 13         | 33     | 1.27                                                     | 1.16                                                     | 4.83                                                                                   | 6.42                                                                                   | 26.4                                                                                          | 33.4                                                                                          | 18                                                                             | 19                                                                             | 6419    | 26354          | guanine nucleotide binding protein-like 3(nucleolar)              | GTP-binding                                   | Nucleolus            | Cell cycle control protein          | Regulation of cell proliferation                                             | CC,NLS          | Yes                      |
| DNTTIP2     | 30836   | deoxynucleotidyltransferase terminal-interacting protein 2                 | NP_055412.2       | 1          | 9                 | 9          | 23     | 1.27                                                     | 1.16                                                     | 2.3                                                                                    | 5.89                                                                                   | 9.7                                                                                           | 23                                                                                            | 11                                                                             | 11                                                                             | 9994    | 30836          | None                                                              | DNA binding                                   | Nucleus              | DNA binding protein                 | Regulation of nucleobase, nucleoside, nucleotide and nucleic acid metabolism | CC,NLS          | Yes                      |
| TP53RK      | 112858  | TP53-regulating kinase                                                     | NP_291028.3       | 1          | 3                 | 3          | 8      | 1.27                                                     | 1.15                                                     | 6.86                                                                                   | 7.98                                                                                   | 17.5                                                                                          | 20.8                                                                                          | 4                                                                              | 5                                                                              | 12276   | 112858         | TP53 regulating kinase                                            | Protein serine/threonine kinase activity      | Nucleus              | Serine/threonine kinase             | Cell communication;Signal transduction                                       | KOW,NLS         | Yes                      |
| BAG5        | 9529    | BAG family molecular chaperone regulator 5 isoform a                       | NP_001015049.1    | 2          | 7                 | 7          | 13     | 1.27                                                     | 1.05                                                     | 5.71                                                                                   | 13.69                                                                                  | 19.4                                                                                          | 39.5                                                                                          | 7                                                                              | 7                                                                              | 4862    | 9529           | BCL2-associated athanogene 5                                      | Molecular function unknown                    | -                    | Unclassified                        | Biological process unknown                                                   | BAG,CC          | Yes                      |
| ARHGEF35    | 445328  | rho guanine nucleotide exchange factor 35                                  | NP_001003702.2    | 1          | 1                 | 2          | 3      | 1.27                                                     | 1.04                                                     |                                                                                        |                                                                                        |                                                                                               |                                                                                               | 1                                                                              | 1                                                                              |         |                |                                                                   |                                               |                      |                                     |                                                                              |                 |                          |
| ANKLE2      | 23141   | ankyrin repeat and LEM domain-containing protein 2                         | NP_055929.1       | 1          | 3                 | 3          | 4      | 1.27                                                     | 1.04                                                     | 17.7                                                                                   | 20.12                                                                                  | 32.7                                                                                          | 30.2                                                                                          | 2                                                                              | 2                                                                              | 19309   | 23141          | KIAA0692                                                          | Molecular function unknown                    | -                    | Unclassified                        | Biological process unknown                                                   | ANK,SP          | No                       |
| CHMP2B      | 25978   | charged multivesicular body protein 2b isoform 1                           | NP_054762.2       | 2          | 3                 | 4          | 8      | 1.27                                                     | 0.96                                                     | 18.63                                                                                  | 0.72                                                                                   | 42.7                                                                                          | 1.2                                                                                           | 3                                                                              | 3                                                                              | 13174   | 25978          | chromatin modifying protein 2B                                    | Transporter activity                          | -                    | Transport/cargo protein             | Transport                                                                    | CC              | No                       |
| GABPB1      | 2553    | GA-binding protein subunit beta-1 isoform beta 1                           | NP_005245.2       | 4          | 1                 | 1          | 1      | 1.27                                                     | 0.95                                                     |                                                                                        |                                                                                        |                                                                                               |                                                                                               | 1                                                                              | 1                                                                              | 15975   | 2553           | GA binding protein transcription factor, betasubunit 2            | Transcription factor activity                 | Nucleus              | Transcription factor                | Regulation of nucleobase, nucleoside, nucleotide and nucleic acid metabolism | ANK,CC          | Yes                      |
| PBRM1       | 55193   | protein polybromo-1                                                        | NP_060783.3       | 1          | 3                 | 3          | 5      | 1.27                                                     | 0.95                                                     | 0.39                                                                                   | 22.69                                                                                  | 0.9                                                                                           | 38.7                                                                                          | 3                                                                              | 3                                                                              | 7302    | 55193          | None                                                              | Chromatin binding                             | Nucleus              | Regulatory/other subunit            | Regulation of development                                                    | BROMO,HMG,C,BAH | Yes                      |
| UBA5        | 79876   | ubiquitin-like modifier-activating enzyme 5 isoform 1                      | NP_079094.1       | 2          | 3                 | 3          | 5      | 1.27                                                     | 0.92                                                     | 5.34                                                                                   | 7.21                                                                                   | 11.8                                                                                          | 11.5                                                                                          | 3                                                                              | 3                                                                              | 15598   | 79876          | ubiquitin-activating enzyme E1-domain-containing 1                | Protein binding                               | Integral to membrane | Ubiquitin proteasome system protein | Protein metabolism                                                           | TM              | No                       |
| TJAP1       | 93643   | tight junction-associated protein 1 isoform a                              | NP_001139488.1    | 2          | 1                 | 1          | 2      | 1.27                                                     | 0.9                                                      |                                                                                        |                                                                                        |                                                                                               |                                                                                               | 1                                                                              | 1                                                                              | 10269   | 93643          | tight junction protein 4 (peripheral)                             | Cell adhesion molecule activity               | Plasma membrane      | Cell junction protein               | Cell growth and/or maintenance                                               | CC              | No                       |
| RAB3A       | 5864    | ras-related protein Rab-3A                                                 | NP_002857.1       | 12         | 2                 | 6          | 54     | 1.27                                                     | 0.8                                                      |                                                                                        |                                                                                        |                                                                                               |                                                                                               | 1                                                                              | 1                                                                              | 1535    | 5864           | RAB3A, member RAS oncogene family                                 | GTPase activity                               | Golgi apparatus      | GTPase                              | Cell communication;Signal transduction                                       | RAB             | No                       |
| PSMG4       | 389362  | proteasome assembly chaperone 4 isoform a                                  | NP_001122064.1    | 3          | 1                 | 1          | 2      | 1.27                                                     | 0.79                                                     |                                                                                        |                                                                                        |                                                                                               |                                                                                               | 1                                                                              | 1                                                                              | 19577   | 389362         | proteasome (prosome, macropain) assembly chaperone 4              | Molecular function unknown                    | -                    | Unclassified                        | Biological process unknown                                                   | -               | Yes                      |
| TRAF6       | 7189    | TNF receptor-associated factor 6                                           | NP_004611.1       | 1          | 1                 | 1          | 2      | 1.27                                                     | 0.71                                                     |                                                                                        |                                                                                        |                                                                                               |                                                                                               | 1                                                                              | 1                                                                              | 3833    | 7189           | TNF receptor-associated factor 6                                  | Signal transducer activity                    | Cytoplasm            | Adapter molecule                    | Signal transduction                                                          | RING,MATH,CC    | Yes                      |
| B4GALT1     | 2683    | beta-1,4-galactosyltransferase 1                                           | NP_001488.2       | 2          | 5                 | 5          | 15     | 1.26                                                     | 1.73                                                     | 3.4                                                                                    | 5.82                                                                                   | 9.6                                                                                           | 22.8                                                                                          | 5                                                                              | 5                                                                              | 659     | 2683           | UDP-Gal:beta-GlcNAc beta 1,4-galactosyltransferase, polypeptide 1 | Galactosyltransferase activity                | Golgi apparatus      | Enzyme: Galactosyltransferase       | Metabolism;Energy pathways                                                   | SP,TM           | Yes                      |
| PPP1CA      | 5499    | serine/threonine-protein phosphatase PP1-alpha catalytic subunit isoform 3 | NP_001008709.1    | 3          | 3                 | 15         | 53     | 1.26                                                     | 1.49                                                     | 4.19                                                                                   | 10.13                                                                                  | 9.2                                                                                           | 26.7                                                                                          | 3                                                                              | 3                                                                              | 15942   | 5499           | protein phosphatase 1, catalytic subunit, alpha isoform           | Protein serine/threonine phosphatase activity | Cytoskeleton         | Serine/threonine phosphatase        | Cell proliferation                                                           | PP2A            | Yes                      |
| NASP        | 4678    | nuclear autoantigenic sperm protein isoform 2                              | NP_002473.2       | 3          | 29                | 29         | 89     | 1.26                                                     | 1.34                                                     | 3.95                                                                                   | 4.43                                                                                   | 32.8                                                                                          | 39                                                                                            | 41                                                                             | 40                                                                             | 4423    | 4678           | nuclear autoantigenic sperm protein(histone-binding)              | Histone binding                               | Nucleus,Cytoplasm    | Cell cycle control protein          | Cell communication;Signal transduction;Regulation of cell cycle              | TPR,CC          | Yes                      |
| NMD3        | 51068   | 60S ribosomal export protein NMD3                                          | NP_057022.2       | 1          | 5                 | 5          | 8      | 1.26                                                     | 1.29                                                     | 4.55                                                                                   | 10.18                                                                                  | 12.9                                                                                          | 30.1                                                                                          | 5                                                                              | 5                                                                              | 13026   | 51068          | NMD3 homolog (S. cerevisiae)                                      | Molecular function unknown                    | Nucleolus            | Unclassified                        | Biological process unknown                                                   | -               | No                       |
| NUP50       | 10762   | nuclear pore complex protein Nup50 isoform b                               | NP_009103.2       | 2          | 5                 | 5          | 8      | 1.26                                                     | 1.29                                                     | 4                                                                                      | 8.25                                                                                   | 10.1                                                                                          | 21.6                                                                                          | 4                                                                              | 4                                                                              | 5226    | 10762          | nucleoporin 50kDa                                                 | Transporter activity                          | Nucleoplasm          | Transport/cargo protein             | Transport                                                                    | -               | Yes                      |
| RPRD1B      | 58490   | regulation of nuclear pre-mRNA domain-containing protein 1B                | NP_067038.1       | 1          | 8                 | 9          | 49     | 1.26                                                     | 1.24                                                     | 6.87                                                                                   | 5.73                                                                                   | 40.4                                                                                          | 32.5                                                                                          | 20                                                                             | 20                                                                             | 8513    | 58490          | chromosome 20 open reading frame 77                               | Molecular function unknown                    | Nucleus              | Unclassified                        | Regulation of nucleobase, nucleoside, nucleotide and nucleic acid metabolism | CC              | Yes                      |
| OXCT1       | 5019    | succinyl-CoA:3-ketoacid coenzyme A transferase 1, mitochondrial precursor  | NP_000427.1       | 2          | 9                 | 9          | 27     | 1.26                                                     | 1.21                                                     | 3.21                                                                                   | 7.58                                                                                   | 15.2                                                                                          | 35.4                                                                                          | 14                                                                             | 14                                                                             | 2001    | 5019           | 3-oxoacid CoA transferase 1                                       | CoA-transferase activity                      | Mitochondrion        | Enzyme: CoA transferase             | Metabolism;Energy pathways                                                   | SP              | Yes                      |
| NSA2        | 10412   | ribosome biogenesis protein NSA2 homolog isoform 1                         | NP_055701.1       | 2          | 5                 | 5          | 16     | 1.26                                                     | 1.17                                                     | 8.09                                                                                   | 4.97                                                                                   | 29.3                                                                                          | 16.5                                                                                          | 8                                                                              | 8                                                                              | 18191   | 10412          | None                                                              | Molecular function unknown                    | Nucleus              | Unclassified                        | Regulation of nucleobase, nucleoside, nucleotide and nucleic acid metabolism | -               | Yes                      |
| WBG         | 84305   | partner of Y14 and mago isoform 1                                          | NP_115721.1       | 2          | 8                 | 8          | 19     | 1.26                                                     | 1.15                                                     | 6.63                                                                                   | 5.73                                                                                   | 26.9                                                                                          | 21                                                                                            | 10                                                                             | 10                                                                             | 17940   | 84305          | within hcen homolog (Drosophila)                                  | Molecular function unknown                    | -                    | Unclassified                        | Biological process unknown                                                   | CC              | Yes                      |

Supplementary Table S1. List of quantified proteins in OKF6/TERT1-Smoke cells  
 Raingonalan *et al.*, 2017. Role of protein kinase N2 (PKN2) in cigarette smoke-mediated oncogenic transformation of oral cells

| Gene Symbol | Gene ID | Protein Description                                                             | Protein Accession | # Proteins | # Unique Peptides | # Peptides | # PSMs | OKF6/TERT1-Smoke/<br>OKF6/TERT1-Parental<br>(130/126) R1 | OKF6/TERT1-Smoke/<br>OKF6/TERT1-Parental<br>(128/127) R2 | Ratio Standard Errors [%]:<br>OKF6/TERT1-Smoke/<br>OKF6/TERT1-Parental<br>(130/126) R1 | Ratio Standard Errors [%]:<br>OKF6/TERT1-Smoke/<br>OKF6/TERT1-Parental<br>(128/127) R2 | Ratio Variabilities [%]:<br>F13: OKF6/TERT1-<br>Smoke/<br>OKF6/TERT1-Parental<br>(130/126) R1 | Ratio Variabilities [%]:<br>F13: OKF6/TERT1-<br>Smoke/<br>OKF6/TERT1-Parental<br>(128/127) R2 | Ratio Counts: F13:<br>OKF6/TERT1-Smoke/<br>OKF6/TERT1-Parental<br>(130/126) R1 | Ratio Counts: F13:<br>OKF6/TERT1-Smoke/<br>OKF6/TERT1-Parental<br>(128/127) R2 | HPRD ID | Entrez Gene Id | Gene Name                                                                              | Molecular Function                         | Primary Localization  | Molecular Class                    | Biological Process                                                           | Domains                    | Plasma Proteome Database |
|-------------|---------|---------------------------------------------------------------------------------|-------------------|------------|-------------------|------------|--------|----------------------------------------------------------|----------------------------------------------------------|----------------------------------------------------------------------------------------|----------------------------------------------------------------------------------------|-----------------------------------------------------------------------------------------------|-----------------------------------------------------------------------------------------------|--------------------------------------------------------------------------------|--------------------------------------------------------------------------------|---------|----------------|----------------------------------------------------------------------------------------|--------------------------------------------|-----------------------|------------------------------------|------------------------------------------------------------------------------|----------------------------|--------------------------|
| IRF3        | 3661    | interferon regulatory factor 3 isoform 1                                        | NP_001562.1       | 6          | 6                 | 6          | 18     | 1.26                                                     | 1.12                                                     | 8.3                                                                                    | 9.8                                                                                    | 35.8                                                                                          | 35.7                                                                                          | 11                                                                             | 10                                                                             | 4769    | 3661           | interferon regulatory factor 3                                                         | Transcription factor activity              | Nucleus               | Transcription factor               | Regulation of nucleobase, nucleoside, nucleotide and nucleic acid metabolism | IRF                        | Yes                      |
| CADM1       | 23705   | cell adhesion molecule 1 isoform A precursor                                    | NP_001287972.1    | 5          | 1                 | 1          | 2      | 1.26                                                     | 1.12                                                     |                                                                                        |                                                                                        |                                                                                               |                                                                                               | 1                                                                              | 1                                                                              | 5746    | 23705          | immunoglobulin superfamily, member 4                                                   | Cell adhesion molecule activity            | Plasma membrane       | Adhesion molecule                  | Cell communication, Signal transduction                                      | SPJ;Ig_LIKE;IG C2;Band 4.1 | Yes                      |
| ARAP3       | 64411   | arf-GAP with Rho-GAP domain, ANK repeat and PH domain-containing protein 3      | NP_071926.4       | 1          | 4                 | 4          | 6      | 1.26                                                     | 1.1                                                      | 22.03                                                                                  | 10.23                                                                                  | 60.1                                                                                          | 22.7                                                                                          | 4                                                                              | 4                                                                              | 9441    | 64411          | centaurin, delta 3                                                                     | GTPase activator activity                  | Cytoplasm             | GTPase activating protein          | Cell communication, Signal transduction                                      | -                          | No                       |
| SRPR        | 6734    | signal recognition particle receptor subunit alpha isoform 1                    | NP_003130.2       | 2          | 16                | 16         | 46     | 1.26                                                     | 1.09                                                     | 3.56                                                                                   | 6.7                                                                                    | 22.7                                                                                          | 37.7                                                                                          | 25                                                                             | 25                                                                             | 1645    | 6734           | signal recognition particle receptor (locking protein)                                 | Molecular function unknown                 | Endoplasmic reticulum | Integral membrane protein          | Protein metabolism                                                           | AAA;SP                     | Yes                      |
| ZC3H4       | 25211   | zinc finger CCHC domain-containing protein 4                                    | NP_055983.1       | 1          | 8                 | 9          | 25     | 1.26                                                     | 1.05                                                     | 3                                                                                      | 3.73                                                                                   | 12                                                                                            | 12.4                                                                                          | 10                                                                             | 10                                                                             | 19314   | 25211          | chromosome 19 open reading frame 7                                                     | Molecular function unknown                 | -                     | Unclassified                       | Biological process unknown                                                   | CC;ZnF_C3H1                | Yes                      |
| GTF2F1      | 2962    | general transcription factor IIF subunit 1                                      | NP_002087.2       | 1          | 14                | 14         | 22     | 1.26                                                     | 1.03                                                     | 2.61                                                                                   | 11.42                                                                                  | 11.9                                                                                          | 44.2                                                                                          | 13                                                                             | 13                                                                             | 1803    | 2962           | general transcription factor IIF polypeptide1, 74kDa                                   | Transcription factor activity              | Nucleus               | Transcription factor               | Regulation of nucleobase, nucleoside, nucleotide and nucleic acid metabolism | CC                         | Yes                      |
| HDHD3       | 81932   | haloacid dehalogenase-like hydrolase domain-containing protein 3                | NP_112496.1       | 1          | 1                 | 1          | 3      | 1.26                                                     | 1.03                                                     | 6.92                                                                                   | 2.92                                                                                   | 12.4                                                                                          | 4.2                                                                                           | 2                                                                              | 2                                                                              | 13641   | 81932          | haloacid dehalogenase-like hydrolase domain-containing 3                               | Hydrolase activity                         | -                     | Enzyme: Hydrolase                  | Metabolism;Energy pathways                                                   | -                          | No                       |
| ZCCHC8      | 55596   | zinc finger CCHC domain-containing protein 8                                    | NP_060082.2       | 1          | 10                | 10         | 21     | 1.26                                                     | 0.99                                                     | 6.66                                                                                   | 6.97                                                                                   | 28.3                                                                                          | 23.1                                                                                          | 11                                                                             | 11                                                                             | 11698   | 55596          | zinc finger, CCHC domain containing 8                                                  | Molecular function unknown                 | Nucleus               | Unclassified                       | Biological process unknown                                                   | CC;ZnF_C2HC                | Yes                      |
| DCAF13      | 25879   | DDB1- and CUL4-associated factor 13                                             | NP_056235.4       | 1          | 5                 | 5          | 10     | 1.26                                                     | 0.96                                                     | 12.71                                                                                  | 3.91                                                                                   | 37                                                                                            | 8.4                                                                                           | 5                                                                              | 5                                                                              | 8528    | 25879          | WD repeats and SOF1 domain containing                                                  | Molecular function unknown                 | Nucleolus             | Unclassified                       | Regulation of nucleobase, nucleoside, nucleotide and nucleic acid metabolism | WD40                       | No                       |
| ESF1        | 51575   | ESF1 homolog                                                                    | NP_057733.2       | 1          | 4                 | 4          | 8      | 1.26                                                     | 0.95                                                     | 2.59                                                                                   | 4.26                                                                                   | 6.5                                                                                           | 8.1                                                                                           | 4                                                                              | 4                                                                              | 10732   | 51575          | chromosome 20 open reading frame 6                                                     | Molecular function unknown                 | Nucleolus             | Unclassified                       | Biological process unknown                                                   | CC                         | Yes                      |
| HEXIM1      | 10614   | protein HEXIM1                                                                  | NP_006451.1       | 3          | 8                 | 8          | 26     | 1.26                                                     | 0.94                                                     | 4.69                                                                                   | 9.97                                                                                   | 20.6                                                                                          | 33.3                                                                                          | 12                                                                             | 12                                                                             | 9544    | 10614          | None                                                                                   | Transcription factor activity              | Nucleus               | Transcription factor               | Regulation of nucleobase, nucleoside, nucleotide and nucleic acid metabolism | CC                         | No                       |
| HMG2        | 3148    | high mobility group protein B2                                                  | NP_001124160.1    | 1          | 3                 | 4          | 18     | 1.26                                                     | 0.9                                                      | 4.31                                                                                   | 9.86                                                                                   | 12.2                                                                                          | 20                                                                                            | 5                                                                              | 5                                                                              | 1229    | 3148           | high-mobility group box 2                                                              | Transcription regulator activity           | Nucleus               | Transcription regulatory protein   | Regulation of nucleobase, nucleoside, nucleotide and nucleic acid metabolism | HMG                        | Yes                      |
| RBM26       | 64062   | RNA-binding protein 26 isoform 2                                                | NP_001273561.1    | 2          | 2                 | 7          | 14     | 1.26                                                     | 0.9                                                      | 9.87                                                                                   | 11.74                                                                                  | 17.7                                                                                          | 15                                                                                            | 2                                                                              | 2                                                                              | 12611   | 64062          | chromosome 13 open reading frame 10                                                    | RNA binding                                | Nucleus               | RNA binding protein                | Regulation of nucleobase, nucleoside, nucleotide and nucleic acid metabolism | ZnF_C3H1;RRM;CC            | Yes                      |
| DIDO1       | 11083   | death-inducer obliterator 1 isoform c                                           | NP_149072.2       | 3          | 8                 | 8          | 20     | 1.26                                                     | 0.89                                                     | 2.22                                                                                   | 8.75                                                                                   | 8.9                                                                                           | 25                                                                                            | 10                                                                             | 10                                                                             | 10363   | 11083          | death associated transcription factor 1                                                | Molecular function unknown                 | Nucleus;Cytoplasm     | Unclassified                       | Apoptosis                                                                    | PHD;TFS2M                  | Yes                      |
| TRMT6       | 51605   | tRNA (adenine(58)-N(1))-methyltransferase non-catalytic subunit TRMT6 isoform 1 | NP_057023.2       | 2          | 3                 | 3          | 6      | 1.26                                                     | 0.86                                                     | 6.15                                                                                   | 19.28                                                                                  | 13.5                                                                                          | 29.4                                                                                          | 3                                                                              | 3                                                                              | 13027   | 51605          | None                                                                                   | Molecular function unknown                 | -                     | Unclassified                       | Biological process unknown                                                   | CC                         | No                       |
| ELOF1       | 84337   | transcription elongation factor 1 homolog                                       | NP_115753.1       | 1          | 1                 | 1          | 2      | 1.26                                                     | 0.85                                                     |                                                                                        |                                                                                        |                                                                                               |                                                                                               | 1                                                                              | 1                                                                              | 14639   | 84337          | elongation factor 1 homolog (ELF1; Scerevisiae)                                        | Molecular function unknown                 | -                     | Unclassified                       | Biological process unknown                                                   | -                          | No                       |
| BET1        | 10282   | BET1 homolog                                                                    | NP_005859.1       | 1          | 2                 | 2          | 6      | 1.26                                                     | 0.85                                                     | 0.36                                                                                   | 30.52                                                                                  | 0.8                                                                                           | 47                                                                                            | 3                                                                              | 3                                                                              | 16107   | 10282          | BET1 homolog (S. cerevisiae)                                                           | Protein binding                            | Golgi apparatus       | Integral membrane protein          | Transport                                                                    | t_SNARE;TM                 | Yes                      |
| SLC2A14     | 144195  | solute carrier family 2, facilitated glucose transporter member 14 isoform d    | NP_001273166.1    | 5          | 3                 | 3          | 5      | 1.26                                                     | 0.84                                                     | 18.29                                                                                  | 19.4                                                                                   | 41.5                                                                                          | 28.8                                                                                          | 3                                                                              | 3                                                                              | 11573   | 144195         | solute carrier family 2 (facilitated glucosetransporter), member 14                    | Transporter activity                       | -                     | Transport/cargo protein            | Transport                                                                    | TM                         | No                       |
| CACNA1B     | 774     | voltage-dependent N-type calcium channel subunit alpha-1B isoform 1             | NP_000709.1       | 2          | 1                 | 1          | 1      | 1.26                                                     | 0.83                                                     |                                                                                        |                                                                                        |                                                                                               |                                                                                               | 1                                                                              | 1                                                                              | 3005    | 774            | calcium channel, voltage-dependent, L type, alpha 1B subunit                           | Voltage-gated ion channel activity         | Plasma membrane       | Voltage gated channel              | Transport                                                                    | TM;CC                      | Yes                      |
| SUMO1       | 7341    | small ubiquitin-related modifier 1 isoform a precursor                          | NP_003343.1       | 2          | 3                 | 3          | 4      | 1.26                                                     | 0.8                                                      | 2.56                                                                                   | 2.45                                                                                   | 5.6                                                                                           | 3.4                                                                                           | 3                                                                              | 3                                                                              | 3554    | 7341           | SMT3 suppressor of mit two 3 homolog 1 (yeast)                                         | Protein binding                            | Cytoplasm             | Transcription regulatory protein   | Regulation of cell cycle;Apoptosis;Protein modification                      | UBQ                        | Yes                      |
| EEF1D       | 1936    | elongation factor 1-delta isoform 1                                             | NP_115754.3       | 3          | 2                 | 10         | 52     | 1.26                                                     | 0.79                                                     | 2.4                                                                                    | 0.72                                                                                   | 6.8                                                                                           | 1.3                                                                                           | 5                                                                              | 5                                                                              | 560     | 1936           | eukaryotic translation elongation factor 1 delta (guanine nucleotide exchange protein) | Guanyl-nucleotide exchange factor activity | Endoplasmic reticulum | Guanine nucleotide exchange factor | Cell communication; Signal transduction                                      | CC                         | Yes                      |
| FXR2        | 9513    | fragile X mental retardation syndrome-related protein 2                         | NP_004851.2       | 1          | 4                 | 7          | 12     | 1.26                                                     | 0.78                                                     | 9.71                                                                                   | 9.69                                                                                   | 24.8                                                                                          | 15.2                                                                                          | 4                                                                              | 4                                                                              | 5629    | 9513           | fragile X mental retardation, autosomal homolog2                                       | RNA binding                                | Cytoplasm             | RNA binding protein                | Regulation of nucleobase, nucleoside, nucleotide and nucleic acid metabolism | KH;NES                     | Yes                      |
| MRPS21      | 54460   | 28S ribosomal protein S21, mitochondrial                                        | NP_114107.1       | 1          | 2                 | 2          | 4      | 1.26                                                     | 0.55                                                     | 7.42                                                                                   | 35.48                                                                                  | 13.2                                                                                          | 28.3                                                                                          | 2                                                                              | 2                                                                              | 14784   | 54460          | mitochondrial ribosomal protein S21                                                    | Structural constituent of ribosome         | Mitochondrion         | Ribosomal subunit                  | Protein metabolism                                                           | -                          | No                       |

Supplementary Table S1. List of quantified proteins in OKF6/TERT1-Smoke cells  
 Raingopaln et al., 2017. Role of protein kinase N2 (PKN2) in cigarette smoke-mediated oncogenic transformation of oral cells

| Gene Symbol  | Gene ID   | Protein Description                                                              | Protein Accession | # Proteins | # Unique Peptides | # Peptides | # PSMs | OKF6/TERT1-Smoke/OKF6/TERT1-Parental (130/126) R1 | OKF6/TERT1-Smoke/OKF6/TERT1-Parental (128/127) R2 | Ratio Standard Errors [%]: OKF6/TERT1-Smoke/OKF6/TERT1-Parental (130/126) R1 | Ratio Standard Errors [%]: OKF6/TERT1-Smoke/OKF6/TERT1-Parental (128/127) R2 | Ratio Variabilities [%]: F13: OKF6/TERT1-Smoke/OKF6/TERT1-Parental (130/126) R1 | Ratio Variabilities [%]: F13: OKF6/TERT1-Smoke/OKF6/TERT1-Parental (128/127) R2 | Ratio Counts: F13: OKF6/TERT1-Smoke/OKF6/TERT1-Parental (130/126) R1 | Ratio Counts: F13: OKF6/TERT1-Smoke/OKF6/TERT1-Parental (128/127) R2 | HPRD ID | Entrez Gene ID | Gene Name                                                                                     | Molecular Function            | Primary Localization              | Molecular Class                 | Biological Process                                               | Domains     | Plasma Proteome Database |
|--------------|-----------|----------------------------------------------------------------------------------|-------------------|------------|-------------------|------------|--------|---------------------------------------------------|---------------------------------------------------|------------------------------------------------------------------------------|------------------------------------------------------------------------------|---------------------------------------------------------------------------------|---------------------------------------------------------------------------------|----------------------------------------------------------------------|----------------------------------------------------------------------|---------|----------------|-----------------------------------------------------------------------------------------------|-------------------------------|-----------------------------------|---------------------------------|------------------------------------------------------------------|-------------|--------------------------|
| ECE1         | 1889      | endothelin-converting enzyme 1 isoform 1                                         | NP_001388.1       | 4          | 5                 | 5          | 15     | 1.25                                              | 1.74                                              | 7.94                                                                         | 7.8                                                                          | 24.6                                                                            | 34.1                                                                            | 6                                                                    | 6                                                                    | 2690    | 1889           | endothelin converting enzyme 1                                                                | Metalloprotease activity      | Plasma membrane                   | Metallo protease                | Protein metabolism                                               | TM          | Yes                      |
| LENG8        | 114823    | leukocyte receptor cluster member 8                                              | NP_443157.1       | 1          | 3                 | 3          | 5      | 1.25                                              | 1.74                                              |                                                                              |                                                                              |                                                                                 |                                                                                 | 1                                                                    | 1                                                                    | 11226   | 114823         | leukocyte receptor cluster (LRC) member 8                                                     | Molecular function unknown    | -                                 | Unclassified                    | Biological process unknown                                       | -           | No                       |
| NAP1L4       | 4676      | nucleosome assembly protein 1-like 4                                             | NP_005960.1       | 1          | 13                | 15         | 87     | 1.25                                              | 1.71                                              | 5.77                                                                         | 7.01                                                                         | 46.1                                                                            | 83.8                                                                            | 37                                                                   | 37                                                                   | 11873   | 4676           | nucleosome assembly protein 1 like 4                                                          | Chaperone activity            | Nucleus                           | Chaperone                       | Regulation of nucleobase, nucleotide and nucleic acid metabolism | NLS         | Yes                      |
| GFPT1        | 2673      | glutamine-fructose-6-phosphate aminotransferase [isomerizing] 1 isoform 1        | NP_001231639.1    | 2          | 19                | 22         | 59     | 1.25                                              | 1.53                                              | 3.04                                                                         | 4.95                                                                         | 20.7                                                                            | 42.6                                                                            | 29                                                                   | 29                                                                   | 702     | 2673           | glutamine-fructose 6-phosphate transaminase 1                                                 | Transaminase activity         | Cytoplasm                         | Enzyme: Aminotransferase        | Metabolism;Energy pathways                                       | SIS         | Yes                      |
| PLA2G4A      | 5321      | cytosolic phospholipase A2                                                       | NP_077734.1       | 1          | 2                 | 2          | 5      | 1.25                                              | 1.45                                              | 2.8                                                                          | 5.37                                                                         | 6.1                                                                             | 13.6                                                                            | 3                                                                    | 3                                                                    | 8986    | 5321           | phospholipase A2, group IVA (cytosolic, calcium dependent)                                    | Phospholipase activity        | Cytoplasm                         | Enzyme: Phospholipase           | Metabolism;Energy pathways                                       | C2          | Yes                      |
| AGPAT1       | 10554     | 1-acyl-sn-glycerol-3-phosphate acyltransferase alpha                             | NP_116130.2       | 1          | 1                 | 1          | 2      | 1.25                                              | 1.44                                              |                                                                              |                                                                              |                                                                                 |                                                                                 | 1                                                                    | 1                                                                    | 4372    | 10554          | 1-acylglycerol-3-phosphate O-acyltransferase 1 (lysophosphatidic acid acyltransferase, alpha) | Acyltransferase activity      | Endoplasmic reticulum membrane    | Enzyme: Acyltransferase         | Metabolism;Energy pathways                                       | SP, TM      | Yes                      |
| PMPCB        | 9512      | mitochondrial-processing peptidase subunit beta precursor                        | NP_004270.2       | 1          | 10                | 10         | 21     | 1.25                                              | 1.36                                              | 3.71                                                                         | 2.27                                                                         | 16.1                                                                            | 10.7                                                                            | 12                                                                   | 12                                                                   | 7539    | 9512           | peptidase (mitochondrial processing) beta                                                     | Peptidase activity            | Mitochondrion                     | Protease                        | Protein metabolism                                               | SP          | Yes                      |
| PPP1R3D      | 5509      | protein phosphatase 1 regulatory subunit 3D                                      | NP_006233.1       | 1          | 1                 | 1          | 2      | 1.25                                              | 1.36                                              |                                                                              |                                                                              |                                                                                 |                                                                                 | 1                                                                    | 1                                                                    | 4507    | 5509           | protein phosphatase 1, regulatory subunit 3D                                                  | Molecular function unknown    | Cytoplasm                         | Regulatory/other subunit        | Metabolism;Energy pathways                                       | -           | Yes                      |
| DNAJC7       | 7266      | dnaJ homolog subfamily C member 7 isoform 1                                      | NP_003306.3       | 2          | 11                | 11         | 23     | 1.25                                              | 1.33                                              | 3.09                                                                         | 4.19                                                                         | 13.4                                                                            | 19.5                                                                            | 12                                                                   | 12                                                                   | 7046    | 7266           | DnaJ (Hsp40) homolog, subfamily C, member 7                                                   | Chaperone activity            | Cytoplasm                         | Chaperone                       | Protein metabolism;Protein folding                               | TPR, DNAJ   | No                       |
| C9orf64      | 84267     | UPF0553 protein C9orf64                                                          | NP_115683.3       | 1          | 3                 | 3          | 7      | 1.25                                              | 1.33                                              | 1.86                                                                         | 9.15                                                                         | 4                                                                               | 21.3                                                                            | 3                                                                    | 3                                                                    | 12969   | 84267          | chromosome 9 open reading frame 64                                                            | Molecular function unknown    | -                                 | Unclassified                    | Biological process unknown                                       | -           | No                       |
| TLR2         | 7097      | toll-like receptor 2 precursor                                                   | NP_003255.2       | 1          | 2                 | 2          | 4      | 1.25                                              | 1.31                                              | 13.89                                                                        | 9.25                                                                         | 25                                                                              | 17.2                                                                            | 2                                                                    | 2                                                                    | 4323    | 7097           | toll-like receptor 2                                                                          | Receptor activity             | Plasma membrane                   | Cell surface receptor           | Cell communication;Signal transduction                           | TM;LRR;TIR  | Yes                      |
| HSP90AB1     | 3326      | heat shock protein HSP 90-beta isoform a                                         | NP_001258898.1    | 3          | 32                | 54         | 631    | 1.25                                              | 1.25                                              | 2.23                                                                         | 3.36                                                                         | 34.3                                                                            | 53.5                                                                            | 143                                                                  | 142                                                                  | 6763    | 3326           | heat shock 90kDa protein 1, beta                                                              | Chaperone activity            | Cytoplasm                         | Chaperone                       | Cell communication;Signal transduction                           | CC          | Yes                      |
| CEP350       | 9857      | centrosome-associated protein 350                                                | NP_055625.4       | 1          | 2                 | 2          | 3      | 1.25                                              | 1.24                                              | 13.42                                                                        | 5.69                                                                         | 24                                                                              | 10                                                                              | 2                                                                    | 2                                                                    | 9870    | 9857           | None                                                                                          | Molecular function unknown    | Centrosome                        | Unclassified                    | Biological process unknown                                       | CC          | Yes                      |
| OAT          | 4942      | ornithine aminotransferase, mitochondrial isoform 1 precursor                    | NP_000265.1       | 3          | 18                | 19         | 71     | 1.25                                              | 1.24                                              | 3.26                                                                         | 3.78                                                                         | 23.7                                                                            | 28.2                                                                            | 33                                                                   | 35                                                                   | 2021    | 4942           | ornithine aminotransferase (gyrate atrophy)                                                   | Transaminase activity         | Mitochondrion                     | Enzyme: Aminotransferase        | Metabolism;Energy pathways                                       | SP          | No                       |
| PDI6A        | 10130     | protein disulfide-isomerase A6 isoform a                                         | NP_001269633.1    | 5          | 18                | 18         | 117    | 1.25                                              | 1.23                                              | 2.76                                                                         | 2.66                                                                         | 28                                                                              | 26.4                                                                            | 63                                                                   | 63                                                                   | 7504    | 10130          | protein disulfide isomerase-associated 6                                                      | Isomerase activity            | Endoplasmic reticulum             | Enzyme: Isomerase               | Protein metabolism                                               | SP          | Yes                      |
| SF3A3        | 10946     | splicing factor 3A subunit 3                                                     | NP_006793.1       | 1          | 12                | 12         | 55     | 1.25                                              | 1.18                                              | 4.25                                                                         | 7.07                                                                         | 29.2                                                                            | 47.2                                                                            | 29                                                                   | 29                                                                   | 10411   | 10946          | splicing factor 3a, subunit 3, 60kDa                                                          | RNA binding                   | Nucleus                           | RNA binding protein             | Protein metabolism                                               | ZnF_C2C2;CC | Yes                      |
| DDX5         | 1655      | probable ATP-dependent RNA helicase DDX5                                         | NP_004387.1       | 1          | 19                | 29         | 121    | 1.25                                              | 1.15                                              | 3.03                                                                         | 3.22                                                                         | 24.7                                                                            | 24.2                                                                            | 41                                                                   | 41                                                                   | 1615    | 1655           | DEAD (Asp-Glu-Ala-Asp) box polypeptide 5                                                      | RNA binding                   | Nucleus                           | RNA binding protein             | Regulation of nucleobase, nucleotide and nucleic acid metabolism | DEXDc;HELIC | Yes                      |
| MAK16        | 84549     | protein MAK16 homolog                                                            | NP_115898.2       | 1          | 2                 | 2          | 3      | 1.25                                              | 1.15                                              | 4.15                                                                         | 2.89                                                                         | 7.4                                                                             | 4.7                                                                             | 2                                                                    | 2                                                                    | 15223   | 84549          | RNA binding motif protein 13                                                                  | RNA binding                   | Nucleolus                         | RNA binding protein             | Regulation of nucleobase, nucleotide and nucleic acid metabolism | -           | No                       |
| FBXL18       | 80028     | F-box/LRR-repeat protein 18                                                      | NP_079239.3       | 1          | 4                 | 4          | 9      | 1.25                                              | 1.14                                              | 2.57                                                                         | 11.47                                                                        | 7.2                                                                             | 29.7                                                                            | 5                                                                    | 5                                                                    | 7753    | 80028          | F-box and leucine-rich repeat protein 18                                                      | Molecular function unknown    | -                                 | Unclassified                    | Biological process unknown                                       | F_BOX;CC    | No                       |
| SUPT6H       | 6830      | transcription elongation factor SPT6                                             | NP_003161.2       | 1          | 10                | 10         | 19     | 1.25                                              | 1.12                                              | 5.66                                                                         | 8.2                                                                          | 22.7                                                                            | 29.8                                                                            | 10                                                                   | 10                                                                   | 3211    | 6830           | suppressor of Ty 6 homolog (S. cerevisiae)                                                    | Transcription factor activity | Nucleus                           | Transcription factor            | Regulation of nucleobase, nucleotide and nucleic acid metabolism | S1;SH2      | Yes                      |
| LOC101929876 | 101929876 | 40S ribosomal protein S26                                                        | XP_005276741.1    | 2          | 5                 | 5          | 30     | 1.25                                              | 1.12                                              | 2.57                                                                         | 4.91                                                                         | 12.9                                                                            | 22.3                                                                            | 16                                                                   | 16                                                                   |         |                |                                                                                               |                               |                                   |                                 |                                                                  |             |                          |
| ISYNA1       | 51477     | inositol-3-phosphate synthase 1 isoform 1                                        | NP_057452.1       | 3          | 8                 | 8          | 15     | 1.25                                              | 1.1                                               | 3.4                                                                          | 4.7                                                                          | 13.5                                                                            | 16.5                                                                            | 10                                                                   | 10                                                                   | 17163   | 51477          | None                                                                                          | Isomerase activity            | -                                 | Enzyme: Isomerase               | Metabolism;Energy pathways                                       | -           | No                       |
| NANS         | 54187     | sialic acid synthase                                                             | NP_061819.2       | 1          | 7                 | 7          | 30     | 1.25                                              | 1.04                                              | 7.72                                                                         | 20.49                                                                        | 40.2                                                                            | 104                                                                             | 16                                                                   | 16                                                                   | 7285    | 54187          | N-acetylneuraminic acid synthase (sialic acid synthase)                                       | Catalytic activity            | Cytoplasm                         | Enzyme: Synthase                | Metabolism;Energy pathways                                       | -           | Yes                      |
| MUC19        | 283463    | mucin-19 precursor                                                               | NP_775871.2       | 1          | 2                 | 2          | 2      | 1.25                                              | 1.03                                              | 14.3                                                                         | 38.6                                                                         | 25.6                                                                            | 60.7                                                                            | 2                                                                    | 2                                                                    | 11377   | 283463         | mucin 19                                                                                      | Molecular function unknown    | -                                 | Unclassified                    | Biological process unknown                                       | -           | No                       |
| ADD3         | 120       | gamma-adducin isoform a                                                          | NP_058432.1       | 2          | 2                 | 2          | 7      | 1.25                                              | 0.99                                              | 6.08                                                                         | 20.46                                                                        | 15.3                                                                            | 42.1                                                                            | 4                                                                    | 4                                                                    | 3339    | 120            | adducin 3 (gamma)                                                                             | Cytoskeletal protein binding  | Plasma membrane;Nucleus;Cytoplasm | Cytoskeletal associated protein | Cell growth and/or maintenance                                   | CC          | Yes                      |
| SLIRP        | 81892     | SRA stem-loop-interacting RNA-binding protein, mitochondrial isoform 1 precursor | NP_112487.1       | 3          | 2                 | 2          | 3      | 1.25                                              | 0.97                                              | 21.39                                                                        | 49.13                                                                        | 39.2                                                                            | 75.9                                                                            | 2                                                                    | 2                                                                    |         |                |                                                                                               |                               |                                   |                                 |                                                                  |             |                          |
| FTSJ3        | 117246    | pre-rRNA processing protein FTSJ3                                                | NP_060117.3       | 1          | 12                | 12         | 32     | 1.25                                              | 0.96                                              | 4.76                                                                         | 7.87                                                                         | 23.4                                                                            | 30.9                                                                            | 15                                                                   | 16                                                                   | 17024   | 117246         | FtsJ homolog 3 (E. coli)                                                                      | Molecular function unknown    | Nucleolus                         | Unclassified                    | Biological process unknown                                       | CC          | Yes                      |
| CKM          | 1158      | creatine kinase M-type                                                           | NP_001815.2       | 1          | 1                 | 2          | 2      | 1.25                                              | 0.93                                              |                                                                              |                                                                              |                                                                                 |                                                                                 | 1                                                                    | 1                                                                    | 426     | 1158           | creatine kinase, muscle                                                                       | Catalytic activity            | Cytoplasm                         | Enzyme: Phosphotransferase      | Metabolism;Energy pathways                                       | -           | Yes                      |

Supplementary Table S1. List of quantified proteins in OKF6/TERT1-Smoke cells  
 Raingopaln *et al.*, 2017. Role of protein kinase N2 (PKN2) in cigarette smoke-mediated oncogenic transformation of oral cells

| Gene Symbol | Gene ID | Protein Description                                         | Protein Accession | # Proteins | # Unique Peptides | # Peptides | # PSMs | OKF6/TERT1-Smoke/<br>OKF6/TERT1-Parental<br>(130/126) R1 | OKF6/TERT1-Smoke/<br>OKF6/TERT1-Parental<br>(128/127) R2 | Ratio Standard Errors [%]:<br>OKF6/TERT1-Smoke/<br>OKF6/TERT1-Parental<br>(130/126) R1 | Ratio Standard Errors [%]:<br>OKF6/TERT1-Smoke/<br>OKF6/TERT1-Parental<br>(128/127) R2 | Ratio Variabilities [%]:<br>F13: OKF6/TERT1-<br>Smoke/<br>OKF6/TERT1-Parental<br>(130/126) R1 | Ratio Variabilities [%]:<br>F13: OKF6/TERT1-<br>Smoke/<br>OKF6/TERT1-Parental<br>(128/127) R2 | Ratio Counts: F13:<br>OKF6/TERT1-Smoke/<br>OKF6/TERT1-Parental<br>(130/126) R1 | Ratio Counts: F13:<br>OKF6/TERT1-Smoke/<br>OKF6/TERT1-Parental<br>(128/127) R2 | HPRD ID | Entrez Gene Id | Gene Name                                                                   | Molecular Function                       | Primary Localization  | Molecular Class                  | Biological Process                                                           | Domains          | Plasma Proteome Database |
|-------------|---------|-------------------------------------------------------------|-------------------|------------|-------------------|------------|--------|----------------------------------------------------------|----------------------------------------------------------|----------------------------------------------------------------------------------------|----------------------------------------------------------------------------------------|-----------------------------------------------------------------------------------------------|-----------------------------------------------------------------------------------------------|--------------------------------------------------------------------------------|--------------------------------------------------------------------------------|---------|----------------|-----------------------------------------------------------------------------|------------------------------------------|-----------------------|----------------------------------|------------------------------------------------------------------------------|------------------|--------------------------|
| GTFE1       | 2960    | general transcription factor IIE subunit 1                  | NP_005504.2       | 1          | 3                 | 3          | 8      | 1.25                                                     | 0.92                                                     | 11.26                                                                                  | 16.15                                                                                  | 28.8                                                                                          | 30.3                                                                                          | 4                                                                              | 4                                                                              | 1799    | 2960           | general transcription factor IIE, polypeptide1, alpha 56kDa                 | Transcription factor activity            | Nucleus               | Transcription factor             | Regulation of nucleobase, nucleoside, nucleotide and nucleic acid metabolism | -                | Yes                      |
| GMEB2       | 26205   | glucocorticoid modulatory element-binding protein 2         | NP_036516.1       | 1          | 1                 | 1          | 2      | 1.25                                                     | 0.91                                                     |                                                                                        |                                                                                        |                                                                                               |                                                                                               | 1                                                                              | 1                                                                              | 16245   | 26205          | glucocorticoid modulatory element binding protein 2                         | Transcription factor activity            | Nucleus               | Transcription factor             | Regulation of nucleobase, nucleoside, nucleotide and nucleic acid metabolism | SAND,CC          | Yes                      |
| RBM28       | 55131   | RNA-binding protein 28 isoform 1                            | NP_060547.2       | 2          | 5                 | 5          | 11     | 1.25                                                     | 0.89                                                     | 3.78                                                                                   | 5.98                                                                                   | 11.7                                                                                          | 13.2                                                                                          | 6                                                                              | 6                                                                              | 7668    | 55131          | RNA binding motif protein 28                                                | RNA binding                              | Nucleolus             | RNA binding protein              | Regulation of nucleobase, nucleoside, nucleotide and nucleic acid metabolism | RRM,CC           | Yes                      |
| FUT5        | 2527    | alpha-(1,3)-fucosyltransferase 5                            | NP_002025.2       | 3          | 1                 | 1          | 1      | 1.25                                                     | 0.82                                                     |                                                                                        |                                                                                        |                                                                                               |                                                                                               | 1                                                                              | 1                                                                              | 650     | 2527           | fucosyltransferase 5 (alpha (1,3)fucosyltransferase)                        | Fucosyltransferase activity              | Plasma membrane       | Enzyme: Fucosyltransferase       | Metabolism;Energy pathways                                                   | TM,SP            | Yes                      |
| PTPN9       | 5780    | tyrosine-protein phosphatase non-receptor type 9            | NP_002824.1       | 1          | 3                 | 3          | 4      | 1.25                                                     | 0.8                                                      | 15.21                                                                                  | 1.64                                                                                   | 27.4                                                                                          | 1.9                                                                                           | 2                                                                              | 2                                                                              | 2864    | 5780           | protein tyrosine phosphatase, non-receptor type9                            | Protein tyrosine phosphatase activity    | Cytoplasm             | Tyrosine phosphatase             | Cell communication;Signal transduction                                       | SEC14,Tyr_Phos   | Yes                      |
| EXT1        | 2131    | exostosin-1                                                 | NP_000118.2       | 1          | 1                 | 1          | 1      | 1.25                                                     | 0.78                                                     |                                                                                        |                                                                                        |                                                                                               |                                                                                               | 1                                                                              | 1                                                                              | 598     | 2131           | exostosins (multiple) 1                                                     | Transferase activity                     | Endoplasmic reticulum | Enzyme: Glycosyltransferase      | Metabolism;Energy pathways                                                   | SP               | Yes                      |
| NUDCD3      | 23386   | nudC domain-containing protein 3                            | NP_056147.2       | 1          | 7                 | 7          | 17     | 1.25                                                     | 0.72                                                     | 8.18                                                                                   | 16.2                                                                                   | 31.4                                                                                          | 35.9                                                                                          | 9                                                                              | 9                                                                              | 13831   | 23386          | NudC domain containing 3                                                    | Molecular function unknown               | -                     | Unclassified                     | Biological_process unknown                                                   | CC               | No                       |
| GTPBP3      | 84705   | rRNA modification GTPase GTPBP3, mitochondrial isoform IV   | NP_598399.2       | 4          | 1                 | 1          | 2      | 1.25                                                     | 0.66                                                     |                                                                                        |                                                                                        |                                                                                               |                                                                                               | 1                                                                              | 1                                                                              | 12255   | 84705          | GTP binding protein 3 (mitochondrial)                                       | GTPase activity                          | Mitochondrion         | G protein                        | Regulation of nucleobase, nucleoside, nucleotide and nucleic acid metabolism | RAS,SH3          | No                       |
| XYLB        | 9942    | xylulose kinase                                             | NP_005099.2       | 1          | 1                 | 1          | 1      | 1.25                                                     | 0.6                                                      |                                                                                        |                                                                                        |                                                                                               |                                                                                               | 1                                                                              | 1                                                                              | 6812    | 9942           | xylulokinase homolog (H. influenzae)                                        | Molecular function unknown               | -                     | Unclassified                     | Metabolism;Energy pathways                                                   | -                | No                       |
| PDIA3       | 2923    | protein disulfide-isomerase A3 precursor                    | NP_005304.3       | 1          | 37                | 37         | 203    | 1.24                                                     | 1.6                                                      | 2.53                                                                                   | 2.42                                                                                   | 34.1                                                                                          | 42.4                                                                                          | 111                                                                            | 110                                                                            | 3625    | 2923           | protein disulfide isomerase-associated 3                                    | Isomerase activity                       | Endoplasmic reticulum | Enzyme: Isomerase                | Protein metabolism                                                           | SP               | Yes                      |
| LOXL2       | 4017    | lysyl oxidase homolog 2 precursor                           | NP_002309.1       | 1          | 2                 | 2          | 3      | 1.24                                                     | 1.47                                                     | 0.84                                                                                   | 3.78                                                                                   | 1.5                                                                                           | 7.8                                                                                           | 2                                                                              | 2                                                                              | 9446    | 4017           | lysyl oxidase-like 2                                                        | Catalytic activity                       | Extracellular         | Enzyme: Oxidase                  | Cell growth and/or maintenance                                               | SP,SR            | Yes                      |
| PAFAH1B3    | 5050    | platelet-activating factor acetylhydrolase IB subunit gamma | NP_002564.1       | 1          | 4                 | 4          | 13     | 1.24                                                     | 1.4                                                      | 2.79                                                                                   | 3.72                                                                                   | 9.2                                                                                           | 13.8                                                                                          | 7                                                                              | 7                                                                              | 4354    | 5050           | platelet-activating factor acetylhydrolase, isoform Ib, gamma subunit 29kDa | Acyltransferase activity                 | Cytoplasm             | Enzyme: Acyltransferase          | Metabolism;Energy pathways                                                   | -                | Yes                      |
| PP1A        | 5478    | peptidyl-prolyl cis-trans isomerase A isoform 1             | NP_066953.1       | 9          | 11                | 12         | 129    | 1.24                                                     | 1.38                                                     | 2.98                                                                                   | 4.7                                                                                    | 21.9                                                                                          | 39.1                                                                                          | 34                                                                             | 34                                                                             | 457     | 5478           | peptidylprolyl isomerase A (cyclophilin A)                                  | Isomerase activity                       | Cytoplasm             | Enzyme: Isomerase                | Protein folding;Peptide metabolism                                           | -                | Yes                      |
| C11orf54    | 28970   | ester hydrolase C11orf54 isoform a                          | NP_001272996.1    | 4          | 1                 | 1          | 4      | 1.24                                                     | 1.36                                                     | 14.09                                                                                  | 28.58                                                                                  | 25.1                                                                                          | 59.2                                                                                          | 2                                                                              | 2                                                                              | 17923   | 28970          | None                                                                        | Molecular function unknown               | -                     | Unclassified                     | Biological_process unknown                                                   | -                | Yes                      |
| ALDH1B1     | 219     | aldehyde dehydrogenase X, mitochondrial precursor           | NP_000683.3       | 1          | 9                 | 12         | 36     | 1.24                                                     | 1.36                                                     | 4.25                                                                                   | 4.72                                                                                   | 20.6                                                                                          | 25.2                                                                                          | 15                                                                             | 15                                                                             | 5       | 219            | aldehyde dehydrogenase 1 family, member B1                                  | Catalytic activity                       | Mitochondrion         | Enzyme: Dehydrogenase            | Metabolism;Energy pathways                                                   | -                | Yes                      |
| EIF3I       | 8668    | eukaryotic translation initiation factor 3 subunit I        | NP_003748.1       | 1          | 6                 | 7          | 12     | 1.24                                                     | 1.35                                                     | 4.16                                                                                   | 6.06                                                                                   | 12.7                                                                                          | 20.3                                                                                          | 6                                                                              | 6                                                                              | 4884    | 8668           | eukaryotic translation initiation factor 3, subunit 2, beta, 36kDa          | Translation regulator activity           | Ribosome              | Translation regulatory protein   | Protein metabolism                                                           | WD40             | Yes                      |
| CEP170      | 9859    | centrosomal protein of 170 kDa isoform beta                 | NP_001035863.1    | 2          | 1                 | 18         | 34     | 1.24                                                     | 1.35                                                     |                                                                                        |                                                                                        |                                                                                               |                                                                                               | 1                                                                              | 1                                                                              | 17172   | 9859           | KIAA0470                                                                    | Molecular function unknown               | Nucleus;Cytoplasm     | Unclassified                     | Biological_process unknown                                                   | FHA,CC           | No                       |
| RPS12       | 6206    | 40S ribosomal protein S12                                   | NP_001007.2       | 1          | 6                 | 6          | 22     | 1.24                                                     | 1.35                                                     | 4.52                                                                                   | 5.96                                                                                   | 19.6                                                                                          | 28.3                                                                                          | 12                                                                             | 12                                                                             | 4714    | 6206           | ribosomal protein S12                                                       | Structural constituent of ribosome       | Ribosome              | Ribosomal subunit                | Protein metabolism                                                           | -                | Yes                      |
| PPP4R2      | 151987  | serine/threonine-protein phosphatase 4 regulatory subunit 2 | NP_777567.1       | 1          | 7                 | 7          | 13     | 1.24                                                     | 1.33                                                     | 11.9                                                                                   | 13.55                                                                                  | 37.2                                                                                          | 46.5                                                                                          | 6                                                                              | 6                                                                              | 11453   | 151987         | protein phosphatase 4, serine/threonine phosphatase activity                | Protein phosphatase activity             | Centrosome            | Serine/threonine phosphatase     | Cell communication;Signal transduction                                       | CC               | No                       |
| TM9SF4      | 9777    | transmembrane 9 superfamily member 4 precursor              | NP_055557.2       | 1          | 8                 | 9          | 21     | 1.24                                                     | 1.31                                                     | 5                                                                                      | 7.05                                                                                   | 24.3                                                                                          | 36.8                                                                                          | 15                                                                             | 15                                                                             | 15514   | 9777           | transmembrane 9 superfamily protein member 4                                | Molecular function unknown               | Integral to membrane  | Integral membrane protein        | Biological_process unknown                                                   | TM               | Yes                      |
| UBAP2       | 55833   | ubiquitin-associated protein 2 isoform 1                    | NP_060919.3       | 3          | 8                 | 8          | 23     | 1.24                                                     | 1.26                                                     | 2.48                                                                                   | 4.24                                                                                   | 10.2                                                                                          | 17.9                                                                                          | 11                                                                             | 11                                                                             | 6748    | 55833          | ubiquitin associated protein 2                                              | Molecular function unknown               | -                     | Unclassified                     | Biological_process unknown                                                   | UBA              | No                       |
| GATAD2A     | 54815   | transcriptional repressor p66-alpha isoform 1               | NP_001287875.1    | 2          | 4                 | 5          | 10     | 1.24                                                     | 1.26                                                     | 3.79                                                                                   | 2.14                                                                                   | 6.6                                                                                           | 3.8                                                                                           | 2                                                                              | 2                                                                              | 11741   | 54815          | GATA zinc finger domain containing 2A                                       | Transcription regulator activity         | Nucleus               | Transcription regulatory protein | Regulation of nucleobase, nucleoside, nucleotide and nucleic acid metabolism | CC               | Yes                      |
| TSEN34      | 79042   | rRNA splicing endonuclease subunit Sen34 isoform 2          | NP_001269262.1    | 2          | 1                 | 1          | 2      | 1.24                                                     | 1.24                                                     |                                                                                        |                                                                                        |                                                                                               |                                                                                               | 1                                                                              | 1                                                                              | 10038   | 79042          | rRNA splicing endonuclease 34 homolog (SEN34, S. cerevisiae)                | Endonuclease activity                    | -                     | RNA endonuclease                 | Regulation of nucleobase, nucleoside, nucleotide and nucleic acid metabolism | -                | Yes                      |
| PRKD2       | 25865   | serine/threonine-protein kinase D2 isoform A                | NP_057541.2       | 2          | 5                 | 5          | 12     | 1.24                                                     | 1.22                                                     | 5.46                                                                                   | 3.19                                                                                   | 16.7                                                                                          | 9.5                                                                                           | 6                                                                              | 6                                                                              | 9523    | 25865          | protein kinase D2                                                           | Protein serine/threonine kinase activity | Cytoplasm             | Serine/threonine kinase          | Cell communication;Signal transduction                                       | Cl,PHL, T_kinase | Yes                      |
| ASNS        | 440     | asparagine synthetase [glutamine-hydrolyzing] isoform a     | NP_001664.3       | 3          | 13                | 13         | 28     | 1.24                                                     | 1.22                                                     | 2.48                                                                                   | 6.51                                                                                   | 12.4                                                                                          | 32.6                                                                                          | 16                                                                             | 16                                                                             | 153     | 440            | asparagine synthetase                                                       | Ligase activity                          | Cytoplasm             | Enzyme: Synthase                 | Protein metabolism                                                           | -                | Yes                      |
| HAUS5       | 23354   | HAUS augmin-like complex subunit 5                          | NP_056117.1       | 1          | 3                 | 3          | 5      | 1.24                                                     | 1.2                                                      | 4.02                                                                                   | 11.5                                                                                   | 8.7                                                                                           | 24.3                                                                                          | 3                                                                              | 3                                                                              | 19389   | 23354          | KIAA0841                                                                    | Molecular function unknown               | -                     | Unclassified                     | Biological_process unknown                                                   | CC               | No                       |



Supplementary Table S1. List of quantified proteins in OKF6/TERT1-Smoke cells  
 Raignanalan *et al.*, 2017. Role of protein kinase N2 (PKN2) in cigarette smoke-mediated oncogenic transformation of oral cells

| Gene Symbol | Gene ID | Protein Description                                                                    | Protein Accession | # Proteins | # Unique Peptides | # Peptides | # PSMs | OKF6/TERT1-Smoke/<br>OKF6/TERT1-Parental<br>(130/126) R1 | OKF6/TERT1-Smoke/<br>OKF6/TERT1-Parental<br>(128/127) R2 | Ratio Standard Errors [%]:<br>OKF6/TERT1-Smoke/<br>OKF6/TERT1-Parental<br>(130/126) R1 | Ratio Standard Errors [%]:<br>OKF6/TERT1-Smoke/<br>OKF6/TERT1-Parental<br>(128/127) R2 | Ratio Variabilities [%]:<br>F13: OKF6/TERT1-<br>Smoke/<br>OKF6/TERT1-Parental<br>(130/126) R1 | Ratio Variabilities [%]:<br>F13: OKF6/TERT1-<br>Smoke/<br>OKF6/TERT1-Parental<br>(128/127) R2 | Ratio Counts: F13:<br>OKF6/TERT1-Smoke/<br>OKF6/TERT1-Parental<br>(130/126) R1 | Ratio Counts: F13:<br>OKF6/TERT1-Smoke/<br>OKF6/TERT1-Parental<br>(128/127) R2 | HPRD ID | Entrez Gene Id | Gene Name                                                                       | Molecular Function                   | Primary Localization         | Molecular Class                             | Biological Process                                                           | Domains       | Plasma Proteome Database |
|-------------|---------|----------------------------------------------------------------------------------------|-------------------|------------|-------------------|------------|--------|----------------------------------------------------------|----------------------------------------------------------|----------------------------------------------------------------------------------------|----------------------------------------------------------------------------------------|-----------------------------------------------------------------------------------------------|-----------------------------------------------------------------------------------------------|--------------------------------------------------------------------------------|--------------------------------------------------------------------------------|---------|----------------|---------------------------------------------------------------------------------|--------------------------------------|------------------------------|---------------------------------------------|------------------------------------------------------------------------------|---------------|--------------------------|
| SIRT2       | 22933   | NAD-dependent protein deacetylase sirtuin-2 isoform 1                                  | NP_036369.2       | 3          | 1                 | 1          | 1      | 1.23                                                     | 1.4                                                      |                                                                                        |                                                                                        |                                                                                               |                                                                                               | 1                                                                              | 1                                                                              | 10377   | 22933          | sirtuin (silent mating type information regulator 2, homolog) 2 (S. cerevisiae) | Deacetylase activity                 | Cytoplasm                    | Cell cycle control protein                  | Cell communication;Signal transduction                                       | -             | Yes                      |
| SERPINB9    | 5272    | serpin B9                                                                              | NP_004146.1       | 4          | 4                 | 6          | 10     | 1.23                                                     | 1.39                                                     | 14.43                                                                                  | 5.49                                                                                   | 31.4                                                                                          | 13.3                                                                                          | 3                                                                              | 3                                                                              | 3480    | 5272           | serine (or cysteine) proteinase inhibitor, clade B (ovalbumin), member 9        | Protease inhibitor activity          | Cytoplasm                    | Protease inhibitor                          | Protein metabolism                                                           | SERPIN        | Yes                      |
| DMPA1       | 55929   | DNA methyltransferase 1-associated protein 1                                           | NP_061973.1       | 1          | 2                 | 2          | 4      | 1.23                                                     | 1.37                                                     | 1.86                                                                                   | 25.17                                                                                  | 3.2                                                                                           | 51.6                                                                                          | 2                                                                              | 2                                                                              | 5465    | 55929          | DNA methyltransferase 1 associated protein 1                                    | Transcription regulator activity     | Nucleus                      | Transcription regulatory protein            | Regulation of nucleobase, nucleoside, nucleotide and nucleic acid metabolism | SANT,CC       | Yes                      |
| SSRP1       | 6749    | FACT complex subunit SSRP1                                                             | NP_003137.1       | 1          | 18                | 18         | 58     | 1.23                                                     | 1.34                                                     | 3.46                                                                                   | 2.56                                                                                   | 22.4                                                                                          | 17.9                                                                                          | 27                                                                             | 27                                                                             | 5061    | 6749           | structure specific recognition protein 1                                        | Transcription factor activity        | Nucleus                      | Transcription factor                        | Regulation of nucleobase, nucleoside, nucleotide and nucleic acid metabolism | HMG,CC        | Yes                      |
| CBL         | 867     | E3 ubiquitin-protein ligase CBL                                                        | NP_005179.2       | 1          | 5                 | 5          | 9      | 1.23                                                     | 1.31                                                     | 4.81                                                                                   | 1.2                                                                                    | 13.2                                                                                          | 3.5                                                                                           | 5                                                                              | 5                                                                              | 1320    | 867            | Cas-B-M (murine) oncogenic retroviral transforming sequence                     | Ubiquitin-specific protease activity | Cytoplasm                    | Ubiquitin proteasome system protein         | Cell communication;Signal transduction;Protein metabolism                    | RING,UBA      | Yes                      |
| PRAF2       | 11230   | PRA1 family protein 2                                                                  | NP_009144.1       | 1          | 2                 | 2          | 3      | 1.23                                                     | 1.28                                                     |                                                                                        |                                                                                        |                                                                                               |                                                                                               | 1                                                                              | 1                                                                              | 6596    | 11230          | PRA1 domain family, member 2                                                    | Molecular function unknown           | -                            | Integral membrane protein                   | Biological process unknown                                                   | TM            | Yes                      |
| ALDOC       | 230     | fructose-bisphosphate aldolase C                                                       | NP_005156.1       | 1          | 12                | 17         | 135    | 1.23                                                     | 1.26                                                     | 1.18                                                                                   | 6.44                                                                                   | 5.8                                                                                           | 33.3                                                                                          | 16                                                                             | 16                                                                             | 2386    | 230            | aldolase C, fructose-bisphosphate                                               | Lyase activity                       | Mitochondrion                | Enzyme: Lyase                               | Metabolism;Energy pathways                                                   | -             | Yes                      |
| SARS        | 6301    | serine-tRNA ligase, cytoplasmic                                                        | NP_006504.2       | 1          | 18                | 18         | 58     | 1.23                                                     | 1.25                                                     | 3.88                                                                                   | 5.9                                                                                    | 24.2                                                                                          | 38.3                                                                                          | 25                                                                             | 25                                                                             | 9605    | 6301           | seryl-tRNA synthetase                                                           | Ligase activity                      | Cytoplasm                    | Enzyme: Ligase                              | Metabolism;Energy pathways                                                   | -             | Yes                      |
| NCBP2       | 22916   | nuclear cap-binding protein subunit 2 isoform 1                                        | NP_031388.2       | 2          | 1                 | 1          | 1      | 1.23                                                     | 1.24                                                     |                                                                                        |                                                                                        |                                                                                               |                                                                                               | 1                                                                              | 1                                                                              | 5503    | 22916          | nuclear cap binding protein subunit 2, 20kDa                                    | RNA binding                          | Nucleus                      | RNA binding protein                         | Regulation of nucleobase, nucleoside, nucleotide and nucleic acid metabolism | RRM           | Yes                      |
| UEVLD       | 55293   | ubiquitin-conjugating enzyme E2 variant 3 isoform a                                    | NP_001035787.1    | 8          | 4                 | 4          | 6      | 1.23                                                     | 1.22                                                     | 7.18                                                                                   | 5.73                                                                                   | 17.8                                                                                          | 14                                                                                            | 4                                                                              | 4                                                                              | 15608   | 55293          | None                                                                            | Ubiquitin-specific protease activity | -                            | Ubiquitin proteasome system protein         | Protein metabolism                                                           | UBC           | No                       |
| LYAR        | 55646   | cell growth-regulating nucleolar protein                                               | NP_060286.1       | 1          | 15                | 15         | 28     | 1.23                                                     | 1.22                                                     | 1.75                                                                                   | 5.29                                                                                   | 8.7                                                                                           | 26.4                                                                                          | 16                                                                             | 16                                                                             | 10064   | 55646          | None                                                                            | Transcription regulator activity     | Nucleolus                    | Transcription regulatory protein            | Regulation of nucleobase, nucleoside, nucleotide and nucleic acid metabolism | CC            | No                       |
| RMDN3       | 55177   | regulator of microtubule dynamics protein 3                                            | NP_060615.1       | 1          | 7                 | 7          | 19     | 1.23                                                     | 1.17                                                     | 8.45                                                                                   | 3.69                                                                                   | 35.5                                                                                          | 14.4                                                                                          | 11                                                                             | 11                                                                             |         |                |                                                                                 |                                      |                              |                                             |                                                                              |               |                          |
| UTP14A      | 10813   | U3 small nuclear RNA-associated protein 14 homolog A isoform 1                         | NP_006640.2       | 3          | 14                | 14         | 27     | 1.23                                                     | 1.17                                                     | 6.03                                                                                   | 7.64                                                                                   | 28.4                                                                                          | 34.3                                                                                          | 14                                                                             | 14                                                                             | 6712    | 10813          | UTP14, U3 small nuclear ribonucleoprotein, homolog A (yeast)                    | Molecular function unknown           | Ribosome                     | Unclassified                                | Biological process unknown                                                   | CC            | Yes                      |
| AURKAIP1    | 54998   | aurora kinase A-interacting protein                                                    | NP_060370.1       | 1          | 1                 | 1          | 2      | 1.23                                                     | 1.17                                                     |                                                                                        |                                                                                        |                                                                                               |                                                                                               | 1                                                                              | 1                                                                              | 16457   | 54998          | None                                                                            | Enzyme regulator activity            | Nucleus                      | Enzyme regulator;Cell cycle control protein | Regulation of enzyme activity;Cell communication;Signal transduction         | NLS           | No                       |
| DDOST       | 1650    | dolichyl-diphosphooligosaccharide-protein glycosyltransferase 48 kDa subunit precursor | NP_005207.2       | 1          | 10                | 10         | 43     | 1.23                                                     | 1.17                                                     | 1.21                                                                                   | 1.98                                                                                   | 6.8                                                                                           | 10.6                                                                                          | 21                                                                             | 21                                                                             | 3728    | 1650           | dolichyl-diphosphooligosaccharide-proteoglycosyltransferase                     | Galactosyltransferase activity       | Endoplasmic reticulum        | Enzyme: Galactosyltransferase               | Metabolism;Energy pathways                                                   | SP;TM         | Yes                      |
| CD47        | 961     | leukocyte surface antigen CD47 isoform 1 precursor                                     | NP_001768.1       | 2          | 4                 | 4          | 10     | 1.23                                                     | 1.15                                                     | 10.41                                                                                  | 14.33                                                                                  | 34.9                                                                                          | 45.8                                                                                          | 7                                                                              | 7                                                                              | 3017    | 961            | CD47 antigen (Rb-related antigen, integrin-associated signal transducer)        | Molecular function unknown           | Plasma membrane;Cell surface | Unclassified                                | Immune response                                                              | TM;SP;Ig_LIKE | Yes                      |
| PRRC1       | 133619  | protein PRRC1 isoform 1                                                                | NP_001273737.1    | 2          | 5                 | 5          | 28     | 1.23                                                     | 1.13                                                     | 3.36                                                                                   | 2.8                                                                                    | 13.7                                                                                          | 10.5                                                                                          | 11                                                                             | 11                                                                             | 14052   | 133619         | None                                                                            | Molecular function unknown           | Golgi apparatus              | Unclassified                                | Biological process unknown                                                   | -             | No                       |
| NCOA5       | 57727   | nuclear receptor coactivator 5                                                         | NP_066018.1       | 1          | 7                 | 7          | 16     | 1.23                                                     | 1.12                                                     | 5.83                                                                                   | 11.51                                                                                  | 16.1                                                                                          | 29.4                                                                                          | 5                                                                              | 5                                                                              | 14813   | 57727          | nuclear receptor coactivator 5                                                  | Transcription regulator activity     | Nucleus                      | Transcription regulatory protein            | Regulation of nucleobase, nucleoside, nucleotide and nucleic acid metabolism | CC            | Yes                      |
| GIGYF2      | 26058   | PERQ amino acid-rich with GYF domain-containing protein 2 isoform b                    | NP_056390.2       | 3          | 15                | 15         | 36     | 1.23                                                     | 1.12                                                     | 1.93                                                                                   | 4.63                                                                                   | 10.7                                                                                          | 23.5                                                                                          | 20                                                                             | 20                                                                             | 11639   | 26058          | trinucleotide repeat containing 15                                              | Molecular function unknown           | Nucleus                      | Unclassified                                | Cell communication;Signal transduction                                       | CC            | No                       |
| ATXN3       | 4287    | ataxin-3 reference isoform                                                             | NP_004984.2       | 10         | 4                 | 4          | 6      | 1.23                                                     | 1.1                                                      | 13.46                                                                                  | 6.33                                                                                   | 23.7                                                                                          | 9.9                                                                                           | 2                                                                              | 2                                                                              | 6131    | 4287           | ataxin 3                                                                        | Ubiquitin-specific protease activity | Nucleus                      | Protease                                    | Protein metabolism                                                           | UM,CC         | Yes                      |
| GNE         | 10020   | bifunctional UDP-N-acetylglucosamine 2-epimerase/N-acetylmannosamine kinase isoform 1  | NP_001121699.1    | 5          | 3                 | 3          | 10     | 1.23                                                     | 1.08                                                     | 8.14                                                                                   | 8.38                                                                                   | 22.7                                                                                          | 20.5                                                                                          | 5                                                                              | 5                                                                              | 4825    | 10020          | glucosamine(UDP-N-acetyl)-2-epimerase/N-acetylmannosamine kinase                | Racemase and epimerase activity      | Cytoplasm                    | Enzyme: Epimerase                           | Metabolism;Energy pathways                                                   | -             | Yes                      |
| ACBD6       | 84320   | acyl-CoA-binding domain-containing protein 6                                           | NP_115736.1       | 1          | 2                 | 2          | 3      | 1.23                                                     | 1.07                                                     | 11                                                                                     | 4.83                                                                                   | 19.3                                                                                          | 7.3                                                                                           | 2                                                                              | 2                                                                              | 12416   | 84320          | acyl-Coenzyme A binding domain containing 6                                     | Molecular function unknown           | -                            | Unclassified                                | Biological process unknown                                                   | ANK           | No                       |
| STRAP       | 11171   | serine-threonine kinase receptor-associated protein                                    | NP_009109.3       | 1          | 13                | 13         | 34     | 1.23                                                     | 1.06                                                     | 5.85                                                                                   | 8.3                                                                                    | 31.3                                                                                          | 38.6                                                                                          | 18                                                                             | 18                                                                             | 5816    | 11171          | serine/threonine kinase receptor associated protein                             | Receptor binding                     | Cytoplasm                    | Cell cycle control protein                  | Cell communication;Signal transduction                                       | WD40          | Yes                      |
| COPZ1       | 22818   | coatamer subunit zeta-1 isoform 4                                                      | NP_001258665.1    | 4          | 5                 | 5          | 26     | 1.23                                                     | 1.05                                                     | 2.18                                                                                   | 9.36                                                                                   | 9.7                                                                                           | 36.6                                                                                          | 13                                                                             | 13                                                                             | 16738   | 22818          | coatamer protein complex, subunit zeta 1                                        | Transporter activity                 | Cytoplasm                    | Transport/cargo protein                     | Transport                                                                    | -             | No                       |



Supplementary Table S1. List of quantified proteins in OKF6/TERT1-Smoke cells  
 Raingopaln *et al.*, 2017. Role of protein kinase N2 (PKN2) in cigarette smoke-mediated oncogenic transformation of oral cells

| Gene Symbol | Gene ID | Protein Description                                                           | Protein Accession | # Proteins | # Unique Peptides | # Peptides | # PSMs | OKF6/TERT1-Smoke/<br>OKF6/TERT1-Parental<br>(130/126) R1 | OKF6/TERT1-Smoke/<br>OKF6/TERT1-Parental<br>(128/127) R2 | Ratio Standard Errors [%]:<br>OKF6/TERT1-Smoke/<br>OKF6/TERT1-Parental<br>(130/126) R1 | Ratio Standard Errors [%]:<br>OKF6/TERT1-Smoke/<br>OKF6/TERT1-Parental<br>(128/127) R2 | Ratio Variabilities [%]:<br>F13: OKF6/TERT1-<br>Smoke/<br>OKF6/TERT1-Parental<br>(130/126) R1 | Ratio Variabilities [%]:<br>F13: OKF6/TERT1-<br>Smoke/<br>OKF6/TERT1-Parental<br>(128/127) R2 | Ratio Counts: F13:<br>OKF6/TERT1-Smoke/<br>OKF6/TERT1-Parental<br>(130/126) R1 | Ratio Counts: F13:<br>OKF6/TERT1-Smoke/<br>OKF6/TERT1-Parental<br>(128/127) R2 | HPRD ID | Entrez Gene Id | Gene Name                                                                    | Molecular Function                                | Primary Localization  | Molecular Class                            | Biological Process                                                                         | Domains             | Plasma Proteome Database |
|-------------|---------|-------------------------------------------------------------------------------|-------------------|------------|-------------------|------------|--------|----------------------------------------------------------|----------------------------------------------------------|----------------------------------------------------------------------------------------|----------------------------------------------------------------------------------------|-----------------------------------------------------------------------------------------------|-----------------------------------------------------------------------------------------------|--------------------------------------------------------------------------------|--------------------------------------------------------------------------------|---------|----------------|------------------------------------------------------------------------------|---------------------------------------------------|-----------------------|--------------------------------------------|--------------------------------------------------------------------------------------------|---------------------|--------------------------|
| EIF6        | 3692    | eukaryotic translation initiation factor 6 isoform a                          | NP_002203.1       | 2          | 7                 | 7          | 44     | 1.22                                                     | 1.16                                                     | 2.92                                                                                   | 8.31                                                                                   | 15.6                                                                                          | 43.8                                                                                          | 19                                                                             | 19                                                                             | 4221    | 3692           | integrin beta 4 binding protein                                              | Translation regulator activity                    | Cytoplasm             | Translation regulatory protein             | Regulation of translation                                                                  | -                   | Yes                      |
| QKI         | 9444    | protein quaking isoform 1                                                     | NP_006766.1       | 5          | 2                 | 2          | 5      | 1.22                                                     | 1.15                                                     | 7.91                                                                                   | 5.49                                                                                   | 16.8                                                                                          | 11                                                                                            | 3                                                                              | 3                                                                              | 6691    | 9444           | quaking homolog, KH domain RNA binding (mouse)                               | RNA binding                                       | Cytoplasm             | RNA binding protein                        | RNA metabolism                                                                             | KH                  | Yes                      |
| SAFB        | 6294    | scaffold attachment factor B1 isoform 1                                       | NP_001188267.1    | 4          | 10                | 18         | 41     | 1.22                                                     | 1.13                                                     | 3.07                                                                                   | 3.9                                                                                    | 13                                                                                            | 15.4                                                                                          | 12                                                                             | 12                                                                             | 4205    | 6294           | scaffold attachment factor B                                                 | Transcription factor activity                     | Nucleus               | Transcription factor                       | Regulation of nucleobase, nucleotide and nucleic acid metabolism                           | RRM;SAP-CC          | Yes                      |
| EEFIG       | 1937    | elongation factor 1-gamma                                                     | NP_001395.1       | 1          | 13                | 13         | 88     | 1.22                                                     | 1.12                                                     | 2.33                                                                                   | 4.23                                                                                   | 20.7                                                                                          | 35.2                                                                                          | 52                                                                             | 52                                                                             | 11745   | 1937           | eukaryotic translation elongation factor 1 gamma                             | Translation regulator activity                    | Cytoplasm             | Translation regulatory protein             | Protein metabolism                                                                         | -                   | Yes                      |
| RPRD1A      | 55197   | regulation of nuclear pre-mRNA domain-containing protein 1A isoform 1         | NP_060640.2       | 3          | 3                 | 4          | 11     | 1.22                                                     | 1.12                                                     | 6.56                                                                                   | 6.87                                                                                   | 13.9                                                                                          | 13.4                                                                                          | 3                                                                              | 3                                                                              | 10134   | 55197          | None                                                                         | Molecular function unknown                        | Nucleus               | Unclassified                               | Regulation of nucleobase, nucleotide and nucleic acid metabolism; Regulation of cell cycle | CC                  | No                       |
| ZNF428      | 126299  | zinc finger protein 428                                                       | NP_872304.2       | 1          | 2                 | 2          | 3      | 1.22                                                     | 1.12                                                     | 13.67                                                                                  | 10.7                                                                                   | 23.8                                                                                          | 17.1                                                                                          | 2                                                                              | 2                                                                              | 14671   | 126299         | None                                                                         | DNA binding                                       | Nucleus               | DNA binding protein                        | Regulation of nucleobase, nucleotide and nucleic acid metabolism                           | ZNFC2               | No                       |
| CHORDC1     | 26973   | cysteine and histidine-rich domain-containing protein 1 isoform a             | NP_036256.2       | 2          | 6                 | 6          | 14     | 1.22                                                     | 1.11                                                     | 1.63                                                                                   | 11.75                                                                                  | 5.3                                                                                           | 35.6                                                                                          | 7                                                                              | 7                                                                              | 5072    | 26973          | cysteine and histidine-rich domain(CHORD)-containing, zinc binding protein 1 | Molecular function unknown                        | -                     | Unclassified                               | Biological process unknown                                                                 | CC                  | Yes                      |
| ATP2B1      | 490     | plasma membrane calcium-transporting ATPase 1 isoform 1b                      | NP_001673.2       | 6          | 8                 | 14         | 37     | 1.22                                                     | 1.06                                                     | 2.11                                                                                   | 10.16                                                                                  | 7.3                                                                                           | 31.3                                                                                          | 8                                                                              | 8                                                                              | 158     | 490            | ATPase, Ca++ transporting, plasma membrane 1                                 | ATPase activity                                   | Plasma membrane       | ATPase                                     | Transport                                                                                  | TM;CC               | Yes                      |
| PIGT        | 51604   | GPI transamidase component PIG-T isoform 1 precursor                          | NP_057021.2       | 4          | 5                 | 5          | 8      | 1.22                                                     | 1.03                                                     | 16.65                                                                                  | 6.32                                                                                   | 42.2                                                                                          | 13                                                                                            | 4                                                                              | 4                                                                              | 15136   | 51604          | phosphatidylinositol of glycan, class T                                      | Transaminase activity                             | Endoplasmic reticulum | Enzyme: Aminotransferase                   | Protein metabolism                                                                         | SP;TM               | Yes                      |
| TBL3        | 10607   | transducin beta-like protein 3                                                | NP_006444.2       | 1          | 11                | 11         | 41     | 1.22                                                     | 1.01                                                     | 4.56                                                                                   | 6.63                                                                                   | 24.6                                                                                          | 29.9                                                                                          | 19                                                                             | 19                                                                             | 9327    | 10607          | transducin (beta)-like 3                                                     | Molecular function unknown                        | Nucleolus             | Unclassified                               | Biological process unknown                                                                 | WD40                | Yes                      |
| BCAT2       | 587     | branched-chain-amino-acid aminotransferase, mitochondrial isoform a precursor | NP_001181.2       | 3          | 6                 | 6          | 30     | 1.22                                                     | 0.99                                                     | 4.43                                                                                   | 15.37                                                                                  | 22.6                                                                                          | 69.1                                                                                          | 17                                                                             | 17                                                                             | 217     | 587            | branched chain aminotransferase 2, mitochondrial                             | Transaminase activity                             | Mitochondrion         | Enzyme: Aminotransferase                   | Metabolism;Energy pathways                                                                 | SP;CXCC             | Yes                      |
| PGM3        | 5238    | phosphocetylglucosamine mutase isoform 1                                      | NP_001186846.1    | 4          | 15                | 15         | 33     | 1.22                                                     | 0.99                                                     | 6.85                                                                                   | 8.28                                                                                   | 34.5                                                                                          | 33.8                                                                                          | 16                                                                             | 16                                                                             | 1390    | 5238           | phosphoglucomutase 3                                                         | Catalytic activity                                | Cytoplasm             | Enzyme: Mutase                             | Metabolism;Energy pathways                                                                 | CC                  | Yes                      |
| COG5        | 10466   | conserved oligomeric Golgi complex subunit 5 isoform 1                        | NP_006393.3       | 3          | 7                 | 7          | 14     | 1.22                                                     | 0.91                                                     | 8.63                                                                                   | 15.15                                                                                  | 28.4                                                                                          | 37.9                                                                                          | 7                                                                              | 7                                                                              | 8436    | 10466          | component of oligomeric golgi complex 5                                      | Transporter activity;Structural molecule activity | Golgi apparatus       | Structural protein;Transport/cargo protein | Transport;Golgi organization and biogenesis                                                | -                   | Yes                      |
| RNF31       | 55072   | E3 ubiquitin-protein ligase RNF31                                             | NP_060469.4       | 1          | 2                 | 2          | 2      | 1.22                                                     | 0.88                                                     | 9.3                                                                                    | 35.64                                                                                  | 16.2                                                                                          | 46.5                                                                                          | 2                                                                              | 2                                                                              | 11516   | 55072          | ring finger protein 31                                                       | Molecular function unknown                        | -                     | Unclassified                               | Biological process unknown                                                                 | ZnF_RBZ;UBA1 BR     | Yes                      |
| POLR2F      | 5435    | DNA-directed RNA polymerases I, II, and III subunit RPABC2 isoform 1          | NP_068809.1       | 2          | 1                 | 1          | 1      | 1.22                                                     | 0.85                                                     |                                                                                        |                                                                                        |                                                                                               |                                                                                               | 1                                                                              | 1                                                                              | 5105    | 5435           | polymerase (RNA) II (DNA directed) polypeptideF                              | DNA-directed RNA polymerase activity              | Nucleus               | RNA polymerase                             | Regulation of nucleobase, nucleotide and nucleic acid metabolism                           | -                   | No                       |
| ZNF281      | 23528   | zinc finger protein 281 isoform 1                                             | NP_036614.1       | 2          | 5                 | 5          | 9      | 1.22                                                     | 0.85                                                     | 8.23                                                                                   | 13.08                                                                                  | 22.8                                                                                          | 25.3                                                                                          | 5                                                                              | 5                                                                              | 11702   | 23528          | zinc finger protein 281                                                      | Transcription regulator activity                  | Nucleus               | Transcription regulatory protein           | Regulation of nucleobase, nucleotide and nucleic acid metabolism                           | ZNFC2               | Yes                      |
| LARP4       | 113251  | la-related protein 4 isoform a                                                | NP_443111.4       | 6          | 5                 | 5          | 13     | 1.22                                                     | 0.81                                                     | 6.38                                                                                   | 10.69                                                                                  | 22.2                                                                                          | 24.9                                                                                          | 8                                                                              | 8                                                                              | 17289   | 113251         | None                                                                         | RNA binding                                       | Nucleus;Cytoplasm     | RNA binding protein                        | Regulation of nucleobase, nucleotide and nucleic acid metabolism                           | LA;RRM              | No                       |
| PIP4K2B     | 8396    | phosphatidylinositol 5-phosphate 4-kinase type-2 beta                         | NP_003550.1       | 2          | 6                 | 6          | 10     | 1.22                                                     | 0.8                                                      | 2.41                                                                                   | 12.15                                                                                  | 7.2                                                                                           | 24                                                                                            | 6                                                                              | 6                                                                              | 4463    | 8396           | phosphatidylinositol 4-4-phosphate 5-kinase, type II, beta                   | Lipid kinase activity                             | Plasma membrane       | Lipid Kinase                               | Cell communication;Signal transduction                                                     | PIPKc;CC            | Yes                      |
| TRIP12      | 9320    | E3 ubiquitin-protein ligase TRIP12 isoform a                                  | NP_001271143.1    | 5          | 8                 | 9          | 22     | 1.22                                                     | 0.8                                                      | 4.9                                                                                    | 13.38                                                                                  | 17                                                                                            | 31.1                                                                                          | 8                                                                              | 8                                                                              | 5144    | 9320           | thyroid hormone receptor interactor 12                                       | Transcription regulator activity                  | Nucleus               | Transcription regulatory protein           | Regulation of nucleobase, nucleotide and nucleic acid metabolism                           | HECT;CC             | Yes                      |
| COL6A3      | 1293    | collagen alpha-3(VI) chain isoform 1 precursor                                | NP_004360.2       | 5          | 3                 | 3          | 5      | 1.22                                                     | 0.78                                                     | 25.89                                                                                  | 9.38                                                                                   | 59                                                                                            | 12.7                                                                                          | 3                                                                              | 3                                                                              | 371     | 1293           | collagen, type VI alpha 3                                                    | Extracellular matrix structural constituent       | Extracellular         | Extracellular matrix protein               | Cell growth and/or maintenance                                                             | KUNITZ;SP;VW A;COLL | Yes                      |
| GNP5        | 2787    | guanine nucleotide-binding protein G(i)(S)/G(o) subunit gamma-5 precursor     | NP_005265.1       | 1          | 4                 | 4          | 7      | 1.22                                                     | 0.7                                                      | 5.52                                                                                   | 6.33                                                                                   | 13.5                                                                                          | 8.9                                                                                           | 4                                                                              | 4                                                                              | 11865   | 2787           | guanine nucleotide binding protein(G protein),gamma 5                        | GTPase activity                                   | Integral to membrane  | G protein                                  | Cell communication;Signal transduction                                                     | -                   | No                       |
| PEA15       | 8682    | astrocytic phosphoprotein PEA-15 isoform a                                    | NP_001284505.1    | 3          | 4                 | 4          | 6      | 1.22                                                     | 0.63                                                     | 1.61                                                                                   | 10.28                                                                                  | 3.4                                                                                           | 11.2                                                                                          | 3                                                                              | 3                                                                              | 4579    | 8682           | phosphoprotein enriched in astrocytes 15                                     | Transporter activity                              | Cytoplasm             | Transport/cargo protein                    | Cell communication;Signal transduction                                                     | DED;NES             | Yes                      |
| SMAD3       | 4088    | mothers against decapentaplegic homolog 3 isoform 1                           | NP_005893.1       | 4          | 1                 | 3          | 11     | 1.22                                                     | 0.57                                                     | 3.37                                                                                   | 12.47                                                                                  | 5.8                                                                                           | 10.2                                                                                          | 2                                                                              | 2                                                                              | 4380    | 4088           | SMAD, mothers against DPP homolog 3(Drosophila)                              | Transcription regulator activity                  | Nucleus               | Transcription regulatory protein           | Regulation of nucleobase, nucleotide and nucleic acid metabolism                           | MH1;MH2             | No                       |





Supplementary Table S1. List of quantified proteins in OKF6/TERT1-Smoke cells  
 Raingonalan *et al.*, 2017. Role of protein kinase N2 (PKN2) in cigarette smoke-mediated oncogenic transformation of oral cells

| Gene Symbol | Gene ID | Protein Description                                                 | Protein Accession | # Proteins | # Unique Peptides | # Peptides | # PSMs | OKF6/TERT1-Smoke/<br>OKF6/TERT1-Parental<br>(130/126) R1 | OKF6/TERT1-Smoke/<br>OKF6/TERT1-Parental<br>(128/127) R2 | Ratio Standard Errors [%]:<br>OKF6/TERT1-Smoke/<br>OKF6/TERT1-Parental<br>(130/126) R1 | Ratio Standard Errors [%]:<br>OKF6/TERT1-Smoke/<br>OKF6/TERT1-Parental<br>(128/127) R2 | Ratio Variabilities [%]:<br>F13: OKF6/TERT1-<br>Smoke/<br>OKF6/TERT1-Parental<br>(130/126) R1 | Ratio Variabilities [%]:<br>F13: OKF6/TERT1-<br>Smoke/<br>OKF6/TERT1-Parental<br>(128/127) R2 | Ratio Counts: F13:<br>OKF6/TERT1-Smoke/<br>OKF6/TERT1-Parental<br>(130/126) R1 | Ratio Counts: F13:<br>OKF6/TERT1-Smoke/<br>OKF6/TERT1-Parental<br>(128/127) R2 | HPRD ID | Entrez Gene Id | Gene Name                                                                            | Molecular Function                           | Primary Localization           | Molecular Class                    | Biological Process                                                           | Domains                      | Plasma Proteome Database |
|-------------|---------|---------------------------------------------------------------------|-------------------|------------|-------------------|------------|--------|----------------------------------------------------------|----------------------------------------------------------|----------------------------------------------------------------------------------------|----------------------------------------------------------------------------------------|-----------------------------------------------------------------------------------------------|-----------------------------------------------------------------------------------------------|--------------------------------------------------------------------------------|--------------------------------------------------------------------------------|---------|----------------|--------------------------------------------------------------------------------------|----------------------------------------------|--------------------------------|------------------------------------|------------------------------------------------------------------------------|------------------------------|--------------------------|
| MEF2D       | 4209    | myocyte-specific enhancer factor 2D isoform 1                       | NP_005911.1       | 10         | 1                 | 1          | 1      | 1.2                                                      | 1.13                                                     |                                                                                        |                                                                                        |                                                                                               |                                                                                               | 1                                                                              | 1                                                                              | 2810    | 4209           | MADS box transcription enhancer factor 2, polypeptide D (myocyte enhancer factor 2D) | Transcription regulator activity             | Nucleus                        | Transcription regulatory protein   | Transcription                                                                | -                            | Yes                      |
| APOBEC3G    | 60489   | DNA dC->dU-editing enzyme APOBEC-3G                                 | NP_068594.1       | 2          | 2                 | 3          | 3      | 1.2                                                      | 1.11                                                     |                                                                                        |                                                                                        |                                                                                               |                                                                                               | 1                                                                              | 1                                                                              | 6172    | 60489          | apolipoprotein B mRNA editing enzyme, catalytic polypeptide-like 3G                  | RNA binding                                  | Nucleus                        | RNA binding protein                | Regulation of nucleobase, nucleoside, nucleotide and nucleic acid metabolism | -                            | Yes                      |
| SAV1        | 60485   | protein salvador homolog 1                                          | NP_068590.1       | 1          | 1                 | 1          | 2      | 1.2                                                      | 1.1                                                      |                                                                                        |                                                                                        |                                                                                               |                                                                                               | 1                                                                              | 1                                                                              | 6229    | 60485          | salvador homolog 1 (Drosophila)                                                      | Transcription regulator activity             | Nucleus                        | Transcription regulatory protein   | Regulation of nucleobase, nucleoside, nucleotide and nucleic acid metabolism | WW,CC                        | Yes                      |
| KPNA2       | 3838    | importin subunit alpha-1                                            | NP_002257.1       | 1          | 9                 | 9          | 34     | 1.2                                                      | 1.09                                                     | 2.18                                                                                   | 4.28                                                                                   | 11.1                                                                                          | 20                                                                                            | 18                                                                             | 18                                                                             | 2818    | 3838           | karyopherin alpha 2 (RAG cohort 1, importin alpha 1)                                 | Transporter activity                         | Cytoplasm                      | Transport/cargo protein            | Cell communication, Signal transduction                                      | ARM                          | Yes                      |
| ARHGEF2     | 9181    | rho guanine nucleotide exchange factor 2 isoform 1                  | NP_001155855.1    | 3          | 9                 | 9          | 18     | 1.2                                                      | 1.06                                                     | 4.64                                                                                   | 10.86                                                                                  | 18.6                                                                                          | 39.7                                                                                          | 11                                                                             | 11                                                                             | 10458   | 9181           | rho/rae guanine nucleotide exchange factor(GEF) 2                                    | Guanyl-nucleotide exchange factor activity   | Cytoskeleton                   | Guanine nucleotide exchange factor | Cell communication, Signal transduction                                      | CC,C1,RHOGEF,PH              | Yes                      |
| APAF1       | 317     | apoptotic protease-activating factor 1 isoform c                    | NP_863651.1       | 5          | 3                 | 3          | 4      | 1.2                                                      | 1.05                                                     | 4                                                                                      | 27.15                                                                                  | 6.8                                                                                           | 42.2                                                                                          | 2                                                                              | 2                                                                              | 3755    | 317            | apoptotic protease activating factor                                                 | Receptor signaling complex scaffold activity | Cytoplasm;Nucleus              | Adapter molecule                   | Anti-apoptosis                                                               | CARD;WD40                    | Yes                      |
| MTR         | 4548    | methionine synthase isoform 1                                       | NP_000245.2       | 3          | 8                 | 8          | 18     | 1.2                                                      | 1.05                                                     | 6.05                                                                                   | 14.53                                                                                  | 22                                                                                            | 48.2                                                                                          | 9                                                                              | 9                                                                              | 1136    | 4548           | 5-methyltetrahydrofolate-homocysteine methyltransferase                              | Methyltransferase activity                   | Cytoplasm                      | Enzyme: Methyltransferase          | Metabolism;Energy pathways                                                   | -                            | Yes                      |
| CPSF7       | 79869   | cleavage and polyadenylation specificity factor subunit 7 isoform 1 | NP_079087.3       | 3          | 8                 | 8          | 20     | 1.2                                                      | 1.03                                                     | 4.32                                                                                   | 9.99                                                                                   | 17.4                                                                                          | 35                                                                                            | 11                                                                             | 11                                                                             | 16906   | 79869          | None                                                                                 | Molecular function unknown                   | -                              | Unclassified                       | Biological process unknown                                                   | RRM                          | No                       |
| BCAP29      | 55973   | B-cell receptor-associated protein 29 isoform a                     | NP_001008405.1    | 2          | 3                 | 3          | 3      | 1.2                                                      | 1.02                                                     | 18.37                                                                                  | 28.25                                                                                  | 31.9                                                                                          | 42.7                                                                                          | 2                                                                              | 2                                                                              | 16541   | 55973          | B-cell receptor-associated protein 29                                                | Molecular function unknown                   | Endoplasmic reticulum membrane | Integral membrane protein          | Biological process unknown                                                   | TM,CC                        | Yes                      |
| SPATS2L     | 26010   | SPATS2-like protein isoform d                                       | NP_001269673.1    | 3          | 1                 | 15         | 32     | 1.2                                                      | 1.01                                                     |                                                                                        |                                                                                        |                                                                                               |                                                                                               | 1                                                                              | 1                                                                              | 10916   | 26010          | None                                                                                 | Molecular function unknown                   | Nucleus                        | Unclassified                       | Biological process unknown                                                   | CC                           | Yes                      |
| NCOR1       | 9611    | nuclear receptor co-repressor 1 isoform 1                           | NP_006302.2       | 2          | 3                 | 3          | 9      | 1.2                                                      | 1.01                                                     | 7.46                                                                                   | 4.47                                                                                   | 18.1                                                                                          | 9                                                                                             | 4                                                                              | 4                                                                              | 2911    | 9611           | nuclear receptor co-repressor 1                                                      | Transcription factor activity                | Nucleus;Cytoplasm              | Transcription factor               | Regulation of nucleobase, nucleoside, nucleotide and nucleic acid metabolism | SANT,CC                      | Yes                      |
| LIG3        | 3980    | DNA ligase 3 isoform alpha precursor                                | NP_039269.2       | 2          | 4                 | 4          | 8      | 1.2                                                      | 1                                                        | 5.96                                                                                   | 1.68                                                                                   | 14.4                                                                                          | 3.4                                                                                           | 4                                                                              | 4                                                                              | 2966    | 3980           | ligase III, DNA, ATP-dependent                                                       | DNA ligase activity                          | Nucleus                        | DNA ligase                         | Regulation of nucleobase, nucleoside, nucleotide and nucleic acid metabolism | BRCT                         | Yes                      |
| EXOSC9      | 5393    | exosome complex component RRP45 isoform 1                           | NP_001029366.1    | 2          | 2                 | 2          | 7      | 1.2                                                      | 0.97                                                     | 1.11                                                                                   | 3.7                                                                                    | 2.3                                                                                           | 6.2                                                                                           | 3                                                                              | 3                                                                              | 7315    | 5393           | exosome component 9                                                                  | Ribonuclease activity                        | Nucleolus                      | Ribonuclease                       | Regulation of nucleobase, nucleoside, nucleotide and nucleic acid metabolism | NLS                          | Yes                      |
| BAZ2A       | 11176   | bromodomain adjacent to zinc finger domain protein 2A isoform 1     | NP_038477.2       | 2          | 1                 | 1          | 3      | 1.2                                                      | 0.96                                                     | 4.95                                                                                   | 2.2                                                                                    | 8.4                                                                                           | 3                                                                                             | 2                                                                              | 2                                                                              | 10417   | 11176          | bromodomain adjacent to zinc finger domain, 2A                                       | Transcription regulator activity             | Nucleolus                      | Transcription regulatory protein   | Regulation of nucleobase, nucleoside, nucleotide and nucleic acid metabolism | MBD;AT_hook;C;PHD;BROMO;DDIT | Yes                      |
| RICTOR      | 253260  | rapamycin-insensitive companion of mTOR isoform 2                   | NP_001272368.1    | 3          | 2                 | 2          | 4      | 1.2                                                      | 0.96                                                     | 10.51                                                                                  | 1.43                                                                                   | 17.9                                                                                          | 1.9                                                                                           | 2                                                                              | 2                                                                              | 10682   | 253260         | None                                                                                 | Molecular function unknown                   | Nucleus                        | Unclassified                       | Biological process unknown                                                   | -                            | No                       |
| PCNT        | 5116    | pericentrin                                                         | NP_006022.3       | 1          | 2                 | 2          | 3      | 1.2                                                      | 0.94                                                     | 1.33                                                                                   | 20.72                                                                                  | 2.3                                                                                           | 28.1                                                                                          | 2                                                                              | 2                                                                              | 5804    | 5116           | pericentrin 2 (kennin)                                                               | Structural constituent of cytoskeleton       | Centrosome                     | Cytoskeletal protein               | Cell growth and/or maintenance                                               | CC                           | Yes                      |
| SF3B2       | 10992   | splicing factor 3B subunit 2                                        | NP_006833.2       | 1          | 19                | 19         | 39     | 1.2                                                      | 0.93                                                     | 3.88                                                                                   | 7.37                                                                                   | 23                                                                                            | 34.5                                                                                          | 24                                                                             | 24                                                                             | 10410   | 10992          | splicing factor 3b, subunit 2, 145kDa                                                | RNA binding                                  | Nucleus                        | RNA binding protein                | Regulation of nucleobase, nucleoside, nucleotide and nucleic acid metabolism | SAP;CC                       | Yes                      |
| RCL1        | 10171   | RNA 3'-terminal phosphate cyclase-like protein isoform a            | NP_005763.3       | 3          | 6                 | 6          | 9      | 1.2                                                      | 0.92                                                     | 2.4                                                                                    | 7.08                                                                                   | 6.4                                                                                           | 14.6                                                                                          | 5                                                                              | 5                                                                              | 10189   | 10171          | RNA terminal phosphate cyclase-like 1                                                | RNA binding                                  | Nucleus                        | RNA binding protein                | Regulation of nucleobase, nucleoside, nucleotide and nucleic acid metabolism | -                            | Yes                      |
| EIF1AD      | 84285   | probable RNA-binding protein EIF1AD                                 | NP_001229410.1    | 1          | 2                 | 2          | 5      | 1.2                                                      | 0.89                                                     | 15.77                                                                                  | 8.27                                                                                   | 33.5                                                                                          | 12.8                                                                                          | 3                                                                              | 3                                                                              | 14411   | 84285          | None                                                                                 | Molecular function unknown                   | -                              | Unclassified                       | Biological process unknown                                                   | -                            | No                       |
| GTF3C4      | 9329    | general transcription factor 3C polypeptide 4                       | NP_036336.2       | 1          | 8                 | 8          | 13     | 1.2                                                      | 0.89                                                     | 3.87                                                                                   | 4.91                                                                                   | 12.3                                                                                          | 11.6                                                                                          | 7                                                                              | 7                                                                              | 11998   | 9329           | general transcription factor IIC, polypeptide4, 90kDa                                | Transcription factor activity                | Nucleus                        | Transcription factor               | Regulation of nucleobase, nucleoside, nucleotide and nucleic acid metabolism | LZ                           | Yes                      |
| DPH5        | 51611   | diphthine synthase isoform a                                        | NP_057042.2       | 2          | 3                 | 3          | 5      | 1.2                                                      | 0.86                                                     | 5.66                                                                                   | 6.84                                                                                   | 11.8                                                                                          | 10.2                                                                                          | 3                                                                              | 3                                                                              | 13037   | 51611          | None                                                                                 | Molecular function unknown                   | -                              | Unclassified                       | Biological process unknown                                                   | -                            | Yes                      |
| FOXK1       | 221937  | forkhead box protein K1                                             | NP_001032242.1    | 6          | 10                | 10         | 16     | 1.2                                                      | 0.86                                                     | 6.53                                                                                   | 18.23                                                                                  | 21                                                                                            | 43.5                                                                                          | 7                                                                              | 7                                                                              | 18750   | 221937         | Forkhead box K1                                                                      | Transcription factor activity                | Nucleus                        | Transcription factor               | Transcription                                                                | FHA;FHNLS                    | No                       |
| APOD        | 347     | apolipoprotein D precursor                                          | NP_001638.1       | 1          | 1                 | 1          | 1      | 1.2                                                      | 0.85                                                     |                                                                                        |                                                                                        |                                                                                               |                                                                                               | 1                                                                              | 1                                                                              | 134     | 347            | apolipoprotein D                                                                     | Transporter activity                         | Extracellular                  | Transport/cargo protein            | Transport                                                                    | SP                           | Yes                      |

Supplementary Table S1. List of quantified proteins in OKF6/TERT1-Smoke cells  
 Raingonalan *et al.*, 2017. Role of protein kinase N2 (PKN2) in cigarette smoke-mediated oncogenic transformation of oral cells

| Gene Symbol | Gene ID | Protein Description                                                                           | Protein Accession | # Proteins | # Unique Peptides | # Peptides | # PSMs | OKF6/TERT1-Smoke/<br>OKF6/TERT1-Parental<br>(130/126) R1 | OKF6/TERT1-Smoke/<br>OKF6/TERT1-Parental<br>(128/127) R2 | Ratio Standard Errors [%]:<br>OKF6/TERT1-Smoke/<br>OKF6/TERT1-Parental<br>(130/126) R1 | Ratio Standard Errors [%]:<br>OKF6/TERT1-Smoke/<br>OKF6/TERT1-Parental<br>(128/127) R2 | Ratio Variabilities [%]:<br>F13: OKF6/TERT1-<br>Smoke/<br>OKF6/TERT1-Parental<br>(130/126) R1 | Ratio Variabilities [%]:<br>F13: OKF6/TERT1-<br>Smoke/<br>OKF6/TERT1-Parental<br>(128/127) R2 | Ratio Counts: F13:<br>OKF6/TERT1-Smoke/<br>OKF6/TERT1-Parental<br>(130/126) R1 | Ratio Counts: F13:<br>OKF6/TERT1-Smoke/<br>OKF6/TERT1-Parental<br>(128/127) R2 | HPRD ID | Entrez Gene ID | Gene Name                                                                                         | Molecular Function                           | Primary Localization  | Molecular Class                     | Biological Process                                                                   | Domains         | Plasma Proteome Database |
|-------------|---------|-----------------------------------------------------------------------------------------------|-------------------|------------|-------------------|------------|--------|----------------------------------------------------------|----------------------------------------------------------|----------------------------------------------------------------------------------------|----------------------------------------------------------------------------------------|-----------------------------------------------------------------------------------------------|-----------------------------------------------------------------------------------------------|--------------------------------------------------------------------------------|--------------------------------------------------------------------------------|---------|----------------|---------------------------------------------------------------------------------------------------|----------------------------------------------|-----------------------|-------------------------------------|--------------------------------------------------------------------------------------|-----------------|--------------------------|
| DUS3L       | 56931   | lRNA-dihydrouridine(47) synthase [NAD(P)(+)-like isoform 1]                                   | NP_064560.2       | 2          | 2                 | 2          | 5      | 1.2                                                      | 0.84                                                     | 2.71                                                                                   | 10.52                                                                                  | 4.6                                                                                           | 12.6                                                                                          | 2                                                                              | 2                                                                              | 14252   | 56931          | dihydrouridine synthase 3-like (S, cerevisiae)                                                    | DNA binding                                  | Cytoplasm             | DNA binding protein                 | Regulation of nucleobase, nucleoside, nucleotide and nucleic acid metabolism         | ZnF_C3H1        | No                       |
| DDX19A      | 55308   | ATP-dependent RNA helicase DDX19A                                                             | NP_060802.1       | 4          | 2                 | 16         | 38     | 1.2                                                      | 0.77                                                     | 18.17                                                                                  | 40.61                                                                                  | 31.7                                                                                          | 46.8                                                                                          | 2                                                                              | 2                                                                              | 7732    | 55308          | DEAD (Asp-Glu-Ala-As) box polypeptide 19-like                                                     | Molecular function unknown                   | -                     | Unclassified                        | Regulation of nucleobase, nucleoside, nucleotide and nucleic acid metabolism         | DEXDc;HELIC     | No                       |
| CRK         | 1398    | adapter molecule crk isoform a                                                                | NP_058431.2       | 2          | 1                 | 1          | 2      | 1.2                                                      | 0.73                                                     |                                                                                        |                                                                                        |                                                                                               |                                                                                               | 1                                                                              | 1                                                                              | 1267    | 1398           | v-crk sarcoma virus CT10 oncogene homolog (avian)                                                 | Receptor signaling complex scaffold activity | Cytoplasm             | Adapter molecule                    | Cell communication;Signal transduction                                               | SH2;SH3         | Yes                      |
| PYROXD1     | 79912   | pyridine nucleotide-disulfide oxidoreductase domain-containing protein 1                      | NP_079130.2       | 1          | 1                 | 1          | 2      | 1.19                                                     | 1.9                                                      |                                                                                        |                                                                                        |                                                                                               |                                                                                               | 1                                                                              | 1                                                                              | 7976    | 79912          | None                                                                                              | Molecular function unknown                   | -                     | Unclassified                        | Biological process unknown                                                           | -               | Yes                      |
| MLKL        | 197259  | mixed lineage kinase domain-like protein isoform 1                                            | NP_689862.1       | 1          | 3                 | 3          | 5      | 1.19                                                     | 1.6                                                      | 3.21                                                                                   | 0.41                                                                                   | 5.4                                                                                           | 0.9                                                                                           | 2                                                                              | 2                                                                              | 8752    | 197259         | mixed lineage kinase domain-like                                                                  | Protein-tyrosine kinase activity             | -                     | Tyrosine kinase                     | Cell communication;Signal transduction                                               | CC_S_T_Y_Kinase | Yes                      |
| NIP7        | 51388   | 60S ribosome subunit biogenesis protein NIP7 homolog isoform 1                                | NP_057185.1       | 2          | 1                 | 1          | 2      | 1.19                                                     | 1.45                                                     |                                                                                        |                                                                                        |                                                                                               |                                                                                               | 1                                                                              | 1                                                                              | 16709   | 51388          | None                                                                                              | RNA binding                                  | Nucleolus             | RNA binding protein                 | Cell growth and/or maintenance                                                       | -               | Yes                      |
| TFAP2A      | 7020    | transcription factor AP-2-alpha isoform a                                                     | NP_003211.1       | 5          | 4                 | 4          | 7      | 1.19                                                     | 1.42                                                     | 7.51                                                                                   | 7.57                                                                                   | 18                                                                                            | 21.7                                                                                          | 4                                                                              | 4                                                                              | 128     | 7020           | transcription factor AP-2 alpha (activating enhancer binding protein 2 alpha)                     | Transcription factor activity                | Nucleus               | Transcription factor                | Development;Apoptosis;Cell differentiation;Regulation of gene expression, epigenetic | -               | Yes                      |
| PANX1       | 24145   | pannexin-1                                                                                    | NP_056183.2       | 1          | 4                 | 4          | 12     | 1.19                                                     | 1.39                                                     | 24.76                                                                                  | 12.91                                                                                  | 82.8                                                                                          | 46.2                                                                                          | 6                                                                              | 6                                                                              | 10526   | 24145          | pannexin 1                                                                                        | Cell adhesion molecule activity              | Plasma membrane       | Cell junction protein               | Cell growth and/or maintenance                                                       | TM              | Yes                      |
| GMPS        | 8833    | GMP synthase [glutamine-hydrolyzing]                                                          | NP_003866.1       | 1          | 22                | 22         | 55     | 1.19                                                     | 1.38                                                     | 2.62                                                                                   | 4.11                                                                                   | 17.4                                                                                          | 32.4                                                                                          | 31                                                                             | 31                                                                             | 10927   | 8833           | guanine monophosphate synthetase                                                                  | Amidino transferase activity                 | -                     | Enzyme;Amidino transferase          | Metabolism;Energy pathways                                                           | -               | Yes                      |
| SART1       | 9092    | U4/U6/U5 tri-snRNP-associated protein 1                                                       | NP_005137.1       | 1          | 18                | 18         | 48     | 1.19                                                     | 1.37                                                     | 4.41                                                                                   | 3.99                                                                                   | 25.6                                                                                          | 26.8                                                                                          | 23                                                                             | 23                                                                             | 10440   | 9092           | squamous cell carcinoma antigen recognised by Teells                                              | Molecular function unknown                   | Nucleus               | Unclassified                        | Biological process unknown                                                           | CC              | Yes                      |
| ABT1        | 29777   | activator of basal transcription 1                                                            | NP_037507.1       | 1          | 1                 | 1          | 1      | 1.19                                                     | 1.28                                                     |                                                                                        |                                                                                        |                                                                                               |                                                                                               | 1                                                                              | 1                                                                              | 16469   | 29777          | activator of basal transcription 1                                                                | Transcription factor activity                | Nucleus               | Transcription factor                | Regulation of nucleobase, nucleoside, nucleotide and nucleic acid metabolism         | CC              | No                       |
| KPNB1       | 3837    | importin subunit beta-1 isoform 1                                                             | NP_002256.2       | 2          | 23                | 23         | 133    | 1.19                                                     | 1.25                                                     | 2.28                                                                                   | 4.19                                                                                   | 21.8                                                                                          | 43.6                                                                                          | 63                                                                             | 63                                                                             | 4114    | 3837           | karyopherin (importin) beta 1                                                                     | Transporter activity                         | Cytoplasm             | Transport/cargo protein             | Transport                                                                            | ARM;IBN_NT      | Yes                      |
| SEC16A      | 9919    | protein transport protein Sec16A isoform 2                                                    | NP_001263347.1    | 1          | 1                 | 26         | 56     | 1.19                                                     | 1.18                                                     |                                                                                        |                                                                                        |                                                                                               |                                                                                               | 1                                                                              | 1                                                                              | 11075   | 9919           | KIAA0310                                                                                          | Molecular function unknown                   | Endoplasmic reticulum | Unclassified                        | Cell motility;ER organization and biogenesis;Protein transport                       | SP              | Yes                      |
| FAH         | 2184    | fumarylacetoacetase                                                                           | NP_000128.1       | 1          | 11                | 11         | 21     | 1.19                                                     | 1.18                                                     | 9.49                                                                                   | 5.11                                                                                   | 37                                                                                            | 19.2                                                                                          | 10                                                                             | 10                                                                             | 2040    | 2184           | fumarylacetoacetate hydrolase (fumarylacetoacetase)                                               | Hydrolase activity                           | Cytoplasm             | Enzyme;Hydrolase                    | Metabolism;Energy pathways                                                           | -               | Yes                      |
| EMG1        | 10436   | ribosomal RNA small subunit methyltransferase NEP1                                            | NP_006322.4       | 1          | 7                 | 7          | 24     | 1.19                                                     | 1.12                                                     | 2.75                                                                                   | 9.81                                                                                   | 10.9                                                                                          | 37.7                                                                                          | 11                                                                             | 11                                                                             | 12803   | 10436          | None                                                                                              | Translation regulator activity               | Nucleus               | Translation regulatory protein      | Protein metabolism                                                                   | -               | Yes                      |
| HISTH2BB    | 3018    | histone H2B type 1-B                                                                          | NP_066406.1       | 8          | 2                 | 9          | 541    | 1.19                                                     | 1.12                                                     | 2.12                                                                                   | 4.3                                                                                    | 7.1                                                                                           | 13.6                                                                                          | 8                                                                              | 8                                                                              | 7536    | 3018           | histone 1, H2bb                                                                                   | DNA binding                                  | Nucleus               | DNA binding protein                 | Regulation of nucleobase, nucleoside, nucleotide and nucleic acid metabolism         | -               | No                       |
| SMARCD2     | 6603    | SWI/SNF-related matrix associated actin-dependent regulator of chromatin subfamily D member 2 | NP_001091896.1    | 5          | 5                 | 5          | 12     | 1.19                                                     | 1.11                                                     | 6.46                                                                                   | 5.74                                                                                   | 19                                                                                            | 15.7                                                                                          | 6                                                                              | 6                                                                              | 3439    | 6603           | SWI/SNF related, matrix associated, actin dependent regulator of chromatin, subfamily d, member 2 | DNA binding                                  | Nucleus               | DNA binding protein                 | Regulation of nucleobase, nucleoside, nucleotide and nucleic acid metabolism         | -               | Yes                      |
| TMEM70      | 54968   | transmembrane protein 70, mitochondrial isoform a                                             | NP_060336.3       | 1          | 1                 | 1          | 1      | 1.19                                                     | 1.08                                                     |                                                                                        |                                                                                        |                                                                                               |                                                                                               | 1                                                                              | 1                                                                              | 7923    | 54968          | None                                                                                              | Molecular function unknown                   | Mitochondrion         | Unclassified                        | Biological process unknown                                                           | TM              | No                       |
| ARL6IP6     | 151188  | ADP-ribosylation factor-like protein 6 interacting protein 6                                  | NP_689735.1       | 1          | 1                 | 1          | 1      | 1.19                                                     | 1.05                                                     |                                                                                        |                                                                                        |                                                                                               |                                                                                               | 1                                                                              | 1                                                                              | 12485   | 151188         | ADP-ribosylation-like factor 6 interacting protein 6                                              | Molecular function unknown                   | -                     | Unclassified                        | Biological process unknown                                                           | TM              | No                       |
| MRPL9       | 65005   | 39S ribosomal protein L9, mitochondrial isoform 1                                             | NP_113608.1       | 2          | 3                 | 3          | 9      | 1.19                                                     | 1.03                                                     | 2.38                                                                                   | 7.08                                                                                   | 6.3                                                                                           | 16.3                                                                                          | 5                                                                              | 5                                                                              | 14774   | 65005          | mitochondrial ribosomal protein L9                                                                | Structural constituent of ribosome           | Mitochondrion         | Ribosomal subunit                   | Protein metabolism                                                                   | -               | No                       |
| RAP2B       | 5912    | ras-related protein Rap-2b                                                                    | NP_002877.2       | 2          | 7                 | 7          | 24     | 1.19                                                     | 1.02                                                     | 6.75                                                                                   | 5.51                                                                                   | 29.5                                                                                          | 20.4                                                                                          | 13                                                                             | 13                                                                             | 1548    | 5912           | RAP2B, member of RAS oncogene family                                                              | GTPase activity                              | Plasma membrane       | GTPase                              | Cell communication;Signal transduction                                               | RAS             | No                       |
| CACYBP      | 27101   | calyculin-binding protein isoform 1                                                           | NP_055227.1       | 2          | 10                | 10         | 20     | 1.19                                                     | 1.01                                                     | 2.01                                                                                   | 8.69                                                                                   | 8.3                                                                                           | 31                                                                                            | 12                                                                             | 12                                                                             | 7316    | 27101          | calyculin binding protein                                                                         | Molecular function unknown                   | Cytoplasm             | Ubiquitin proteasome system protein | Protein metabolism                                                                   | CC              | Yes                      |
| IRGQ        | 126298  | immunity-related GTPase family Q protein                                                      | NP_001007562.1    | 1          | 10                | 10         | 21     | 1.19                                                     | 1                                                        | 10.87                                                                                  | 12.5                                                                                   | 45.1                                                                                          | 43.2                                                                                          | 11                                                                             | 11                                                                             | 17161   | 126298         | immunity-related GTPase family, Q1                                                                | Molecular function unknown                   | -                     | Unclassified                        | Biological process unknown                                                           | -               | No                       |
| RBM15       | 64783   | putative RNA-binding protein 15 isoform 1                                                     | NP_073605.4       | 2          | 9                 | 10         | 17     | 1.19                                                     | 0.93                                                     | 0.33                                                                                   | 7.58                                                                                   | 1.2                                                                                           | 21.5                                                                                          | 9                                                                              | 9                                                                              | 5832    | 64783          | RNA binding motif protein 15                                                                      | RNA binding                                  | -                     | RNA binding protein                 | Regulation of nucleobase, nucleoside, nucleotide and nucleic acid metabolism         | RRM             | Yes                      |
| PEF1        | 553115  | pefin                                                                                         | NP_036524.1       | 1          | 3                 | 3          | 3      | 1.19                                                     | 0.92                                                     | 3.11                                                                                   | 38.96                                                                                  | 5.2                                                                                           | 54.2                                                                                          | 2                                                                              | 2                                                                              | 10143   | 553115         | penta-EF hand domain containing 1                                                                 | Calcium ion binding                          | Cytoplasm             | Calcium binding protein             | Cell communication;Signal transduction                                               | EF              | No                       |



Supplementary Table S1. List of quantified proteins in OKF6/TERT1-Smoke cells  
 Raingonalan *et al.*, 2017. Role of protein kinase N2 (PKN2) in cigarette smoke-mediated oncogenic transformation of oral cells

| Gene Symbol | Gene ID | Protein Description                                                                  | Protein Accession | # Proteins | # Unique Peptides | # Peptides | # PSMs | OKF6/TERT1-Smoke/<br>OKF6/TERT1-Parental<br>(130/126) R1 | OKF6/TERT1-Smoke/<br>OKF6/TERT1-Parental<br>(128/127) R2 | Ratio Standard Errors [%]:<br>OKF6/TERT1-Smoke/<br>OKF6/TERT1-Parental<br>(130/126) R1 | Ratio Standard Errors [%]:<br>OKF6/TERT1-Smoke/<br>OKF6/TERT1-Parental<br>(128/127) R2 | Ratio Variabilities [%]:<br>F13: OKF6/TERT1-<br>Smoke/<br>OKF6/TERT1-Parental<br>(130/126) R1 | Ratio Variabilities [%]:<br>F13: OKF6/TERT1-<br>Smoke/<br>OKF6/TERT1-Parental<br>(128/127) R2 | Ratio Counts: F13:<br>OKF6/TERT1-Smoke/<br>OKF6/TERT1-Parental<br>(130/126) R1 | Ratio Counts: F13:<br>OKF6/TERT1-Smoke/<br>OKF6/TERT1-Parental<br>(128/127) R2 | HPRD ID | Entrez Gene ID | Gene Name                                                          | Molecular Function                           | Primary Localization | Molecular Class                | Biological Process                                                                                                                  | Domains                | Plasma Proteome Database |
|-------------|---------|--------------------------------------------------------------------------------------|-------------------|------------|-------------------|------------|--------|----------------------------------------------------------|----------------------------------------------------------|----------------------------------------------------------------------------------------|----------------------------------------------------------------------------------------|-----------------------------------------------------------------------------------------------|-----------------------------------------------------------------------------------------------|--------------------------------------------------------------------------------|--------------------------------------------------------------------------------|---------|----------------|--------------------------------------------------------------------|----------------------------------------------|----------------------|--------------------------------|-------------------------------------------------------------------------------------------------------------------------------------|------------------------|--------------------------|
| TWISTNB     | 221830  | DNA-directed RNA polymerase I subunit RPA43                                          | NP_001002926.1    | 1          | 2                 | 2          | 6      | 1.18                                                     | 1.11                                                     | 3.83                                                                                   | 24.57                                                                                  | 7.8                                                                                           | 49.8                                                                                          | 3                                                                              | 3                                                                              | 16311   | 221830         | TWIST neighbor                                                     | Transcription factor activity                | Nucleus              | Transcription factor           | Regulation of nucleobase, nucleoside, nucleotide and nucleic acid metabolism                                                        | -                      | No                       |
| EPCAM       | 4072    | epithelial cell adhesion molecule precursor                                          | NP_002345.2       | 1          | 1                 | 1          | 2      | 1.18                                                     | 1.11                                                     |                                                                                        |                                                                                        |                                                                                               |                                                                                               | 1                                                                              | 1                                                                              | 1709    | 4072           | tumor-associated calcium signal transducer 1                       | Cell adhesion molecule activity              | Plasma membrane      | Adhesion molecule              | Cell communication;Signal transduction                                                                                              | SP;TM;THYRO            | Yes                      |
| LARP4B      | 23185   | la-related protein 4B                                                                | NP_055970.1       | 1          | 6                 | 6          | 12     | 1.18                                                     | 1.1                                                      | 6.49                                                                                   | 8.96                                                                                   | 20.4                                                                                          | 26.5                                                                                          | 7                                                                              | 7                                                                              | 13787   | 23185          | KIAA0217                                                           | RNA binding                                  | Nucleus;Cytoplasm    | RNA binding protein            | Regulation of nucleobase, nucleoside, nucleotide and nucleic acid metabolism                                                        | LA;RRM                 | No                       |
| BCAR1       | 9564    | breast cancer anti-estrogen resistance protein 1 isoform 1                           | NP_001164185.1    | 9          | 11                | 11         | 26     | 1.18                                                     | 1.1                                                      | 3.27                                                                                   | 9.52                                                                                   | 13.9                                                                                          | 39                                                                                            | 13                                                                             | 13                                                                             | 4248    | 9564           | breast cancer anti-estrogen resistance 1                           | Receptor signaling complex scaffold activity | Cytoplasm            | Adapter molecule               | Cell communication;Signal transduction                                                                                              | SH3                    | Yes                      |
| RBM5        | 10181   | RNA-binding protein 5                                                                | NP_005769.1       | 1          | 2                 | 3          | 5      | 1.18                                                     | 1.09                                                     | 18.17                                                                                  | 17.98                                                                                  | 31                                                                                            | 28.2                                                                                          | 2                                                                              | 2                                                                              | 6052    | 10181          | RNA binding motif protein 5                                        | RNA binding                                  | Nucleus              | RNA binding protein            | Regulation of nucleobase, nucleoside, nucleotide and nucleic acid metabolism                                                        | RRM;ZnF_RBZ;G_PATCH;CC | Yes                      |
| ATG4B       | 23192   | cysteine protease ATG4B isoform a                                                    | NP_037457.3       | 2          | 3                 | 3          | 7      | 1.18                                                     | 1.08                                                     | 5.97                                                                                   | 14.83                                                                                  | 14.2                                                                                          | 32.7                                                                                          | 4                                                                              | 4                                                                              | 16499   | 23192          | APG4 autophagy 4 homolog B (S. cerevisiae)                         | Peptidase activity                           | Cytoplasm;Nucleus    | Cysteine protease              | Proteolysis and peptidolysis                                                                                                        | -                      | No                       |
| MTA2        | 9219    | metastasis-associated protein MTA2                                                   | NP_004730.2       | 4          | 16                | 19         | 43     | 1.18                                                     | 1.08                                                     | 3.63                                                                                   | 2.93                                                                                   | 20.3                                                                                          | 14.9                                                                                          | 22                                                                             | 22                                                                             | 7233    | 9219           | metastasis associated 1 family, member 2                           | DNA binding                                  | Nucleus              | Regulatory/other subunit       | Regulation of nucleobase, nucleoside, nucleotide and nucleic acid metabolism;Chromosome organization and biogenesis (sensu Eukarya) | SANT;ZNF_GATA          | Yes                      |
| SYMPK       | 8189    | symplekin                                                                            | NP_004810.2       | 1          | 9                 | 9          | 19     | 1.18                                                     | 1.08                                                     | 6.64                                                                                   | 11.52                                                                                  | 26.4                                                                                          | 43.1                                                                                          | 11                                                                             | 11                                                                             | 9090    | 8189           | symplekin                                                          | Cell adhesion molecule activity              | Plasma membrane      | Cell junction protein          | Cell growth and/or maintenance                                                                                                      | HEAT                   | Yes                      |
| EIF2B2      | 8892    | translation initiation factor eIF-2B subunit beta                                    | NP_055054.1       | 1          | 6                 | 6          | 13     | 1.18                                                     | 1.07                                                     | 7.16                                                                                   | 18.13                                                                                  | 20.9                                                                                          | 50.3                                                                                          | 6                                                                              | 6                                                                              | 5923    | 8892           | eukaryotic translation initiation factor 2B, subunit 2 beta, 39kDa | Translation regulator activity               | Cytoplasm            | Translation regulatory protein | Protein metabolism                                                                                                                  | -                      | Yes                      |
| VAT1        | 10493   | synaptic vesicle membrane protein VAT-1 homolog                                      | NP_006364.2       | 1          | 11                | 11         | 44     | 1.18                                                     | 1.05                                                     | 6.17                                                                                   | 5.72                                                                                   | 36.8                                                                                          | 30.2                                                                                          | 24                                                                             | 24                                                                             | 5220    | 10493          | vesicle amine transport protein 1 homolog (Caenorhabditis)         | Transporter activity                         | Cytoplasmic vesicle  | Transport/cargo protein        | Transport                                                                                                                           | -                      | Yes                      |
| NACA        | 4666    | nucleon polypeptide-associated complex subunit alpha isoform a                       | NP_001106674.2    | 2          | 7                 | 7          | 89     | 1.18                                                     | 1.05                                                     | 3.96                                                                                   | 6.69                                                                                   | 26.4                                                                                          | 40.7                                                                                          | 31                                                                             | 31                                                                             | 3137    | 4666           | nucleon polypeptide-associated complex alpha polypeptide           | Chaperone activity                           | Nucleus              | Chaperone                      | Protein metabolism                                                                                                                  | -                      | Yes                      |
| ANKRD28     | 23243   | serine/threonine-protein phosphatase 6 regulatory ankyrin repeat subunit A isoform a | NP_056014.2       | 2          | 3                 | 3          | 4      | 1.18                                                     | 1.04                                                     | 14.1                                                                                   | 8.6                                                                                    | 23.9                                                                                          | 12.7                                                                                          | 2                                                                              | 2                                                                              | 10651   | 23243          | ankyrin repeat domain 28                                           | Molecular function unknown                   | -                    | Unclassified                   | Biological process unknown                                                                                                          | ANK                    | Yes                      |
| PUS7        | 54517   | pseudouridylate synthase 7 homolog                                                   | NP_061915.2       | 1          | 6                 | 6          | 9      | 1.18                                                     | 1.03                                                     | 1.41                                                                                   | 8.61                                                                                   | 4.1                                                                                           | 22                                                                                            | 6                                                                              | 6                                                                              | 7914    | 54517          | None                                                               | Lyase activity                               | -                    | Enzyme; Lyase                  | Regulation of nucleobase, nucleoside, nucleotide and nucleic acid metabolism                                                        | CC                     | Yes                      |
| PRPF31      | 26121   | U4L6 small nuclear ribonucleoprotein Prp31                                           | NP_056444.3       | 1          | 10                | 10         | 19     | 1.18                                                     | 1.02                                                     | 7.2                                                                                    | 7.58                                                                                   | 29.9                                                                                          | 27.2                                                                                          | 12                                                                             | 12                                                                             | 5917    | 26121          | PRP31 pre-mRNA processing factor 31 homolog (yeast)                | RNA binding                                  | Nucleus              | RNA binding protein            | Regulation of nucleobase, nucleoside, nucleotide and nucleic acid metabolism                                                        | -                      | No                       |
| DYNC1I2     | 1781    | cytoplasmic dynein 1 intermediate chain 2 isoform 1                                  | NP_001369.1       | 4          | 11                | 11         | 31     | 1.18                                                     | 1.01                                                     | 6.98                                                                                   | 7.37                                                                                   | 34.9                                                                                          | 31.6                                                                                          | 17                                                                             | 17                                                                             | 4512    | 1781           | dynein, cytoplasmic, intermediate polypeptide 2                    | Motor activity                               | Cytoplasm            | Motor protein                  | Cell growth and/or maintenance                                                                                                      | CC;WD40                | Yes                      |
| POLDIP3     | 84271   | polymerase delta-interacting protein 3 isoform 3                                     | NP_001265586.1    | 3          | 6                 | 6          | 19     | 1.18                                                     | 1.01                                                     | 5.96                                                                                   | 5.73                                                                                   | 22.5                                                                                          | 18.5                                                                                          | 10                                                                             | 10                                                                             | 17875   | 84271          | polymerase (DNA-directed), delta-interacting protein 3             | RNA binding                                  | Nucleolus            | RNA binding protein            | Cell growth and/or maintenance                                                                                                      | RRM                    | Yes                      |
| YLPM1       | 56252   | YLP motif-containing protein 1                                                       | NP_062535.2       | 1          | 7                 | 7          | 15     | 1.18                                                     | 1.01                                                     | 2.6                                                                                    | 5                                                                                      | 9.2                                                                                           | 15.3                                                                                          | 9                                                                              | 9                                                                              | 11688   | 56252          | YLP motif containing 1                                             | Molecular function unknown                   | Nucleus              | Unclassified                   | Biological process unknown                                                                                                          | CC                     | Yes                      |
| RIF1        | 55183   | telomere-associated protein RIF1 isoform 1                                           | NP_060621.3       | 2          | 5                 | 5          | 8      | 1.18                                                     | 1                                                        | 6.96                                                                                   | 5.38                                                                                   | 16.5                                                                                          | 10.8                                                                                          | 4                                                                              | 4                                                                              | 10603   | 55183          | RAP1 interacting factor homolog (yeast)                            | DNA repair protein                           | Nucleus              | DNA binding protein            | Regulation of nucleobase, nucleoside, nucleotide and nucleic acid metabolism                                                        | -                      | No                       |
| ANKRD27     | 84079   | ankyrin repeat domain-containing protein 27                                          | NP_115515.2       | 1          | 1                 | 1          | 2      | 1.18                                                     | 0.99                                                     |                                                                                        |                                                                                        |                                                                                               |                                                                                               | 1                                                                              | 1                                                                              | 10650   | 84079          | ankyrin repeat domain 27 (VPS9 domain)                             | Molecular function unknown                   | -                    | Unclassified                   | Biological process unknown                                                                                                          | VPS9;ANK               | No                       |
| PAPSS1      | 9061    | bifunctional 3'-phosphoadenosine 5'-phosphosulfate synthase 1                        | NP_005434.4       | 1          | 11                | 11         | 21     | 1.18                                                     | 0.97                                                     | 3.3                                                                                    | 14.04                                                                                  | 13                                                                                            | 47.8                                                                                          | 11                                                                             | 11                                                                             | 9132    | 9061           | 3'-phosphoadenosine 5'-phosphosulfate synthase 1                   | Nucleotidyltransferase activity              | Nucleus              | Enzyme; Synthase               | Metabolism;Energy pathways                                                                                                          | -                      | Yes                      |
| DDX24       | 57062   | ATP-dependent RNA helicase DDX24                                                     | NP_065147.1       | 1          | 9                 | 9          | 13     | 1.18                                                     | 0.96                                                     | 3.24                                                                                   | 9.45                                                                                   | 10.2                                                                                          | 24.2                                                                                          | 7                                                                              | 7                                                                              | 5860    | 57062          | DEAD (Asp-Glu-Ala-Asp) box polypeptide 24                          | Transporter activity                         | Nucleus              | Transport/cargo protein        | Transport                                                                                                                           | HELIC;DEXDc            | Yes                      |
| HNRNPC      | 3183    | heterogeneous nuclear ribonucleoproteins C1/C2 isoform b                             | NP_004491.2       | 2          | 3                 | 17         | 270    | 1.18                                                     | 0.96                                                     | 6.6                                                                                    | 13.28                                                                                  | 29.7                                                                                          | 50.7                                                                                          | 14                                                                             | 14                                                                             | 1243    | 3183           | heterogeneous nuclear ribonucleoprotein C1/C2                      | RNA binding                                  | Nucleus              | RNA binding protein            | Regulation of nucleobase, nucleoside, nucleotide and nucleic acid metabolism                                                        | RRMLZ;CC               | Yes                      |

Supplementary Table S1. List of quantified proteins in OKF6/TERT1-Smoke cells  
 Raingopaln *et al.*, 2017. Role of protein kinase N2 (PKN2) in cigarette smoke-mediated oncogenic transformation of oral cells

| Gene Symbol | Gene ID | Protein Description                                                      | Protein Accession | # Proteins | # Unique Peptides | # Peptides | # PSMs | OKF6/TERT1-Smoke/<br>OKF6/TERT1-Parental<br>(130/126) R1 | OKF6/TERT1-Smoke/<br>OKF6/TERT1-Parental<br>(128/127) R2 | Ratio Standard Errors [%]:<br>OKF6/TERT1-Smoke/<br>OKF6/TERT1-Parental<br>(130/126) R1 | Ratio Standard Errors [%]:<br>OKF6/TERT1-Smoke/<br>OKF6/TERT1-Parental<br>(128/127) R2 | Ratio Variabilities [%]:<br>F13: OKF6/TERT1-<br>Smoke/<br>OKF6/TERT1-Parental<br>(130/126) R1 | Ratio Variabilities [%]:<br>F13: OKF6/TERT1-<br>Smoke/<br>OKF6/TERT1-Parental<br>(128/127) R2 | Ratio Counts: F13:<br>OKF6/TERT1-Smoke/<br>OKF6/TERT1-Parental<br>(130/126) R1 | Ratio Counts: F13:<br>OKF6/TERT1-Smoke/<br>OKF6/TERT1-Parental<br>(128/127) R2 | HPRD ID | Entrez Gene Id | Gene Name                                                                               | Molecular Function                           | Primary Localization  | Molecular Class                    | Biological Process                                                           | Domains                       | Plasma Proteome Database |  |
|-------------|---------|--------------------------------------------------------------------------|-------------------|------------|-------------------|------------|--------|----------------------------------------------------------|----------------------------------------------------------|----------------------------------------------------------------------------------------|----------------------------------------------------------------------------------------|-----------------------------------------------------------------------------------------------|-----------------------------------------------------------------------------------------------|--------------------------------------------------------------------------------|--------------------------------------------------------------------------------|---------|----------------|-----------------------------------------------------------------------------------------|----------------------------------------------|-----------------------|------------------------------------|------------------------------------------------------------------------------|-------------------------------|--------------------------|--|
| TDRD7       | 23424   | tudor domain-containing protein 7 isoform 1                              | NP_055105.2       | 2          | 3                 | 3          | 5      | 1.18                                                     | 0.95                                                     | 3.74                                                                                   | 16.55                                                                                  | 6.2                                                                                           | 22.6                                                                                          | 2                                                                              | 2                                                                              | 11626   | 23424          | tudor domain containing 7                                                               | Receptor signaling complex scaffold activity | Mitochondrion         | Adapter molecule                   | Cell communication;Signal transduction                                       | TUDOR                         | Yes                      |  |
| MFGE8       | 4240    | lactadherin isoform a preproprotein                                      | NP_005919.2       | 2          | 8                 | 8          | 13     | 1.18                                                     | 0.95                                                     | 4.74                                                                                   | 16.6                                                                                   | 14.9                                                                                          | 43.6                                                                                          | 7                                                                              | 7                                                                              | 3789    | 4240           | milk fat globule-EGF factor 8 protein                                                   | Cell adhesion molecule activity              | Plasma membrane       | Adhesion molecule                  | Cell communication;Signal transduction                                       | SP;EGF;F58C                   | Yes                      |  |
| TPD52L2     | 7165    | tumor protein D54 isoform a                                              | NP_955392.1       | 10         | 8                 | 8          | 25     | 1.18                                                     | 0.94                                                     | 4.19                                                                                   | 10.45                                                                                  | 20.6                                                                                          | 42.1                                                                                          | 17                                                                             | 17                                                                             | 11947   | 7165           | tumor protein D52-like 2                                                                | Molecular function unknown                   | Cytoplasm;Nucleus     | Unclassified                       | Cell growth and/or maintenance;Biological process unknown                    | CC                            | Yes                      |  |
| ATM         | 472     | serine-protein kinase ATM                                                | NP_000042.3       | 1          | 4                 | 4          | 6      | 1.18                                                     | 0.93                                                     | 20.21                                                                                  | 19.8                                                                                   | 43.2                                                                                          | 32.5                                                                                          | 3                                                                              | 3                                                                              | 6347    | 472            | ataxia telangiectasia mutated (includes complementation groups A, C and D)              | Protein serine/threonine kinase activity     | Nucleus               | Serine/threonine kinase            | Cell communication;Signal transduction                                       | PEKCC                         | Yes                      |  |
| NUFIP2      | 57532   | nuclear fragile X mental retardation-interacting protein 2               | NP_065823.1       | 1          | 13                | 13         | 27     | 1.18                                                     | 0.91                                                     | 3.65                                                                                   | 7.36                                                                                   | 16.8                                                                                          | 26.3                                                                                          | 15                                                                             | 15                                                                             | 11764   | 57532          | None                                                                                    | RNA binding                                  | Nucleus               | RNA binding protein                | Regulation of nucleobase, nucleoside, nucleotide and nucleic acid metabolism | -                             | No                       |  |
| MRPL1       | 65008   | 39S ribosomal protein L1, mitochondrial precursor                        | NP_064621.3       | 1          | 8                 | 8          | 39     | 1.18                                                     | 0.91                                                     | 3.37                                                                                   | 9.41                                                                                   | 13.2                                                                                          | 30.5                                                                                          | 11                                                                             | 12                                                                             | 14737   | 65008          | mitochondrial ribosomal protein L1                                                      | Structural constituent of ribosome           | Mitochondrion         | RNA binding protein                | Protein metabolism                                                           | -                             | No                       |  |
| DYRK1A      | 1859    | dual specificity tyrosine-phosphorylation-regulated kinase 1A isoform 1  | NP_001387.2       | 4          | 1                 | 1          | 2      | 1.18                                                     | 0.91                                                     |                                                                                        |                                                                                        |                                                                                               |                                                                                               | 1                                                                              | 1                                                                              | 9018    | 1859           | dual-specificity tyrosine (Y)-phosphorylation-regulated kinase 1A                       | Protein serine/threonine kinase activity     | Cytoplasm;Nucleus     | Serine/threonine kinase            | Cell communication;Signal transduction                                       | S,T_kinase;NLS;LZ             | Yes                      |  |
| DDX39B      | 7919    | spliceosome RNA helicase DDX39B                                          | NP_542165.1       | 2          | 9                 | 17         | 75     | 1.18                                                     | 0.88                                                     | 6.76                                                                                   | 15.28                                                                                  | 37.9                                                                                          | 68.4                                                                                          | 21                                                                             | 21                                                                             |         |                |                                                                                         |                                              |                       |                                    |                                                                              |                               |                          |  |
| ERGIC3      | 51614   | endoplasmic reticulum-Golgi intermediate compartment protein 3 isoform a | NP_938408.1       | 2          | 1                 | 1          | 1      | 1.18                                                     | 0.88                                                     |                                                                                        |                                                                                        |                                                                                               |                                                                                               | 1                                                                              | 1                                                                              | 15306   | 51614          | serologically defined breast cancer antigen84                                           | Molecular function unknown                   | Golgi apparatus       | Unclassified                       | Biological process unknown                                                   | TM                            | Yes                      |  |
| THBD        | 7056    | thrombospondin precursor                                                 | NP_000352.1       | 1          | 5                 | 5          | 12     | 1.18                                                     | 0.87                                                     | 23.15                                                                                  | 19.23                                                                                  | 75.5                                                                                          | 42.7                                                                                          | 6                                                                              | 6                                                                              | 1764    | 7056           | thrombospondin                                                                          | Receptor activity                            | Plasma membrane       | Cell surface receptor              | Immune response                                                              | TM;LECTIN;C_EGF;EGFL;EGFC;ASP | No                       |  |
| TBC1D20     | 128637  | TBC1 domain family member 20                                             | NP_653229.1       | 1          | 1                 | 1          | 2      | 1.18                                                     | 0.85                                                     |                                                                                        |                                                                                        |                                                                                               |                                                                                               | 1                                                                              | 1                                                                              | 15472   | 128637         | TBC1 domain family, member 20                                                           | Molecular function unknown                   | -                     | Unclassified                       | Biological process unknown                                                   | TBC;TM                        | Yes                      |  |
| OLFML1      | 283298  | olfactomedin-like protein 1 precursor                                    | NP_940876.2       | 1          | 1                 | 1          | 2      | 1.18                                                     | 0.81                                                     |                                                                                        |                                                                                        |                                                                                               |                                                                                               | 1                                                                              | 1                                                                              | 17661   | 283298         | olfactomedin-like 1                                                                     | Molecular function unknown                   | -                     | Unclassified                       | Biological process unknown                                                   | SP;OLF                        | No                       |  |
| PCM1        | 5108    | pericentriolar material 1 protein                                        | NP_006188.3       | 1          | 6                 | 6          | 9      | 1.18                                                     | 0.8                                                      | 13.68                                                                                  | 15.76                                                                                  | 41                                                                                            | 31.5                                                                                          | 6                                                                              | 6                                                                              | 2624    | 5108           | pericentriolar material 1                                                               | Cytoskeletal protein binding                 | Centrosome            | Cytoskeletal associated protein    | Cell growth and/or maintenance                                               | CC                            | Yes                      |  |
| CRLF3       | 51379   | cytokine receptor-like factor 3                                          | NP_057070.3       | 1          | 2                 | 2          | 2      | 1.18                                                     | 0.76                                                     | 17.71                                                                                  | 28.07                                                                                  | 30.2                                                                                          | 30.7                                                                                          | 2                                                                              | 2                                                                              | 16757   | 51379          | cytokine receptor-like factor 3                                                         | Molecular function unknown                   | -                     | Unclassified                       | Biological process unknown                                                   | CC;FN3                        | Yes                      |  |
| PFND4       | 5203    | prefoldin subunit 4                                                      | NP_002614.2       | 1          | 5                 | 5          | 13     | 1.18                                                     | 0.62                                                     | 16.12                                                                                  | 33.68                                                                                  | 53.7                                                                                          | 60.1                                                                                          | 7                                                                              | 7                                                                              | 5358    | 5203           | prefoldin 4                                                                             | Chaperone activity                           | Cytoplasm             | Chaperone                          | Protein metabolism                                                           | CC                            | Yes                      |  |
| ZMIZ1       | 57178   | zinc finger MIZ domain-containing protein 1                              | NP_065071.1       | 1          | 1                 | 1          | 2      | 1.17                                                     | 1.79                                                     |                                                                                        |                                                                                        |                                                                                               |                                                                                               | 1                                                                              | 1                                                                              | 12115   | 57178          | retinoic acid induced 17                                                                | Molecular function unknown                   | Nucleus               | Unclassified                       | Regulation of nucleobase, nucleoside, nucleotide and nucleic acid metabolism | -                             | Yes                      |  |
| LAMB3       | 3914    | laminin subunit beta-3 precursor                                         | NP_001121113.1    | 1          | 59                | 59         | 267    | 1.17                                                     | 1.59                                                     | 2.69                                                                                   | 3.41                                                                                   | 36.3                                                                                          | 65.4                                                                                          | 124                                                                            | 122                                                                            | 1032    | 3914           | laminin, beta 3                                                                         | Extracellular matrix structural constituent  | Extracellular         | Extracellular matrix protein       | Cell growth and/or maintenance                                               | LAMNT;EGFLA;M;SP;CC           | Yes                      |  |
| ARFGEF2     | 10564   | betaeflin A-inhibited guanine nucleotide-exchange protein 2              | NP_006411.2       | 1          | 4                 | 7          | 13     | 1.17                                                     | 1.51                                                     | 6.42                                                                                   | 5.96                                                                                   | 15.1                                                                                          | 18.2                                                                                          | 4                                                                              | 4                                                                              | 9250    | 10564          | ADP-ribosylation factor guanine nucleotide exchange factor 2 (betaeflin A-inhibited)    | Guanyl-nucleotide exchange factor activity   | Cytoplasm             | Guanine nucleotide exchange factor | Cell communication;Signal transduction                                       | -                             | Yes                      |  |
| SEC24D      | 9871    | protein transport protein Sec24D                                         | NP_055637.2       | 1          | 8                 | 8          | 26     | 1.17                                                     | 1.5                                                      | 6.44                                                                                   | 4.98                                                                                   | 26.6                                                                                          | 26.3                                                                                          | 12                                                                             | 12                                                                             | 6218    | 9871           | SEC24 related gene family, member D (Saccharomyces cerevisiae)                          | Transporter activity                         | Endoplasmic reticulum | Transport/cargo protein            | Transport                                                                    | GEL                           | Yes                      |  |
| ECH1        | 1891    | delta(3,5)-Delta(2,4)-dienoyl-CoA isomerase, mitochondrial precursor     | NP_001389.2       | 1          | 9                 | 9          | 44     | 1.17                                                     | 1.39                                                     | 6.86                                                                                   | 9.54                                                                                   | 38                                                                                            | 66.6                                                                                          | 21                                                                             | 21                                                                             | 2825    | 1891           | enoyl Coenzyme A hydratase 1, peroxisomal                                               | Catalytic activity                           | Peroxisome            | Enzyme;Hydratase                   | Metabolism;Energy pathways                                                   | SP                            | Yes                      |  |
| HNRNPD      | 3184    | heterogeneous nuclear ribonucleoprotein D0 isoform c                     | NP_002129.2       | 4          | 13                | 15         | 67     | 1.17                                                     | 1.38                                                     | 5.14                                                                                   | 6.23                                                                                   | 34.5                                                                                          | 50.7                                                                                          | 31                                                                             | 31                                                                             | 3206    | 3184           | heterogeneous nuclear ribonucleoprotein D(AI-rich element RNA binding protein 1, 37kDa) | MRNA binding                                 | Nucleus;Cytoplasm     | RNA binding protein                | Regulation of nucleobase, nucleoside, nucleotide and nucleic acid metabolism | RRM                           | Yes                      |  |
| STARD10     | 10809   | PCTP-like protein                                                        | NP_006636.2       | 1          | 1                 | 1          | 2      | 1.17                                                     | 1.37                                                     |                                                                                        |                                                                                        |                                                                                               |                                                                                               | 1                                                                              | 1                                                                              | 18116   | 10809          | START domain containing 10                                                              | Molecular function unknown                   | -                     | Unclassified                       | Biological process unknown                                                   | START                         | Yes                      |  |
| CNNM4       | 26504   | metal transporter CNNM4 precursor                                        | NP_064569.3       | 1          | 1                 | 1          | 4      | 1.17                                                     | 1.37                                                     | 8.66                                                                                   | 26.21                                                                                  | 14.5                                                                                          | 54.2                                                                                          | 2                                                                              | 2                                                                              | 7420    | 26504          | cyclin M4                                                                               | Molecular function unknown                   | Nucleus               | Cell cycle control protein         | Cell communication;Signal transduction                                       | CBS;CNMP;TM;SP                | No                       |  |
| FOXRED1     | 55572   | FAD-dependent oxidoreductase domain-containing protein 1                 | NP_060017.1       | 1          | 4                 | 4          | 11     | 1.17                                                     | 1.37                                                     | 4.95                                                                                   | 5.27                                                                                   | 14.2                                                                                          | 17.8                                                                                          | 6                                                                              | 6                                                                              | 13620   | 55572          | None                                                                                    | Molecular function unknown                   | Mitochondrion         | Unclassified                       | Biological process unknown                                                   | -                             | No                       |  |
| SAAL1       | 113174  | protein SAAL1                                                            | NP_612430.2       | 1          | 3                 | 3          | 10     | 1.17                                                     | 1.37                                                     | 6.06                                                                                   | 6.32                                                                                   | 16                                                                                            | 19.6                                                                                          | 5                                                                              | 5                                                                              | 13999   | 113174         | None                                                                                    | Molecular function unknown                   | -                     | Unclassified                       | Biological process unknown                                                   | -                             | No                       |  |
| PRPF19      | 27339   | pre-mRNA-processing factor 19                                            | NP_055317.1       | 1          | 13                | 13         | 62     | 1.17                                                     | 1.36                                                     | 5.71                                                                                   | 4.98                                                                                   | 35                                                                                            | 34.8                                                                                          | 26                                                                             | 25                                                                             | 12214   | 27339          | PRP19/PSO4 pre-mRNA processing factor 19homolog (S. cerevisiae)                         | DNA repair protein                           | Nucleus               | DNA binding protein                | Regulation of nucleobase, nucleoside, nucleotide and nucleic acid metabolism | UBOX;WD40                     | Yes                      |  |

Supplementary Table S1. List of quantified proteins in OKF6/TERT1-Smoke cells  
 Raigopalnan *et al.*, 2017. Role of protein kinase N2 (PKN2) in cigarette smoke-mediated oncogenic transformation of oral cells

| Gene Symbol    | Gene ID | Protein Description                                        | Protein Accession | # Proteins | # Unique Peptides | # Peptides | # PSMs | OKF6/TERT1-Smoke/<br>OKF6/TERT1-Parental<br>(130/126) R1 | OKF6/TERT1-Smoke/<br>OKF6/TERT1-Parental<br>(128/127) R2 | Ratio Standard Errors [%]:<br>OKF6/TERT1-Smoke/<br>OKF6/TERT1-Parental<br>(130/126) R1 | Ratio Standard Errors [%]:<br>OKF6/TERT1-Smoke/<br>OKF6/TERT1-Parental<br>(128/127) R2 | Ratio Variabilities [%]:<br>F13: OKF6/TERT1-<br>Smoke/<br>OKF6/TERT1-Parental<br>(130/126) R1 | Ratio Variabilities [%]:<br>F13: OKF6/TERT1-<br>Smoke/<br>OKF6/TERT1-Parental<br>(128/127) R2 | Ratio Counts: F13:<br>OKF6/TERT1-Smoke/<br>OKF6/TERT1-Parental<br>(130/126) R1 | Ratio Counts: F13:<br>OKF6/TERT1-Smoke/<br>OKF6/TERT1-Parental<br>(128/127) R2 | HPRD ID | Entrez Gene ID | Gene Name                                                                       | Molecular Function                           | Primary Localization    | Molecular Class                     | Biological Process                                                           | Domains           | Plasma Proteome Database |  |
|----------------|---------|------------------------------------------------------------|-------------------|------------|-------------------|------------|--------|----------------------------------------------------------|----------------------------------------------------------|----------------------------------------------------------------------------------------|----------------------------------------------------------------------------------------|-----------------------------------------------------------------------------------------------|-----------------------------------------------------------------------------------------------|--------------------------------------------------------------------------------|--------------------------------------------------------------------------------|---------|----------------|---------------------------------------------------------------------------------|----------------------------------------------|-------------------------|-------------------------------------|------------------------------------------------------------------------------|-------------------|--------------------------|--|
| IREB2          | 3658    | iron-responsive element-binding protein 2                  | NP_004127.1       | 1          | 1                 | 1          | 2      | 1.17                                                     | 1.31                                                     |                                                                                        |                                                                                        |                                                                                               |                                                                                               | 1                                                                              | 1                                                                              | 8858    | 3658           | iron-responsive element binding protein 2                                       | RNA binding                                  | Cytoplasm               | RNA binding protein                 | Regulation of nucleobase, nucleoside, nucleotide and nucleic acid metabolism | -                 | Yes                      |  |
| PTPN1          | 5770    | tyrosine-protein phosphatase non-receptor type 1 isoform 1 | NP_002818.1       | 2          | 22                | 22         | 78     | 1.17                                                     | 1.3                                                      | 5.05                                                                                   | 5.97                                                                                   | 39.7                                                                                          | 53.7                                                                                          | 42                                                                             | 42                                                                             | 1477    | 5770           | protein tyrosine phosphatase, non-receptor type1                                | Protein tyrosine phosphatase activity        | Endoplasmic reticulum   | Tyrosine phosphatase                | Cell communication,Signal transduction                                       | Tyr_Phosph        | Yes                      |  |
| CASP1          | 834     | caspase-1 isoform alpha precursor                          | NP_150634.1       | 7          | 8                 | 8          | 16     | 1.17                                                     | 1.3                                                      | 3.62                                                                                   | 4.97                                                                                   | 12                                                                                            | 18.4                                                                                          | 8                                                                              | 8                                                                              | 977     | 834            | caspase 1, apoptosis-related cysteine protease(interleukin 1, beta, convertase) | Cysteine-type peptidase activity             | Cytoplasm               | Cysteine protease                   | Apoptosis                                                                    | CARD,CASC         | Yes                      |  |
| GMPPB          | 29925   | mannose-1-phosphate guanyltransferase beta isoform 1       | NP_037466.2       | 2          | 9                 | 9          | 18     | 1.17                                                     | 1.3                                                      | 12.08                                                                                  | 6.78                                                                                   | 51.8                                                                                          | 31.3                                                                                          | 12                                                                             | 12                                                                             | 13589   | 29925          | GDP-mannose pyrophosphorylase B                                                 | Phosphorylase activity                       | -                       | Enzyme: Phosphorylase               | Metabolism                                                                   | -                 | No                       |  |
| HSF1           | 3297    | heat shock factor protein 1                                | NP_005517.1       | 1          | 1                 | 1          | 2      | 1.17                                                     | 1.3                                                      |                                                                                        |                                                                                        |                                                                                               |                                                                                               | 1                                                                              | 1                                                                              | 778     | 3297           | heat shock transcription factor 1                                               | Transcription factor activity                | Cytoplasm               | Transcription factor                | Regulation of nucleobase, nucleoside, nucleotide and nucleic acid metabolism | HSFLZ             | Yes                      |  |
| GOLGA4         | 2803    | Golgin subfamily A member 4 isoform 1                      | NP_001166184.1    | 2          | 19                | 19         | 37     | 1.17                                                     | 1.27                                                     | 2.38                                                                                   | 3.23                                                                                   | 12.5                                                                                          | 18.5                                                                                          | 20                                                                             | 20                                                                             | 3941    | 2803           | golgi autoantigen, golgin subfamily a, 4                                        | Transporter activity                         | Golgi apparatus:Nucleus | Transport/cargo protein             | Transport                                                                    | CC                | Yes                      |  |
| SRPK1          | 6732    | SRSF protein kinase 1                                      | NP_003128.3       | 4          | 4                 | 6          | 19     | 1.17                                                     | 1.27                                                     | 7.52                                                                                   | 4.55                                                                                   | 21.8                                                                                          | 14.2                                                                                          | 6                                                                              | 6                                                                              | 15992   | 6732           | SFRS protein kinase 1                                                           | Protein threonine/tyrosine kinase activity   | Nucleus                 | Dual specificity kinase             | Regulation of nucleobase, nucleoside, nucleotide and nucleic acid metabolism | S_T_Y_Kinase      | No                       |  |
| NFKB2          | 4791    | nuclear factor NF-kappa-B p100 subunit isoform a           | NP_001070962.1    | 2          | 10                | 11         | 21     | 1.17                                                     | 1.26                                                     | 2.54                                                                                   | 5.85                                                                                   | 9.9                                                                                           | 24.9                                                                                          | 11                                                                             | 11                                                                             | 1239    | 4791           | nuclear factor of kappa light polypeptide geneenhancer in B cells 2 (p49/p100)  | Transcription factor activity                | Cytoplasm               | Transcription factor                | Regulation of nucleobase, nucleoside, nucleotide and nucleic acid metabolism | IFT-ANK,DEATH_HCC | Yes                      |  |
| CCS            | 9973    | copper chaperone for superoxide dismutase                  | NP_005116.1       | 1          | 1                 | 1          | 2      | 1.17                                                     | 1.22                                                     |                                                                                        |                                                                                        |                                                                                               |                                                                                               | 1                                                                              | 1                                                                              | 4841    | 9973           | copper chaperone for superoxide dismutase                                       | Chaperone activity                           | Cytoplasm               | Chaperone                           | Protein metabolism                                                           | -                 | Yes                      |  |
| NELFCD         | 51497   | negative elongation factor C/D                             | NP_945327.2       | 1          | 4                 | 4          | 16     | 1.17                                                     | 1.21                                                     | 1.76                                                                                   | 6.27                                                                                   | 5.8                                                                                           | 21.8                                                                                          | 8                                                                              | 8                                                                              |         |                |                                                                                 |                                              |                         |                                     |                                                                              |                   |                          |  |
| TMEM189-UBE2V1 | 387522  | TMEM189-UBE2V1 fusion protein                              | NP_954673.1       | 9          | 4                 | 8          | 31     | 1.17                                                     | 1.18                                                     | 16.53                                                                                  | 12.96                                                                                  | 50.3                                                                                          | 38.9                                                                                          | 6                                                                              | 6                                                                              | 11926   | 387522         | None                                                                            | Ubiquitin-specific protease activity         | Nucleus                 | Ubiquitin proteasome system protein | Protein metabolism                                                           | TM,UBC            | Yes                      |  |
| PELO           | 53918   | protein pelota homolog                                     | NP_057030.3       | 1          | 9                 | 9          | 15     | 1.17                                                     | 1.18                                                     | 2.25                                                                                   | 6.11                                                                                   | 7                                                                                             | 20.6                                                                                          | 7                                                                              | 8                                                                              | 9309    | 53918          | pelota homolog (Drosophila)                                                     | Molecular function unknown                   | Nucleus                 | Cell cycle control protein          | Cell communication,Signal transduction                                       | NLS               | Yes                      |  |
| DDX18          | 8886    | ATP-dependent RNA helicase DDX18                           | NP_006764.3       | 1          | 18                | 18         | 50     | 1.17                                                     | 1.14                                                     | 4.31                                                                                   | 6.05                                                                                   | 27.6                                                                                          | 38.3                                                                                          | 29                                                                             | 29                                                                             | 5894    | 8886           | DEAD (Asp-Glu-Ala-Asp) box polypeptide 18                                       | Transporter activity                         | Nucleus                 | Transport/cargo protein             | Transport                                                                    | HELIC,DEXDc       | Yes                      |  |
| CSTF1          | 1477    | cleavage stimulation factor subunit 1                      | NP_001028693.1    | 1          | 5                 | 5          | 8      | 1.17                                                     | 1.13                                                     | 5.02                                                                                   | 6.77                                                                                   | 10.2                                                                                          | 13.4                                                                                          | 3                                                                              | 3                                                                              | 2653    | 1477           | cleavage stimulation factor, 3' pre-RNA subunit 1, 50kDa                        | RNA binding                                  | Nucleus                 | RNA binding protein                 | Regulation of nucleobase, nucleoside, nucleotide and nucleic acid metabolism | WD40              | Yes                      |  |
| ABCB10         | 23456   | ATP-binding cassette sub-family B member 10, mitochondrial | NP_036221.2       | 1          | 2                 | 2          | 3      | 1.17                                                     | 1.12                                                     | 11.53                                                                                  | 6                                                                                      | 19.3                                                                                          | 9.5                                                                                           | 2                                                                              | 2                                                                              | 9263    | 23456          | ATP-binding cassette, sub-family B (MDR/TAP), member 10                         | Auxiliary transport protein activity         | Mitochondrion           | Membrane transport protein          | Transport                                                                    | AAA,TM            | Yes                      |  |
| TERF2          | 7014    | telomeric repeat-binding factor 2                          | NP_005643.2       | 1          | 2                 | 2          | 3      | 1.17                                                     | 1.11                                                     | 2.97                                                                                   | 27.29                                                                                  | 4.9                                                                                           | 44.7                                                                                          | 2                                                                              | 2                                                                              | 3610    | 7014           | telomeric repeat binding factor 2                                               | DNA binding                                  | Nucleus                 | DNA binding protein                 | Regulation of nucleobase, nucleoside, nucleotide and nucleic acid metabolism | SANT              | Yes                      |  |
| STI3           | 6767    | hsc70-interacting protein isoform 1                        | NP_003923.2       | 2          | 14                | 14         | 48     | 1.17                                                     | 1.11                                                     | 2.51                                                                                   | 4.49                                                                                   | 14.7                                                                                          | 25.4                                                                                          | 25                                                                             | 25                                                                             | 8426    | 6767           | suppression of tumorigenicity 15 (coloncanceroma) (Hsp70 interacting protein)   | Receptor signaling complex scaffold activity | Lysosome                | Adapter molecule                    | Cell communication,Signal transduction                                       | TPR,CC,STII       | Yes                      |  |
| EDC3           | 80153   | enhancer of mRNA-decapping protein 3                       | NP_079359.2       | 1          | 3                 | 3          | 6      | 1.17                                                     | 1.1                                                      | 2.41                                                                                   | 9.37                                                                                   | 4.9                                                                                           | 17.9                                                                                          | 3                                                                              | 3                                                                              | 7954    | 80153          | None                                                                            | RNA binding                                  | Cytoplasm               | RNA binding protein                 | Nucleobase, nucleoside, nucleotide and nucleic acid transport                | -                 | Yes                      |  |
| DNM1L          | 10059   | dynammin-1-like protein isoform 3                          | NP_005681.2       | 2          | 1                 | 27         | 110    | 1.17                                                     | 1.08                                                     | 6.55                                                                                   | 5.14                                                                                   | 10.9                                                                                          | 7.9                                                                                           | 2                                                                              | 2                                                                              | 4833    | 10059          | dynammin 1-like                                                                 | GTPase activity                              | Cytoplasm               | GTPase                              | Mitochondrion organization and biogenesis                                    | DYNC,GED          | Yes                      |  |
| FCHO2          | 115548  | F-BAR domain only protein 2 isoform a                      | NP_620137.2       | 2          | 2                 | 2          | 3      | 1.17                                                     | 1.08                                                     | 25.52                                                                                  | 56.23                                                                                  | 44.1                                                                                          | 104.1                                                                                         | 2                                                                              | 2                                                                              | 13319   | 115548         | FCH domain only 2                                                               | Molecular function unknown                   | Nucleus,Cytoplasm       | Unclassified                        | Biological_process unknown                                                   | FCH               | No                       |  |
| RPL21          | 6144    | 60S ribosomal protein L21                                  | NP_000973.2       | 1          | 10                | 10         | 64     | 1.17                                                     | 1.07                                                     | 3.1                                                                                    | 11.9                                                                                   | 21.1                                                                                          | 84                                                                                            | 33                                                                             | 33                                                                             | 4700    | 6144           | ribosomal protein L21                                                           | Structural constituent of ribosome           | Ribosome                | Ribosomal subunit                   | Protein metabolism                                                           | -                 | No                       |  |
| POLD1          | 5424    | DNA polymerase delta catalytic subunit 2                   | NP_001295561.1    | 2          | 6                 | 7          | 11     | 1.17                                                     | 1.06                                                     | 2.44                                                                                   | 7.3                                                                                    | 6.4                                                                                           | 17.5                                                                                          | 5                                                                              | 5                                                                              | 8882    | 5424           | polymerase (DNA directed), delta 1, catalytic subunit 125kDa                    | DNA-directed DNA polymerase activity         | Nucleus                 | DNA polymerase                      | Regulation of nucleobase, nucleoside, nucleotide and nucleic acid metabolism | CC,NLS            | Yes                      |  |
| EPS15          | 2060    | epidermal growth factor receptor substrate 15 isoform A    | NP_001972.1       | 2          | 11                | 11         | 20     | 1.17                                                     | 1.06                                                     | 4.51                                                                                   | 8.98                                                                                   | 18.5                                                                                          | 33.9                                                                                          | 12                                                                             | 12                                                                             | 8968    | 2060           | epidermal growth factor receptor pathway substrate 15                           | Calcium ion binding                          | Plasma membrane         | Calcium binding protein             | Cell communication,Signal transduction                                       | EH,CC,UM          | Yes                      |  |
| DHODH          | 1723    | dihydroorotate dehydrogenase (quinone), mitochondrial      | NP_001352.2       | 1          | 1                 | 1          | 1      | 1.17                                                     | 1.06                                                     |                                                                                        |                                                                                        |                                                                                               |                                                                                               | 1                                                                              | 1                                                                              | 521     | 1723           | dihydroorotate dehydrogenase                                                    | Molecular function unknown                   | Mitochondrion           | Integral membrane protein           | Biological_process unknown                                                   | TM                | Yes                      |  |

Supplementary Table S1. List of quantified proteins in OKF6/TERT1-Smoke cells  
 Raingopaln *et al.*, 2017. Role of protein kinase N2 (PKN2) in cigarette smoke-mediated oncogenic transformation of oral cells

| Gene Symbol | Gene ID | Protein Description                                                              | Protein Accession | # Proteins | # Unique Peptides | # Peptides | # PSMs | OKF6/TERT1-Smoke/<br>OKF6/TERT1-Parental<br>(130/126) R1 | OKF6/TERT1-Smoke/<br>OKF6/TERT1-Parental<br>(128/127) R2 | Ratio Standard Errors [%]:<br>OKF6/TERT1-Smoke/<br>OKF6/TERT1-Parental<br>(130/126) R1 | Ratio Standard Errors [%]:<br>OKF6/TERT1-Smoke/<br>OKF6/TERT1-Parental<br>(128/127) R2 | Ratio Variabilities [%]:<br>F13: OKF6/TERT1-<br>Smoke/<br>OKF6/TERT1-Parental<br>(130/126) R1 | Ratio Variabilities [%]:<br>F13: OKF6/TERT1-<br>Smoke/<br>OKF6/TERT1-Parental<br>(128/127) R2 | Ratio Counts: F13:<br>OKF6/TERT1-Smoke/<br>OKF6/TERT1-Parental<br>(130/126) R1 | Ratio Counts: F13:<br>OKF6/TERT1-Smoke/<br>OKF6/TERT1-Parental<br>(128/127) R2 | HPRD ID | Entrez Gene Id | Gene Name                                                                     | Molecular Function                           | Primary Localization  | Molecular Class                  | Biological Process                                               | Domains            | Plasma Proteome Database |
|-------------|---------|----------------------------------------------------------------------------------|-------------------|------------|-------------------|------------|--------|----------------------------------------------------------|----------------------------------------------------------|----------------------------------------------------------------------------------------|----------------------------------------------------------------------------------------|-----------------------------------------------------------------------------------------------|-----------------------------------------------------------------------------------------------|--------------------------------------------------------------------------------|--------------------------------------------------------------------------------|---------|----------------|-------------------------------------------------------------------------------|----------------------------------------------|-----------------------|----------------------------------|------------------------------------------------------------------|--------------------|--------------------------|
| INTS7       | 25896   | integrator complex subunit 7 isoform 1                                           | NP_056249.1       | 4          | 2                 | 2          | 11     | 1.17                                                     | 1.06                                                     | 8.01                                                                                   | 15.85                                                                                  | 21.1                                                                                          | 39                                                                                            | 5                                                                              | 5                                                                              | 8522    | 25896          | chromosome 1 open reading frame 73                                            | Structural molecule activity                 | -                     | Structural protein               | Biological_process unknown                                       | -                  | No                       |
| SUPT5H      | 6829    | transcription elongation factor SPT5 isoform a                                   | NP_001104490.1    | 2          | 14                | 14         | 27     | 1.17                                                     | 1.05                                                     | 5.09                                                                                   | 8.27                                                                                   | 22.6                                                                                          | 33.5                                                                                          | 14                                                                             | 14                                                                             | 3655    | 6829           | suppressor of Ty 5 homolog (S. cerevisiae)                                    | Transcription factor activity                | Nucleus               | Transcription factor             | Regulation of nucleobase, nucleotide and nucleic acid metabolism | CC;NLS;KOW         | No                       |
| EMC2        | 9694    | ER membrane protein complex subunit 2                                            | NP_055488.1       | 1          | 6                 | 6          | 17     | 1.17                                                     | 1.03                                                     | 8.76                                                                                   | 12.4                                                                                   | 33.2                                                                                          | 41.9                                                                                          | 10                                                                             | 10                                                                             |         |                |                                                                               |                                              |                       |                                  |                                                                  |                    |                          |
| GPN1        | 11321   | GPN-loop GTPase 1 isoform a                                                      | NP_009197.2       | 4          | 2                 | 2          | 4      | 1.17                                                     | 1                                                        | 11.14                                                                                  | 9.7                                                                                    | 18.7                                                                                          | 13.8                                                                                          | 2                                                                              | 2                                                                              | 10308   | 11321          | XPA binding protein 1                                                         | GTPase activity                              | Cytoplasm             | GTPase                           | Cell communication;Signal transduction                           | AAA;CC;SP          | Yes                      |
| FAM129B     | 64855   | niban-like protein 1 isoform 1                                                   | NP_073744.2       | 3          | 29                | 29         | 101    | 1.17                                                     | 0.99                                                     | 3.97                                                                                   | 4.58                                                                                   | 35.1                                                                                          | 34.8                                                                                          | 54                                                                             | 55                                                                             | 10804   | 64855          | chromosome 9 open reading frame 88                                            | Molecular function unknown                   | Nucleus               | Unclassified                     | Biological_process unknown                                       | PH                 | Yes                      |
| SRSF3       | 6428    | serine/arginine-rich splicing factor 3                                           | NP_003008.1       | 1          | 6                 | 7          | 22     | 1.17                                                     | 0.99                                                     | 3.34                                                                                   | 5.14                                                                                   | 14.7                                                                                          | 19.3                                                                                          | 14                                                                             | 14                                                                             |         |                |                                                                               |                                              |                       |                                  |                                                                  |                    |                          |
| MTX2        | 10651   | metaxin-2                                                                        | NP_006545.1       | 1          | 2                 | 2          | 5      | 1.17                                                     | 0.98                                                     | 11.58                                                                                  | 11.88                                                                                  | 23.7                                                                                          | 20.4                                                                                          | 3                                                                              | 3                                                                              | 9777    | 10651          | metaxin 2                                                                     | Molecular function unknown                   | Mitochondrion         | Unclassified                     | Transport                                                        | SP                 | Yes                      |
| SRPRB       | 58477   | signal recognition particle receptor subunit beta                                | NP_067026.3       | 1          | 11                | 11         | 31     | 1.17                                                     | 0.96                                                     | 6.86                                                                                   | 8.57                                                                                   | 35.1                                                                                          | 36.1                                                                                          | 18                                                                             | 18                                                                             | 18105   | 58477          | signal recognition particle receptor, B subunit                               | GTPase activity                              | Endoplasmic reticulum | GTPase                           | Protein metabolism                                               | Small_GTPase       | Yes                      |
| POLR2C      | 5432    | DNA-directed RNA polymerase II subunit RPB3                                      | NP_116558.1       | 1          | 3                 | 3          | 6      | 1.17                                                     | 0.95                                                     | 6.06                                                                                   | 21.2                                                                                   | 14.3                                                                                          | 42                                                                                            | 4                                                                              | 4                                                                              | 15945   | 5432           | polymerase (RNA) II (DNA directed) polypeptideC, 33kDa                        | Transcription regulator activity             | Nucleus               | Transcription regulatory protein | Regulation of nucleobase, nucleotide and nucleic acid metabolism | RPOLD              | Yes                      |
| AASDHPPT    | 60496   | L-aminoadipate-semialdehyde dehydrogenase-phosphopantetheinyl transferase        | NP_056238.2       | 1          | 4                 | 4          | 4      | 1.17                                                     | 0.94                                                     | 7.62                                                                                   | 5.3                                                                                    | 12.7                                                                                          | 7.1                                                                                           | 2                                                                              | 2                                                                              | 9675    | 60496          | aminoadipate-semialdehyde dehydrogenase-phosphopantetheinyl transferase       | Catalytic activity                           | Cytoplasm             | Enzyme: Dehydrogenase            | Metabolism;Energy pathways                                       | -                  | No                       |
| TACC1       | 6867    | transforming acidic coiled-coil-containing protein 1 isoform 1                   | NP_006274.2       | 3          | 3                 | 3          | 5      | 1.17                                                     | 0.94                                                     | 1.51                                                                                   | 0.08                                                                                   | 3.1                                                                                           | 0.1                                                                                           | 3                                                                              | 3                                                                              | 10391   | 6867           | transforming acidic coiled-coil containing protein 1                          | Molecular function unknown                   | Centrosome            | Cell cycle control protein       | Cell communication;Signal transduction                           | CC;NLS;FH2         | Yes                      |
| PIK3R1      | 5295    | phosphatidylinositol 3-kinase regulatory subunit alpha isoform 1                 | NP_852664.1       | 4          | 2                 | 2          | 2      | 1.17                                                     | 0.92                                                     |                                                                                        |                                                                                        |                                                                                               |                                                                                               | 1                                                                              | 1                                                                              | 1381    | 5295           | phosphoinositide-3-kinase, regulatory subunit 1 (p85 alpha)                   | Receptor signaling complex scaffold activity | Plasma membrane       | Adapter molecule                 | Cell communication;Signal transduction                           | SH3;RHOGAP;S H2;CC | Yes                      |
| RPL8        | 6132    | 60S ribosomal protein L8                                                         | NP_150644.1       | 1          | 13                | 13         | 45     | 1.17                                                     | 0.91                                                     | 1.97                                                                                   | 7.25                                                                                   | 12.2                                                                                          | 36.1                                                                                          | 28                                                                             | 28                                                                             | 16044   | 6132           | ribosomal protein L8                                                          | Structural constituent of ribosome           | Nucleolus             | Ribosomal subunit                | Protein metabolism                                               | -                  | Yes                      |
| MCCC1       | 56922   | methylcrotonoyl-CoA carboxylase subunit alpha, mitochondrial isoform 1 precursor | NP_064551.3       | 2          | 3                 | 3          | 7      | 1.17                                                     | 0.88                                                     | 2.17                                                                                   | 3.73                                                                                   | 5.1                                                                                           | 6.6                                                                                           | 4                                                                              | 4                                                                              | 1951    | 56922          | methylcrotonoyl-Coenzyme A carboxylase (alpha)                                | Ligase activity                              | Mitochondrion         | Enzyme: Carboxylase              | Metabolism;Energy pathways                                       | SP                 | Yes                      |
| KIF1B       | 23095   | kinesin-like protein KIF1B isoform alpha                                         | NP_904325.2       | 4          | 2                 | 4          | 9      | 1.17                                                     | 0.86                                                     | 8.45                                                                                   | 19.94                                                                                  | 14.1                                                                                          | 24.7                                                                                          | 2                                                                              | 2                                                                              | 5818    | 23095          | kinesin family member 1B                                                      | Motor activity                               | Cytoplasmic vesicle   | Motor protein                    | Cell growth and/or maintenance                                   | KIS;FHA;PH;C C     | Yes                      |
| LZTFL1      | 54585   | leucine zipper transcription factor-like protein 1 isoform 1                     | NP_065080.1       | 3          | 1                 | 1          | 1      | 1.17                                                     | 0.86                                                     |                                                                                        |                                                                                        |                                                                                               |                                                                                               | 1                                                                              | 1                                                                              | 7586    | 54585          | leucine zipper transcription factor-like 1                                    | Molecular function unknown                   | -                     | Unclassified                     | Biological_process unknown                                       | LZ                 | Yes                      |
| YAP1        | 10413   | yorkie homolog isoform 9                                                         | NP_001269030.1    | 9          | 6                 | 6          | 13     | 1.17                                                     | 0.84                                                     | 9.68                                                                                   | 13.24                                                                                  | 28.4                                                                                          | 27.7                                                                                          | 6                                                                              | 6                                                                              | 9424    | 10413          | Yes-associated protein 1, 65kDa                                               | Transcription regulator activity             | Nucleus               | Transcription regulatory protein | Regulation of nucleobase, nucleotide and nucleic acid metabolism | WW;CC              | Yes                      |
| RUNX1       | 861     | runx-related transcription factor 1 isoform AML1c                                | NP_001745.2       | 3          | 3                 | 3          | 4      | 1.17                                                     | 0.84                                                     | 38.96                                                                                  | 18.11                                                                                  | 93                                                                                            | 26.9                                                                                          | 3                                                                              | 3                                                                              | 1043    | 861            | runx-related transcription factor 1 (acute myeloid leukemia 1; aml1 oncogene) | Transcription factor activity                | Nucleus               | Transcription factor             | Regulation of nucleobase, nucleotide and nucleic acid metabolism | Runx               | Yes                      |
| CHMP3       | 51652   | charged multivesicular body protein 3 isoform 1                                  | NP_057163.1       | 4          | 3                 | 3          | 4      | 1.17                                                     | 0.83                                                     | 15.7                                                                                   | 26.3                                                                                   | 32.7                                                                                          | 39                                                                                            | 3                                                                              | 3                                                                              |         |                |                                                                               |                                              |                       |                                  |                                                                  |                    |                          |
| RAB3D       | 9545    | ras-related protein Rab-3D                                                       | NP_004274.1       | 11         | 3                 | 8          | 56     | 1.17                                                     | 0.81                                                     | 2.8                                                                                    | 26.33                                                                                  | 5.7                                                                                           | 38                                                                                            | 3                                                                              | 3                                                                              | 5070    | 9545           | RAB3D, member RAS oncogene family                                             | GTPase activity                              | Secretory granule     | GTPase                           | Transport                                                        | RAB                | Yes                      |
| RPS15       | 6209    | 40S ribosomal protein S15 isoform 1                                              | NP_001295155.1    | 2          | 3                 | 3          | 68     | 1.17                                                     | 0.81                                                     | 10.37                                                                                  | 14.75                                                                                  | 67                                                                                            | 65.3                                                                                          | 25                                                                             | 25                                                                             | 1613    | 6209           | ribosomal protein S15                                                         | Structural constituent of ribosome           | Ribosome              | Ribosomal subunit                | Regulation of nucleobase, nucleotide and nucleic acid metabolism | -                  | No                       |
| ERC1        | 23085   | ELKS/Rab6-interacting/CAST family member 1 isoform epsilon                       | NP_829884.1       | 3          | 8                 | 9          | 24     | 1.17                                                     | 0.79                                                     | 5.4                                                                                    | 13.29                                                                                  | 20.2                                                                                          | 34.4                                                                                          | 10                                                                             | 10                                                                             | 6181    | 23085          | RAB6 interacting protein 2                                                    | Protein binding                              | Cytoplasm             | Regulatory/other subunit         | Energy pathways                                                  | CC                 | Yes                      |
| HYPK        | 25764   | huntingtin-interacting protein K isoform 1                                       | NP_057484.3       | 2          | 2                 | 2          | 4      | 1.17                                                     | 0.76                                                     | 0.03                                                                                   | 46.62                                                                                  | 0                                                                                             | 53.6                                                                                          | 2                                                                              | 2                                                                              |         |                |                                                                               |                                              |                       |                                  |                                                                  |                    |                          |
| MAP3K7      | 6885    | mitogen-activated protein kinase kinase kinase 7 isoform A                       | NP_003179.1       | 4          | 3                 | 3          | 4      | 1.17                                                     | 0.69                                                     | 6.3                                                                                    | 17.8                                                                                   | 10.4                                                                                          | 17.4                                                                                          | 2                                                                              | 2                                                                              | 4011    | 6885           | mitogen-activated protein kinase kinase kinase7                               | Protein serine/threonine kinase activity     | Cytoplasm;Nucleus     | Serine/threonine kinase          | Cell communication;Signal transduction                           | S_T_kinase;CC      | Yes                      |
| ZBTB80S     | 339487  | protein archease isoform 1                                                       | NP_848642.1       | 5          | 1                 | 1          | 1      | 1.17                                                     | 0.69                                                     |                                                                                        |                                                                                        |                                                                                               |                                                                                               | 1                                                                              | 1                                                                              | 12470   | 339487         | zinc finger and BTB domain containing opposite strand                         | Molecular function unknown                   | -                     | Unclassified                     | Biological_process unknown                                       | -                  | No                       |
| ASCC2       | 84164   | activating signal cointegrator 1 complex subunit 2 isoform 1                     | NP_115580.2       | 2          | 4                 | 4          | 7      | 1.17                                                     | 0.62                                                     | 2.18                                                                                   | 7.27                                                                                   | 5.1                                                                                           | 9.1                                                                                           | 4                                                                              | 4                                                                              | 16515   | 84164          | activating signal cointegrator 1 complex subunit 2                            | Transcription regulator activity             | Nucleus               | Transcription regulatory protein | Regulation of nucleobase, nucleotide and nucleic acid metabolism | CUE                | No                       |

Supplementary Table S1. List of quantified proteins in OKF6/TERT1-Smoke cells  
 Raigopalani *et al.*, 2017. Role of protein kinase N2 (PKN2) in cigarette smoke-mediated oncogenic transformation of oral cells

| Gene Symbol | Gene ID | Protein Description                                                                | Protein Accession | # Proteins | # Unique Peptides | # Peptides | # PSMs | OKF6/TERT1-Smoke/<br>OKF6/TERT1-Parental<br>(130/126) R1 | OKF6/TERT1-Smoke/<br>OKF6/TERT1-Parental<br>(128/127) R2 | Ratio Standard Errors [%]:<br>OKF6/TERT1-Smoke/<br>OKF6/TERT1-Parental<br>(130/126) R1 | Ratio Standard Errors [%]:<br>OKF6/TERT1-Smoke/<br>OKF6/TERT1-Parental<br>(128/127) R2 | Ratio Variabilities [%]:<br>F13: OKF6/TERT1-<br>Smoke/<br>OKF6/TERT1-Parental<br>(130/126) R1 | Ratio Variabilities [%]:<br>F13: OKF6/TERT1-<br>Smoke/<br>OKF6/TERT1-Parental<br>(128/127) R2 | Ratio Counts: F13:<br>OKF6/TERT1-Smoke/<br>OKF6/TERT1-Parental<br>(130/126) R1 | Ratio Counts: F13:<br>OKF6/TERT1-Smoke/<br>OKF6/TERT1-Parental<br>(128/127) R2 | HPRD ID | Entrez Gene Id | Gene Name                                                           | Molecular Function                         | Primary Localization | Molecular Class                    | Biological Process                                                                                                                    | Domains                 | Plasma Proteome Database |
|-------------|---------|------------------------------------------------------------------------------------|-------------------|------------|-------------------|------------|--------|----------------------------------------------------------|----------------------------------------------------------|----------------------------------------------------------------------------------------|----------------------------------------------------------------------------------------|-----------------------------------------------------------------------------------------------|-----------------------------------------------------------------------------------------------|--------------------------------------------------------------------------------|--------------------------------------------------------------------------------|---------|----------------|---------------------------------------------------------------------|--------------------------------------------|----------------------|------------------------------------|---------------------------------------------------------------------------------------------------------------------------------------|-------------------------|--------------------------|
| INTS6       | 26512   | integrator complex subunit 6 isoform a                                             | NP_036273.1       | 3          | 3                 | 3          | 4      | 1.17                                                     | 0.61                                                     | 6.43                                                                                   | 32.57                                                                                  | 13.1                                                                                          | 35.6                                                                                          | 3                                                                              | 3                                                                              | 5063    | 26512          | DEADH (Asp-Glu-Ala-Asp/His) box polypeptide 26                      | RNA binding                                | Nucleus              | RNA binding protein                | Regulation of nucleobase, nucleoside, nucleotide and nucleic acid metabolism                                                          | VWA                     | No                       |
| RPLP2       | 6181    | 60S acidic ribosomal protein P2                                                    | NP_000995.1       | 2          | 7                 | 8          | 60     | 1.17                                                     | 0.59                                                     | 1.92                                                                                   | 10.07                                                                                  | 12.6                                                                                          | 33.8                                                                                          | 31                                                                             | 31                                                                             | 1612    | 6181           | ribosomal protein, large P2                                         | Structural constituent of ribosome         | Cytoplasm            | Ribosomal subunit                  | Protein metabolism                                                                                                                    | -                       | Yes                      |
| EWSR1       | 2130    | RNA-binding protein EWS isoform 1                                                  | NP_053733.2       | 5          | 6                 | 6          | 19     | 1.16                                                     | 1.54                                                     | 7.65                                                                                   | 10.11                                                                                  | 30.1                                                                                          | 55.3                                                                                          | 11                                                                             | 11                                                                             | 592     | 2130           | Ewing sarcoma breakpoint region 1                                   | RNA binding                                | Nucleus              | RNA binding protein                | Regulation of nucleobase, nucleoside, nucleotide and nucleic acid metabolism                                                          | RRM2/ZnF_RBZ            | Yes                      |
| CDK11B      | 984     | cyclin-dependent kinase 11B isoform 1                                              | NP_001778.2       | 6          | 1                 | 8          | 16     | 1.16                                                     | 1.49                                                     |                                                                                        |                                                                                        |                                                                                               |                                                                                               | 1                                                                              | 1                                                                              | 8909    | 984            | cell division cycle 2-like 1 (PITSLRE proteins)                     | Protein serine/threonine kinase activity   | Nucleus/Cytoplasm    | Cell cycle control protein         | Cell communication, Signal transduction                                                                                               | CC,S_T_kinase           | Yes                      |
| TRIM28      | 10155   | transcription intermediary factor 1-beta                                           | NP_005753.1       | 1          | 30                | 30         | 135    | 1.16                                                     | 1.43                                                     | 3.32                                                                                   | 5.5                                                                                    | 33                                                                                            | 73.5                                                                                          | 69                                                                             | 70                                                                             | 3445    | 10155          | tripartite motif-containing 28                                      | Transcription regulator activity           | Nucleus              | Transcription regulatory protein   | Regulation of nucleobase, nucleoside, nucleotide and nucleic acid metabolism                                                          | RING,BOX,BC,CPHD,BROMO  | Yes                      |
| ARF4        | 378     | ADP-ribosylation factor 4                                                          | NP_001651.1       | 1          | 6                 | 9          | 61     | 1.16                                                     | 1.42                                                     | 4.37                                                                                   | 12.2                                                                                   | 18.5                                                                                          | 68.9                                                                                          | 13                                                                             | 13                                                                             | 3107    | 378            | ADP-ribosylation factor 4                                           | Transporter activity                       | Cytoplasm            | Transport/cargo protein            | Transport                                                                                                                             | ARF                     | Yes                      |
| CDC123      | 8872    | cell division cycle protein 123 homolog                                            | NP_006014.2       | 1          | 2                 | 2          | 5      | 1.16                                                     | 1.4                                                      | 21.64                                                                                  | 0.11                                                                                   | 45.6                                                                                          | 0.3                                                                                           | 3                                                                              | 3                                                                              | 12586   | 8872           | chromosome 10 open reading frame 7                                  | Molecular function unknown                 | Cytoplasm            | Cell cycle control protein         | Cell communication, Signal transduction                                                                                               | -                       | No                       |
| RCC1        | 1104    | regulator of chromosome condensation isoform a                                     | NP_001041659.1    | 3          | 8                 | 8          | 27     | 1.16                                                     | 1.36                                                     | 7.49                                                                                   | 4.66                                                                                   | 33.3                                                                                          | 24.2                                                                                          | 14                                                                             | 14                                                                             | 1559    | 1104           | regulator of chromosome condensation 1                              | Guanyl-nucleotide exchange factor activity | Nucleus              | Guanine nucleotide exchange factor | Cell communication, Signal transduction                                                                                               | -                       | Yes                      |
| AKR1B1      | 231     | aldose reductase                                                                   | NP_001619.1       | 1          | 9                 | 10         | 26     | 1.16                                                     | 1.29                                                     | 4.93                                                                                   | 8.02                                                                                   | 19.1                                                                                          | 35.3                                                                                          | 11                                                                             | 11                                                                             | 71      | 231            | aldo-keto reductase family 1, member B (aldose reductase)           | Oxidoreductase activity                    | Cytoplasm            | Enzyme: Oxidoreductase             | Metabolism;Energy pathways                                                                                                            | ALDKR                   | Yes                      |
| DDX27       | 55661   | probable ATP-dependent RNA helicase DDX27                                          | NP_060365.7       | 1          | 12                | 12         | 23     | 1.16                                                     | 1.28                                                     | 3.45                                                                                   | 4.43                                                                                   | 15                                                                                            | 21.5                                                                                          | 14                                                                             | 14                                                                             | 10859   | 55661          | DEAD (Asp-Glu-Ala-Asp) box polypeptide 27                           | Helicase activity                          | Nucleus              | RNA helicase                       | Regulation of nucleobase, nucleoside, nucleotide and nucleic acid metabolism                                                          | DEXDc,HELICc,C          | Yes                      |
| CDV3        | 55573   | protein CDV3 homolog isoform b                                                     | NP_060018.1       | 6          | 6                 | 6          | 14     | 1.16                                                     | 1.28                                                     | 7.12                                                                                   | 3.83                                                                                   | 23.6                                                                                          | 13.9                                                                                          | 8                                                                              | 8                                                                              | 13627   | 55573          | None                                                                | Molecular function unknown                 | Nucleus              | Unclassified                       | Cell proliferation                                                                                                                    | NLS                     | Yes                      |
| ABHD5       | 51099   | 1-acylglycerol-3-phosphate O-acyltransferase ABHD5                                 | NP_057090.2       | 1          | 1                 | 1          | 3      | 1.16                                                     | 1.27                                                     |                                                                                        |                                                                                        |                                                                                               |                                                                                               | 1                                                                              | 1                                                                              | 11986   | 51099          | abhydrolase domain containing 5                                     | Aminopeptidase activity                    | Cytoplasm            | Aminopeptidase                     | Protein metabolism                                                                                                                    | ABH                     | No                       |
| ITSN2       | 50618   | intersectin-2 isoform 1                                                            | NP_006268.2       | 3          | 1                 | 1          | 2      | 1.16                                                     | 1.23                                                     |                                                                                        |                                                                                        |                                                                                               |                                                                                               | 1                                                                              | 1                                                                              | 9193    | 50618          | intersectin 2                                                       | Protein domain specific binding            | Endosome;Cytoplasm   | Adapter molecule                   | Protein transport                                                                                                                     | EH,CC,SH3,RHO,GEF,PH,C2 | Yes                      |
| MALT1       | 10892   | mucosa-associated lymphoid tissue lymphoma translocation protein 1 isoform a       | NP_006776.1       | 2          | 1                 | 2          | 3      | 1.16                                                     | 1.23                                                     |                                                                                        |                                                                                        |                                                                                               |                                                                                               | 1                                                                              | 1                                                                              | 6892    | 10892          | mucosa associated lymphoid tissue lymphomatranslocation gene 1      | Endopeptidase activity                     | Cytoplasm            | Enzyme: Hydrolase                  | Regulation of signal transduction                                                                                                     | DEATH,IGCC2,Ig_LIKE     | Yes                      |
| NOL3        | 8996    | nucleolar protein 3 isoform D                                                      | NP_001263248.1    | 4          | 3                 | 3          | 7      | 1.16                                                     | 1.23                                                     | 0.79                                                                                   | 6.29                                                                                   | 1.6                                                                                           | 13.4                                                                                          | 3                                                                              | 3                                                                              | 5572    | 8996           | nucleolar protein 3 (apoptosis repressor withCARD domain)           | Protease inhibitor activity                | Nucleolus            | Cell cycle control protein         | Cell communication, Signal transduction                                                                                               | CARD                    | Yes                      |
| HNRNPUL1    | 11100   | heterogeneous nuclear ribonucleoprotein U-like protein 1 isoform a                 | NP_008971.2       | 2          | 21                | 21         | 57     | 1.16                                                     | 1.19                                                     | 4.41                                                                                   | 6.68                                                                                   | 28.5                                                                                          | 45.6                                                                                          | 30                                                                             | 30                                                                             | 10428   | 11100          | heterogeneous nuclear ribonucleoprotein U-like 1                    | Ribonucleoprotein :RNA binding             | Nucleus              | RNA binding protein                | Regulation of nucleobase, nucleoside, nucleotide and nucleic acid metabolism;RNA metabolism;Regulation of gene expression, epigenetic | SAP,SPRY                | Yes                      |
| EIF2B3      | 8891    | translation initiation factor eIF-2B subunit gamma isoform 1                       | NP_065098.1       | 3          | 8                 | 8          | 13     | 1.16                                                     | 1.18                                                     | 2.9                                                                                    | 4.98                                                                                   | 9.5                                                                                           | 16.7                                                                                          | 8                                                                              | 8                                                                              | 9379    | 8891           | eukaryotic translation initiation factor 2B, subunit 3 gamma, 59kDa | Translation regulator activity             | Cytoplasm            | Translation regulatory protein     | Protein metabolism                                                                                                                    | -                       | Yes                      |
| SDF4        | 51150   | 45 kDa calcium-binding protein isoform 2 precursor                                 | NP_057260.2       | 2          | 4                 | 4          | 7      | 1.16                                                     | 1.18                                                     | 7.1                                                                                    | 9.18                                                                                   | 16.6                                                                                          | 21.9                                                                                          | 4                                                                              | 4                                                                              | 13113   | 51150          | stromal cell derived factor 4                                       | Calcium ion binding                        | Golgi lumen          | Calcium binding protein            | Cell communication, Signal transduction                                                                                               | EF,SP                   | Yes                      |
| NRF1        | 4899    | nuclear respiratory factor 1 isoform 2                                             | NP_001280092.1    | 2          | 1                 | 1          | 2      | 1.16                                                     | 1.17                                                     |                                                                                        |                                                                                        |                                                                                               |                                                                                               | 1                                                                              | 1                                                                              | 2930    | 4899           | nuclear respiratory factor 1                                        | DNA binding                                | Nucleus              | DNA binding protein                | Regulation of nucleobase, nucleoside, nucleotide and nucleic acid metabolism                                                          | -                       | No                       |
| WDR82       | 80335   | WD repeat-containing protein 82                                                    | NP_079498.2       | 1          | 5                 | 5          | 8      | 1.16                                                     | 1.15                                                     | 6.73                                                                                   | 2.28                                                                                   | 17.5                                                                                          | 5.9                                                                                           | 5                                                                              | 5                                                                              | 15183   | 80335          | None                                                                | Molecular function unknown                 | Nucleus              | Integral membrane protein          | Biological process unknown                                                                                                            | WD40                    | No                       |
| SDHA        | 6389    | succinate dehydrogenase [ubiquinone] flavoprotein subunit, mitochondrial isoform 1 | NP_004159.2       | 2          | 24                | 24         | 72     | 1.16                                                     | 1.14                                                     | 2.93                                                                                   | 3.48                                                                                   | 20.7                                                                                          | 24.5                                                                                          | 36                                                                             | 37                                                                             | 2914    | 6389           | succinate dehydrogenase complex, subunit A, flavoprotein (Fp)       | Catalytic activity                         | Mitochondrion        | Enzyme: Dehydrogenase              | Metabolism;Energy pathways                                                                                                            | -                       | Yes                      |
| BSDC1       | 55108   | BSD domain-containing protein 1 isoform e                                          | NP_001287887.1    | 5          | 1                 | 1          | 1      | 1.16                                                     | 1.12                                                     |                                                                                        |                                                                                        |                                                                                               |                                                                                               | 1                                                                              | 1                                                                              | 7658    | 55108          | None                                                                | Molecular function unknown                 | -                    | Unclassified                       | Biological process unknown                                                                                                            | CC                      | No                       |
| TPBG        | 7162    | trophoblast glycoprotein precursor                                                 | NP_006661.1       | 1          | 7                 | 7          | 22     | 1.16                                                     | 1.11                                                     | 6.41                                                                                   | 4.55                                                                                   | 25.2                                                                                          | 16.8                                                                                          | 11                                                                             | 11                                                                             | 1837    | 7162           | trophoblast glycoprotein                                            | Molecular function unknown                 | Plasma membrane      | Integral membrane protein          | Cell growth and/or maintenance                                                                                                        | SP,TM,LR                | No                       |

Supplementary Table S1. List of quantified proteins in OKF6/TERT1-Smoke cells  
 Raingopaln *et al.*, 2017. Role of protein kinase N2 (PKN2) in cigarette smoke-mediated oncogenic transformation of oral cells

| Gene Symbol | Gene ID | Protein Description                                                  | Protein Accession | # Proteins | # Unique Peptides | # Peptides | # PSMs | OKF6/TERT1-Smoke/<br>OKF6/TERT1-Parental<br>(130/126) R1 | OKF6/TERT1-Smoke/<br>OKF6/TERT1-Parental<br>(128/127) R2 | Ratio Standard Errors [%]:<br>OKF6/TERT1-Smoke/<br>OKF6/TERT1-Parental<br>(130/126) R1 | Ratio Standard Errors [%]:<br>OKF6/TERT1-Smoke/<br>OKF6/TERT1-Parental<br>(128/127) R2 | Ratio Variabilities [%]:<br>F13: OKF6/TERT1-<br>Smoke/<br>OKF6/TERT1-Parental<br>(130/126) R1 | Ratio Variabilities [%]:<br>F13: OKF6/TERT1-<br>Smoke/<br>OKF6/TERT1-Parental<br>(128/127) R2 | Ratio Counts: F13:<br>OKF6/TERT1-Smoke/<br>OKF6/TERT1-Parental<br>(130/126) R1 | Ratio Counts: F13:<br>OKF6/TERT1-Smoke/<br>OKF6/TERT1-Parental<br>(128/127) R2 | HPRD ID | Entrez Gene ID | Gene Name                                                        | Molecular Function                       | Primary Localization | Molecular Class                  | Biological Process                                                                               | Domains               | Plasma Proteome Database |
|-------------|---------|----------------------------------------------------------------------|-------------------|------------|-------------------|------------|--------|----------------------------------------------------------|----------------------------------------------------------|----------------------------------------------------------------------------------------|----------------------------------------------------------------------------------------|-----------------------------------------------------------------------------------------------|-----------------------------------------------------------------------------------------------|--------------------------------------------------------------------------------|--------------------------------------------------------------------------------|---------|----------------|------------------------------------------------------------------|------------------------------------------|----------------------|----------------------------------|--------------------------------------------------------------------------------------------------|-----------------------|--------------------------|
| G3BP1       | 10146   | ras GTPase-activating protein-binding protein 1                      | NP_005745.1       | 1          | 15                | 15         | 95     | 1.16                                                     | 1.1                                                      | 3.44                                                                                   | 3.73                                                                                   | 29.3                                                                                          | 30.1                                                                                          | 52                                                                             | 52                                                                             | 6569    | 10146          | None                                                             | Ribonuclease activity;RNA binding        | Cytosol              | RNA binding protein;Ribonuclease | Regulation of nucleobase, nucleoside, nucleotide and nucleic acid metabolism;Signal transduction | RRM                   | Yes                      |
| BAZ1A       | 11177   | bromodomain adjacent to zinc finger domain protein 1A isoform a      | NP_038476.2       | 2          | 3                 | 3          | 4      | 1.16                                                     | 1.1                                                      | 5.5                                                                                    | 31.48                                                                                  | 11.1                                                                                          | 65.8                                                                                          | 3                                                                              | 3                                                                              | 12034   | 11177          | bromodomain adjacent to zinc finger domain, 1A                   | DNA binding                              | Nucleus              | DNA binding protein              | Regulation of nucleobase, nucleoside, nucleotide and nucleic acid metabolism                     | CC;PHD;BROM O;AT_book | Yes                      |
| ARFGAP1     | 55738   | ADP-ribosylation factor GTPase-activating protein 1 isoform b        | NP_783202.1       | 5          | 4                 | 4          | 7      | 1.16                                                     | 1.1                                                      | 6.08                                                                                   | 3.77                                                                                   | 15.8                                                                                          | 9.3                                                                                           | 5                                                                              | 5                                                                              | 6443    | 55738          | ADP-ribosylation factor GTPase activating protein 1              | GTPase activator activity                | Golgi apparatus      | GTPase activating protein        | Lipid metabolism;Protein transport                                                               | ARFGAP                | Yes                      |
| WBP11       | 51729   | WW domain-binding protein 11                                         | NP_057396.1       | 1          | 6                 | 6          | 13     | 1.16                                                     | 1.1                                                      | 4.35                                                                                   | 5.15                                                                                   | 13.4                                                                                          | 15.1                                                                                          | 7                                                                              | 7                                                                              | 18293   | 51729          | WW domain binding protein 11                                     | RNA binding                              | Nucleus              | RNA binding protein              | Regulation of nucleobase, nucleoside, nucleotide and nucleic acid metabolism                     | CC;NLS                | No                       |
| COL4A3BP    | 10087   | collagen type IV alpha-3-binding protein isoform 3                   | NP_001123577.1    | 3          | 6                 | 6          | 14     | 1.16                                                     | 1.08                                                     | 4.61                                                                                   | 4.39                                                                                   | 15.2                                                                                          | 13.5                                                                                          | 8                                                                              | 8                                                                              | 5246    | 10087          | collagen, type IV, alpha 3 (Goodpasture antigen) binding protein | Protein serine/threonine kinase activity | Cytoplasm            | Serine/threonine kinase          | Signal transduction                                                                              | PH;START;CC           | Yes                      |
| TSSC1       | 7260    | protein TSSC1                                                        | NP_003301.1       | 1          | 2                 | 2          | 4      | 1.16                                                     | 1.07                                                     | 1.25                                                                                   | 23                                                                                     | 2.1                                                                                           | 35.9                                                                                          | 2                                                                              | 2                                                                              | 10287   | 7260           | tumor suppressing substrate for candidate 1                      | Molecular function unknown               | -                    | Unclassified                     | Biological process unknown                                                                       | WD40                  | No                       |
| PRPF40A     | 55660   | pre-mRNA-processing factor 40 homolog A                              | NP_060362.3       | 1          | 14                | 14         | 34     | 1.16                                                     | 1.03                                                     | 4.75                                                                                   | 6.89                                                                                   | 22.2                                                                                          | 29                                                                                            | 16                                                                             | 16                                                                             | 10995   | 55660          | formin binding protein 3                                         | RNA binding                              | Nucleus;Cytoplasm    | RNA binding protein              | Regulation of nucleobase, nucleoside, nucleotide and nucleic acid metabolism                     | FF;NLS;WW             | Yes                      |
| NXF1        | 10482   | nuclear RNA export factor 1 isoform 1                                | NP_006353.2       | 2          | 14                | 14         | 25     | 1.16                                                     | 1.02                                                     | 4.76                                                                                   | 6.37                                                                                   | 20.8                                                                                          | 24.7                                                                                          | 14                                                                             | 14                                                                             | 4035    | 10482          | nuclear RNA export factor 1                                      | RNA binding                              | Nucleus              | RNA binding protein              | Regulation of nucleobase, nucleoside, nucleotide and nucleic acid metabolism                     | -                     | Yes                      |
| PSMG1       | 8624    | proteasome assembly chaperone 1 isoform a                            | NP_003711.1       | 3          | 6                 | 6          | 8      | 1.16                                                     | 1.02                                                     | 3.95                                                                                   | 19.66                                                                                  | 10.3                                                                                          | 47.4                                                                                          | 5                                                                              | 5                                                                              | 5598    | 8624           | Down syndrome critical region gene 2                             | Molecular function unknown               | Plasma membrane      | Unclassified                     | Cell communication;Signal transduction                                                           | -                     | No                       |
| TRMT5       | 57570   | tRNA (guanine(37)-N1)-methyltransferase                              | NP_065861.3       | 1          | 4                 | 4          | 6      | 1.16                                                     | 1.02                                                     | 9.73                                                                                   | 14.51                                                                                  | 22.8                                                                                          | 30.3                                                                                          | 4                                                                              | 4                                                                              | 17213   | 57570          | KIAA1393                                                         | Methyltransferase activity               | -                    | Enzyme: Methyltransferase        | Metabolism;Energy pathways                                                                       | -                     | No                       |
| CHMP5       | 51510   | charged multivesicular body protein 5 isoform 1                      | NP_057494.3       | 2          | 8                 | 8          | 54     | 1.16                                                     | 1.02                                                     | 6.09                                                                                   | 4.88                                                                                   | 34                                                                                            | 23.8                                                                                          | 22                                                                             | 22                                                                             | 15408   | 51510          | chromatin modifying protein 5                                    | Transporter activity                     | -                    | Transport/cargo protein          | Transport                                                                                        | -                     | Yes                      |
| SAE1        | 10055   | SUMO-activating enzyme subunit 1 isoform a                           | NP_005491.1       | 3          | 13                | 13         | 22     | 1.16                                                     | 1.01                                                     | 10.32                                                                                  | 7.9                                                                                    | 45.3                                                                                          | 29.5                                                                                          | 13                                                                             | 13                                                                             | 18010   | 10055          | None                                                             | Ligase activity                          | Nucleus              | Enzyme: Ligase                   | Metabolism;Energy pathways                                                                       | -                     | Yes                      |
| NCAPH       | 23397   | condensin complex subunit 2 isoform 1                                | NP_056156.2       | 4          | 9                 | 9          | 14     | 1.16                                                     | 1.01                                                     | 5.65                                                                                   | 8.79                                                                                   | 19.9                                                                                          | 27.2                                                                                          | 9                                                                              | 9                                                                              | 3820    | 23397          | barren homolog (Drosophila)                                      | Molecular function unknown               | Nucleolus            | Cell cycle control protein       | Cell growth and/or maintenance                                                                   | -                     | Yes                      |
| ZPC3H1      | 196441  | zinc finger C3H1 domain-containing protein                           | NP_659419.3       | 1          | 3                 | 3          | 5      | 1.16                                                     | 0.99                                                     | 1.06                                                                                   | 11.84                                                                                  | 2.1                                                                                           | 20.5                                                                                          | 3                                                                              | 3                                                                              | 14489   | 196441         | None                                                             | Molecular function unknown               | -                    | Unclassified                     | Biological process unknown                                                                       | HAT;CC                | Yes                      |
| PNPT1       | 87178   | polyribonucleotide nucleotidyltransferase 1, mitochondrial precursor | NP_149100.2       | 1          | 16                | 16         | 30     | 1.16                                                     | 0.98                                                     | 6.13                                                                                   | 10.4                                                                                   | 30                                                                                            | 43.9                                                                                          | 17                                                                             | 17                                                                             | 18493   | 87178          | polyribonucleotide nucleotidyltransferase 1                      | Exonuclease activity                     | Mitochondrion        | RNA exonuclease                  | Regulation of nucleobase, nucleoside, nucleotide and nucleic acid metabolism                     | KH;SI                 | No                       |
| ZNF593      | 51042   | zinc finger protein 593                                              | NP_056955.2       | 1          | 3                 | 3          | 4      | 1.16                                                     | 0.97                                                     | 0.34                                                                                   | 15.72                                                                                  | 0.7                                                                                           | 26.7                                                                                          | 3                                                                              | 3                                                                              | 15866   | 51042          | zinc finger protein 593                                          | Transcription regulator activity         | Nucleus              | Transcription regulatory protein | Regulation of nucleobase, nucleoside, nucleotide and nucleic acid metabolism                     | -                     | Yes                      |
| MRP57       | 51081   | 28S ribosomal protein S7, mitochondrial                              | NP_057055.2       | 1          | 7                 | 7          | 18     | 1.16                                                     | 0.96                                                     | 4.24                                                                                   | 8.08                                                                                   | 15.6                                                                                          | 24.9                                                                                          | 10                                                                             | 10                                                                             | 17601   | 51081          | mitochondrial ribosomal protein S7                               | Structural constituent of ribosome       | Mitochondrion        | Ribosomal subunit                | Protein metabolism                                                                               | -                     | No                       |
| PTGES2      | 80142   | prostaglandin H synthase 2 isoform 1                                 | NP_079348.1       | 2          | 10                | 10         | 33     | 1.16                                                     | 0.96                                                     | 4.34                                                                                   | 5.58                                                                                   | 20.4                                                                                          | 21.6                                                                                          | 16                                                                             | 16                                                                             | 7458    | 80142          | prostaglandin H synthase 2                                       | Isomerase activity                       | Nucleus              | Enzyme: Isomerase                | Metabolism;Energy pathways                                                                       | -                     | No                       |
| RPL7A       | 6130    | 60S ribosomal protein L7a                                            | NP_000963.1       | 1          | 15                | 16         | 83     | 1.16                                                     | 0.95                                                     | 2.62                                                                                   | 2.82                                                                                   | 20.2                                                                                          | 17.7                                                                                          | 43                                                                             | 43                                                                             | 1712    | 6130           | ribosomal protein L7a                                            | Structural constituent of ribosome       | Cytoplasm            | Ribosomal subunit                | Protein metabolism                                                                               | NLS                   | Yes                      |
| PRRC2C      | 23215   | protein PRRC2C                                                       | NP_055987.2       | 1          | 27                | 30         | 54     | 1.16                                                     | 0.95                                                     | 3.54                                                                                   | 3.44                                                                                   | 21.6                                                                                          | 17.1                                                                                          | 27                                                                             | 27                                                                             |         |                |                                                                  |                                          |                      |                                  |                                                                                                  |                       |                          |
| HTATSF1     | 27336   | HIV Tat-specific factor 1                                            | NP_055315.2       | 1          | 8                 | 8          | 13     | 1.16                                                     | 0.92                                                     | 11.02                                                                                  | 9                                                                                      | 37.2                                                                                          | 23.6                                                                                          | 8                                                                              | 8                                                                              | 2282    | 27336          | HIV Tat specific factor 1                                        | Transcription factor activity            | Nucleus              | Transcription factor             | Regulation of nucleobase, nucleoside, nucleotide and nucleic acid metabolism                     | RRM                   | No                       |
| SPCS2       | 9789    | signal peptidase complex subunit 2                                   | NP_055567.2       | 1          | 5                 | 5          | 17     | 1.16                                                     | 0.91                                                     | 3.29                                                                                   | 9.26                                                                                   | 11.5                                                                                          | 25.8                                                                                          | 9                                                                              | 9                                                                              | 15435   | 9789           | signal peptidase complex subunit 2 homolog (S.cerevisiae)        | Peptidase activity                       | Microsome            | Protease                         | Protein metabolism                                                                               | -                     | Yes                      |
| HEATR5B     | 54497   | HEAT repeat-containing protein 5B                                    | NP_061897.1       | 1          | 1                 | 1          | 2      | 1.16                                                     | 0.9                                                      |                                                                                        |                                                                                        |                                                                                               |                                                                                               | 1                                                                              | 1                                                                              | 11145   | 54497          | None                                                             | Molecular function unknown               | -                    | Unclassified                     | Biological process unknown                                                                       | SP                    | No                       |
| BRI3BP      | 140707  | BRI3-binding protein precursor                                       | NP_542193.3       | 1          | 3                 | 3          | 8      | 1.16                                                     | 0.89                                                     | 4.12                                                                                   | 6.56                                                                                   | 10.8                                                                                          | 13.1                                                                                          | 5                                                                              | 5                                                                              | 9829    | 140707         | BRI3 binding protein                                             | Molecular function unknown               | -                    | Integral membrane protein        | Biological process unknown                                                                       | TM;CC                 | No                       |
| BAG6        | 7917    | large proline-rich protein BAG6 isoform a                            | NP_004630.3       | 4          | 11                | 11         | 30     | 1.16                                                     | 0.88                                                     | 2.8                                                                                    | 10.58                                                                                  | 11.8                                                                                          | 32.9                                                                                          | 13                                                                             | 12                                                                             |         |                |                                                                  |                                          |                      |                                  |                                                                                                  |                       |                          |
| RPL32       | 6161    | 60S ribosomal protein L32                                            | NP_000985.1       | 1          | 9                 | 9          | 40     | 1.16                                                     | 0.86                                                     | 6.2                                                                                    | 10.51                                                                                  | 30.4                                                                                          | 38.8                                                                                          | 17                                                                             | 17                                                                             | 17995   | 6161           | ribosomal protein L32                                            | Structural constituent of ribosome       | Ribosome             | Ribosomal subunit                | Protein metabolism                                                                               | -                     | Yes                      |





Supplementary Table S1. List of quantified proteins in OKF6/TERT1-Smoke cells  
 Raingonalan *et al.*, 2017. Role of protein kinase N2 (PKN2) in cigarette smoke-mediated oncogenic transformation of oral cells

| Gene Symbol | Gene ID | Protein Description                                                 | Protein Accession | # Proteins | # Unique Peptides | # Peptides | # PSMs | OKF6/TERT1-Smoke/<br>OKF6/TERT1-Parental<br>(130/126) R1 | OKF6/TERT1-Smoke/<br>OKF6/TERT1-Parental<br>(128/127) R2 | Ratio Standard Errors [%]:<br>OKF6/TERT1-Smoke/<br>OKF6/TERT1-Parental<br>(130/126) R1 | Ratio Standard Errors [%]:<br>OKF6/TERT1-Smoke/<br>OKF6/TERT1-Parental<br>(128/127) R2 | Ratio Variabilities [%]:<br>F13: OKF6/TERT1-<br>Smoke/<br>OKF6/TERT1-Parental<br>(130/126) R1 | Ratio Variabilities [%]:<br>F13: OKF6/TERT1-<br>Smoke/<br>OKF6/TERT1-Parental<br>(128/127) R2 | Ratio Counts: F13:<br>OKF6/TERT1-Smoke/<br>OKF6/TERT1-Parental<br>(130/126) R1 | Ratio Counts: F13:<br>OKF6/TERT1-Smoke/<br>OKF6/TERT1-Parental<br>(128/127) R2 | HPRD ID | Entrez Gene Id | Gene Name                                                                                     | Molecular Function                           | Primary Localization  | Molecular Class                     | Biological Process                                                                                                     | Domains                          | Plasma Proteome Database |
|-------------|---------|---------------------------------------------------------------------|-------------------|------------|-------------------|------------|--------|----------------------------------------------------------|----------------------------------------------------------|----------------------------------------------------------------------------------------|----------------------------------------------------------------------------------------|-----------------------------------------------------------------------------------------------|-----------------------------------------------------------------------------------------------|--------------------------------------------------------------------------------|--------------------------------------------------------------------------------|---------|----------------|-----------------------------------------------------------------------------------------------|----------------------------------------------|-----------------------|-------------------------------------|------------------------------------------------------------------------------------------------------------------------|----------------------------------|--------------------------|
| NFATC2IP    | 84901   | NFATC2-interacting protein                                          | NP_116204.3       | 1          | 3                 | 3          | 7      | 1.15                                                     | 1                                                        | 11.23                                                                                  | 16.68                                                                                  | 26.3                                                                                          | 34.4                                                                                          | 4                                                                              | 4                                                                              | 10971   | 84901          | nuclear factor of activated T-cells, cytoplasmic, calcineurin-dependent 2 interacting protein | Molecular function unknown                   | -                     | Unclassified                        | Protein metabolism                                                                                                     | UBQ                              | No                       |
| YWHAB       | 7529    | 14-3-3 protein beta1alpha                                           | NP_003395.1       | 1          | 7                 | 14         | 147    | 1.15                                                     | 0.99                                                     | 3.86                                                                                   | 7.4                                                                                    | 24.2                                                                                          | 40.4                                                                                          | 29                                                                             | 28                                                                             | 3184    | 7529           | tyrosine 3-monooxygenase/tryptophan 5-monooxygenase activation protein, beta polypeptide      | Receptor signaling complex scaffold activity | Cytoplasm             | Adapter molecule                    | Signal transduction                                                                                                    | CC                               | Yes                      |
| SMARCA2     | 6595    | probable global transcription activator SNF2L2 isoform a            | NP_001276325.1    | 6          | 2                 | 5          | 7      | 1.15                                                     | 0.99                                                     | 29.66                                                                                  | 27.72                                                                                  | 51.1                                                                                          | 40.4                                                                                          | 2                                                                              | 2                                                                              | 2483    | 6595           | SWI5NF related, matrix associated, independent regulator of chromatin, subfamily a, member 2  | Transcription factor activity                | Nucleus/Cytoplasm     | Transcription factor                | Regulation of nucleobase, nucleoside and nucleic acid metabolism                                                       | BRK;HELIC;BR OMO;DEXDc;CC        | Yes                      |
| GARS        | 2617    | glycine-tRNA ligase precursor                                       | NP_002038.2       | 1          | 24                | 24         | 101    | 1.15                                                     | 0.99                                                     | 4.6                                                                                    | 7.32                                                                                   | 38.6                                                                                          | 54.6                                                                                          | 50                                                                             | 50                                                                             | 2617    | 2617           | glycyl-tRNA synthetase                                                                        | Ligase activity                              | Cytoplasm             | Enzyme: Ligase                      | Protein metabolism                                                                                                     | SP                               | Yes                      |
| CDC5L       | 988     | cell division cycle 5-like protein                                  | NP_001244.1       | 1          | 21                | 21         | 46     | 1.15                                                     | 0.98                                                     | 4.14                                                                                   | 5.25                                                                                   | 23.7                                                                                          | 25.7                                                                                          | 24                                                                             | 24                                                                             | 4184    | 988            | CDC5 cell division cycle 5-like (S. pombe)                                                    | Protein binding                              | Nucleus               | Cell cycle control protein          | Cell communication;Signal transduction                                                                                 | SANT;CC                          | Yes                      |
| PGAM5       | 192111  | serine/threonine-protein phosphatase PGAM5, mitochondrial isoform 2 | NP_001164015.1    | 1          | 1                 | 8          | 13     | 1.15                                                     | 0.98                                                     |                                                                                        |                                                                                        |                                                                                               |                                                                                               | 1                                                                              | 1                                                                              | 14681   | 192111         |                                                                                               | Catalytic activity                           | Cytosol               | Enzyme: Mutase                      | Metabolism;Energy pathways                                                                                             | SP                               | No                       |
| LSM2        | 57819   | U6 snRNA-associated Sm-like protein LSM2                            | NP_067000.1       | 1          | 4                 | 4          | 7      | 1.15                                                     | 0.97                                                     | 7.68                                                                                   | 12.91                                                                                  | 19.9                                                                                          | 28.6                                                                                          | 5                                                                              | 5                                                                              | 6282    | 57819          | LSM2 homolog, U6 small nuclear RNA associated (S. cerevisiae)                                 | RNA binding                                  | Cytoplasm             | RNA binding protein                 | Regulation of nucleobase, nucleoside, nucleotide and nucleic acid metabolism                                           | SM                               | Yes                      |
| SLC7A1      | 6541    | high affinity cationic amino acid transporter 1                     | NP_003036.1       | 1          | 1                 | 1          | 1      | 1.15                                                     | 0.97                                                     |                                                                                        |                                                                                        |                                                                                               |                                                                                               | 1                                                                              | 1                                                                              | 91      | 6541           | solute carrier family 7 (cationic amino acid/transporter, y+ system), member 1                | Auxiliary transport protein activity         | Plasma membrane       | Membrane transport protein          | Transport                                                                                                              | TM                               | Yes                      |
| SLC25A22    | 79751   | mitochondrial glutamate carrier 1                                   | NP_078974.1       | 2          | 8                 | 8          | 20     | 1.15                                                     | 0.96                                                     | 7.24                                                                                   | 9.65                                                                                   | 22.3                                                                                          | 24.9                                                                                          | 7                                                                              | 7                                                                              | 15356   | 79751          | solute carrier family 25 (mitochondrial carrier; glutamate), member 22                        | Auxiliary transport protein activity         | Mitochondrion         | Membrane transport protein          | Transport                                                                                                              | TM                               | Yes                      |
| RPS3A       | 6189    | 40S ribosomal protein S3a isoform 1                                 | NP_000997.1       | 2          | 21                | 21         | 102    | 1.15                                                     | 0.94                                                     | 2.54                                                                                   | 3.56                                                                                   | 21.9                                                                                          | 25.2                                                                                          | 55                                                                             | 55                                                                             | 1606    | 6189           | ribosomal protein S3A                                                                         | Structural constituent of ribosome           | Cytoplasm             | Ribosomal subunit                   | Protein metabolism                                                                                                     | -                                | Yes                      |
| METT16      | 79066   | methyltransferase-like protein 16                                   | NP_076991.3       | 1          | 2                 | 2          | 2      | 1.15                                                     | 0.93                                                     |                                                                                        |                                                                                        |                                                                                               |                                                                                               | 1                                                                              | 1                                                                              |         |                |                                                                                               |                                              |                       |                                     |                                                                                                                        |                                  |                          |
| NAPG        | 8774    | gamma-soluble NSF attachment protein                                | NP_003817.1       | 1          | 2                 | 2          | 3      | 1.15                                                     | 0.92                                                     |                                                                                        |                                                                                        |                                                                                               |                                                                                               | 1                                                                              | 1                                                                              | 4448    | 8774           | N-ethylmaleimide-sensitive factor attachment protein, gamma                                   | Auxiliary transport protein activity         | Golgi apparatus       | Membrane transport protein          | Transport                                                                                                              | -                                | Yes                      |
| EPB41L2     | 2037    | band 4.1-like protein 2 isoform a                                   | NP_001422.1       | 4          | 10                | 10         | 15     | 1.15                                                     | 0.92                                                     | 8.47                                                                                   | 9                                                                                      | 28                                                                                            | 23.6                                                                                          | 8                                                                              | 8                                                                              | 9126    | 2037           | erythrocyte membrane protein band 4.1-like 2                                                  | Structural constituent of cytoskeleton       | Plasma membrane       | Cytoskeletal protein                | Cell communication;Signal transduction                                                                                 | B41;CC                           | Yes                      |
| PSMB10      | 5699    | proteasome subunit beta type-10 precursor                           | NP_002792.1       | 1          | 1                 | 1          | 4      | 1.15                                                     | 0.91                                                     | 28.43                                                                                  | 4.82                                                                                   | 48.9                                                                                          | 6.2                                                                                           | 2                                                                              | 2                                                                              | 1465    | 5699           | proteasome (prosome; macropain) subunit, beta type, 10                                        | Ubiquitin-specific protease activity         | Cytoplasm             | Ubiquitin proteasome system protein | Protein metabolism                                                                                                     | -                                | Yes                      |
| KNOP1       | 400506  | lysine-rich nucleolar protein 1                                     | NP_001013009.2    | 1          | 2                 | 2          | 4      | 1.15                                                     | 0.91                                                     | 6.25                                                                                   | 3.78                                                                                   | 10.2                                                                                          | 4.8                                                                                           | 2                                                                              | 2                                                                              |         |                |                                                                                               |                                              |                       |                                     |                                                                                                                        |                                  |                          |
| IQGAP2      | 10788   | ras GTPase-activating-like protein IQGAP2 isoform 1                 | NP_006624.2       | 6          | 2                 | 5          | 15     | 1.15                                                     | 0.9                                                      | 21.5                                                                                   | 0.51                                                                                   | 36.1                                                                                          | 0.7                                                                                           | 2                                                                              | 2                                                                              | 9253    | 10788          | IQ motif containing GTPase activating protein2                                                | GTPase activator activity                    | Cytoplasm             | GTPase activating protein           | Cell communication;Signal transduction                                                                                 | CC;CH;IQ;RASG AP;WW              | Yes                      |
| TPX2        | 22974   | targeting protein for Xklp2                                         | NP_036244.2       | 1          | 1                 | 1          | 1      | 1.15                                                     | 0.9                                                      |                                                                                        |                                                                                        |                                                                                               |                                                                                               | 1                                                                              | 1                                                                              | 5802    | 22974          | TPX2, microtubule-associated protein homolog (Xenopus laevis)                                 | ATP binding                                  | Nucleus               | Cell cycle control protein          | Cell growth and/or maintenance;Spindle assembly                                                                        | CC                               | Yes                      |
| KIFAP3      | 22920   | kinesin-associated protein 3 isoform 1                              | NP_055785.2       | 4          | 4                 | 4          | 13     | 1.15                                                     | 0.89                                                     | 9.57                                                                                   | 15.32                                                                                  | 27.4                                                                                          | 34.3                                                                                          | 6                                                                              | 6                                                                              | 3499    | 22920          | kinesin-associated protein 3                                                                  | Transporter activity                         | Cytoplasm             | Transport/cargo protein             | Transport                                                                                                              | ARM                              | Yes                      |
| COX15       | 1355    | cytochrome c oxidase assembly protein COX15 homolog isoform 1       | NP_510870.1       | 2          | 2                 | 2          | 3      | 1.15                                                     | 0.89                                                     | 13.52                                                                                  | 20.19                                                                                  | 22.2                                                                                          | 25.9                                                                                          | 2                                                                              | 2                                                                              | 4707    | 1355           | COX15 homolog, cytochrome c oxidase assembly protein (yeast)                                  | Molecular function unknown                   | Mitochondrion         | Unclassified                        | Metabolism;Energy pathways                                                                                             | TM                               | Yes                      |
| CAMLG       | 819     | calcium signal-modulating cyclophilin ligand                        | NP_001736.1       | 1          | 2                 | 2          | 3      | 1.15                                                     | 0.88                                                     |                                                                                        |                                                                                        |                                                                                               |                                                                                               | 1                                                                              | 1                                                                              | 3073    | 819            | calcium modulating ligand                                                                     | Receptor binding                             | Endoplasmic reticulum | Membrane bound ligand               | Cell communication;Signal transduction                                                                                 | TM                               | Yes                      |
| EXT2        | 2132    | exostosin-2 isoform 1                                               | NP_000392.3       | 3          | 2                 | 2          | 2      | 1.15                                                     | 0.86                                                     | 31.2                                                                                   | 64.45                                                                                  | 54.2                                                                                          | 92.6                                                                                          | 2                                                                              | 2                                                                              | 599     | 2132           | exostosin (multiple) 2                                                                        | Transferase activity                         | Endoplasmic reticulum | Enzyme: Glycosyltransferase         | Metabolism;Energy pathways;Glycosaminoglycan metabolism                                                                | TM                               | Yes                      |
| BAZ1B       | 9031    | tyrosine-protein kinase BAZ1B                                       | NP_115784.1       | 1          | 8                 | 8          | 12     | 1.15                                                     | 0.8                                                      | 8.7                                                                                    | 5.74                                                                                   | 22.7                                                                                          | 10.3                                                                                          | 5                                                                              | 5                                                                              | 10416   | 9031           | bromodomain adjacent to zinc finger domain, 1B                                                | Transcription regulator activity             | Nucleus/Cytoplasm     | Transcription regulatory protein    | Regulation of nucleobase, nucleoside, nucleotide and nucleic acid metabolism;Regulation of gene expression, epigenetic | CC;PHD;BROM O;PEST;NLS;DD T;RING | Yes                      |

Supplementary Table S1. List of quantified proteins in OKF6/TERT1-Smoke cells  
 Raigopaln *et al.*, 2017. Role of protein kinase N2 (PKN2) in cigarette smoke-mediated oncogenic transformation of oral cells

| Gene Symbol | Gene ID | Protein Description                                                          | Protein Accession | # Proteins | # Unique Peptides | # Peptides | # PSMs | OKF6/TERT1-Smoke/<br>OKF6/TERT1-Parental<br>(130/126) R1 | OKF6/TERT1-Smoke/<br>OKF6/TERT1-Parental<br>(128/127) R2 | Ratio Standard Errors [%]:<br>OKF6/TERT1-Smoke/<br>OKF6/TERT1-Parental<br>(130/126) R1 | Ratio Standard Errors [%]:<br>OKF6/TERT1-Smoke/<br>OKF6/TERT1-Parental<br>(128/127) R2 | Ratio Variabilities [%]:<br>F13: OKF6/TERT1-<br>Smoke/<br>OKF6/TERT1-Parental<br>(130/126) R1 | Ratio Variabilities [%]:<br>F13: OKF6/TERT1-<br>Smoke/<br>OKF6/TERT1-Parental<br>(128/127) R2 | Ratio Counts: F13:<br>OKF6/TERT1-Smoke/<br>OKF6/TERT1-Parental<br>(130/126) R1 | Ratio Counts: F13:<br>OKF6/TERT1-Smoke/<br>OKF6/TERT1-Parental<br>(128/127) R2 | HPRD ID | Entrez Gene ID | Gene Name                                                                  | Molecular Function                                                      | Primary Localization                 | Molecular Class                     | Biological Process                                                | Domains                              | Plasma Proteome Database |
|-------------|---------|------------------------------------------------------------------------------|-------------------|------------|-------------------|------------|--------|----------------------------------------------------------|----------------------------------------------------------|----------------------------------------------------------------------------------------|----------------------------------------------------------------------------------------|-----------------------------------------------------------------------------------------------|-----------------------------------------------------------------------------------------------|--------------------------------------------------------------------------------|--------------------------------------------------------------------------------|---------|----------------|----------------------------------------------------------------------------|-------------------------------------------------------------------------|--------------------------------------|-------------------------------------|-------------------------------------------------------------------|--------------------------------------|--------------------------|
| SAP18       | 10284   | histone deacetylase complex subunit SAP18                                    | NP_005861.2       | 1          | 2                 | 2          | 3      | 1.15                                                     | 0.79                                                     | 0.64                                                                                   | 8.84                                                                                   | 1                                                                                             | 9.9                                                                                           | 2                                                                              | 2                                                                              | 4256    | 10284          | sin3-associated polypeptide, 18kDa                                         | Transcription regulator activity                                        | Nucleus                              | Transcription regulatory protein    | Regulation of nucleobase, nucleoside, and nucleic acid metabolism | -                                    | No                       |
| NUTF2       | 10204   | nuclear transport factor 2                                                   | NP_005787.1       | 1          | 1                 | 1          | 4      | 1.15                                                     | 0.7                                                      | 22.53                                                                                  | 66.17                                                                                  | 47.2                                                                                          | 94.6                                                                                          | 3                                                                              | 3                                                                              | 12050   | 10204          | nuclear transport factor 2                                                 | Transporter activity                                                    | Cytoplasm                            | Transport/cargo protein             | Transport                                                         | -                                    | Yes                      |
| KDM2A       | 22992   | lysine-specific demethylase 2A isoform a                                     | NP_036440.1       | 2          | 3                 | 3          | 4      | 1.15                                                     | 0.68                                                     | 4.73                                                                                   | 60.51                                                                                  | 7.7                                                                                           | 63.5                                                                                          | 2                                                                              | 2                                                                              | 5741    | 22992          | F-box and leucine-rich repeat protein 11                                   | Ubiquitin-specific protease activity                                    | Nucleus                              | Ubiquitin proteasome system protein | Protein metabolism; Regulation of gene expression, epigenetic     | JMJC;PHD;F;BO X;LRR                  | Yes                      |
| HEATR3      | 55027   | HEAT repeat-containing protein 3                                             | NP_891552.1       | 1          | 2                 | 2          | 3      | 1.15                                                     | 0.66                                                     | 0.59                                                                                   | 89.75                                                                                  | 1                                                                                             | 100.9                                                                                         | 2                                                                              | 2                                                                              | 7945    | 55027          | None                                                                       | Molecular function unknown                                              | -                                    | Unclassified                        | Biological process unknown                                        | -                                    | Yes                      |
| AVL9        | 23080   | late secretory pathway protein AVL9 homolog                                  | NP_055875.1       | 1          | 1                 | 1          | 3      | 1.15                                                     | 0.62                                                     |                                                                                        |                                                                                        |                                                                                               |                                                                                               | 1                                                                              | 1                                                                              | 13788   | 23080          | None                                                                       | Molecular function unknown                                              | -                                    | Unclassified                        | Biological process unknown                                        | -                                    | No                       |
| FLCN        | 201163  | folliculin isoform 1                                                         | NP_659434.2       | 1          | 1                 | 1          | 1      | 1.15                                                     | 0.61                                                     |                                                                                        |                                                                                        |                                                                                               |                                                                                               | 1                                                                              | 1                                                                              | 6278    | 201163         | folliculin                                                                 | Molecular function unknown                                              | Cytoplasm                            | Unclassified                        | Biological process unknown                                        | CC                                   | No                       |
| STX18       | 53407   | syntaxin-18                                                                  | NP_058626.1       | 1          | 1                 | 1          | 2      | 1.15                                                     | 0.56                                                     | 16.94                                                                                  | 25.72                                                                                  | 28                                                                                            | 20.7                                                                                          | 2                                                                              | 2                                                                              | 6923    | 53407          | syntaxin 18                                                                | Auxiliary transport protein activity                                    | Endoplasmic reticulum                | Membrane transport protein          | Transport                                                         | CC;TM                                | Yes                      |
| TBC1D22A    | 25771   | TBC1 domain family member 22A isoform a                                      | NP_055161.1       | 3          | 1                 | 1          | 2      | 1.15                                                     | 0.55                                                     |                                                                                        |                                                                                        |                                                                                               |                                                                                               | 1                                                                              | 1                                                                              | 15474   | 25771          | TBC1 domain family, member 22A                                             | GTPase activator activity                                               | Nucleus                              | GTPase activating protein           | Cell communication; Signal transduction                           | TBC                                  | Yes                      |
| IL18        | 3606    | interleukin-18 isoform 1 proprotein                                          | NP_001553.1       | 2          | 5                 | 5          | 6      | 1.15                                                     | 0.53                                                     | 11.07                                                                                  | 27.59                                                                                  | 25.8                                                                                          | 29.8                                                                                          | 4                                                                              | 4                                                                              | 2976    | 3606           | interleukin 18 (interferon-gamma inducing factor)                          | Cytokine activity                                                       | Extracellular                        | Cytokine                            | Immune response                                                   | -                                    | Yes                      |
| GSTO1       | 9446    | glutathione S-transferase omega-1 isoform 1                                  | NP_004823.1       | 3          | 9                 | 9          | 28     | 1.14                                                     | 1.87                                                     | 3.87                                                                                   | 2.09                                                                                   | 15.4                                                                                          | 13.6                                                                                          | 12                                                                             | 12                                                                             | 10401   | 9446           | glutathione S-transferase omega 1                                          | Glutathione transferase activity                                        | Nucleus                              | Enzyme; Glutathione transferase     | Metabolism; Energy pathways                                       | -                                    | Yes                      |
| MADD        | 8567    | MAP kinase-activating death domain protein isoform d                         | NP_003673.3       | 10         | 3                 | 3          | 4      | 1.14                                                     | 1.81                                                     | 37.2                                                                                   | 33.64                                                                                  | 65.8                                                                                          | 104.9                                                                                         | 2                                                                              | 2                                                                              | 4664    | 8567           | MAP-kinase activating death domain                                         | Kinase regulator activity; Receptor signaling complex scaffold activity | Plasma membrane                      | Adapter molecule                    | Anti-apoptosis; Cell communication; Signal transduction           | NLS                                  | Yes                      |
| DUSP12      | 11266   | dual specificity protein phosphatase 12                                      | NP_009171.1       | 1          | 1                 | 1          | 2      | 1.14                                                     | 1.64                                                     |                                                                                        |                                                                                        |                                                                                               |                                                                                               | 1                                                                              | 1                                                                              | 5323    | 11266          | dual specificity phosphatase 12                                            | Protein tyrosine/serine/threonine phosphatase activity                  | Nucleus                              | Dual specificity phosphatase        | Cell communication; Signal transduction                           | DSPC                                 | Yes                      |
| NRBP1       | 29959   | nuclear receptor-binding protein                                             | NP_037524.1       | 1          | 6                 | 6          | 14     | 1.14                                                     | 1.59                                                     | 1.03                                                                                   | 9.23                                                                                   | 3.1                                                                                           | 40.3                                                                                          | 7                                                                              | 7                                                                              | 5819    | 29959          | nuclear receptor binding protein                                           | Receptor signaling complex scaffold activity                            | Nucleus                              | Adapter molecule                    | Cell communication; Signal transduction                           | S;T;Y_Kinase;NLS                     | No                       |
| RNH1        | 6050    | ribonuclease inhibitor                                                       | NP_002930.2       | 1          | 23                | 23         | 107    | 1.14                                                     | 1.55                                                     | 3.01                                                                                   | 3.77                                                                                   | 25.5                                                                                          | 45.1                                                                                          | 54                                                                             | 54                                                                             | 1412    | 6050           | ribonuclease/angiogenesis inhibitor 1                                      | Translation regulator activity                                          | Cytoplasm                            | Translation regulatory protein      | Regulation of nucleobase, nucleoside, and nucleic acid metabolism | LRR                                  | Yes                      |
| ANXA6       | 309     | annexin A6 isoform 1                                                         | NP_001146.2       | 2          | 50                | 50         | 221    | 1.14                                                     | 1.53                                                     | 2.65                                                                                   | 3.15                                                                                   | 33.3                                                                                          | 55                                                                                            | 114                                                                            | 114                                                                            | 231     | 309            | annexin A6                                                                 | Calcium ion binding                                                     | Endoplasmic reticulum                | Calcium binding protein             | Cell communication; Signal transduction                           | ANX                                  | Yes                      |
| RARS2       | 57038   | probable arginine-tRNA ligase, mitochondrial precursor                       | NP_064716.2       | 1          | 2                 | 2          | 3      | 1.14                                                     | 1.48                                                     | 7.35                                                                                   | 24.05                                                                                  | 11.9                                                                                          | 53.8                                                                                          | 2                                                                              | 2                                                                              | 15209   | 57038          | arginyl-tRNA synthetase-like                                               | Catalytic activity                                                      | -                                    | Enzyme; Synthase                    | Metabolism; Energy pathways                                       | -                                    | No                       |
| F8A1        | 8263    | factor VIII intron 22 protein                                                | NP_036283.2       | 1          | 1                 | 1          | 2      | 1.14                                                     | 1.42                                                     |                                                                                        |                                                                                        |                                                                                               |                                                                                               | 1                                                                              | 1                                                                              | 2374    | 8263           | coagulation factor VIII-associated (intron) transcript 1                   | Chaperone activity                                                      | Cytoplasm                            | Chaperone                           | Protein metabolism                                                | -                                    | Yes                      |
| AGRN        | 375790  | agrin isoform 2 precursor                                                    | NP_940978.2       | 2          | 30                | 30         | 57     | 1.14                                                     | 1.41                                                     | 3.27                                                                                   | 4.16                                                                                   | 20.3                                                                                          | 32.4                                                                                          | 29                                                                             | 29                                                                             | 10550   | 375790         | agrin                                                                      | Extracellular matrix structural constituent                             | Extracellular                        | Extracellular matrix protein        | Cell growth and/or maintenance                                    | KAZAL;EGFLA;MEGF;SEA;EGFCA;LAMG;FOLN | Yes                      |
| VCP         | 7415    | transitional endoplasmic reticulum ATPase                                    | NP_009057.1       | 2          | 52                | 52         | 337    | 1.14                                                     | 1.38                                                     | 2.38                                                                                   | 2.78                                                                                   | 36                                                                                            | 53                                                                                            | 166                                                                            | 167                                                                            | 3013    | 7415           | valosin-containing protein                                                 | ATPase activity                                                         | Cytoplasm;Nucleus;Perinuclear region | ATPase                              | Metabolism; Energy pathways                                       | AAA                                  | Yes                      |
| PAFAH1B2    | 5049    | platelet-activating factor acetylhydrolase IB subunit beta isoform a         | NP_002563.1       | 4          | 2                 | 2          | 16     | 1.14                                                     | 1.36                                                     | 3.77                                                                                   | 6.52                                                                                   | 11.4                                                                                          | 23.8                                                                                          | 7                                                                              | 7                                                                              | 3940    | 5049           | platelet-activating factor acetylhydrolase, isoform Ib, beta subunit 30kDa | Hydrolase activity                                                      | Cytoplasm                            | Enzyme; Hydrolase                   | Cell communication; Signal transduction                           | -                                    | No                       |
| STRN4       | 29888   | striatin-4 isoform 2                                                         | NP_001034966.1    | 2          | 6                 | 6          | 10     | 1.14                                                     | 1.35                                                     | 10.88                                                                                  | 8.52                                                                                   | 28.4                                                                                          | 26.2                                                                                          | 5                                                                              | 5                                                                              | 18125   | 29888          | striatin, calmodulin binding protein 4                                     | Molecular function unknown                                              | Cytoplasm                            | Unclassified                        | Cell communication; Signal transduction                           | CC;WD40                              | Yes                      |
| IPO11       | 51194   | importin-11 isoform 1                                                        | NP_001128251.1    | 2          | 6                 | 6          | 10     | 1.14                                                     | 1.34                                                     | 11.49                                                                                  | 8.21                                                                                   | 26.7                                                                                          | 22.4                                                                                          | 4                                                                              | 4                                                                              | 10003   | 51194          | importin 11                                                                | Transporter activity                                                    | Nucleus                              | Transport/cargo protein             | Cell communication; Signal transduction                           | IBN_NT                               | Yes                      |
| DHX16       | 8449    | putative pre-mRNA-splicing factor ATP-dependent RNA helicase DHX16 isoform 1 | NP_003578.2       | 2          | 6                 | 6          | 15     | 1.14                                                     | 1.31                                                     | 6.35                                                                                   | 6                                                                                      | 20.7                                                                                          | 22.6                                                                                          | 8                                                                              | 8                                                                              | 4555    | 8449           | DEAH (Asp-Glu-Asp-His) box polypeptide 16                                  | ATPase activity                                                         | Nucleus                              | ATPase                              | Regulation of nucleobase, nucleoside, and nucleic acid metabolism | HELIC;DEXD;C                         | Yes                      |
| AHSA1       | 10598   | activator of 90 kDa heat shock protein ATPase homolog 1                      | NP_036243.1       | 1          | 12                | 12         | 38     | 1.14                                                     | 1.29                                                     | 3.08                                                                                   | 5.05                                                                                   | 16.1                                                                                          | 30.6                                                                                          | 21                                                                             | 21                                                                             | 9768    | 10598          | AHA1, activator of heat shock 90kDa proteinATPase homolog 1 (yeast)        | Molecular function unknown                                              | Cytoplasm                            | Unclassified                        | Biological process unknown                                        | -                                    | Yes                      |
| MRPL14      | 64928   | 39S ribosomal protein L14, mitochondrial                                     | NP_115487.2       | 1          | 4                 | 4          | 13     | 1.14                                                     | 1.28                                                     | 2.65                                                                                   | 6.11                                                                                   | 7.4                                                                                           | 19.3                                                                                          | 6                                                                              | 6                                                                              | 14741   | 64928          | mitochondrial ribosomal protein L14                                        | Structural constituent of ribosome                                      | Mitochondrion                        | Ribosomal subunit                   | Protein metabolism                                                | -                                    | No                       |
| RAVER1      | 125950  | ribonucleoprotein PTB-binding 1                                              | NP_597709.2       | 1          | 11                | 11         | 30     | 1.14                                                     | 1.28                                                     | 4.63                                                                                   | 6.55                                                                                   | 20.7                                                                                          | 33.5                                                                                          | 15                                                                             | 15                                                                             | 11484   | 125950         | None                                                                       | Cytoskeletal protein binding                                            | Nucleus                              | Cytoskeletal associated protein     | Biological process unknown                                        | RRM                                  | No                       |

Supplementary Table S1. List of quantified proteins in OKF6/TERT1-Smoke cells  
 Raingopaln *et al.*, 2017. Role of protein kinase N2 (PKN2) in cigarette smoke-mediated oncogenic transformation of oral cells

| Gene Symbol | Gene ID | Protein Description                                    | Protein Accession | # Proteins | # Unique Peptides | # Peptides | # PSMs | OKF6/TERT1-Smoke/<br>OKF6/TERT1-Parental<br>(130/126) R1 | OKF6/TERT1-Smoke/<br>OKF6/TERT1-Parental<br>(128/127) R2 | Ratio Standard Errors [%]:<br>OKF6/TERT1-Smoke/<br>OKF6/TERT1-Parental<br>(130/126) R1 | Ratio Standard Errors [%]:<br>OKF6/TERT1-Smoke/<br>OKF6/TERT1-Parental<br>(128/127) R2 | Ratio Variabilities [%]:<br>F13: OKF6/TERT1-<br>Smoke/<br>OKF6/TERT1-Parental<br>(130/126) R1 | Ratio Variabilities [%]:<br>F13: OKF6/TERT1-<br>Smoke/<br>OKF6/TERT1-Parental<br>(128/127) R2 | Ratio Counts: F13:<br>OKF6/TERT1-Smoke/<br>OKF6/TERT1-Parental<br>(130/126) R1 | Ratio Counts: F13:<br>OKF6/TERT1-Smoke/<br>OKF6/TERT1-Parental<br>(128/127) R2 | HPRD ID | Entrez Gene ID | Gene Name                                                                            | Molecular Function                           | Primary Localization | Molecular Class                  | Biological Process                                                           | Domains               | Plasma Proteome Database |
|-------------|---------|--------------------------------------------------------|-------------------|------------|-------------------|------------|--------|----------------------------------------------------------|----------------------------------------------------------|----------------------------------------------------------------------------------------|----------------------------------------------------------------------------------------|-----------------------------------------------------------------------------------------------|-----------------------------------------------------------------------------------------------|--------------------------------------------------------------------------------|--------------------------------------------------------------------------------|---------|----------------|--------------------------------------------------------------------------------------|----------------------------------------------|----------------------|----------------------------------|------------------------------------------------------------------------------|-----------------------|--------------------------|
| RRP1        | 8568    | ribosomal RNA processing protein 1 homolog A           | NP_003674.1       | 1          | 5                 | 5          | 10     | 1.14                                                     | 1.27                                                     | 2.5                                                                                    | 2.41                                                                                   | 6.3                                                                                           | 6.8                                                                                           | 5                                                                              | 5                                                                              | 10857   | 8568           | None                                                                                 | Molecular function unknown                   | Nucleolus            | Unclassified                     | Regulation of nucleobase, nucleoside, nucleotide and nucleic acid metabolism | -                     | No                       |
| SERPIN8     | 5271    | serpin B8 isoform a                                    | NP_002631.3       | 5          | 2                 | 4          | 11     | 1.14                                                     | 1.27                                                     | 4.57                                                                                   | 4.1                                                                                    | 10.4                                                                                          | 10.4                                                                                          | 4                                                                              | 4                                                                              | 3412    | 5271           | serine (or cysteine) proteinase inhibitor, clade B (ovalbumin), member 8             | Protease inhibitor activity                  | Nucleus              | Protease inhibitor               | Protein metabolism                                                           | SERPIN                | Yes                      |
| RUVBL2      | 10856   | rvbB-like 2                                            | NP_006657.1       | 1          | 28                | 28         | 107    | 1.14                                                     | 1.26                                                     | 3.39                                                                                   | 3.14                                                                                   | 29                                                                                            | 29.6                                                                                          | 54                                                                             | 54                                                                             | 16070   | 10856          | RuvB-like 2 (E. coli)                                                                | Transcription regulator activity             | Nucleus              | Transcription regulatory protein | Regulation of nucleobase, nucleoside, nucleotide and nucleic acid metabolism | AAA                   | Yes                      |
| PATL1       | 219988  | protein PAT1 homolog 1                                 | NP_689929.2       | 1          | 4                 | 4          | 9      | 1.14                                                     | 1.23                                                     | 24.27                                                                                  | 11.21                                                                                  | 68                                                                                            | 31.5                                                                                          | 5                                                                              | 5                                                                              | 8214    | 219988         | None                                                                                 | Molecular function unknown                   | Nucleus/Cytoplasm    | Unclassified                     | Biological process unknown                                                   | -                     | Yes                      |
| GMPPA       | 29926   | mannose-1-phosphate guanylyltransferase alpha          | NP_995319.1       | 1          | 8                 | 8          | 15     | 1.14                                                     | 1.22                                                     | 0.92                                                                                   | 4.39                                                                                   | 2.6                                                                                           | 13.2                                                                                          | 6                                                                              | 6                                                                              | 13588   | 29926          | GDP-mannose pyrophosphorylase A                                                      | Phosphorylase activity                       | -                    | Enzyme: Phosphorylase            | Carbohydrate mediated signaling/Metabolism                                   | -                     | No                       |
| KRR1        | 11103   | KRR1 small subunit processome component homolog        | NP_008974.5       | 1          | 5                 | 5          | 13     | 1.14                                                     | 1.22                                                     | 11.51                                                                                  | 2.49                                                                                   | 33.1                                                                                          | 7.5                                                                                           | 6                                                                              | 6                                                                              | 11027   | 11103          | HIV-1 rev binding protein 2                                                          | DNA binding                                  | Nucleolus            | DNA binding protein              | Regulation of nucleobase, nucleoside, nucleotide and nucleic acid metabolism | KH                    | Yes                      |
| KRI1        | 65095   | protein KRI1 homolog                                   | NP_075384.3       | 1          | 4                 | 4          | 10     | 1.14                                                     | 1.2                                                      | 3.12                                                                                   | 6.2                                                                                    | 8.7                                                                                           | 18.4                                                                                          | 6                                                                              | 6                                                                              | 10969   | 65095          | None                                                                                 | Molecular function unknown                   | Nucleus/Cytoplasm    | Unclassified                     | Biological process unknown                                                   | CC                    | No                       |
| SKIV2L2     | 23517   | superkiller viralicidic activity 2-like 2              | NP_056175.3       | 1          | 23                | 23         | 49     | 1.14                                                     | 1.19                                                     | 2.12                                                                                   | 3.35                                                                                   | 12.6                                                                                          | 20.9                                                                                          | 27                                                                             | 27                                                                             | 13777   | 23517          | superkiller viralicidic activity 2-like 2 (S.cerevisiae)                             | Helicase activity                            | Nucleus              | RNA helicase                     | Regulation of nucleobase, nucleoside, nucleotide and nucleic acid metabolism | DEXDc,HELICc,CC       | Yes                      |
| DNTS8       | 55656   | integrator complex subunit 8                           | NP_060334.2       | 1          | 2                 | 2          | 4      | 1.14                                                     | 1.18                                                     | 38.15                                                                                  | 8.19                                                                                   | 67.8                                                                                          | 13.7                                                                                          | 2                                                                              | 2                                                                              | 8626    | 55656          | None                                                                                 | Molecular function unknown                   | -                    | Unclassified                     | Biological process unknown                                                   | -                     | No                       |
| NOPI4       | 8602    | nucleolar protein 14 isoform 1                         | NP_001278907.1    | 2          | 7                 | 7          | 15     | 1.14                                                     | 1.18                                                     | 13.44                                                                                  | 9.45                                                                                   | 38.7                                                                                          | 27.9                                                                                          | 6                                                                              | 6                                                                              | 12827   | 8602           | chromosome 4 open reading frame 9                                                    | Molecular function unknown                   | Nucleus              | Unclassified                     | Biological process unknown                                                   | -                     | Yes                      |
| SFPQ        | 6421    | splicing factor, proline- and glutamine-rich           | NP_005057.1       | 1          | 21                | 22         | 67     | 1.14                                                     | 1.17                                                     | 4.15                                                                                   | 2.61                                                                                   | 26.3                                                                                          | 16.9                                                                                          | 30                                                                             | 30                                                                             | 7284    | 6421           | splicing factor proline/ glutamine rich/ pyrimidine tract binding protein associated | RNA binding                                  | Nucleus              | RNA binding protein              | Regulation of nucleobase, nucleoside, nucleotide and nucleic acid metabolism | RRM;CC                | Yes                      |
| STK10       | 6793    | serine/threonine-protein kinase 10                     | NP_005981.3       | 1          | 16                | 17         | 46     | 1.14                                                     | 1.17                                                     | 3.19                                                                                   | 6.14                                                                                   | 16.4                                                                                          | 33.1                                                                                          | 20                                                                             | 20                                                                             | 6796    | 6793           | serine/threonine kinase 10                                                           | Protein serine/threonine kinase activity     | -                    | Serine/threonine kinase          | Cell communication/Signal transduction                                       | S_T_kinase;CC         | Yes                      |
| TRIM21      | 6737    | E3 ubiquitin-protein ligase TRIM21                     | NP_003132.2       | 1          | 12                | 12         | 15     | 1.14                                                     | 1.16                                                     | 2.95                                                                                   | 17.27                                                                                  | 9.6                                                                                           | 61.7                                                                                          | 8                                                                              | 8                                                                              | 170     | 6737           | tripartite motif-containing 21                                                       | Ribonucleoprotein                            | Plasma membrane      | Ribonucleoprotein                | Regulation of nucleobase, nucleoside, nucleotide and nucleic acid metabolism | RING;SPRY;PRY;BBOX;CC | Yes                      |
| SYAP1       | 94056   | synapse-associated protein 1                           | NP_116185.2       | 1          | 5                 | 5          | 8      | 1.14                                                     | 1.16                                                     | 3.42                                                                                   | 1.86                                                                                   | 7.8                                                                                           | 4.3                                                                                           | 4                                                                              | 4                                                                              | 6733    | 94056          | synapse associated protein 1, SAP47 homolog (Drosophila)                             | Transporter activity                         | Nucleus/Cytoplasm    | Transport/cargo protein          | Cell communication/Signal transduction                                       | CC                    | No                       |
| RPL29       | 6159    | 60S ribosomal protein L29                              | NP_000983.1       | 1          | 2                 | 2          | 10     | 1.14                                                     | 1.16                                                     | 3                                                                                      | 1.3                                                                                    | 7.6                                                                                           | 3.3                                                                                           | 5                                                                              | 5                                                                              | 3495    | 6159           | ribosomal protein L29                                                                | Structural constituent of ribosome           | Plasma membrane      | Ribosomal subunit                | Protein metabolism                                                           | -                     | Yes                      |
| SRP14       | 6727    | signal recognition particle 14 kDa protein             | NP_003125.3       | 1          | 7                 | 7          | 21     | 1.14                                                     | 1.15                                                     | 9.89                                                                                   | 2.2                                                                                    | 32.9                                                                                          | 7.2                                                                                           | 8                                                                              | 8                                                                              | 2831    | 6727           | signal recognition particle 14kDa (homologous/Ala RNA binding protein)               | RNA binding                                  | Cytoplasm            | RNA binding protein              | Protein metabolism                                                           | -                     | Yes                      |
| DNAJC3      | 5611    | dnaJ homolog subfamily C member 3 precursor            | NP_006251.1       | 1          | 10                | 10         | 26     | 1.14                                                     | 1.13                                                     | 1.96                                                                                   | 5.75                                                                                   | 8.1                                                                                           | 23.8                                                                                          | 13                                                                             | 13                                                                             | 3114    | 5611           | DnaJ (Hsp40) homolog, subfamily C, member 3                                          | Translational regulator activity             | Cytoplasm            | Translational regulator protein  | Protein metabolism                                                           | TPR;DNAJ              | No                       |
| OSBPL8      | 114882  | oxysterol-binding protein-related protein 8, isoform a | NP_065892.1       | 2          | 7                 | 8          | 18     | 1.14                                                     | 1.13                                                     | 7.37                                                                                   | 3.16                                                                                   | 25.7                                                                                          | 10.8                                                                                          | 9                                                                              | 9                                                                              | 9478    | 114882         | oxysterol binding protein-like 8                                                     | Transporter activity                         | Mitochondrion        | Transport/cargo protein          | Transport                                                                    | PH;CC;TM              | Yes                      |
| PHACTR4     | 65979   | phosphatase and actin regulator 4 isoform 2            | NP_076412.3       | 2          | 3                 | 3          | 4      | 1.14                                                     | 1.11                                                     | 3.84                                                                                   | 18.83                                                                                  | 6.2                                                                                           | 30.1                                                                                          | 2                                                                              | 2                                                                              | 7816    | 65979          | phosphatase and actin regulator 4                                                    | Phosphatase-regulator activity               | Perinuclear region   | Regulatory/other subunit         | Signal transduction                                                          | -                     | No                       |
| PA2G4       | 5036    | proliferation-associated protein 2G4                   | NP_006182.2       | 1          | 23                | 23         | 110    | 1.14                                                     | 1.11                                                     | 4.4                                                                                    | 5.48                                                                                   | 39.9                                                                                          | 49.3                                                                                          | 59                                                                             | 59                                                                             | 3685    | 5036           | proliferation-associated 2G4, 38kDa                                                  | Transcription regulator activity;DNA binding | Nucleus              | Transcription regulatory protein | Regulation of nucleobase, nucleoside, nucleotide and nucleic acid metabolism | -                     | Yes                      |
| STK38L      | 23012   | serine/threonine-protein kinase 38-like                | NP_055815.1       | 1          | 3                 | 3          | 5      | 1.14                                                     | 1.09                                                     | 3.8                                                                                    | 0.37                                                                                   | 7.5                                                                                           | 0.7                                                                                           | 3                                                                              | 3                                                                              | 10256   | 23012          | serine/threonine kinase 38 like                                                      | Protein serine/threonine kinase activity     | -                    | Serine/threonine kinase          | Cell communication/Signal transduction                                       | S_T_kinase            | Yes                      |
| C7orf50     | 84310   | uncharacterized protein C7orf50                        | NP_115726.1       | 1          | 5                 | 5          | 7      | 1.14                                                     | 1.09                                                     | 11.32                                                                                  | 5.51                                                                                   | 26.3                                                                                          | 12                                                                                            | 4                                                                              | 4                                                                              | 14413   | 84310          | None                                                                                 | Molecular function unknown                   | Nucleus              | Unclassified                     | Biological process unknown                                                   | -                     | No                       |
| RBM12B      | 389677  | RNA-binding protein 12B                                | NP_976324.2       | 1          | 8                 | 8          | 10     | 1.14                                                     | 1.07                                                     | 6.13                                                                                   | 5.15                                                                                   | 20                                                                                            | 15.6                                                                                          | 8                                                                              | 8                                                                              | 14213   | 389677         | None                                                                                 | Molecular function unknown                   | Nucleus/Cytoplasm    | Unclassified                     | Regulation of nucleobase, nucleoside, nucleotide and nucleic acid metabolism | RRM                   | Yes                      |
| CYCS        | 54205   | cytochrome c                                           | NP_061820.1       | 1          | 4                 | 4          | 15     | 1.14                                                     | 1.06                                                     | 8                                                                                      | 6.32                                                                                   | 26.3                                                                                          | 19                                                                                            | 8                                                                              | 8                                                                              | 479     | 54205          | cytochrome c, somatic                                                                | Catalytic activity                           | Mitochondrion        | Enzyme: Oxidase                  | Metabolism/Energy pathways                                                   | -                     | Yes                      |
| ADSS        | 159     | adenylosuccinate synthetase isozyme 2                  | NP_001117.2       | 1          | 12                | 14         | 45     | 1.14                                                     | 1.05                                                     | 2.03                                                                                   | 5.31                                                                                   | 11.3                                                                                          | 27.9                                                                                          | 24                                                                             | 24                                                                             | 50      | 159            | adenylosuccinate synthase                                                            | Ligase activity                              | Cytoplasm            | Enzyme: Synthase                 | Metabolism/Energy pathways                                                   | -                     | Yes                      |





Supplementary Table S1. List of quantified proteins in OKF6/TERT1-Smoke cells  
 Raigopaln *et al.*, 2017. Role of protein kinase N2 (PKN2) in cigarette smoke-mediated oncogenic transformation of oral cells

| Gene Symbol | Gene ID | Protein Description                                                                       | Protein Accession | # Proteins | # Unique Peptides | # Peptides | # PSMs | OKF6/TERT1-Smoke/<br>OKF6/TERT1-Parental<br>(130/126) R1 | OKF6/TERT1-Smoke/<br>OKF6/TERT1-Parental<br>(128/127) R2 | Ratio Standard Errors [%]:<br>OKF6/TERT1-Smoke/<br>OKF6/TERT1-Parental<br>(130/126) R1 | Ratio Standard Errors [%]:<br>OKF6/TERT1-Smoke/<br>OKF6/TERT1-Parental<br>(128/127) R2 | Ratio Variabilities [%]:<br>F13: OKF6/TERT1-<br>Smoke/<br>OKF6/TERT1-Parental<br>(130/126) R1 | Ratio Variabilities [%]:<br>F13: OKF6/TERT1-<br>Smoke/<br>OKF6/TERT1-Parental<br>(128/127) R2 | Ratio Counts: F13:<br>OKF6/TERT1-Smoke/<br>OKF6/TERT1-Parental<br>(130/126) R1 | Ratio Counts: F13:<br>OKF6/TERT1-Smoke/<br>OKF6/TERT1-Parental<br>(128/127) R2 | HPRD ID | Entrez Gene Id | Gene Name                                                                                                               | Molecular Function                       | Primary Localization  | Molecular Class                     | Biological Process                                               | Domains                            | Plasma Proteome Database |
|-------------|---------|-------------------------------------------------------------------------------------------|-------------------|------------|-------------------|------------|--------|----------------------------------------------------------|----------------------------------------------------------|----------------------------------------------------------------------------------------|----------------------------------------------------------------------------------------|-----------------------------------------------------------------------------------------------|-----------------------------------------------------------------------------------------------|--------------------------------------------------------------------------------|--------------------------------------------------------------------------------|---------|----------------|-------------------------------------------------------------------------------------------------------------------------|------------------------------------------|-----------------------|-------------------------------------|------------------------------------------------------------------|------------------------------------|--------------------------|
| SRRM1       | 10250   | serine/arginine repetitive matrix protein 1 isoform 1                                     | NP_001290377.1    | 3          | 8                 | 8          | 27     | 1.13                                                     | 1.21                                                     | 12.55                                                                                  | 12.03                                                                                  | 49.9                                                                                          | 51.4                                                                                          | 11                                                                             | 11                                                                             | 10441   | 10250          | serine/arginine repetitive matrix 1                                                                                     | Ribonuclease activity                    | Nucleus               | Ribonuclease                        | Regulation of nucleobase, nucleotide and nucleic acid metabolism | PWI                                | Yes                      |
| DDX10       | 1662    | probable ATP-dependent RNA helicase DDX10                                                 | NP_004389.2       | 1          | 3                 | 3          | 9      | 1.13                                                     | 1.21                                                     | 5.96                                                                                   | 7.12                                                                                   | 15.1                                                                                          | 19.4                                                                                          | 5                                                                              | 5                                                                              | 3138    | 1662           | DEAD (Asp-Glu-Ala-Asp) box polypeptide 10                                                                               | RNA binding                              | Nucleus               | RNA binding protein                 | Regulation of nucleobase, nucleotide and nucleic acid metabolism | HELIC;DEXDC;C                      | Yes                      |
| MAN2B1      | 4125    | lysosomal alpha-mannosidase isoform 1 precursor                                           | NP_000519.2       | 2          | 6                 | 6          | 17     | 1.13                                                     | 1.2                                                      | 3.15                                                                                   | 13.32                                                                                  | 10.7                                                                                          | 50.8                                                                                          | 9                                                                              | 9                                                                              | 2007    | 4125           | mannosidase, alpha, class 2B, member 1                                                                                  | Catalytic activity                       | Lysosome              | Enzyme: Glycosidase                 | Metabolism;Energy pathways                                       | -                                  | Yes                      |
| LRRFIP1     | 9208    | leucine-rich repeat flightless-interacting protein 1 isoform 4                            | NP_004726.2       | 5          | 21                | 21         | 85     | 1.13                                                     | 1.19                                                     | 4.06                                                                                   | 4.72                                                                                   | 30.4                                                                                          | 37.6                                                                                          | 42                                                                             | 42                                                                             | 4460    | 9208           | leucine rich repeat (in FLII) interacting protein 1                                                                     | Transcription regulator activity         | Cytoplasm             | Transcription regulatory protein    | Regulation of nucleobase, nucleotide and nucleic acid metabolism | CC                                 | Yes                      |
| UTP18       | 51096   | U3 small nuclear RNA-associated protein 18 homolog                                        | NP_057085.2       | 1          | 10                | 10         | 18     | 1.13                                                     | 1.18                                                     | 5.1                                                                                    | 5.68                                                                                   | 21                                                                                            | 24.4                                                                                          | 13                                                                             | 13                                                                             | 10825   | 51096          | WD repeat domain 50                                                                                                     | Molecular function unknown               | Nucleolus             | Unclassified                        | Regulation of nucleobase, nucleotide and nucleic acid metabolism | WD40                               | Yes                      |
| SLC44A1     | 23446   | choline transporter-like protein 1 isoform a                                              | NP_536856.2       | 2          | 1                 | 1          | 2      | 1.13                                                     | 1.17                                                     |                                                                                        |                                                                                        |                                                                                               |                                                                                               | 1                                                                              | 1                                                                              | 16197   | 23446          | CDW92 antigen                                                                                                           | Molecular function unknown               | Integral to membrane  | Integral membrane protein           | Transport                                                        | TM                                 | No                       |
| TDP1        | 55775   | tyrosyl-DNA phosphodiesterase 1                                                           | NP_060789.2       | 1          | 1                 | 1          | 4      | 1.13                                                     | 1.17                                                     | 10.51                                                                                  | 23.73                                                                                  | 16.9                                                                                          | 40.7                                                                                          | 2                                                                              | 2                                                                              | 6226    | 55775          | tyrosyl-DNA phosphodiesterase 1                                                                                         | Phosphoric diester hydrolase activity    | Nucleus               | Enzyme: Phosphodiesterase           | DNA repair                                                       | HKD                                | Yes                      |
| SQLE        | 6713    | squalene monooxygenase                                                                    | NP_003120.2       | 1          | 7                 | 7          | 17     | 1.13                                                     | 1.16                                                     | 4.43                                                                                   | 6.35                                                                                   | 14.3                                                                                          | 21.1                                                                                          | 8                                                                              | 8                                                                              | 11802   | 6713           | squalene epoxidase                                                                                                      | Catalytic activity                       | Endoplasmic reticulum | Enzyme: Oxygenase                   | Metabolism;Energy pathways                                       | TM                                 | Yes                      |
| POLDIP2     | 26073   | polymerase delta-interacting protein 2 isoform 1                                          | NP_056399.1       | 2          | 7                 | 7          | 11     | 1.13                                                     | 1.14                                                     | 9.62                                                                                   | 8.61                                                                                   | 31.6                                                                                          | 28.3                                                                                          | 8                                                                              | 8                                                                              | 17874   | 26073          | polymerase (DNA-directed), delta interacting protein 2                                                                  | Molecular function unknown               | Nucleus               | Unclassified                        | Biological process unknown                                       | -                                  | Yes                      |
| DPH2        | 1802    | diphthamide biosynthesis protein 2 isoform a                                              | NP_001375.2       | 2          | 2                 | 2          | 7      | 1.13                                                     | 1.13                                                     | 12.68                                                                                  | 36.05                                                                                  | 25.3                                                                                          | 80.6                                                                                          | 3                                                                              | 3                                                                              | 16023   | 1802           | DPH2 homolog (S. cerevisiae)                                                                                            | Catalytic activity                       | -                     | Enzyme: Adenylyltransferase         | Metabolism;Energy pathways                                       | -                                  | No                       |
| QSOX1       | 5768    | sulphydryl oxidase 1 isoform a precursor                                                  | NP_002817.2       | 2          | 1                 | 1          | 1      | 1.13                                                     | 1.1                                                      |                                                                                        |                                                                                        |                                                                                               |                                                                                               | 1                                                                              | 1                                                                              | 6785    | 5768           | quiescin Q6                                                                                                             | Molecular function unknown               | Extracellular         | Cell cycle control protein          | Regulation of cell cycle                                         | TM;SP                              | Yes                      |
| RPL34       | 6164    | 60S ribosomal protein L34                                                                 | NP_000986.2       | 1          | 6                 | 6          | 17     | 1.13                                                     | 1.09                                                     | 7.72                                                                                   | 2.99                                                                                   | 25.1                                                                                          | 9.2                                                                                           | 8                                                                              | 8                                                                              | 17996   | 6164           | ribosomal protein L34                                                                                                   | Structural constituent of ribosome       | Ribosome              | Ribosomal subunit                   | Protein metabolism                                               | -                                  | Yes                      |
| GOT1        | 2805    | aspartate aminotransferase, cytoplasmic                                                   | NP_002070.1       | 1          | 20                | 20         | 71     | 1.13                                                     | 1.09                                                     | 3.18                                                                                   | 5.19                                                                                   | 21.6                                                                                          | 34.5                                                                                          | 35                                                                             | 35                                                                             | 687     | 2805           | glutamic-oxaloacetic transaminase 1, soluble(aspartate aminotransferase 1)                                              | Transaminase activity                    | Cytoplasm             | Enzyme: Aminotransferase            | Metabolism;Energy pathways                                       | -                                  | Yes                      |
| CYP4F11     | 57834   | phyloquinone omega-hydroxylase CYP4F11 precursor                                          | NP_067010.3       | 5          | 4                 | 4          | 6      | 1.13                                                     | 1.09                                                     | 6.25                                                                                   | 15.28                                                                                  | 14.2                                                                                          | 34.4                                                                                          | 4                                                                              | 4                                                                              | 7101    | 57834          | cytochrome P450, family 4, subfamily F, polypeptide 11                                                                  | Catalytic activity                       | Endoplasmic reticulum | Enzyme: Oxygenase                   | Metabolism;Energy pathways                                       | TM                                 | Yes                      |
| ADNP        | 23394   | activity-dependent neuroprotector homeobox protein                                        | NP_001269460.1    | 1          | 5                 | 5          | 11     | 1.13                                                     | 1.08                                                     | 2.82                                                                                   | 0.54                                                                                   | 7.2                                                                                           | 1.3                                                                                           | 5                                                                              | 5                                                                              | 9793    | 23394          | activity-dependent neuroprotector                                                                                       | Transcription factor activity            | Nucleus               | Transcription factor                | Regulation of nucleobase, nucleotide and nucleic acid metabolism | ZNFC2;HOX;NLS                      | Yes                      |
| TRMT1       | 55621   | tRNA (guanine(26)-N(2)-dimethyltransferase isoform 1                                      | NP_001129507.1    | 2          | 13                | 13         | 18     | 1.13                                                     | 1.07                                                     | 4.64                                                                                   | 0.93                                                                                   | 14.9                                                                                          | 2.8                                                                                           | 8                                                                              | 8                                                                              | 8617    | 55621          | None                                                                                                                    | RNA methyltransferase activity           | -                     | RNA methyltransferase               | Regulation of nucleobase, nucleotide and nucleic acid metabolism | ZnF_C3H1;SP                        | Yes                      |
| DBN1        | 1627    | drebrin isoform b                                                                         | NP_543157.1       | 2          | 15                | 15         | 56     | 1.13                                                     | 1.07                                                     | 4.41                                                                                   | 5.23                                                                                   | 25.4                                                                                          | 28.6                                                                                          | 25                                                                             | 25                                                                             | 545     | 1627           | drebrin 1                                                                                                               | Cytoskeletal protein binding             | Cytoplasm             | Cytoskeletal associated protein     | Cell growth and/or maintenance                                   | ADF;CC                             | Yes                      |
| LSM8        | 51691   | LSM8 homolog, U6 small nuclear RNA associated                                             | NP_057284.1       | 1          | 1                 | 1          | 2      | 1.13                                                     | 1.07                                                     |                                                                                        |                                                                                        |                                                                                               |                                                                                               | 1                                                                              | 1                                                                              |         |                |                                                                                                                         |                                          |                       |                                     |                                                                  |                                    |                          |
| DEK         | 7913    | protein DEK isoform 1                                                                     | NP_003463.1       | 2          | 7                 | 7          | 30     | 1.13                                                     | 1.06                                                     | 5.04                                                                                   | 6.84                                                                                   | 23                                                                                            | 29.6                                                                                          | 16                                                                             | 16                                                                             | 503     | 7913           | DEK oncogene (DNA binding)                                                                                              | DNA binding                              | Nucleus               | DNA binding protein                 | Regulation of nucleobase, nucleotide and nucleic acid metabolism | SAP;CC                             | Yes                      |
| COIL        | 8161    | coilin                                                                                    | NP_004636.1       | 1          | 2                 | 2          | 8      | 1.13                                                     | 1.06                                                     | 10.64                                                                                  | 19.88                                                                                  | 24.3                                                                                          | 44.2                                                                                          | 4                                                                              | 4                                                                              | 2605    | 8161           | coilin                                                                                                                  | RNA binding                              | Nucleus               | RNA binding protein                 | Regulation of nucleobase, nucleotide and nucleic acid metabolism | -                                  | Yes                      |
| PSMC1       | 5700    | 26S protease regulatory subunit 4                                                         | NP_002793.2       | 1          | 23                | 24         | 76     | 1.13                                                     | 1.04                                                     | 2.3                                                                                    | 3.78                                                                                   | 16.5                                                                                          | 25.2                                                                                          | 40                                                                             | 40                                                                             | 4084    | 5700           | proteasome (prosome, macropain) 26S subunit, ATPase, 1                                                                  | Ubiquitin-specific protease activity     | Cytoplasm             | Ubiquitin proteasome system protein | Protein metabolism                                               | AAA;CC                             | Yes                      |
| CSNK1G3     | 1456    | casein kinase 1 isoform gamma-3 isoform 4                                                 | NP_001038188.1    | 6          | 1                 | 1          | 2      | 1.13                                                     | 1.03                                                     |                                                                                        |                                                                                        |                                                                                               |                                                                                               | 1                                                                              | 1                                                                              | 5034    | 1456           | casein kinase 1, gamma 3                                                                                                | Protein serine/threonine kinase activity | Cytoplasm;Nucleus     | Serine/threonine kinase             | Signal transduction                                              | S,T,Y_Kinase;S,T_kinase;Tyr_Kinase | No                       |
| OGT         | 8473    | UDP-N-acetylglucosamine-peptide N-acetylglucosaminyltransferase 110 kDa subunit isoform 1 | NP_858058.1       | 2          | 16                | 16         | 36     | 1.13                                                     | 1.03                                                     | 3.66                                                                                   | 4.14                                                                                   | 18.1                                                                                          | 18.8                                                                                          | 19                                                                             | 19                                                                             | 2222    | 8473           | O-linked N-acetylglucosamine (GlcNAc) transferase(UDP-N-acetylglucosamine polypeptide N-acetylglucosaminyl transferase) | Transferase activity                     | Nucleus               | Enzyme: Glucosaminyltransferase     | Protein metabolism                                               | TPR                                | Yes                      |

Supplementary Table S1. List of quantified proteins in OKF6/TERT1-Smoke cells  
 Raingonalan *et al.*, 2017. Role of protein kinase N2 (PKN2) in cigarette smoke-mediated oncogenic transformation of oral cells

| Gene Symbol | Gene ID | Protein Description                                              | Protein Accession | # Proteins | # Unique Peptides | # Peptides | # PSMs | OKF6/TERT1-Smoke/<br>OKF6/TERT1-Parental<br>(130/126) R1 | OKF6/TERT1-Smoke/<br>OKF6/TERT1-Parental<br>(128/127) R2 | Ratio Standard Errors [%]:<br>OKF6/TERT1-Smoke/<br>OKF6/TERT1-Parental<br>(130/126) R1 | Ratio Standard Errors [%]:<br>OKF6/TERT1-Smoke/<br>OKF6/TERT1-Parental<br>(128/127) R2 | Ratio Variabilities [%]:<br>F13: OKF6/TERT1-<br>Smoke/<br>OKF6/TERT1-Parental<br>(130/126) R1 | Ratio Variabilities [%]:<br>F13: OKF6/TERT1-<br>Smoke/<br>OKF6/TERT1-Parental<br>(128/127) R2 | Ratio Counts: F13:<br>OKF6/TERT1-Smoke/<br>OKF6/TERT1-Parental<br>(130/126) R1 | Ratio Counts: F13:<br>OKF6/TERT1-Smoke/<br>OKF6/TERT1-Parental<br>(128/127) R2 | HPRD ID | Entrez Gene Id | Gene Name                                                                                         | Molecular Function                                     | Primary Localization              | Molecular Class                  | Biological Process                                               | Domains                 | Plasma Proteome Database |
|-------------|---------|------------------------------------------------------------------|-------------------|------------|-------------------|------------|--------|----------------------------------------------------------|----------------------------------------------------------|----------------------------------------------------------------------------------------|----------------------------------------------------------------------------------------|-----------------------------------------------------------------------------------------------|-----------------------------------------------------------------------------------------------|--------------------------------------------------------------------------------|--------------------------------------------------------------------------------|---------|----------------|---------------------------------------------------------------------------------------------------|--------------------------------------------------------|-----------------------------------|----------------------------------|------------------------------------------------------------------|-------------------------|--------------------------|
| DDX46       | 9879    | probable ATP-dependent RNA helicase DDX46 isoform 1              | NP_001287891.1    | 2          | 17                | 17         | 41     | 1.13                                                     | 1.03                                                     | 2.94                                                                                   | 3.75                                                                                   | 15.7                                                                                          | 18.2                                                                                          | 22                                                                             | 22                                                                             | 10862   | 9879           | DEAD (Asp-Glu-Ala-Asp) box polypeptide 46                                                         | Helicase activity                                      | Nucleus,Cytoplasm                 | RNA helicase                     | Regulation of nucleoside, nucleotide and nucleic acid metabolism | HELIC;CC;DEX<br>De      | Yes                      |
| MTSS1       | 9788    | metastasis suppressor protein 1 isoform 1                        | NP_001269900.1    | 3          | 3                 | 3          | 6      | 1.13                                                     | 1.02                                                     | 9.54                                                                                   | 4.67                                                                                   | 18.8                                                                                          | 8.3                                                                                           | 3                                                                              | 3                                                                              | 12243   | 9788           | metastasis suppressor 1                                                                           | Cytoskeletal protein binding                           | Cytoplasm                         | Cytoskeletal associated protein  | Cell growth and/or maintenance                                   | CC;WH2                  | Yes                      |
| SURF6       | 6838    | surfeit locus protein 6 isoform 1                                | NP_006744.2       | 2          | 2                 | 2          | 3      | 1.13                                                     | 1.02                                                     | 6.41                                                                                   | 12.81                                                                                  | 10.3                                                                                          | 18.6                                                                                          | 2                                                                              | 2                                                                              | 1714    | 6838           | surfeit 6                                                                                         | RNA binding                                            | Nucleolus                         | RNA binding protein              | Regulation of nucleoside, nucleotide and nucleic acid metabolism | CC                      | Yes                      |
| TM9SF2      | 9375    | transmembrane 9 superfamily member 2 precursor                   | NP_004791.1       | 1          | 7                 | 8          | 14     | 1.13                                                     | 1.01                                                     | 2.78                                                                                   | 15.14                                                                                  | 8.3                                                                                           | 42                                                                                            | 7                                                                              | 7                                                                              | 9198    | 9375           | transmembrane 9 superfamily member 2                                                              | Molecular function unknown                             | Endosome                          | Integral membrane protein        | Transport                                                        | TM;SP                   | No                       |
| ST14        | 6768    | suppressor of tumorigenicity 14 protein                          | NP_068813.1       | 1          | 3                 | 3          | 5      | 1.13                                                     | 1                                                        | 5.39                                                                                   | 3.17                                                                                   | 12.2                                                                                          | 6.3                                                                                           | 4                                                                              | 4                                                                              | 6005    | 6768           | suppression of tumorigenicity 14 (colorectal adenoma, matrilysin, eglysin)                        | Serine-type peptidase activity                         | Plasma membrane                   | Serine protease                  | Protein metabolism                                               | TM;CUB;LDLA;<br>TRYPSIN | Yes                      |
| SSH3        | 54961   | protein phosphatase Shinghot homolog 3                           | NP_060327.3       | 1          | 5                 | 6          | 8      | 1.13                                                     | 1                                                        | 12.12                                                                                  | 8.72                                                                                   | 31.4                                                                                          | 19.7                                                                                          | 5                                                                              | 5                                                                              | 9488    | 54961          | shinghot homolog 3 (Drosophila)                                                                   | Protein tyrosine/serine/threonine phosphatase activity | Cytoplasm                         | Dual specificity phosphatase     | Cell growth and/or maintenance                                   | DSPC                    | No                       |
| DPH1        | 1801    | diphthamide biosynthesis protein 1                               | NP_001374.3       | 1          | 1                 | 1          | 3      | 1.13                                                     | 0.99                                                     |                                                                                        |                                                                                        |                                                                                               |                                                                                               | 1                                                                              | 1                                                                              | 4634    | 1801           | DPH1 homolog (S. cerevisiae)                                                                      | Translation regulator activity                         | Cytoplasm                         | Translation regulatory protein   | Protein metabolism                                               | -                       | No                       |
| AP2M1       | 1173    | AP-2 complex subunit mu isoform a                                | NP_004059.2       | 2          | 9                 | 9          | 24     | 1.13                                                     | 0.98                                                     | 2.47                                                                                   | 10.85                                                                                  | 9.3                                                                                           | 36.5                                                                                          | 11                                                                             | 11                                                                             | 3014    | 1173           | adaptor-related protein complex 2, mu 1 subunit                                                   | Receptor signaling complex scaffold activity           | Plasma membrane                   | Adapter molecule                 | Transport                                                        | -                       | Yes                      |
| GOLGA5      | 9950    | Golgin subfamily A member 5                                      | NP_005104.3       | 1          | 3                 | 3          | 6      | 1.13                                                     | 0.98                                                     | 4.9                                                                                    | 17.43                                                                                  | 9.6                                                                                           | 30.3                                                                                          | 3                                                                              | 3                                                                              | 6079    | 9950           | golgi autoantigen, golgin subfamily a, 5                                                          | Auxiliary transport protein activity                   | Golgi apparatus;Nucleus;Cytoplasm | Membrane transport protein       | Transport                                                        | CC;TM                   | Yes                      |
| SOGA1       | 140710  | protein SOGA1 isoform 1                                          | NP_542194.2       | 2          | 1                 | 2          | 2      | 1.13                                                     | 0.97                                                     |                                                                                        |                                                                                        |                                                                                               |                                                                                               | 1                                                                              | 1                                                                              |         |                |                                                                                                   |                                                        |                                   |                                  |                                                                  |                         |                          |
| BHLHA15     | 168620  | class A basic helix-loop-helix protein 15                        | NP_803238.1       | 1          | 1                 | 1          | 1      | 1.13                                                     | 0.97                                                     |                                                                                        |                                                                                        |                                                                                               |                                                                                               | 1                                                                              | 1                                                                              | 16356   | 168620         | None                                                                                              | Transcription factor activity                          | Nucleus                           | Transcription factor             | Regulation of nucleoside, nucleotide and nucleic acid metabolism | HLH                     | Yes                      |
| CCDC47      | 57003   | coiled-coil domain-containing protein 47 precursor               | NP_064583.2       | 1          | 8                 | 8          | 22     | 1.13                                                     | 0.96                                                     | 7.46                                                                                   | 8.62                                                                                   | 29.8                                                                                          | 29.2                                                                                          | 12                                                                             | 12                                                                             | 17041   | 57003          | None                                                                                              | Molecular function unknown                             | Mitochondrion                     | Unclassified                     | Biological process unknown                                       | SP;CC                   | No                       |
| GLE1        | 2733    | nucleoporin GLE1 isoform 1                                       | NP_001003722.1    | 2          | 2                 | 2          | 2      | 1.13                                                     | 0.96                                                     | 14.26                                                                                  | 4.79                                                                                   | 23                                                                                            | 6.5                                                                                           | 2                                                                              | 2                                                                              | 4536    | 2733           | GLE1 RNA export mediator-like (yeast)                                                             | Transporter activity                                   | Nuclear membrane                  | Transport/cargo protein          | Transport                                                        | CC                      | No                       |
| NTSC3A      | 51251   | cytosolic 5'-nucleotidase 3A isoform 1                           | NP_001002010.1    | 3          | 2                 | 2          | 3      | 1.13                                                     | 0.95                                                     |                                                                                        |                                                                                        |                                                                                               |                                                                                               | 1                                                                              | 1                                                                              |         |                |                                                                                                   |                                                        |                                   |                                  |                                                                  |                         |                          |
| AAR2        | 25980   | protein AAR2 homolog                                             | NP_056326.2       | 1          | 3                 | 3          | 4      | 1.13                                                     | 0.94                                                     | 14.74                                                                                  | 37.47                                                                                  | 23.9                                                                                          | 52.8                                                                                          | 2                                                                              | 2                                                                              |         |                |                                                                                                   |                                                        |                                   |                                  |                                                                  |                         |                          |
| MED16       | 10025   | mediator of RNA polymerase II transcription subunit 16           | NP_005472.2       | 1          | 2                 | 2          | 3      | 1.13                                                     | 0.94                                                     | 12.14                                                                                  | 26.74                                                                                  | 19.6                                                                                          | 36.5                                                                                          | 2                                                                              | 2                                                                              | 6816    | 10025          | thyroid hormone receptor associated protein 5                                                     | Transcription factor activity                          | Nucleus                           | Transcription factor             | Regulation of nucleoside, nucleotide and nucleic acid metabolism | WD40                    | No                       |
| THOC1       | 9984    | THO complex subunit 1                                            | NP_005122.2       | 1          | 4                 | 4          | 5      | 1.13                                                     | 0.92                                                     | 5.67                                                                                   | 9.65                                                                                   | 9.1                                                                                           | 12.7                                                                                          | 2                                                                              | 2                                                                              | 9498    | 9984           | THO complex 1                                                                                     | Transcription regulator activity                       | Nucleus                           | Transcription regulatory protein | Regulation of nucleoside, nucleotide and nucleic acid metabolism | DEATH                   | Yes                      |
| COG8        | 84342   | conserved oligomeric Golgi complex subunit 8                     | NP_115758.3       | 1          | 4                 | 4          | 7      | 1.13                                                     | 0.92                                                     | 7.14                                                                                   | 7.26                                                                                   | 16.2                                                                                          | 13.4                                                                                          | 4                                                                              | 4                                                                              | 7374    | 84342          | component of oligomeric golgi complex 8                                                           | Transporter activity                                   | Golgi apparatus                   | Transport/cargo protein          | Transport                                                        | -                       | Yes                      |
| ARMC1       | 55156   | armadillo repeat-containing protein 1 isoform 1                  | NP_060590.1       | 2          | 2                 | 2          | 4      | 1.13                                                     | 0.92                                                     | 24.42                                                                                  | 40.16                                                                                  | 40.7                                                                                          | 55.9                                                                                          | 2                                                                              | 2                                                                              | 16506   | 55156          | armadillo repeat containing 1                                                                     | Molecular function unknown                             | -                                 | Unclassified                     | Biological process unknown                                       | ARM                     | No                       |
| RPS17       | 6218    | 40S ribosomal protein S17                                        | NP_001012.1       | 1          | 9                 | 9          | 89     | 1.13                                                     | 0.91                                                     | 5.86                                                                                   | 9.24                                                                                   | 46.7                                                                                          | 61.4                                                                                          | 45                                                                             | 45                                                                             | 1600    | 6218           | ribosomal protein S17                                                                             | Structural constituent of ribosome                     | Ribosome                          | Ribosomal subunit                | Protein metabolism                                               | -                       | Yes                      |
| SBF1        | 6305    | myotubularin-related protein 5                                   | NP_002963.2       | 1          | 3                 | 3          | 8      | 1.13                                                     | 0.9                                                      | 13.01                                                                                  | 15.24                                                                                  | 30.1                                                                                          | 27.9                                                                                          | 4                                                                              | 4                                                                              | 6788    | 6305           | SET binding factor 1                                                                              | Molecular function unknown                             | Cytoplasm                         | Unclassified                     | Cell communication;Signal transduction                           | GRAM;PH                 | Yes                      |
| SMARCC2     | 6601    | SWI/SNF complex subunit SMARCC2 isoform a                        | NP_003066.2       | 3          | 4                 | 9          | 27     | 1.13                                                     | 0.9                                                      | 7.16                                                                                   | 19.46                                                                                  | 24.6                                                                                          | 56.6                                                                                          | 9                                                                              | 9                                                                              | 3437    | 6601           | SWI/SNF related, matrix associated, actin-dependent regulator of chromatin, subfamily c, member 2 | Transcription factor activity                          | Nucleus                           | Transcription factor             | Regulation of nucleoside, nucleotide and nucleic acid metabolism | CHROMO;SANT;CC          | Yes                      |
| PIN4        | 5303    | peptidyl-prolyl cis-trans isomerase NIMA-interacting 4 isoform 1 | NP_006214.2       | 2          | 1                 | 1          | 1      | 1.13                                                     | 0.89                                                     |                                                                                        |                                                                                        |                                                                                               |                                                                                               | 1                                                                              | 1                                                                              | 2219    | 5303           | protein (peptidyl-prolyl) cis-trans isomerase (NIMA-interacting 4 (parvulin))                     | Isomerase activity                                     | Nucleus                           | Enzyme;Isomerase                 | Metabolism;Energy pathways                                       | -                       | Yes                      |
| SPC24       | 147841  | kinetochore protein Spc24                                        | NP_872319.1       | 1          | 1                 | 1          | 2      | 1.13                                                     | 0.89                                                     |                                                                                        |                                                                                        |                                                                                               |                                                                                               | 1                                                                              | 1                                                                              | 15464   | 147841         | spindle pole body component 24 homolog (S.cerevisiae)                                             | Protein binding                                        | Nucleus                           | Cell cycle control protein       | Cell communication;Signal transduction                           | CC                      | No                       |
| SLC25A16    | 8034    | graves disease carrier protein                                   | NP_689920.1       | 1          | 1                 | 1          | 2      | 1.13                                                     | 0.87                                                     |                                                                                        |                                                                                        |                                                                                               |                                                                                               | 1                                                                              | 1                                                                              | 740     | 8034           | solute carrier family 25 (mitochondrial carrier; Graves disease autoantigen), member 16           | Auxiliary transport protein activity                   | Mitochondrion                     | Membrane transport protein       | Transport                                                        | -                       | Yes                      |



Supplementary Table S1. List of quantified proteins in OKF6/TERT1-Smoke cells

Raignanalan *et al.*, 2017. Role of protein kinase N2 (PKN2) in cigarette smoke-mediated oncogenic transformation of oral cells

| Gene Symbol | Gene ID | Protein Description                                                           | Protein Accession | # Proteins | # Unique Peptides | # Peptides | # PSMs | OKF6/TERT1-Smoke/<br>OKF6/TERT1-Parental<br>(130/126) R1 | OKF6/TERT1-Smoke/<br>OKF6/TERT1-Parental<br>(128/127) R2 | Ratio Standard Errors [%]:<br>OKF6/TERT1-Smoke/<br>OKF6/TERT1-Parental<br>(130/126) R1 | Ratio Standard Errors [%]:<br>OKF6/TERT1-Smoke/<br>OKF6/TERT1-Parental<br>(128/127) R2 | Ratio Variabilities [%]:<br>F13: OKF6/TERT1-<br>Smoke/<br>OKF6/TERT1-Parental<br>(130/126) R1 | Ratio Variabilities [%]:<br>F13: OKF6/TERT1-<br>Smoke/<br>OKF6/TERT1-Parental<br>(128/127) R2 | Ratio Counts: F13:<br>OKF6/TERT1-Smoke/<br>OKF6/TERT1-Parental<br>(130/126) R1 | Ratio Counts: F13:<br>OKF6/TERT1-Smoke/<br>OKF6/TERT1-Parental<br>(128/127) R2 | HPRD ID | Entrez Gene Id | Gene Name                                                             | Molecular Function                                           | Primary Localization  | Molecular Class                  | Biological Process                                               | Domains               | Plasma Proteome Database |
|-------------|---------|-------------------------------------------------------------------------------|-------------------|------------|-------------------|------------|--------|----------------------------------------------------------|----------------------------------------------------------|----------------------------------------------------------------------------------------|----------------------------------------------------------------------------------------|-----------------------------------------------------------------------------------------------|-----------------------------------------------------------------------------------------------|--------------------------------------------------------------------------------|--------------------------------------------------------------------------------|---------|----------------|-----------------------------------------------------------------------|--------------------------------------------------------------|-----------------------|----------------------------------|------------------------------------------------------------------|-----------------------|--------------------------|
| RPL23A      | 6147    | 60S ribosomal protein L23a                                                    | NP_000975.2       | 1          | 10                | 10         | 49     | 1.12                                                     | 1.14                                                     | 3.97                                                                                   | 4.61                                                                                   | 24                                                                                            | 28.5                                                                                          | 28                                                                             | 28                                                                             | 15998   | 6147           | ribosomal protein L23a                                                | RNA binding                                                  | Cytoplasm             | RNA binding protein              | Regulation of nucleobase, nucleoside and nucleic acid metabolism | -                     | Yes                      |
| LUZP1       | 7798    | leucine zipper protein 1                                                      | NP_361013.3       | 1          | 20                | 20         | 34     | 1.12                                                     | 1.13                                                     | 4.39                                                                                   | 4.71                                                                                   | 21.7                                                                                          | 23.5                                                                                          | 19                                                                             | 19                                                                             | 3250    | 7798           | leucine zipper protein 1                                              | Transcription regulator activity                             | Nucleus               | Transcription regulatory protein | Regulation of nucleobase, nucleoside and nucleic acid metabolism | CCL2,NLS              | Yes                      |
| OLA1        | 29789   | obg-like ATPase 1 isoform 1                                                   | NP_037473.3       | 2          | 14                | 14         | 60     | 1.12                                                     | 1.12                                                     | 1.59                                                                                   | 4.48                                                                                   | 10                                                                                            | 28.6                                                                                          | 31                                                                             | 31                                                                             | 15194   | 29789          | None                                                                  | Molecular function unknown                                   | Nucleolus             | Unclassified                     | Biological process unknown                                       | -                     | Yes                      |
| FNDC3B      | 64778   | fibronectin type III domain-containing protein 3B                             | NP_073600.3       | 1          | 6                 | 6          | 12     | 1.12                                                     | 1.11                                                     | 6.07                                                                                   | 6.97                                                                                   | 16.7                                                                                          | 19.1                                                                                          | 6                                                                              | 6                                                                              | 10943   | 64778          | fibronectin type III domain containing 3B                             | Molecular function unknown                                   | -                     | Integral membrane protein        | Biological process unknown                                       | FN3,TM                | No                       |
| TRAP1       | 10131   | heat shock protein 75 kDa, mitochondrial isoform 1 precursor                  | NP_057376.2       | 2          | 21                | 22         | 93     | 1.12                                                     | 1.11                                                     | 4.31                                                                                   | 6.44                                                                                   | 31.5                                                                                          | 48.2                                                                                          | 41                                                                             | 41                                                                             | 5868    | 10131          | TNF receptor-associated protein 1                                     | Heat shock protein activity                                  | Mitochondrion         | Heat shock protein               | Protein metabolism                                               | -                     | Yes                      |
| VAPB        | 9217    | vesicle-associated membrane protein-associated protein B/C isoform 1          | NP_004729.1       | 2          | 12                | 13         | 33     | 1.12                                                     | 1.1                                                      | 7.44                                                                                   | 4.84                                                                                   | 35.5                                                                                          | 22.3                                                                                          | 17                                                                             | 17                                                                             | 9300    | 9217           | VAMP (vesicle-associated membrane protein)-associated protein B and C | Auxiliary transport protein activity                         | Plasma membrane       | Membrane transport protein       | Transport                                                        | CC,TM                 | Yes                      |
| CKAP5       | 9793    | cytoskeleton-associated protein 5 isoform a                                   | NP_001008938.1    | 2          | 30                | 30         | 78     | 1.12                                                     | 1.07                                                     | 3.02                                                                                   | 2.59                                                                                   | 21.8                                                                                          | 17.9                                                                                          | 41                                                                             | 41                                                                             | 10830   | 9793           | cytoskeleton associated protein 5                                     | Cytoskeletal protein binding                                 | Centriosome           | Cytoskeletal associated protein  | Mitosis                                                          | -                     | Yes                      |
| PGM1        | 5236    | phosphoglucomutase-1 isoform 1                                                | NP_002624.2       | 3          | 23                | 23         | 88     | 1.12                                                     | 1.07                                                     | 3.1                                                                                    | 4.92                                                                                   | 24.2                                                                                          | 37.1                                                                                          | 47                                                                             | 47                                                                             | 1389    | 5236           | phosphoglucomutase 1                                                  | Catalytic activity                                           | Cytoplasm             | Enzyme: Mutase                   | Metabolism;Energy pathways                                       | -                     | Yes                      |
| ERBB2IP     | 55914   | protein LAP2 isoform 8                                                        | NP_001240628.1    | 6          | 9                 | 9          | 15     | 1.12                                                     | 1.06                                                     | 5.59                                                                                   | 7.04                                                                                   | 16.7                                                                                          | 19.9                                                                                          | 7                                                                              | 7                                                                              | 6090    | 55914          | erbB2 interacting protein                                             | Protein binding;Receptor signaling complex scaffold activity | Plasma membrane       | Adapter molecule                 | Signal transduction;Cell communication                           | PDZ,LRR               | Yes                      |
| CNO17       | 29883   | CCR4-NOT transcription complex subunit 7 isoform 1                            | NP_037486.2       | 2          | 3                 | 3          | 7      | 1.12                                                     | 1.06                                                     | 11.38                                                                                  | 17.51                                                                                  | 22.3                                                                                          | 33                                                                                            | 3                                                                              | 3                                                                              | 5370    | 29883          | CCR4-NOT transcription complex, subunit 7                             | Transcription regulator activity                             | Nucleus               | Transcription regulatory protein | Regulation of nucleobase, nucleoside and nucleic acid metabolism | -                     | Yes                      |
| ITPK1       | 3705    | inositol-tetrakisphosphate 1-kinase isoform a                                 | NP_055031.2       | 2          | 5                 | 5          | 10     | 1.12                                                     | 1.06                                                     | 4.06                                                                                   | 5.41                                                                                   | 11.1                                                                                          | 14.1                                                                                          | 6                                                                              | 6                                                                              | 3501    | 3705           | inositol 1,3,4-triphosphate 5/6 kinase                                | Catalytic activity                                           | -                     | Enzyme: Phosphotransferase       | Cell communication;Signal transduction                           | -                     | Yes                      |
| Sep-09      | 10801   | septin-9 isoform a                                                            | NP_001106963.1    | 8          | 32                | 32         | 113    | 1.12                                                     | 1.06                                                     | 2.45                                                                                   | 3.9                                                                                    | 21                                                                                            | 32.1                                                                                          | 57                                                                             | 57                                                                             |         |                |                                                                       |                                                              |                       |                                  |                                                                  |                       |                          |
| ALDH16A1    | 126133  | aldehyde dehydrogenase family 16 member A1 isoform 1                          | NP_699160.2       | 2          | 10                | 10         | 25     | 1.12                                                     | 1.05                                                     | 5.85                                                                                   | 8.99                                                                                   | 21                                                                                            | 30.4                                                                                          | 10                                                                             | 10                                                                             | 14394   | 126133         | aldehyde dehydrogenase 16 family, member A1                           | Molecular function unknown                                   | -                     | Unclassified                     | Biological process unknown                                       | CC                    | Yes                      |
| SCAMP4      | 113178  | secretory carrier-associated membrane protein 4                               | NP_524558.1       | 1          | 2                 | 2          | 4      | 1.12                                                     | 1.05                                                     | 6.05                                                                                   | 3.98                                                                                   | 9.6                                                                                           | 5.9                                                                                           | 2                                                                              | 2                                                                              | 11536   | 113178         | secretory carrier membrane protein 4                                  | Auxiliary transport protein activity                         | Cytoplasmic vesicle   | Membrane transport protein       | Transport                                                        | TM                    | No                       |
| QTRTD1      | 79691   | queuine tRNA-ribosyltransferase subunit QTRTD1 isoform 2                      | NP_001243764.1    | 4          | 4                 | 4          | 13     | 1.12                                                     | 1.05                                                     | 2.28                                                                                   | 8.67                                                                                   | 6.8                                                                                           | 24.3                                                                                          | 7                                                                              | 7                                                                              | 17944   | 79691          | queuine tRNA-ribosyltransferase domain-containing 1                   | Catalytic activity                                           | -                     | Enzyme: Ribosyltransferase       | Metabolism;Energy pathways                                       | -                     | Yes                      |
| ELP5        | 23587   | elongator complex protein 5 isoform 1                                         | NP_981960.1       | 1          | 1                 | 1          | 2      | 1.12                                                     | 1.03                                                     |                                                                                        |                                                                                        |                                                                                               |                                                                                               | 1                                                                              | 1                                                                              |         |                |                                                                       |                                                              |                       |                                  |                                                                  |                       |                          |
| RAPH1       | 65059   | ras-associated and plectstrin homology domains-containing protein 1 isoform 1 | NP_998754.1       | 2          | 4                 | 4          | 6      | 1.12                                                     | 1.02                                                     | 16.84                                                                                  | 16.11                                                                                  | 33.5                                                                                          | 29                                                                                            | 3                                                                              | 3                                                                              | 12356   | 65059          | Ras association (RalGDS/AF-6) and plectstrin homology domains 1       | Cytoskeletal protein binding                                 | Cell projection       | Cytoskeletal associated protein  | Cell growth and/or maintenance                                   | RA,PH,CC              | Yes                      |
| KPNA6       | 23633   | importin subunit alpha-7                                                      | NP_036448.1       | 2          | 5                 | 10         | 33     | 1.12                                                     | 1.02                                                     | 12.36                                                                                  | 4.05                                                                                   | 37.8                                                                                          | 11                                                                                            | 7                                                                              | 7                                                                              | 9465    | 23633          | karyopherin alpha 6 (importin alpha 7)                                | Receptor signaling complex scaffold activity                 | Nucleus               | Adapter molecule                 | Transport                                                        | ARM                   | Yes                      |
| FAM84B      | 157638  | protein FAM84B                                                                | NP_777571.1       | 1          | 2                 | 2          | 3      | 1.12                                                     | 1.01                                                     | 26.52                                                                                  | 0.75                                                                                   | 43.8                                                                                          | 1.1                                                                                           | 2                                                                              | 2                                                                              | 11403   | 157638         | None                                                                  | Molecular function unknown                                   | Plasma membrane       | Unclassified                     | Biological process unknown                                       | -                     | No                       |
| TMCC3       | 57458   | transmembrane and coiled-coil domains protein 3 isoform 1                     | NP_065749.2       | 2          | 1                 | 1          | 2      | 1.12                                                     | 1.01                                                     |                                                                                        |                                                                                        |                                                                                               |                                                                                               | 1                                                                              | 1                                                                              | 15519   | 57458          | transmembrane and coiled-coil domains 3                               | Molecular function unknown                                   | Integral to membrane  | Integral membrane protein        | Biological process unknown                                       | CC,TM                 | Yes                      |
| FAM98A      | 25940   | protein FAM98A isoform 1                                                      | NP_056290.3       | 2          | 5                 | 5          | 9      | 1.12                                                     | 1.01                                                     | 9.56                                                                                   | 12.6                                                                                   | 24.4                                                                                          | 29.1                                                                                          | 5                                                                              | 5                                                                              | 16808   | 25940          | None                                                                  | Molecular function unknown                                   | -                     | Unclassified                     | Biological process unknown                                       | -                     | No                       |
| VPS33B      | 26276   | vacuolar protein sorting-associated protein 33B isoform 1                     | NP_061138.3       | 3          | 3                 | 3          | 5      | 1.12                                                     | 1                                                        | 2.79                                                                                   | 14.64                                                                                  | 5.4                                                                                           | 25.7                                                                                          | 3                                                                              | 3                                                                              | 10541   | 26276          | vacuolar protein sorting 33B (yeast)                                  | Transporter activity                                         | Cytoplasm             | Transport/cargo protein          | Transport                                                        | -                     | Yes                      |
| PUM1        | 9698    | pumilio homolog 1 isoform 1                                                   | NP_001018494.1    | 6          | 5                 | 5          | 12     | 1.12                                                     | 1                                                        | 2.16                                                                                   | 15.61                                                                                  | 6.4                                                                                           | 43.1                                                                                          | 7                                                                              | 7                                                                              | 6230    | 9698           | pumilio homolog 1 (Drosophila)                                        | RNA binding                                                  | Nucleus/Cytoplasm     | RNA binding protein              | Regulation of translation                                        | Pumilio               | Yes                      |
| LPCAT1      | 79888   | lysophosphatidylcholine acyltransferase 1                                     | NP_079106.3       | 1          | 7                 | 7          | 19     | 1.12                                                     | 0.98                                                     | 4.21                                                                                   | 9.85                                                                                   | 14.2                                                                                          | 31.2                                                                                          | 9                                                                              | 10                                                                             | 8572    | 79888          | None                                                                  | Acyltransferase activity                                     | Endoplasmic reticulum | Enzyme: Acyltransferase          | Cell organization and biogenesis                                 | TM                    | No                       |
| CHMP7       | 91782   | charged multivesicular body protein 7                                         | NP_689485.1       | 1          | 1                 | 1          | 2      | 1.12                                                     | 0.98                                                     |                                                                                        |                                                                                        |                                                                                               |                                                                                               | 1                                                                              | 1                                                                              | 14534   | 91782          | CHMP family, member 7                                                 | Molecular function unknown                                   | -                     | Unclassified                     | Biological process unknown                                       | CC                    | No                       |
| TNFRSF10A   | 8797    | tumor necrosis factor receptor superfamily member 10A                         | NP_003835.3       | 1          | 2                 | 2          | 2      | 1.12                                                     | 0.98                                                     |                                                                                        |                                                                                        |                                                                                               |                                                                                               | 1                                                                              | 1                                                                              | 4679    | 8797           | tumor necrosis factor receptor superfamily member 10a                 | Receptor activity                                            | Integral to membrane  | Cell surface receptor            | Cell communication;Signal transduction                           | TM;TNFR;DEATH SP      | Yes                      |
| SORL1       | 6653    | sortilin-related receptor preproprotein                                       | NP_003096.1       | 1          | 3                 | 3          | 5      | 1.12                                                     | 0.98                                                     | 8.49                                                                                   | 0.58                                                                                   | 16.6                                                                                          | 1                                                                                             | 3                                                                              | 3                                                                              | 3595    | 6653           | sortilin-related receptor, L(DLR class) Arepeats-containing           | Transmembrane receptor activity                              | Plasma membrane       | Integral membrane protein        | Cell communication;Signal transduction                           | SP,LDLRB;LDL A;FN3,TM | Yes                      |
| CHMP2A      | 27243   | charged multivesicular body protein 2a                                        | NP_055268.1       | 1          | 5                 | 5          | 9      | 1.12                                                     | 0.98                                                     | 21.43                                                                                  | 19.45                                                                                  | 50.7                                                                                          | 39.6                                                                                          | 4                                                                              | 4                                                                              | 12520   | 27243          | chromatin modifying protein 2A                                        | Transporter activity                                         | Cytoplasm             | Transport/cargo protein          | Transport                                                        | CC                    | No                       |
| PTGR1       | 22949   | prostaglandin reductase 1 isoform 1                                           | NP_036344.2       | 2          | 15                | 15         | 41     | 1.12                                                     | 0.97                                                     | 3.91                                                                                   | 5.44                                                                                   | 21.7                                                                                          | 25.6                                                                                          | 24                                                                             | 23                                                                             | 3173    | 22949          | leukotriene B4 12-hydroxydehydrogenase                                | Catalytic activity                                           | Cytoplasm             | Enzyme: Dehydrogenase            | Metabolism;Energy pathways                                       | -                     | Yes                      |

Supplementary Table S1. List of quantified proteins in OKF6/TERT1-Smoke cells  
 Raingonalan *et al.*, 2017. Role of protein kinase N2 (PKN2) in cigarette smoke-mediated oncogenic transformation of oral cells

| Gene Symbol | Gene ID | Protein Description                                       | Protein Accession | # Proteins | # Unique Peptides | # Peptides | # PSMs | OKF6/TERT1-Smoke/<br>OKF6/TERT1-Parental<br>(130/126) R1 | OKF6/TERT1-Smoke/<br>OKF6/TERT1-Parental<br>(128/127) R2 | Ratio Standard Errors [%]:<br>OKF6/TERT1-Smoke/<br>OKF6/TERT1-Parental<br>(130/126) R1 | Ratio Standard Errors [%]:<br>OKF6/TERT1-Smoke/<br>OKF6/TERT1-Parental<br>(128/127) R2 | Ratio Variabilities [%]:<br>F13: OKF6/TERT1-<br>Smoke/<br>OKF6/TERT1-Parental<br>(130/126) R1 | Ratio Variabilities [%]:<br>F13: OKF6/TERT1-<br>Smoke/<br>OKF6/TERT1-Parental<br>(128/127) R2 | Ratio Counts: F13:<br>OKF6/TERT1-Smoke/<br>OKF6/TERT1-Parental<br>(130/126) R1 | Ratio Counts: F13:<br>OKF6/TERT1-Smoke/<br>OKF6/TERT1-Parental<br>(128/127) R2 | HPRD ID | Entrez Gene Id | Gene Name                                                                                           | Molecular Function                           | Primary Localization  | Molecular Class                     | Biological Process                                               | Domains             | Plasma Proteome Database |  |
|-------------|---------|-----------------------------------------------------------|-------------------|------------|-------------------|------------|--------|----------------------------------------------------------|----------------------------------------------------------|----------------------------------------------------------------------------------------|----------------------------------------------------------------------------------------|-----------------------------------------------------------------------------------------------|-----------------------------------------------------------------------------------------------|--------------------------------------------------------------------------------|--------------------------------------------------------------------------------|---------|----------------|-----------------------------------------------------------------------------------------------------|----------------------------------------------|-----------------------|-------------------------------------|------------------------------------------------------------------|---------------------|--------------------------|--|
| C14orf166   | 51637   | UPF0568 protein C14orf166                                 | NP_057123.1       | 1          | 10                | 10         | 40     | 1.12                                                     | 0.97                                                     | 6.97                                                                                   | 9.6                                                                                    | 31.1                                                                                          | 38.7                                                                                          | 15                                                                             | 16                                                                             | 16615   | 51637          | chromosome 14 open reading frame 166                                                                | Transcription regulator activity             | Nucleus               | Transcription regulatory protein    | Regulation of nucleobase, nucleotide and nucleic acid metabolism | NLS,CC              | Yes                      |  |
| DHX38       | 9785    | pre-mRNA-splicing factor ATP-dependent RNA helicase PRP16 | NP_054722.2       | 1          | 9                 | 9          | 20     | 1.12                                                     | 0.96                                                     | 9.13                                                                                   | 3.58                                                                                   | 27.5                                                                                          | 9.1                                                                                           | 7                                                                              | 7                                                                              | 5720    | 9785           | DEAH (Asp-Glu-Ala-His) box polypeptide 38                                                           | RNA binding                                  | Nucleus               | RNA binding protein                 | Regulation of nucleobase, nucleotide and nucleic acid metabolism | DEXDc;HELICc;C      | Yes                      |  |
| TP53BP1     | 7158    | tumor suppressor p53-binding protein 1 isoform 1          | NP_001135452.1    | 3          | 19                | 19         | 55     | 1.12                                                     | 0.96                                                     | 4.03                                                                                   | 6.66                                                                                   | 22.3                                                                                          | 32.1                                                                                          | 24                                                                             | 24                                                                             | 5569    | 7158           | tumor protein p53 binding protein, 1                                                                | Transcription regulator activity             | Nucleus               | Transcription regulatory protein    | Regulation of nucleobase, nucleotide and nucleic acid metabolism | BRCT                | Yes                      |  |
| EIF4A2      | 1974    | eukaryotic initiation factor 4A-II                        | NP_001958.2       | 1          | 9                 | 21         | 95     | 1.12                                                     | 0.92                                                     | 4.42                                                                                   | 13.11                                                                                  | 19.3                                                                                          | 49.5                                                                                          | 15                                                                             | 15                                                                             | 3062    | 1974           | eukaryotic translation initiation factor 4A, isoform 2                                              | Translation regulator activity               | Cytoplasm             | Translation regulatory protein      | Protein metabolism                                               | DEXDc;HELIC         | Yes                      |  |
| ATRX        | 546     | transcriptional regulator ATRX isoform 1                  | NP_000480.3       | 2          | 1                 | 2          | 4      | 1.12                                                     | 0.91                                                     |                                                                                        |                                                                                        |                                                                                               |                                                                                               | 1                                                                              | 1                                                                              | 2069    | 546            | alpha thalassemia/mental retardation syndrome X-linked (RAD54 homolog, S. cerevisiae)               | Transcription regulator activity             | Nucleus;Cytoplasm     | Transcription regulatory protein    | Regulation of nucleobase, nucleotide and nucleic acid metabolism | RING;DEXDc;HELIC;CC | Yes                      |  |
| HCFC1       | 3054    | host cell factor 1                                        | NP_005325.2       | 1          | 16                | 16         | 38     | 1.12                                                     | 0.9                                                      | 3.64                                                                                   | 7.26                                                                                   | 18.9                                                                                          | 30.7                                                                                          | 21                                                                             | 21                                                                             | 2061    | 3054           | host cell factor C1 (VP16-accessory protein)                                                        | Transcription factor activity                | Nucleus;Cytoplasm     | Transcription factor                | Regulation of nucleobase, nucleotide and nucleic acid metabolism | NLS;KELCHFN3        | Yes                      |  |
| UHRF2       | 115426  | E3 ubiquitin-protein ligase UHRF2                         | NP_690856.1       | 1          | 1                 | 1          | 1      | 1.12                                                     | 0.9                                                      |                                                                                        |                                                                                        |                                                                                               |                                                                                               | 1                                                                              | 1                                                                              | 18257   | 115426         | ubiquitin-like, containing PHD and RING finger domains, 2                                           | Ubiquitin-specific protease activity         | Nucleus               | Ubiquitin proteasome system protein | Protein metabolism                                               | UBQ;PHD;RING;NLS    | No                       |  |
| ILK         | 3611    | integrin-linked protein kinase isoform 1                  | NP_004508.1       | 3          | 8                 | 8          | 24     | 1.12                                                     | 0.9                                                      | 8.47                                                                                   | 24.04                                                                                  | 32.4                                                                                          | 82.3                                                                                          | 11                                                                             | 11                                                                             | 3842    | 3611           | integrin-linked kinase                                                                              | Protein serine/threonine kinase activity     | Cytoplasm             | Serine/threonine kinase             | Cell communication;Signal transduction                           | ANK                 | Yes                      |  |
| PACS1       | 55690   | phosphofurin acidic cluster sorting protein 1             | NP_060496.2       | 1          | 5                 | 5          | 9      | 1.12                                                     | 0.89                                                     | 4.23                                                                                   | 7.57                                                                                   | 8.2                                                                                           | 11.7                                                                                          | 3                                                                              | 3                                                                              | 6320    | 55690          | phosphofurin acidic cluster sorting protein 1                                                       | Receptor signaling complex scaffold activity | Cytoplasm             | Adapter molecule                    | Transport                                                        | -                   | Yes                      |  |
| TMA16       | 55319   | translation machinery-associated protein 16               | NP_060822.2       | 1          | 3                 | 3          | 8      | 1.12                                                     | 0.86                                                     | 8.03                                                                                   | 7.52                                                                                   | 18.2                                                                                          | 13                                                                                            | 4                                                                              | 4                                                                              |         |                |                                                                                                     |                                              |                       |                                     |                                                                  |                     |                          |  |
| SLC4A7      | 9497    | sodium bicarbonate cotransporter 3 isoform b              | NP_001245308.1    | 3          | 5                 | 5          | 13     | 1.12                                                     | 0.85                                                     | 6.03                                                                                   | 6.27                                                                                   | 17.9                                                                                          | 14.2                                                                                          | 7                                                                              | 7                                                                              | 4521    | 9497           | solute carrier family 4, sodium bicarbonate cotransporter, member 7                                 | Transporter activity                         | Plasma membrane       | Transport/cargo protein             | Transport                                                        | TM                  | Yes                      |  |
| SNX4        | 8723    | sorting nexin-4                                           | NP_003785.1       | 1          | 1                 | 1          | 1      | 1.12                                                     | 0.84                                                     |                                                                                        |                                                                                        |                                                                                               |                                                                                               | 1                                                                              | 1                                                                              | 9334    | 8723           | sorting nexin 4                                                                                     | Transporter activity                         | Integral to membrane  | Transport/cargo protein             | Transport                                                        | PX;CC               | Yes                      |  |
| SERPINC1    | 710     | plasma protease C1 inhibitor precursor                    | NP_000053.2       | 1          | 1                 | 1          | 2      | 1.12                                                     | 0.77                                                     |                                                                                        |                                                                                        |                                                                                               |                                                                                               | 1                                                                              | 1                                                                              | 6033    | 710            | serine (or cysteine) protease inhibitor, clade G (C1 inhibitor), member 1, (angioedema, hereditary) | Protease inhibitor activity                  | Extracellular matrix  | Protease inhibitor                  | Protein metabolism                                               | SERPIN;SP           | Yes                      |  |
| GOLT1B      | 51026   | vesicle transport protein GOT1B                           | NP_057156.1       | 1          | 1                 | 1          | 3      | 1.12                                                     | 0.75                                                     | 2.13                                                                                   | 7.62                                                                                   | 3.4                                                                                           | 8.1                                                                                           | 2                                                                              | 2                                                                              | 13035   | 51026          | golgi transport 1 homolog B (S. cerevisiae)                                                         | Molecular function unknown                   | -                     | Unclassified                        | Cell communication;Signal transduction                           | TM                  | Yes                      |  |
| EEF1D       | 1936    | elongation factor 1-delta isoform 4                       | NP_001123528.1    | 1          | 1                 | 9          | 46     | 1.12                                                     | 0.75                                                     |                                                                                        |                                                                                        |                                                                                               |                                                                                               | 1                                                                              | 1                                                                              | 560     | 1936           | eukaryotic translation elongation factor 1 delta (guanine nucleotide exchange protein)              | Guanyl-nucleotide exchange factor activity   | Endoplasmic reticulum | Guanine nucleotide exchange factor  | Cell communication;Signal transduction                           | CC                  | Yes                      |  |
| STK26       | 51765   | serine/threonine-protein kinase 26 isoform 1              | NP_057626.2       | 3          | 4                 | 9          | 24     | 1.12                                                     | 0.74                                                     | 3.29                                                                                   | 11.46                                                                                  | 9                                                                                             | 20.9                                                                                          | 6                                                                              | 6                                                                              |         |                |                                                                                                     |                                              |                       |                                     |                                                                  |                     |                          |  |
| SLAIN2      | 57606   | SLAIN motif-containing protein 2                          | NP_065897.1       | 1          | 5                 | 5          | 8      | 1.12                                                     | 0.69                                                     | 16.04                                                                                  | 12.4                                                                                   | 37                                                                                            | 17.3                                                                                          | 4                                                                              | 4                                                                              | 13863   | 57606          | None                                                                                                | Molecular function unknown                   | -                     | Unclassified                        | Biological process unknown                                       | CC                  | No                       |  |
| TCP11       | 6954    | T-complex protein 11 homolog isoform 1                    | NP_001087197.1    | 6          | 1                 | 1          | 1      | 1.12                                                     | 0.6                                                      |                                                                                        |                                                                                        |                                                                                               |                                                                                               | 1                                                                              | 1                                                                              | 1749    | 6954           | T-complex 11 (mouse)                                                                                | Receptor activity                            | Plasma membrane       | Cell surface receptor               | Cell communication;Signal transduction                           | -                   | No                       |  |
| C18orf21    | 83608   | UPF0711 protein C18orf21 isoform a                        | NP_113634.3       | 2          | 1                 | 1          | 1      | 1.12                                                     | 0.6                                                      |                                                                                        |                                                                                        |                                                                                               |                                                                                               | 1                                                                              | 1                                                                              | 12688   | 83608          | chromosome 18 open reading frame 21                                                                 | Molecular function unknown                   | -                     | Unclassified                        | Biological process unknown                                       | -                   | No                       |  |
| STP1        | 10963   | stress-induced-phosphoprotein 1 isoform a                 | NP_001269581.1    | 3          | 25                | 25         | 65     | 1.11                                                     | 1.91                                                     | 5.12                                                                                   | 5.49                                                                                   | 35.7                                                                                          | 70.8                                                                                          | 37                                                                             | 37                                                                             | 5454    | 10963          | stress-induced-phosphoprotein 1 (Hsp70/Hsp90-organizing protein)                                    | Receptor signaling complex scaffold activity | Nucleus               | Adapter molecule                    | Cell communication;Signal transduction                           | TPR;STH1;NLS        | Yes                      |  |
| FBXO2       | 26232   | F-box only protein 2                                      | NP_036300.2       | 1          | 5                 | 5          | 32     | 1.11                                                     | 1.53                                                     | 2.79                                                                                   | 4.94                                                                                   | 12                                                                                            | 29.9                                                                                          | 15                                                                             | 15                                                                             | 6171    | 26232          | F-box protein 2                                                                                     | Ubiquitin-specific protease activity         | Cytoplasm             | Ubiquitin proteasome system protein | Protein metabolism                                               | F_BOX               | No                       |  |
| ERP44       | 23071   | endoplasmic reticulum resident protein 44 precursor       | NP_055866.1       | 1          | 13                | 13         | 38     | 1.11                                                     | 1.51                                                     | 2.87                                                                                   | 2.72                                                                                   | 14.6                                                                                          | 19                                                                                            | 21                                                                             | 21                                                                             | 10290   | 23071          | thioredoxin domain containing 4 (endoplasmic reticulum)                                             | Molecular function unknown                   | Endoplasmic reticulum | Unclassified                        | Protein metabolism                                               | SP                  | Yes                      |  |
| DDX28       | 55794   | probable ATP-dependent RNA helicase DDX28                 | NP_06080.2        | 1          | 4                 | 4          | 9      | 1.11                                                     | 1.41                                                     | 26.67                                                                                  | 40.35                                                                                  | 74.4                                                                                          | 201.6                                                                                         | 5                                                                              | 5                                                                              | 6357    | 55794          | DEAD (Asp-Glu-Ala-Asp) box polypeptide 28                                                           | RNA binding                                  | Mitochondrion         | RNA binding protein                 | Regulation of nucleobase, nucleotide and nucleic acid metabolism | DEXDc;HELIC;NLS;NES | No                       |  |

Supplementary Table S1. List of quantified proteins in OKF6/TERT1-Smoke cells  
 Raingopaln *et al.*, 2017. Role of protein kinase N2 (PKN2) in cigarette smoke-mediated oncogenic transformation of oral cells

| Gene Symbol | Gene ID | Protein Description                                                                          | Protein Accession | # Proteins | # Unique Peptides | # Peptides | # PSMs | OKF6/TERT1-Smoke/<br>OKF6/TERT1-Parental<br>(130/126) R1 | OKF6/TERT1-Smoke/<br>OKF6/TERT1-Parental<br>(128/127) R2 | Ratio Standard Errors [%]:<br>OKF6/TERT1-Smoke/<br>OKF6/TERT1-Parental<br>(130/126) R1 | Ratio Standard Errors [%]:<br>OKF6/TERT1-Smoke/<br>OKF6/TERT1-Parental<br>(128/127) R2 | Ratio Variabilities [%]:<br>F13: OKF6/TERT1-<br>Smoke/<br>OKF6/TERT1-Parental<br>(130/126) R1 | Ratio Variabilities [%]:<br>F13: OKF6/TERT1-<br>Smoke/<br>OKF6/TERT1-Parental<br>(128/127) R2 | Ratio Counts: F13:<br>OKF6/TERT1-Smoke/<br>OKF6/TERT1-Parental<br>(130/126) R1 | Ratio Counts: F13:<br>OKF6/TERT1-Smoke/<br>OKF6/TERT1-Parental<br>(128/127) R2 | HPRD ID | Entrez Gene ID | Gene Name                                                                                                       | Molecular Function                           | Primary Localization  | Molecular Class                     | Biological Process                                                           | Domains                    | Plasma Proteome Database |
|-------------|---------|----------------------------------------------------------------------------------------------|-------------------|------------|-------------------|------------|--------|----------------------------------------------------------|----------------------------------------------------------|----------------------------------------------------------------------------------------|----------------------------------------------------------------------------------------|-----------------------------------------------------------------------------------------------|-----------------------------------------------------------------------------------------------|--------------------------------------------------------------------------------|--------------------------------------------------------------------------------|---------|----------------|-----------------------------------------------------------------------------------------------------------------|----------------------------------------------|-----------------------|-------------------------------------|------------------------------------------------------------------------------|----------------------------|--------------------------|
| C19orf43    | 79002   | uncharacterized protein C19orf43                                                             | NP_076943.1       | 1          | 4                 | 4          | 5      | 1.11                                                     | 1.39                                                     | 4.41                                                                                   | 6.97                                                                                   | 9.8                                                                                           | 19.6                                                                                          | 4                                                                              | 4                                                                              | 14528   | 79002          | None                                                                                                            | Molecular function unknown                   | -                     | Unclassified                        | Biological process unknown                                                   | -                          | Yes                      |
| U2AF2       | 11338   | splicing factor U2AF 65 kDa subunit isoform a                                                | NP_009210.1       | 2          | 11                | 11         | 49     | 1.11                                                     | 1.38                                                     | 2.4                                                                                    | 2.96                                                                                   | 13.1                                                                                          | 20.2                                                                                          | 24                                                                             | 24                                                                             | 1872    | 11338          | U2 (RNU2) small nuclear RNA auxiliary factor 2                                                                  | Spliceosomal catalysis                       | Nucleus               | RNA binding protein                 | RNA metabolism                                                               | RRM                        | Yes                      |
| PGK1        | 5230    | phosphoglycerate kinase 1                                                                    | NP_000282.1       | 2          | 29                | 29         | 205    | 1.11                                                     | 1.34                                                     | 2.8                                                                                    | 3.3                                                                                    | 33.2                                                                                          | 48.6                                                                                          | 109                                                                            | 109                                                                            | 2412    | 5230           | phosphoglycerate kinase 1                                                                                       | Catalytic activity                           | Cytoplasm             | Enzyme: Phosphotransferase          | Metabolism;Energy pathways                                                   | PGK                        | Yes                      |
| MTHFD2      | 10797   | bifunctional methylenetetrahydrofolate dehydrogenase/cyclohydrolase, mitochondrial precursor | NP_006627.2       | 1          | 3                 | 3          | 5      | 1.11                                                     | 1.32                                                     | 13.81                                                                                  | 25.87                                                                                  | 27.1                                                                                          | 51.1                                                                                          | 3                                                                              | 2                                                                              | 5351    | 10797          | methylenetetrahydrofolate dehydrogenase (NADP-dependent) 2, methylenetetrahydrofolate cyclohydrolase            | Catalytic activity                           | Mitochondrion         | Enzyme: Dehydrogenase               | Metabolism;Energy pathways                                                   | SP                         | Yes                      |
| WDR3        | 10885   | WD repeat-containing protein 3                                                               | NP_006775.1       | 1          | 9                 | 9          | 19     | 1.11                                                     | 1.31                                                     | 3.94                                                                                   | 5.03                                                                                   | 14.6                                                                                          | 22.2                                                                                          | 11                                                                             | 11                                                                             | 16066   | 10885          | WD repeat domain 3                                                                                              | Molecular function unknown                   | Nucleus               | Unclassified                        | Biological process unknown                                                   | WD40;NLS                   | Yes                      |
| OSGEP       | 55644   | probable tRNA N6-adenosine threonylcarbamoyltransferase                                      | NP_060277.1       | 1          | 1                 | 1          | 2      | 1.11                                                     | 1.31                                                     | 1.31                                                                                   | 1.31                                                                                   | 1.31                                                                                          | 1.31                                                                                          | 1                                                                              | 1                                                                              | 10133   | 55644          | O-sialylglycoprotein endopeptidase                                                                              | Peptidase activity                           | -                     | Protease                            | Protein metabolism                                                           | -                          | Yes                      |
| COX1        | 4512    | cytochrome c oxidase subunit 1                                                               | YP_003024028.1    | 1          | 1                 | 1          | 1      | 1.11                                                     | 1.28                                                     | 1.28                                                                                   | 1.28                                                                                   | 1.28                                                                                          | 1.28                                                                                          | 1                                                                              | 1                                                                              |         |                |                                                                                                                 |                                              |                       |                                     |                                                                              |                            |                          |
| SMARCC1     | 6599    | SWI/SNF complex subunit SMARCC1                                                              | NP_003063.3       | 1          | 5                 | 10         | 19     | 1.11                                                     | 1.27                                                     | 1.34                                                                                   | 0.34                                                                                   | 3                                                                                             | 0.9                                                                                           | 4                                                                              | 4                                                                              | 3435    | 6599           | SWI/SNF related, matrix associated, independent regulator of chromatin, subfamily c, member 1                   | Transcription factor activity                | Nucleus               | Transcription factor                | Regulation of nucleobase, nucleoside, nucleotide and nucleic acid metabolism | CHROMO;SANT                | Yes                      |
| TMX2        | 51075   | thioredoxin-related transmembrane protein 2 isoform 1 precursor                              | NP_057043.1       | 2          | 3                 | 3          | 5      | 1.11                                                     | 1.25                                                     | 7.91                                                                                   | 23.4                                                                                   | 17.8                                                                                          | 63.7                                                                                          | 4                                                                              | 4                                                                              | 7159    | 51075          | None                                                                                                            | Molecular function unknown                   | -                     | Integral membrane protein           | Biological process unknown                                                   | TM;SP                      | No                       |
| SMPD4       | 55627   | sphingomyelin phosphodiesterase 4 isoform 2                                                  | NP_060421.2       | 3          | 6                 | 6          | 10     | 1.11                                                     | 1.24                                                     | 3.13                                                                                   | 6.36                                                                                   | 8.5                                                                                           | 19.5                                                                                          | 6                                                                              | 6                                                                              | 13374   | 55627          | None                                                                                                            | Molecular function unknown                   | Endoplasmic reticulum | Integral membrane protein           | Biological process unknown                                                   | TM                         | Yes                      |
| TBC1D4      | 9882    | TBC1 domain family member 4 isoform 3                                                        | NP_001273588.1    | 3          | 3                 | 3          | 5      | 1.11                                                     | 1.24                                                     | 0.88                                                                                   | 0.81                                                                                   | 1.4                                                                                           | 1.4                                                                                           | 2                                                                              | 2                                                                              | 18164   | 9882           | TBC1 domain family, member 4                                                                                    | GTPase activator activity                    | Nucleus;Cytoplasm     | GTPase activating protein           | Cell communication;Signal transduction                                       | CC;PTB;TBC                 | Yes                      |
| TRIM33      | 51592   | E3 ubiquitin-protein ligase TRIM33 isoform alpha                                             | NP_056990.3       | 2          | 3                 | 3          | 7      | 1.11                                                     | 1.24                                                     | 2.9                                                                                    | 6.48                                                                                   | 5.6                                                                                           | 14                                                                                            | 3                                                                              | 3                                                                              | 10423   | 51592          | tripartite motif-containing 33                                                                                  | Transcription regulator activity             | Nucleus               | Transcription regulatory protein    | Regulation of nucleobase, nucleoside, nucleotide and nucleic acid metabolism | RING;BBOX;BBC;CC;PHD;BROMO | Yes                      |
| NOL11       | 25926   | nucleolar protein 11 isoform 1                                                               | NP_056277.2       | 5          | 6                 | 6          | 18     | 1.11                                                     | 1.23                                                     | 6.28                                                                                   | 0.71                                                                                   | 21.2                                                                                          | 2.5                                                                                           | 9                                                                              | 8                                                                              | 10900   | 25926          | None                                                                                                            | Molecular function unknown                   | Nucleolus             | Unclassified                        | Biological process unknown                                                   | -                          | No                       |
| FAU         | 2197    | ubiquitin-like protein fubi and ribosomal protein S30 precursor                              | NP_001988.1       | 1          | 3                 | 3          | 13     | 1.11                                                     | 1.23                                                     | 5.7                                                                                    | 5.76                                                                                   | 19.2                                                                                          | 21.4                                                                                          | 9                                                                              | 9                                                                              | 2       | 2197           | Finkel-Biskis-Reilly murine sarcoma virus(FBR-MuSV) ubiquitously expressed (fox derived); ribosomal protein S30 | Ubiquitin-specific protease activity         | Ribosome              | Ubiquitin proteasome system protein | Protein metabolism                                                           | UBQ;NLS                    | Yes                      |
| RPF1        | 80135   | ribosome production factor 1                                                                 | NP_079341.2       | 1          | 2                 | 2          | 3      | 1.11                                                     | 1.21                                                     | 1.21                                                                                   | 1.21                                                                                   | 1.21                                                                                          | 1.21                                                                                          | 1                                                                              | 1                                                                              | 15272   | 80135          | brix domain containing 5                                                                                        | Molecular function unknown                   | Nucleolus             | Unclassified                        | Regulation of nucleobase, nucleoside, nucleotide and nucleic acid metabolism | -                          | No                       |
| NUP88       | 4927    | nuclear pore complex protein Nup88                                                           | NP_002523.2       | 1          | 13                | 13         | 27     | 1.11                                                     | 1.2                                                      | 3.7                                                                                    | 4.83                                                                                   | 15.4                                                                                          | 21.9                                                                                          | 14                                                                             | 14                                                                             | 3974    | 4927           | nucleoporin 88kDa                                                                                               | Transporter activity                         | Nucleus               | Transport/cargo protein             | Transport                                                                    | CC                         | Yes                      |
| TWF2        | 11344   | twinstin-2                                                                                   | NP_009215.1       | 1          | 10                | 11         | 31     | 1.11                                                     | 1.2                                                      | 5.85                                                                                   | 8.71                                                                                   | 26.4                                                                                          | 45                                                                                            | 16                                                                             | 17                                                                             | 8464    | 11344          | PTKOL protein tyrosine kinase 9-like(A6-related protein)                                                        | Protein-tyrosine kinase activity             | Cytoplasm             | Tyrosine kinase                     | Cell communication;Signal transduction                                       | ADF;CC                     | Yes                      |
| CDK12       | 51755   | cyclin-dependent kinase 12 isoform 1                                                         | NP_057591.2       | 47         | 6                 | 7          | 24     | 1.11                                                     | 1.19                                                     | 12.94                                                                                  | 3.29                                                                                   | 29.3                                                                                          | 7.8                                                                                           | 4                                                                              | 4                                                                              | 10849   | 51755          | None                                                                                                            | Protein serine/threonine kinase activity     | Nucleus               | Serine/threonine kinase             | Cell communication;Signal transduction                                       | S_T_kinase                 | Yes                      |
| CCT3        | 7203    | T-complex protein 1 subunit gamma isoform a                                                  | NP_005989.3       | 3          | 30                | 31         | 195    | 1.11                                                     | 1.19                                                     | 2.53                                                                                   | 3.13                                                                                   | 26.7                                                                                          | 35.8                                                                                          | 87                                                                             | 87                                                                             | 8969    | 7203           | chaperonin containing TCP1, subunit 3 (gamma)                                                                   | Chaperone activity                           | Cytoplasm             | Chaperone                           | Protein metabolism                                                           | -                          | Yes                      |
| RRP1B       | 23076   | ribosomal RNA processing protein 1 homolog B                                                 | NP_055871.1       | 1          | 11                | 11         | 22     | 1.11                                                     | 1.18                                                     | 3.35                                                                                   | 4.85                                                                                   | 13                                                                                            | 20.8                                                                                          | 12                                                                             | 13                                                                             | 10009   | 23076          | KIAA0179                                                                                                        | Molecular function unknown                   | Nucleolus             | Unclassified                        | Biological process unknown                                                   | -                          | Yes                      |
| SDC4        | 6385    | syndecan-4 precursor                                                                         | NP_002990.2       | 1          | 5                 | 5          | 10     | 1.11                                                     | 1.17                                                     | 12.41                                                                                  | 7.86                                                                                   | 31.7                                                                                          | 20.8                                                                                          | 5                                                                              | 5                                                                              | 8366    | 6385           | syndecan 4 (amphiglycan, ryadocan)                                                                              | Receptor activity                            | Plasma membrane       | Cell surface receptor               | Cell communication;Signal transduction                                       | SP;TM;Band 4.1             | Yes                      |
| CD2AP       | 23607   | CD2-associated protein                                                                       | NP_036252.1       | 1          | 15                | 15         | 42     | 1.11                                                     | 1.17                                                     | 1.89                                                                                   | 2.72                                                                                   | 9.9                                                                                           | 15                                                                                            | 22                                                                             | 22                                                                             | 5026    | 23607          | CD2-associated protein                                                                                          | Receptor signaling complex scaffold activity | Cytoplasm             | Adapter molecule                    | Cell communication;Signal transduction                                       | SH3;CC                     | Yes                      |
| PSAT1       | 29968   | phosphoserine aminotransferase isoform 1                                                     | NP_478059.1       | 2          | 14                | 14         | 60     | 1.11                                                     | 1.16                                                     | 3.88                                                                                   | 4.25                                                                                   | 24.7                                                                                          | 28.4                                                                                          | 32                                                                             | 32                                                                             | 17918   | 29968          | phosphoserine aminotransferase 1                                                                                | Transaminase activity                        | Cytosol               | Enzyme: Aminotransferase            | Metabolism;Energy pathways                                                   | -                          | Yes                      |
| HOOK3       | 84376   | protein Hook homolog 3                                                                       | NP_115786.1       | 1          | 8                 | 8          | 12     | 1.11                                                     | 1.16                                                     | 3.18                                                                                   | 8.23                                                                                   | 9.3                                                                                           | 25.6                                                                                          | 7                                                                              | 7                                                                              | 9699    | 84376          | hook homolog 3 (Drosophila)                                                                                     | Cytoskeletal protein binding                 | Cytoplasm             | Cytoskeletal associated protein     | Cell growth and/or maintenance                                               | CC                         | Yes                      |
| HNRNPM      | 4670    | heterogeneous nuclear ribonucleoprotein M isoform a                                          | NP_005959.2       | 3          | 31                | 31         | 141    | 1.11                                                     | 1.16                                                     | 2.06                                                                                   | 3.99                                                                                   | 20                                                                                            | 41.9                                                                                          | 75                                                                             | 75                                                                             | 1188    | 4670           | heterogeneous nuclear ribonucleoprotein M                                                                       | Ribonucleoprotein                            | Nucleolus;Nucleus     | Ribonucleoprotein                   | Regulation of nucleobase, nucleoside, nucleotide and nucleic acid metabolism | RRM                        | Yes                      |
| PRDX1       | 5052    | peroxiredoxin-1                                                                              | NP_859048.1       | 1          | 12                | 15         | 68     | 1.11                                                     | 1.14                                                     | 5.36                                                                                   | 5.32                                                                                   | 34.8                                                                                          | 35.4                                                                                          | 32                                                                             | 32                                                                             | 1458    | 5052           | peroxiredoxin 1                                                                                                 | Peroxidase activity                          | Cytoplasm             | Enzyme: Peroxidase                  | Metabolism;Energy pathways                                                   | -                          | Yes                      |



Supplementary Table S1. List of quantified proteins in OKF6/TERT1-Smoke cells  
 Raignanalan *et al.*, 2017. Role of protein kinase N2 (PKN2) in cigarette smoke-mediated oncogenic transformation of oral cells

| Gene Symbol | Gene ID | Protein Description                                                               | Protein Accession | # Proteins | # Unique Peptides | # Peptides | # PSMs | OKF6/TERT1-Smoke/<br>OKF6/TERT1-Parental<br>(130/126) R1 | OKF6/TERT1-Smoke/<br>OKF6/TERT1-Parental<br>(128/127) R2 | Ratio Standard Errors [%]:<br>OKF6/TERT1-Smoke/<br>OKF6/TERT1-Parental<br>(130/126) R1 | Ratio Standard Errors [%]:<br>OKF6/TERT1-Smoke/<br>OKF6/TERT1-Parental<br>(128/127) R2 | Ratio Variabilities [%]:<br>F13: OKF6/TERT1-<br>Smoke/<br>OKF6/TERT1-Parental<br>(130/126) R1 | Ratio Variabilities [%]:<br>F13: OKF6/TERT1-<br>Smoke/<br>OKF6/TERT1-Parental<br>(128/127) R2 | Ratio Counts: F13:<br>OKF6/TERT1-Smoke/<br>OKF6/TERT1-Parental<br>(130/126) R1 | Ratio Counts: F13:<br>OKF6/TERT1-Smoke/<br>OKF6/TERT1-Parental<br>(128/127) R2 | HPFD ID | Entrez Gene Id | Gene Name                                                         | Molecular Function                                              | Primary Localization  | Molecular Class                     | Biological Process                                                                                     | Domains                  | Plasma Proteome Database |
|-------------|---------|-----------------------------------------------------------------------------------|-------------------|------------|-------------------|------------|--------|----------------------------------------------------------|----------------------------------------------------------|----------------------------------------------------------------------------------------|----------------------------------------------------------------------------------------|-----------------------------------------------------------------------------------------------|-----------------------------------------------------------------------------------------------|--------------------------------------------------------------------------------|--------------------------------------------------------------------------------|---------|----------------|-------------------------------------------------------------------|-----------------------------------------------------------------|-----------------------|-------------------------------------|--------------------------------------------------------------------------------------------------------|--------------------------|--------------------------|
| PDCD11      | 22984   | protein RRP5 homolog                                                              | NP_055791.1       | 1          | 19                | 19         | 42     | 1.11                                                     | 0.95                                                     | 3.47                                                                                   | 2.98                                                                                   | 18.2                                                                                          | 13.3                                                                                          | 22                                                                             | 22                                                                             | 18752   | 22984          | Programmed cell death 11                                          | Transcription factor binding                                    | Nucleus               | Transcription regulatory protein    | Apoptosis                                                                                              | S1,CC,HAT                | Yes                      |
| MRPL2       | 51069   | 39S ribosomal protein L2, mitochondrial isoform 1                                 | NP_057034.2       | 2          | 5                 | 5          | 14     | 1.11                                                     | 0.94                                                     | 8.71                                                                                   | 11.82                                                                                  | 25.9                                                                                          | 30.1                                                                                          | 7                                                                              | 7                                                                              | 14745   | 51069          | mitochondrial ribosomal protein L2                                | Structural constituent of ribosome                              | Mitochondrion         | Ribosomal subunit                   | Protein metabolism                                                                                     | SP                       | No                       |
| SOD3        | 6649    | extracellular superoxide dismutase [Cu-Zn] precursor                              | NP_003093.2       | 1          | 1                 | 1          | 4      | 1.11                                                     | 0.94                                                     | 14.65                                                                                  | 3.29                                                                                   | 23.2                                                                                          | 4.4                                                                                           | 2                                                                              | 2                                                                              | 1708    | 6649           | superoxide dismutase 3, extracellular                             | Superoxide dismutase activity                                   | Extracellular         | Enzyme: Superoxide dismutase        | Metabolism;Energy pathways                                                                             | SP                       | Yes                      |
| ACSL1       | 2180    | long-chain-fatty-acid-CoA ligase 1 isoform a                                      | NP_001986.2       | 4          | 1                 | 1          | 1      | 1.11                                                     | 0.94                                                     |                                                                                        |                                                                                        |                                                                                               |                                                                                               | 1                                                                              | 1                                                                              | 1068    | 2180           | acyl-CoA synthetase long-chain family member 1                    | Ligase activity                                                 | Endoplasmic reticulum | Enzyme: Ligase                      | Metabolism;Energy pathways                                                                             | TM                       | Yes                      |
| SEC61A1     | 29927   | protein transport protein Sec61 subunit alpha isoform 1                           | NP_037468.1       | 4          | 6                 | 6          | 13     | 1.11                                                     | 0.93                                                     | 1.4                                                                                    | 8.98                                                                                   | 3.8                                                                                           | 20.7                                                                                          | 6                                                                              | 6                                                                              | 15316   | 29927          | Sec61 alpha 1 subunit (S. cerevisiae)                             | Protein translocase activity;Intracellular transporter activity | Endoplasmic reticulum | Integral membrane protein           | Transport                                                                                              | TM                       | No                       |
| MRPL19      | 9801    | 39S ribosomal protein L19, mitochondrial                                          | NP_055578.2       | 1          | 6                 | 6          | 13     | 1.11                                                     | 0.92                                                     | 12.37                                                                                  | 3.41                                                                                   | 37.5                                                                                          | 8.4                                                                                           | 7                                                                              | 7                                                                              | 11370   | 9801           | mitochondrial ribosomal protein L19                               | Structural constituent of ribosome                              | Mitochondrion         | Ribosomal subunit                   | Protein metabolism                                                                                     | -                        | Yes                      |
| CUL2        | 8453    | cullin-2 isoform a                                                                | NP_001185707.1    | 3          | 14                | 14         | 26     | 1.11                                                     | 0.91                                                     | 3.2                                                                                    | 5.88                                                                                   | 13.8                                                                                          | 21                                                                                            | 15                                                                             | 15                                                                             | 6786    | 8453           | cullin 2                                                          | Ubiquitin binding                                               | Cytoplasm             | Ubiquitin proteasome system protein | Protein metabolism                                                                                     | CULL                     | Yes                      |
| WASF1       | 8936    | wiskott-Aldrich syndrome protein family member 1                                  | NP_003922.1       | 1          | 1                 | 1          | 2      | 1.11                                                     | 0.9                                                      |                                                                                        |                                                                                        |                                                                                               |                                                                                               | 1                                                                              | 1                                                                              | 5434    | 8936           | WAS protein family, member 1                                      | Receptor signaling complex scaffold activity                    | Cytoplasm             | Adapter molecule                    | Cell communication;Signal transduction                                                                 | WH2                      | Yes                      |
| SNRPD3      | 6634    | small nuclear ribonucleoprotein Sm D3                                             | NP_004166.1       | 1          | 4                 | 4          | 25     | 1.11                                                     | 0.89                                                     | 9.02                                                                                   | 28.11                                                                                  | 30.7                                                                                          | 87.1                                                                                          | 9                                                                              | 9                                                                              | 3039    | 6634           | small nuclear ribonucleoprotein D3 polypeptide18kDa               | RNA binding                                                     | Nucleus               | RNA binding protein                 | Regulation of nucleobase, nucleoside, nucleotide and nucleic acid metabolism                           | SM                       | Yes                      |
| ARFIP1      | 27236   | arfaptin-1 isoform 1                                                              | NP_001274360.1    | 2          | 9                 | 10         | 21     | 1.11                                                     | 0.87                                                     | 3.96                                                                                   | 13.63                                                                                  | 14                                                                                            | 38.8                                                                                          | 10                                                                             | 10                                                                             | 9331    | 27236          | ADP-ribosylation factor interacting protein 1 (arfaptin 1)        | Regulator of G-protein signaling activity                       | Cytoplasm             | Unclassified                        | Signal transduction                                                                                    | CC                       | Yes                      |
| FXR1        | 8087    | fragile X mental retardation syndrome related protein 1 isoform a                 | NP_005078.2       | 3          | 13                | 15         | 34     | 1.11                                                     | 0.86                                                     | 3.98                                                                                   | 4.1                                                                                    | 18.4                                                                                          | 14.7                                                                                          | 17                                                                             | 17                                                                             | 2892    | 8087           | fragile X mental retardation, autosomal homolog 1                 | RNA binding                                                     | Nucleolus             | RNA binding protein                 | Regulation of nucleobase, nucleoside, nucleotide and nucleic acid metabolism;Regulation of translation | NES,KH                   | Yes                      |
| LARS2       | 23395   | probable leucine-tRNA ligase, mitochondrial                                       | NP_056155.1       | 3          | 8                 | 8          | 16     | 1.11                                                     | 0.86                                                     | 3.42                                                                                   | 3.63                                                                                   | 10.1                                                                                          | 8.2                                                                                           | 7                                                                              | 7                                                                              | 5178    | 23395          | leucyl-tRNA synthetase 2, mitochondrial                           | Transferase activity                                            | Mitochondrion         | Enzyme: Transferase                 | Metabolism;Energy pathways                                                                             | SP                       | Yes                      |
| UQCRCF1     | 7386    | cytochrome b-c1 complex subunit Rieske, mitochondrial                             | NP_005994.2       | 1          | 9                 | 9          | 23     | 1.11                                                     | 0.83                                                     | 6.37                                                                                   | 17.97                                                                                  | 25.9                                                                                          | 57.8                                                                                          | 13                                                                             | 13                                                                             | 1874    | 7386           | ubiquinol-cytochrome c reductase, Rieskeiron-sulfur polypeptide 1 | Catalytic activity                                              | Mitochondrion         | Enzyme: Reductase                   | Metabolism;Energy pathways                                                                             | TM                       | No                       |
| HMGN4       | 10473   | high mobility group nucleosome-binding domain-containing protein 4                | NP_006344.1       | 1          | 4                 | 4          | 5      | 1.11                                                     | 0.82                                                     | 21.17                                                                                  | 31.42                                                                                  | 49.9                                                                                          | 55.1                                                                                          | 4                                                                              | 4                                                                              | 17111   | 10473          | high mobility group nucleosome-binding domain4                    | Transcription regulator activity                                | Nucleus               | Transcription regulatory protein    | Regulation of nucleobase, nucleoside, nucleotide and nucleic acid metabolism                           | -                        | Yes                      |
| RAB5A       | 5868    | ras-related protein Rab-5A isoform 1                                              | NP_004153.2       | 2          | 5                 | 8          | 53     | 1.11                                                     | 0.81                                                     | 11.56                                                                                  | 8.31                                                                                   | 44.6                                                                                          | 22.7                                                                                          | 11                                                                             | 11                                                                             | 1542    | 5868           | RAB5A, member RAS oncogene family                                 | GTPase activity                                                 | Plasma membrane       | GTPase                              | Cell communication;Signal transduction                                                                 | RAB                      | Yes                      |
| PUF60       | 22827   | poly(U)-binding-splicing factor PUF60 isoform a                                   | NP_510965.1       | 4          | 1                 | 14         | 64     | 1.11                                                     | 0.81                                                     |                                                                                        |                                                                                        |                                                                                               |                                                                                               | 1                                                                              | 1                                                                              | 18051   | 22827          | None                                                              | RNA binding                                                     | Nucleus               | RNA binding protein                 | Regulation of nucleobase, nucleoside, nucleotide and nucleic acid metabolism                           | RRM                      | Yes                      |
| LSM3        | 27258   | U6 snRNA-associated Sm-like protein LSM3                                          | NP_055278.1       | 1          | 2                 | 2          | 3      | 1.11                                                     | 0.7                                                      | 19.86                                                                                  | 7.38                                                                                   | 32.1                                                                                          | 7.3                                                                                           | 2                                                                              | 2                                                                              | 6283    | 27258          | LSM3 homolog, U6 small nuclear RNA associated(S. cerevisiae)      | RNA binding                                                     | Cytoplasm             | RNA binding protein                 | Regulation of nucleobase, nucleoside, nucleotide and nucleic acid metabolism                           | SM                       | Yes                      |
| SCAMP2      | 10066   | secretory carrier associated membrane protein 2                                   | NP_005688.2       | 1          | 3                 | 3          | 7      | 1.11                                                     | 0.65                                                     | 9.8                                                                                    | 18.38                                                                                  | 22.1                                                                                          | 24.3                                                                                          | 4                                                                              | 4                                                                              | 6073    | 10066          | secretory carrier membrane protein 2                              | Auxiliary transport protein activity                            | Plasma membrane       | Membrane transport protein          | Transport                                                                                              | TM,CC                    | No                       |
| WASL        | 8976    | neural Wiskott-Aldrich syndrome protein                                           | NP_003932.3       | 1          | 3                 | 3          | 7      | 1.11                                                     | 0.64                                                     | 34.16                                                                                  | 55.28                                                                                  | 73.2                                                                                          | 68                                                                                            | 3                                                                              | 3                                                                              | 5448    | 8976           | Wiskott-Aldrich syndrome-like                                     | Cytoskeletal protein binding                                    | Cytoplasm             | Cytoskeletal associated protein     | Cell growth and/or maintenance                                                                         | WH1,PBD,WH2              | Yes                      |
| RALA        | 5898    | ras-related protein Ral-A precursor                                               | NP_005393.2       | 1          | 4                 | 5          | 24     | 1.11                                                     | 0.58                                                     | 10.76                                                                                  | 7.18                                                                                   | 43.4                                                                                          | 14.6                                                                                          | 12                                                                             | 12                                                                             | 1549    | 5898           | v-ral simian leukemia viral oncogene homolog (Atras related)      | GTPase activity                                                 | Plasma membrane       | GTPase                              | Cell communication;Signal transduction                                                                 | RAS                      | Yes                      |
| HTRA1       | 5654    | serine protease HTRA1 precursor                                                   | NP_002766.1       | 1          | 17                | 17         | 40     | 1.1                                                      | 1.42                                                     | 6.43                                                                                   | 4.43                                                                                   | 31.6                                                                                          | 28                                                                                            | 19                                                                             | 19                                                                             | 3725    | 5654           | protease, serine, 11 (KGF binding)                                | Serine-type peptidase activity                                  | Extracellular         | Serine protease                     | Protein metabolism                                                                                     | IB,KAZAL,TRYP SIN,PDZ,SP | Yes                      |
| OGFOD3      | 79701   | 2-oxoglutarate and iron-dependent oxygenase domain-containing protein 3 isoform 2 | NP_787098.3       | 2          | 1                 | 1          | 2      | 1.1                                                      | 1.4                                                      |                                                                                        |                                                                                        |                                                                                               |                                                                                               | 1                                                                              | 1                                                                              |         |                |                                                                   |                                                                 |                       |                                     |                                                                                                        |                          |                          |
| GCA         | 25801   | granulein                                                                         | NP_036330.1       | 1          | 1                 | 1          | 2      | 1.1                                                      | 1.38                                                     |                                                                                        |                                                                                        |                                                                                               |                                                                                               | 1                                                                              | 1                                                                              | 6122    | 25801          | granulein, EF-hand calcium binding protein                        | Calcium ion binding                                             | Cytoplasm             | Calcium binding protein             | Cell communication;Signal transduction                                                                 | SP,EF                    | Yes                      |
| HSPD1       | 3329    | 60 kDa heat shock protein, mitochondrial                                          | NP_002147.2       | 1          | 37                | 37         | 257    | 1.1                                                      | 1.38                                                     | 2.16                                                                                   | 2.56                                                                                   | 27.1                                                                                          | 41.8                                                                                          | 127                                                                            | 128                                                                            | 318     | 3329           | heat shock 60kDa protein 1 (chaperonin)                           | Heat shock protein activity                                     | Mitochondrial matrix  | Heat shock protein                  | Protein metabolism;Protein folding;Apoptosis;Regulation of immune response;Signal transduction         | CC                       | Yes                      |

Supplementary Table S1. List of quantified proteins in OKF6/TERT1-Smoke cells  
 Raingopaln *et al.*, 2017. Role of protein kinase N2 (PKN2) in cigarette smoke-mediated oncogenic transformation of oral cells

| Gene Symbol | Gene ID | Protein Description                                                                   | Protein Accession | # Proteins | # Unique Peptides | # Peptides | # PSMs | OKF6/TERT1-Smoke/<br>OKF6/TERT1-Parental<br>(130/126) R1 | OKF6/TERT1-Smoke/<br>OKF6/TERT1-Parental<br>(128/127) R2 | Ratio Standard Errors [%]:<br>OKF6/TERT1-Smoke/<br>OKF6/TERT1-Parental<br>(130/126) R1 | Ratio Standard Errors [%]:<br>OKF6/TERT1-Smoke/<br>OKF6/TERT1-Parental<br>(128/127) R2 | Ratio Variabilities [%]:<br>F13: OKF6/TERT1-<br>Smoke/<br>OKF6/TERT1-Parental<br>(130/126) R1 | Ratio Variabilities [%]:<br>F13: OKF6/TERT1-<br>Smoke/<br>OKF6/TERT1-Parental<br>(128/127) R2 | Ratio Counts: F13:<br>OKF6/TERT1-Smoke/<br>OKF6/TERT1-Parental<br>(130/126) R1 | Ratio Counts: F13:<br>OKF6/TERT1-Smoke/<br>OKF6/TERT1-Parental<br>(128/127) R2 | HPRD ID | Entrez Gene Id | Gene Name                                                                                  | Molecular Function                       | Primary Localization              | Molecular Class                     | Biological Process                                                           | Domains               | Plasma Proteome Database |
|-------------|---------|---------------------------------------------------------------------------------------|-------------------|------------|-------------------|------------|--------|----------------------------------------------------------|----------------------------------------------------------|----------------------------------------------------------------------------------------|----------------------------------------------------------------------------------------|-----------------------------------------------------------------------------------------------|-----------------------------------------------------------------------------------------------|--------------------------------------------------------------------------------|--------------------------------------------------------------------------------|---------|----------------|--------------------------------------------------------------------------------------------|------------------------------------------|-----------------------------------|-------------------------------------|------------------------------------------------------------------------------|-----------------------|--------------------------|
| PSMD7       | 5713    | 26S proteasome non-ATPase regulatory subunit 7                                        | NP_002802.2       | 1          | 11                | 11         | 34     | 1.1                                                      | 1.37                                                     | 3.38                                                                                   | 5.12                                                                                   | 15.9                                                                                          | 32.2                                                                                          | 18                                                                             | 20                                                                             | 1147    | 5713           | proteasome (prosome, macropain) 26S subunit, non-ATPase, 7 (Mov34 homolog)                 | Ubiquitin-specific protease activity     | Nucleus                           | Ubiquitin proteasome system protein | Protein metabolism                                                           | JAB                   | Yes                      |
| EIF2S1      | 1965    | eukaryotic translation initiation factor 2 subunit 1                                  | NP_004085.1       | 1          | 22                | 22         | 80     | 1.1                                                      | 1.36                                                     | 3.75                                                                                   | 3.62                                                                                   | 27                                                                                            | 32.4                                                                                          | 41                                                                             | 41                                                                             | 4881    | 1965           | eukaryotic translation initiation factor 2 subunit 1 alpha, 35kDa                          | Translation regulator activity           | Cytoplasm                         | Translation regulatory protein      | Protein metabolism                                                           | S1,CC                 | Yes                      |
| CSNK2A2     | 1459    | casein kinase II subunit alpha'                                                       | NP_001887.1       | 1          | 8                 | 10         | 19     | 1.1                                                      | 1.36                                                     | 7.93                                                                                   | 9.21                                                                                   | 26.6                                                                                          | 39                                                                                            | 9                                                                              | 9                                                                              | 279     | 1459           | casein kinase 2, alpha prime polypeptide                                                   | Protein serine/threonine kinase activity | Nucleus                           | Serine/threonine kinase             | Cell communication;Signal transduction                                       | S_T_kinase            | Yes                      |
| DDX41       | 51428   | probable ATP-dependent RNA helicase DDX41                                             | NP_057306.2       | 1          | 3                 | 3          | 7      | 1.1                                                      | 1.35                                                     | 8.21                                                                                   | 4.84                                                                                   | 18.2                                                                                          | 13.1                                                                                          | 4                                                                              | 4                                                                              | 10490   | 51428          | DEAD (Asp-Glu-Ala-Asp) box polypeptide 41                                                  | Helicase activity                        | Nucleolus                         | RNA helicase                        | Regulation of nucleobase, nucleoside, nucleotide and nucleic acid metabolism | DEXDc;HELIC;Z NFC2;CC | Yes                      |
| GADD45GIP1  | 90480   | growth arrest and DNA damage-inducible protein-interacting protein 1                  | NP_443082.2       | 1          | 6                 | 6          | 17     | 1.1                                                      | 1.31                                                     | 9.29                                                                                   | 6.18                                                                                   | 29.4                                                                                          | 23.2                                                                                          | 8                                                                              | 8                                                                              | 5519    | 90480          | growth arrest and DNA-damage-inducible gamma interacting protein 1                         | Protein binding                          | Nucleus                           | Cell cycle control protein          | Cell communication;Signal transduction                                       | CC                    | No                       |
| SLC3A2      | 6520    | 4F2 cell-surface antigen heavy chain isoform b                                        | NP_001012680.1    | 4          | 26                | 26         | 150    | 1.1                                                      | 1.28                                                     | 2.56                                                                                   | 1.8                                                                                    | 24.9                                                                                          | 20.4                                                                                          | 77                                                                             | 77                                                                             | 1148    | 6520           | solute carrier family 3 (activators of dibasic and neutral amino acid transport), member 2 | Auxiliary transport protein activity     | Plasma membrane;Nucleus;Cytoplasm | Membrane transport protein          | Transport                                                                    | TM;AMY                | Yes                      |
| ELAVL1      | 1994    | ELAV-like protein 1                                                                   | NP_001410.2       | 9          | 10                | 10         | 42     | 1.1                                                      | 1.28                                                     | 4.48                                                                                   | 4.71                                                                                   | 22.9                                                                                          | 28.1                                                                                          | 21                                                                             | 21                                                                             | 16025   | 1994           | ELAV (embryonic lethal abnormal vision, Drosophila)-like 1 (Hu antigen R)                  | RNA binding                              | Nucleus                           | RNA binding protein                 | Regulation of nucleobase, nucleoside, nucleotide and nucleic acid metabolism | RRM                   | Yes                      |
| C3orf38     | 285237  | uncharacterized protein C3orf38                                                       | NP_776185.2       | 1          | 1                 | 1          | 2      | 1.1                                                      | 1.27                                                     |                                                                                        |                                                                                        |                                                                                               |                                                                                               | 1                                                                              | 1                                                                              | 14509   | 285237         | None                                                                                       | Molecular function unknown               | -                                 | Unclassified                        | Biological process unknown                                                   | -                     | No                       |
| PSME2       | 5721    | proteasome activator complex subunit 2                                                | NP_002809.2       | 1          | 8                 | 8          | 48     | 1.1                                                      | 1.26                                                     | 3.67                                                                                   | 5.67                                                                                   | 18.6                                                                                          | 33.7                                                                                          | 21                                                                             | 21                                                                             | 3697    | 5721           | proteasome (prosome, macropain) activator subunit 2 (PA28 beta)                            | Ubiquitin-specific protease activity     | Cytoplasm                         | Ubiquitin proteasome system protein | Protein metabolism                                                           | -                     | Yes                      |
| KHDRBS1     | 10657   | KH domain-containing, RNA-binding, signal transduction-associated protein 1 isoform 1 | NP_006550.1       | 6          | 9                 | 9          | 32     | 1.1                                                      | 1.25                                                     | 4.86                                                                                   | 3.3                                                                                    | 22.2                                                                                          | 17.1                                                                                          | 17                                                                             | 17                                                                             | 3926    | 10657          | KH domain containing, RNA binding, signal transduction associated 1                        | RNA binding                              | Nucleus                           | RNA binding protein                 | Regulation of nucleobase, nucleoside, nucleotide and nucleic acid metabolism | KH                    | Yes                      |
| PSMC2       | 5701    | 26S protease regulatory subunit 7 isoform 1                                           | NP_002794.1       | 2          | 22                | 22         | 79     | 1.1                                                      | 1.23                                                     | 2.62                                                                                   | 3.8                                                                                    | 18                                                                                            | 29.7                                                                                          | 39                                                                             | 39                                                                             | 1105    | 5701           | proteasome (prosome, macropain) 26S subunit, ATPase, 2                                     | Ubiquitin-specific protease activity     | Cytoplasm                         | Ubiquitin proteasome system protein | Protein metabolism                                                           | AAA;CC                | Yes                      |
| UBA2        | 10054   | SUMO-activating enzyme subunit 2                                                      | NP_005490.1       | 1          | 17                | 17         | 46     | 1.1                                                      | 1.23                                                     | 3.59                                                                                   | 5.03                                                                                   | 18.2                                                                                          | 29                                                                                            | 21                                                                             | 21                                                                             | 11658   | 10054          | None                                                                                       | Ubiquitin-specific protease activity     | -                                 | Ubiquitin proteasome system protein | Protein metabolism                                                           | CC                    | Yes                      |
| AP2A1       | 160     | AP-2 complex subunit alpha-1 isoform 1                                                | NP_055018.2       | 2          | 15                | 23         | 68     | 1.1                                                      | 1.21                                                     | 3.33                                                                                   | 5.82                                                                                   | 18                                                                                            | 35.5                                                                                          | 24                                                                             | 24                                                                             | 3016    | 160            | adaptor-related protein complex 2, alpha 1 subunit                                         | Transporter activity                     | Plasma membrane                   | Transport/cargo protein             | Transport                                                                    | CC                    | Yes                      |
| DNAJC19     | 131118  | mitochondrial import inner membrane translocase subunit TIM14 isoform 1               | NP_660304.1       | 2          | 2                 | 2          | 7      | 1.1                                                      | 1.19                                                     | 7.53                                                                                   | 6.55                                                                                   | 16.7                                                                                          | 15.7                                                                                          | 4                                                                              | 4                                                                              | 12349   | 131118         | None                                                                                       | Protein translocase activity             | Mitochondrial membrane            | Enzyme: Translocase                 | Mitochondrial transport                                                      | TM;DNAJ               | No                       |
| NOL7        | 51406   | nucleolar protein 7                                                                   | NP_057251.2       | 1          | 5                 | 5          | 9      | 1.1                                                      | 1.19                                                     | 4.5                                                                                    | 9.6                                                                                    | 12.2                                                                                          | 28.4                                                                                          | 6                                                                              | 6                                                                              | 17641   | 51406          | nucleolar protein 7, 27kDa                                                                 | Molecular function unknown               | Nucleolus                         | Unclassified                        | Biological process unknown                                                   | CC                    | No                       |
| ECHS1       | 1892    | enoyl-CoA hydratase, mitochondrial                                                    | NP_004083.3       | 1          | 5                 | 5          | 11     | 1.1                                                      | 1.18                                                     | 7.37                                                                                   | 11.47                                                                                  | 21.7                                                                                          | 36.8                                                                                          | 7                                                                              | 7                                                                              | 3799    | 1892           | enoyl Coenzyme A hydratase, short chain, 1, mitochondrial                                  | Catalytic activity                       | Mitochondrion                     | Enzyme: Hydratase                   | Metabolism;Energy pathways                                                   | SP                    | Yes                      |
| PSMD2       | 5708    | 26S proteasome non-ATPase regulatory subunit 2 isoform 1                              | NP_002799.3       | 3          | 30                | 30         | 86     | 1.1                                                      | 1.17                                                     | 3.62                                                                                   | 4.15                                                                                   | 29                                                                                            | 35.6                                                                                          | 51                                                                             | 51                                                                             | 5870    | 5708           | proteasome (prosome, macropain) 26S subunit, non-ATPase, 2                                 | Ubiquitin-specific protease activity     | Cytoplasm                         | Ubiquitin proteasome system protein | Protein metabolism                                                           | CC                    | Yes                      |
| MATR3       | 9782    | matrin-3 isoform a                                                                    | NP_954659.1       | 3          | 22                | 23         | 116    | 1.1                                                      | 1.16                                                     | 3.27                                                                                   | 2.81                                                                                   | 27.4                                                                                          | 25                                                                                            | 56                                                                             | 57                                                                             | 5270    | 9782           | matrin 3                                                                                   | RNA binding                              | Nucleus                           | RNA binding protein                 | Regulation of nucleobase, nucleoside, nucleotide and nucleic acid metabolism | RRM;CC                | Yes                      |
| DNAJC8      | 22826   | dnaJ homolog subfamily C member 8                                                     | NP_055095.2       | 1          | 10                | 10         | 16     | 1.1                                                      | 1.15                                                     | 8.91                                                                                   | 8.61                                                                                   | 33.2                                                                                          | 33.6                                                                                          | 11                                                                             | 11                                                                             | 13236   | 22826          | DnaJ (Hsp40) homolog, subfamily C, member 8                                                | Chaperone activity                       | Nucleolus                         | Chaperone                           | Protein metabolism                                                           | DNAJ;CC               | Yes                      |
| ID1         | 3422    | isopentenyl-diphosphate Delta-isomerase 1                                             | NP_004499.2       | 2          | 8                 | 8          | 38     | 1.1                                                      | 1.15                                                     | 5.38                                                                                   | 9.15                                                                                   | 27                                                                                            | 49.8                                                                                          | 20                                                                             | 20                                                                             | 7235    | 3422           | isopentenyl-diphosphate delta isomerase                                                    | Isomerase activity                       | Peroxisome                        | Enzyme: Isomerase                   | Metabolism;Energy pathways                                                   | -                     | Yes                      |
| PABPC1      | 26986   | polyadenylate-binding protein 1                                                       | NP_002559.2       | 4          | 21                | 31         | 132    | 1.1                                                      | 1.15                                                     | 3.41                                                                                   | 2.85                                                                                   | 21.5                                                                                          | 18.7                                                                                          | 32                                                                             | 32                                                                             | 5247    | 26986          | poly(A) binding protein, cytoplasmic 1                                                     | RNA binding                              | Cytoplasm                         | RNA binding protein                 | Regulation of nucleobase, nucleoside, nucleotide and nucleic acid metabolism | RRM                   | Yes                      |
| VPRBP       | 9730    | protein VPRBP isoform 1                                                               | NP_055518.1       | 2          | 5                 | 5          | 6      | 1.1                                                      | 1.14                                                     | 3.26                                                                                   | 0.47                                                                                   | 6.2                                                                                           | 0.9                                                                                           | 3                                                                              | 3                                                                              | 11674   | 9730           | None                                                                                       | Molecular function unknown               | Cytoplasm                         | Unclassified                        | Biological process unknown                                                   | LISHCC                | Yes                      |







Supplementary Table S1. List of quantified proteins in OKF6/TERT1-Smoke cells  
 Raigopaln *et al.*, 2017. Role of protein kinase N2 (PKN2) in cigarette smoke-mediated oncogenic transformation of oral cells

| Gene Symbol | Gene ID | Protein Description                                                        | Protein Accession | # Proteins | # Unique Peptides | # Peptides | # PSMs | OKF6/TERT1-Smoke/<br>OKF6/TERT1-Parental<br>(130/126) R1 | OKF6/TERT1-Smoke/<br>OKF6/TERT1-Parental<br>(128/127) R2 | Ratio Standard Errors [%]:<br>OKF6/TERT1-Smoke/<br>OKF6/TERT1-Parental<br>(130/126) R1 | Ratio Standard Errors [%]:<br>OKF6/TERT1-Smoke/<br>OKF6/TERT1-Parental<br>(128/127) R2 | Ratio Variabilities [%]:<br>F13: OKF6/TERT1-<br>Smoke/<br>OKF6/TERT1-Parental<br>(130/126) R1 | Ratio Variabilities [%]:<br>F13: OKF6/TERT1-<br>Smoke/<br>OKF6/TERT1-Parental<br>(128/127) R2 | Ratio Counts: F13:<br>OKF6/TERT1-Smoke/<br>OKF6/TERT1-Parental<br>(130/126) R1 | Ratio Counts: F13:<br>OKF6/TERT1-Smoke/<br>OKF6/TERT1-Parental<br>(128/127) R2 | HFPR ID | Entrez Gene Id | Gene Name                                                                      | Molecular Function                            | Primary Localization        | Molecular Class                     | Biological Process                                                           | Domains          | Plasma Proteome Database |
|-------------|---------|----------------------------------------------------------------------------|-------------------|------------|-------------------|------------|--------|----------------------------------------------------------|----------------------------------------------------------|----------------------------------------------------------------------------------------|----------------------------------------------------------------------------------------|-----------------------------------------------------------------------------------------------|-----------------------------------------------------------------------------------------------|--------------------------------------------------------------------------------|--------------------------------------------------------------------------------|---------|----------------|--------------------------------------------------------------------------------|-----------------------------------------------|-----------------------------|-------------------------------------|------------------------------------------------------------------------------|------------------|--------------------------|
| YTHDC1      | 91746   | YTH domain-containing protein 1 isoform 1                                  | NP_001026902.1    | 2          | 4                 | 4          | 7      | 1.09                                                     | 1.04                                                     | 3.05                                                                                   | 5.62                                                                                   | 6.6                                                                                           | 11.7                                                                                          | 4                                                                              | 4                                                                              | 11689   | 91746          | None                                                                           | RNA binding                                   | Nucleus/Cytoplasm           | RNA binding protein                 | Regulation of nucleobase, nucleoside, nucleotide and nucleic acid metabolism | CC               | Yes                      |
| DIS3        | 22894   | exosome complex exonuclease RRP44 isoform a                                | NP_055768.3       | 2          | 17                | 17         | 38     | 1.09                                                     | 1.03                                                     | 6.66                                                                                   | 3.82                                                                                   | 32.3                                                                                          | 17.3                                                                                          | 19                                                                             | 19                                                                             | 6338    | 22894          | KIAA1008                                                                       | RNA binding                                   | Nucleus                     | RNA binding protein                 | Regulation of nucleobase, nucleoside, nucleotide and nucleic acid metabolism | PI3c             | Yes                      |
| SUPT16H     | 11198   | FACT complex subunit SPT16                                                 | NP_009123.1       | 1          | 25                | 25         | 60     | 1.09                                                     | 1.03                                                     | 3.06                                                                                   | 3.45                                                                                   | 19.6                                                                                          | 21                                                                                            | 34                                                                             | 34                                                                             | 16088   | 11198          | suppressor of Ty 16 homolog (S. cerevisiae)                                    | Transcription factor activity                 | Nucleus                     | Transcription factor                | Regulation of nucleobase, nucleoside, nucleotide and nucleic acid metabolism | CC               | Yes                      |
| TPST1       | 8460    | protein-tyrosine sulfotransferase 1                                        | NP_003587.1       | 1          | 1                 | 1          | 1      | 1.09                                                     | 1.02                                                     |                                                                                        |                                                                                        |                                                                                               |                                                                                               | 1                                                                              | 1                                                                              | 7216    | 8460           | tyrosylprotein sulfotransferase 1                                              | Sulfotransferase activity                     | Golgi apparatus             | Enzyme: Sulfotransferase            | Metabolism/Energy pathways                                                   | TM               | Yes                      |
| MAPK9       | 5601    | mitogen-activated protein kinase 9 isoform alpha2                          | NP_002743.3       | 15         | 3                 | 5          | 9      | 1.09                                                     | 1.02                                                     | 16.44                                                                                  | 11.51                                                                                  | 31.8                                                                                          | 20.5                                                                                          | 3                                                                              | 3                                                                              | 4206    | 5601           | mitogen-activated protein kinase 9                                             | Protein serine/threonine kinase activity      | Nucleus                     | Serine/threonine kinase             | Regulation of cell cycle/Apoptosis/Signal transduction                       | S_T_kinase       | Yes                      |
| MRPS31      | 10240   | 28S ribosomal protein S31, mitochondrial                                   | NP_005821.2       | 1          | 11                | 11         | 31     | 1.09                                                     | 1.02                                                     | 7.1                                                                                    | 10.82                                                                                  | 30.7                                                                                          | 44.9                                                                                          | 15                                                                             | 15                                                                             | 10098   | 10240          | mitochondrial ribosomal protein S31                                            | Structural constituent of ribosome            | Mitochondrion               | Ribosomal subunit                   | Protein metabolism                                                           | CC               | Yes                      |
| POLR2A      | 5430    | DNA-directed RNA polymerase II subunit RPB1                                | NP_000928.1       | 1          | 13                | 13         | 28     | 1.09                                                     | 1                                                        | 2.71                                                                                   | 4.78                                                                                   | 11.5                                                                                          | 18.7                                                                                          | 15                                                                             | 15                                                                             | 8916    | 5430           | polymerase (RNA) II (DNA directed) polypeptideA, 270kDa                        | DNA-directed RNA polymerase activity          | Nucleus                     | RNA polymerase                      | Regulation of nucleobase, nucleoside, nucleotide and nucleic acid metabolism | CC               | Yes                      |
| FBL         | 2091    | rRNA 2'-O-methyltransferase fibrillarin                                    | NP_001427.2       | 1          | 14                | 14         | 47     | 1.09                                                     | 1                                                        | 2.24                                                                                   | 4.37                                                                                   | 13                                                                                            | 23.4                                                                                          | 28                                                                             | 28                                                                             | 617     | 2091           | fibrillarin                                                                    | Ribonucleoprotein                             | Nucleolus                   | Ribonucleoprotein                   | Regulation of nucleobase, nucleoside, nucleotide and nucleic acid metabolism | -                | Yes                      |
| DDX6        | 1656    | probable ATP-dependent RNA helicase DDX6                                   | NP_004388.2       | 7          | 11                | 12         | 56     | 1.09                                                     | 0.99                                                     | 3.34                                                                                   | 6.1                                                                                    | 16.7                                                                                          | 28.2                                                                                          | 21                                                                             | 21                                                                             | 2638    | 1656           | DEAD (Asp-Glu-Ala-Asp) box polypeptide 6                                       | RNA binding                                   | Cytoplasm                   | RNA binding protein                 | Regulation of nucleobase, nucleoside, nucleotide and nucleic acid metabolism | DEXDc;HELIC      | Yes                      |
| GGNBP2      | 79893   | gametogenin-binding protein 2                                              | NP_079111.1       | 1          | 1                 | 1          | 1      | 1.09                                                     | 0.99                                                     |                                                                                        |                                                                                        |                                                                                               |                                                                                               | 1                                                                              | 1                                                                              | 18337   | 79893          | zinc finger protein 403                                                        | DNA binding                                   | Nucleus                     | DNA binding protein                 | Regulation of nucleobase, nucleoside, nucleotide and nucleic acid metabolism | CC               | No                       |
| PSMD1       | 5707    | 26S proteasome non-ATPase regulatory subunit 1 isoform 1                   | NP_002798.2       | 2          | 30                | 30         | 115    | 1.09                                                     | 0.99                                                     | 5.25                                                                                   | 7.3                                                                                    | 45.3                                                                                          | 59.8                                                                                          | 57                                                                             | 58                                                                             | 10169   | 5707           | proteasome (prosome, macropain) 26S subunit, non-ATPase, 1                     | Ubiquitin-specific protease activity          | Cytoplasm                   | Ubiquitin proteasome system protein | Protein metabolism/Proteolysis and peptidolysis                              | CC               | Yes                      |
| GEMN4       | 50628   | gem-associated protein 4                                                   | NP_056536.2       | 2          | 8                 | 8          | 17     | 1.09                                                     | 0.98                                                     | 3.68                                                                                   | 8.29                                                                                   | 10.6                                                                                          | 21.7                                                                                          | 7                                                                              | 7                                                                              | 7370    | 50628          | gem (nuclear organelle) associated protein 4                                   | Molecular function unknown                    | Nucleus                     | Unclassified                        | Reproductive behavior                                                        | -                | Yes                      |
| DHX30       | 22907   | putative ATP-dependent RNA helicase DHX30 isoform 1                        | NP_619520.1       | 2          | 14                | 14         | 25     | 1.09                                                     | 0.98                                                     | 4.46                                                                                   | 8.93                                                                                   | 17.7                                                                                          | 32.4                                                                                          | 13                                                                             | 13                                                                             | 13142   | 22907          | DEAH (Asp-Glu-Ala-His) box polypeptide 30                                      | RNA binding                                   | Nucleus                     | RNA binding protein                 | RNA metabolism                                                               | DSRM;DEXDc;HELIC | No                       |
| PPP1CC      | 5501    | serine/threonine-protein phosphatase PPI-gamma catalytic subunit isoform 2 | NP_001231903.1    | 2          | 1                 | 13         | 49     | 1.09                                                     | 0.98                                                     |                                                                                        |                                                                                        |                                                                                               |                                                                                               | 1                                                                              | 1                                                                              | 8911    | 5501           | protein phosphatase 1, catalytic subunit, gamma isoform                        | Protein serine/threonine phosphatase activity | Nucleus                     | Serine/threonine phosphatase        | Cell communication/Signal transduction                                       | PP2A             | Yes                      |
| BMS1        | 9790    | ribosome biogenesis protein BMS1 homolog                                   | NP_055568.3       | 1          | 6                 | 6          | 11     | 1.09                                                     | 0.98                                                     | 4.51                                                                                   | 4.94                                                                                   | 12.1                                                                                          | 10.8                                                                                          | 6                                                                              | 5                                                                              | 10689   | 9790           | BMS1-like, ribosome assembly protein (yeast)                                   | Molecular function unknown                    | Nucleolus                   | Unclassified                        | Biological processes unknown                                                 | CC;GTP_EFTU      | Yes                      |
| CLIP1       | 6249    | CAP-Gly domain-containing linker protein 1 isoform c                       | NP_001234926.1    | 3          | 15                | 16         | 40     | 1.09                                                     | 0.97                                                     | 4.16                                                                                   | 4.62                                                                                   | 20.4                                                                                          | 20.3                                                                                          | 20                                                                             | 20                                                                             | 1568    | 6249           | resin (Reed-Steinberg cell-expressed intermediate filament-associated protein) | Structural molecule activity                  | Microtubule/Cytoplasm       | Structural protein                  | Cell growth and/or maintenance/Mitosis                                       | ZnF_C2HC;CC      | Yes                      |
| PNPLA6      | 10908   | neuropathy target esterase isoform a                                       | NP_001159583.1    | 4          | 7                 | 7          | 17     | 1.09                                                     | 0.97                                                     | 15.76                                                                                  | 7.54                                                                                   | 51.7                                                                                          | 21                                                                                            | 8                                                                              | 8                                                                              | 4432    | 10908          | None                                                                           | Hydrolase activity                            | Endoplasmic reticulum       | Enzyme: Esterase                    | Metabolism/Energy pathways                                                   | TM               | Yes                      |
| N4BP1       | 9683    | NEDD4-binding protein 1                                                    | NP_694574.3       | 1          | 3                 | 3          | 4      | 1.09                                                     | 0.97                                                     |                                                                                        |                                                                                        |                                                                                               |                                                                                               | 1                                                                              | 1                                                                              |         |                |                                                                                |                                               |                             |                                     |                                                                              |                  |                          |
| RPL24       | 6152    | 60S ribosomal protein L24                                                  | NP_000977.1       | 1          | 8                 | 8          | 69     | 1.09                                                     | 0.96                                                     | 5                                                                                      | 5.34                                                                                   | 34.9                                                                                          | 32.9                                                                                          | 39                                                                             | 39                                                                             | 10365   | 6152           | ribosomal protein L24                                                          | Structural constituent of ribosome            | Ribosome                    | Ribosomal subunit                   | Protein metabolism                                                           | CC;TRASH         | Yes                      |
| NPM1        | 4869    | nucleophosmin isoform 1                                                    | NP_002511.1       | 4          | 2                 | 17         | 164    | 1.09                                                     | 0.96                                                     | 12.24                                                                                  | 16.84                                                                                  | 63.2                                                                                          | 80.2                                                                                          | 19                                                                             | 19                                                                             | 1246    | 4869           | nucleophosmin (nuclear phosphoprotein B23, numatrin)                           | Chaperone activity                            | Nucleolus/Nucleus/Cytoplasm | Chaperone                           | Protein metabolism                                                           | -                | Yes                      |
| CBX3        | 11335   | chromobox protein homolog 3                                                | NP_057671.2       | 1          | 6                 | 7          | 24     | 1.09                                                     | 0.95                                                     | 6.55                                                                                   | 3.86                                                                                   | 19                                                                                            | 9.7                                                                                           | 7                                                                              | 7                                                                              | 5130    | 11335          | chromobox homolog 3 (HP1 gamma homolog, Drosophila)                            | DNA binding                                   | Nucleus                     | DNA binding protein                 | Regulation of gene expression, epigenetic                                    | CHROMO           | Yes                      |
| AHCYL1      | 10768   | putative adenosylhomocysteinase 2 isoform a                                | NP_006612.2       | 6          | 7                 | 9          | 17     | 1.09                                                     | 0.95                                                     | 10.56                                                                                  | 10.07                                                                                  | 31.2                                                                                          | 25.7                                                                                          | 7                                                                              | 7                                                                              | 7613    | 10768          | S-adenosylhomocysteinase hydrolase-like 1                                      | Hydrolase activity                            | Cytoplasm                   | Enzyme: Hydrolase                   | Metabolism/Energy pathways                                                   | CC               | Yes                      |
| ACBD3       | 64746   | Golgi resident protein GCP60                                               | NP_073572.2       | 1          | 12                | 12         | 38     | 1.09                                                     | 0.95                                                     | 4.63                                                                                   | 12.36                                                                                  | 21.1                                                                                          | 51.3                                                                                          | 17                                                                             | 17                                                                             | 8432    | 64746          | acyl-Coenzyme A binding domain containing 3                                    | Transporter activity                          | Golgi apparatus             | Transport/cargo protein             | Cell communication/Signal transduction                                       | CC               | Yes                      |

Supplementary Table S1. List of quantified proteins in OKF6/TERT1-Smoke cells  
 Raingopaln *et al.*, 2017. Role of protein kinase N2 (PKN2) in cigarette smoke-mediated oncogenic transformation of oral cells

| Gene Symbol | Gene ID | Protein Description                                       | Protein Accession | # Proteins | # Unique Peptides | # Peptides | # PSMs | OKF6/TERT1-Smoke/<br>OKF6/TERT1-Parental<br>(130/126) R1 | OKF6/TERT1-Smoke/<br>OKF6/TERT1-Parental<br>(128/127) R2 | Ratio Standard Errors [%]:<br>OKF6/TERT1-Smoke/<br>OKF6/TERT1-Parental<br>(130/126) R1 | Ratio Standard Errors [%]:<br>OKF6/TERT1-Smoke/<br>OKF6/TERT1-Parental<br>(128/127) R2 | Ratio Variabilities [%]:<br>F13: OKF6/TERT1-<br>Smoke/<br>OKF6/TERT1-Parental<br>(130/126) R1 | Ratio Variabilities [%]:<br>F13: OKF6/TERT1-<br>Smoke/<br>OKF6/TERT1-Parental<br>(128/127) R2 | Ratio Counts: F13:<br>OKF6/TERT1-Smoke/<br>OKF6/TERT1-Parental<br>(130/126) R1 | Ratio Counts: F13:<br>OKF6/TERT1-Smoke/<br>OKF6/TERT1-Parental<br>(128/127) R2 | HPRD ID | Entrez Gene Id | Gene Name                                                          | Molecular Function                           | Primary Localization  | Molecular Class                  | Biological Process                                                                                         | Domains          | Plasma Proteome Database |
|-------------|---------|-----------------------------------------------------------|-------------------|------------|-------------------|------------|--------|----------------------------------------------------------|----------------------------------------------------------|----------------------------------------------------------------------------------------|----------------------------------------------------------------------------------------|-----------------------------------------------------------------------------------------------|-----------------------------------------------------------------------------------------------|--------------------------------------------------------------------------------|--------------------------------------------------------------------------------|---------|----------------|--------------------------------------------------------------------|----------------------------------------------|-----------------------|----------------------------------|------------------------------------------------------------------------------------------------------------|------------------|--------------------------|
| MSH2        | 4436    | DNA mismatch repair protein Msh2 isoform 1                | NP_000242.1       | 3          | 12                | 12         | 18     | 1.09                                                     | 0.93                                                     | 4.69                                                                                   | 5.52                                                                                   | 15.4                                                                                          | 15.5                                                                                          | 9                                                                              | 9                                                                              | 389     | 4436           | mutS homolog 2, colon cancer, nonpolyposis type 1 (E. coli)        | DNA repair protein                           | Nucleus               | DNA repair protein               | Regulation of nucleobase, nucleoside and nucleic acid metabolism                                           | CC;MUTSd;MUT Sac | Yes                      |
| TFAM        | 7019    | transcription factor A, mitochondrial isoform 1 precursor | NP_003192.1       | 2          | 7                 | 7          | 12     | 1.09                                                     | 0.93                                                     | 3.89                                                                                   | 6.06                                                                                   | 11.3                                                                                          | 14.9                                                                                          | 7                                                                              | 7                                                                              | 2702    | 7019           | transcription factor A, mitochondrial                              | Transcription factor activity                | Mitochondrion         | Transcription factor             | Regulation of nucleobase, nucleoside and nucleic acid metabolism                                           | HMG;SP           | No                       |
| PI3K        | 10026   | GPI-anchor transamidase precursor                         | NP_005473.1       | 1          | 3                 | 3          | 9      | 1.09                                                     | 0.92                                                     | 4.45                                                                                   | 6.21                                                                                   | 11.9                                                                                          | 14.1                                                                                          | 6                                                                              | 6                                                                              | 5474    | 10026          | phosphatidylinositol 3-kinase, class K                             | Cysteine-type peptidase activity             | Endoplasmic reticulum | Cysteine protease                | Protein metabolism                                                                                         | SP;TM            | No                       |
| COP9        | 8533    | COP9 signalosome complex subunit 3 isoform 1              | NP_003644.2       | 2          | 7                 | 7          | 20     | 1.09                                                     | 0.92                                                     | 9.14                                                                                   | 18.98                                                                                  | 32.2                                                                                          | 59.4                                                                                          | 10                                                                             | 10                                                                             | 7262    | 8533           | COP9 constitutive photomorphogenic homolog subunit 3 (Arabidopsis) | Transcription regulator activity             | Cytoplasm             | Transcription regulatory protein | Cell communication;Signal transduction                                                                     | PINT             | No                       |
| DDX54       | 79039   | ATP-dependent RNA helicase DDX54 isoform 1                | NP_001104792.1    | 2          | 3                 | 3          | 3      | 1.09                                                     | 0.91                                                     | 0.16                                                                                   | 6.02                                                                                   | 0.3                                                                                           | 9.5                                                                                           | 3                                                                              | 3                                                                              | 13129   | 79039          | DEAD (Asp-Glu-Ala-Asp) box polypeptide 54                          | RNA binding                                  | Nucleolus             | RNA helicase                     | Regulation of nucleobase, nucleoside and nucleic acid metabolism                                           | DEXd;HELIC;NLS   | Yes                      |
| NBN         | 4683    | nibrin                                                    | NP_002476.2       | 2          | 3                 | 3          | 6      | 1.09                                                     | 0.9                                                      | 2.09                                                                                   | 5.95                                                                                   | 3.9                                                                                           | 9.3                                                                                           | 3                                                                              | 3                                                                              | 4050    | 4683           | nibrin                                                             | DNA binding                                  | Nucleus               | DNA repair protein               | DNA repair                                                                                                 | FHA;CC;BRCT      | Yes                      |
| CLPTM1L     | 81037   | cleft lip and palate transmembrane protein 1-like protein | NP_110409.2       | 1          | 3                 | 3          | 5      | 1.09                                                     | 0.88                                                     | 1.13                                                                                   | 4.54                                                                                   | 2.1                                                                                           | 6.9                                                                                           | 3                                                                              | 3                                                                              | 7480    | 81037          | None                                                               | Molecular function unknown                   | Integral to membrane  | Integral membrane protein        | Biological process unknown                                                                                 | TM               | No                       |
| RPTOR       | 57521   | regulatory-associated protein of mTOR isoform 1           | NP_065812.1       | 2          | 3                 | 3          | 5      | 1.09                                                     | 0.87                                                     | 15.47                                                                                  | 10.24                                                                                  | 29.8                                                                                          | 15.5                                                                                          | 3                                                                              | 3                                                                              | 6184    | 57521          | None                                                               | Molecular function unknown                   | Cytoplasm             | Unclassified                     | Cell communication;Signal transduction                                                                     | WD40             | Yes                      |
| PTBP1       | 5725    | polypyrimidine tract-binding protein 1 isoform c          | NP_114368.1       | 3          | 19                | 22         | 246    | 1.09                                                     | 0.82                                                     | 3.52                                                                                   | 5.69                                                                                   | 38.9                                                                                          | 48.2                                                                                          | 95                                                                             | 95                                                                             | 2823    | 5725           | polypyrimidine tract binding protein 1                             | Ribonucleoprotein                            | Nucleus               | Ribonucleoprotein                | Regulation of nucleobase, nucleoside and nucleic acid metabolism                                           | RRM              | Yes                      |
| CC2D1A      | 54862   | coiled-coil and C2 domain-containing protein 1A           | NP_060191.3       | 1          | 9                 | 9          | 20     | 1.09                                                     | 0.81                                                     | 4.65                                                                                   | 10.5                                                                                   | 15.3                                                                                          | 25.9                                                                                          | 9                                                                              | 9                                                                              | 8616    | 54862          | None                                                               | Transcription regulator activity             | Cytoplasm             | Transcription regulatory protein | Cell communication;Signal transduction                                                                     | C2;CC            | Yes                      |
| SCO1        | 6341    | protein SCO1 homolog, mitochondrial                       | NP_004580.1       | 1          | 3                 | 3          | 5      | 1.09                                                     | 0.79                                                     | 5.87                                                                                   | 19.7                                                                                   | 11.1                                                                                          | 27.4                                                                                          | 3                                                                              | 3                                                                              | 4705    | 6341           | SCO cytochrome oxidase deficient homolog 1 (yeast)                 | Molecular function unknown                   | Mitochondrion         | Unclassified                     | Metabolism;Energy pathways                                                                                 | -                | No                       |
| RBM19       | 9904    | probable RNA-binding protein 19                           | NP_057280.2       | 1          | 1                 | 1          | 1      | 1.09                                                     | 0.78                                                     |                                                                                        |                                                                                        |                                                                                               |                                                                                               | 1                                                                              | 1                                                                              | 15225   | 9904           | RNA binding motif protein 19                                       | RNA binding                                  | Nucleolus             | RNA binding protein              | Regulation of nucleobase, nucleoside and nucleic acid metabolism                                           | RRM              | Yes                      |
| GHTM        | 27069   | growth hormone-inducible transmembrane protein            | NP_055209.2       | 1          | 3                 | 3          | 3      | 1.09                                                     | 0.77                                                     | 4.44                                                                                   | 17.5                                                                                   | 6.8                                                                                           | 19.1                                                                                          | 2                                                                              | 2                                                                              | 17038   | 27069          | growth hormone inducible transmembrane protein                     | Molecular function unknown                   | Integral to membrane  | Integral membrane protein        | Biological process unknown                                                                                 | TM               | Yes                      |
| HDHD1       | 8226    | pseudouridine-5'-phosphatase isoform a                    | NP_001129037.1    | 3          | 1                 | 1          | 2      | 1.09                                                     | 0.74                                                     |                                                                                        |                                                                                        |                                                                                               |                                                                                               | 1                                                                              | 1                                                                              |         |                |                                                                    |                                              |                       |                                  |                                                                                                            |                  |                          |
| HDAC7       | 51564   | histone deacetylase 7 isoform a                           | NP_056216.2       | 3          | 1                 | 1          | 1      | 1.09                                                     | 0.74                                                     |                                                                                        |                                                                                        |                                                                                               |                                                                                               | 1                                                                              | 1                                                                              | 9133    | 51564          | histone deacetylase 7A                                             | Deacetylase activity                         | Nucleus               | Enzyme: Deacetylase              | Regulation of nucleobase, nucleoside and nucleic acid metabolism;Regulation of gene expression, epigenetic | NES;NLS          | Yes                      |
| LAPTM4A     | 9741    | lysosomal-associated transmembrane protein 4A             | NP_055528.1       | 1          | 1                 | 1          | 1      | 1.09                                                     | 0.72                                                     |                                                                                        |                                                                                        |                                                                                               |                                                                                               | 1                                                                              | 1                                                                              | 13959   | 9741           | lysosomal-associated protein transmembrane 4alpha                  | Auxiliary transport protein activity         | Golgi apparatus       | Membrane transport protein       | Transport                                                                                                  | TM               | No                       |
| SYNJ2       | 8871    | synaptotagmin-2 isoform 1                                 | NP_003889.1       | 2          | 1                 | 1          | 1      | 1.09                                                     | 0.71                                                     |                                                                                        |                                                                                        |                                                                                               |                                                                                               | 1                                                                              | 1                                                                              | 10259   | 8871           | synaptotagmin 2                                                    | Lipid phosphatase activity                   | Cytoplasm             | Lipid phosphatase                | Metabolism;Energy pathways                                                                                 | L_Phosphatase    | Yes                      |
| C12orf57    | 113246  | protein C10 isoform 1                                     | NP_612434.1       | 4          | 2                 | 2          | 5      | 1.09                                                     | 0.71                                                     | 16.96                                                                                  | 12.02                                                                                  | 33                                                                                            | 14.8                                                                                          | 3                                                                              | 3                                                                              | 13609   | 113246         | None                                                               | Molecular function unknown                   | -                     | Unclassified                     | Biological process unknown                                                                                 | -                | Yes                      |
| RAP1B       | 5908    | ras-related protein Rap-1b isoform 1 precursor            | NP_056461.1       | 4          | 3                 | 10         | 26     | 1.09                                                     | 0.7                                                      | 3.29                                                                                   | 17.46                                                                                  | 8                                                                                             | 27.8                                                                                          | 5                                                                              | 5                                                                              | 1546    | 5908           | RAP1B, member of RAS oncogene family                               | GTPase activity                              | Nucleus               | GTPase                           | Cell communication;Signal transduction                                                                     | RAS              | Yes                      |
| DVL3        | 1857    | segment polarity protein dishevelled homolog DVL-3        | NP_004414.3       | 1          | 1                 | 2          | 3      | 1.09                                                     | 0.61                                                     |                                                                                        |                                                                                        |                                                                                               |                                                                                               | 1                                                                              | 1                                                                              | 3222    | 1857           | dishevelled, dsh homolog 3 (Drosophila)                            | Receptor signaling complex scaffold activity | Cytoplasm             | Adapter molecule                 | Cell communication;Signal transduction                                                                     | DSH;PDZ          | Yes                      |
| FLII        | 2314    | protein flightless-1 homolog isoform 1                    | NP_002009.1       | 3          | 1                 | 35         | 94     | 1.09                                                     | 0.54                                                     |                                                                                        |                                                                                        |                                                                                               |                                                                                               | 1                                                                              | 1                                                                              | 2647    | 2314           | flightless 1 homolog (Drosophila)                                  | Cytoskeletal protein binding                 | Nucleus               | Cytoskeletal associated protein  | Cell growth and/or maintenance                                                                             | GEL;CC;LRR       | Yes                      |
| AF4         | 27125   | AF4/FMR2 family member 4                                  | NP_055238.1       | 1          | 2                 | 2          | 6      | 1.08                                                     | 1.63                                                     | 26.62                                                                                  | 1.26                                                                                   | 53.3                                                                                          | 3.6                                                                                           | 3                                                                              | 3                                                                              | 9187    | 27125          | None                                                               | Transcription factor activity                | Nucleus               | Transcription factor             | Regulation of nucleobase, nucleoside and nucleic acid metabolism                                           | -                | Yes                      |
| NTMT1       | 28989   | N-terminal Xaa-Pro-Lys N-methyltransferase 1 isoform a    | NP_001273725.1    | 3          | 5                 | 5          | 10     | 1.08                                                     | 1.62                                                     | 10.19                                                                                  | 6.11                                                                                   | 22.3                                                                                          | 20                                                                                            | 4                                                                              | 4                                                                              |         |                |                                                                    |                                              |                       |                                  |                                                                                                            |                  |                          |
| CALM2       | 805     | calmodulin isoform 1                                      | NP_001292553.1    | 3          | 7                 | 7          | 187    | 1.08                                                     | 1.62                                                     | 8.94                                                                                   | 5.18                                                                                   | 75.6                                                                                          | 60.9                                                                                          | 48                                                                             | 45                                                                             | 242     | 805            | calmodulin 2 (phosphorylase kinase, delta)                         | Calcium ion binding                          | Cytoplasm             | Calcium binding protein          | Cell communication;Signal transduction                                                                     | EF               | Yes                      |

Supplementary Table S1. List of quantified proteins in OKF6/TERT1-Smoke cells  
 Raigopaln *et al.*, 2017. Role of protein kinase N2 (PKN2) in cigarette smoke-mediated oncogenic transformation of oral cells

| Gene Symbol | Gene ID | Protein Description                                                           | Protein Accession | # Proteins | # Unique Peptides | # Peptides | # PSMs | OKF6/TERT1-Smoke/<br>OKF6/TERT1-Parental<br>(130/126) R1 | OKF6/TERT1-Smoke/<br>OKF6/TERT1-Parental<br>(128/127) R2 | Ratio Standard Errors [%]:<br>OKF6/TERT1-Smoke/<br>OKF6/TERT1-Parental<br>(130/126) R1 | Ratio Standard Errors [%]:<br>OKF6/TERT1-Smoke/<br>OKF6/TERT1-Parental<br>(128/127) R2 | Ratio Variabilities [%]:<br>F13: OKF6/TERT1-<br>Smoke/<br>OKF6/TERT1-Parental<br>(130/126) R1 | Ratio Variabilities [%]:<br>F13: OKF6/TERT1-<br>Smoke/<br>OKF6/TERT1-Parental<br>(128/127) R2 | Ratio Counts: F13:<br>OKF6/TERT1-Smoke/<br>OKF6/TERT1-Parental<br>(130/126) R1 | Ratio Counts: F13:<br>OKF6/TERT1-Smoke/<br>OKF6/TERT1-Parental<br>(128/127) R2 | HPRD ID | Entrez Gene Id | Gene Name                                                                                                       | Molecular Function                       | Primary Localization  | Molecular Class                  | Biological Process                                                | Domains                         | Plasma Proteome Database |
|-------------|---------|-------------------------------------------------------------------------------|-------------------|------------|-------------------|------------|--------|----------------------------------------------------------|----------------------------------------------------------|----------------------------------------------------------------------------------------|----------------------------------------------------------------------------------------|-----------------------------------------------------------------------------------------------|-----------------------------------------------------------------------------------------------|--------------------------------------------------------------------------------|--------------------------------------------------------------------------------|---------|----------------|-----------------------------------------------------------------------------------------------------------------|------------------------------------------|-----------------------|----------------------------------|-------------------------------------------------------------------|---------------------------------|--------------------------|
| KHRP        | 8570    | far upstream element-binding protein 2                                        | NP_003676.2       | 1          | 16                | 17         | 40     | 1.08                                                     | 1.58                                                     | 4.67                                                                                   | 4.08                                                                                   | 24                                                                                            | 30.9                                                                                          | 22                                                                             | 22                                                                             | 10350   | 8570           | KH-type splicing regulatory protein (FUSE-binding protein 2)                                                    | Transcription regulator activity         | Nucleus               | Transcription regulatory protein | Regulation of nucleobase, nucleotide, and nucleic acid metabolism | KH                              | Yes                      |
| ERCC2       | 2068    | TFIIH basal transcription factor complex helicase XPB subunit isoform 1       | NP_000391.1       | 2          | 2                 | 2          | 6      | 1.08                                                     | 1.56                                                     | 25.02                                                                                  | 27.45                                                                                  | 49.6                                                                                          | 85.6                                                                                          | 3                                                                              | 3                                                                              | 530     | 2068           | excision repair cross-complementing rodent repair deficiency, complementation group 2 (xeroderma pigmentosum D) | DNA repair protein                       | Nucleus               | DNA repair protein               | Regulation of nucleobase, nucleotide, and nucleic acid metabolism | DEXDc:HELIC                     | Yes                      |
| RBM4        | 5936    | RNA-binding protein 4 isoform 1                                               | NP_002887.2       | 4          | 4                 | 4          | 7      | 1.08                                                     | 1.5                                                      | 4.2                                                                                    | 15.67                                                                                  | 7.9                                                                                           | 42.5                                                                                          | 3                                                                              | 3                                                                              | 3982    | 5936           | RNA binding motif protein 4                                                                                     | RNA binding                              | Nucleus               | RNA binding protein              | Regulation of nucleobase, nucleotide, and nucleic acid metabolism | RRM;ZnF_C2HC                    | No                       |
| PDHX        | 8050    | pyruvate dehydrogenase protein X component, mitochondrial isoform 1 precursor | NP_003468.2       | 3          | 6                 | 6          | 10     | 1.08                                                     | 1.49                                                     | 7.28                                                                                   | 8.82                                                                                   | 17.7                                                                                          | 29.9                                                                                          | 5                                                                              | 5                                                                              | 2002    | 8050           | pyruvate dehydrogenase complex, component X                                                                     | Catalytic activity                       | Mitochondrion         | Enzyme: Dehydrogenase            | Metabolism;Energy pathways                                        | -                               | Yes                      |
| PPP6R3      | 55291   | serine/threonine-protein phosphatase 6 regulatory subunit 3 isoform 4         | NP_0011157632.1   | 6          | 11                | 11         | 17     | 1.08                                                     | 1.48                                                     | 8.71                                                                                   | 3.37                                                                                   | 30.4                                                                                          | 15.9                                                                                          | 10                                                                             | 10                                                                             |         |                |                                                                                                                 |                                          |                       |                                  |                                                                   |                                 |                          |
| RPS6KB2     | 6199    | ribosomal protein S6 kinase beta-2                                            | NP_003943.2       | 6          | 1                 | 2          | 2      | 1.08                                                     | 1.46                                                     |                                                                                        |                                                                                        |                                                                                               |                                                                                               | 1                                                                              | 1                                                                              | 10203   | 6199           | ribosomal protein S6 kinase, 70kDa, polypeptide 2                                                               | Protein serine/threonine kinase activity | Cytoplasm             | Serine/threonine kinase          | Protein metabolism;Signal transduction                            | S_T_kinase;NES;NLS;S_T_Y_Kinase | Yes                      |
| ATP5SL      | 55101   | ATP synthase subunit s-like protein isoform 1                                 | NP_001161539.1    | 3          | 2                 | 2          | 5      | 1.08                                                     | 1.46                                                     | 4.13                                                                                   | 14.23                                                                                  | 6.3                                                                                           | 30                                                                                            | 2                                                                              | 2                                                                              | 7655    | 55101          | None                                                                                                            | Molecular function unknown               | -                     | Unclassified                     | Biological process unknown                                        | -                               | No                       |
| FGFBP1      | 9982    | fibroblast growth factor-binding protein 1 precursor                          | NP_005121.1       | 1          | 7                 | 7          | 11     | 1.08                                                     | 1.44                                                     | 10.27                                                                                  | 4.83                                                                                   | 32.1                                                                                          | 19.8                                                                                          | 8                                                                              | 8                                                                              | 6371    | 9982           | fibroblast growth factor binding protein 1                                                                      | Chaperone activity                       | Extracellular         | Chaperone                        | Cell communication;Signal transduction                            | SP                              | No                       |
| WDR26       | 80232   | WD repeat-containing protein 26 isoform a                                     | NP_079436.4       | 2          | 6                 | 6          | 10     | 1.08                                                     | 1.4                                                      | 6.45                                                                                   | 10.67                                                                                  | 15.7                                                                                          | 34.4                                                                                          | 5                                                                              | 5                                                                              | 18298   | 80232          | WD repeat domain 26                                                                                             | Molecular function unknown               | -                     | Unclassified                     | Biological process unknown                                        | CTLH;WDR40                      | Yes                      |
| PSAP        | 5660    | prosaposin isoform b preproprotein                                            | NP_001035930.1    | 3          | 14                | 14         | 44     | 1.08                                                     | 1.38                                                     | 3.96                                                                                   | 9.62                                                                                   | 19.8                                                                                          | 67                                                                                            | 21                                                                             | 21                                                                             | 1460    | 5660           | prosaposin (variant Gaucher disease and variant macrochromatic leukodystrophy)                                  | Lipid binding                            | Lysosome              | Integral membrane protein        | Cell communication;Signal transduction                            | SAPA;SAPB;SP                    | Yes                      |
| TUBA3C      | 7278    | tubulin alpha-3C/D chain                                                      | NP_005992.1       | 2          | 1                 | 24         | 444    | 1.08                                                     | 1.34                                                     |                                                                                        |                                                                                        |                                                                                               |                                                                                               | 1                                                                              | 1                                                                              | 3958    | 7278           | tubulin, alpha 2                                                                                                | Structural molecule activity             | Cytoplasm             | Structural protein               | Cell growth and/or maintenance                                    | TUBULIN;CC                      | Yes                      |
| TUSC3       | 7991    | tumor suppressor candidate 3 isoform a precursor                              | NP_006756.2       | 2          | 1                 | 1          | 2      | 1.08                                                     | 1.34                                                     |                                                                                        |                                                                                        |                                                                                               |                                                                                               | 1                                                                              | 1                                                                              | 3228    | 7991           | tumor suppressor candidate 3                                                                                    | Molecular function unknown               | Integral to membrane  | Integral membrane protein        | Cell communication;Signal transduction                            | TM                              | Yes                      |
| BUB3        | 9184    | mitotic checkpoint protein BUB3 isoform a                                     | NP_004716.1       | 2          | 9                 | 9          | 24     | 1.08                                                     | 1.33                                                     | 6.36                                                                                   | 5.11                                                                                   | 23                                                                                            | 22.9                                                                                          | 11                                                                             | 11                                                                             | 4761    | 9184           | BUB3 budding uninhibited by benzimidazoles 3 homolog (yeast)                                                    | Protein transporter activity             | Cytoplasm             | Cell cycle control protein       | Regulation of cell cycle;Signal transduction                      | WD40                            | Yes                      |
| NLE1        | 54475   | notchless protein homolog 1 isoform a                                         | NP_060566.2       | 2          | 4                 | 4          | 9      | 1.08                                                     | 1.25                                                     | 2.35                                                                                   | 9.23                                                                                   | 5.7                                                                                           | 26.2                                                                                          | 5                                                                              | 5                                                                              | 16903   | 54475          | notchless homolog 1 (Drosophila)                                                                                | Molecular function unknown               | Nucleolus             | Unclassified                     | Biological process unknown                                        | WD40                            | Yes                      |
| ERI1        | 90459   | 3'-5' exonuclease 1                                                           | NP_699163.2       | 1          | 1                 | 1          | 1      | 1.08                                                     | 1.23                                                     |                                                                                        |                                                                                        |                                                                                               |                                                                                               | 1                                                                              | 1                                                                              | 11784   | 90459          | three prime histone mRNA exonuclease 1                                                                          | Ribonuclease activity                    | -                     | Ribonuclease                     | Regulation of nucleobase, nucleotide, and nucleic acid metabolism | SAP;EXOIII                      | No                       |
| IBA57       | 200205  | putative transferase CAF17, mitochondrial precursor                           | NP_001010867.1    | 1          | 2                 | 2          | 4      | 1.08                                                     | 1.22                                                     | 8.6                                                                                    | 21.98                                                                                  | 13.2                                                                                          | 39.3                                                                                          | 2                                                                              | 2                                                                              |         |                |                                                                                                                 |                                          |                       |                                  |                                                                   |                                 |                          |
| MPP6        | 51678   | MAGUK p55 subfamily member 6                                                  | NP_057531.2       | 4          | 5                 | 6          | 14     | 1.08                                                     | 1.22                                                     | 3.51                                                                                   | 6.29                                                                                   | 9.3                                                                                           | 19                                                                                            | 6                                                                              | 6                                                                              | 9509    | 51678          | membrane protein, palmitoylated 6 (MAGUK p55 subfamily member 6)                                                | Molecular function unknown               | Plasma membrane       | Unclassified                     | Cell communication;Signal transduction                            | PDZ;SH3;GuKinase                | Yes                      |
| DNAJC10     | 54431   | dnaJ homolog subfamily C member 10 isoform 1 precursor                        | NP_061854.1       | 2          | 10                | 10         | 18     | 1.08                                                     | 1.22                                                     | 10.27                                                                                  | 7.49                                                                                   | 36.2                                                                                          | 29.4                                                                                          | 10                                                                             | 10                                                                             | 9722    | 54431          | DnaJ (Hsp40) homolog, subfamily C, member 10                                                                    | Molecular function unknown               | Endoplasmic reticulum | Unclassified                     | Protein metabolism                                                | DNAJ                            | No                       |
| EXOSC2      | 23404   | exosome complex component RRP4 isoform 1                                      | NP_055100.2       | 3          | 4                 | 4          | 14     | 1.08                                                     | 1.22                                                     | 2.04                                                                                   | 9.87                                                                                   | 5.8                                                                                           | 32.6                                                                                          | 7                                                                              | 7                                                                              | 3758    | 23404          | exosome component 2                                                                                             | Ribonuclease activity                    | Nucleus               | Ribonuclease                     | Regulation of nucleobase, nucleotide, and nucleic acid metabolism | S1                              | Yes                      |
| TARS        | 6897    | threonine-tRNA ligase, cytoplasmic isoform 1                                  | NP_689508.3       | 3          | 30                | 30         | 119    | 1.08                                                     | 1.21                                                     | 2.96                                                                                   | 3.48                                                                                   | 25.7                                                                                          | 34.3                                                                                          | 63                                                                             | 63                                                                             | 1762    | 6897           | threonyl-tRNA synthetase                                                                                        | Ligase activity                          | Cytoplasm             | Enzyme: Ligase                   | Metabolism;Energy pathways                                        | -                               | Yes                      |
| MMP14       | 4323    | matrix metalloproteinase-14 preproprotein                                     | NP_004986.1       | 1          | 5                 | 5          | 7      | 1.08                                                     | 1.21                                                     | 3.79                                                                                   | 6.93                                                                                   | 9.2                                                                                           | 18.9                                                                                          | 5                                                                              | 5                                                                              | 2856    | 4323           | matrix metalloproteinase 14 (membrane-inserted)                                                                 | Metalloproteinase activity               | Extracellular         | Metallo protease                 | Protein metabolism                                                | TM;ZnMc;HXSP                    | Yes                      |
| SGTB        | 54557   | small glutamine-rich tetratricopeptide repeat-containing protein beta         | NP_061945.1       | 1          | 1                 | 1          | 2      | 1.08                                                     | 1.2                                                      |                                                                                        |                                                                                        |                                                                                               |                                                                                               | 1                                                                              | 1                                                                              | 18049   | 54557          | small glutamine-rich tetratricopeptide repeat (TPR)-containing, beta                                            | Molecular function unknown               | -                     | Unclassified                     | Biological process unknown                                        | TPR                             | Yes                      |
| RPS25       | 6230    | 40S ribosomal protein S25                                                     | NP_001019.1       | 1          | 5                 | 5          | 28     | 1.08                                                     | 1.2                                                      | 3.6                                                                                    | 4.76                                                                                   | 14.6                                                                                          | 21.6                                                                                          | 14                                                                             | 14                                                                             | 1593    | 6230           | ribosomal protein S25                                                                                           | Structural constituent of ribosome       | Ribosome              | Ribosomal subunit                | Protein metabolism                                                | -                               | Yes                      |
| PCYT2       | 5833    | ethanolamine-phosphate cytidylyltransferase isoform 1                         | NP_001171846.1    | 6          | 1                 | 1          | 1      | 1.08                                                     | 1.2                                                      |                                                                                        |                                                                                        |                                                                                               |                                                                                               | 1                                                                              | 1                                                                              | 4059    | 5833           | phosphate cytidylyltransferase 2, ethanolamine                                                                  | Nucleotidyltransferase activity          | Cytoplasm             | Enzyme: Nucleotidyltransferase   | Metabolism;Energy pathways                                        | -                               | Yes                      |



Supplementary Table S1. List of quantified proteins in OKF6/TERT1-Smoke cells  
 Raigopaln *et al.*, 2017. Role of protein kinase N2 (PKN2) in cigarette smoke-mediated oncogenic transformation of oral cells

| Gene Symbol | Gene ID | Protein Description                                             | Protein Accession | # Proteins | # Unique Peptides | # Peptides | # PSMs | OKF6/TERT1-Smoke/<br>OKF6/TERT1-Parental<br>(130/126) R1 | OKF6/TERT1-Smoke/<br>OKF6/TERT1-Parental<br>(128/127) R2 | Ratio Standard Errors [%]:<br>OKF6/TERT1-Smoke/<br>OKF6/TERT1-Parental<br>(130/126) R1 | Ratio Standard Errors [%]:<br>OKF6/TERT1-Smoke/<br>OKF6/TERT1-Parental<br>(128/127) R2 | Ratio Variabilities [%]:<br>F13: OKF6/TERT1-<br>Smoke/<br>OKF6/TERT1-Parental<br>(130/126) R1 | Ratio Variabilities [%]:<br>F13: OKF6/TERT1-<br>Smoke/<br>OKF6/TERT1-Parental<br>(128/127) R2 | Ratio Counts: F13:<br>OKF6/TERT1-Smoke/<br>OKF6/TERT1-Parental<br>(130/126) R1 | Ratio Counts: F13:<br>OKF6/TERT1-Smoke/<br>OKF6/TERT1-Parental<br>(128/127) R2 | HPRD ID | Entrez Gene ID | Gene Name                                                                                                                  | Molecular Function                                           | Primary Localization | Molecular Class                    | Biological Process                                               | Domains                    | Plasma Proteome Database |  |
|-------------|---------|-----------------------------------------------------------------|-------------------|------------|-------------------|------------|--------|----------------------------------------------------------|----------------------------------------------------------|----------------------------------------------------------------------------------------|----------------------------------------------------------------------------------------|-----------------------------------------------------------------------------------------------|-----------------------------------------------------------------------------------------------|--------------------------------------------------------------------------------|--------------------------------------------------------------------------------|---------|----------------|----------------------------------------------------------------------------------------------------------------------------|--------------------------------------------------------------|----------------------|------------------------------------|------------------------------------------------------------------|----------------------------|--------------------------|--|
| HMGB1       | 3146    | high mobility group protein B1                                  | NP_002119.1       | 1          | 6                 | 7          | 24     | 1.08                                                     | 1.04                                                     | 4.95                                                                                   | 6.59                                                                                   | 17.1                                                                                          | 22                                                                                            | 10                                                                             | 10                                                                             | 1228    | 3146           | high-mobility group box 1                                                                                                  | DNA binding                                                  | Nucleus              | DNA binding protein                | Regulation of nucleobase, nucleotide and nucleic acid metabolism | HMG,CC                     | Yes                      |  |
| REEP4       | 80346   | receptor expression-enhancing protein 4 precursor               | NP_079508.2       | 1          | 1                 | 1          | 2      | 1.08                                                     | 1.03                                                     |                                                                                        |                                                                                        |                                                                                               |                                                                                               | 1                                                                              | 1                                                                              | 9864    | 80346          | chromosome 8 open reading frame 20                                                                                         | Molecular function unknown                                   | Nucleus/Cytoplasm    | Unclassified                       | Biological process unknown                                       | SP,TM                      | No                       |  |
| WDR18       | 57418   | WD repeat-containing protein 18                                 | NP_077005.2       | 1          | 4                 | 4          | 7      | 1.08                                                     | 1.03                                                     | 10.72                                                                                  | 1.93                                                                                   | 23.4                                                                                          | 4                                                                                             | 4                                                                              | 4                                                                              | 18296   | 57418          | WD repeat domain 18                                                                                                        | Molecular function unknown                                   | Nucleolus            | Unclassified                       | Biological process unknown                                       | WD40                       | Yes                      |  |
| TMEM160     | 54958   | transmembrane protein 160 precursor                             | NP_060324.1       | 1          | 1                 | 1          | 2      | 1.08                                                     | 1.02                                                     |                                                                                        |                                                                                        |                                                                                               |                                                                                               | 1                                                                              | 1                                                                              | 7920    | 54958          | None                                                                                                                       | Molecular function unknown                                   | Plasma membrane      | Unclassified                       | Biological process unknown                                       | TM                         | No                       |  |
| GART        | 2618    | trifunctional purine biosynthetic protein adenosine-3 isozyme 1 | NP_001129477.1    | 2          | 38                | 38         | 140    | 1.08                                                     | 1.02                                                     | 2.28                                                                                   | 3.48                                                                                   | 21.5                                                                                          | 31.4                                                                                          | 75                                                                             | 75                                                                             | 716     | 2618           | phosphoribosylglycinamide formyltransferase, phosphoribosylglycinamide synthetase, phosphoribosylaminoimidazole synthetase | Ligase activity                                              | Cytosol              | Enzyme: Transferase                | Regulation of nucleobase, nucleotide and nucleic acid metabolism | -                          | Yes                      |  |
| MIF4G       | 57409   | MIF4G domain-containing protein isoform 4                       | NP_001229430.1    | 1          | 1                 | 1          | 1      | 1.08                                                     | 1.02                                                     |                                                                                        |                                                                                        |                                                                                               |                                                                                               | 1                                                                              | 1                                                                              | 10629   | 57409          | None                                                                                                                       | Molecular function unknown                                   | -                    | Unclassified                       | Biological process unknown                                       | MIF4G                      | No                       |  |
| C9orf89     | 84270   | bcl10-interacting CARD protein                                  | NP_115686.3       | 1          | 1                 | 1          | 1      | 1.08                                                     | 1.02                                                     |                                                                                        |                                                                                        |                                                                                               |                                                                                               | 1                                                                              | 1                                                                              | 12985   | 84270          | chromosome 9 open reading frame 89                                                                                         | Molecular function unknown                                   | Nucleus              | Unclassified                       | Cell communication;Signal transduction                           | CARD,TM                    | No                       |  |
| SCY12       | 55681   | SCY1-like protein 2                                             | NP_060458.3       | 1          | 3                 | 3          | 4      | 1.08                                                     | 1.01                                                     | 7.33                                                                                   | 5.72                                                                                   | 11.2                                                                                          | 8.2                                                                                           | 2                                                                              | 2                                                                              | 7642    | 55681          | SCY1-like 2 (S. cerevisiae)                                                                                                | Kinase activity                                              | Perinuclear region   | Serine/threonine kinase            | Regulation of endocytosis                                        | CC;Tyr_Kinase              | No                       |  |
| CDK7        | 1022    | cyclin-dependent kinase 7                                       | NP_001790.1       | 3          | 3                 | 3          | 8      | 1.08                                                     | 1.01                                                     | 2.59                                                                                   | 8.25                                                                                   | 4.9                                                                                           | 14.6                                                                                          | 3                                                                              | 3                                                                              | 15993   | 1022           | cyclin-dependent kinase 7 (MO15 homolog, Xenopus laevis, cdk-activating kinase)                                            | Protein serine/threonine kinase activity                     | Nucleus              | Serine/threonine kinase            | Regulation of nucleobase, nucleotide and nucleic acid metabolism | S_T_kinase                 | Yes                      |  |
| HSD17B4     | 3295    | peroxisomal multifunctional enzyme type 2 isoform 2             | NP_000405.1       | 5          | 31                | 31         | 128    | 1.08                                                     | 1.01                                                     | 2.22                                                                                   | 3.52                                                                                   | 19.9                                                                                          | 29.8                                                                                          | 67                                                                             | 67                                                                             | 3514    | 3295           | hydroxysteroid (17-beta) dehydrogenase 4                                                                                   | Catalytic activity                                           | Peroxisome           | Enzyme: Dehydrogenase              | Metabolism;Energy pathways                                       | -                          | Yes                      |  |
| CSRFP2      | 1466    | cysteine and glycine-rich protein 2                             | NP_001312.1       | 1          | 1                 | 1          | 2      | 1.08                                                     | 1                                                        |                                                                                        |                                                                                        |                                                                                               |                                                                                               | 1                                                                              | 1                                                                              | 3523    | 1466           | cysteine and glycine-rich protein 2                                                                                        | Receptor signaling complex scaffold activity                 | Nucleus              | Adapter molecule                   | Cell communication;Signal transduction                           | LIM,NLS                    | Yes                      |  |
| EMC1        | 23065   | ER membrane protein complex subunit 1 isoform 1 precursor       | NP_055862.1       | 4          | 15                | 15         | 41     | 1.08                                                     | 0.99                                                     | 3.02                                                                                   | 6.04                                                                                   | 15.8                                                                                          | 29.4                                                                                          | 23                                                                             | 23                                                                             |         |                |                                                                                                                            |                                                              |                      |                                    |                                                                  |                            |                          |  |
| TKT         | 7086    | transketolase isoform 2                                         | NP_001244957.1    | 2          | 30                | 30         | 275    | 1.08                                                     | 0.99                                                     | 1.71                                                                                   | 2.57                                                                                   | 20.8                                                                                          | 29                                                                                            | 124                                                                            | 124                                                                            | 6001    | 7086           | transketolase (Wernicke-Korsakoff syndrome)                                                                                | Transferase activity, transferring aldehyde or ketone groups | Cytoplasm            | Enzyme: Transketolase              | Metabolism;Energy pathways                                       | -                          | Yes                      |  |
| XAB2        | 56949   | pre-mRNA-splicing factor SYF1                                   | NP_064581.2       | 1          | 9                 | 9          | 16     | 1.08                                                     | 0.99                                                     | 1.42                                                                                   | 3.22                                                                                   | 4.9                                                                                           | 10.1                                                                                          | 10                                                                             | 10                                                                             | 18306   | 56949          | XPA binding protein 2                                                                                                      | DNA repair protein                                           | Nucleus              | DNA repair protein                 | Regulation of nucleobase, nucleotide and nucleic acid metabolism | TPR                        | Yes                      |  |
| ATP6V1D     | 51382   | V-type proton ATPase subunit D                                  | NP_057078.1       | 1          | 4                 | 4          | 9      | 1.08                                                     | 0.99                                                     | 4.17                                                                                   | 3.3                                                                                    | 10.1                                                                                          | 7.3                                                                                           | 5                                                                              | 5                                                                              | 16524   | 51382          | ATPase, H+-transporting, lysosomal 34kDa, V1 subunit D                                                                     | ATPase activity                                              | Integral to membrane | ATPase                             | Metabolism;Energy pathways                                       | CC                         | Yes                      |  |
| NFS1        | 9054    | cysteine desulfurase, mitochondrial isoform a precursor         | NP_066923.3       | 2          | 11                | 11         | 18     | 1.08                                                     | 0.98                                                     | 7.44                                                                                   | 6.53                                                                                   | 25.8                                                                                          | 20.5                                                                                          | 10                                                                             | 10                                                                             | 4597    | 9054           | NFS1 nitrogen fixation 1 (S. cerevisiae)                                                                                   | Sulfotransferase activity                                    | Mitochondrion        | Enzyme: Sulfotransferase           | Metabolism;Energy pathways                                       | NLS                        | Yes                      |  |
| NUP214      | 8021    | nuclear pore complex protein Nup214                             | NP_005076.3       | 1          | 21                | 21         | 34     | 1.08                                                     | 0.97                                                     | 5.35                                                                                   | 3.62                                                                                   | 25.6                                                                                          | 15.4                                                                                          | 19                                                                             | 19                                                                             | 258     | 8021           | nucleoporin 214kDa                                                                                                         | Transporter activity                                         | Nucleus              | Transport/cargo protein            | Transport                                                        | WD40                       | Yes                      |  |
| RAPGEF2     | 9693    | rap guanine nucleotide exchange factor 2                        | NP_055062.1       | 1          | 1                 | 1          | 2      | 1.08                                                     | 0.97                                                     |                                                                                        |                                                                                        |                                                                                               |                                                                                               | 1                                                                              | 1                                                                              | 19358   | 9693           | Rap guanine nucleotide exchange factor (GEF) 2                                                                             | Guanyl-nucleotide exchange factor activity                   | Synapse              | Guanine nucleotide exchange factor | Signal transduction;Cell communication                           | CNMP;RasGEFN;PDZ;RA;RasGEF | Yes                      |  |
| TIMM44      | 10469   | mitochondrial import inner membrane translocase subunit TIM44   | NP_006342.2       | 1          | 10                | 10         | 23     | 1.08                                                     | 0.96                                                     | 6.7                                                                                    | 5.12                                                                                   | 26.6                                                                                          | 17.9                                                                                          | 13                                                                             | 13                                                                             | 5450    | 10469          | translocase of inner mitochondrial membrane 44homolog (yeast)                                                              | Catalytic activity                                           | Mitochondrion        | Enzyme: Translocase                | Transport                                                        | CC                         | Yes                      |  |
| PTRH1       | 138428  | probable peptidyl-rRNA hydrolase                                | NP_001002913.1    | 1          | 1                 | 1          | 2      | 1.08                                                     | 0.96                                                     |                                                                                        |                                                                                        |                                                                                               |                                                                                               | 1                                                                              | 1                                                                              | 12936   | 138428         | chromosome 9 open reading frame 115                                                                                        | Hydrolase activity                                           | -                    | Enzyme: Hydrolase                  | Metabolism;Energy pathways                                       | -                          | No                       |  |
| SMARCA4     | 6597    | transcription activator BRG1 isoform A                          | NP_001122321.1    | 9          | 9                 | 12         | 22     | 1.08                                                     | 0.96                                                     | 3.81                                                                                   | 5.43                                                                                   | 13.7                                                                                          | 17.4                                                                                          | 11                                                                             | 11                                                                             | 4459    | 6597           | SWI5NF related, matrix associated, actin dependent regulator of chromatin, subfamily a, member 4                           | Transcription factor activity                                | Nucleus              | Transcription factor               | Regulation of nucleobase, nucleotide and nucleic acid metabolism | BRK;DEXDC;HELIC;BROMOCC    | Yes                      |  |
| HNRNPU      | 3192    | heterogeneous nuclear ribonucleoprotein U isoform b             | NP_004492.2       | 2          | 26                | 26         | 197    | 1.08                                                     | 0.95                                                     | 2.64                                                                                   | 4.11                                                                                   | 30.2                                                                                          | 41.9                                                                                          | 106                                                                            | 106                                                                            | 4185    | 3192           | heterogeneous nuclear ribonucleoprotein U(scaffold attachment factor A)                                                    | RNA binding                                                  | Nucleus/Cytoplasm    | Ribonucleoprotein                  | Regulation of nucleobase, nucleotide and nucleic acid metabolism | SAP;SPRY;CC;NLS            | Yes                      |  |
| ARHGAP12    | 94134   | Rho GTPase-activating protein 12 isoform 1                      | NP_060757.4       | 6          | 1                 | 1          | 2      | 1.08                                                     | 0.95                                                     |                                                                                        |                                                                                        |                                                                                               |                                                                                               | 1                                                                              | 1                                                                              | 6446    | 94134          | Rho GTPase activating protein 12                                                                                           | GTPase activator activity                                    | Cytoplasm            | GTPase activating protein          | Cell communication;Signal transduction                           | SH3;WW;PHR;OGAP            | Yes                      |  |
| MRPS12      | 6183    | 28S ribosomal protein S12, mitochondrial precursor              | NP_066930.1       | 1          | 3                 | 3          | 6      | 1.08                                                     | 0.95                                                     | 5.3                                                                                    | 1.19                                                                                   | 9.9                                                                                           | 1.9                                                                                           | 3                                                                              | 3                                                                              | 4316    | 6183           | mitochondrial ribosomal protein S12                                                                                        | Structural constituent of ribosome                           | Mitochondrion        | Ribosomal subunit                  | Protein metabolism;Ribosome biogenesis and assembly              | SP                         | Yes                      |  |
| YME1L1      | 10730   | ATP-dependent zinc metalloprotease YME1L1 isoform 1             | NP_647473.1       | 3          | 9                 | 9          | 20     | 1.08                                                     | 0.95                                                     | 4.11                                                                                   | 7.28                                                                                   | 14.8                                                                                          | 23.2                                                                                          | 11                                                                             | 11                                                                             | 6981    | 10730          | YME1-like 1 (S. cerevisiae)                                                                                                | Metalloprotease activity                                     | Mitochondrion        | Metalloprotease                    | Protein metabolism                                               | AAA                        | Yes                      |  |

Supplementary Table S1. List of quantified proteins in OKF6/TERT1-Smoke cells  
 Raingopaln *et al.*, 2017. Role of protein kinase N2 (PKN2) in cigarette smoke-mediated oncogenic transformation of oral cells

| Gene Symbol | Gene ID | Protein Description                                                  | Protein Accession | # Proteins | # Unique Peptides | # Peptides | # PSMs | OKF6/TERT1-Smoke/<br>OKF6/TERT1-Parental<br>(130/126) R1 | OKF6/TERT1-Smoke/<br>OKF6/TERT1-Parental<br>(128/127) R2 | Ratio Standard Errors [%]:<br>OKF6/TERT1-Smoke/<br>OKF6/TERT1-Parental<br>(130/126) R1 | Ratio Standard Errors [%]:<br>OKF6/TERT1-Smoke/<br>OKF6/TERT1-Parental<br>(128/127) R2 | Ratio Variabilities [%]:<br>F13: OKF6/TERT1-<br>Smoke/<br>OKF6/TERT1-Parental<br>(130/126) R1 | Ratio Variabilities [%]:<br>F13: OKF6/TERT1-<br>Smoke/<br>OKF6/TERT1-Parental<br>(128/127) R2 | Ratio Counts: F13:<br>OKF6/TERT1-Smoke/<br>OKF6/TERT1-Parental<br>(130/126) R1 | Ratio Counts: F13:<br>OKF6/TERT1-Smoke/<br>OKF6/TERT1-Parental<br>(128/127) R2 | HPRD ID | Entrez Gene Id | Gene Name                                                                        | Molecular Function                     | Primary Localization   | Molecular Class                     | Biological Process                                               | Domains       | Plasma Proteome Database |
|-------------|---------|----------------------------------------------------------------------|-------------------|------------|-------------------|------------|--------|----------------------------------------------------------|----------------------------------------------------------|----------------------------------------------------------------------------------------|----------------------------------------------------------------------------------------|-----------------------------------------------------------------------------------------------|-----------------------------------------------------------------------------------------------|--------------------------------------------------------------------------------|--------------------------------------------------------------------------------|---------|----------------|----------------------------------------------------------------------------------|----------------------------------------|------------------------|-------------------------------------|------------------------------------------------------------------|---------------|--------------------------|
| GDI1        | 2664    | rab-GDP dissociation inhibitor alpha                                 | NP_001484.1       | 1          | 15                | 22         | 86     | 1.08                                                     | 0.94                                                     | 5.27                                                                                   | 10.1                                                                                   | 24.6                                                                                          | 43                                                                                            | 18                                                                             | 19                                                                             | 2114    | 2664           | GDP dissociation inhibitor 1                                                     | GTPase activator activity              | Cytoplasm              | GTPase activating protein           | Cell communication;Signal transduction                           | -             | Yes                      |
| TNKS1BP1    | 85456   | 182 kDa tankyrase-1-binding protein                                  | NP_203754.2       | 1          | 64                | 64         | 206    | 1.08                                                     | 0.94                                                     | 1.53                                                                                   | 2.9                                                                                    | 16.3                                                                                          | 26.9                                                                                          | 95                                                                             | 94                                                                             | 6164    | 85456          | tankyrase 1 binding protein 1, FKBDs                                             | Molecular function unknown             | Nucleus                | Unclassified                        | Regulation of nucleobase, nucleotide and nucleic acid metabolism | NLS           | Yes                      |
| NUPL1       | 9818    | nucleoporin p58/p45 isoform a                                        | NP_054808.1       | 2          | 3                 | 3          | 5      | 1.08                                                     | 0.93                                                     | 16.51                                                                                  | 2.17                                                                                   | 31.5                                                                                          | 3.5                                                                                           | 3                                                                              | 3                                                                              | 6355    | 9818           | nucleoporin like 1                                                               | Molecular function unknown             | Nucleus                | Unclassified                        | Biological process unknown                                       | CC            | Yes                      |
| UBE3C       | 9690    | ubiquitin-protein ligase E3C                                         | NP_055486.2       | 1          | 6                 | 6          | 10     | 1.08                                                     | 0.92                                                     | 8.89                                                                                   | 17.28                                                                                  | 19.4                                                                                          | 32.4                                                                                          | 4                                                                              | 4                                                                              | 15604   | 9690           | ubiquitin-protein ligase E3C                                                     | Ubiquitin-specific protease activity   | -                      | Ubiquitin proteasome system protein | Protein metabolism                                               | IQ,HECT       | Yes                      |
| ZNF638      | 27332   | zinc finger protein 638 isoform 1                                    | NP_055312.2       | 2          | 12                | 12         | 24     | 1.08                                                     | 0.91                                                     | 2.71                                                                                   | 6.83                                                                                   | 10.2                                                                                          | 21.8                                                                                          | 12                                                                             | 12                                                                             | 11736   | 27332          | zinc finger protein 638                                                          | DNA binding                            | Nuclear matrix;Nucleus | DNA binding protein                 | Regulation of nucleobase, nucleotide and nucleic acid metabolism | ZNFC2;RRM     | Yes                      |
| PLEKHM2     | 23207   | pleckstrin homology domain-containing family M member 2              | NP_055979.2       | 1          | 1                 | 1          | 2      | 1.08                                                     | 0.91                                                     |                                                                                        |                                                                                        |                                                                                               |                                                                                               | 1                                                                              | 1                                                                              | 11440   | 23207          | pleckstrin homology domain containing family M (with RUN domain) member 2        | Molecular function unknown             | Cytosol                | Unclassified                        | Biological process unknown                                       | PH            | Yes                      |
| ARPC1A      | 10552   | actin-related protein 2/3 complex subunit 1A isoform 1               | NP_006400.2       | 2          | 3                 | 3          | 5      | 1.08                                                     | 0.91                                                     | 4.7                                                                                    | 1.6                                                                                    | 8.8                                                                                           | 2.5                                                                                           | 3                                                                              | 3                                                                              | 7252    | 10552          | actin related protein 2/3 complex, subunit 1A, 41kDa                             | Structural constituent of cytoskeleton | Cytoplasm              | Cytoskeletal protein                | Cell growth and/or maintenance                                   | WD40          | Yes                      |
| BBX         | 56987   | HMG box transcription factor BBX isoform 1                           | NP_001136040.1    | 2          | 1                 | 1          | 2      | 1.08                                                     | 0.9                                                      |                                                                                        |                                                                                        |                                                                                               |                                                                                               | 1                                                                              | 1                                                                              | 10688   | 56987          | bobby sox homolog (Drosophila)                                                   | Transcription factor activity          | Nucleus                | Transcription factor                | Regulation of nucleobase, nucleotide and nucleic acid metabolism | HMG;CC        | Yes                      |
| GOSR2       | 9570    | Golgi SNAP receptor complex member 2 isoform B                       | NP_473363.1       | 3          | 3                 | 3          | 5      | 1.08                                                     | 0.9                                                      | 5.94                                                                                   | 21.3                                                                                   | 11.1                                                                                          | 34.2                                                                                          | 3                                                                              | 3                                                                              | 4937    | 9570           | golgi SNAP receptor complex member 2                                             | Auxiliary transport protein activity   | Golgi apparatus        | Membrane transport protein          | Transport                                                        | CC;TM         | No                       |
| STX16       | 8675    | syntaxin-16 isoform b                                                | NP_003754.2       | 5          | 2                 | 2          | 7      | 1.08                                                     | 0.87                                                     | 13.46                                                                                  | 22.42                                                                                  | 29.6                                                                                          | 40.5                                                                                          | 4                                                                              | 4                                                                              | 4718    | 8675           | syntaxin 16                                                                      | Transporter activity                   | Golgi apparatus        | Transport/cargo protein             | Transport                                                        | TM;LSNARE;Syn | Yes                      |
| CCDC51      | 79714   | coiled-coil domain-containing protein 51 isoform 1                   | NP_001243893.1    | 2          | 5                 | 5          | 8      | 1.08                                                     | 0.87                                                     | 9.09                                                                                   | 4.88                                                                                   | 19.8                                                                                          | 8.5                                                                                           | 4                                                                              | 4                                                                              | 8571    | 79714          | None                                                                             | Molecular function unknown             | -                      | Unclassified                        | Biological process unknown                                       | CC;TM         | No                       |
| HMGCR       | 3156    | 3-hydroxy-3-methylglutaryl-Coenzyme A reductase isoform 1            | NP_000850.1       | 2          | 2                 | 2          | 4      | 1.08                                                     | 0.87                                                     | 1.95                                                                                   | 30.15                                                                                  | 3                                                                                             | 38.5                                                                                          | 2                                                                              | 2                                                                              | 836     | 3156           | 3-hydroxy-3-methylglutaryl-Coenzyme A reductase                                  | Catalytic activity                     | Endoplasmic reticulum  | Enzyme: Reductase                   | Metabolism;Energy pathways                                       | TM;SP         | Yes                      |
| CLN6        | 54982   | ceroid-lipofuscinosis neuronal protein 6                             | NP_060352.1       | 1          | 1                 | 1          | 5      | 1.08                                                     | 0.86                                                     | 9.1                                                                                    | 14.03                                                                                  | 13.9                                                                                          | 17.3                                                                                          | 2                                                                              | 2                                                                              | 5991    | 54982          | ceroid-lipofuscinosis, neuronal 6, late infantile, variant                       | Molecular function unknown             | Plasma membrane        | Unclassified                        | Biological process unknown                                       | TM            | Yes                      |
| WDR54       | 84058   | WD repeat-containing protein 54                                      | NP_115494.1       | 1          | 1                 | 1          | 2      | 1.08                                                     | 0.84                                                     |                                                                                        |                                                                                        |                                                                                               |                                                                                               | 1                                                                              | 1                                                                              | 8577    | 84058          | WD repeat domain 54                                                              | Molecular function unknown             | -                      | Unclassified                        | Biological process unknown                                       | WD40          | No                       |
| SERINC1     | 57515   | serine incorporator 1 precursor                                      | NP_065806.1       | 1          | 2                 | 2          | 3      | 1.08                                                     | 0.82                                                     | 13.43                                                                                  | 7.86                                                                                   | 20.7                                                                                          | 9.1                                                                                           | 2                                                                              | 2                                                                              | 15480   | 57515          | tumor differentially expressed 2                                                 | Protein binding                        | Plasma membrane        | Integral membrane protein           | Biological process unknown                                       | SP;TM         | Yes                      |
| MAN1B1      | 11253   | endoplasmic reticulum mannosyl-oligosaccharide 1,2-alpha-mannosidase | NP_057303.2       | 1          | 3                 | 3          | 4      | 1.08                                                     | 0.82                                                     | 6.73                                                                                   | 3.23                                                                                   | 12.6                                                                                          | 4.6                                                                                           | 3                                                                              | 3                                                                              | 5068    | 11253          | mannosidase, alpha, class IB, member 1                                           | Hydrolase activity                     | Endoplasmic reticulum  | Enzyme: Hydrolase                   | Metabolism;Energy pathways                                       | TM            | Yes                      |
| PRPS2       | 5634    | ribose-phosphate pyrophosphokinase 2 isoform 2                       | NP_002756.1       | 2          | 3                 | 10         | 24     | 1.08                                                     | 0.81                                                     | 7.82                                                                                   | 5.21                                                                                   | 14.8                                                                                          | 7.3                                                                                           | 3                                                                              | 3                                                                              | 2414    | 5634           | phosphoribosyl pyrophosphate synthetase 2                                        | Ligase activity                        | Cytoplasm              | Enzyme: Ligase                      | Metabolism;Energy pathways                                       | -             | Yes                      |
| NSFL1C      | 55968   | NSFL1 cofactor p47 isoform d                                         | NP_001193665.1    | 3          | 7                 | 7          | 22     | 1.08                                                     | 0.79                                                     | 6.17                                                                                   | 8.13                                                                                   | 22.3                                                                                          | 21.5                                                                                          | 11                                                                             | 11                                                                             | 9425    | 55968          | NSFL1 (p97) cofactor (p47)                                                       | Molecular function unknown             | Nucleus;Cytoplasm      | Unclassified                        | Cell growth and/or maintenance                                   | UBX;NLS;UBA   | Yes                      |
| GNA13       | 10672   | guanine nucleotide-binding protein subunit alpha-13 isoform 1        | NP_006563.2       | 9          | 3                 | 4          | 35     | 1.08                                                     | 0.79                                                     | 5.07                                                                                   | 6.73                                                                                   | 9.5                                                                                           | 9.3                                                                                           | 3                                                                              | 3                                                                              | 5100    | 10672          | guanine nucleotide binding protein (G protein), alpha 13                         | GTPase activity                        | Plasma membrane        | G protein                           | Cell communication;Signal transduction                           | -             | Yes                      |
| MIEN1       | 84299   | migration and invasion enhancer 1                                    | NP_115715.3       | 1          | 1                 | 1          | 2      | 1.08                                                     | 0.78                                                     |                                                                                        |                                                                                        |                                                                                               |                                                                                               | 1                                                                              | 1                                                                              |         |                |                                                                                  |                                        |                        |                                     |                                                                  |               |                          |
| PMVK        | 10654   | phosphomevalonate kinase                                             | NP_006547.1       | 1          | 1                 | 1          | 1      | 1.08                                                     | 0.73                                                     |                                                                                        |                                                                                        |                                                                                               |                                                                                               | 1                                                                              | 1                                                                              | 7404    | 10654          | phosphomevalonate kinase                                                         | Lipid kinase activity                  | Peroxisome             | Lipid Kinase                        | Metabolism;Energy pathways                                       | -             | Yes                      |
| LSM4        | 25804   | U6 snRNA-associated Sm-like protein LSM4 isoform 1                   | NP_036453.1       | 2          | 3                 | 3          | 6      | 1.08                                                     | 0.63                                                     | 15.28                                                                                  | 32.64                                                                                  | 33.9                                                                                          | 42.6                                                                                          | 4                                                                              | 4                                                                              | 6284    | 25804          | LSM4 homolog, U6 small nuclear RNA-associated(S, cerevisiae)                     | RNA binding                            | Cytoplasm              | RNA binding protein                 | Regulation of nucleobase, nucleotide and nucleic acid metabolism | SM            | Yes                      |
| MEMO1       | 51072   | protein MEMO1 isoform 1                                              | NP_057039.1       | 3          | 1                 | 1          | 2      | 1.07                                                     | 1.91                                                     |                                                                                        |                                                                                        |                                                                                               |                                                                                               | 1                                                                              | 1                                                                              | 12814   | 51072          | chromosome 2 open reading frame 4                                                | Molecular function unknown             | -                      | Unclassified                        | Biological process unknown                                       | -             | Yes                      |
| TAF15       | 8148    | TATA-binding protein-associated factor 2N isoform 1                  | NP_631961.1       | 2          | 12                | 14         | 51     | 1.07                                                     | 1.6                                                      | 14.47                                                                                  | 5.27                                                                                   | 60.7                                                                                          | 29.9                                                                                          | 13                                                                             | 12                                                                             | 9031    | 8148           | TAF15 RNA polymerase II, TATA box binding protein (TBP)-associated factor, 68kDa | Transcription regulator activity       | Nucleus                | Transcription regulatory protein    | Regulation of nucleobase, nucleotide and nucleic acid metabolism | RRM;ZnF;RZB   | Yes                      |
| GANAB       | 23193   | neutral alpha-glucosidase AB isoform 2 precursor                     | NP_938148.1       | 3          | 1                 | 36         | 143    | 1.07                                                     | 1.55                                                     | 2.13                                                                                   | 5.93                                                                                   | 3.9                                                                                           | 16                                                                                            | 3                                                                              | 3                                                                              | 3516    | 23193          | glucosidase, alpha, neutral AB                                                   | Hydrolase activity                     | Endoplasmic reticulum  | Enzyme: Hydrolase                   | Carbohydrate metabolism                                          | SP            | Yes                      |







Supplementary Table S1. List of quantified proteins in OKF6/TERT1-Smoke cells  
 Raingonalan *et al.*, 2017. Role of protein kinase N2 (PKN2) in cigarette smoke-mediated oncogenic transformation of oral cells

| Gene Symbol | Gene ID | Protein Description                                                                        | Protein Accession | # Proteins | # Unique Peptides | # Peptides | # PSMs | OKF6/TERT1-Smoke/<br>OKF6/TERT1-Parental<br>(130/126) R1 | OKF6/TERT1-Smoke/<br>OKF6/TERT1-Parental<br>(128/127) R2 | Ratio Standard Errors [%]:<br>OKF6/TERT1-Smoke/<br>OKF6/TERT1-Parental<br>(130/126) R1 | Ratio Standard Errors [%]:<br>OKF6/TERT1-Smoke/<br>OKF6/TERT1-Parental<br>(128/127) R2 | Ratio Variabilities [%]:<br>F13: OKF6/TERT1-<br>Smoke/<br>OKF6/TERT1-Parental<br>(130/126) R1 | Ratio Variabilities [%]:<br>F13: OKF6/TERT1-<br>Smoke/<br>OKF6/TERT1-Parental<br>(128/127) R2 | Ratio Counts: F13:<br>OKF6/TERT1-Smoke/<br>OKF6/TERT1-Parental<br>(130/126) R1 | Ratio Counts: F13:<br>OKF6/TERT1-Smoke/<br>OKF6/TERT1-Parental<br>(128/127) R2 | HPRD ID | Entrez Gene ID | Gene Name                                                                              | Molecular Function                           | Primary Localization | Molecular Class                     | Biological Process                                               | Domains             | Plasma Proteome Database |
|-------------|---------|--------------------------------------------------------------------------------------------|-------------------|------------|-------------------|------------|--------|----------------------------------------------------------|----------------------------------------------------------|----------------------------------------------------------------------------------------|----------------------------------------------------------------------------------------|-----------------------------------------------------------------------------------------------|-----------------------------------------------------------------------------------------------|--------------------------------------------------------------------------------|--------------------------------------------------------------------------------|---------|----------------|----------------------------------------------------------------------------------------|----------------------------------------------|----------------------|-------------------------------------|------------------------------------------------------------------|---------------------|--------------------------|
| MRPL22      | 29093   | 39S ribosomal protein L22, mitochondrial isoform a                                         | NP_054899.2       | 2          | 6                 | 6          | 13     | 1.07                                                     | 0.85                                                     | 9.41                                                                                   | 7.95                                                                                   | 29.1                                                                                          | 19.4                                                                                          | 8                                                                              | 8                                                                              | 14748   | 29093          | mitochondrial ribosomal protein L22                                                    | Structural constituent of ribosome           | Mitochondrion        | Ribosomal subunit                   | Protein metabolism                                               | -                   | No                       |
| INTS3       | 65123   | integrator complex subunit 3                                                               | NP_075391.3       | 1          | 5                 | 5          | 7      | 1.07                                                     | 0.84                                                     | 6.99                                                                                   | 14.3                                                                                   | 16.9                                                                                          | 27.3                                                                                          | 5                                                                              | 5                                                                              | 8644    | 65123          | chromosome 1 open reading frame 60                                                     | Molecular function unknown                   | -                    | Unclassified                        | Biological process unknown                                       | -                   | No                       |
| NRP1        | 8829    | neuropilin-1 isoform a precursor                                                           | NP_003864.4       | 5          | 1                 | 1          | 3      | 1.07                                                     | 0.84                                                     |                                                                                        |                                                                                        |                                                                                               |                                                                                               | 1                                                                              | 1                                                                              | 3642    | 8829           | neuropilin 1                                                                           | Receptor activity                            | Plasma membrane      | Cell surface receptor               | Signal transduction;Cell migration;Morphogenesis;Immune response | TM,CUB,F5RC;MAM,SP  | Yes                      |
| CCDC22      | 28952   | coiled-coil domain-containing protein 22                                                   | NP_054727.1       | 1          | 3                 | 3          | 16     | 1.07                                                     | 0.84                                                     | 6.64                                                                                   | 6.43                                                                                   | 19                                                                                            | 14.3                                                                                          | 7                                                                              | 7                                                                              | 6594    | 28952          | chromosome X open reading frame 37                                                     | Molecular function unknown                   | -                    | Unclassified                        | Biological process unknown                                       | CC                  | No                       |
| FBXO22      | 26263   | F-box only protein 22 isoform a                                                            | NP_671717.1       | 2          | 5                 | 5          | 12     | 1.07                                                     | 0.83                                                     | 6.34                                                                                   | 12.1                                                                                   | 18.1                                                                                          | 27                                                                                            | 7                                                                              | 7                                                                              | 16437   | 26263          | F-box protein 22                                                                       | Ubiquitin-specific protease activity         | -                    | Ubiquitin proteasome system protein | Protein metabolism                                               | F_BOX               | Yes                      |
| ADGRG1      | 9289    | G-protein coupled receptor 56 isoform a precursor                                          | NP_005673.3       | 5          | 1                 | 1          | 1      | 1.07                                                     | 0.81                                                     |                                                                                        |                                                                                        |                                                                                               |                                                                                               | 1                                                                              | 1                                                                              |         |                |                                                                                        |                                              |                      |                                     |                                                                  |                     |                          |
| SLC27A3     | 11000   | long-chain fatty acid transport protein 3                                                  | NP_077306.1       | 1          | 1                 | 1          | 1      | 1.07                                                     | 0.81                                                     |                                                                                        |                                                                                        |                                                                                               |                                                                                               | 1                                                                              | 1                                                                              | 11967   | 11000          | solute carrier family 27 (fatty acid transporters), member 3                           | Auxiliary transport protein activity         | Integral to membrane | Membrane transport protein          | Transport                                                        | TM                  | No                       |
| RALGAPB     | 57148   | ral GTPase-activating protein subunit beta isoform 1                                       | NP_001269846.1    | 2          | 5                 | 5          | 12     | 1.07                                                     | 0.81                                                     | 8.08                                                                                   | 18.74                                                                                  | 21.4                                                                                          | 38.4                                                                                          | 6                                                                              | 6                                                                              | 11133   | 57148          | None                                                                                   | GTPase activator activity                    | Smooth microsome     | GTPase activating protein           | Cell communication;Signal transduction                           | -                   | Yes                      |
| L3MBTL3     | 84456   | lethal(3)malignant brain tumor-like protein 3 isoform a                                    | NP_115814.1       | 2          | 1                 | 1          | 1      | 1.07                                                     | 0.76                                                     |                                                                                        |                                                                                        |                                                                                               |                                                                                               | 1                                                                              | 1                                                                              | 11222   | 84456          | l3mbtl-like 3 (Drosophila)                                                             | Transcription regulator activity             | Nucleus              | Transcription regulatory protein    | Regulation of nucleobase, nucleotide and nucleic acid metabolism | SAM,MBT             | No                       |
| DVL2        | 1856    | segment polarity protein dishevelled homolog DVL-2                                         | NP_004413.1       | 1          | 5                 | 6          | 10     | 1.07                                                     | 0.75                                                     | 14.6                                                                                   | 19.36                                                                                  | 31.9                                                                                          | 29.8                                                                                          | 4                                                                              | 4                                                                              | 3690    | 1856           | dishevelled, dsh homolog 2 (Drosophila)                                                | Receptor signaling complex scaffold activity | Cytoplasm            | Adapter molecule                    | Cell communication;Signal transduction                           | DSH,PDZ             | Yes                      |
| KIF14       | 9928    | kinesin-like protein KIF14 isoform 1                                                       | NP_055690.1       | 2          | 2                 | 2          | 4      | 1.07                                                     | 0.72                                                     | 20.52                                                                                  | 13.89                                                                                  | 31.8                                                                                          | 14.3                                                                                          | 2                                                                              | 2                                                                              | 6605    | 9928           | kinesin family member 14                                                               | Motor activity                               | Microtubule;Nucleus  | Motor protein                       | Cell growth and/or maintenance                                   | CC;KIS;FHA          | Yes                      |
| GMPR        | 2766    | GMP reductase 1                                                                            | NP_006868.3       | 1          | 1                 | 2          | 4      | 1.07                                                     | 0.72                                                     |                                                                                        |                                                                                        |                                                                                               |                                                                                               | 1                                                                              | 1                                                                              | 754     | 2766           | guanosine monophosphate reductase                                                      | Catalytic activity                           | Cytoplasm            | Enzyme;Reductase                    | Metabolism;Energy pathways                                       | -                   | Yes                      |
| CNOT2       | 4848    | CCR4-NOT transcription complex subunit 2                                                   | NP_055330.1       | 1          | 2                 | 2          | 4      | 1.07                                                     | 0.66                                                     | 4.65                                                                                   | 2.06                                                                                   | 7                                                                                             | 1.9                                                                                           | 2                                                                              | 2                                                                              | 5367    | 4848           | CCR4-NOT transcription complex, subunit 2                                              | Transcription regulator activity             | Nucleus              | Transcription regulatory protein    | Regulation of nucleobase, nucleotide and nucleic acid metabolism | NLS                 | Yes                      |
| TCEB1       | 6921    | transcription elongation factor B polypeptide 1 isoform a                                  | NP_005639.1       | 2          | 5                 | 5          | 14     | 1.07                                                     | 0.6                                                      | 5.98                                                                                   | 15.2                                                                                   | 17                                                                                            | 24.6                                                                                          | 7                                                                              | 7                                                                              | 2875    | 6921           | transcription elongation factor B (SII), polypeptide 1 (15kDa, elongin C)              | Transcription regulator activity             | Nucleus              | Transcription regulatory protein    | Regulation of nucleobase, nucleotide and nucleic acid metabolism | SKP1                | Yes                      |
| ARHGDB      | 397     | rho GDP-dissociation inhibitor 2                                                           | NP_001166.3       | 1          | 3                 | 3          | 4      | 1.07                                                     | 0.59                                                     | 1.31                                                                                   | 3.97                                                                                   | 2.4                                                                                           | 4.1                                                                                           | 3                                                                              | 3                                                                              | 4162    | 397            | Rho GDP dissociation inhibitor (GDI) beta                                              | Receptor signaling complex scaffold activity | Cytoplasm            | Adapter molecule                    | Cell communication;Signal transduction                           | -                   | Yes                      |
| IDH3B       | 3420    | isocitrate dehydrogenase [NAD] subunit beta, mitochondrial isoform a precursor             | NP_008830.2       | 3          | 7                 | 7          | 14     | 1.07                                                     | 0.53                                                     | 6.8                                                                                    | 50.18                                                                                  | 22.1                                                                                          | 93.7                                                                                          | 9                                                                              | 9                                                                              | 5163    | 3420           | isocitrate dehydrogenase 3 (NAD+) beta                                                 | Catalytic activity                           | Mitochondrion        | Enzyme;Dehydrogenase                | Metabolism;Energy pathways                                       | SP                  | Yes                      |
| PTPN14      | 5784    | tyrosine-protein phosphatase non-receptor type 14                                          | NP_005392.2       | 1          | 1                 | 1          | 2      | 1.06                                                     | 1.67                                                     |                                                                                        |                                                                                        |                                                                                               |                                                                                               | 1                                                                              | 1                                                                              | 4402    | 5784           | protein tyrosine phosphatase, non-receptor type 14                                     | Protein tyrosine phosphatase activity        | Cytoplasm            | Tyrosine phosphatase                | Cell communication;Signal transduction                           | B41;Tyr_Phosph      | Yes                      |
| PSPC1       | 55269   | paraspeckle component 1                                                                    | NP_001035879.1    | 1          | 6                 | 6          | 16     | 1.06                                                     | 1.47                                                     | 5.62                                                                                   | 7.79                                                                                   | 19.1                                                                                          | 37.5                                                                                          | 10                                                                             | 10                                                                             | 10172   | 55269          | paraspeckle component 1                                                                | RNA binding                                  | Nucleus              | RNA binding protein                 | Regulation of nucleobase, nucleotide and nucleic acid metabolism | CC;RRM              | Yes                      |
| PPID        | 5481    | peptidyl-prolyl cis-trans isomerase D                                                      | NP_005029.1       | 7          | 10                | 11         | 24     | 1.06                                                     | 1.45                                                     | 9.33                                                                                   | 3.87                                                                                   | 36.6                                                                                          | 20.5                                                                                          | 13                                                                             | 13                                                                             | 11875   | 5481           | peptidylprolyl isomerase D (cyclophilin D)                                             | Isomerase activity                           | Nucleolus            | Enzyme;Isomerase                    | Metabolism;Energy pathways                                       | TPR                 | Yes                      |
| PCMT1       | 5110    | protein-L-isoaspartate(D-aspartate) O-methyltransferase isoform 2                          | NP_001238978.1    | 5          | 5                 | 5          | 13     | 1.06                                                     | 1.45                                                     | 3.26                                                                                   | 8.58                                                                                   | 9.2                                                                                           | 33.9                                                                                          | 7                                                                              | 7                                                                              | 8908    | 5110           | protein-L-isoaspartate (D-aspartate)-O-methyltransferase                               | Methyltransferase activity                   | Cytoplasm            | Enzyme;Methyltransferase            | Protein metabolism                                               | -                   | Yes                      |
| DAZAP1      | 26528   | DAZ-associated protein 1 isoform b                                                         | NP_061832.2       | 2          | 2                 | 2          | 7      | 1.06                                                     | 1.37                                                     | 8.25                                                                                   | 6.22                                                                                   | 17.6                                                                                          | 17.1                                                                                          | 4                                                                              | 4                                                                              | 8462    | 26528          | DAZ associated protein 1                                                               | RNA binding                                  | Nucleus              | RNA binding protein                 | Regulation of nucleobase, nucleotide and nucleic acid metabolism | RRM                 | Yes                      |
| CRELD2      | 79174   | cysteine-rich with EGF-like domain protein 2 isoform a precursor                           | NP_001128573.1    | 4          | 3                 | 3          | 6      | 1.06                                                     | 1.34                                                     | 0.07                                                                                   | 8.25                                                                                   | 0.1                                                                                           | 19.4                                                                                          | 3                                                                              | 3                                                                              | 8455    | 79174          | None                                                                                   | Calcium ion binding                          | Extracellular        | Calcium binding protein             | Cell communication;Signal transduction                           | SP;EGFLEGFCA;EGF,FU | No                       |
| TAF6L       | 10629   | TAF6-like RNA polymerase II p300/CBP-associated factor-associated factor 65 kDa subunit 6L | NP_006464.1       | 1          | 3                 | 3          | 5      | 1.06                                                     | 1.34                                                     | 28.09                                                                                  | 9.37                                                                                   | 44.1                                                                                          | 17.8                                                                                          | 2                                                                              | 2                                                                              | 4253    | 10629          | TAF6-like RNA polymerase II p300/CBP-associated factor (PCAF)-associated factor, 65kDa | DNA-directed RNA polymerase activity         | Nucleus              | RNA polymerase                      | Regulation of nucleobase, nucleotide and nucleic acid metabolism | -                   | Yes                      |
| HDFG        | 3068    | hepatoma-derived growth factor isoform a                                                   | NP_004485.1       | 3          | 14                | 15         | 59     | 1.06                                                     | 1.32                                                     | 7.06                                                                                   | 8                                                                                      | 45.6                                                                                          | 68                                                                                            | 34                                                                             | 34                                                                             | 2079    | 3068           | hepatoma-derived growth factor (high-mobility group protein 1-like)                    | Growth factor activity                       | Nucleus              | Growth factor                       | Cell communication;Signal transduction                           | PWWP;NLS            | Yes                      |
| COMMD9      | 29099   | COMM domain-containing protein 9 isoform 1                                                 | NP_054905.2       | 3          | 2                 | 2          | 3      | 1.06                                                     | 1.31                                                     | 19.22                                                                                  | 12.85                                                                                  | 29.4                                                                                          | 24.2                                                                                          | 2                                                                              | 2                                                                              | 13087   | 29099          | COMM domain containing 9                                                               | Molecular function unknown                   | -                    | Unclassified                        | Biological process unknown                                       | SP                  | Yes                      |







Supplementary Table S1. List of quantified proteins in OKF6/TERT1-Smoke cells  
 Raingopaln *et al.*, 2017. Role of protein kinase N2 (PKN2) in cigarette smoke-mediated oncogenic transformation of oral cells

| Gene Symbol | Gene ID | Protein Description                                               | Protein Accession | # Proteins | # Unique Peptides | # Peptides | # PSMs | OKF6/TERT1-Smoke/<br>OKF6/TERT1-Parental<br>(130/126) R1 | OKF6/TERT1-Smoke/<br>OKF6/TERT1-Parental<br>(128/127) R2 | Ratio Standard Errors [%]:<br>OKF6/TERT1-Smoke/<br>OKF6/TERT1-Parental<br>(130/126) R1 | Ratio Standard Errors [%]:<br>OKF6/TERT1-Smoke/<br>OKF6/TERT1-Parental<br>(128/127) R2 | Ratio Variabilities [%]:<br>F13: OKF6/TERT1-<br>Smoke/<br>OKF6/TERT1-Parental<br>(130/126) R1 | Ratio Variabilities [%]:<br>F13: OKF6/TERT1-<br>Smoke/<br>OKF6/TERT1-Parental<br>(128/127) R2 | Ratio Counts: F13:<br>OKF6/TERT1-Smoke/<br>OKF6/TERT1-Parental<br>(130/126) R1 | Ratio Counts: F13:<br>OKF6/TERT1-Smoke/<br>OKF6/TERT1-Parental<br>(128/127) R2 | HPRD ID | Entrez Gene Id | Gene Name                                                                                       | Molecular Function                     | Primary Localization      | Molecular Class                     | Biological Process                                                           | Domains     | Plasma Proteome Database |
|-------------|---------|-------------------------------------------------------------------|-------------------|------------|-------------------|------------|--------|----------------------------------------------------------|----------------------------------------------------------|----------------------------------------------------------------------------------------|----------------------------------------------------------------------------------------|-----------------------------------------------------------------------------------------------|-----------------------------------------------------------------------------------------------|--------------------------------------------------------------------------------|--------------------------------------------------------------------------------|---------|----------------|-------------------------------------------------------------------------------------------------|----------------------------------------|---------------------------|-------------------------------------|------------------------------------------------------------------------------|-------------|--------------------------|
| RPL3        | 6122    | 60S ribosomal protein L3 isoform a                                | NP_000958.1       | 3          | 21                | 21         | 109    | 1.06                                                     | 0.68                                                     | 4.24                                                                                   | 8.91                                                                                   | 32.8                                                                                          | 44.7                                                                                          | 51                                                                             | 50                                                                             | 16042   | 6122           | ribosomal protein L3                                                                            | Structural constituent of ribosome     | Cytoplasm                 | Ribosomal subunit                   | Protein metabolism                                                           | -           | Yes                      |
| PDCD10      | 11235   | programmed cell death protein 10                                  | NP_009148.2       | 1          | 4                 | 4          | 8      | 1.06                                                     | 0.67                                                     | 2.93                                                                                   | 10.28                                                                                  | 7                                                                                             | 15.4                                                                                          | 5                                                                              | 5                                                                              | 10141   | 11235          | programmed cell death 10                                                                        | Molecular function unknown             | -                         | Unclassified                        | Apoptosis                                                                    | -           | No                       |
| RAB13       | 5872    | ras-related protein Rab-13 isoform 1                              | NP_002861.1       | 2          | 3                 | 4          | 21     | 1.06                                                     | 0.63                                                     | 2.55                                                                                   | 26                                                                                     | 4.7                                                                                           | 29                                                                                            | 3                                                                              | 3                                                                              | 4053    | 5872           | RAB13, member RAS oncogene family                                                               | GTPase activity                        | Cytoplasmic vesicle       | GTPase                              | Cell communication;Signal transduction                                       | RAB         | Yes                      |
| PIGS        | 94005   | GPI transamidase component PIG-S                                  | NP_149975.1       | 1          | 2                 | 2          | 9      | 1.05                                                     | 1.67                                                     | 4.12                                                                                   | 12.21                                                                                  | 8.7                                                                                           | 42.5                                                                                          | 4                                                                              | 4                                                                              | 15135   | 94005          | phosphatidylinositol glycan, class S                                                            | Cytoskeletal anchoring activity        | Microsome                 | Anchor protein                      | Cell growth and/or maintenance                                               | TM          | Yes                      |
| TFB1M       | 51106   | dimethyladenosine transferase 1, mitochondrial                    | NP_057104.2       | 1          | 4                 | 4          | 5      | 1.05                                                     | 1.46                                                     | 2.35                                                                                   | 8.64                                                                                   | 4.3                                                                                           | 22.1                                                                                          | 3                                                                              | 3                                                                              | 9515    | 51106          | transcription factor B1, mitochondrial                                                          | Transcription factor activity          | Mitochondrion             | Transcription factor                | Regulation of nucleobase, nucleoside, nucleotide and nucleic acid metabolism | -           | No                       |
| C18orf25    | 147339  | uncharacterized protein C18orf25 isoform a                        | NP_659492.1       | 2          | 1                 | 1          | 3      | 1.05                                                     | 1.4                                                      | 29.97                                                                                  | 12.01                                                                                  | 46.8                                                                                          | 24.2                                                                                          | 2                                                                              | 2                                                                              | 12690   | 147339         | chromosome 18 open reading frame 25                                                             | Molecular function unknown             | Nucleus;Cytoplasm         | Unclassified                        | Biological process unknown                                                   | -           | No                       |
| TBCB        | 1155    | tubulin-folding cofactor B isoform 1                              | NP_001272.2       | 2          | 7                 | 7          | 11     | 1.05                                                     | 1.36                                                     | 2                                                                                      | 1.73                                                                                   | 4.2                                                                                           | 4.7                                                                                           | 4                                                                              | 4                                                                              | 3196    | 1155           | cytoskeleton associated protein 1                                                               | Chaperone activity                     | Cytoplasm                 | Chaperone                           | Protein metabolism                                                           | -           | Yes                      |
| RPP14       | 11102   | ribonuclease P protein subunit p14                                | NP_008973.1       | 1          | 1                 | 1          | 2      | 1.05                                                     | 1.34                                                     |                                                                                        |                                                                                        |                                                                                               |                                                                                               | 1                                                                              | 1                                                                              | 18001   | 11102          | ribonuclease P 14kDa subunit                                                                    | Ribonuclease activity                  | Nucleus                   | Ribonuclease                        | Regulation of nucleobase, nucleoside, nucleotide and nucleic acid metabolism | -           | Yes                      |
| CPSF3       | 51692   | cleavage and polyadenylation specificity factor subunit 3         | NP_057291.1       | 1          | 3                 | 3          | 8      | 1.05                                                     | 1.33                                                     | 0.98                                                                                   | 3.54                                                                                   | 1.8                                                                                           | 8.2                                                                                           | 3                                                                              | 3                                                                              | 5825    | 51692          | cleavage and polyadenylation specific factor 3, 73kDa                                           | RNA binding                            | Nucleus                   | RNA binding protein                 | Regulation of nucleobase, nucleoside, nucleotide and nucleic acid metabolism | -           | No                       |
| GAR1        | 54433   | HACA ribonucleoprotein complex subunit 1                          | NP_061856.1       | 1          | 6                 | 6          | 11     | 1.05                                                     | 1.32                                                     | 4.15                                                                                   | 5.38                                                                                   | 12.4                                                                                          | 20.2                                                                                          | 8                                                                              | 8                                                                              | 7569    | 54433          | nuclear protein family A, member 1 (HACA)small nuclear RNPs                                     | Ribonucleoprotein                      | Nucleolus                 | Enzyme: Reductase                   | Regulation of nucleobase, nucleoside, nucleotide and nucleic acid metabolism | -           | Yes                      |
| UBE2E2      | 7325    | ubiquitin-conjugating enzyme E2 E2                                | NP_689866.1       | 1          | 1                 | 1          | 1      | 1.05                                                     | 1.31                                                     |                                                                                        |                                                                                        |                                                                                               |                                                                                               | 1                                                                              | 1                                                                              | 6779    | 7325           | ubiquitin-conjugating enzyme E2 E2 (UBC4/Stomolog yeast)                                        | Ubiquitin-specific protease activity   | -                         | Ubiquitin proteasome system protein | Protein metabolism                                                           | -           | Yes                      |
| MXRA7       | 439921  | matrix-remodeling-associated protein 7 isoform 1 precursor        | NP_001008528.1    | 3          | 2                 | 2          | 12     | 1.05                                                     | 1.26                                                     | 2.33                                                                                   | 2.97                                                                                   | 6                                                                                             | 9.2                                                                                           | 6                                                                              | 6                                                                              | 18199   | 439921         | None                                                                                            | Molecular function unknown             | -                         | Unclassified                        | Biological process unknown                                                   | TM          | Yes                      |
| PARK7       | 11315   | protein DJ-1                                                      | NP_009193.2       | 1          | 6                 | 6          | 17     | 1.05                                                     | 1.25                                                     | 5.16                                                                                   | 3.66                                                                                   | 15.4                                                                                          | 13                                                                                            | 8                                                                              | 8                                                                              | 3961    | 11315          | Parkinson disease (autosomal recessive, earlyonset) 7                                           | RNA binding                            | Cytoplasm                 | RNA binding protein                 | Regulation of nucleobase, nucleoside, nucleotide and nucleic acid metabolism | -           | Yes                      |
| TBC1D23     | 55773   | TBC1 domain family member 23 isoform 1                            | NP_001186127.1    | 2          | 3                 | 3          | 5      | 1.05                                                     | 1.23                                                     | 6.31                                                                                   | 13.82                                                                                  | 11.5                                                                                          | 30.2                                                                                          | 3                                                                              | 3                                                                              | 7727    | 55773          | None                                                                                            | Molecular function unknown             | -                         | Unclassified                        | Biological process unknown                                                   | TBC         | No                       |
| PLS1        | 5357    | plastin-1                                                         | NP_001165783.1    | 1          | 4                 | 7          | 31     | 1.05                                                     | 1.22                                                     | 13.17                                                                                  | 5.53                                                                                   | 43.4                                                                                          | 20.4                                                                                          | 9                                                                              | 9                                                                              | 4110    | 5357           | plastin 1 (I isoform)                                                                           | Structural constituent of cytoskeleton | Cytoplasm                 | Cytoskeletal protein                | Cell growth and/or maintenance                                               | EF;CH       | Yes                      |
| ARMC10      | 83787   | armadillo repeat-containing protein 10 isoform a                  | NP_114111.2       | 6          | 2                 | 2          | 3      | 1.05                                                     | 1.22                                                     |                                                                                        |                                                                                        |                                                                                               |                                                                                               | 1                                                                              | 1                                                                              | 18133   | 83787          | None                                                                                            | Molecular function unknown             | Endoplasmic reticulum     | Integral membrane protein           | Biological process unknown                                                   | TM          | No                       |
| RTCB        | 51493   | tRNA-splicing ligase RtcB homolog                                 | NP_055121.1       | 1          | 18                | 18         | 42     | 1.05                                                     | 1.22                                                     | 2.71                                                                                   | 5.59                                                                                   | 14                                                                                            | 34.4                                                                                          | 24                                                                             | 24                                                                             |         |                |                                                                                                 |                                        |                           |                                     |                                                                              |             |                          |
| HSPA4       | 3308    | heat shock 70 kDa protein 4                                       | NP_002145.3       | 1          | 52                | 56         | 272    | 1.05                                                     | 1.22                                                     | 3.1                                                                                    | 3.48                                                                                   | 37.2                                                                                          | 49.9                                                                                          | 123                                                                            | 123                                                                            | 9025    | 3308           | heat shock 70kDa protein 4                                                                      | Chaperone activity                     | Golgi apparatus;Cytoplasm | Chaperone                           | Protein metabolism                                                           | SP;CC       | Yes                      |
| HPRT1       | 3251    | hypoxanthine-guanine phosphoribosyltransferase                    | NP_000185.1       | 3          | 9                 | 9          | 40     | 1.05                                                     | 1.22                                                     | 4.53                                                                                   | 4.35                                                                                   | 22.6                                                                                          | 24.1                                                                                          | 22                                                                             | 20                                                                             | 2388    | 3251           | hypoxanthine phosphoribosyltransferase 1 (Lesch-Nyhan syndrome)                                 | Catalytic activity                     | Cytoplasm                 | Enzyme: Ribosyltransferase          | Metabolism;Energy pathways                                                   | -           | Yes                      |
| DCPS        | 28960   | mGpppX diphosphatase                                              | NP_054745.1       | 1          | 9                 | 9          | 18     | 1.05                                                     | 1.21                                                     | 5.06                                                                                   | 1.15                                                                                   | 16.9                                                                                          | 4.4                                                                                           | 10                                                                             | 10                                                                             | 16787   | 28960          | decapping enzyme, scavenger                                                                     | Hydrolase activity                     | Nucleus                   | Enzyme: Hydrolase                   | Metabolism;Energy pathways                                                   | -           | No                       |
| ARHGAP18    | 93663   | rho GTPase-activating protein 18                                  | NP_277050.2       | 1          | 5                 | 5          | 10     | 1.05                                                     | 1.21                                                     | 3.71                                                                                   | 1.67                                                                                   | 8.7                                                                                           | 4.5                                                                                           | 5                                                                              | 5                                                                              | 12474   | 93663          | Rho GTPase activating protein 18                                                                | GTPase activator activity              | -                         | GTPase activating protein           | Cell communication;Signal transduction                                       | RHOGAP      | Yes                      |
| BRD7        | 29117   | bromodomain-containing protein 7 isoform 1                        | NP_001167455.1    | 2          | 1                 | 1          | 2      | 1.05                                                     | 1.2                                                      |                                                                                        |                                                                                        |                                                                                               |                                                                                               | 1                                                                              | 1                                                                              | 12531   | 29117          | bromodomain containing 7                                                                        | Transcription regulator activity       | Nucleus                   | Transcription factor                | Regulation of cell cycle;Signal transduction                                 | BROMO;CC    | Yes                      |
| HARS2       | 23438   | probable histidine-tRNA ligase, mitochondrial isoform 1 precursor | NP_036340.1       | 3          | 1                 | 6          | 18     | 1.05                                                     | 1.2                                                      |                                                                                        |                                                                                        |                                                                                               |                                                                                               | 1                                                                              | 1                                                                              | 2871    | 23438          | histidyl-tRNA synthetase-like                                                                   | Ligase activity                        | Cytoplasm                 | Enzyme: Ligase                      | Protein metabolism                                                           | -           | Yes                      |
| PSME4       | 23198   | proteasome activator complex subunit 4                            | NP_055429.2       | 2          | 9                 | 9          | 20     | 1.05                                                     | 1.2                                                      | 8.36                                                                                   | 6.9                                                                                    | 26.8                                                                                          | 23.7                                                                                          | 9                                                                              | 8                                                                              | 9652    | 23198          | proteasome (prosome, macropain) activator subunit 4                                             | Ubiquitin-specific protease activity   | Nucleus                   | Ubiquitin proteasome system protein | Protein metabolism                                                           | CC;HEAT;NLS | No                       |
| OTUD4       | 54726   | OTU domain-containing protein 4 isoform 3                         | NP_001096123.1    | 1          | 7                 | 7          | 12     | 1.05                                                     | 1.19                                                     | 2.53                                                                                   | 1.06                                                                                   | 6.5                                                                                           | 3.1                                                                                           | 6                                                                              | 6                                                                              | 11033   | 54726          | None                                                                                            | Molecular function unknown             | Cytoplasm                 | Unclassified                        | Biological process unknown                                                   | -           | Yes                      |
| EXOC7       | 23265   | exocyst complex component 7 isoform 4                             | NP_001138769.1    | 7          | 4                 | 4          | 6      | 1.05                                                     | 1.19                                                     | 5.21                                                                                   | 18.1                                                                                   | 11                                                                                            | 45                                                                                            | 4                                                                              | 4                                                                              | 16292   | 23265          | exocyst complex component 7                                                                     | Molecular function unknown             | Cytoplasm                 | Unclassified                        | Biological process unknown                                                   | CC          | No                       |
| P4HA2       | 8974    | prolyl 4-hydroxylase subunit alpha-2 isoform 2 precursor          | NP_001136070.1    | 2          | 13                | 13         | 28     | 1.05                                                     | 1.18                                                     | 4.7                                                                                    | 2.86                                                                                   | 18.7                                                                                          | 12.7                                                                                          | 14                                                                             | 14                                                                             | 11862   | 8974           | procollagen-proline, 2-oxoglutarate-4-dioxygenase (proline 4-hydroxylase), alpha polypeptide II | Catalytic activity                     | Endoplasmic reticulum     | Enzyme: Hydroxylase                 | Metabolism;Energy pathways;Peptide metabolism                                | P4HC;SP     | Yes                      |



Supplementary Table S1. List of quantified proteins in OKF6/TERT1-Smoke cells  
 Raingonalan *et al.*, 2017. Role of protein kinase N2 (PKN2) in cigarette smoke-mediated oncogenic transformation of oral cells

| Gene Symbol | Gene ID | Protein Description                                                         | Protein Accession | # Proteins | # Unique Peptides | # Peptides | # PSMs | OKF6/TERT1-Smoke/<br>OKF6/TERT1-Parental<br>(130/126) R1 | OKF6/TERT1-Smoke/<br>OKF6/TERT1-Parental<br>(128/127) R2 | Ratio Standard Errors [%]:<br>OKF6/TERT1-Smoke/<br>OKF6/TERT1-Parental<br>(130/126) R1 | Ratio Standard Errors [%]:<br>OKF6/TERT1-Smoke/<br>OKF6/TERT1-Parental<br>(128/127) R2 | Ratio Variabilities [%]:<br>F13: OKF6/TERT1-<br>Smoke/<br>OKF6/TERT1-Parental<br>(130/126) R1 | Ratio Variabilities [%]:<br>F13: OKF6/TERT1-<br>Smoke/<br>OKF6/TERT1-Parental<br>(128/127) R2 | Ratio Counts: F13:<br>OKF6/TERT1-Smoke/<br>OKF6/TERT1-Parental<br>(130/126) R1 | Ratio Counts: F13:<br>OKF6/TERT1-Smoke/<br>OKF6/TERT1-Parental<br>(128/127) R2 | HPRD ID | Entrez Gene Id | Gene Name                                                    | Molecular Function                                          | Primary Localization         | Molecular Class                    | Biological Process                                                                 | Domains                        | Plasma Proteome Database |  |
|-------------|---------|-----------------------------------------------------------------------------|-------------------|------------|-------------------|------------|--------|----------------------------------------------------------|----------------------------------------------------------|----------------------------------------------------------------------------------------|----------------------------------------------------------------------------------------|-----------------------------------------------------------------------------------------------|-----------------------------------------------------------------------------------------------|--------------------------------------------------------------------------------|--------------------------------------------------------------------------------|---------|----------------|--------------------------------------------------------------|-------------------------------------------------------------|------------------------------|------------------------------------|------------------------------------------------------------------------------------|--------------------------------|--------------------------|--|
| TGFB2       | 7048    | TGF-beta receptor type-2 isoform A precursor                                | NP_001020018.1    | 2          | 2                 | 2          | 4      | 1.05                                                     | 1.07                                                     | 5.2                                                                                    | 1.46                                                                                   | 7.8                                                                                           | 2.2                                                                                           | 2                                                                              | 2                                                                              | 1823    | 7048           | transforming growth factor, beta receptor II(70/80kDa)       | Receptor signaling protein serine/threonine kinase activity | Extracellular matrix;Nucleus | Receptor serine/threonine kinase   | Signal transduction;Regulation of cell proliferation;Regulation of immune response | S_T_Kinase;TM;S_P;S_T_Y_Kinase | Yes                      |  |
| RPS6        | 6194    | 40S ribosomal protein S6                                                    | NP_001001.2       | 1          | 15                | 15         | 77     | 1.05                                                     | 1.07                                                     | 4.93                                                                                   | 5.58                                                                                   | 34.9                                                                                          | 40.8                                                                                          | 43                                                                             | 43                                                                             | 1592    | 6194           | ribosomal protein S6                                         | Structural constituent of ribosome                          | Ribosome                     | Ribosomal subunit                  | Protein metabolism                                                                 | CC                             | Yes                      |  |
| SLTM        | 79811   | SAFB-like transcription modulator isoform a                                 | NP_079031.2       | 2          | 8                 | 8          | 14     | 1.05                                                     | 1.06                                                     | 2.38                                                                                   | 4.19                                                                                   | 6.6                                                                                           | 11.8                                                                                          | 7                                                                              | 7                                                                              | 7819    | 79811          | None                                                         | Nucleic acid binding                                        | Nucleus                      | DNA binding protein                | Regulation of nucleobase, nucleotide and nucleic acid metabolism                   | CC;SAP;RRM                     | Yes                      |  |
| SART3       | 9733    | squamous cell carcinoma antigen recognized by T-cells 3                     | NP_055521.1       | 1          | 10                | 10         | 17     | 1.05                                                     | 1.06                                                     | 6.06                                                                                   | 6.3                                                                                    | 20.3                                                                                          | 21.4                                                                                          | 10                                                                             | 10                                                                             | 11552   | 9733           | squamous cell carcinoma antigen recognised by Tcells 3       | RNA binding                                                 | Nucleus                      | RNA binding protein                | Regulation of nucleobase, nucleotide and nucleic acid metabolism                   | HAT;CC;RRM                     | Yes                      |  |
| EEF1E1      | 9521    | eukaryotic translation elongation factor 1 epsilon-1 isoform 1              | NP_004271.1       | 2          | 5                 | 5          | 26     | 1.05                                                     | 1.06                                                     | 3.13                                                                                   | 3.36                                                                                   | 10.5                                                                                          | 11.3                                                                                          | 10                                                                             | 10                                                                             | 10931   | 9521           | eukaryotic translation elongation factor epsilon 1           | Translation regulator activity                              | Cytoplasm                    | Translation regulatory protein     | Protein metabolism                                                                 | -                              | Yes                      |  |
| GSPT1       | 2935    | eukaryotic peptide chain release factor GTP-binding subunit ERF3A isoform 1 | NP_002085.2       | 4          | 19                | 19         | 52     | 1.05                                                     | 1.06                                                     | 4.19                                                                                   | 4.99                                                                                   | 22.8                                                                                          | 27.6                                                                                          | 26                                                                             | 26                                                                             | 753     | 2935           | G1 to S phase transition 1                                   | GTPase activity                                             | Cytoplasm                    | Cell cycle control protein         | Cell communication;Signal transduction                                             | -                              | Yes                      |  |
| TRIP4       | 9325    | activating signal cointegrator 1                                            | NP_057297.2       | 1          | 8                 | 8          | 13     | 1.05                                                     | 1.06                                                     | 2.64                                                                                   | 6.25                                                                                   | 7.8                                                                                           | 18.8                                                                                          | 8                                                                              | 8                                                                              | 5140    | 9325           | thyroid hormone receptor interactor 4                        | Transcription regulator activity                            | Nucleus                      | Transcription regulatory protein   | Regulation of nucleobase, nucleotide and nucleic acid metabolism                   | -                              | Yes                      |  |
| HNRNPAB     | 3182    | heterogeneous nuclear ribonucleoprotein A/B isoform b                       | NP_004490.2       | 2          | 11                | 12         | 42     | 1.05                                                     | 1.04                                                     | 3.82                                                                                   | 9.87                                                                                   | 16.6                                                                                          | 44.5                                                                                          | 17                                                                             | 17                                                                             | 4067    | 3182           | heterogeneous nuclear ribonucleoprotein A/B                  | MRNA binding                                                | Nucleolus                    | Ribonucleoprotein                  | Regulation of nucleobase, nucleotide and nucleic acid metabolism                   | RRM                            | Yes                      |  |
| SND1        | 27044   | staphylococcal nuclease domain-containing protein 1                         | NP_055205.2       | 1          | 47                | 47         | 196    | 1.05                                                     | 1.04                                                     | 2.73                                                                                   | 3.24                                                                                   | 29.2                                                                                          | 34.4                                                                                          | 100                                                                            | 98                                                                             | 3714    | 27044          | None                                                         | Transcription regulator activity                            | Nucleus                      | Transcription regulatory protein   | Regulation of nucleobase, nucleotide and nucleic acid metabolism                   | TUDOR;NLS                      | Yes                      |  |
| DNMBP       | 23268   | dynammin-binding protein                                                    | NP_056036.1       | 1          | 7                 | 7          | 12     | 1.05                                                     | 1.03                                                     | 12.2                                                                                   | 2.42                                                                                   | 29.1                                                                                          | 5.6                                                                                           | 5                                                                              | 5                                                                              | 10918   | 23268          | dynammin binding protein                                     | Guanyl-nucleotide exchange factor activity                  | Extracellular                | Guanine nucleotide exchange factor | Cell communication;Signal transduction                                             | SH3;CC;RHOGEF;BAR              | Yes                      |  |
| PNKP        | 11284   | bifunctional polynucleotide phosphatase/kinase                              | NP_009185.2       | 1          | 3                 | 3          | 4      | 1.05                                                     | 1.03                                                     |                                                                                        |                                                                                        |                                                                                               |                                                                                               | 1                                                                              | 1                                                                              | 9284    | 11284          | polynucleotide kinase 3'-phosphatase                         | DNA repair protein                                          | Nucleus                      | DNA binding protein                | Regulation of nucleobase, nucleotide and nucleic acid metabolism                   | FHA;NLS                        | Yes                      |  |
| DERL2       | 51009   | derlin-2 isoform a                                                          | NP_057125.2       | 2          | 1                 | 1          | 6      | 1.05                                                     | 1.03                                                     |                                                                                        |                                                                                        |                                                                                               |                                                                                               | 1                                                                              | 1                                                                              | 16796   | 51009          | Der1-like domain family, member 2                            | Molecular function unknown                                  | Endoplasmic reticulum        | Integral membrane protein          | Biological process unknown                                                         | TM                             | No                       |  |
| FAM20B      | 9917    | glycosaminoglycan xylosylkinase                                             | NP_055679.1       | 1          | 3                 | 3          | 5      | 1.05                                                     | 1.03                                                     | 16.45                                                                                  | 8.62                                                                                   | 30.7                                                                                          | 15.5                                                                                          | 3                                                                              | 3                                                                              | 13297   | 9917           | family with sequence similarity 20, member B                 | Molecular function unknown                                  | Extracellular                | Secreted polypeptide               | Biological process unknown                                                         | SP                             | Yes                      |  |
| ABCE1       | 6059    | ATP-binding cassette sub-family E member 1                                  | NP_002931.2       | 1          | 20                | 20         | 71     | 1.05                                                     | 0.99                                                     | 3.12                                                                                   | 3.18                                                                                   | 21.2                                                                                          | 20.5                                                                                          | 41                                                                             | 41                                                                             | 3132    | 6059           | ATP-binding cassette, sub-family E (OABP), member 1          | Transporter activity                                        | Cytoplasm                    | Transport/cargo protein            | Transport                                                                          | AAA                            | Yes                      |  |
| NCOR2       | 9612    | nuclear receptor corepressor 2 isoform 1                                    | NP_006303.4       | 3          | 3                 | 3          | 4      | 1.05                                                     | 0.99                                                     | 0.99                                                                                   | 3.62                                                                                   | 1.8                                                                                           | 6.2                                                                                           | 3                                                                              | 3                                                                              | 2910    | 9612           | nuclear receptor co-repressor 2                              | Transcription regulator activity                            | Nucleus                      | Transcription regulatory protein   | Regulation of nucleobase, nucleotide and nucleic acid metabolism                   | SANT;CC                        | Yes                      |  |
| DIEXF       | 27042   | digestive organ expansion factor homolog                                    | NP_055203.4       | 1          | 6                 | 6          | 11     | 1.05                                                     | 0.98                                                     | 4.56                                                                                   | 2.86                                                                                   | 10.7                                                                                          | 6.3                                                                                           | 5                                                                              | 5                                                                              |         |                |                                                              |                                                             |                              |                                    |                                                                                    |                                |                          |  |
| NSF         | 4905    | vesicle-fusing ATPase                                                       | NP_006169.2       | 1          | 9                 | 9          | 19     | 1.05                                                     | 0.98                                                     | 3.03                                                                                   | 3.59                                                                                   | 9.5                                                                                           | 10.6                                                                                          | 9                                                                              | 9                                                                              | 3380    | 4905           | N-ethylmaleimide-sensitive factor                            | ATPase activity                                             | Cytoplasm                    | ATPase                             | Metabolism;Energy pathways                                                         | AAA                            | Yes                      |  |
| ARFGAP2     | 84364   | ADP-ribosylation factor GTPase-activating protein 2 isoform 1               | NP_115765.2       | 2          | 10                | 10         | 25     | 1.05                                                     | 0.98                                                     | 4.59                                                                                   | 5.87                                                                                   | 16.9                                                                                          | 20.1                                                                                          | 12                                                                             | 12                                                                             | 6069    | 84364          | zinc finger protein 289, ID1 regulated                       | GTPase activator activity                                   | Nucleus                      | GTPase activating protein          | Cell communication;Signal transduction                                             | ARFGAP;CC                      | No                       |  |
| FARSA       | 2193    | phenylalanine-tRNA ligase alpha subunit                                     | NP_004452.1       | 1          | 15                | 15         | 35     | 1.05                                                     | 0.98                                                     | 3.69                                                                                   | 9.62                                                                                   | 17                                                                                            | 42.8                                                                                          | 19                                                                             | 19                                                                             | 4227    | 2193           | phenylalanine-tRNA synthetase-like, alpha subunit            | Ligase activity                                             | Cytoplasm                    | Enzyme; Ligase                     | Protein metabolism                                                                 | -                              | Yes                      |  |
| ITGA2       | 3673    | integrin alpha 2 precursor                                                  | NP_002194.2       | 1          | 29                | 29         | 143    | 1.05                                                     | 0.98                                                     | 2.28                                                                                   | 2.99                                                                                   | 19.8                                                                                          | 24.4                                                                                          | 67                                                                             | 67                                                                             | 1893    | 3673           | integrin, alpha 2 (CD49B, alpha 2 subunit of VLA-2 receptor) | Receptor activity                                           | Plasma membrane              | Cell surface receptor              | Cell communication;Signal transduction                                             | TM;INTA;VWA;SP                 | Yes                      |  |
| GSDMD       | 79792   | gasdermin-D                                                                 | NP_079012.3       | 1          | 2                 | 2          | 3      | 1.05                                                     | 0.97                                                     | 1.99                                                                                   | 24.77                                                                                  | 3                                                                                             | 34.9                                                                                          | 2                                                                              | 2                                                                              | 11014   | 79792          | gasdermin domain containing 1                                | Molecular function unknown                                  | -                            | Unclassified                       | Biological process unknown                                                         | -                              | Yes                      |  |
| YTHDF3      | 253943  | YTH domain-containing family protein 3 isoform b                            | NP_001264743.1    | 3          | 6                 | 10         | 19     | 1.05                                                     | 0.96                                                     | 5.35                                                                                   | 12.29                                                                                  | 13.8                                                                                          | 29.4                                                                                          | 6                                                                              | 6                                                                              | 8106    | 253943         | YTH domain family, member 3                                  | Molecular function unknown                                  | -                            | Unclassified                       | Biological process unknown                                                         | -                              | Yes                      |  |
| AIDA        | 64853   | axin interactor, dorsalization-associated protein                           | NP_073742.2       | 1          | 6                 | 6          | 12     | 1.05                                                     | 0.96                                                     | 3.19                                                                                   | 17.67                                                                                  | 8.3                                                                                           | 47.3                                                                                          | 6                                                                              | 7                                                                              | 7798    | 64853          | chromosome 1 open reading frame 80                           | Molecular function unknown                                  | -                            | Unclassified                       | Biological process unknown                                                         | -                              | Yes                      |  |
| OCLAD1      | 54940   | OCLAD domain-containing protein 1 isoform 4                                 | NP_001161726.1    | 4          | 6                 | 6          | 27     | 1.05                                                     | 0.96                                                     | 8.81                                                                                   | 13.63                                                                                  | 37.2                                                                                          | 54.1                                                                                          | 15                                                                             | 15                                                                             | 17654   | 54940          | OCLAD domain containing 1                                    | Molecular function unknown                                  | Nucleus;Cytoplasm            | Unclassified                       | Biological process unknown                                                         | -                              | Yes                      |  |



Supplementary Table S1. List of quantified proteins in OKF6/TERT1-Smoke cells  
 Raigopalani *et al.*, 2017. Role of protein kinase N2 (PKN2) in cigarette smoke-mediated oncogenic transformation of oral cells

| Gene Symbol | Gene ID | Protein Description                                                            | Protein Accession | # Proteins | # Unique Peptides | # Peptides | # PSMs | OKF6/TERT1-Smoke/<br>OKF6/TERT1-Parental<br>(130/126) R1 | OKF6/TERT1-Smoke/<br>OKF6/TERT1-Parental<br>(128/127) R2 | Ratio Standard Errors [%]:<br>OKF6/TERT1-Smoke/<br>OKF6/TERT1-Parental<br>(130/126) R1 | Ratio Standard Errors [%]:<br>OKF6/TERT1-Smoke/<br>OKF6/TERT1-Parental<br>(128/127) R2 | Ratio Variabilities [%]:<br>F13: OKF6/TERT1-<br>Smoke/<br>OKF6/TERT1-Parental<br>(130/126) R1 | Ratio Variabilities [%]:<br>F13: OKF6/TERT1-<br>Smoke/<br>OKF6/TERT1-Parental<br>(128/127) R2 | Ratio Counts: F13:<br>OKF6/TERT1-Smoke/<br>OKF6/TERT1-Parental<br>(130/126) R1 | Ratio Counts: F13:<br>OKF6/TERT1-Smoke/<br>OKF6/TERT1-Parental<br>(128/127) R2 | HPRD ID | Entrez Gene ID | Gene Name                                                              | Molecular Function                                         | Primary Localization | Molecular Class                     | Biological Process                                                                             | Domains               | Plasma Proteome Database |
|-------------|---------|--------------------------------------------------------------------------------|-------------------|------------|-------------------|------------|--------|----------------------------------------------------------|----------------------------------------------------------|----------------------------------------------------------------------------------------|----------------------------------------------------------------------------------------|-----------------------------------------------------------------------------------------------|-----------------------------------------------------------------------------------------------|--------------------------------------------------------------------------------|--------------------------------------------------------------------------------|---------|----------------|------------------------------------------------------------------------|------------------------------------------------------------|----------------------|-------------------------------------|------------------------------------------------------------------------------------------------|-----------------------|--------------------------|
| TUBGCP5     | 114791  | gamma-tubulin complex component 5 isoform a                                    | NP_443135.3       | 2          | 2                 | 2          | 4      | 1.05                                                     | 0.69                                                     | 13.14                                                                                  | 38.22                                                                                  | 19.6                                                                                          | 38.7                                                                                          | 2                                                                              | 2                                                                              | 12177   | 114791         | tubulin, gamma complex associated protein 5                            | Structural constituent of cytoskeleton                     | Centrosome           | Cytoskeletal protein                | Cell growth and/or maintenance                                                                 | -                     | Yes                      |
| DYNLT1      | 6993    | dyncin light chain Tctex-type 1 isoform 1                                      | NP_006510.1       | 3          | 2                 | 2          | 3      | 1.05                                                     | 0.55                                                     |                                                                                        |                                                                                        |                                                                                               |                                                                                               | 1                                                                              | 1                                                                              | 15987   | 6993           | t-complex-associated-testis-expressed 1-like 1                         | Molecular function unknown                                 | Cytoplasm            | Unclassified                        | Biological_process unknown                                                                     | -                     | Yes                      |
| H2AFX       | 3014    | histone H2AX                                                                   | NP_002096.1       | 2          | 3                 | 9          | 36     | 1.04                                                     | 1.82                                                     | 21.86                                                                                  | 15.65                                                                                  | 33.1                                                                                          | 42.1                                                                                          | 2                                                                              | 2                                                                              | 3465    | 3014           | H2A histone family, member X                                           | DNA binding                                                | Nucleus              | DNA binding protein                 | DNA repair                                                                                     | -                     | Yes                      |
| CDCP1       | 64866   | CUB domain-containing protein 1 isoform 1 precursor                            | NP_073753.3       | 2          | 8                 | 8          | 21     | 1.04                                                     | 1.46                                                     | 5.53                                                                                   | 2.44                                                                                   | 19.3                                                                                          | 11.8                                                                                          | 11                                                                             | 11                                                                             | 16696   | 64866          | CUB domain containing protein 1                                        | Molecular function unknown;Cell adhesion molecule activity | Plasma membrane      | Adhesion molecule;Unclassified      | Cell communication;Signal transduction;Cell adhesion;Cell-cell adhesion                        | SP;CUB;TM             | No                       |
| SMYD5       | 10322   | SET and MYND domain-containing protein 5                                       | NP_006053.2       | 1          | 2                 | 2          | 3      | 1.04                                                     | 1.43                                                     |                                                                                        |                                                                                        |                                                                                               |                                                                                               | 1                                                                              | 1                                                                              | 18080   | 10322          | SMYD family member 5                                                   | Methyltransferase activity                                 | -                    | Enzyme;Methyltransferase            | Regulation of nucleobase, nucleoside, nucleotide and nucleic acid metabolism                   | SET                   | No                       |
| HPCAL1      | 3241    | hippocalin-like protein 1                                                      | NP_002140.2       | 2          | 6                 | 6          | 10     | 1.04                                                     | 1.42                                                     | 3.28                                                                                   | 0.98                                                                                   | 7.7                                                                                           | 3.1                                                                                           | 5                                                                              | 5                                                                              | 2564    | 3241           | hippocalin-like 1                                                      | Calcium ion binding                                        | Cytoplasm            | Calcium binding protein             | Cell communication;Signal transduction                                                         | EF                    | Yes                      |
| SRP54       | 6729    | signal recognition particle 54 kDa protein isoform 1                           | NP_003127.1       | 2          | 13                | 13         | 30     | 1.04                                                     | 1.32                                                     | 11.33                                                                                  | 16.16                                                                                  | 49.9                                                                                          | 103.8                                                                                         | 16                                                                             | 16                                                                             | 5330    | 6729           | signal recognition particle 54kDa                                      | RNA binding                                                | Cytoplasm            | RNA binding protein                 | Protein metabolism                                                                             | AAA                   | Yes                      |
| PPP2R5B     | 5526    | serine/threonine-protein phosphatase 2A 56 kDa regulatory subunit beta isoform | NP_006235.1       | 1          | 1                 | 2          | 2      | 1.04                                                     | 1.31                                                     |                                                                                        |                                                                                        |                                                                                               |                                                                                               | 1                                                                              | 1                                                                              | 9038    | 5526           | protein phosphatase 2, regulatory subunit B( $\beta$ 56), beta isoform | Protein serine/threonine phosphatase activity              | Cytoplasm            | Serine/threonine phosphatase        | Cell communication;Signal transduction                                                         | -                     | Yes                      |
| G3BP2       | 9908    | ras GTPase-activating protein-binding protein 2 isoform b                      | NP_987100.1       | 2          | 13                | 13         | 38     | 1.04                                                     | 1.3                                                      | 6.21                                                                                   | 6.28                                                                                   | 29.6                                                                                          | 37.7                                                                                          | 20                                                                             | 20                                                                             | 6570    | 9908           | None                                                                   | Molecular function unknown                                 | Cytoplasm;Nucleus    | Unclassified                        | Cell communication;Signal transduction                                                         | RRM                   | Yes                      |
| PFAS        | 5198    | phosphoribosylformylglycinamide synthase                                       | NP_036525.1       | 1          | 19                | 19         | 38     | 1.04                                                     | 1.29                                                     | 5.51                                                                                   | 5.12                                                                                   | 26.6                                                                                          | 31                                                                                            | 21                                                                             | 21                                                                             | 9072    | 5198           | phosphoribosylformylglycinamide synthase (FGARamidotransferase)        | Ligase activity                                            | Cytoplasm            | Enzyme;Synthase                     | Metabolism;Energy pathways                                                                     | -                     | Yes                      |
| TUSC1       | 286319  | tumor suppressor candidate gene 1 protein                                      | NP_001004125.1    | 1          | 1                 | 1          | 2      | 1.04                                                     | 1.28                                                     |                                                                                        |                                                                                        |                                                                                               |                                                                                               | 1                                                                              | 1                                                                              | 18247   | 286319         | tumor suppressor candidate 1                                           | Molecular function unknown                                 | Nucleus;Cytoplasm    | Unclassified                        | Biological_process unknown                                                                     | CC                    | No                       |
| DDX1        | 1653    | ATP-dependent RNA helicase DDX1                                                | NP_004930.1       | 1          | 19                | 19         | 53     | 1.04                                                     | 1.28                                                     | 4.11                                                                                   | 5.26                                                                                   | 23.7                                                                                          | 38.2                                                                                          | 30                                                                             | 30                                                                             | 3158    | 1653           | DEAD (Asp-Glu-Ala-Asp) box polypeptide 1                               | RNA binding                                                | Nucleus              | RNA binding protein                 | Regulation of nucleobase, nucleoside, nucleotide and nucleic acid metabolism                   | DEXDc;HELIC           | Yes                      |
| RPL23       | 9349    | 60S ribosomal protein L23                                                      | NP_000969.1       | 1          | 8                 | 8          | 79     | 1.04                                                     | 1.23                                                     | 5.75                                                                                   | 5.74                                                                                   | 38.2                                                                                          | 45.8                                                                                          | 38                                                                             | 38                                                                             | 4716    | 9349           | ribosomal protein L23                                                  | Structural constituent of ribosome                         | Ribosome             | Ribosomal subunit                   | Protein metabolism                                                                             | -                     | Yes                      |
| PSMD11      | 5717    | 26S proteasome non-ATPase regulatory subunit 11                                | NP_001257411.1    | 1          | 23                | 23         | 86     | 1.04                                                     | 1.23                                                     | 3.43                                                                                   | 3.44                                                                                   | 25.1                                                                                          | 29.6                                                                                          | 48                                                                             | 47                                                                             | 5119    | 5717           | proteasome (prosome, macropain) 26S subunit, non-ATPase, 11            | Ubiquitin-specific protease activity                       | Cytoplasm            | Ubiquitin proteasome system protein | Protein metabolism                                                                             | PINT                  | Yes                      |
| RQCD1       | 9125    | cell differentiation protein RCD1 homolog isoform 2                            | NP_005435.1       | 3          | 4                 | 4          | 9      | 1.04                                                     | 1.23                                                     | 6.78                                                                                   | 8.72                                                                                   | 14.1                                                                                          | 21.8                                                                                          | 4                                                                              | 4                                                                              | 8828    | 9125           | RCD1 required for cell differentiation1 homolog(S. pombe)              | Transcription regulator activity                           | Nucleus              | Transcription regulatory protein    | Regulation of nucleobase, nucleoside, nucleotide and nucleic acid metabolism                   | -                     | No                       |
| RRP7A       | 27341   | ribosomal RNA-processing protein 7 homolog A                                   | NP_056518.2       | 1          | 3                 | 3          | 6      | 1.04                                                     | 1.2                                                      | 4.58                                                                                   | 1.53                                                                                   | 9.5                                                                                           | 3.7                                                                                           | 4                                                                              | 4                                                                              | 13043   | 27341          | None                                                                   | RNA binding                                                | Nucleolus            | RNA binding protein                 | Regulation of nucleobase, nucleoside, nucleotide and nucleic acid metabolism                   | RRM;CC                | Yes                      |
| ZC3H18      | 124245  | zinc finger CCCH domain-containing protein 18 isoform 1                        | NP_001281269.1    | 2          | 9                 | 9          | 12     | 1.04                                                     | 1.19                                                     | 6.82                                                                                   | 3.39                                                                                   | 18.9                                                                                          | 10.7                                                                                          | 7                                                                              | 7                                                                              | 11232   | 124245         | None                                                                   | Molecular function unknown                                 | -                    | Unclassified                        | Biological_process unknown                                                                     | CC;ZnF_C3H1           | Yes                      |
| TSR1        | 55720   | pre-rRNA-processing protein TSR1 homolog                                       | NP_060598.3       | 1          | 10                | 10         | 19     | 1.04                                                     | 1.17                                                     | 6.27                                                                                   | 22.46                                                                                  | 19.7                                                                                          | 93.1                                                                                          | 9                                                                              | 9                                                                              | 7681    | 55720          | None                                                                   | Molecular function unknown                                 | Nucleus              | Unclassified                        | Biological_process unknown                                                                     | -                     | No                       |
| DNM1L       | 10059   | dynamin-1-like protein isoform 1                                               | NP_036192.2       | 6          | 1                 | 27         | 108    | 1.04                                                     | 1.17                                                     |                                                                                        |                                                                                        |                                                                                               |                                                                                               | 1                                                                              | 1                                                                              | 4833    | 10059          | dynamin 1-like                                                         | GTPase activity                                            | Cytoplasm            | GTPase                              | Mitochondrion organization and biogenesis                                                      | DYNC;GED              | Yes                      |
| PRDX4       | 10549   | peroxiredoxin-4 precursor                                                      | NP_006397.1       | 1          | 4                 | 6          | 16     | 1.04                                                     | 1.17                                                     | 9.57                                                                                   | 20.17                                                                                  | 20.1                                                                                          | 50                                                                                            | 4                                                                              | 4                                                                              | 5935    | 10549          | peroxiredoxin 4                                                        | Peroxidase activity                                        | Cytoplasm            | Enzyme;Peroxidase                   | Metabolism;Energy pathways                                                                     | SP                    | Yes                      |
| LASP1       | 3927    | LIM and SH3 domain protein 1 isoform a                                         | NP_006139.1       | 2          | 8                 | 8          | 14     | 1.04                                                     | 1.17                                                     | 8.34                                                                                   | 7.61                                                                                   | 23.2                                                                                          | 24                                                                                            | 7                                                                              | 7                                                                              | 4229    | 3927           | LIM and SH3 protein 1                                                  | Cytoskeletal protein binding                               | Focal adhesion       | Cytoskeletal associated protein     | Signal transduction;Regulation of signal transduction;Cytoskeleton organization and biogenesis | LIM;NEBULIN;SH3       | Yes                      |
| RRAS2       | 22800   | ras-related protein R-Ras2 isoform a                                           | NP_036382.2       | 3          | 4                 | 6          | 25     | 1.04                                                     | 1.15                                                     | 0.83                                                                                   | 9.63                                                                                   | 1.9                                                                                           | 25.2                                                                                          | 5                                                                              | 5                                                                              | 2518    | 22800          | related RAS viral (r-ras) oncogene homolog 2                           | GTPase activity                                            | Plasma membrane      | GTPase                              | Cell communication;Signal transduction                                                         | RAS;CAAX;Small_GTPase | No                       |
| UZSURP      | 23350   | U2 snRNP-associated SURP motif-containing protein                              | NP_001073884.1    | 1          | 8                 | 8          | 16     | 1.04                                                     | 1.15                                                     | 6.92                                                                                   | 14.24                                                                                  | 19.2                                                                                          | 45.4                                                                                          | 7                                                                              | 7                                                                              |         |                |                                                                        |                                                            |                      |                                     |                                                                                                |                       |                          |
| SLC27A4     | 10999   | long-chain fatty acid transport protein 4                                      | NP_005085.2       | 1          | 6                 | 6          | 11     | 1.04                                                     | 1.14                                                     | 4.12                                                                                   | 2.7                                                                                    | 11.4                                                                                          | 8.2                                                                                           | 7                                                                              | 7                                                                              | 9172    | 10999          | solute carrier family 27 (fatty acid transporter), member 4            | Auxiliary transport protein activity                       | Plasma membrane      | Membrane transport protein          | Transport                                                                                      | TM                    | No                       |
| SYNCRIP     | 10492   | heterogeneous nuclear ribonucleoprotein Q isoform 1                            | NP_006363.4       | 7          | 23                | 32         | 140    | 1.04                                                     | 1.14                                                     | 4.64                                                                                   | 3.22                                                                                   | 37.2                                                                                          | 28.1                                                                                          | 56                                                                             | 56                                                                             | 6734    | 10492          | synaptotagmin binding, cytoplasmic RNAinteracting protein              | RNA binding                                                | Cytoplasm            | RNA binding protein                 | Regulation of nucleobase, nucleoside, nucleotide and nucleic acid metabolism                   | RRM                   | Yes                      |

Supplementary Table S1. List of quantified proteins in OKF6/TERT1-Smoke cells  
Raignanalan *et al.*, 2017. Role of protein kinase N2 (PKN2) in cigarette smoke-mediated oncogenic transformation of oral cells

| Gene Symbol | Gene ID | Protein Description                                                           | Protein Accession | # Proteins | # Unique Peptides | # Peptides | # PSMs | OKF6/TERT1-Smoke/<br>OKF6/TERT1-Parental<br>(130/126) R1 | OKF6/TERT1-Smoke/<br>OKF6/TERT1-Parental<br>(128/127) R2 | Ratio Standard Errors [%]:<br>OKF6/TERT1-Smoke/<br>OKF6/TERT1-Parental<br>(130/126) R1 | Ratio Standard Errors [%]:<br>OKF6/TERT1-Smoke/<br>OKF6/TERT1-Parental<br>(128/127) R2 | Ratio Variabilities [%]:<br>F13: OKF6/TERT1-<br>Smoke/<br>OKF6/TERT1-Parental<br>(130/126) R1 | Ratio Variabilities [%]:<br>F13: OKF6/TERT1-<br>Smoke/<br>OKF6/TERT1-Parental<br>(128/127) R2 | Ratio Counts: F13:<br>OKF6/TERT1-Smoke/<br>OKF6/TERT1-Parental<br>(130/126) R1 | Ratio Counts: F13:<br>OKF6/TERT1-Smoke/<br>OKF6/TERT1-Parental<br>(128/127) R2 | HFPRD ID | Entrez Gene ID | Gene Name                                                           | Molecular Function                              | Primary Localization  | Molecular Class                     | Biological Process                                                                                 | Domains                | Plasma Proteome Database |
|-------------|---------|-------------------------------------------------------------------------------|-------------------|------------|-------------------|------------|--------|----------------------------------------------------------|----------------------------------------------------------|----------------------------------------------------------------------------------------|----------------------------------------------------------------------------------------|-----------------------------------------------------------------------------------------------|-----------------------------------------------------------------------------------------------|--------------------------------------------------------------------------------|--------------------------------------------------------------------------------|----------|----------------|---------------------------------------------------------------------|-------------------------------------------------|-----------------------|-------------------------------------|----------------------------------------------------------------------------------------------------|------------------------|--------------------------|
| MLEC        | 9761    | malectin isoform1 precursor                                                   | NP_055545.1       | 3          | 8                 | 8          | 16     | 1.04                                                     | 1.13                                                     | 6.11                                                                                   | 12.44                                                                                  | 18.2                                                                                          | 41.2                                                                                          | 8                                                                              | 8                                                                              | 13781    | 9761           | KIAA0152                                                            | Molecular function unknown                      | Integral to membrane  | Unclassified                        | Biological processes unknown                                                                       | SP,CC,TM               | Yes                      |
| RPL11       | 6135    | 60S ribosomal protein L11 isoform 1                                           | NP_000966.2       | 2          | 4                 | 4          | 25     | 1.04                                                     | 1.13                                                     | 9.19                                                                                   | 2.86                                                                                   | 32.4                                                                                          | 10.7                                                                                          | 11                                                                             | 11                                                                             | 10364    | 6135           | ribosomal protein L11                                               | Structural constituent of ribosome              | Ribosome              | Ribosomal subunit                   | Protein metabolism                                                                                 | -                      | Yes                      |
| SNF8        | 11267   | vacuolar-sorting protein SNF8                                                 | NP_009172.2       | 1          | 3                 | 3          | 4      | 1.04                                                     | 1.11                                                     | 2.68                                                                                   | 8.91                                                                                   | 4.8                                                                                           | 17.3                                                                                          | 3                                                                              | 3                                                                              | 16847    | 11267          | None                                                                | Transcription regulator activity                | -                     | Transcription regulatory protein    | Regulation of nucleobase, nucleoside and nucleic acid metabolism                                   | CC                     | No                       |
| TRIM3       | 10612   | tripartite motif-containing protein 3 isoform 1                               | NP_006449.2       | 2          | 1                 | 1          | 2      | 1.04                                                     | 1.11                                                     |                                                                                        |                                                                                        |                                                                                               |                                                                                               | 1                                                                              | 1                                                                              | 5690     | 10612          | tripartite motif-containing 3                                       | Metal ion binding                               | Cytoplasm             | Anchor protein                      | Cell growth and/or maintenance                                                                     | RNG,BBOX,BB C,IGFLN,CC | Yes                      |
| RPS14       | 6208    | 40S ribosomal protein S14                                                     | NP_005608.1       | 1          | 8                 | 8          | 37     | 1.04                                                     | 1.1                                                      | 8.87                                                                                   | 6.68                                                                                   | 44.2                                                                                          | 34.5                                                                                          | 21                                                                             | 21                                                                             | 562      | 6208           | ribosomal protein S14                                               | Structural constituent of ribosome              | Ribosome              | Ribosomal subunit                   | Protein metabolism                                                                                 | -                      | Yes                      |
| PAK2        | 5062    | serine/threonine-protein kinase PAK 2                                         | NP_002568.2       | 6          | 14                | 18         | 59     | 1.04                                                     | 1.1                                                      | 3.34                                                                                   | 6.41                                                                                   | 18.5                                                                                          | 38.8                                                                                          | 28                                                                             | 28                                                                             | 5428     | 5062           | p21 (CDKN1A)-activated kinase 2                                     | Protein serine/threonine kinase activity        | Endoplasmic reticulum | Serine/threonine kinase             | Cell communication; Signal transduction                                                            | S_T_kinase;PBD         | Yes                      |
| APEH        | 327     | acylamino-acid-releasing enzyme                                               | NP_001631.3       | 1          | 17                | 17         | 69     | 1.04                                                     | 1.09                                                     | 5.18                                                                                   | 2.73                                                                                   | 31.8                                                                                          | 17.1                                                                                          | 33                                                                             | 33                                                                             | 34       | 327            | N-acylaminoacyl-peptide hydrolase                                   | Hydrolase activity                              | Cytoplasm             | Enzyme: Hydrolase                   | Metabolism;Energy pathways                                                                         | -                      | Yes                      |
| BRD3        | 8019    | bromodomain-containing protein 3                                              | NP_031397.1       | 1          | 8                 | 9          | 14     | 1.04                                                     | 1.09                                                     | 4.85                                                                                   | 8.69                                                                                   | 14.3                                                                                          | 27.2                                                                                          | 8                                                                              | 8                                                                              | 3327     | 8019           | bromodomain containing 3                                            | Transcription regulator activity                | Nucleus               | Transcription regulatory protein    | Regulation of nucleobase, nucleoside and nucleic acid metabolism                                   | BROMO,CC               | Yes                      |
| LRPPRC      | 10128   | leucine-rich PPR motif-containing protein, mitochondrial precursor            | NP_573566.2       | 1          | 69                | 69         | 231    | 1.04                                                     | 1.09                                                     | 2.14                                                                                   | 3.13                                                                                   | 24.8                                                                                          | 38.8                                                                                          | 120                                                                            | 120                                                                            | 6343     | 10128          | leucine-rich PPR-motif containing                                   | RNA binding                                     | Nucleus               | RNA binding protein                 | Regulation of nucleobase, nucleoside and nucleic acid metabolism                                   | CC                     | Yes                      |
| WDR44       | 54521   | WD repeat-containing protein 44 isoform 1                                     | NP_061918.3       | 3          | 7                 | 7          | 9      | 1.04                                                     | 1.08                                                     | 5.53                                                                                   | 6.51                                                                                   | 14.2                                                                                          | 17.4                                                                                          | 6                                                                              | 6                                                                              | 11682    | 54521          | WD repeat domain 44                                                 | Transporter activity                            | Cytoplasm             | Transport/cargo protein             | Transport                                                                                          | WD40                   | Yes                      |
| EIF4G2      | 1982    | eukaryotic translation initiation factor 4 gamma 2 isoform 1                  | NP_001409.3       | 2          | 25                | 25         | 64     | 1.04                                                     | 1.07                                                     | 6.33                                                                                   | 5.97                                                                                   | 40.7                                                                                          | 39.2                                                                                          | 35                                                                             | 35                                                                             | 9084     | 1982           | eukaryotic translation initiation factor 4gamma, 2                  | Translation regulator activity                  | Cytoplasm             | Translation regulatory protein      | Protein metabolism                                                                                 | MF4G,MA3               | Yes                      |
| IPO4        | 79711   | importin-4                                                                    | NP_078934.3       | 1          | 13                | 13         | 31     | 1.04                                                     | 1.06                                                     | 5.49                                                                                   | 9.31                                                                                   | 21.7                                                                                          | 38.1                                                                                          | 14                                                                             | 14                                                                             | 7022     | 79711          | importin 4                                                          | Transporter activity                            | Cytoplasm             | Transport/cargo protein             | Cell communication; Signal transduction                                                            | IBN_NT                 | Yes                      |
| ABCF2       | 10061   | ATP-binding cassette sub-family F member 2 isoform b                          | NP_005683.2       | 2          | 12                | 12         | 29     | 1.04                                                     | 1.04                                                     | 5.4                                                                                    | 6.11                                                                                   | 21.9                                                                                          | 25                                                                                            | 15                                                                             | 15                                                                             | 12403    | 10061          | ATP-binding cassette, sub-family F (GCN20), member 2                | Molecular function unknown                      | Mitochondrion         | Unclassified                        | Immune response                                                                                    | CC,AAA                 | Yes                      |
| STK4        | 6789    | serine/threonine-protein kinase 4                                             | NP_006273.1       | 1          | 4                 | 6          | 10     | 1.04                                                     | 1.03                                                     | 8.66                                                                                   | 2.7                                                                                    | 15.7                                                                                          | 4.8                                                                                           | 3                                                                              | 3                                                                              | 5395     | 6789           | serine/threonine kinase 4                                           | Protein serine/threonine kinase activity        | Cytoplasm             | Serine/threonine kinase             | Cell communication; Signal transduction                                                            | S_T_kinase;NES         | Yes                      |
| ATP6V0D1    | 9114    | V-type proton ATPase subunit d 1                                              | NP_004682.2       | 1          | 12                | 12         | 24     | 1.04                                                     | 1.03                                                     | 5.01                                                                                   | 6.26                                                                                   | 18.2                                                                                          | 22.7                                                                                          | 12                                                                             | 12                                                                             | 6121     | 9114           | ATPase, H+-transporting, lysosomal 38kDa, V0subunit d isoform 1     | ATPase activity                                 | -                     | ATPase                              | Transport                                                                                          | -                      | Yes                      |
| RPL4        | 6124    | 60S ribosomal protein L4                                                      | NP_000959.2       | 1          | 19                | 19         | 131    | 1.04                                                     | 1.03                                                     | 2.71                                                                                   | 4.46                                                                                   | 23.8                                                                                          | 39.5                                                                                          | 69                                                                             | 68                                                                             | 1607     | 6124           | ribosomal protein L4                                                | Structural constituent of ribosome              | Ribosome              | Ribosomal subunit                   | Protein metabolism                                                                                 | -                      | Yes                      |
| CLIC1       | 1192    | chloride intracellular channel protein 1                                      | NP_001279.2       | 2          | 17                | 18         | 132    | 1.04                                                     | 1.03                                                     | 3.05                                                                                   | 2.19                                                                                   | 26                                                                                            | 18.4                                                                                          | 65                                                                             | 65                                                                             | 4188     | 1192           | chloride intracellular channel 1                                    | Intracellular ligand-gated ion channel activity | Nucleus               | Intracellular ligand-gated channel  | Transport                                                                                          | -                      | Yes                      |
| FKBP15      | 23307   | FK506-binding protein 15                                                      | NP_056073.1       | 1          | 14                | 14         | 31     | 1.04                                                     | 1.03                                                     | 3.48                                                                                   | 5.37                                                                                   | 15.8                                                                                          | 24.4                                                                                          | 19                                                                             | 19                                                                             | 19414    | 23307          | FK506 binding protein 15, 133kDa                                    | Isomerase activity                              | Axon                  | Enzyme: Isomerase                   | Cell growth and/or maintenance                                                                     | WH1,CC                 | No                       |
| STX3        | 6809    | syntaxin-3 isoform 1                                                          | NP_004168.1       | 2          | 3                 | 3          | 5      | 1.04                                                     | 1.03                                                     | 8.92                                                                                   | 6.63                                                                                   | 16.1                                                                                          | 11.8                                                                                          | 3                                                                              | 3                                                                              | 15985    | 6809           | syntaxin 3A                                                         | Transporter activity                            | Plasma membrane       | Transport/cargo protein             | Transport                                                                                          | SynNt,SNARE,TM,CC      | No                       |
| FAM114A1    | 92689   | protein NOXP20                                                                | NP_612398.2       | 1          | 11                | 11         | 39     | 1.04                                                     | 1.02                                                     | 4.24                                                                                   | 9.91                                                                                   | 14.7                                                                                          | 34.4                                                                                          | 11                                                                             | 11                                                                             | 11282    | 92689          | None                                                                | Molecular function unknown                      | Cytoplasm             | Unclassified                        | Biological processes unknown                                                                       | CC                     | No                       |
| UBA3        | 9039    | NEDD8-activating enzyme E1 catalytic subunit isoform 1                        | NP_003959.3       | 2          | 12                | 12         | 33     | 1.04                                                     | 1.02                                                     | 6.02                                                                                   | 4.21                                                                                   | 26.3                                                                                          | 17.8                                                                                          | 17                                                                             | 17                                                                             | 4413     | 9039           | ubiquitin-activating enzyme E1C (UBA3 homolog, yeast)               | Ubiquitin-specific protease activity            | Nucleus               | Ubiquitin proteasome system protein | Protein metabolism                                                                                 | -                      | Yes                      |
| PPCDC       | 60490   | phosphopantothecoylserine decarboxylase isoform a                             | NP_068595.3       | 2          | 1                 | 1          | 1      | 1.04                                                     | 1.02                                                     |                                                                                        |                                                                                        |                                                                                               |                                                                                               | 1                                                                              | 1                                                                              | 14377    | 60490          | None                                                                | Catalytic activity                              | -                     | Enzyme: Decarboxylase               | Cofactor and prosthetic group metabolism                                                           | -                      | No                       |
| PLCD1       | 5333    | 1-phosphatidylinositol 4,5-bisphosphate 3-phosphodiesterase delta-1 isoform 1 | NP_001124436.1    | 2          | 1                 | 1          | 4      | 1.04                                                     | 1.02                                                     | 26.69                                                                                  | 1.17                                                                                   | 40.9                                                                                          | 1.7                                                                                           | 2                                                                              | 2                                                                              | 9073     | 5333           | phospholipase C, delta 1                                            | Phospholipase activity                          | Plasma membrane       | Enzyme: Phospholipase               | Metabolism;Energy pathways                                                                         | PH,EF,C,PLCX,c,PLCYc   | Yes                      |
| TRAPPC6B    | 122553  | trafficking protein particle complex subunit 6B isoform 1                     | NP_001073005.1    | 2          | 2                 | 2          | 7      | 1.04                                                     | 1.01                                                     | 10.4                                                                                   | 15.91                                                                                  | 22                                                                                            | 32.9                                                                                          | 4                                                                              | 4                                                                              | 18221    | 122553         | trafficking protein particle complex 6B                             | Molecular function unknown                      | -                     | Unclassified                        | Biological processes unknown                                                                       | SP                     | No                       |
| ATP6V1B2    | 526     | V-type proton ATPase subunit B, brain isoform                                 | NP_001684.2       | 2          | 18                | 18         | 64     | 1.04                                                     | 1                                                        | 3.29                                                                                   | 4.78                                                                                   | 20.8                                                                                          | 29.3                                                                                          | 36                                                                             | 36                                                                             | 6088     | 526            | ATPase, H+-transporting, lysosomal 5658kDa, V1 subunit B, isoform 2 | Transporter activity                            | Endosome              | Transport/cargo protein             | Transport                                                                                          | -                      | Yes                      |
| DDX47       | 51202   | probable ATP-dependent RNA helicase DDX47 isoform 1                           | NP_057439.2       | 2          | 9                 | 9          | 22     | 1.04                                                     | 1                                                        | 9.25                                                                                   | 13.69                                                                                  | 32.7                                                                                          | 48.1                                                                                          | 11                                                                             | 11                                                                             | 10863    | 51202          | DEAD (Asp-Glu-Ala-Asp) box polypeptide 47                           | Molecular function unknown                      | Nucleus               | Unclassified;RNA helicase           | Regulation of nucleobase, nucleoside and nucleic acid metabolism; Ribosome biogenesis and assembly | DEXDc;HELIC;D EAD      | Yes                      |
| AP2A2       | 161     | AP-2 complex subunit alpha-2 isoform 2                                        | NP_036437.1       | 2          | 15                | 23         | 73     | 1.04                                                     | 1                                                        | 4.25                                                                                   | 6.02                                                                                   | 21                                                                                            | 28.9                                                                                          | 22                                                                             | 22                                                                             | 6256     | 161            | adaptor-related protein complex 2, alpha 2 subunit                  | Transporter activity                            | Plasma membrane       | Transport/cargo protein             | Transport                                                                                          | ADAP,CC                | Yes                      |

Supplementary Table S1. List of quantified proteins in OKF6/TERT1-Smoke cells  
 Raingopaln *et al.*, 2017. Role of protein kinase N2 (PKN2) in cigarette smoke-mediated oncogenic transformation of oral cells

| Gene Symbol | Gene ID | Protein Description                                                   | Protein Accession | # Proteins | # Unique Peptides | # Peptides | # PSMs | OKF6/TERT1-Smoke/OKF6/TERT1-Parental (130/126) R1 | OKF6/TERT1-Smoke/OKF6/TERT1-Parental (128/127) R2 | Ratio Standard Errors [%]: OKF6/TERT1-Smoke/OKF6/TERT1-Parental (130/126) R1 | Ratio Standard Errors [%]: OKF6/TERT1-Smoke/OKF6/TERT1-Parental (128/127) R2 | Ratio Variabilities [%]: F13: OKF6/TERT1-Smoke/OKF6/TERT1-Parental (130/126) R1 | Ratio Variabilities [%]: F13: OKF6/TERT1-Smoke/OKF6/TERT1-Parental (128/127) R2 | Ratio Counts: F13: OKF6/TERT1-Smoke/OKF6/TERT1-Parental (130/126) R1 | Ratio Counts: F13: OKF6/TERT1-Smoke/OKF6/TERT1-Parental (128/127) R2 | HPRD ID | Entrez Gene Id | Gene Name                                                  | Molecular Function                           | Primary Localization  | Molecular Class            | Biological Process                                                           | Domains             | Plasma Proteome Database |
|-------------|---------|-----------------------------------------------------------------------|-------------------|------------|-------------------|------------|--------|---------------------------------------------------|---------------------------------------------------|------------------------------------------------------------------------------|------------------------------------------------------------------------------|---------------------------------------------------------------------------------|---------------------------------------------------------------------------------|----------------------------------------------------------------------|----------------------------------------------------------------------|---------|----------------|------------------------------------------------------------|----------------------------------------------|-----------------------|----------------------------|------------------------------------------------------------------------------|---------------------|--------------------------|
| PPP6R2      | 9701    | serine/threonine-protein phosphatase 6 regulatory subunit 2 isoform 1 | NP_001229827.1    | 4          | 5                 | 5          | 8      | 1.04                                              | 0.99                                              | 1.47                                                                         | 8.21                                                                         | 3.4                                                                             | 18.4                                                                            | 5                                                                    | 5                                                                    |         |                |                                                            |                                              |                       |                            |                                                                              |                     |                          |
| HS2ST1      | 9653    | heparan sulfate 2-O-sulfotransferase 1 isoform 1                      | NP_036394.1       | 2          | 1                 | 1          | 1      | 1.04                                              | 0.99                                              |                                                                              |                                                                              |                                                                                 |                                                                                 | 1                                                                    | 1                                                                    | 9215    | 9653           | heparan sulfate 2-O-sulfotransferase 1                     | Sulfotransferase activity                    | -                     | Enzyme: Sulfotransferase   | Metabolism;Energy pathways                                                   | CC;SP               | No                       |
| TMX3        | 54495   | protein disulfide-isomerase TMX3 precursor                            | NP_061895.3       | 1          | 5                 | 5          | 11     | 1.04                                              | 0.99                                              | 5.79                                                                         | 17.68                                                                        | 12.1                                                                            | 36.2                                                                            | 4                                                                    | 4                                                                    | 15591   | 54495          | thioredoxin domain containing 10                           | Oxidoreductase activity                      | Integral to membrane  | Enzyme: Oxidoreductase     | Metabolism;Energy pathways                                                   | TM                  | No                       |
| RAB21       | 23011   | ras-related protein Rab-21                                            | NP_055814.1       | 1          | 8                 | 8          | 23     | 1.04                                              | 0.98                                              | 5.13                                                                         | 6.79                                                                         | 19.4                                                                            | 24.4                                                                            | 13                                                                   | 13                                                                   | 6695    | 23011          | RAB21, member RAS oncogene family                          | GTPase activity                              | Endoplasmic reticulum | GTPase                     | Cell communication;Signal transduction                                       | RAB                 | Yes                      |
| TRABD       | 80305   | traB domain-containing protein                                        | NP_079480.2       | 1          | 3                 | 3          | 5      | 1.04                                              | 0.97                                              | 8.14                                                                         | 1.29                                                                         | 14.7                                                                            | 2.2                                                                             | 3                                                                    | 3                                                                    | 11450   | 80305          | None                                                       | Molecular function unknown                   | -                     | Unclassified               | Biological process unknown                                                   | -                   | Yes                      |
| YIPF4       | 84272   | protein YIPF4                                                         | NP_115688.1       | 1          | 1                 | 1          | 1      | 1.04                                              | 0.96                                              |                                                                              |                                                                              |                                                                                 |                                                                                 | 1                                                                    | 1                                                                    | 14410   | 84272          | None                                                       | Molecular function unknown                   | -                     | Unclassified               | Biological process unknown                                                   | TM                  | No                       |
| ASMTL       | 8623    | N-acetylsertoinin O-methyltransferase like protein isoform 1          | NP_004183.2       | 3          | 1                 | 1          | 2      | 1.04                                              | 0.96                                              |                                                                              |                                                                              |                                                                                 |                                                                                 | 1                                                                    | 1                                                                    | 2156    | 8623           | acetylsertoinin O-methyltransferase like                   | Acylntransferase activity                    | Cytoplasm             | Enzyme: Acyltransferase    | Metabolism;Energy pathways                                                   | -                   | Yes                      |
| CPD         | 1362    | carboxypeptidase D isoform 1 precursor                                | NP_001295.2       | 2          | 15                | 15         | 29     | 1.04                                              | 0.95                                              | 6.07                                                                         | 10                                                                           | 26.4                                                                            | 40.5                                                                            | 17                                                                   | 17                                                                   | 4375    | 1362           | carboxypeptidase D                                         | Carboxypeptidase activity                    | Plasma membrane       | Carboxypeptidase           | Protein metabolism                                                           | SP_Za_pept;TM       | Yes                      |
| MRPL13      | 28998   | 39S ribosomal protein L13, mitochondrial                              | NP_054797.2       | 1          | 6                 | 6          | 13     | 1.04                                              | 0.95                                              | 3.01                                                                         | 3.01                                                                         | 8.9                                                                             | 8.1                                                                             | 8                                                                    | 8                                                                    | 14740   | 28998          | mitochondrial ribosomal protein L13                        | Structural constituent of ribosome           | Mitochondrion         | Ribosomal subunit          | Protein metabolism                                                           | -                   | No                       |
| LANCL1      | 10314   | lanC-like protein 1                                                   | NP_06046.1        | 1          | 6                 | 6          | 13     | 1.04                                              | 0.95                                              | 5.89                                                                         | 5.17                                                                         | 16.3                                                                            | 13.1                                                                            | 7                                                                    | 7                                                                    | 16040   | 10314          | LanC lantibiotic synthetase component C-like 1 (bacterial) | G-protein coupled receptor activity          | Plasma membrane       | G protein coupled receptor | Immune response                                                              | TM                  | Yes                      |
| KIF5B       | 3799    | kinesin-1 heavy chain                                                 | NP_004512.1       | 3          | 40                | 40         | 107    | 1.04                                              | 0.94                                              | 2.46                                                                         | 2.65                                                                         | 19.8                                                                            | 19.3                                                                            | 59                                                                   | 59                                                                   | 7214    | 3799           | kinesin family member 5B                                   | Motor activity                               | Mitochondrion         | Motor protein              | Cell growth and/or maintenance                                               | KISC;CC             | Yes                      |
| MRPL47      | 57129   | 39S ribosomal protein L47, mitochondrial isoform A                    | NP_065142.2       | 2          | 5                 | 5          | 8      | 1.04                                              | 0.93                                              | 10.14                                                                        | 4.25                                                                         | 21.2                                                                            | 7.9                                                                             | 4                                                                    | 4                                                                    | 14766   | 57129          | mitochondrial ribosomal protein L47                        | Structural constituent of ribosome           | Mitochondrion         | Ribosomal subunit          | Protein metabolism                                                           | SP;CC               | Yes                      |
| VDR         | 7421    | vitamin D3 receptor isoform VDRB1                                     | NP_001017536.1    | 2          | 1                 | 1          | 2      | 1.04                                              | 0.92                                              |                                                                              |                                                                              |                                                                                 |                                                                                 | 1                                                                    | 1                                                                    | 3463    | 7421           | vitamin D (1,25-dihydroxyvitamin D3) receptor              | Transcription factor activity                | Nucleus               | Transcription factor       | Regulation of gene expression, epigenetic                                    | ZnF_C4;HOLLN;LS;NES | Yes                      |
| ELP4        | 26610   | elongator complex protein 4 isoform 3                                 | NP_001275655.1    | 3          | 2                 | 2          | 4      | 1.04                                              | 0.91                                              | 4.88                                                                         | 43.8                                                                         | 7.2                                                                             | 61                                                                              | 2                                                                    | 2                                                                    | 7377    | 26610          | elongation protein 4 homolog (S. cerevisiae)               | Acylntransferase activity                    | Nucleus               | Enzyme: Acyltransferase    | Regulation of nucleobase, nucleoside, nucleotide and nucleic acid metabolism | -                   | No                       |
| PLEKHA5     | 54477   | pleckstrin homology domain-containing family A member 5 isoform 4     | NP_001243399.1    | 5          | 10                | 10         | 22     | 1.04                                              | 0.89                                              | 4.82                                                                         | 4.27                                                                         | 15.9                                                                            | 12                                                                              | 10                                                                   | 10                                                                   | 9684    | 54477          | pleckstrin homology domain containing family A member 5    | Receptor signaling complex scaffold activity | Nucleus;Cytoplasm     | Adapter molecule           | Cell communication;Signal transduction                                       | WW;PH;CC            | Yes                      |
| AIFM1       | 9131    | apoptosis-inducing factor 1, mitochondrial isoform 1 precursor        | NP_004199.1       | 5          | 15                | 15         | 41     | 1.04                                              | 0.89                                              | 6.77                                                                         | 9.58                                                                         | 34.6                                                                            | 42.6                                                                            | 23                                                                   | 23                                                                   | 2161    | 9131           | programmed cell death 8 (apoptosis-inducing factor)        | Oxidoreductase activity                      | Mitochondrion         | Enzyme: Oxidoreductase     | Cell communication;Signal transduction                                       | TM                  | Yes                      |
| WFS1        | 7466    | wolframin                                                             | NP_005996.2       | 1          | 2                 | 2          | 4      | 1.04                                              | 0.89                                              | 5.8                                                                          | 5.04                                                                         | 8.6                                                                             | 6.4                                                                             | 2                                                                    | 2                                                                    | 5864    | 7466           | Wolfram syndrome 1 (wolframin)                             | Molecular function unknown                   | Endoplasmic reticulum | Integral membrane protein  | Cell communication;Signal transduction                                       | TM                  | Yes                      |
| RBM33       | 155435  | RNA-binding protein 33                                                | NP_444271.2       | 1          | 2                 | 2          | 3      | 1.04                                              | 0.87                                              | 15.34                                                                        | 7.62                                                                         | 22.8                                                                            | 9.3                                                                             | 2                                                                    | 2                                                                    | 17310   | 155435         | RNA binding motif protein 33                               | RNA binding                                  | Nucleus               | RNA binding protein        | Regulation of nucleobase, nucleoside, nucleotide and nucleic acid metabolism | RRM;CC              | No                       |
| CCAR1       | 55749   | cell division cycle and apoptosis regulator protein 1 isoform a       | NP_060707.2       | 2          | 10                | 10         | 22     | 1.04                                              | 0.86                                              | 5.39                                                                         | 11.03                                                                        | 19.6                                                                            | 33.8                                                                            | 12                                                                   | 12                                                                   | 10811   | 55749          | cell division cycle and apoptosis regulator 1              | Molecular function unknown                   | Cytoplasm             | Cell cycle control protein | Cell communication;Signal transduction;Regulation of cell cycle              | SAP;CC              | Yes                      |
| ISG15       | 9636    | ubiquitin-like protein ISG15 precursor                                | NP_005092.1       | 1          | 4                 | 4          | 8      | 1.04                                              | 0.85                                              | 25.47                                                                        | 28.97                                                                        | 57.1                                                                            | 52.5                                                                            | 4                                                                    | 4                                                                    | 958     | 9636           | interferon, alpha-inducible protein (cloneIF-15K)          | Cytokine activity                            | Extracellular         | Cytokine                   | Immune response                                                              | UBQ;SP              | Yes                      |
| COA3        | 28958   | cytochrome c oxidase assembly factor 3 homolog, mitochondrial         | NP_001035521.1    | 1          | 3                 | 3          | 10     | 1.04                                              | 0.85                                              | 6.04                                                                         | 9.62                                                                         | 14                                                                              | 18.5                                                                            | 5                                                                    | 5                                                                    |         |                |                                                            |                                              |                       |                            |                                                                              |                     |                          |
| DNAJB12     | 54788   | dnaJ homolog subfamily B member 12                                    | NP_001002762.2    | 1          | 2                 | 2          | 4      | 1.04                                              | 0.84                                              | 5.43                                                                         | 2.5                                                                          | 8                                                                               | 3                                                                               | 2                                                                    | 2                                                                    | 7086    | 54788          | DnaJ (Hsp40) homolog subfamily B, member 12                | Molecular function unknown                   | -                     | Integral membrane protein  | Biological process unknown                                                   | DNAJ;TM             | Yes                      |
| STK38       | 11329   | serine/threonine-protein kinase 38                                    | NP_009202.1       | 1          | 3                 | 3          | 7      | 1.04                                              | 0.84                                              | 0.88                                                                         | 8.03                                                                         | 1.8                                                                             | 13.5                                                                            | 4                                                                    | 4                                                                    | 9511    | 11329          | serine/threonine kinase 38                                 | Protein serine/threonine kinase activity     | Nucleus               | Serine/threonine kinase    | Cell communication;Signal transduction                                       | S_T_kinase;NLS      | No                       |
| NAA30       | 122830  | N-alpha-acetyltransferase 30                                          | NP_001011713.2    | 1          | 1                 | 1          | 2      | 1.04                                              | 0.82                                              |                                                                              |                                                                              |                                                                                 |                                                                                 | 1                                                                    | 1                                                                    | 16619   | 122830         | chromosome 14 open reading frame 35                        | Transferase activity                         | -                     | Enzyme: Transferase        | Metabolism;Energy pathways                                                   | -                   | No                       |
| MYH11       | 4629    | myosin-11 isoform SM1B                                                | NP_001035203.1    | 13         | 6                 | 27         | 691    | 1.04                                              | 0.77                                              | 2.14                                                                         | 2.8                                                                          | 32.7                                                                            | 31.4                                                                            | 204                                                                  | 204                                                                  | 1174    | 4629           | myosin, heavy polypeptide 11, smooth muscle                | Structural molecule activity                 | Cytoplasm             | Structural protein         | Cell growth and/or maintenance                                               | MYOSIN;JQ;CC        | Yes                      |
| LONP2       | 83752   | lon protease homolog 2, peroxisomal isoform 1                         | NP_113678.2       | 2          | 1                 | 1          | 2      | 1.04                                              | 0.75                                              |                                                                              |                                                                              |                                                                                 |                                                                                 | 1                                                                    | 1                                                                    | 7491    | 83752          | None                                                       | Aminopeptidase activity                      | -                     | Aminopeptidase             | Protein metabolism                                                           | AAA                 | No                       |
| PDCD5       | 9141    | programmed cell death protein 5                                       | NP_004699.1       | 1          | 4                 | 4          | 10     | 1.04                                              | 0.74                                              | 2.53                                                                         | 5.12                                                                         | 5.9                                                                             | 8.4                                                                             | 5                                                                    | 5                                                                    | 6843    | 9141           | programmed cell death 5                                    | Molecular function unknown                   | Cytoplasm             | Unclassified               | Apoptosis                                                                    | -                   | Yes                      |
| CCDC12      | 151903  | coiled-coil domain-containing protein 12 1                            | NP_653317.2       | 2          | 2                 | 2          | 3      | 1.04                                              | 0.74                                              | 0.91                                                                         | 9.52                                                                         | 1.3                                                                             | 10                                                                              | 2                                                                    | 2                                                                    | 13007   | 151903         | coiled-coil domain containing 12                           | Molecular function unknown                   | -                     | Unclassified               | Biological process unknown                                                   | CC                  | No                       |
| TIPRL       | 261726  | TIP41-like protein isoform 1                                          | NP_690866.1       | 2          | 10                | 10         | 19     | 1.04                                              | 0.72                                              | 14                                                                           | 8.05                                                                         | 56.1                                                                            | 21.1                                                                            | 13                                                                   | 13                                                                   | 14608   | 261726         | TIP41, TOR signaling pathway regulator-like(S. cerevisiae) | Molecular function unknown                   | -                     | Unclassified               | Biological process unknown                                                   | -                   | No                       |

Supplementary Table S1. List of quantified proteins in OKF6/TERT1-Smoke cells  
 Raigopalani *et al.*, 2017. Role of protein kinase N2 (PKN2) in cigarette smoke-mediated oncogenic transformation of oral cells

| Gene Symbol | Gene ID | Protein Description                                                                      | Protein Accession | # Proteins | # Unique Peptides | # Peptides | # PSMs | OKF6/TERT1-Smoke/<br>OKF6/TERT1-Parental<br>(130/126) R1 | OKF6/TERT1-Smoke/<br>OKF6/TERT1-Parental<br>(128/127) R2 | Ratio Standard Errors [%]:<br>OKF6/TERT1-Smoke/<br>OKF6/TERT1-Parental<br>(130/126) R1 | Ratio Standard Errors [%]:<br>OKF6/TERT1-Smoke/<br>OKF6/TERT1-Parental<br>(128/127) R2 | Ratio Variabilities [%]:<br>F13: OKF6/TERT1-<br>Smoke/<br>OKF6/TERT1-Parental<br>(130/126) R1 | Ratio Variabilities [%]:<br>F13: OKF6/TERT1-<br>Smoke/<br>OKF6/TERT1-Parental<br>(128/127) R2 | Ratio Counts: F13:<br>OKF6/TERT1-Smoke/<br>OKF6/TERT1-Parental<br>(130/126) R1 | Ratio Counts: F13:<br>OKF6/TERT1-Smoke/<br>OKF6/TERT1-Parental<br>(128/127) R2 | HFPR ID | Entrez Gene ID | Gene Name                                                                       | Molecular Function                           | Primary Localization  | Molecular Class                             | Biological Process                                                           | Domains                              | Plasma Proteome Database |
|-------------|---------|------------------------------------------------------------------------------------------|-------------------|------------|-------------------|------------|--------|----------------------------------------------------------|----------------------------------------------------------|----------------------------------------------------------------------------------------|----------------------------------------------------------------------------------------|-----------------------------------------------------------------------------------------------|-----------------------------------------------------------------------------------------------|--------------------------------------------------------------------------------|--------------------------------------------------------------------------------|---------|----------------|---------------------------------------------------------------------------------|----------------------------------------------|-----------------------|---------------------------------------------|------------------------------------------------------------------------------|--------------------------------------|--------------------------|
| DDX49       | 54555   | probable ATP-dependent RNA helicase DDX49                                                | NP_061943.2       | 1          | 1                 | 1          | 2      | 1.03                                                     | 1.8                                                      |                                                                                        |                                                                                        |                                                                                               |                                                                                               | 1                                                                              | 1                                                                              | 10864   | 54555          | DEAD (Asp-Glu-Ala-Asp) box polypeptide 49                                       | Helicase activity                            | Nucleus               | RNA helicase                                | Regulation of nucleobase, nucleoside, nucleotide and nucleic acid metabolism | DEXDc:HELIC:C                        | No                       |
| DHX8        | 1659    | ATP-dependent RNA helicase DHX8 isoform 1                                                | NP_004932.1       | 2          | 2                 | 2          | 5      | 1.03                                                     | 1.79                                                     | 0.58                                                                                   | 26.1                                                                                   | 1                                                                                             | 96.1                                                                                          | 3                                                                              | 3                                                                              | 2672    | 1659           | DEAH (Asp-Glu-Ala-His) box polypeptide 8                                        | RNA binding                                  | Nucleus               | RNA binding protein                         | Regulation of nucleobase, nucleoside, nucleotide and nucleic acid metabolism | DEXDc:HELIC:S1,CC                    | Yes                      |
| HNRNPA2B1   | 3181    | heterogeneous nuclear ribonucleoproteins A2/B1 isoform B1                                | NP_112533.1       | 2          | 19                | 22         | 96     | 1.03                                                     | 1.74                                                     | 3.26                                                                                   | 5.11                                                                                   | 21.4                                                                                          | 61.2                                                                                          | 40                                                                             | 40                                                                             | 2526    | 3181           | heterogeneous nuclear ribonucleoprotein A2/B1                                   | Transcription factor binding;RNA binding     | Nucleus               | Ribonucleoprotein;RNA binding protein       | Regulation of nucleobase, nucleoside, nucleotide and nucleic acid metabolism | RRM                                  | Yes                      |
| KLC2        | 64837   | kinesin light chain 2 isoform 1                                                          | NP_073733.1       | 3          | 8                 | 13         | 21     | 1.03                                                     | 1.61                                                     | 3.77                                                                                   | 3.33                                                                                   | 10.3                                                                                          | 14.3                                                                                          | 7                                                                              | 7                                                                              | 13917   | 64837          | None                                                                            | Motor activity                               | Cytoplasm             | Motor protein                               | Cell growth and/or maintenance                                               | CC;TPR                               | Yes                      |
| FBXO4       | 26272   | F-box only protein 4 isoform 1                                                           | NP_036308.1       | 3          | 2                 | 2          | 3      | 1.03                                                     | 1.58                                                     |                                                                                        |                                                                                        |                                                                                               |                                                                                               | 1                                                                              | 1                                                                              | 9949    | 26272          | F-box protein 4                                                                 | Ubiquitin-specific protease activity         | Nucleus               | Ubiquitin proteasome system protein         | Protein metabolism                                                           | F_BOX                                | Yes                      |
| RPUSD2      | 27079   | RNA pseudouridylylate synthase domain-containing protein 2 isoform 1                     | NP_689473.1       | 1          | 1                 | 1          | 2      | 1.03                                                     | 1.48                                                     |                                                                                        |                                                                                        |                                                                                               |                                                                                               | 1                                                                              | 1                                                                              | 12668   | 27079          | RNA pseudouridylylate synthase domain containing 2                              | Molecular function unknown                   | -                     | Unclassified                                | Biological process unknown                                                   | -                                    | Yes                      |
| COX4I1      | 1327    | cytochrome c oxidase subunit 4 isoform 1, mitochondrial precursor                        | NP_001852.1       | 1          | 6                 | 6          | 21     | 1.03                                                     | 1.46                                                     | 7.53                                                                                   | 5.88                                                                                   | 24.9                                                                                          | 27.7                                                                                          | 10                                                                             | 10                                                                             | 466     | 1327           | cytochrome c oxidase subunit IV isoform 1                                       | Oxidoreductase activity                      | Mitochondrion         | Enzyme;Oxidoreductase                       | Metabolism;Energy pathways                                                   | TMS,SP                               | Yes                      |
| MPT         | 4357    | 3-mercaptopyruvate sulfurtransferase isoform 1                                           | NP_066949.2       | 2          | 7                 | 7          | 27     | 1.03                                                     | 1.42                                                     | 5.15                                                                                   | 7.08                                                                                   | 19.3                                                                                          | 37.4                                                                                          | 13                                                                             | 13                                                                             | 11896   | 4357           | mercaptopyruvate sulfurtransferase                                              | Sulfotransferase activity                    | Mitochondrion         | Enzyme;Sulfotransferase                     | Metabolism;Energy pathways                                                   | RHOD                                 | Yes                      |
| ARMC6       | 93436   | armadillo repeat-containing protein 6 isoform 1                                          | NP_001186125.1    | 2          | 3                 | 3          | 6      | 1.03                                                     | 1.39                                                     | 2.37                                                                                   | 0.22                                                                                   | 4.2                                                                                           | 0.5                                                                                           | 3                                                                              | 3                                                                              | 12488   | 93436          | armadillo repeat containing 6                                                   | Molecular function unknown                   | -                     | Unclassified                                | Signal transduction                                                          | ARM                                  | No                       |
| KIAA0391    | 9692    | mitochondrial ribonuclease P protein 3 isoform 1 precursor                               | NP_055487.2       | 4          | 3                 | 3          | 6      | 1.03                                                     | 1.35                                                     | 7.21                                                                                   | 2.52                                                                                   | 10.5                                                                                          | 4.8                                                                                           | 2                                                                              | 2                                                                              | 18711   | 9692           | KIAA0391                                                                        | Molecular function unknown                   | Mitochondrion         | Unclassified                                | Biological process unknown                                                   | -                                    | Yes                      |
| UTP3        | 57050   | something about silencing protein 10                                                     | NP_065101.1       | 1          | 4                 | 4          | 4      | 1.03                                                     | 1.31                                                     | 4.54                                                                                   | 0.92                                                                                   | 8.1                                                                                           | 2.1                                                                                           | 3                                                                              | 3                                                                              | 18016   | 57050          | None                                                                            | Molecular function unknown                   | Nucleolus             | Unclassified                                | Biological process unknown                                                   | CC                                   | Yes                      |
| RANBP9      | 10048   | ran-binding protein 9                                                                    | NP_005484.2       | 1          | 2                 | 2          | 3      | 1.03                                                     | 1.29                                                     | 5.83                                                                                   | 11.48                                                                                  | 8.5                                                                                           | 21.2                                                                                          | 2                                                                              | 2                                                                              | 4835    | 10048          | RAN binding protein 9                                                           | Cytoskeletal protein binding                 | Nucleus               | Cytoskeletal associated protein             | Cell growth and/or maintenance                                               | SPRYLISH;CTLH                        | No                       |
| MAPK3       | 5595    | mitogen-activated protein kinase 3 isoform 1                                             | NP_002737.2       | 4          | 5                 | 8          | 20     | 1.03                                                     | 1.28                                                     | 7.65                                                                                   | 15.67                                                                                  | 11.2                                                                                          | 29                                                                                            | 2                                                                              | 2                                                                              | 3479    | 5595           | mitogen-activated protein kinase 3                                              | Protein serine/threonine kinase activity     | Cytoplasm             | Serine/threonine kinase                     | Signal transduction                                                          | S_T_kinase                           | Yes                      |
| PURA        | 5813    | transcriptional activator protein Pur-alpha                                              | NP_005850.1       | 1          | 7                 | 7          | 29     | 1.03                                                     | 1.27                                                     | 7.12                                                                                   | 11.29                                                                                  | 29.1                                                                                          | 60.3                                                                                          | 15                                                                             | 15                                                                             | 2721    | 5813           | purine-rich element binding protein A                                           | Transcription factor activity                | Nucleus               | Transcription factor                        | Regulation of nucleobase, nucleoside, nucleotide and nucleic acid metabolism | -                                    | Yes                      |
| PPP2R4      | 5524    | serine/threonine-protein phosphatase 2A activator isoform a                              | NP_821068.1       | 5          | 10                | 10         | 26     | 1.03                                                     | 1.27                                                     | 5.99                                                                                   | 5.65                                                                                   | 23.5                                                                                          | 27.3                                                                                          | 14                                                                             | 14                                                                             | 2858    | 5524           | protein phosphatase 2A, regulatory subunit B (PR 53)                            | Phosphatase regulator activity               | Cytoplasm             | Enzyme regulator;Cell cycle control protein | Cell communication;Signal transduction;Regulation of cell cycle              | -                                    | Yes                      |
| DNAAF5      | 54919   | dynein assembly factor 5, axonemal                                                       | NP_060272.3       | 1          | 13                | 13         | 25     | 1.03                                                     | 1.27                                                     | 3.92                                                                                   | 8.87                                                                                   | 15.2                                                                                          | 44.3                                                                                          | 14                                                                             | 14                                                                             |         |                |                                                                                 |                                              |                       |                                             |                                                                              |                                      |                          |
| CTH         | 1491    | cystathionine gamma-lyase isoform 1                                                      | NP_001893.2       | 3          | 2                 | 2          | 3      | 1.03                                                     | 1.26                                                     |                                                                                        |                                                                                        |                                                                                               |                                                                                               | 1                                                                              | 1                                                                              | 9633    | 1491           | cystathionase (cystathionine gamma-lyase)                                       | Cysteine-type peptidase activity             | Cytoplasm             | Cysteine protease                           | Protein metabolism                                                           | -                                    | Yes                      |
| MRPL50      | 54534   | 39S ribosomal protein L50, mitochondrial                                                 | NP_061924.1       | 1          | 2                 | 2          | 3      | 1.03                                                     | 1.23                                                     | 23.88                                                                                  | 5.61                                                                                   | 35.9                                                                                          | 9.8                                                                                           | 2                                                                              | 2                                                                              | 14768   | 54534          | mitochondrial ribosomal protein L50                                             | Structural constituent of ribosome           | Mitochondrion         | Ribosomal subunit                           | Protein metabolism                                                           | -                                    | No                       |
| WARS        | 7453    | tryptophan-tRNA ligase, cytoplasmic isoform a                                            | NP_004175.2       | 2          | 20                | 20         | 65     | 1.03                                                     | 1.21                                                     | 5.07                                                                                   | 8.12                                                                                   | 30.4                                                                                          | 60.3                                                                                          | 32                                                                             | 32                                                                             | 1845    | 7453           | tryptophanyl-tRNA synthetase                                                    | Ligase activity                              | Cytoplasm             | Enzyme;Ligase                               | Protein metabolism                                                           | -                                    | Yes                      |
| TCERG1      | 10915   | transcription elongation regulator 1 isoform 1                                           | NP_006697.2       | 2          | 10                | 10         | 22     | 1.03                                                     | 1.21                                                     | 5.64                                                                                   | 3.17                                                                                   | 20.3                                                                                          | 13.4                                                                                          | 12                                                                             | 12                                                                             | 10393   | 10915          | transcription elongation regulator 1                                            | Transcription factor activity                | Nucleus               | Transcription factor                        | Regulation of nucleobase, nucleoside, nucleotide and nucleic acid metabolism | WW;CC;FF                             | Yes                      |
| TAF7        | 6879    | transcription initiation factor TFIID subunit 7                                          | NP_005633.2       | 1          | 3                 | 3          | 5      | 1.03                                                     | 1.2                                                      | 0.7                                                                                    | 4.63                                                                                   | 1.3                                                                                           | 9.7                                                                                           | 3                                                                              | 3                                                                              | 7196    | 6879           | TAF7 RNA polymerase II, TATA box binding protein (TBP)-associated factor, 55kDa | Transcription factor activity                | Nucleus               | Transcription factor                        | Regulation of nucleobase, nucleoside, nucleotide and nucleic acid metabolism | CC                                   | No                       |
| LYPLAL1     | 127018  | lysophospholipase-like protein 1 isoform a                                               | NP_620149.2       | 4          | 3                 | 3          | 6      | 1.03                                                     | 1.18                                                     | 1.25                                                                                   | 2.38                                                                                   | 2.2                                                                                           | 4.9                                                                                           | 3                                                                              | 3                                                                              | 14335   | 127018         | lysophospholipase-like 1                                                        | Molecular function unknown                   | -                     | Unclassified                                | Biological process unknown                                                   | -                                    | No                       |
| HSPG2       | 3339    | basement membrane-specific heparan sulfate proteoglycan core protein isoform a precursor | NP_001278789.1    | 2          | 15                | 15         | 40     | 1.03                                                     | 1.18                                                     | 5.69                                                                                   | 5.77                                                                                   | 26.7                                                                                          | 31.3                                                                                          | 20                                                                             | 20                                                                             | 804     | 3339           | heparan sulfate proteoglycan 2 (perlecan)                                       | Extracellular matrix structural constituent  | Extracellular         | Extracellular matrix protein                | Cell growth and/or maintenance                                               | SP;SEA;LDL;AGC2;LAMB;EGFLA;MLAM;EGFG | Yes                      |
| USP8        | 9101    | ubiquitin carboxyl-terminal hydrolase 8 isoform a                                        | NP_005145.3       | 2          | 2                 | 2          | 3      | 1.03                                                     | 1.17                                                     | 5.82                                                                                   | 8.62                                                                                   | 8.5                                                                                           | 14.4                                                                                          | 2                                                                              | 2                                                                              | 4405    | 9101           | ubiquitin specific protease 8                                                   | Ubiquitin-specific protease activity         | Nucleus               | Ubiquitin proteasome system protein         | Protein metabolism                                                           | CC;RHOD;UCH                          | Yes                      |
| PLAA        | 9373    | phospholipase A2-activating protein                                                      | NP_001026859.1    | 1          | 26                | 26         | 51     | 1.03                                                     | 1.16                                                     | 3.14                                                                                   | 2.13                                                                                   | 17                                                                                            | 12.8                                                                                          | 27                                                                             | 27                                                                             | 4850    | 9373           | phospholipase A2, activating protein                                            | Receptor signaling complex scaffold activity | Cytoplasm             | Adapter molecule                            | Cell communication;Signal transduction                                       | WD40                                 | Yes                      |
| RC3H2       | 54542   | roquin-2 isoform 1                                                                       | NP_001094058.1    | 6          | 1                 | 1          | 4      | 1.03                                                     | 1.15                                                     | 9.88                                                                                   | 9.77                                                                                   | 14.5                                                                                          | 16.1                                                                                          | 2                                                                              | 2                                                                              | 14726   | 54542          | membrane associated DNA binding protein                                         | DNA binding                                  | Endoplasmic reticulum | DNA binding protein                         | Regulation of nucleobase, nucleoside, nucleotide and nucleic acid metabolism | Znf_C3H1;RING                        | No                       |

Supplementary Table S1. List of quantified proteins in OKF6/TERT1-Smoke cells  
 Raingopaln *et al.*, 2017. Role of protein kinase N2 (PKN2) in cigarette smoke-mediated oncogenic transformation of oral cells

| Gene Symbol | Gene ID | Protein Description                                                   | Protein Accession | # Proteins | # Unique Peptides | # Peptides | # PSMs | OKF6/TERT1-Smoke/<br>OKF6/TERT1-Parental<br>(130/126) R1 | OKF6/TERT1-Smoke/<br>OKF6/TERT1-Parental<br>(128/127) R2 | Ratio Standard Errors [%]:<br>OKF6/TERT1-Smoke/<br>OKF6/TERT1-Parental<br>(130/126) R1 | Ratio Standard Errors [%]:<br>OKF6/TERT1-Smoke/<br>OKF6/TERT1-Parental<br>(128/127) R2 | Ratio Variabilities [%]:<br>F13: OKF6/TERT1-<br>Smoke/<br>OKF6/TERT1-Parental<br>(130/126) R1 | Ratio Variabilities [%]:<br>F13: OKF6/TERT1-<br>Smoke/<br>OKF6/TERT1-Parental<br>(128/127) R2 | Ratio Counts: F13:<br>OKF6/TERT1-Smoke/<br>OKF6/TERT1-Parental<br>(130/126) R1 | Ratio Counts: F13:<br>OKF6/TERT1-Smoke/<br>OKF6/TERT1-Parental<br>(128/127) R2 | HFPR ID | Entrez Gene Id | Gene Name                                                                                                                                               | Molecular Function                              | Primary Localization  | Molecular Class                                      | Biological Process                                               | Domains           | Plasma Proteome Database |  |
|-------------|---------|-----------------------------------------------------------------------|-------------------|------------|-------------------|------------|--------|----------------------------------------------------------|----------------------------------------------------------|----------------------------------------------------------------------------------------|----------------------------------------------------------------------------------------|-----------------------------------------------------------------------------------------------|-----------------------------------------------------------------------------------------------|--------------------------------------------------------------------------------|--------------------------------------------------------------------------------|---------|----------------|---------------------------------------------------------------------------------------------------------------------------------------------------------|-------------------------------------------------|-----------------------|------------------------------------------------------|------------------------------------------------------------------|-------------------|--------------------------|--|
| DLD         | 1738    | dihydropyridyl dehydrogenase, mitochondrial isoform 1 precursor       | NP_000099.2       | 4          | 15                | 15         | 38     | 1.03                                                     | 1.15                                                     | 5.28                                                                                   | 3.88                                                                                   | 25.8                                                                                          | 21.2                                                                                          | 22                                                                             | 22                                                                             | 2006    | 1738           | dihydropyridyl dehydrogenase (E3 component of pyruvate dehydrogenase complex, 2-oxoglutarate complex, branched chain ketone acid dehydrogenase complex) | Catalytic activity                              | Mitochondrion         | Enzyme: Dehydrogenase                                | Metabolism;Energy pathways                                       | -                 | Yes                      |  |
| TAOK3       | 51347   | serine/threonine-protein kinase TAO3                                  | NP_057365.3       | 4          | 5                 | 7          | 11     | 1.03                                                     | 1.14                                                     | 9.4                                                                                    | 4.54                                                                                   | 16.8                                                                                          | 9                                                                                             | 3                                                                              | 3                                                                              | 11620   | 51347          | TAO kinase 3                                                                                                                                            | Protein serine/threonine kinase activity        | -                     | Serine/threonine kinase                              | Cell communication;Signal transduction                           | S_T_kinase;CC     | Yes                      |  |
| COPB2       | 9276    | coatamer subunit beta'                                                | NP_004757.1       | 1          | 33                | 33         | 112    | 1.03                                                     | 1.14                                                     | 3.25                                                                                   | 2.92                                                                                   | 27.2                                                                                          | 27.2                                                                                          | 64                                                                             | 64                                                                             | 6103    | 9276           | coatamer protein complex, subunit beta 2 (betapime)                                                                                                     | Transporter activity                            | Cytoplasm             | Transport/cargo protein                              | Transport                                                        | WD40              | Yes                      |  |
| DDI2        | 84301   | protein DDI1 homolog 2                                                | NP_115717.3       | 1          | 1                 | 1          | 2      | 1.03                                                     | 1.14                                                     | 1.14                                                                                   | 1.14                                                                                   | 1.03                                                                                          | 1.14                                                                                          | 1                                                                              | 1                                                                              | 18702   | 84301          | None                                                                                                                                                    | Ubiquitin-specific protease activity            | Cytoplasm             | Ubiquitin proteasome system protein                  | Protein metabolism                                               | UBQ               | Yes                      |  |
| MRPS9       | 64965   | 28S ribosomal protein S9, mitochondrial                               | NP_872578.1       | 1          | 9                 | 9          | 23     | 1.03                                                     | 1.14                                                     | 10.93                                                                                  | 6.25                                                                                   | 38.5                                                                                          | 24                                                                                            | 11                                                                             | 11                                                                             | 17602   | 64965          | mitochondrial ribosomal protein S9                                                                                                                      | Structural constituent of ribosome              | Mitochondrion         | Ribosomal subunit                                    | Protein metabolism                                               | SP                | Yes                      |  |
| TOR1A       | 1861    | tor1in-1A precursor                                                   | NP_000104.1       | 1          | 4                 | 4          | 5      | 1.03                                                     | 1.13                                                     | 8.11                                                                                   | 4.36                                                                                   | 14.5                                                                                          | 8.6                                                                                           | 3                                                                              | 3                                                                              | 6897    | 1861           | tor1in family 1, member A (tor1in A)                                                                                                                    | Chaperone activity                              | Endoplasmic reticulum | Chaperone                                            | Protein metabolism                                               | SP                | Yes                      |  |
| GNPNAT1     | 64841   | glucosamine 6-phosphate N-acetyltransferase                           | NP_932332.1       | 1          | 6                 | 6          | 15     | 1.03                                                     | 1.13                                                     | 9.25                                                                                   | 43.55                                                                                  | 23.6                                                                                          | 182.3                                                                                         | 6                                                                              | 6                                                                              | 17046   | 64841          | glucosamine-6-phosphate N-acetyltransferase 1                                                                                                           | Acyltransferase activity                        | -                     | Enzyme: Acyltransferase                              | Metabolism;Energy pathways                                       | -                 | Yes                      |  |
| PLOD2       | 5352    | procollagen-lysine,2-oxoglutarate 5-dioxygenase 2 isoform 1 precursor | NP_891988.1       | 2          | 16                | 16         | 45     | 1.03                                                     | 1.13                                                     | 3.44                                                                                   | 5.09                                                                                   | 16.8                                                                                          | 27.6                                                                                          | 22                                                                             | 22                                                                             | 3519    | 5352           | procollagen-lysine, 2-oxoglutarate 5-dioxygenase 2                                                                                                      | Catalytic activity                              | Endoplasmic reticulum | Enzyme: Hydroxylase                                  | Metabolism;Energy pathways                                       | SP;P4HC           | Yes                      |  |
| SOAT1       | 6646    | sterol O-acyltransferase 1 isoform 1                                  | NP_003092.4       | 3          | 1                 | 1          | 1      | 1.03                                                     | 1.13                                                     | 1.13                                                                                   | 1.13                                                                                   | 1.03                                                                                          | 1.13                                                                                          | 1                                                                              | 1                                                                              | 33      | 6646           | sterol O-acyltransferase (acyl-Coenzyme A:cholesterol acyltransferase) 1                                                                                | Acyltransferase activity                        | Endoplasmic reticulum | Enzyme: Acyltransferase                              | Metabolism;Energy pathways                                       | TM                | Yes                      |  |
| AP2B1       | 163     | AP-2 complex subunit beta isoform a                                   | NP_001025177.1    | 2          | 19                | 32         | 127    | 1.03                                                     | 1.1                                                      | 4.41                                                                                   | 4.24                                                                                   | 26.9                                                                                          | 27.7                                                                                          | 34                                                                             | 34                                                                             | 3015    | 163            | adaptor-related protein complex 2, beta 1 subunit                                                                                                       | Molecular function unknown;Transporter activity | Plasma membrane       | Unclassified;Transport/cargo protein                 | Biological processes unknown;Transport                           | ADAP              | No                       |  |
| TRMT10C     | 54931   | mitochondrial ribonuclease P protein 1 precursor                      | NP_060289.2       | 1          | 13                | 13         | 30     | 1.03                                                     | 1.1                                                      | 4.79                                                                                   | 5.78                                                                                   | 21.2                                                                                          | 27.4                                                                                          | 18                                                                             | 18                                                                             |         |                |                                                                                                                                                         |                                                 |                       |                                                      |                                                                  |                   |                          |  |
| FARSB       | 10056   | phenylalanine-tRNA ligase beta subunit                                | NP_005678.3       | 1          | 21                | 22         | 66     | 1.03                                                     | 1.09                                                     | 3.04                                                                                   | 3.07                                                                                   | 18.2                                                                                          | 19.4                                                                                          | 33                                                                             | 33                                                                             | 9947    | 10056          | phenylalanine-tRNA synthetase-like, betasubunit                                                                                                         | Ligase activity                                 | Cytoplasm             | Enzyme: Ligase                                       | Protein metabolism                                               | -                 | Yes                      |  |
| RDX         | 5962    | radixin isoform 1                                                     | NP_001247422.1    | 5          | 17                | 29         | 131    | 1.03                                                     | 1.09                                                     | 3.26                                                                                   | 2.53                                                                                   | 18.2                                                                                          | 15                                                                                            | 29                                                                             | 29                                                                             | 1534    | 5962           | radixin                                                                                                                                                 | Cytoskeletal protein binding                    | Plasma membrane       | Cytoskeletal associated protein                      | Cell growth and/or maintenance                                   | B41;CC;ERM        | Yes                      |  |
| PAN3        | 255967  | PAB-dependent poly(A)-specific ribonuclease subunit PAN3              | NP_787050.6       | 1          | 1                 | 1          | 2      | 1.03                                                     | 1.09                                                     | 1.09                                                                                   | 1.09                                                                                   | 1.03                                                                                          | 1.09                                                                                          | 1                                                                              | 1                                                                              | 17818   | 255967         | None                                                                                                                                                    | Ribonuclease activity                           | Cytoplasm             | Ribonuclease                                         | Regulation of nucleobase, nucleotide and nucleic acid metabolism | S_T_Y_Kinase      | No                       |  |
| RBM39       | 9584    | RNA-binding protein 39 isoform a                                      | NP_909122.1       | 7          | 12                | 12         | 44     | 1.03                                                     | 1.09                                                     | 3.11                                                                                   | 5.93                                                                                   | 15.5                                                                                          | 31.6                                                                                          | 23                                                                             | 23                                                                             | 9201    | 9584           | RNA-binding region (RNP1, RRM) containing 2                                                                                                             | RNA binding;Transcription regulator activity    | Nucleus               | RNA binding protein;Transcription regulatory protein | Regulation of nucleobase, nucleotide and nucleic acid metabolism | RRM               | Yes                      |  |
| MECP2       | 4204    | methyl-CpG-binding protein 2 isoform 2                                | NP_001104262.1    | 2          | 4                 | 4          | 7      | 1.03                                                     | 1.08                                                     | 3.04                                                                                   | 7.82                                                                                   | 6.3                                                                                           | 17                                                                                            | 4                                                                              | 4                                                                              | 2050    | 4204           | methyl CpG binding protein 2 (Rett syndrome)                                                                                                            | DNA binding                                     | Nucleus               | DNA binding protein                                  | Regulation of nucleobase, nucleotide and nucleic acid metabolism | MBD               | Yes                      |  |
| CFAP20      | 29105   | cilia- and flagella-associated protein 20                             | NP_037374.1       | 1          | 3                 | 3          | 7      | 1.03                                                     | 1.08                                                     | 8.87                                                                                   | 0.01                                                                                   | 16                                                                                            | 0                                                                                             | 3                                                                              | 3                                                                              |         |                |                                                                                                                                                         |                                                 |                       |                                                      |                                                                  |                   |                          |  |
| RAF1        | 5894    | RAF proto-oncogene serine/threonine-protein kinase                    | NP_002871.1       | 1          | 1                 | 2          | 3      | 1.03                                                     | 1.07                                                     | 1.07                                                                                   | 1.07                                                                                   | 1.03                                                                                          | 1.07                                                                                          | 1                                                                              | 1                                                                              | 1265    | 5894           | v-raf-1 murine leukemia viral oncogene homolog 1                                                                                                        | Protein serine/threonine kinase activity        | Cytoplasm             | Serine/threonine kinase                              | Cell communication;Signal transduction                           | RBD;C1;S_T_kinase | Yes                      |  |
| WDR43       | 23160   | WD repeat-containing protein 43                                       | NP_055946.1       | 1          | 6                 | 6          | 9      | 1.03                                                     | 1.07                                                     | 11.69                                                                                  | 16.4                                                                                   | 30.1                                                                                          | 45.2                                                                                          | 6                                                                              | 6                                                                              | 19518   | 23160          | WD repeat domain 43                                                                                                                                     | Molecular function unknown                      | -                     | Unclassified                                         | Biological processes unknown                                     | WD40              | Yes                      |  |
| ZC3H13      | 23091   | zinc finger CCHC domain-containing protein 13                         | NP_055885.3       | 1          | 1                 | 1          | 2      | 1.03                                                     | 1.07                                                     | 1.07                                                                                   | 1.07                                                                                   | 1.03                                                                                          | 1.07                                                                                          | 1                                                                              | 1                                                                              | 8307    | 23091          | KIAA0853                                                                                                                                                | Transcription regulator activity                | -                     | Transcription regulatory protein                     | Regulation of nucleobase, nucleotide and nucleic acid metabolism | CC;ZnF_C3H1       | Yes                      |  |
| AKAP8L      | 26993   | A-kinase anchor protein 8-like isoform 1                              | NP_055186.3       | 2          | 4                 | 4          | 10     | 1.03                                                     | 1.07                                                     | 6.62                                                                                   | 10.41                                                                                  | 15.3                                                                                          | 25.3                                                                                          | 5                                                                              | 5                                                                              | 10641   | 26993          | A kinase (PKKA) anchor protein 8-like                                                                                                                   | DNA binding                                     | Nucleus               | DNA binding protein                                  | Regulation of nucleobase, nucleotide and nucleic acid metabolism | NLS;ZNFC2         | Yes                      |  |
| ANAPC4      | 29945   | anaphase-promoting complex subunit 4 isoform 1                        | NP_001273685.1    | 2          | 2                 | 2          | 4      | 1.03                                                     | 1.06                                                     | 12.78                                                                                  | 13.68                                                                                  | 18.7                                                                                          | 20.6                                                                                          | 2                                                                              | 2                                                                              | 9505    | 29945          | anaphase promoting complex subunit 4                                                                                                                    | Molecular function unknown                      | Nucleus               | Cell cycle control protein                           | Cell communication;Signal transduction                           | -                 | Yes                      |  |
| BPNT1       | 10380   | 3'(2',5'-bisphosphate nucleotidase 1 isoform 1                        | NP_006076.4       | 3          | 12                | 12         | 34     | 1.03                                                     | 1.05                                                     | 4.65                                                                                   | 5.51                                                                                   | 21                                                                                            | 25.7                                                                                          | 19                                                                             | 19                                                                             | 6814    | 10380          | 3'(2',5'-bisphosphate nucleotidase 1                                                                                                                    | Hydrolase activity                              | -                     | Enzyme: Esterase                                     | Cell communication;Signal transduction                           | L_Phosphatase     | No                       |  |

Supplementary Table S1. List of quantified proteins in OKF6/TERT1-Smoke cells  
 Raigopaln *et al.*, 2017. Role of protein kinase N2 (PKN2) in cigarette smoke-mediated oncogenic transformation of oral cells

| Gene Symbol | Gene ID | Protein Description                                                          | Protein Accession | # Proteins | # Unique Peptides | # Peptides | # PSMs | OKF6/TERT1-Smoke/OKF6/TERT1-Parental (130/126) R1 | OKF6/TERT1-Smoke/OKF6/TERT1-Parental (128/127) R2 | Ratio Standard Errors [%]: OKF6/TERT1-Smoke/OKF6/TERT1-Parental (130/126) R1 | Ratio Standard Errors [%]: OKF6/TERT1-Smoke/OKF6/TERT1-Parental (128/127) R2 | Ratio Variabilities [%]: F13: OKF6/TERT1-Smoke/OKF6/TERT1-Parental (130/126) R1 | Ratio Variabilities [%]: F13: OKF6/TERT1-Smoke/OKF6/TERT1-Parental (128/127) R2 | Ratio Counts: F13: OKF6/TERT1-Smoke/OKF6/TERT1-Parental (130/126) R1 | Ratio Counts: F13: OKF6/TERT1-Smoke/OKF6/TERT1-Parental (128/127) R2 | HPRD ID | Entrez Gene Id | Gene Name                                              | Molecular Function                          | Primary Localization | Molecular Class                    | Biological Process                                               | Domains                                | Plasma Proteome Database |
|-------------|---------|------------------------------------------------------------------------------|-------------------|------------|-------------------|------------|--------|---------------------------------------------------|---------------------------------------------------|------------------------------------------------------------------------------|------------------------------------------------------------------------------|---------------------------------------------------------------------------------|---------------------------------------------------------------------------------|----------------------------------------------------------------------|----------------------------------------------------------------------|---------|----------------|--------------------------------------------------------|---------------------------------------------|----------------------|------------------------------------|------------------------------------------------------------------|----------------------------------------|--------------------------|
| DHX15       | 1665    | pre-mRNA-splicing factor ATP-dependent RNA helicase DHX15                    | NP_001349.2       | 1          | 31                | 31         | 105    | 1.03                                              | 1.05                                              | 3.02                                                                         | 3.9                                                                          | 23.6                                                                            | 31.6                                                                            | 56                                                                   | 56                                                                   | 4553    | 1665           | DEAH (Asp-Glu-Ala-His) box polypeptide 15              | RNA binding                                 | Nucleus              | RNA binding protein                | Regulation of nucleoside, nucleotide and nucleic acid metabolism | HELIC_DEXDc                            | Yes                      |
| FMR1        | 2332    | fragile X mental retardation protein 1 isoform ISO1                          | NP_002015.1       | 5          | 4                 | 6          | 11     | 1.03                                              | 1.05                                              | 2.49                                                                         | 5.05                                                                         | 5.8                                                                             | 11.9                                                                            | 5                                                                    | 5                                                                    | 2398    | 2332           | fragile X mental retardation 1                         | RNA binding                                 | Cytoplasm;Nucleus    | RNA binding protein                | Regulation of nucleoside, nucleotide and nucleic acid metabolism | KH                                     | Yes                      |
| NOP58       | 51602   | nucleolar protein 58                                                         | NP_057018.1       | 1          | 18                | 18         | 58     | 1.03                                              | 1.04                                              | 3.5                                                                          | 4.17                                                                         | 20.3                                                                            | 24.4                                                                            | 31                                                                   | 31                                                                   | 11036   | 51602          | None                                                   | Ribonucleoprotein                           | Nucleolus            | RNA binding protein                | Regulation of nucleoside, nucleotide and nucleic acid metabolism | CC                                     | Yes                      |
| GFM1        | 85476   | elongation factor G, mitochondrial isoform 2                                 | NP_079272.4       | 3          | 9                 | 9          | 18     | 1.03                                              | 1.04                                              | 5.48                                                                         | 4.59                                                                         | 18                                                                              | 15.2                                                                            | 10                                                                   | 10                                                                   | 7365    | 85476          | Elongation factor, mitochondrial 1                     | Translation regulator activity              | Mitochondrion        | Translation regulatory protein     | Protein metabolism                                               | SP-GTP_EFTU;GTP_EFTU_D2                | Yes                      |
| SF3A2       | 8175    | splicing factor 3A subunit 2                                                 | NP_009096.2       | 1          | 3                 | 3          | 7      | 1.03                                              | 1.04                                              | 7.58                                                                         | 2.94                                                                         | 15.8                                                                            | 6.1                                                                             | 4                                                                    | 4                                                                    | 2877    | 8175           | splicing factor 3a, subunit 2, 66kDa                   | RNA binding                                 | Nucleus              | RNA binding protein                | Protein metabolism                                               | -                                      | Yes                      |
| RPL19       | 6143    | 60S ribosomal protein L19                                                    | NP_000972.1       | 1          | 7                 | 7          | 27     | 1.03                                              | 1.02                                              | 3.9                                                                          | 4.92                                                                         | 14                                                                              | 17.5                                                                            | 12                                                                   | 12                                                                   | 1594    | 6143           | ribosomal protein L19                                  | Structural constituent of ribosome          | Ribosome             | Ribosomal subunit                  | Protein metabolism                                               | CC                                     | Yes                      |
| SH3BP1      | 23616   | SH3 domain-binding protein 1                                                 | NP_061830.3       | 1          | 8                 | 8          | 19     | 1.03                                              | 1.02                                              | 4.03                                                                         | 2.18                                                                         | 13.2                                                                            | 6.7                                                                             | 10                                                                   | 9                                                                    | 10227   | 23616          | SH3-domain binding protein 1                           | GTPase activator activity                   | -                    | GTPase activating protein          | Cell communication;Signal transduction                           | CC;RHOGAP;BAR                          | Yes                      |
| SOWAHC      | 65124   | ankyrin repeat domain-containing protein SOWAHC                              | NP_075392.2       | 1          | 7                 | 7          | 14     | 1.03                                              | 1.01                                              | 6.81                                                                         | 2.67                                                                         | 20.1                                                                            | 7.6                                                                             | 8                                                                    | 8                                                                    | -       | -              | -                                                      | -                                           | -                    | -                                  | -                                                                | -                                      | -                        |
| MAP4        | 4134    | microtubule-associated protein 4 isoform 1                                   | NP_002366.2       | 3          | 47                | 47         | 126    | 1.03                                              | 0.99                                              | 3.35                                                                         | 5.69                                                                         | 30.4                                                                            | 50.9                                                                            | 74                                                                   | 73                                                                   | 1141    | 4134           | microtubule-associated protein 4                       | Cytoskeletal protein binding                | Cytoplasm;Nucleus    | Cytoskeletal associated protein    | Cell growth and/or maintenance                                   | -                                      | Yes                      |
| UQCRC1      | 7384    | cytochrome b-c1 complex subunit 1, mitochondrial precursor                   | NP_003356.2       | 1          | 16                | 16         | 58     | 1.03                                              | 0.98                                              | 8.44                                                                         | 6.71                                                                         | 47.5                                                                            | 35.3                                                                            | 27                                                                   | 27                                                                   | 1875    | 7384           | ubiquinol-cytochrome c reductase core protein          | Catalytic activity                          | Mitochondrion        | Enzyme: Reductase                  | Metabolism;Energy pathways                                       | -                                      | Yes                      |
| ZDHHC13     | 54503   | palmitoyltransferase ZDHHC13 isoform 1                                       | NP_061901.2       | 2          | 2                 | 2          | 5      | 1.03                                              | 0.98                                              | 2.24                                                                         | 3.67                                                                         | 4.6                                                                             | 7.2                                                                             | 4                                                                    | 4                                                                    | 15710   | 54503          | zinc finger, DHHC-type containing 13                   | Molecular function unknown                  | Integral to membrane | Unclassified                       | Biological process unknown                                       | ANK;TM                                 | Yes                      |
| TWF1        | 5756    | twinstin-1 isoform 2                                                         | NP_002813.3       | 2          | 7                 | 8          | 20     | 1.03                                              | 0.97                                              | 3.52                                                                         | 6.67                                                                         | 11.5                                                                            | 18.4                                                                            | 10                                                                   | 8                                                                    | 10174   | 5756           | PTK9 protein tyrosine kinase 9                         | Protein-tyrosine kinase activity            | Cytoplasm            | Tyrosine kinase                    | Cell communication;Signal transduction                           | ADF                                    | Yes                      |
| VCAN        | 1462    | versican core protein isoform 1 precursor                                    | NP_004376.2       | 4          | 6                 | 6          | 11     | 1.03                                              | 0.97                                              | 14.57                                                                        | 29.85                                                                        | 38.1                                                                            | 81                                                                              | 6                                                                    | 6                                                                    | 340     | 1462           | chondroitin sulfate proteoglycan 2 (versican)          | Extracellular matrix structural constituent | Extracellular        | Extracellular matrix protein       | Cell growth and/or maintenance                                   | IGLINK;EGFL1;GFCAL;ECTN1;C.SUSH;SP;EGF | Yes                      |
| KCTD12      | 115207  | BTB/POZ domain-containing protein KCTD12                                     | NP_612453.1       | 1          | 15                | 15         | 43     | 1.03                                              | 0.97                                              | 4.56                                                                         | 3.32                                                                         | 22.4                                                                            | 15.5                                                                            | 22                                                                   | 23                                                                   | 11060   | 115207         | potassium channel tetramerisation domain-containing 12 | Ion channel activity                        | -                    | Ion channel                        | Transport                                                        | BTB                                    | Yes                      |
| Sep-02      | 4735    | sepin-2 isoform b                                                            | NP_001269901.1    | 3          | 15                | 15         | 62     | 1.03                                              | 0.96                                              | 3.19                                                                         | 2.83                                                                         | 17.8                                                                            | 14.7                                                                            | 29                                                                   | 29                                                                   | -       | -              | -                                                      | -                                           | -                    | -                                  | -                                                                | -                                      | -                        |
| RP25L       | 138716  | ribonuclease P protein subunit p25-like protein                              | NP_680544.1       | 1          | 2                 | 2          | 3      | 1.03                                              | 0.96                                              | -                                                                            | -                                                                            | -                                                                               | -                                                                               | 1                                                                    | 1                                                                    | -       | -              | -                                                      | -                                           | -                    | -                                  | -                                                                | -                                      | -                        |
| CAPNS1      | 826     | calpain small subunit 1 isoform 1                                            | NP_001740.1       | 3          | 11                | 11         | 82     | 1.03                                              | 0.95                                              | 7.35                                                                         | 14.06                                                                        | 49.2                                                                            | 98                                                                              | 38                                                                   | 38                                                                   | 240     | 826            | calpain, small subunit 1                               | Peptide binding                             | Cytoplasm            | Regulatory/other subunit           | Protein folding                                                  | EF                                     | Yes                      |
| NOL10       | 79954   | nucleolar protein 10 isoform 1                                               | NP_079170.2       | 3          | 3                 | 3          | 3      | 1.03                                              | 0.95                                              | 1.71                                                                         | 14.57                                                                        | 3.1                                                                             | 24.4                                                                            | 3                                                                    | 3                                                                    | 7849    | 79954          | None                                                   | Molecular function unknown                  | Nucleolus            | Unclassified                       | Biological process unknown                                       | CC                                     | No                       |
| ACTR2       | 10097   | actin-related protein 2 isoform b                                            | NP_005713.1       | 2          | 17                | 18         | 70     | 1.03                                              | 0.95                                              | 4.97                                                                         | 10.61                                                                        | 30.1                                                                            | 62.8                                                                            | 33                                                                   | 33                                                                   | 5023    | 10097          | ARP2 actin-related protein 2 homolog (ves1)            | Structural constituent of cytoskeleton      | Actin cytoskeleton   | Cytoskeletal protein               | Cell motility;Cell growth and/or maintenance                     | ACTIN                                  | Yes                      |
| MBOAT7      | 79143   | lysophospholipid acyltransferase 7 isoform 1                                 | NP_077274.3       | 3          | 5                 | 5          | 12     | 1.03                                              | 0.94                                              | 3.06                                                                         | 3                                                                            | 8.3                                                                             | 7.4                                                                             | 7                                                                    | 7                                                                    | 6925    | 79143          | leukocyte receptor cluster (LRC) member 4              | Receptor activity                           | Plasma membrane      | Integral membrane protein          | Biological process unknown                                       | TM                                     | No                       |
| MFN2        | 9927    | mitofusin-2                                                                  | NP_055689.1       | 1          | 5                 | 6          | 12     | 1.03                                              | 0.94                                              | 5.04                                                                         | 3.5                                                                          | 13.8                                                                            | 8.7                                                                             | 7                                                                    | 7                                                                    | 8495    | 9927           | mitofusin 2                                            | Molecular function unknown                  | Mitochondrion        | Unclassified                       | Metabolism;Energy pathways                                       | CC;TM                                  | Yes                      |
| NDRG1       | 10397   | protein NDRG1 isoform 1                                                      | NP_006087.2       | 3          | 9                 | 9          | 29     | 1.03                                              | 0.94                                              | 7.34                                                                         | 9.85                                                                         | 31                                                                              | 38.5                                                                            | 16                                                                   | 16                                                                   | 5586    | 10397          | N-myc downstream regulated gene 1                      | Molecular function unknown                  | Cytoplasm            | Unclassified                       | Cell communication;Signal transduction                           | ABH                                    | Yes                      |
| TLN1        | 7094    | ta1n-1                                                                       | NP_006280.3       | 2          | 120               | 120        | 551    | 1.03                                              | 0.93                                              | 1.48                                                                         | 2.07                                                                         | 25.2                                                                            | 32                                                                              | 262                                                                  | 261                                                                  | 1726    | 7094           | ta1n 1                                                 | Cytoskeletal protein binding                | Extracellular        | Cytoskeletal associated protein    | Cell growth and/or maintenance                                   | B41;CC                                 | Yes                      |
| NOP56       | 10528   | nucleolar protein 56                                                         | NP_006383.2       | 1          | 27                | 27         | 88     | 1.03                                              | 0.93                                              | 1.84                                                                         | 4.13                                                                         | 13.2                                                                            | 27.2                                                                            | 48                                                                   | 48                                                                   | 10119   | 10528          | nucleolar protein 5A (56kDa with KKE/D repeat)         | Molecular function unknown                  | Nucleolus            | Unclassified                       | Regulation of nucleoside, nucleotide and nucleic acid metabolism | -                                      | Yes                      |
| AGAP3       | 116988  | arf-GAP with GTPase, ANK repeat and PH domain-containing protein 3 isoform a | NP_114152.3       | 5          | 2                 | 2          | 4      | 1.03                                              | 0.92                                              | 9.05                                                                         | 5.59                                                                         | 13.2                                                                            | 7.3                                                                             | 2                                                                    | 2                                                                    | 16707   | 116988         | centaurin, gamma 3                                     | Molecular function unknown                  | -                    | Unclassified                       | Cell communication;Signal transduction                           | Small_GTPase;PH;ARFGAP;ANK             | Yes                      |
| RABGEF1     | 27342   | rab5 GDP/GTP exchange factor isoform b                                       | NP_001273990.1    | 2          | 1                 | 1          | 1      | 1.03                                              | 0.92                                              | -                                                                            | -                                                                            | -                                                                               | -                                                                               | 1                                                                    | 1                                                                    | 11477   | 27342          | RAB guanine nucleotide exchange factor (GEF1)          | Guanyl-nucleotide exchange factor activity  | -                    | Guanine nucleotide exchange factor | Cell communication;Signal transduction                           | ZaFA20;VPS9;C;C;C                      | Yes                      |
| UBR4        | 23352   | E3 ubiquitin-protein ligase UBR4                                             | NP_065816.2       | 1          | 40                | 40         | 91     | 1.03                                              | 0.92                                              | 3.18                                                                         | 2.92                                                                         | 23                                                                              | 18.8                                                                            | 48                                                                   | 48                                                                   | 10184   | 23352          | None                                                   | Molecular function unknown                  | Cytoplasm            | Unclassified                       | Biological process unknown                                       | -                                      | Yes                      |
| AAGAB       | 79719   | alpha- and gamma-adaptin-binding protein p34 isoform 1                       | NP_078942.3       | 1          | 2                 | 2          | 6      | 1.03                                              | 0.91                                              | 8.99                                                                         | 12.39                                                                        | 16.1                                                                            | 19.7                                                                            | 3                                                                    | 3                                                                    | 7754    | 79719          | None                                                   | Molecular function unknown                  | Nucleus              | Unclassified                       | Biological process unknown                                       | -                                      | No                       |
| CNH4        | 29097   | protein cornichon homolog 4 isoform 1                                        | NP_054903.1       | 3          | 1                 | 1          | 3      | 1.03                                              | 0.9                                               | 1.07                                                                         | 48.73                                                                        | 1.6                                                                             | 68.5                                                                            | 2                                                                    | 2                                                                    | 13709   | 29097          | None                                                   | Molecular function unknown                  | Integral to membrane | Unclassified                       | Biological process unknown                                       | TM                                     | No                       |

Supplementary Table S1. List of quantified proteins in OKF6/TERT1-Smoke cells  
 Raingopaln *et al.*, 2017. Role of protein kinase N2 (PKN2) in cigarette smoke-mediated oncogenic transformation of oral cells

| Gene Symbol | Gene ID | Protein Description                                                               | Protein Accession | # Proteins | # Unique Peptides | # Peptides | # PSMs | OKF6/TERT1-Smoke/<br>OKF6/TERT1-Parental<br>(130/126) R1 | OKF6/TERT1-Smoke/<br>OKF6/TERT1-Parental<br>(128/127) R2 | Ratio Standard Errors [%]:<br>OKF6/TERT1-Smoke/<br>OKF6/TERT1-Parental<br>(130/126) R1 | Ratio Standard Errors [%]:<br>OKF6/TERT1-Smoke/<br>OKF6/TERT1-Parental<br>(128/127) R2 | Ratio Variabilities [%]:<br>F13: OKF6/TERT1-<br>Smoke/<br>OKF6/TERT1-Parental<br>(130/126) R1 | Ratio Variabilities [%]:<br>F13: OKF6/TERT1-<br>Smoke/<br>OKF6/TERT1-Parental<br>(128/127) R2 | Ratio Counts: F13:<br>OKF6/TERT1-Smoke/<br>OKF6/TERT1-Parental<br>(130/126) R1 | Ratio Counts: F13:<br>OKF6/TERT1-Smoke/<br>OKF6/TERT1-Parental<br>(128/127) R2 | HPRD ID | Entrez Gene ID | Gene Name                                                                                      | Molecular Function                           | Primary Localization  | Molecular Class                     | Biological Process                                                           | Domains           | Plasma Proteome Database |
|-------------|---------|-----------------------------------------------------------------------------------|-------------------|------------|-------------------|------------|--------|----------------------------------------------------------|----------------------------------------------------------|----------------------------------------------------------------------------------------|----------------------------------------------------------------------------------------|-----------------------------------------------------------------------------------------------|-----------------------------------------------------------------------------------------------|--------------------------------------------------------------------------------|--------------------------------------------------------------------------------|---------|----------------|------------------------------------------------------------------------------------------------|----------------------------------------------|-----------------------|-------------------------------------|------------------------------------------------------------------------------|-------------------|--------------------------|
| PARD3       | 56288   | partitioning defective 3 homolog isoform 3                                        | NP_001171715.1    | 11         | 7                 | 7          | 13     | 1.03                                                     | 0.9                                                      | 15.36                                                                                  | 6.98                                                                                   | 50.2                                                                                          | 19                                                                                            | 9                                                                              | 9                                                                              | 5994    | 56288          | par-3 partitioning defective 3 homolog (C.elegans)                                             | Receptor signaling complex scaffold activity | Cytoplasm             | Adapter molecule                    | Cell communication;Signal transduction                                       | PDZ,CC            | Yes                      |
| MED20       | 9477    | mediator of RNA polymerase II transcription subunit 20 isoform 1                  | NP_004266.2       | 3          | 3                 | 3          | 5      | 1.03                                                     | 0.9                                                      | 6.79                                                                                   | 11.16                                                                                  | 12.1                                                                                          | 17.6                                                                                          | 3                                                                              | 3                                                                              | 15638   | 9477           | Trf (TATA binding protein-related factor)-proximal homolog (Drosophila)                        | Transcription regulator activity             | -                     | Transcription regulatory protein    | Regulation of nucleobase, nucleoside, nucleotide and nucleic acid metabolism | -                 | No                       |
| SMC4        | 10051   | structural maintenance of chromosomes protein 4 isoform 1                         | NP_005487.3       | 2          | 12                | 12         | 21     | 1.03                                                     | 0.9                                                      | 6.23                                                                                   | 8.01                                                                                   | 23.4                                                                                          | 26.6                                                                                          | 13                                                                             | 13                                                                             | 9276    | 10051          | SMC4 structural maintenance of chromosomes4-like 1 (yeast)                                     | Structural constituent of chromatin          | Nucleus               | Structural protein                  | Chromosome organization and biogenesis (sensu Eukarya)                       | CC                | Yes                      |
| NAE1        | 8883    | NEDD8-activating enzyme E1 regulatory subunit isoform d                           | NP_001273429.1    | 4          | 11                | 11         | 25     | 1.03                                                     | 0.89                                                     | 4.47                                                                                   | 9.43                                                                                   | 17.4                                                                                          | 32.2                                                                                          | 14                                                                             | 14                                                                             | 4545    | 8883           | amyloid beta precursor protein binding protein 1                                               | Receptor signaling complex scaffold activity | Cytoplasm             | Adapter molecule                    | Cell communication;Signal transduction                                       | -                 | Yes                      |
| MED19       | 219541  | mediator of RNA polymerase II transcription subunit 19                            | NP_703151.1       | 1          | 1                 | 1          | 2      | 1.03                                                     | 0.87                                                     |                                                                                        |                                                                                        |                                                                                               |                                                                                               | 1                                                                              | 1                                                                              | 17477   | 219541         | mediator of RNA polymerase II transcription, subunit 19 homolog (yeast)                        | Structural molecule activity                 | Nucleus               | Structural protein                  | Cell growth and/or maintenance                                               | -                 | No                       |
| SEC62       | 7095    | translocation protein SEC62                                                       | NP_003253.1       | 1          | 4                 | 4          | 7      | 1.03                                                     | 0.85                                                     | 11.75                                                                                  | 5.07                                                                                   | 27.5                                                                                          | 9.6                                                                                           | 5                                                                              | 5                                                                              | 3706    | 7095           | translocation protein 1                                                                        | Transporter activity                         | Endoplasmic reticulum | Transport/cargo protein             | Protein metabolism                                                           | CC,TM             | No                       |
| GNL2        | 29889   | nucleolar GTP-binding protein 2                                                   | NP_037417.1       | 1          | 3                 | 3          | 4      | 1.03                                                     | 0.84                                                     | 0.07                                                                                   | 0.98                                                                                   | 0.1                                                                                           | 1.4                                                                                           | 3                                                                              | 3                                                                              | 11006   | 29889          | guanine nucleotide binding protein-like 2(molecular)                                           | GTPase activity                              | Nucleolus             | GTPase                              | Cell communication;Signal transduction                                       | CC                | Yes                      |
| PCF1        | 51077   | rRNA-processing protein PCF1 homolog                                              | NP_057046.1       | 1          | 1                 | 1          | 2      | 1.03                                                     | 0.83                                                     |                                                                                        |                                                                                        |                                                                                               |                                                                                               | 1                                                                              | 1                                                                              | 12633   | 51077          | chromosome 14 open reading frame 111                                                           | Ribonuclease activity                        | Nucleolus             | Ribonuclease                        | Biological_process unknown                                                   | PNc               | No                       |
| TANC2       | 26115   | protein TANC2                                                                     | NP_079461.2       | 1          | 3                 | 3          | 5      | 1.03                                                     | 0.82                                                     | 3.93                                                                                   | 8.27                                                                                   | 7                                                                                             | 11.8                                                                                          | 3                                                                              | 3                                                                              | 10894   | 26115          | None                                                                                           | Molecular function unknown                   | -                     | Unclassified                        | Biological_process unknown                                                   | ANK,TPR           | No                       |
| NIPSNAP1    | 8508    | protein NipSnap homolog 1 isoform 1                                               | NP_003625.2       | 2          | 3                 | 3          | 7      | 1.03                                                     | 0.8                                                      | 1.77                                                                                   | 3.04                                                                                   | 3.7                                                                                           | 4.9                                                                                           | 4                                                                              | 4                                                                              | 10342   | 8508           | nipSnap homolog 1 (C. elegans)                                                                 | Molecular function unknown                   | Mitochondrion         | Unclassified                        | Biological_process unknown                                                   | -                 | Yes                      |
| NDUFV3      | 4731    | NADH dehydrogenase [ubiquinone] flavoprotein 3, mitochondrial isoform a precursor | NP_066553.3       | 1          | 2                 | 2          | 2      | 1.03                                                     | 0.78                                                     | 17.55                                                                                  | 13.69                                                                                  | 25.9                                                                                          | 15.1                                                                                          | 2                                                                              | 2                                                                              | 3716    | 4731           | NADH dehydrogenase (ubiquinone) flavoprotein3, 10kDa                                           | Oxidoreductase activity                      | Mitochondrion         | Enzyme: Oxidoreductase              | Metabolism;Energy pathways                                                   | -                 | Yes                      |
| TRMT2A      | 27037   | tRNA (uracil-5)-methyltransferase homolog A isoform a                             | NP_892029.2       | 2          | 2                 | 2          | 3      | 1.03                                                     | 0.73                                                     |                                                                                        |                                                                                        |                                                                                               |                                                                                               | 1                                                                              | 1                                                                              | 13719   | 27037          | None                                                                                           | Molecular function unknown                   | -                     | Unclassified                        | Biological_process unknown                                                   | RRM               | Yes                      |
| AGPAT5      | 55326   | 1-acyl-sn-glycerol-3-phosphate acyltransferase epsilon                            | NP_060831.2       | 1          | 5                 | 5          | 11     | 1.03                                                     | 0.72                                                     | 15.3                                                                                   | 22.55                                                                                  | 40.2                                                                                          | 41.3                                                                                          | 6                                                                              | 6                                                                              | 12438   | 55326          | 1-acylglycerol-3-phosphate O-acyltransferase 5(lysophosphatidic acid acyltransferase, epsilon) | Transferase activity                         | Integral to membrane  | Enzyme: Transferase                 | Metabolism;Energy pathways                                                   | TM,PISC           | Yes                      |
| TEFM        | 79736   | transcription elongation factor, mitochondrial                                    | NP_078959.3       | 1          | 2                 | 2          | 3      | 1.03                                                     | 0.51                                                     |                                                                                        |                                                                                        |                                                                                               |                                                                                               | 1                                                                              | 1                                                                              |         |                |                                                                                                |                                              |                       |                                     |                                                                              |                   |                          |
| GTF2F2      | 2963    | general transcription factor IIF subunit 2                                        | NP_004119.1       | 1          | 3                 | 3          | 3      | 1.02                                                     | 1.85                                                     | 2.45                                                                                   | 23.43                                                                                  | 4.3                                                                                           | 87.1                                                                                          | 3                                                                              | 3                                                                              | 1804    | 2963           | general transcription factor IIF, polypeptide2, 30kDa                                          | Transcription factor activity                | Nucleus               | Transcription factor                | Regulation of nucleobase, nucleoside, nucleotide and nucleic acid metabolism | -                 | Yes                      |
| SFI1        | 7536    | splicing factor 1 isoform 6                                                       | NP_001171501.1    | 6          | 8                 | 8          | 16     | 1.02                                                     | 1.78                                                     | 6.63                                                                                   | 8.48                                                                                   | 19.3                                                                                          | 44.8                                                                                          | 8                                                                              | 8                                                                              | 3306    | 7536           | splicing factor 1                                                                              | RNA binding                                  | Nucleus;Cytoplasm     | RNA binding protein                 | Regulation of nucleobase, nucleoside, nucleotide and nucleic acid metabolism | KH,ZnF,C2HC,NLS   | Yes                      |
| PSMA6       | 5687    | proteasome subunit alpha type-6 isoform a                                         | NP_002782.1       | 3          | 9                 | 9          | 25     | 1.02                                                     | 1.57                                                     | 3.35                                                                                   | 4.37                                                                                   | 11.9                                                                                          | 24.1                                                                                          | 12                                                                             | 12                                                                             | 4171    | 5687           | proteasome (prosome, macropain) subunit, alpha type 6                                          | Ubiquitin-specific protease activity         | Cytoplasm             | Ubiquitin proteasome system protein | Protein metabolism                                                           | -                 | Yes                      |
| GON4L       | 54856   | GON-4-like protein isoform c                                                      | NP_001269785.1    | 2          | 1                 | 1          | 2      | 1.02                                                     | 1.55                                                     |                                                                                        |                                                                                        |                                                                                               |                                                                                               | 1                                                                              | 1                                                                              | 13370   | 54856          | None                                                                                           | DNA binding                                  | Nucleus               | DNA binding protein                 | Biological_process unknown                                                   | SANT              | Yes                      |
| RABGAP1L    | 9910    | rab GTPase-activating protein 1-like isoform A                                    | NP_055672.3       | 1          | 1                 | 1          | 1      | 1.02                                                     | 1.49                                                     |                                                                                        |                                                                                        |                                                                                               |                                                                                               | 1                                                                              | 1                                                                              | 16464   | 9910           | RAB GTPase activating protein 1-like                                                           | GTPase activator activity                    | -                     | GTPase activating protein           | Biological_process unknown                                                   | PTB,TBC           | No                       |
| DHFR        | 1719    | dihydrofolate reductase isoform 1                                                 | NP_000782.1       | 2          | 1                 | 1          | 2      | 1.02                                                     | 1.4                                                      |                                                                                        |                                                                                        |                                                                                               |                                                                                               | 1                                                                              | 1                                                                              | 519     | 1719           | dihydrofolate reductase                                                                        | Oxidoreductase activity                      | Cytoplasm             | Enzyme: Oxidoreductase              | Regulation of nucleobase, nucleoside, nucleotide and nucleic acid metabolism | -                 | Yes                      |
| HMGCS1      | 3157    | hydroxymethylglutaryl-CoA synthase, cytoplasmic                                   | NP_001091742.1    | 3          | 15                | 15         | 54     | 1.02                                                     | 1.38                                                     | 5.69                                                                                   | 3.51                                                                                   | 32.1                                                                                          | 26.5                                                                                          | 29                                                                             | 29                                                                             | 7515    | 3157           | 3-hydroxy-3-methylglutaryl-Coenzyme A synthase 1 (soluble)                                     | CoA-ligase activity                          | Cytoplasm             | Enzyme: Synthase                    | Metabolism;Energy pathways                                                   | -                 | Yes                      |
| RRM1        | 6240    | ribonucleoside-diphosphate reductase large subunit                                | NP_001024.1       | 1          | 16                | 16         | 41     | 1.02                                                     | 1.37                                                     | 5.03                                                                                   | 5.46                                                                                   | 21.4                                                                                          | 31.7                                                                                          | 17                                                                             | 17                                                                             | 1588    | 6240           | ribonucleoside reductase M1 polypeptide                                                        | Oxidoreductase activity                      | Cytoplasm             | Cell cycle control protein          | Regulation of nucleobase, nucleoside, nucleotide and nucleic acid metabolism | -                 | Yes                      |
| ZRANB2      | 9406    | zinc finger Ran-binding domain-containing protein 2 isoform 1                     | NP_976225.1       | 2          | 5                 | 5          | 7      | 1.02                                                     | 1.34                                                     | 2.68                                                                                   | 10.94                                                                                  | 6.1                                                                                           | 33.7                                                                                          | 5                                                                              | 5                                                                              | 9185    | 9406           | zinc finger protein 265                                                                        | RNA binding                                  | Nucleus;Cytoplasm     | RNA binding protein                 | Regulation of nucleobase, nucleoside, nucleotide and nucleic acid metabolism | ZnF,RBZ,NLS       | Yes                      |
| CELF1       | 10658   | CUGBP Elav-like family member 1 isoform 4                                         | NP_001166110.1    | 9          | 5                 | 5          | 7      | 1.02                                                     | 1.34                                                     | 18.81                                                                                  | 24.99                                                                                  | 39.8                                                                                          | 75.1                                                                                          | 4                                                                              | 4                                                                              |         |                |                                                                                                |                                              |                       |                                     |                                                                              |                   |                          |
| SPTBN2      | 6712    | spectrin beta chain, non-erythrocytic 2                                           | NP_008877.1       | 1          | 5                 | 9          | 20     | 1.02                                                     | 1.32                                                     | 4.89                                                                                   | 13.13                                                                                  | 11.2                                                                                          | 40.2                                                                                          | 5                                                                              | 5                                                                              | 5404    | 6712           | spectrin, beta, non-erythrocytic 2                                                             | Cytoskeletal protein binding                 | Golgi apparatus       | Cytoskeletal associated protein     | Cell growth and/or maintenance                                               | CH,SPECTRIN,P,HCC | Yes                      |

Supplementary Table S1. List of quantified proteins in OKF6/TERT1-Smoke cells  
 Raingopaln *et al.*, 2017. Role of protein kinase N2 (PKN2) in cigarette smoke-mediated oncogenic transformation of oral cells

| Gene Symbol | Gene ID | Protein Description                                                                  | Protein Accession | # Proteins | # Unique Peptides | # Peptides | # PSMs | OKF6/TERT1-Smoke/<br>OKF6/TERT1-Parental<br>(130/126) R1 | OKF6/TERT1-Smoke/<br>OKF6/TERT1-Parental<br>(128/127) R2 | Ratio Standard Errors [%]:<br>OKF6/TERT1-Smoke/<br>OKF6/TERT1-Parental<br>(130/126) R1 | Ratio Standard Errors [%]:<br>OKF6/TERT1-Smoke/<br>OKF6/TERT1-Parental<br>(128/127) R2 | Ratio Variabilities [%]:<br>F13: OKF6/TERT1-<br>Smoke/<br>OKF6/TERT1-Parental<br>(130/126) R1 | Ratio Variabilities [%]:<br>F13: OKF6/TERT1-<br>Smoke/<br>OKF6/TERT1-Parental<br>(128/127) R2 | Ratio Counts: F13:<br>OKF6/TERT1-Smoke/<br>OKF6/TERT1-Parental<br>(130/126) R1 | Ratio Counts: F13:<br>OKF6/TERT1-Smoke/<br>OKF6/TERT1-Parental<br>(128/127) R2 | HPRD ID | Entrez Gene ID | Gene Name                                                           | Molecular Function                   | Primary Localization | Molecular Class                     | Biological Process                                                           | Domains                     | Plasma Proteome Database |
|-------------|---------|--------------------------------------------------------------------------------------|-------------------|------------|-------------------|------------|--------|----------------------------------------------------------|----------------------------------------------------------|----------------------------------------------------------------------------------------|----------------------------------------------------------------------------------------|-----------------------------------------------------------------------------------------------|-----------------------------------------------------------------------------------------------|--------------------------------------------------------------------------------|--------------------------------------------------------------------------------|---------|----------------|---------------------------------------------------------------------|--------------------------------------|----------------------|-------------------------------------|------------------------------------------------------------------------------|-----------------------------|--------------------------|
| ASCC1       | 51008   | activating signal cointegrator 1 complex subunit 1 isoform a                         | NP_001185728.1    | 2          | 1                 | 1          | 2      | 1.02                                                     | 1.31                                                     |                                                                                        |                                                                                        |                                                                                               |                                                                                               | 1                                                                              | 1                                                                              | 12497   | 51008          | activating signal cointegrator 1 complex subunit 1                  | Transcription regulator activity     | Nucleus              | Transcription regulatory protein    | Regulation of nucleobase, nucleoside, nucleotide and nucleic acid metabolism | KH                          | Yes                      |
| ENO2        | 2026    | gamma-enolase                                                                        | NP_001966.1       | 1          | 6                 | 8          | 53     | 1.02                                                     | 1.29                                                     | 7.96                                                                                   | 6.06                                                                                   | 26                                                                                            | 25.1                                                                                          | 10                                                                             | 10                                                                             | 573     | 2026           | enolase 2 (gamma neuronal)                                          | Catalytic activity                   | Cytoplasm            | Enzyme: Hydratase                   | Metabolism;Energy pathways                                                   | -                           | Yes                      |
| PSMC6       | 5706    | 26S protease regulatory subunit 10B                                                  | NP_002797.3       | 1          | 16                | 16         | 66     | 1.02                                                     | 1.26                                                     | 4.35                                                                                   | 4.3                                                                                    | 26.7                                                                                          | 32.8                                                                                          | 35                                                                             | 35                                                                             | 4086    | 5706           | proteasome (prosome, macropain) 26S subunit, ATPase, 6              | Ubiquitin-specific protease activity | Cytoplasm            | Ubiquitin proteasome system protein | Protein metabolism                                                           | AAA;CC                      | Yes                      |
| CTR9        | 9646    | RNA polymerase-associated protein CTR9 homolog                                       | NP_055448.1       | 1          | 3                 | 3          | 5      | 1.02                                                     | 1.26                                                     | 1.27                                                                                   | 0.72                                                                                   | 2.2                                                                                           | 1.6                                                                                           | 3                                                                              | 3                                                                              | 6717    | 9646           | SH2 domain binding protein 1 (tetra-tri-cysteine repeat containing) | Transcription regulator activity     | Nucleus              | Transcription regulatory protein    | Regulation of nucleobase, nucleoside, nucleotide and nucleic acid metabolism | TPR;CC                      | No                       |
| TNPO1       | 3842    | transportin-1 isoform 1                                                              | NP_002261.3       | 2          | 18                | 22         | 80     | 1.02                                                     | 1.25                                                     | 6.08                                                                                   | 5.66                                                                                   | 36.8                                                                                          | 42.4                                                                                          | 33                                                                             | 33                                                                             | 4210    | 3842           | transportin 1                                                       | Transporter activity                 | Cytoplasm            | Transport/cargo protein             | Transport                                                                    | IBN_NT;ARM;H EAT            | Yes                      |
| PSMD13      | 5719    | 26S proteasome non-ATPase regulatory subunit 13 isoform 1                            | NP_002808.3       | 2          | 20                | 20         | 85     | 1.02                                                     | 1.24                                                     | 3.21                                                                                   | 3.5                                                                                    | 21.9                                                                                          | 29.3                                                                                          | 44                                                                             | 44                                                                             | 4595    | 5719           | proteasome (prosome, macropain) 26S subunit, non-ATPase, 13         | Ubiquitin-specific protease activity | Cytoplasm            | Ubiquitin proteasome system protein | Protein metabolism                                                           | PCI                         | Yes                      |
| ATXN2L      | 11273   | ataxin-2-like protein isoform C                                                      | NP_680780.1       | 7          | 14                | 15         | 24     | 1.02                                                     | 1.22                                                     | 3.75                                                                                   | 2.13                                                                                   | 15.8                                                                                          | 10.8                                                                                          | 17                                                                             | 17                                                                             | 6394    | 11273          | ataxin 2-like                                                       | Molecular function unknown           | Nucleus;Cytoplasm    | Unclassified                        | Biological process unknown                                                   | -                           | Yes                      |
| SYS1        | 90196   | protein SYS1 homolog isoform a                                                       | NP_291020.1       | 1          | 1                 | 1          | 1      | 1.02                                                     | 1.22                                                     |                                                                                        |                                                                                        |                                                                                               |                                                                                               | 1                                                                              | 1                                                                              |         |                |                                                                     |                                      |                      |                                     |                                                                              |                             |                          |
| CHM         | 1121    | rab proteins geranylgeranyltransferase component A 1 isoform a                       | NP_000381.1       | 1          | 1                 | 1          | 1      | 1.02                                                     | 1.21                                                     |                                                                                        |                                                                                        |                                                                                               |                                                                                               | 1                                                                              | 1                                                                              | 2312    | 1121           | choroderemia (Rab escort protein 1)                                 | Transaminase activity                | Cytoplasm            | Enzyme: Prenyltransferase           | Metabolism;Energy pathways                                                   | -                           | Yes                      |
| KIF3A       | 11127   | kinesin-like protein KIF3A isoform 1                                                 | NP_001287720.1    | 6          | 6                 | 8          | 15     | 1.02                                                     | 1.21                                                     | 5.29                                                                                   | 8.99                                                                                   | 12.1                                                                                          | 24.7                                                                                          | 5                                                                              | 5                                                                              | 5250    | 11127          | kinesin family member 3A                                            | Motor activity                       | Cytoplasm            | Motor protein                       | Cell growth and/or maintenance                                               | KIS;CC                      | Yes                      |
| TARDBP      | 23435   | TAR DNA-binding protein 43                                                           | NP_031401.1       | 1          | 6                 | 6          | 29     | 1.02                                                     | 1.2                                                      | 1.89                                                                                   | 5.67                                                                                   | 7.2                                                                                           | 25.8                                                                                          | 14                                                                             | 14                                                                             | 5466    | 23435          | TAR DNA binding protein                                             | DNA binding                          | Nucleus              | DNA binding protein                 | Regulation of nucleobase, nucleoside, nucleotide and nucleic acid metabolism | RRM                         | Yes                      |
| SNRPD2      | 6633    | small nuclear ribonucleoprotein Sm D2 isoform 1                                      | NP_004588.1       | 2          | 9                 | 9          | 35     | 1.02                                                     | 1.19                                                     | 13.59                                                                                  | 8.05                                                                                   | 60                                                                                            | 39.7                                                                                          | 16                                                                             | 16                                                                             | 3038    | 6633           | small nuclear ribonucleoprotein D2 polypeptide16.5kDa               | RNA binding                          | Nucleus              | RNA binding protein                 | Regulation of nucleobase, nucleoside, nucleotide and nucleic acid metabolism | SM                          | Yes                      |
| MRPS30      | 10884   | 28S ribosomal protein S30, mitochondrial                                             | NP_057724.2       | 1          | 2                 | 2          | 11     | 1.02                                                     | 1.19                                                     | 10.04                                                                                  | 12.31                                                                                  | 25.6                                                                                          | 33.6                                                                                          | 6                                                                              | 5                                                                              | 17597   | 10884          | mitochondrial ribosomal protein S30                                 | Structural molecule activity         | Mitochondrion        | Structural protein                  | Protein metabolism                                                           | -                           | Yes                      |
| YEATS4      | 8089    | YEATS domain-containing protein 4 isoform 1                                          | NP_006521.1       | 2          | 1                 | 1          | 1      | 1.02                                                     | 1.19                                                     |                                                                                        |                                                                                        |                                                                                               |                                                                                               | 1                                                                              | 1                                                                              | 3666    | 8089           | YEATS domain containing 4                                           | Transcription factor activity        | Nucleus              | Transcription factor                | Regulation of nucleobase, nucleoside, nucleotide and nucleic acid metabolism | CC                          | Yes                      |
| ANKRD17     | 26057   | ankyrin repeat domain-containing protein 17 isoform a                                | NP_115593.3       | 3          | 7                 | 14         | 39     | 1.02                                                     | 1.18                                                     | 6.57                                                                                   | 4.9                                                                                    | 16.5                                                                                          | 14.2                                                                                          | 6                                                                              | 6                                                                              | 10648   | 26057          | ankyrin repeat domain 17                                            | Molecular function unknown           | Nucleus              | Unclassified                        | Biological process unknown                                                   | CC;ANK;KH                   | Yes                      |
| ABCB1       | 5243    | multidrug resistance protein 1                                                       | NP_000918.2       | 1          | 1                 | 1          | 1      | 1.02                                                     | 1.18                                                     |                                                                                        |                                                                                        |                                                                                               |                                                                                               | 1                                                                              | 1                                                                              | 1370    | 5243           | ATP-binding cassette, sub-family B (MDR/TAP), member 1              | Transporter activity                 | Plasma membrane      | Transport/cargo protein             | Transport                                                                    | TM;AAA;CC                   | Yes                      |
| PPP5K2      | 23262   | inositol hexakisphosphate and diphosphoinositol-pentakisphosphate kinase 2 isoform 3 | NP_001268400.1    | 3          | 3                 | 4          | 11     | 1.02                                                     | 1.18                                                     | 19.56                                                                                  | 11.38                                                                                  | 41.6                                                                                          | 27.4                                                                                          | 4                                                                              | 4                                                                              | 13802   | 23262          | None                                                                | Molecular function unknown           | -                    | Unclassified                        | Biological process unknown                                                   | -                           | No                       |
| DPYSL3      | 1809    | dihydropyrimidinase-related protein 3 isoform 1                                      | NP_001184223.1    | 2          | 14                | 17         | 45     | 1.02                                                     | 1.17                                                     | 6.72                                                                                   | 2.43                                                                                   | 28.1                                                                                          | 11.4                                                                                          | 16                                                                             | 16                                                                             | 3104    | 1809           | dihydropyrimidinase-like 3                                          | Hydrolase activity                   | Cytoplasm            | Enzyme: Hydrolase                   | Metabolism;Energy pathways                                                   | -                           | Yes                      |
| THUMP1      | 55623   | THUMP domain-containing protein 1                                                    | NP_060206.2       | 1          | 7                 | 7          | 19     | 1.02                                                     | 1.17                                                     | 3.54                                                                                   | 4.22                                                                                   | 10.2                                                                                          | 14                                                                                            | 8                                                                              | 8                                                                              | 8619    | 55623          | THUMP domain containing 1                                           | Molecular function unknown           | Cytoplasm            | Unclassified                        | Biological process unknown                                                   | -                           | Yes                      |
| DDX3X       | 1654    | ATP-dependent RNA helicase DDX3X isoform 1                                           | NP_001347.3       | 5          | 21                | 24         | 73     | 1.02                                                     | 1.16                                                     | 3.96                                                                                   | 3.35                                                                                   | 22.9                                                                                          | 21.8                                                                                          | 31                                                                             | 31                                                                             | 2154    | 1654           | DEAD (Asp-Glu-Ala-Asp) box polypeptide 3, X-linked                  | RNA binding                          | Nucleus              | RNA helicase                        | Regulation of nucleobase, nucleoside, nucleotide and nucleic acid metabolism | DEXD;HELIC                  | Yes                      |
| RBM10       | 8241    | RNA-binding protein 10 isoform 5                                                     | NP_001191397.1    | 5          | 11                | 12         | 21     | 1.02                                                     | 1.16                                                     | 6.18                                                                                   | 3.44                                                                                   | 20.2                                                                                          | 12.7                                                                                          | 10                                                                             | 10                                                                             | 2095    | 8241           | RNA binding motif protein 10                                        | RNA binding                          | Nucleus              | RNA binding protein                 | Regulation of nucleobase, nucleoside, nucleotide and nucleic acid metabolism | RRM;ZnF;RBZ;G_PATCH;CC;ZNF2 | Yes                      |
| TMEM41A     | 90407   | transmembrane protein 41A precursor                                                  | NP_542383.1       | 1          | 2                 | 2          | 4      | 1.02                                                     | 1.16                                                     | 0.23                                                                                   | 5.08                                                                                   | 0.4                                                                                           | 10.2                                                                                          | 3                                                                              | 3                                                                              | 15539   | 90407          | transmembrane protein 41A                                           | Molecular function unknown           | Integral to membrane | Integral membrane protein           | Biological process unknown                                                   | TM;SP                       | No                       |
| SRRT        | 51593   | serrate RNA effector molecule homolog isoform a                                      | NP_056992.4       | 4          | 19                | 19         | 58     | 1.02                                                     | 1.15                                                     | 3.64                                                                                   | 2.6                                                                                    | 19.9                                                                                          | 15.9                                                                                          | 28                                                                             | 28                                                                             | 10665   | 51593          | None                                                                | Molecular function unknown           | Nucleus              | Unclassified                        | Biological process unknown                                                   | CC;RRM                      | Yes                      |
| DNAAF2      | 55172   | protein kintoun isoform 1                                                            | NP_060609.2       | 2          | 1                 | 1          | 2      | 1.02                                                     | 1.14                                                     |                                                                                        |                                                                                        |                                                                                               |                                                                                               | 1                                                                              | 1                                                                              |         |                |                                                                     |                                      |                      |                                     |                                                                              |                             |                          |
| SMAD5       | 4090    | mothers against decapentaplegic homolog 5                                            | NP_005894.3       | 2          | 2                 | 3          | 6      | 1.02                                                     | 1.13                                                     | 16.95                                                                                  | 38.26                                                                                  | 24.7                                                                                          | 67.1                                                                                          | 2                                                                              | 2                                                                              | 4381    | 4090           | SMAD, mothers against DPP homolog 5 (Drosophila)                    | Transcription regulator activity     | Nucleus              | Transcription regulatory protein    | Regulation of nucleobase, nucleoside, nucleotide and nucleic acid metabolism | MH2;MH1;CC                  | No                       |
| LLPH        | 84298   | protein LLP homolog                                                                  | NP_115714.1       | 1          | 1                 | 1          | 4      | 1.02                                                     | 1.13                                                     | 7.07                                                                                   | 7.34                                                                                   | 10.2                                                                                          | 11.8                                                                                          | 2                                                                              | 2                                                                              | 11308   | 84298          | None                                                                | Molecular function unknown           | -                    | Unclassified                        | Biological process unknown                                                   | -                           | No                       |
| RAB6A       | 5870    | ras-related protein Rab-6A isoform a                                                 | NP_002860.2       | 15         | 1                 | 10         | 79     | 1.02                                                     | 1.13                                                     | 13.19                                                                                  | 14.73                                                                                  | 19.1                                                                                          | 24                                                                                            | 2                                                                              | 2                                                                              | 1543    | 5870           | RAB6A, member RAS oncogene family                                   | GTPase activity                      | Golgi apparatus      | GTPase                              | Cell communication;Signal transduction                                       | RAB                         | No                       |

Supplementary Table S1. List of quantified proteins in OKF6/TERT1-Smoke cells  
 Raigopaln et al., 2017. Role of protein kinase N2 (PKN2) in cigarette smoke-mediated oncogenic transformation of oral cells

| Gene Symbol | Gene ID | Protein Description                                                               | Protein Accession | # Proteins | # Unique Peptides | # Peptides | # PSMs | OKF6/TERT1-Smoke/<br>OKF6/TERT1-Parental<br>(130/126) R1 | OKF6/TERT1-Smoke/<br>OKF6/TERT1-Parental<br>(128/127) R2 | Ratio Standard Errors [%]:<br>OKF6/TERT1-Smoke/<br>OKF6/TERT1-Parental<br>(130/126) R1 | Ratio Standard Errors [%]:<br>OKF6/TERT1-Smoke/<br>OKF6/TERT1-Parental<br>(128/127) R2 | Ratio Variabilities [%]:<br>F13: OKF6/TERT1-<br>Smoke/<br>OKF6/TERT1-Parental<br>(130/126) R1 | Ratio Variabilities [%]:<br>F13: OKF6/TERT1-<br>Smoke/<br>OKF6/TERT1-Parental<br>(128/127) R2 | Ratio Counts: F13:<br>OKF6/TERT1-Smoke/<br>OKF6/TERT1-Parental<br>(130/126) R1 | Ratio Counts: F13:<br>OKF6/TERT1-Smoke/<br>OKF6/TERT1-Parental<br>(128/127) R2 | HPRD ID | Entrez Gene ID | Gene Name                                                                | Molecular Function                                    | Primary Localization                  | Molecular Class                                     | Biological Process                                                      | Domains            | Plasma Proteome Database |
|-------------|---------|-----------------------------------------------------------------------------------|-------------------|------------|-------------------|------------|--------|----------------------------------------------------------|----------------------------------------------------------|----------------------------------------------------------------------------------------|----------------------------------------------------------------------------------------|-----------------------------------------------------------------------------------------------|-----------------------------------------------------------------------------------------------|--------------------------------------------------------------------------------|--------------------------------------------------------------------------------|---------|----------------|--------------------------------------------------------------------------|-------------------------------------------------------|---------------------------------------|-----------------------------------------------------|-------------------------------------------------------------------------|--------------------|--------------------------|
| KIF21A      | 55605   | kinesin-like protein KIF21A isoform 1                                             | NP_001166935.1    | 9          | 3                 | 4          | 9      | 1.02                                                     | 1.12                                                     | 3.85                                                                                   | 5.24                                                                                   | 5.6                                                                                           | 8.3                                                                                           | 2                                                                              | 2                                                                              | 10506   | 55605          | kinesin family member 21A                                                | Motor activity                                        | Cytoplasm;Nucleus                     | Motor protein                                       | Cell growth and/or maintenance                                          | WD40,CC,KISC       | Yes                      |
| EXOSC4      | 54512   | exosome complex component RRP41                                                   | NP_061910.1       | 1          | 2                 | 2          | 4      | 1.02                                                     | 1.12                                                     | 7.66                                                                                   | 14.18                                                                                  | 11.1                                                                                          | 22.7                                                                                          | 2                                                                              | 2                                                                              | 16221   | 54512          | exosome component 4                                                      | Ribonuclease activity                                 | Nucleolus                             | Ribonuclease                                        | Regulation of nucleobase, nucleotide and nucleic acid metabolism        | -                  | Yes                      |
| FLAD1       | 80308   | FAD synthase isoform 1                                                            | NP_079483.3       | 4          | 5                 | 5          | 8      | 1.02                                                     | 1.1                                                      | 1.69                                                                                   | 12.5                                                                                   | 3.8                                                                                           | 31.5                                                                                          | 5                                                                              | 5                                                                              | 17887   | 80308          | None                                                                     | Molecular function unknown                            | -                                     | Unclassified                                        | Biological process unknown                                              | -                  | No                       |
| GIPC1       | 10755   | PDZ domain-containing protein GIPC1 isoform 1                                     | NP_005707.1       | 2          | 3                 | 3          | 5      | 1.02                                                     | 1.09                                                     | 15.81                                                                                  | 6.02                                                                                   | 28.5                                                                                          | 11.4                                                                                          | 3                                                                              | 3                                                                              | 5462    | 10755          | regulator of G-protein signalling 19 interacting protein 1               | Binding                                               | Cytoplasm                             | Unclassified                                        | Signal transduction                                                     | PDZ                | Yes                      |
| UHRF1       | 29128   | E3 ubiquitin-protein ligase UHRF1 isoform 2                                       | NP_037414.3       | 2          | 1                 | 1          | 2      | 1.02                                                     | 1.09                                                     |                                                                                        |                                                                                        |                                                                                               |                                                                                               | 1                                                                              | 1                                                                              | 6992    | 29128          | ubiquitin-like, containing PHD and RING finger domains, 1                | DNA binding                                           | Nucleus                               | DNA binding protein                                 | Regulation of nucleobase, nucleotide and nucleic acid metabolism        | UBQLN,LSRING,PHDLZ | No                       |
| RPN1        | 6184    | dolichyl-diphosphooligonucleotide-protein glycosyltransferase subunit 1 precursor | NP_002941.1       | 1          | 38                | 38         | 135    | 1.02                                                     | 1.09                                                     | 3.79                                                                                   | 2.93                                                                                   | 33.7                                                                                          | 27.6                                                                                          | 72                                                                             | 72                                                                             | 1598    | 6184           | ribophorin 1                                                             | Ubiquitin-specific protease activity                  | Endoplasmic reticulum;Nucleus;Cytosol | Ubiquitin proteasome system protein                 | Protein metabolism                                                      | SP,CC,TM           | Yes                      |
| RAD21       | 5885    | double-strand-break repair protein rad21 homolog                                  | NP_006256.1       | 2          | 8                 | 8          | 16     | 1.02                                                     | 1.08                                                     | 13.25                                                                                  | 3.95                                                                                   | 39.8                                                                                          | 11.3                                                                                          | 8                                                                              | 7                                                                              | 5924    | 5885           | RAD21 homolog (S. pombe)                                                 | DNA binding                                           | Nucleus                               | DNA binding protein                                 | Regulation of nucleobase, nucleotide and nucleic acid metabolism        | -                  | Yes                      |
| MRM1        | 79922   | rRNA methyltransferase 1, mitochondrial precursor                                 | NP_079140.2       | 1          | 1                 | 1          | 2      | 1.02                                                     | 1.08                                                     |                                                                                        |                                                                                        |                                                                                               |                                                                                               | 1                                                                              | 1                                                                              | 8656    | 79922          | None                                                                     | Methyltransferase activity                            | -                                     | RNA methyltransferase                               | Biological process unknown                                              | -                  | No                       |
| COG3        | 83548   | conserved oligomeric Golgi complex subunit 3                                      | NP_113619.2       | 1          | 7                 | 7          | 13     | 1.02                                                     | 1.07                                                     | 17.13                                                                                  | 9.41                                                                                   | 48.7                                                                                          | 27.2                                                                                          | 7                                                                              | 7                                                                              | 8443    | 83548          | component of oligomeric golgi complex 3                                  | Transporter activity                                  | Golgi apparatus                       | Transport/cargo protein                             | Transport                                                               | CC,LZ              | Yes                      |
| RPA1        | 6117    | replication protein A 70 kDa DNA-binding subunit                                  | NP_002936.1       | 1          | 13                | 13         | 29     | 1.02                                                     | 1.06                                                     | 2.85                                                                                   | 4.99                                                                                   | 12                                                                                            | 22.1                                                                                          | 17                                                                             | 17                                                                             | 1565    | 6117           | replication protein A1, 70kDa                                            | DNA binding                                           | Nucleus                               | DNA binding protein                                 | Regulation of nucleobase, nucleotide and nucleic acid metabolism        | TRNA               | Yes                      |
| GLMN        | 11146   | glomalin                                                                          | NP_444504.1       | 1          | 5                 | 5          | 8      | 1.02                                                     | 1.06                                                     | 12.51                                                                                  | 0.42                                                                                   | 29.2                                                                                          | 1                                                                                             | 5                                                                              | 5                                                                              | 3451    | 11146          | glomulin, FKBP associated protein                                        | Receptor binding;Protein domain specific binding      | Cytoplasm                             | Unclassified;Ligand                                 | Cell communication;Signal transduction;Regulation of cell proliferation | -                  | Yes                      |
| ZNF1        | 57169   | NFX1-type zinc finger-containing protein 1                                        | NP_066363.1       | 1          | 6                 | 6          | 8      | 1.02                                                     | 1.05                                                     | 0.09                                                                                   | 3.67                                                                                   | 0.2                                                                                           | 7.7                                                                                           | 4                                                                              | 4                                                                              | 11142   | 57169          | None                                                                     | Transcription regulator activity                      | Nucleus                               | Transcription regulatory protein                    | Regulation of nucleobase, nucleotide and nucleic acid metabolism        | CC                 | Yes                      |
| UFSP2       | 55325   | ufm1-specific protease 2                                                          | NP_060829.2       | 1          | 2                 | 2          | 6      | 1.02                                                     | 1.05                                                     | 0.29                                                                                   | 0.98                                                                                   | 0.5                                                                                           | 1.8                                                                                           | 3                                                                              | 3                                                                              | 7741    | 55325          | None                                                                     | Peptidase activity                                    | -                                     | Protease                                            | Protein metabolism                                                      | -                  | Yes                      |
| CLPX        | 10845   | ATP-dependent Clp protease ATP-binding subunit clpX-like, mitochondrial precursor | NP_006651.2       | 1          | 12                | 12         | 32     | 1.02                                                     | 1.04                                                     | 3.09                                                                                   | 5.49                                                                                   | 11.4                                                                                          | 20.9                                                                                          | 13                                                                             | 13                                                                             | 7478    | 10845          | ClpX caseinolytic protease X homolog (E. coli)                           | Peptidase activity                                    | Mitochondrion                         | Protease                                            | Protein metabolism                                                      | AAA,SP             | Yes                      |
| MRPL15      | 29088   | 39S ribosomal protein L15, mitochondrial                                          | NP_054894.1       | 1          | 7                 | 7          | 18     | 1.02                                                     | 1.03                                                     | 8.74                                                                                   | 5.13                                                                                   | 28.8                                                                                          | 16.9                                                                                          | 10                                                                             | 10                                                                             | 14742   | 29088          | mitochondrial ribosomal protein L15                                      | Structural constituent of ribosome                    | Mitochondrion                         | Ribosomal subunit                                   | Protein metabolism                                                      | SP                 | No                       |
| LNPEP       | 4012    | leucyl-cystinyl aminopeptidase isoform 1                                          | NP_005566.2       | 2          | 11                | 11         | 21     | 1.02                                                     | 1.03                                                     | 2.13                                                                                   | 13.58                                                                                  | 7.6                                                                                           | 51.2                                                                                          | 12                                                                             | 12                                                                             | 1041    | 4012           | leucyl(cystinyl) aminopeptidase 1                                        | Aminopeptidase activity                               | Plasma membrane                       | Aminopeptidase                                      | Protein metabolism                                                      | TM                 | Yes                      |
| CLCC1       | 23155   | chloride channel CLIC-like protein 1 isoform 1 precursor                          | NP_001041675.1    | 4          | 2                 | 2          | 4      | 1.02                                                     | 1.02                                                     | 2.27                                                                                   | 1.89                                                                                   | 3.3                                                                                           | 2.7                                                                                           | 2                                                                              | 2                                                                              | 17471   | 23155          | None                                                                     | Ion channel activity                                  | Endoplasmic reticulum                 | Ion channel                                         | Transport                                                               | TM,SP              | No                       |
| SMCHD1      | 23347   | structural maintenance of chromosomes flexible hinge domain-containing protein 1  | NP_056110.2       | 1          | 8                 | 8          | 12     | 1.02                                                     | 1.02                                                     | 6.75                                                                                   | 4.65                                                                                   | 16.9                                                                                          | 11.6                                                                                          | 6                                                                              | 6                                                                              | 19413   | 23347          | structural maintenance of chromosomes flexible hinge domain containing 1 | Molecular function unknown                            | -                                     | Unclassified                                        | Biological process unknown                                              | CC                 | No                       |
| EIF4G1      | 1981    | eukaryotic translation initiation factor 4 gamma 1 isoform 6                      | NP_001181875.1    | 7          | 37                | 41         | 160    | 1.02                                                     | 1.02                                                     | 2.66                                                                                   | 3.23                                                                                   | 21.1                                                                                          | 26                                                                                            | 59                                                                             | 60                                                                             | 6774    | 1981           | eukaryotic translation initiation factor 4gamma, 1                       | Translation regulator activity                        | Nucleus;Cytoplasm                     | Translation regulatory protein                      | Protein metabolism                                                      | CC,MIF4G,NLS,MA3   | Yes                      |
| XRN2        | 22803   | 5'-3' exonuclease 2                                                               | NP_036387.2       | 1          | 17                | 17         | 38     | 1.02                                                     | 1.02                                                     | 6.27                                                                                   | 3.67                                                                                   | 30.6                                                                                          | 17.7                                                                                          | 22                                                                             | 22                                                                             | 10309   | 22803          | 5'-3' exonuclease 2                                                      | Ribonuclease activity                                 | Nucleolus;Nucleus;Cytoplasm           | Ribonuclease                                        | Regulation of nucleobase, nucleotide and nucleic acid metabolism        | ZnF,C2HC           | Yes                      |
| STAM2       | 10254   | signal transducing adapter molecule 2                                             | NP_005834.4       | 1          | 2                 | 2          | 10     | 1.02                                                     | 1.02                                                     | 4.18                                                                                   | 3.48                                                                                   | 9.6                                                                                           | 7.9                                                                                           | 5                                                                              | 5                                                                              | 5876    | 10254          | signal transducing adaptor molecule (SH3 domain and ITAM motif) 2        | Receptor signaling complex scaffold activity          | Cytoplasm                             | Adapter molecule                                    | Cell communication;Signal transduction                                  | VHS,UM,SH3,ITAM,CC | No                       |
| STK24       | 8428    | serine/threonine-protein kinase 24 isoform a precursor                            | NP_003567.2       | 3          | 9                 | 14         | 38     | 1.02                                                     | 1.01                                                     | 8.38                                                                                   | 11.85                                                                                  | 29.1                                                                                          | 41.1                                                                                          | 11                                                                             | 11                                                                             | 10385   | 8428           | serine/threonine kinase 24 (STE20 homolog,yeast)                         | Protein serine/threonine kinase activity              | Cytoplasm;Nucleus                     | Serine/threonine kinase                             | Signal transduction                                                     | S,T_kinase;CC;NLS  | Yes                      |
| KDM3B       | 51780   | lysine-specific demethylase 3B                                                    | NP_057688.2       | 1          | 8                 | 8          | 17     | 1.02                                                     | 1                                                        | 7.03                                                                                   | 8.65                                                                                   | 20.5                                                                                          | 23.1                                                                                          | 8                                                                              | 7                                                                              | 11055   | 51780          | jumonjin domain containing 1B                                            | Molecular function unknown                            | Nucleus                               | Unclassified                                        | Biological process unknown                                              | JMJC               | Yes                      |
| KDM1A       | 23028   | lysine-specific histone demethylase 1A isoform a                                  | NP_001009999.1    | 2          | 8                 | 8          | 19     | 1.02                                                     | 1                                                        | 2.71                                                                                   | 9.95                                                                                   | 9.6                                                                                           | 35.6                                                                                          | 12                                                                             | 12                                                                             | 9800    | 23028          | amine oxidase (flavin containing) domain 2                               | Transcription regulator activity;Deacetylase activity | Nucleus;Cytoplasm                     | Enzyme;Deacetylase;Transcription regulatory protein | Regulation of nucleobase, nucleotide and nucleic acid metabolism        | CC                 | Yes                      |
| C12orf29    | 91298   | uncharacterized protein C12orf29                                                  | NP_001009894.2    | 1          | 1                 | 1          | 2      | 1.02                                                     | 1                                                        |                                                                                        |                                                                                        |                                                                                               |                                                                                               | 1                                                                              | 1                                                                              | 13199   | 91298          | None                                                                     | Molecular function unknown                            | -                                     | Unclassified                                        | Biological process unknown                                              | -                  | No                       |



Supplementary Table S1. List of quantified proteins in OKF6/TERT1-Smoke cells  
 Raingonalan et al., 2017. Role of protein kinase N2 (PKN2) in cigarette smoke-mediated oncogenic transformation of oral cells

| Gene Symbol | Gene ID | Protein Description                                                             | Protein Accession | # Proteins | # Unique Peptides | # Peptides | # PSMs | OKF6/TERT1-Smoke/<br>OKF6/TERT1-Parental<br>(130/126) R1 | OKF6/TERT1-Smoke/<br>OKF6/TERT1-Parental<br>(128/127) R2 | Ratio Standard Errors [%]:<br>OKF6/TERT1-Smoke/<br>OKF6/TERT1-Parental<br>(130/126) R1 | Ratio Standard Errors [%]:<br>OKF6/TERT1-Smoke/<br>OKF6/TERT1-Parental<br>(128/127) R2 | Ratio Variabilities [%]:<br>F13: OKF6/TERT1-<br>Smoke/<br>OKF6/TERT1-Parental<br>(130/126) R1 | Ratio Variabilities [%]:<br>F13: OKF6/TERT1-<br>Smoke/<br>OKF6/TERT1-Parental<br>(128/127) R2 | Ratio Counts: F13:<br>OKF6/TERT1-Smoke/<br>OKF6/TERT1-Parental<br>(130/126) R1 | Ratio Counts: F13:<br>OKF6/TERT1-Smoke/<br>OKF6/TERT1-Parental<br>(128/127) R2 | HPRD ID | Entrez Gene ID | Gene Name                                                                             | Molecular Function                           | Primary Localization  | Molecular Class                     | Biological Process                                                           | Domains              | Plasma Proteome Database |
|-------------|---------|---------------------------------------------------------------------------------|-------------------|------------|-------------------|------------|--------|----------------------------------------------------------|----------------------------------------------------------|----------------------------------------------------------------------------------------|----------------------------------------------------------------------------------------|-----------------------------------------------------------------------------------------------|-----------------------------------------------------------------------------------------------|--------------------------------------------------------------------------------|--------------------------------------------------------------------------------|---------|----------------|---------------------------------------------------------------------------------------|----------------------------------------------|-----------------------|-------------------------------------|------------------------------------------------------------------------------|----------------------|--------------------------|
| YWHAH       | 7533    | 14-3-3 protein eta                                                              | NP_003396.1       | 1          | 12                | 15         | 110    | 1.02                                                     | 0.83                                                     | 7.07                                                                                   | 11.75                                                                                  | 37.3                                                                                          | 51.5                                                                                          | 25                                                                             | 25                                                                             | 215     | 7533           | tyrosine 3-monooxygenase/tyrophan-5-monooxygenase activation protein, eta polypeptide | Receptor signaling complex scaffold activity | Cytoplasm             | Adapter molecule                    | Cell communication, Signal transduction                                      | -                    | Yes                      |
| DSC2        | 1824    | desmocollin-2 isoform Dsc2a preprotein                                          | NP_077740.1       | 2          | 3                 | 3          | 6      | 1.02                                                     | 0.8                                                      | 19.94                                                                                  | 13.44                                                                                  | 42.3                                                                                          | 21.7                                                                                          | 4                                                                              | 4                                                                              | 512     | 1824           | desmocollin 2                                                                         | Cell adhesion molecule activity              | Plasma membrane       | Adhesion molecule                   | Cell growth and/or maintenance                                               | SP, Cadherin, TM     | Yes                      |
| CARS2       | 79587   | probable cysteine-tRNA ligase, mitochondrial                                    | NP_078813.1       | 1          | 9                 | 9          | 19     | 1.02                                                     | 0.79                                                     | 4.96                                                                                   | 6.14                                                                                   | 16                                                                                            | 15.5                                                                                          | 10                                                                             | 10                                                                             | 7763    | 79587          | None                                                                                  | Ligase activity                              | Mitochondrion         | Enzyme; Ligase                      | Metabolism                                                                   | -                    | Yes                      |
| RBM34       | 23029   | RNA-binding protein 34 isoform 1                                                | NP_055829.2       | 2          | 2                 | 2          | 4      | 1.02                                                     | 0.79                                                     | 5.74                                                                                   | 15.39                                                                                  | 8.3                                                                                           | 17.4                                                                                          | 2                                                                              | 2                                                                              | 11065   | 23029          | RNA binding motif protein 34                                                          | RNA binding                                  | Nucleolus             | RNA binding protein                 | Regulation of nucleobase, nucleoside and nucleic acid metabolism             | RRM, CC              | Yes                      |
| DERL1       | 79139   | derlin-1 isoform a                                                              | NP_077271.1       | 2          | 1                 | 1          | 2      | 1.02                                                     | 0.79                                                     |                                                                                        |                                                                                        |                                                                                               |                                                                                               | 1                                                                              | 1                                                                              | 12302   | 79139          | Der1-like domain family, member 1                                                     | Transporter activity                         | Endoplasmic reticulum | Transport/cargo protein             | Transport                                                                    | TM                   | Yes                      |
| KIF2C       | 11004   | kinesin-like protein KIF2C isoform 1                                            | NP_006836.2       | 4          | 2                 | 4          | 6      | 1.02                                                     | 0.78                                                     |                                                                                        |                                                                                        |                                                                                               |                                                                                               | 1                                                                              | 1                                                                              | 5172    | 11004          | kinesin family member 2C                                                              | Motor activity                               | Cytoplasm             | Motor protein                       | Cell growth and/or maintenance                                               | CC, NLS              | Yes                      |
| LEMD3       | 23592   | inner nuclear membrane protein Lemd3 isoform 1                                  | NP_055134.2       | 2          | 10                | 10         | 19     | 1.02                                                     | 0.77                                                     | 6.54                                                                                   | 14.68                                                                                  | 22.3                                                                                          | 38.7                                                                                          | 11                                                                             | 11                                                                             | 9704    | 23592          | LEM domain containing 3                                                               | Nucleotide binding                           | Nucleus               | Integral membrane protein           | Immune response                                                              | TM                   | Yes                      |
| YIPF6       | 286451  | protein YIPF6 isoform A                                                         | NP_776195.2       | 1          | 1                 | 1          | 2      | 1.02                                                     | 0.77                                                     |                                                                                        |                                                                                        |                                                                                               |                                                                                               | 1                                                                              | 1                                                                              | 6639    | 286451         | None                                                                                  | Molecular function unknown                   | -                     | Unclassified                        | Biological process unknown                                                   | TM                   | No                       |
| PCNP        | 57092   | PEST proteolytic signal-containing nuclear protein                              | NP_065090.1       | 1          | 4                 | 4          | 7      | 1.02                                                     | 0.76                                                     | 8.46                                                                                   | 42.19                                                                                  | 19.5                                                                                          | 81.6                                                                                          | 5                                                                              | 5                                                                              | 17826   | 57092          | None                                                                                  | Ubiquitin-specific protease activity         | Nucleus               | Ubiquitin proteasome system protein | Protein metabolism                                                           | -                    | No                       |
| BRCC3       | 79184   | lys-63-specific deubiquitinase BRCC36 isoform 3                                 | NP_001229569.1    | 3          | 3                 | 3          | 4      | 1.02                                                     | 0.74                                                     |                                                                                        |                                                                                        |                                                                                               |                                                                                               | 1                                                                              | 1                                                                              | 6465    | 79184          | chromosome X open reading frame 53                                                    | Ligase activity                              | -                     | Ubiquitin proteasome system protein | Protein metabolism                                                           | JAB, CC              | Yes                      |
| EIF3H       | 8667    | eukaryotic translation initiation factor 3 subunit H                            | NP_003747.1       | 1          | 12                | 12         | 33     | 1.02                                                     | 0.73                                                     | 3.02                                                                                   | 11.18                                                                                  | 12.4                                                                                          | 33.7                                                                                          | 16                                                                             | 16                                                                             | 4885    | 8667           | eukaryotic translation initiation factor 3, subunit 3, gamma, 40kDa                   | Translation regulator activity               | Cytoplasm             | Translation regulatory protein      | Protein metabolism, Translation                                              | JAB                  | Yes                      |
| AKAP9       | 10142   | A-kinase anchor protein 9 isoform 2                                             | NP_005742.4       | 2          | 5                 | 5          | 9      | 1.02                                                     | 0.7                                                      | 12.63                                                                                  | 7.84                                                                                   | 22.6                                                                                          | 9.6                                                                                           | 3                                                                              | 3                                                                              | 4921    | 10142          | A kinase (PKA) anchor protein (otiao) 9                                               | Receptor signaling complex scaffold activity | Centrosome            | Adapter molecule                    | Cell communication, Signal transduction                                      | CC                   | Yes                      |
| PLEKH02     | 80301   | pleckstrin homology domain-containing family O member 2 isoform 1               | NP_079477.2       | 2          | 4                 | 4          | 12     | 1.02                                                     | 0.69                                                     | 12.43                                                                                  | 10.22                                                                                  | 31.8                                                                                          | 17.4                                                                                          | 6                                                                              | 6                                                                              | 15910   | 80301          | None                                                                                  | Molecular function unknown                   | -                     | Unclassified                        | Biological process unknown                                                   | PH                   | No                       |
| TFG         | 10342   | protein TFG isoform 1                                                           | NP_006061.2       | 2          | 7                 | 7          | 31     | 1.02                                                     | 0.67                                                     | 7.94                                                                                   | 12.45                                                                                  | 35.3                                                                                          | 36.4                                                                                          | 18                                                                             | 18                                                                             | 3932    | 10342          | TRK-fused gene                                                                        | Receptor regulator activity                  | Cytoplasm             | Enzyme regulator                    | Signal transduction                                                          | PB1, CC              | Yes                      |
| IDH3G       | 3421    | isocitrate dehydrogenase [NAD] subunit gamma, mitochondrial isoform a precursor | NP_004126.1       | 2          | 3                 | 3          | 8      | 1.02                                                     | 0.65                                                     | 4.35                                                                                   | 13.97                                                                                  | 8.9                                                                                           | 18.4                                                                                          | 4                                                                              | 4                                                                              | 2100    | 3421           | isocitrate dehydrogenase 3 (NAD+) gamma                                               | Catalytic activity                           | Mitochondrion         | Enzyme; Dehydrogenase               | Metabolism; Energy pathways                                                  | -                    | Yes                      |
| ARFRP1      | 10139   | ADP-ribosylation factor-related protein 1 isoform a                             | NP_003215.1       | 5          | 2                 | 2          | 3      | 1.01                                                     | 1.5                                                      | 18.77                                                                                  | 8.45                                                                                   | 27.3                                                                                          | 18.1                                                                                          | 2                                                                              | 2                                                                              | 5264    | 10139          | ADP-ribosylation factor related protein 1                                             | GTPase activity                              | Plasma membrane       | GTPase                              | Cell communication, Signal transduction                                      | ARF                  | Yes                      |
| GRN         | 2896    | granulin precursor                                                              | NP_002078.1       | 1          | 4                 | 4          | 5      | 1.01                                                     | 1.43                                                     | 9.33                                                                                   | 4.45                                                                                   | 19.1                                                                                          | 12.8                                                                                          | 4                                                                              | 4                                                                              | 733     | 2896           | granulin                                                                              | Growth factor activity                       | Extracellular         | Growth factor                       | Cell communication, Signal transduction                                      | GRAN, SP             | Yes                      |
| ANXA11      | 311     | annexin A11 isoform 1                                                           | NP_001148.1       | 4          | 13                | 13         | 49     | 1.01                                                     | 1.42                                                     | 4.01                                                                                   | 3.39                                                                                   | 19.2                                                                                          | 22.9                                                                                          | 22                                                                             | 22                                                                             | 3983    | 311            | annexin A11                                                                           | Calcium ion binding                          | Cytoplasm             | Calcium binding protein             | Signal transduction, Cell communication                                      | ANX                  | Yes                      |
| PSMA2       | 5683    | proteasome subunit alpha type-2                                                 | NP_002778.1       | 1          | 13                | 13         | 40     | 1.01                                                     | 1.36                                                     | 4.93                                                                                   | 6.55                                                                                   | 23.7                                                                                          | 43.6                                                                                          | 22                                                                             | 22                                                                             | 8907    | 5683           | proteasome (prosome, macropain) subunit, alpha type 2                                 | Ubiquitin-specific protease activity         | -                     | Ubiquitin proteasome system protein | Protein metabolism                                                           | -                    | Yes                      |
| SF3A1       | 10291   | splicing factor 3a subunit 1                                                    | NP_005868.1       | 1          | 21                | 21         | 51     | 1.01                                                     | 1.34                                                     | 5.2                                                                                    | 6.85                                                                                   | 27.2                                                                                          | 48.3                                                                                          | 26                                                                             | 25                                                                             | 6903    | 10291          | splicing factor 3a, subunit 1, 120kDa                                                 | RNA binding                                  | Nucleus               | RNA binding protein                 | Regulation of nucleobase, nucleoside, nucleotide and nucleic acid metabolism | UBQ, SWAP            | Yes                      |
| TUBB6       | 84617   | tubulin beta-6 chain isoform 1                                                  | NP_115914.1       | 6          | 14                | 27         | 337    | 1.01                                                     | 1.33                                                     | 5.53                                                                                   | 5.44                                                                                   | 54.5                                                                                          | 73.5                                                                                          | 83                                                                             | 83                                                                             | 11349   | 84617          | tubulin, beta 6                                                                       | Structural constituent of cytoskeleton       | -                     | Cytoskeletal protein                | Cell growth and/or maintenance                                               | TUBULIN              | Yes                      |
| SH3GLB2     | 56904   | endophilin-B2 isoform b                                                         | NP_064530.1       | 2          | 3                 | 4          | 6      | 1.01                                                     | 1.28                                                     | 4.05                                                                                   | 15.55                                                                                  | 5.8                                                                                           | 28.6                                                                                          | 2                                                                              | 2                                                                              | 15334   | 56904          | SH3-domain GRB2-like endophilin B2                                                    | Molecular function unknown                   | Cytoplasm             | Unclassified                        | Biological process unknown                                                   | BAR, SH3             | Yes                      |
| VTHB        | 10490   | vesicle transport through interaction with t-SNAREs homolog 1B                  | NP_006361.1       | 1          | 2                 | 2          | 7      | 1.01                                                     | 1.25                                                     | 12.73                                                                                  | 6.73                                                                                   | 22.6                                                                                          | 14.6                                                                                          | 3                                                                              | 3                                                                              | 4440    | 10490          | vesicle transport through interaction with-SNAREs homolog 1B (yeast)                  | Molecular function unknown                   | Cytoplasmic vesicle   | Unclassified                        | Transport                                                                    | TM, CC, SNARE        | No                       |
| PRPF4       | 9128    | U4U6 small nuclear ribonucleoprotein Prpf4 isoform 1                            | NP_004688.2       | 2          | 10                | 10         | 18     | 1.01                                                     | 1.25                                                     | 4.44                                                                                   | 3.77                                                                                   | 15                                                                                            | 15.7                                                                                          | 11                                                                             | 11                                                                             | 8479    | 9128           | PRP4 pre-mRNA processing factor 4 homolog (yeast)                                     | Ribonucleoprotein                            | Nucleus               | RNA binding protein                 | Regulation of nucleobase, nucleoside, nucleotide and nucleic acid metabolism | WD40                 | Yes                      |
| TCEA1       | 6917    | transcription elongation factor A protein 1 isoform 1                           | NP_006747.1       | 2          | 5                 | 5          | 9      | 1.01                                                     | 1.24                                                     | 9.09                                                                                   | 2.36                                                                                   | 20.8                                                                                          | 6.5                                                                                           | 5                                                                              | 5                                                                              | 3252    | 6917           | transcription elongation factor A (SII), 1                                            | Transcription regulator activity             | Nucleus; Cytoplasm    | Transcription factor                | Transcription                                                                | TFS, TFS2M, ZNF_C2C2 | Yes                      |
| PFDN6       | 10471   | prefoldin subunit 6                                                             | NP_001172110.1    | 1          | 1                 | 1          | 2      | 1.01                                                     | 1.23                                                     |                                                                                        |                                                                                        |                                                                                               |                                                                                               | 1                                                                              | 1                                                                              | 16135   | 10471          | HLA class II region expressed gene KE2                                                | Chaperone activity                           | -                     | Chaperone                           | Protein metabolism                                                           | CC                   | Yes                      |
| CHD1        | 66005   | chitinase domain-containing protein 1 isoform b precursor                       | NP_001136148.1    | 3          | 7                 | 7          | 15     | 1.01                                                     | 1.22                                                     | 6.77                                                                                   | 3.88                                                                                   | 19.5                                                                                          | 13.4                                                                                          | 8                                                                              | 8                                                                              | 14550   | 66005          | None                                                                                  | Transporter activity                         | Lysosome              | Transport/cargo protein             | Transport, Cell proliferation, Cell activation, Cell differentiation         | SP                   | No                       |



Supplementary Table S1. List of quantified proteins in OKF6/TERT1-Smoke cells  
 Raigopalani *et al.*, 2017. Role of protein kinase N2 (PKN2) in cigarette smoke-mediated oncogenic transformation of oral cells

| Gene Symbol | Gene ID   | Protein Description                                                     | Protein Accession | # Proteins | # Unique Peptides | # Peptides | # PSMs | OKF6/TERT1-Smoke/<br>OKF6/TERT1-Parental<br>(130/126) R1 | OKF6/TERT1-Smoke/<br>OKF6/TERT1-Parental<br>(128/127) R2 | Ratio Standard Errors [%]:<br>OKF6/TERT1-Smoke/<br>OKF6/TERT1-Parental<br>(130/126) R1 | Ratio Standard Errors [%]:<br>OKF6/TERT1-Smoke/<br>OKF6/TERT1-Parental<br>(128/127) R2 | Ratio Variabilities [%]:<br>F13: OKF6/TERT1-<br>Smoke/<br>OKF6/TERT1-Parental<br>(130/126) R1 | Ratio Variabilities [%]:<br>F13: OKF6/TERT1-<br>Smoke/<br>OKF6/TERT1-Parental<br>(128/127) R2 | Ratio Counts: F13:<br>OKF6/TERT1-Smoke/<br>OKF6/TERT1-Parental<br>(130/126) R1 | Ratio Counts: F13:<br>OKF6/TERT1-Smoke/<br>OKF6/TERT1-Parental<br>(128/127) R2 | HPRD ID | Entrez Gene ID | Gene Name                                                                                           | Molecular Function                         | Primary Localization  | Molecular Class                  | Biological Process                                                                                         | Domains          | Plasma Proteome Database |  |
|-------------|-----------|-------------------------------------------------------------------------|-------------------|------------|-------------------|------------|--------|----------------------------------------------------------|----------------------------------------------------------|----------------------------------------------------------------------------------------|----------------------------------------------------------------------------------------|-----------------------------------------------------------------------------------------------|-----------------------------------------------------------------------------------------------|--------------------------------------------------------------------------------|--------------------------------------------------------------------------------|---------|----------------|-----------------------------------------------------------------------------------------------------|--------------------------------------------|-----------------------|----------------------------------|------------------------------------------------------------------------------------------------------------|------------------|--------------------------|--|
| DPF2        | 5977      | zinc finger protein ubi-44                                              | NP_006259.1       | 1          | 5                 | 5          | 8      | 1.01                                                     | 0.99                                                     | 21.15                                                                                  | 7.78                                                                                   | 50.6                                                                                          | 17.3                                                                                          | 5                                                                              | 5                                                                              | 3394    | 5977           | D4, zinc and double PHD fingers family 2                                                            | DNA binding                                | Nucleus               | DNA binding protein              | Regulation of nucleobase, nucleoside, nucleotide and nucleic acid metabolism                               | ZNFC2,PHD        | Yes                      |  |
| PAICS       | 10606     | multifunctional protein ADE2 isoform 1                                  | NP_001072993.1    | 2          | 19                | 19         | 72     | 1.01                                                     | 0.99                                                     | 3.04                                                                                   | 7.34                                                                                   | 20.7                                                                                          | 50.3                                                                                          | 44                                                                             | 43                                                                             | 1401    | 10606          | phosphoribosylaminoimidazole carboxylase,phosphoribosylaminoimidazole succinocarboxamide synthetase | Ligase activity                            | Nucleus               | Enzyme: Carboxylase              | Metabolism;Energy pathways                                                                                 | -                | Yes                      |  |
| PTPRM1      | 10531     | presepsin protease, mitochondrial isoform 1 precursor                   | NP_001229236.1    | 3          | 23                | 23         | 42     | 1.01                                                     | 0.99                                                     | 3.92                                                                                   | 4.09                                                                                   | 20.4                                                                                          | 20.8                                                                                          | 26                                                                             | 26                                                                             | 7142    | 10531          | patrilysin metalloproteinase 1                                                                      | Metallopeptidase activity                  | Extracellular         | Metallo protease                 | Protein metabolism                                                                                         | -                | Yes                      |  |
| SMG8        | 55181     | protein SMG8                                                            | NP_060619.4       | 1          | 4                 | 5          | 7      | 1.01                                                     | 0.98                                                     | 6.79                                                                                   | 14.28                                                                                  | 12                                                                                            | 24.7                                                                                          | 3                                                                              | 3                                                                              |         |                |                                                                                                     |                                            |                       |                                  |                                                                                                            |                  |                          |  |
| RBM14       | 10432     | RNA-binding protein 14 isoform 1                                        | NP_006319.1       | 4          | 21                | 21         | 49     | 1.01                                                     | 0.98                                                     | 5.78                                                                                   | 8.88                                                                                   | 29.8                                                                                          | 46.7                                                                                          | 25                                                                             | 26                                                                             | 11485   | 10432          | RNA binding motif protein 14                                                                        | RNA binding                                | Nucleus               | RNA binding protein              | Regulation of nucleobase, nucleoside and nucleic acid metabolism                                           | RRM              | Yes                      |  |
| STRN3       | 29966     | striatin-3 isoform 1                                                    | NP_001077362.1    | 2          | 4                 | 4          | 8      | 1.01                                                     | 0.98                                                     | 4.7                                                                                    | 20.66                                                                                  | 9.5                                                                                           | 42.3                                                                                          | 4                                                                              | 4                                                                              | 11613   | 29966          | striatin, calcimedin binding protein 3                                                              | Calcium ion binding                        | Nucleus               | Calcium binding protein          | Cell communication;Signal transduction                                                                     | CC;WD40;NLS      | Yes                      |  |
| NDNL2       | 56160     | melanoma-associated antigen G1                                          | NP_619649.1       | 1          | 3                 | 3          | 4      | 1.01                                                     | 0.98                                                     | 0.05                                                                                   | 2.5                                                                                    | 0.1                                                                                           | 3.5                                                                                           | 2                                                                              | 2                                                                              | 10503   | 56160          | necdin-like 2                                                                                       | Molecular function unknown                 | Nucleolus             | Unclassified                     | Biological process unknown                                                                                 | MAGE             | Yes                      |  |
| Sep-7       | 989       | septin-7 isoform 1                                                      | NP_001779.3       | 4          | 24                | 25         | 84     | 1.01                                                     | 0.97                                                     | 3.51                                                                                   | 5.5                                                                                    | 20.6                                                                                          | 31.5                                                                                          | 33                                                                             | 33                                                                             |         |                |                                                                                                     |                                            |                       |                                  |                                                                                                            |                  |                          |  |
| CERS2       | 29956     | ceramide synthase 2                                                     | NP_859530.1       | 1          | 2                 | 2          | 3      | 1.01                                                     | 0.97                                                     | 9.76                                                                                   | 26.21                                                                                  | 14                                                                                            | 37.2                                                                                          | 2                                                                              | 2                                                                              |         |                |                                                                                                     |                                            |                       |                                  |                                                                                                            |                  |                          |  |
| MRRF        | 92399     | ribosome-recycling factor, mitochondrial isoform 1 precursor            | NP_620132.1       | 3          | 6                 | 6          | 17     | 1.01                                                     | 0.96                                                     | 11.88                                                                                  | 10.32                                                                                  | 39.5                                                                                          | 32                                                                                            | 10                                                                             | 10                                                                             | 6856    | 92399          | mitochondrial ribosome recycling factor                                                             | Molecular function unknown                 | Mitochondrion         | Unclassified                     | Biological process unknown                                                                                 | CC               | Yes                      |  |
| TIMM21      | 29090     | mitochondrial import inner membrane translocase subunit Tim21 precursor | NP_054896.2       | 1          | 2                 | 2          | 4      | 1.01                                                     | 0.96                                                     | 0.68                                                                                   | 11.24                                                                                  | 1                                                                                             | 15.3                                                                                          | 2                                                                              | 2                                                                              |         |                |                                                                                                     |                                            |                       |                                  |                                                                                                            |                  |                          |  |
| RAB34       | 83871     | ras-related protein Rab-34 isoform 5                                    | NP_001138415.1    | 7          | 3                 | 3          | 5      | 1.01                                                     | 0.95                                                     | 3.28                                                                                   | 2.39                                                                                   | 4.7                                                                                           | 3.2                                                                                           | 2                                                                              | 2                                                                              | 6701    | 83871          | RAB34, member RAS oncogene family                                                                   | GTPase activity                            | Golgi apparatus       | GTPase                           | Cell communication;Signal transduction                                                                     | RAB;Small_GTPase | Yes                      |  |
| MORF4L1     | 10933     | mortality factor 4-like protein 1 isoform 2                             | NP_996670.1       | 2          | 2                 | 2          | 2      | 1.01                                                     | 0.95                                                     | 13.79                                                                                  | 5.68                                                                                   | 19.9                                                                                          | 7.7                                                                                           | 2                                                                              | 2                                                                              | 9532    | 10933          | mortality factor 4 like 1                                                                           | Transcription regulator activity           | Nucleus               | Transcription regulatory protein | Regulation of nucleobase, nucleoside and nucleic acid metabolism;Regulation of gene expression, epigenetic | CHROMO           | Yes                      |  |
| NUMA1       | 4926      | nuclear mitotic apparatus protein 1 isoform 1                           | NP_006176.2       | 2          | 69                | 69         | 156    | 1.01                                                     | 0.95                                                     | 2.14                                                                                   | 2.9                                                                                    | 19.9                                                                                          | 25.7                                                                                          | 83                                                                             | 83                                                                             | 1236    | 4926           | nuclear mitotic apparatus protein 1                                                                 | Structural molecule activity               | Nucleus               | Structural protein               | Cell growth and/or maintenance                                                                             | CC               | Yes                      |  |
| PARG        | 8505      | poly(ADP-ribose) glycohydrolase isoform a                               | NP_003622.2       | 3          | 2                 | 2          | 3      | 1.01                                                     | 0.94                                                     | 12.92                                                                                  | 15.98                                                                                  | 18.6                                                                                          | 21.5                                                                                          | 2                                                                              | 2                                                                              | 4611    | 8505           | poly (ADP-ribose) glycohydrolase                                                                    | Hydrolase activity                         | Cytoplasm             | Enzyme: Hydrolase                | Metabolism;Energy pathways                                                                                 | -                | Yes                      |  |
| EIF3E       | 3646      | eukaryotic translation initiation factor 3 subunit E                    | NP_001559.1       | 1          | 14                | 14         | 59     | 1.01                                                     | 0.94                                                     | 3.28                                                                                   | 4.65                                                                                   | 16.6                                                                                          | 22.1                                                                                          | 25                                                                             | 25                                                                             | 3734    | 3646           | eukaryotic translation initiation factor 3,subunit 6 48kDa                                          | Translation regulator activity             | Cytoplasm             | Translation regulatory protein   | Protein metabolism                                                                                         | -                | Yes                      |  |
| SLC38A2     | 54407     | sodium-coupled neutral amino acid transporter 2 isoform 1               | NP_061849.2       | 2          | 3                 | 3          | 12     | 1.01                                                     | 0.93                                                     | 7.46                                                                                   | 5.02                                                                                   | 18.7                                                                                          | 11.4                                                                                          | 6                                                                              | 6                                                                              | 5535    | 54407          | solute carrier family 38, member 2                                                                  | Transporter activity                       | Plasma membrane       | Transport/cargo protein          | Transport                                                                                                  | TM               | No                       |  |
| SMC1A       | 8243      | structural maintenance of chromosomes protein 1A isoform 1              | NP_006297.2       | 2          | 19                | 19         | 38     | 1.01                                                     | 0.93                                                     | 4.29                                                                                   | 4.99                                                                                   | 20.5                                                                                          | 22                                                                                            | 22                                                                             | 22                                                                             | 2077    | 8243           | SMC1 structural maintenance of chromosomes-like 1 (yeast)                                           | Chromatin binding                          | Nucleus               | Cell cycle control protein       | Cell communication;Signal transduction                                                                     | CC               | Yes                      |  |
| PHLDB2      | 90102     | pleckstrin homology-like domain family B member 2 isoform b             | NP_001127909.1    | 3          | 8                 | 8          | 11     | 1.01                                                     | 0.93                                                     | 5.97                                                                                   | 2.83                                                                                   | 16.1                                                                                          | 6.9                                                                                           | 7                                                                              | 7                                                                              | 6611    | 90102          | pleckstrin homology-like domain, family B,member 2                                                  | Cytoskeletal protein binding               | Cytoplasm             | Cytoskeletal associated protein  | Cell communication;Signal transduction                                                                     | CC;PH            | No                       |  |
| PLA2G15     | 23659     | group XV phospholipase A2 precursor                                     | NP_036452.1       | 1          | 3                 | 3          | 5      | 1.01                                                     | 0.93                                                     | 11.38                                                                                  | 0.97                                                                                   | 23.4                                                                                          | 1.8                                                                                           | 4                                                                              | 4                                                                              | 7128    | 23659          | lysophospholipase 3 (lysosomal phospholipaseA2)                                                     | Phospholipase activity                     | Extracellular         | Enzyme: Phospholipase            | Metabolism;Energy pathways                                                                                 | SP               | Yes                      |  |
| AJUBA       | 84962     | LIM domain-containing protein ajuba isoform 1                           | NP_116265.1       | 2          | 3                 | 3          | 5      | 1.01                                                     | 0.93                                                     | 2.36                                                                                   | 5.45                                                                                   | 3.4                                                                                           | 7.2                                                                                           | 2                                                                              | 2                                                                              |         |                |                                                                                                     |                                            |                       |                                  |                                                                                                            |                  |                          |  |
| CHURC1-FNTB | 100529261 | CHURC1-FNTB protein isoform 1                                           | NP_001189488.1    | 3          | 1                 | 1          | 2      | 1.01                                                     | 0.93                                                     | 10.36                                                                                  | 1.7                                                                                    | 14.9                                                                                          | 2.2                                                                                           | 2                                                                              | 2                                                                              |         |                |                                                                                                     |                                            |                       |                                  |                                                                                                            |                  |                          |  |
| CIAPIN1     | 57019     | anamorsin isoform 1                                                     | NP_064709.2       | 3          | 4                 | 4          | 7      | 1.01                                                     | 0.93                                                     | 8.38                                                                                   | 7.6                                                                                    | 19.1                                                                                          | 16                                                                                            | 5                                                                              | 5                                                                              | 12338   | 57019          | cytokine induced apoptosis inhibitor 1                                                              | Molecular function unknown                 | Cytoplasm             | Unclassified                     | Cell growth and/or maintenance                                                                             | -                | Yes                      |  |
| EIF4E       | 1977      | eukaryotic translation initiation factor 4E isoform 2                   | NP_001124151.1    | 4          | 3                 | 4          | 15     | 1.01                                                     | 0.92                                                     | 12.17                                                                                  | 7.92                                                                                   | 35.9                                                                                          | 20.8                                                                                          | 8                                                                              | 8                                                                              | 591     | 1977           | eukaryotic translation initiation factor 4E                                                         | Translation regulator activity             | Nucleus               | Translation regulatory protein   | Protein metabolism                                                                                         | NLS              | Yes                      |  |
| RPC2        | 5982      | replication factor C subunit 2 isoform 1                                | NP_852136.1       | 5          | 5                 | 5          | 8      | 1.01                                                     | 0.92                                                     | 1.88                                                                                   | 7.19                                                                                   | 3.8                                                                                           | 13.2                                                                                          | 4                                                                              | 4                                                                              | 2675    | 5982           | replication factor C (activator 1) 2, 40kDa                                                         | DNA binding                                | Nucleolus             | DNA binding protein              | DNA replication                                                                                            | AAA              | Yes                      |  |
| IPO13       | 9670      | importin-13                                                             | NP_055467.3       | 1          | 2                 | 2          | 3      | 1.01                                                     | 0.91                                                     |                                                                                        |                                                                                        |                                                                                               |                                                                                               | 1                                                                              | 1                                                                              | 13742   | 9670           | importin 13                                                                                         | Ligand-dependent nuclear receptor activity | Cytoplasm             | Nuclear receptor                 | Cell communication;Signal transduction                                                                     | -                | Yes                      |  |
| EPM2AIP1    | 9852      | EPM2A-interacting protein 1                                             | NP_055620.1       | 1          | 2                 | 2          | 4      | 1.01                                                     | 0.91                                                     | 7.26                                                                                   | 4.5                                                                                    | 10.4                                                                                          | 5.8                                                                                           | 2                                                                              | 2                                                                              | 7445    | 9852           | EPM2A (aforin) interacting protein 1                                                                | Molecular function unknown                 | Endoplasmic reticulum | Unclassified                     | Biological process unknown                                                                                 | CC               | Yes                      |  |
| RPL13A      | 23521     | 60S ribosomal protein L13a isoform 1                                    | NP_036555.1       | 2          | 13                | 13         | 45     | 1.01                                                     | 0.9                                                      | 3.04                                                                                   | 3.62                                                                                   | 14.4                                                                                          | 15.3                                                                                          | 22                                                                             | 22                                                                             | 11775   | 23521          | ribosomal protein L13a                                                                              | Structural constituent of ribosome         | Ribosome              | Ribosomal subunit                | Protein metabolism                                                                                         | CC               | Yes                      |  |
| REPS1       | 85021     | ralBP1-associated Eps domain-containing protein 1 isoform c             | NP_001273540.1    | 4          | 7                 | 7          | 12     | 1.01                                                     | 0.89                                                     | 6.98                                                                                   | 23.52                                                                                  | 18.9                                                                                          | 59.9                                                                                          | 7                                                                              | 7                                                                              | 9687    | 85021          | RALBP1 associated Eps domain containing 1                                                           | Calcium ion binding                        | Cytoplasm             | Calcium binding protein          | Cell communication;Signal transduction                                                                     | EHSP;CC          | Yes                      |  |

Supplementary Table S1. List of quantified proteins in OKF6/TERT1-Smoke cells  
 Raiganalan et al., 2017. Role of protein kinase N2 (PKN2) in cigarette smoke-mediated oncogenic transformation of oral cells

| Gene Symbol | Gene ID | Protein Description                                             | Protein Accession | # Proteins | # Unique Peptides | # Peptides | # PSMs | OKF6/TERT1-Smoke/OKF6/TERT1-Parental (130/126) R1 | OKF6/TERT1-Smoke/OKF6/TERT1-Parental (128/127) R2 | Ratio Standard Errors [%]: OKF6/TERT1-Smoke/OKF6/TERT1-Parental (130/126) R1 | Ratio Standard Errors [%]: OKF6/TERT1-Smoke/OKF6/TERT1-Parental (128/127) R2 | Ratio Variabilities [%]: F13: OKF6/TERT1-Smoke/OKF6/TERT1-Parental (130/126) R1 | Ratio Variabilities [%]: F13: OKF6/TERT1-Smoke/OKF6/TERT1-Parental (128/127) R2 | Ratio Counts: F13: OKF6/TERT1-Smoke/OKF6/TERT1-Parental (130/126) R1 | Ratio Counts: F13: OKF6/TERT1-Smoke/OKF6/TERT1-Parental (128/127) R2 | HPRD ID | Entrez Gene Id | Gene Name                                                                   | Molecular Function                       | Primary Localization  | Molecular Class                  | Biological Process                                                           | Domains                    | Plasma Proteome Database |
|-------------|---------|-----------------------------------------------------------------|-------------------|------------|-------------------|------------|--------|---------------------------------------------------|---------------------------------------------------|------------------------------------------------------------------------------|------------------------------------------------------------------------------|---------------------------------------------------------------------------------|---------------------------------------------------------------------------------|----------------------------------------------------------------------|----------------------------------------------------------------------|---------|----------------|-----------------------------------------------------------------------------|------------------------------------------|-----------------------|----------------------------------|------------------------------------------------------------------------------|----------------------------|--------------------------|
| CDK5        | 1020    | cyclin-dependent-like kinase 5 isoform 1                        | NP_004926.1       | 47         | 3                 | 4          | 22     | 1.01                                              | 0.89                                              | 2.8                                                                          | 1.96                                                                         | 4.9                                                                             | 3                                                                               | 3                                                                    | 3                                                                    | 449     | 1020           | cyclin-dependent kinase 5                                                   | Protein serine/threonine kinase activity | Nucleus               | Serine/threonine kinase          | Cell communication;Signal transduction                                       | S_T_kinase                 | Yes                      |
| METAP1      | 23173   | methionine aminopeptidase 1                                     | NP_055958.2       | 1          | 4                 | 4          | 8      | 1.01                                              | 0.87                                              | 24.44                                                                        | 23.51                                                                        | 52.6                                                                            | 42.8                                                                            | 4                                                                    | 4                                                                    | 10071   | 23173          | methionyl aminopeptidase 1                                                  | Aminopeptidase activity                  | Nucleolus             | Aminopeptidase                   | Protein metabolism                                                           | -                          | Yes                      |
| RPS27       | 6232    | 40S ribosomal protein S27                                       | NP_001021.1       | 1          | 2                 | 4          | 25     | 1.01                                              | 0.87                                              | 3.88                                                                         | 7.91                                                                         | 6.8                                                                             | 12                                                                              | 3                                                                    | 3                                                                    | 4744    | 6232           | ribosomal protein S27 (metalloprotein family)                               | Structural constituent of ribosome       | Cytoplasm             | Ribosomal subunit                | Regulation of nucleobase, nucleoside, nucleotide and nucleic acid metabolism | -                          | Yes                      |
| CNDP2       | 55748   | cytosolic non-specific dipeptidase isoform 1                    | NP_060705.2       | 2          | 18                | 18         | 88     | 1.01                                              | 0.87                                              | 3.3                                                                          | 3.91                                                                         | 22.9                                                                            | 23.1                                                                            | 46                                                                   | 45                                                                   | 9893    | 55748          | CNDP dipeptidase 2 (metallopeptidase M20family)                             | Metallopeptidase activity                | Cytoplasm             | Metallo protease                 | Protein metabolism                                                           | -                          | Yes                      |
| MBD1        | 4152    | methyl-CpG-binding domain protein 1 isoform 6                   | NP_001191065.1    | 13         | 3                 | 3          | 7      | 1.01                                              | 0.86                                              | 11.03                                                                        | 2.57                                                                         | 19.5                                                                            | 3.8                                                                             | 3                                                                    | 3                                                                    | 1133    | 4152           | methyl-CpG binding domain protein 1                                         | Transcription regulator activity         | Nucleus               | Transcription regulatory protein | Regulation of nucleobase, nucleoside, nucleotide and nucleic acid metabolism | MBD                        | Yes                      |
| CD276       | 80381   | CD276 antigen isoform a precursor                               | NP_001019907.1    | 1          | 2                 | 2          | 7      | 1.01                                              | 0.86                                              | 2.8                                                                          | 4.67                                                                         | 5.7                                                                             | 8.1                                                                             | 4                                                                    | 4                                                                    | 5756    | 80381          | CD276 antigen                                                               | Receptor binding                         | Plasma membrane       | Ligand                           | Immune response                                                              | SPJG;TM;GV;JG;C            | Yes                      |
| TMEM126A    | 84233   | transmembrane protein 126A isoform 1                            | NP_115649.1       | 1          | 1                 | 1          | 2      | 1.01                                              | 0.86                                              |                                                                              |                                                                              |                                                                                 |                                                                                 | 1                                                                    | 1                                                                    | 13216   | 84233          | None                                                                        | Molecular function unknown               | -                     | Unclassified                     | Biological_process unknown                                                   | TM                         | No                       |
| HEATR1      | 55127   | HEAT repeat-containing protein 1                                | NP_060542.4       | 1          | 10                | 10         | 20     | 1.01                                              | 0.86                                              | 7.31                                                                         | 8.99                                                                         | 26.1                                                                            | 27.3                                                                            | 12                                                                   | 12                                                                   | 10962   | 55127          | None                                                                        | Molecular function unknown               | -                     | Unclassified                     | Biological_process unknown                                                   | CC                         | Yes                      |
| BMP2K       | 55589   | BMP-2-inducible protein kinase isoform a                        | NP_942595.1       | 2          | 2                 | 2          | 4      | 1.01                                              | 0.85                                              | 1.84                                                                         | 1.84                                                                         | 2.6                                                                             | 2.2                                                                             | 2                                                                    | 2                                                                    | 9828    | 55589          | BMP2 inducible kinase                                                       | Protein serine/threonine kinase activity | Nucleus               | Serine/threonine kinase          | Cell communication;Signal transduction                                       | S_T_kinase;NLS             | Yes                      |
| CDC42BPB    | 9578    | serine/threonine-protein kinase MRCK beta                       | NP_006026.3       | 8          | 11                | 13         | 26     | 1.01                                              | 0.85                                              | 2.97                                                                         | 4.6                                                                          | 10.4                                                                            | 13.6                                                                            | 12                                                                   | 12                                                                   | 8516    | 9578           | CDC42 binding protein kinase beta(DMPK-like)                                | Protein serine/threonine kinase activity | Cytoplasm             | Serine/threonine kinase          | Cell communication;Signal transduction                                       | S_T_kinase;CC;C1;PHCNH;PBD | No                       |
| ATP5F1      | 515     | ATP synthase F0 complex subunit B1, mitochondrial precursor     | NP_001679.2       | 1          | 11                | 11         | 23     | 1.01                                              | 0.82                                              | 6.02                                                                         | 14.15                                                                        | 23.1                                                                            | 45.4                                                                            | 14                                                                   | 14                                                                   | 4467    | 515            | ATP synthase, H+-transporting-mitochondrialF0 complex, subunit b, isoform 1 | Transporter activity                     | Mitochondrion         | Transport/cargo protein          | Metabolism;Energy pathways                                                   | SP;CC                      | Yes                      |
| COP9A       | 50813   | COP9 signalosome complex subunit 7a                             | NP_057403.1       | 1          | 5                 | 5          | 9      | 1.01                                              | 0.81                                              | 12.53                                                                        | 20.2                                                                         | 28.9                                                                            | 37.6                                                                            | 5                                                                    | 5                                                                    | 16736   | 50813          | COP9 constitutive photomorphogenic homolog subunit 7A (Arabidopsis)         | Transcription regulator activity         | Nucleus               | Transcription regulatory protein | Regulation of nucleobase, nucleoside, nucleotide and nucleic acid metabolism | PNT;CC                     | Yes                      |
| MDC1        | 9656    | mediator of DNA damage checkpoint protein 1                     | NP_055456.2       | 1          | 11                | 11         | 18     | 1.01                                              | 0.8                                               | 2.8                                                                          | 7.92                                                                         | 9                                                                               | 20.2                                                                            | 10                                                                   | 10                                                                   | 16252   | 9656           | mediator of DNA damage checkpoint 1                                         | DNA repair protein                       | Nucleus;Cytoplasm     | DNA repair protein               | Regulation of nucleobase, nucleoside, nucleotide and nucleic acid metabolism | BRCT;FHA                   | No                       |
| UBAP2L      | 9898    | ubiquitin-associated protein 2-like isoform a                   | NP_055662.3       | 2          | 1                 | 26         | 69     | 1.01                                              | 0.8                                               |                                                                              |                                                                              |                                                                                 |                                                                                 | 1                                                                    | 1                                                                    | 6665    | 9898           | ubiquitin associated protein 2-like                                         | Molecular function unknown               | Nucleus               | Unclassified                     | Biological_process unknown                                                   | UBA                        | Yes                      |
| RAB2A       | 5862    | ras-related protein Rab-2A isoform a                            | NP_002856.1       | 2          | 4                 | 11         | 63     | 1.01                                              | 0.79                                              | 1.73                                                                         | 7.25                                                                         | 7.2                                                                             | 24                                                                              | 17                                                                   | 17                                                                   | 1539    | 5862           | RAB2, member RAS oncogene family                                            | GTPase activity                          | Endoplasmic reticulum | GTPase                           | Cell communication;Signal transduction                                       | RAB                        | Yes                      |
| THEM6       | 51337   | protein THEM6 precursor                                         | NP_057731.1       | 1          | 1                 | 1          | 1      | 1.01                                              | 0.77                                              |                                                                              |                                                                              |                                                                                 |                                                                                 | 1                                                                    | 1                                                                    |         |                |                                                                             |                                          |                       |                                  |                                                                              |                            |                          |
| TUBA1C      | 84790   | tubulin alpha-1C chain isoform a                                | NP_001290043.1    | 5          | 4                 | 31         | 488    | 1.01                                              | 0.75                                              | 3.34                                                                         | 7.62                                                                         | 23.2                                                                            | 40.5                                                                            | 46                                                                   | 46                                                                   | 6747    | 84790          | None                                                                        | Structural constituent of cytoskeleton   | Cytoplasm             | Cytoskeletal protein             | Cell growth and/or maintenance                                               | CC;TUBULIN                 | Yes                      |
| RMDN1       | 51115   | regulator of microtubule dynamics protein 1 isoform 1           | NP_057117.2       | 3          | 2                 | 2          | 3      | 1.01                                              | 0.75                                              | 0.94                                                                         | 34                                                                           | 1.3                                                                             | 37.1                                                                            | 2                                                                    | 2                                                                    |         |                |                                                                             |                                          |                       |                                  |                                                                              |                            |                          |
| SLA2        | 84174   | src-like-adaptor 2 isoform a                                    | NP_115590.1       | 2          | 1                 | 1          | 1      | 1.01                                              | 0.69                                              |                                                                              |                                                                              |                                                                                 |                                                                                 | 1                                                                    | 1                                                                    | 5955    | 84174          | Src-like-adaptor 2                                                          | Molecular function unknown               | Endosome              | Adapter molecule                 | Regulation of immune response;Signal transduction                            | SH3;SH2;SP                 | Yes                      |
| PCNXL2      | 80003   | pecanex-like protein 2                                          | NP_055616.3       | 1          | 1                 | 1          | 1      | 1.01                                              | 0.58                                              |                                                                              |                                                                              |                                                                                 |                                                                                 | 1                                                                    | 1                                                                    | 15108   | 80003          | pecanex-like 2 (Drosophila)                                                 | Molecular function unknown               | -                     | Unclassified                     | Biological_process unknown                                                   | TM                         | No                       |
| EXOSC8      | 11340   | exosome complex component RRP43                                 | NP_852480.1       | 1          | 3                 | 3          | 8      | 1                                                 | 1.72                                              | 5.1                                                                          | 17.41                                                                        | 8.9                                                                             | 55.6                                                                            | 3                                                                    | 3                                                                    | 9351    | 11340          | exosome component 8                                                         | Ribonuclease activity                    | Nucleolus             | Ribonuclease                     | Regulation of nucleobase, nucleoside, nucleotide and nucleic acid metabolism | -                          | Yes                      |
| SETD1A      | 9739    | histone-lysine N-methyltransferase SETD1A                       | NP_055527.1       | 1          | 1                 | 1          | 2      | 1                                                 | 1.42                                              |                                                                              |                                                                              |                                                                                 |                                                                                 | 1                                                                    | 1                                                                    | 13795   | 9739           | None                                                                        | Methyltransferase activity               | Nucleus               | Enzyme: Methyltransferase        | Cell differentiation;Cell proliferation                                      | RRM;SET;PSET               | No                       |
| ADH1A       | 124     | alcohol dehydrogenase 1A                                        | NP_000658.1       | 2          | 1                 | 1          | 7      | 1                                                 | 1.36                                              | 2.2                                                                          | 3.11                                                                         | 4.9                                                                             | 9.4                                                                             | 5                                                                    | 5                                                                    | 63      | 124            | alcohol dehydrogenase 1A (class I, aliphatic) polypeptide                   | Oxidoreductase activity                  | Cytoplasm             | Enzyme: Oxidoreductase           | Metabolism;Energy pathways                                                   | -                          | Yes                      |
| ICT1        | 3396    | peptidyl-rRNA hydrolase ICT1, mitochondrial isoform 2 precursor | NP_001290194.1    | 2          | 4                 | 4          | 10     | 1                                                 | 1.33                                              | 5.34                                                                         | 4.1                                                                          | 12                                                                              | 12.2                                                                            | 5                                                                    | 5                                                                    | 4299    | 3396           | immature colon carcinoma transcript 1                                       | Molecular function unknown               | -                     | Unclassified                     | Immune response                                                              | -                          | Yes                      |
| TAB3        | 257397  | TGF-beta-activated kinase 1 and MAP3K7-binding protein 3        | NP_690000.3       | 1          | 1                 | 1          | 2      | 1                                                 | 1.29                                              |                                                                              |                                                                              |                                                                                 |                                                                                 | 1                                                                    | 1                                                                    |         |                |                                                                             |                                          |                       |                                  |                                                                              |                            |                          |
| RPL37A      | 6168    | 60S ribosomal protein L37a                                      | NP_000989.1       | 1          | 5                 | 5          | 29     | 1                                                 | 1.24                                              | 5.94                                                                         | 6.57                                                                         | 23.4                                                                            | 32.4                                                                            | 15                                                                   | 15                                                                   | 17997   | 6168           | ribosomal protein L37a                                                      | Structural constituent of ribosome       | Ribosome              | Ribosomal subunit                | Protein metabolism                                                           | -                          | No                       |
| GABPA       | 2551    | GA-binding protein alpha chain                                  | NP_001184226.1    | 1          | 6                 | 6          | 11     | 1                                                 | 1.24                                              | 7.31                                                                         | 8.17                                                                         | 19.5                                                                            | 27.3                                                                            | 7                                                                    | 7                                                                    | 11793   | 2551           | GA binding protein transcription factor, alpha subunit 60kDa                | Transcription factor activity            | Nucleus               | Transcription factor             | Regulation of nucleobase, nucleoside, nucleotide and nucleic acid metabolism | SAM_PNT;ETS                | Yes                      |

Supplementary Table S1. List of quantified proteins in OKF6/TERT1-Smoke cells

Raigonalan *et al.*, 2017. Role of protein kinase N2 (PKN2) in cigarette smoke-mediated oncogenic transformation of oral cells

| Gene Symbol | Gene ID | Protein Description                                                                 | Protein Accession | # Proteins | # Unique Peptides | # Peptides | # PSMs | OKF6/TERT1-Smoke/<br>OKF6/TERT1-Parental<br>(130/126) R1 | OKF6/TERT1-Smoke/<br>OKF6/TERT1-Parental<br>(128/127) R2 | Ratio Standard Errors [%]:<br>OKF6/TERT1-Smoke/<br>OKF6/TERT1-Parental<br>(130/126) R1 | Ratio Standard Errors [%]:<br>OKF6/TERT1-Smoke/<br>OKF6/TERT1-Parental<br>(128/127) R2 | Ratio Variabilities [%]:<br>F13: OKF6/TERT1-<br>Smoke/<br>OKF6/TERT1-Parental<br>(130/126) R1 | Ratio Variabilities [%]:<br>F13: OKF6/TERT1-<br>Smoke/<br>OKF6/TERT1-Parental<br>(128/127) R2 | Ratio Counts: F13:<br>OKF6/TERT1-Smoke/<br>OKF6/TERT1-Parental<br>(130/126) R1 | Ratio Counts: F13:<br>OKF6/TERT1-Smoke/<br>OKF6/TERT1-Parental<br>(128/127) R2 | HPRD ID | Entrez Gene ID | Gene Name                                                                        | Molecular Function                              | Primary Localization               | Molecular Class                    | Biological Process                                               | Domains    | Plasma Proteome Database |
|-------------|---------|-------------------------------------------------------------------------------------|-------------------|------------|-------------------|------------|--------|----------------------------------------------------------|----------------------------------------------------------|----------------------------------------------------------------------------------------|----------------------------------------------------------------------------------------|-----------------------------------------------------------------------------------------------|-----------------------------------------------------------------------------------------------|--------------------------------------------------------------------------------|--------------------------------------------------------------------------------|---------|----------------|----------------------------------------------------------------------------------|-------------------------------------------------|------------------------------------|------------------------------------|------------------------------------------------------------------|------------|--------------------------|
| UTP20       | 27340   | small subunit processome component 20 homolog                                       | NP_055318.2       | 1          | 6                 | 6          | 7      | 1                                                        | 1.23                                                     | 11.53                                                                                  | 27.59                                                                                  | 20.1                                                                                          | 64                                                                                            | 3                                                                              | 3                                                                              | 9928    | 27340          | None                                                                             | Molecular function unknown                      | Nucleolus                          | Unclassified                       | Cell communication;Signal transduction                           | -          | No                       |
| PPP2R5A     | 5525    | serine/threonine-protein phosphatase 2A 56 kDa regulatory subunit alpha isoform 1   | NP_006234.1       | 2          | 3                 | 3          | 10     | 1                                                        | 1.23                                                     | 3.64                                                                                   | 6.41                                                                                   | 9                                                                                             | 19.5                                                                                          | 6                                                                              | 6                                                                              | 3384    | 5525           | protein phosphatase 2, regulatory subunit B(B56), alpha isoform                  | Protein serine/threonine phosphatase activity   | Cytoplasm                          | Serine/threonine phosphatase       | Cell communication;Signal transduction                           | CC         | Yes                      |
| HNRNPL      | 3191    | heterogeneous nuclear ribonucleoprotein L isoform a                                 | NP_001524.2       | 2          | 23                | 24         | 114    | 1                                                        | 1.22                                                     | 5.19                                                                                   | 6.8                                                                                    | 40.2                                                                                          | 68.2                                                                                          | 56                                                                             | 56                                                                             | 4360    | 3191           | heterogeneous nuclear ribonucleoprotein L                                        | RNA binding                                     | Nucleus                            | Ribonucleoprotein                  | Regulation of nucleobase, nucleotide and nucleic acid metabolism | RRM        | Yes                      |
| LAP3        | 51056   | cytosol aminopeptidase                                                              | NP_056991.2       | 1          | 22                | 22         | 77     | 1                                                        | 1.2                                                      | 2.4                                                                                    | 4.38                                                                                   | 14.9                                                                                          | 33.3                                                                                          | 38                                                                             | 38                                                                             | 7516    | 51056          | leucine aminopeptidase 3                                                         | Aminopeptidase activity                         | Cytoplasm                          | Aminopeptidase                     | Protein metabolism                                               | -          | Yes                      |
| COPS4       | 51138   | COP9 signalosome complex subunit 4 isoform 1                                        | NP_057213.2       | 2          | 11                | 11         | 22     | 1                                                        | 1.19                                                     | 5.98                                                                                   | 7.17                                                                                   | 21                                                                                            | 30.2                                                                                          | 12                                                                             | 12                                                                             | 9888    | 51138          | COP9 constitutive photomorphogenic homolog subunit 4 (Arabidopsis)               | Molecular function unknown                      | -                                  | Unclassified                       | Protein metabolism                                               | PINT       | No                       |
| C5orf51     | 285636  | UPF0600 protein C5orf51                                                             | NP_787117.3       | 1          | 1                 | 1          | 7      | 1                                                        | 1.18                                                     | 17.53                                                                                  | 21.66                                                                                  | 31.2                                                                                          | 46.5                                                                                          | 3                                                                              | 3                                                                              | 11258   | 285636         | None                                                                             | Molecular function unknown                      | -                                  | Unclassified                       | Biological processes unknown                                     | -          | No                       |
| EIF3B       | 8662    | eukaryotic translation initiation factor 3 subunit B                                | NP_003742.2       | 1          | 29                | 29         | 88     | 1                                                        | 1.18                                                     | 3.89                                                                                   | 3.95                                                                                   | 27.7                                                                                          | 33.7                                                                                          | 49                                                                             | 50                                                                             | 6795    | 8662           | eukaryotic translation initiation factor 3, subunit 9 eta, 116kDa                | Translation regulator activity                  | Ribosome                           | Translation regulator protein      | Protein metabolism                                               | RRM        | Yes                      |
| GSS         | 2937    | glutathione synthetase                                                              | NP_000169.1       | 1          | 20                | 20         | 59     | 1                                                        | 1.18                                                     | 3.04                                                                                   | 2.14                                                                                   | 17                                                                                            | 13.9                                                                                          | 31                                                                             | 30                                                                             | 3000    | 2937           | glutathione synthetase                                                           | Ligase activity                                 | -                                  | Enzyme: Ligase                     | Metabolism;Energy pathways                                       | -          | Yes                      |
| PQBPI       | 10084   | polyglutamine-binding protein 1 isoform 1                                           | NP_005701.1       | 5          | 1                 | 1          | 1      | 1                                                        | 1.17                                                     | 1.17                                                                                   | 1.17                                                                                   | 1.17                                                                                          | 1.17                                                                                          | 1                                                                              | 1                                                                              | 2354    | 10084          | polyglutamine binding protein 1                                                  | Transcription regulator activity                | Nucleus                            | Transcription regulator protein    | Regulation of nucleobase, nucleotide and nucleic acid metabolism | WW,NLS     | No                       |
| WBSR16      | 81554   | Williams-Beuren syndrome chromosome region 16 protein isoform 1                     | NP_110425.2       | 3          | 3                 | 3          | 4      | 1                                                        | 1.17                                                     | 3.38                                                                                   | 6.61                                                                                   | 5.9                                                                                           | 13.5                                                                                          | 3                                                                              | 3                                                                              | 15654   | 81554          | Williams-Beuren syndrome chromosome region 16                                    | Guanyl-nucleotide exchange factor activity      | -                                  | Guanine nucleotide exchange factor | Cell communication;Signal transduction                           | -          | Yes                      |
| RFTN1       | 23180   | raftlin                                                                             | NP_055965.1       | 1          | 3                 | 3          | 10     | 1                                                        | 1.16                                                     | 11.41                                                                                  | 4.66                                                                                   | 28.5                                                                                          | 13.3                                                                                          | 6                                                                              | 6                                                                              | 17950   | 23180          | None                                                                             | Molecular function unknown                      | Plasma membrane                    | Integral membrane protein          | Cell communication;Signal transduction                           | -          | Yes                      |
| PPP2R2A     | 5520    | serine/threonine-protein phosphatase 2A 55 kDa regulatory subunit B alpha isoform 2 | NP_001171062.1    | 15         | 8                 | 8          | 34     | 1                                                        | 1.15                                                     | 3.25                                                                                   | 4.61                                                                                   | 13.5                                                                                          | 22.2                                                                                          | 17                                                                             | 17                                                                             | 9223    | 5520           | protein phosphatase 2 (formerly 2A), regulatory subunit B (PR 52), alpha isoform | Protein serine/threonine phosphatase activity   | Cytoplasm                          | Serine/threonine phosphatase       | Cell communication;Signal transduction                           | -          | No                       |
| SPATA5      | 166378  | spermatogenesis-associated protein 5                                                | NP_660208.2       | 1          | 5                 | 6          | 9      | 1                                                        | 1.14                                                     | 7.49                                                                                   | 10.92                                                                                  | 16.9                                                                                          | 28.4                                                                                          | 5                                                                              | 5                                                                              | 11595   | 166378         | spermatogenesis associated 5                                                     | ATPase activity                                 | Mitochondrion                      | ATPase                             | Metabolism;Energy pathways                                       | AAA        | No                       |
| EIF2S3      | 1968    | eukaryotic translation initiation factor 2 subunit 3                                | NP_001406.1       | 1          | 16                | 16         | 55     | 1                                                        | 1.14                                                     | 3.48                                                                                   | 3.81                                                                                   | 19.3                                                                                          | 24.2                                                                                          | 30                                                                             | 30                                                                             | 2155    | 1968           | eukaryotic translation initiation factor 2, subunit 3 gamma, 52kDa               | Translation regulator activity                  | Cytoplasm                          | Translation regulator protein      | Protein metabolism                                               | -          | Yes                      |
| UTP15       | 84135   | U3 small nuclear RNA-associated protein 15 homolog isoform 1                        | NP_115551.2       | 3          | 4                 | 4          | 8      | 1                                                        | 1.13                                                     | 23.78                                                                                  | 4.03                                                                                   | 50.2                                                                                          | 9.1                                                                                           | 4                                                                              | 4                                                                              | 7796    | 84135          | None                                                                             | Molecular function unknown                      | -                                  | Unclassified                       | Cell communication                                               | WD40       | Yes                      |
| RSL1D1      | 26156   | ribosomal L1 domain-containing protein 1                                            | NP_056474.2       | 1          | 19                | 19         | 49     | 1                                                        | 1.13                                                     | 4.87                                                                                   | 4.02                                                                                   | 25.7                                                                                          | 23.9                                                                                          | 27                                                                             | 27                                                                             | 10897   | 26156          | ribosomal L1 domain containing 1                                                 | Molecular function unknown                      | Nucleolus                          | Unclassified                       | Biological processes unknown                                     | CC         | No                       |
| PTP4A1      | 7803    | protein tyrosine phosphatase type IVA 1                                             | NP_003454.1       | 4          | 2                 | 2          | 3      | 1                                                        | 1.13                                                     | 4.52                                                                                   | 8.55                                                                                   | 6.4                                                                                           | 13.7                                                                                          | 2                                                                              | 2                                                                              | 3349    | 7803           | protein tyrosine phosphatase type IVA, member 1                                  | Protein tyrosine phosphatase activity           | Nucleus                            | Tyrosine phosphatase               | Cell communication;Signal transduction                           | Tyr_Phosph | No                       |
| NUP98       | 4928    | nuclear pore complex protein Nup98-Nup96 isoform 1                                  | NP_057404.2       | 4          | 16                | 16         | 29     | 1                                                        | 1.13                                                     | 4.77                                                                                   | 4.07                                                                                   | 19.9                                                                                          | 19.1                                                                                          | 17                                                                             | 17                                                                             | 3012    | 4928           | nucleoporin 98kDa                                                                | Transporter activity                            | Nucleus;Nuclear membrane;Cytoplasm | Transport/cargo protein            | Transport                                                        | -          | Yes                      |
| CTBP1       | 1487    | C-terminal-binding protein 1 isoform 1                                              | NP_001319.1       | 2          | 6                 | 9          | 16     | 1                                                        | 1.13                                                     | 5.87                                                                                   | 9.72                                                                                   | 15.6                                                                                          | 29.8                                                                                          | 7                                                                              | 7                                                                              | 4015    | 1487           | C-terminal binding protein 1                                                     | Transcription regulator activity                | Nucleus                            | Transcription regulator protein    | Regulation of nucleobase, nucleotide and nucleic acid metabolism | 2HD        | Yes                      |
| MRPL24      | 79590   | 39S ribosomal protein L24, mitochondrial                                            | NP_663781.1       | 1          | 1                 | 1          | 2      | 1                                                        | 1.12                                                     | 1.12                                                                                   | 1.12                                                                                   | 1.12                                                                                          | 1.12                                                                                          | 1                                                                              | 1                                                                              | 14749   | 79590          | mitochondrial ribosomal protein L24                                              | Structural constituent of ribosome              | Mitochondrion                      | Ribosomal subunit                  | Protein metabolism                                               | KOW        | No                       |
| UPF3A       | 65110   | regulator of nonsense transcripts 3A isoform hUpf3p                                 | NP_075387.1       | 2          | 2                 | 2          | 4      | 1                                                        | 1.11                                                     | 2.58                                                                                   | 15.95                                                                                  | 3.7                                                                                           | 25.5                                                                                          | 2                                                                              | 2                                                                              | 9274    | 65110          | UPF3 regulator of nonsense transcripts homolog A (yeast)                         | RNA binding                                     | Nucleus                            | RNA binding protein                | Regulation of nucleobase, nucleotide and nucleic acid metabolism | CC,NLS;NES | Yes                      |
| TMEM209     | 84928   | transmembrane protein 209 isoform 1                                                 | NP_116231.2       | 2          | 2                 | 2          | 2      | 1                                                        | 1.11                                                     | 39.28                                                                                  | 49.77                                                                                  | 60.4                                                                                          | 91.7                                                                                          | 2                                                                              | 2                                                                              | 7871    | 84928          | None                                                                             | Molecular function unknown                      | -                                  | Integral membrane protein          | Biological processes unknown                                     | TM         | No                       |
| PHB         | 5245    | prohibitin isoform 1                                                                | NP_001268644.1    | 2          | 18                | 18         | 96     | 1                                                        | 1.1                                                      | 2.59                                                                                   | 2                                                                                      | 17.8                                                                                          | 15                                                                                            | 46                                                                             | 46                                                                             | 1454    | 5245           | prohibitin                                                                       | Receptor signaling complex scaffolding activity | Mitochondrion                      | Adapter molecule                   | Cell communication;Signal transduction                           | CC;PHB     | Yes                      |
| CMSS1       | 84319   | protein CMSS1 isoform 1                                                             | NP_115735.2       | 2          | 4                 | 4          | 5      | 1                                                        | 1.1                                                      | 9.69                                                                                   | 15.16                                                                                  | 13.8                                                                                          | 23.9                                                                                          | 2                                                                              | 2                                                                              |         |                |                                                                                  |                                                 |                                    |                                    |                                                                  |            |                          |
| GMPR2       | 51292   | GMP reductase 2 isoform 4                                                           | NP_001269951.1    | 5          | 7                 | 8          | 14     | 1                                                        | 1.1                                                      | 9.55                                                                                   | 11.38                                                                                  | 25.6                                                                                          | 34                                                                                            | 7                                                                              | 7                                                                              | 13590   | 51292          | guanosine monophosphate reductase 2                                              | Catalytic activity                              | Cytoplasm                          | Enzyme: Reductase                  | Metabolism                                                       | -          | Yes                      |
| NOL6        | 65083   | nucleolar protein 6 alpha isoform                                                   | NP_075068.2       | 2          | 11                | 11         | 17     | 1                                                        | 1.09                                                     | 8.74                                                                                   | 5.97                                                                                   | 29.7                                                                                          | 21.8                                                                                          | 11                                                                             | 11                                                                             | 14832   | 65083          | nucleolar protein family 6 (RNA-associated)                                      | RNA binding                                     | Nucleolus                          | RNA binding protein                | Regulation of nucleobase, nucleotide and nucleic acid metabolism | -          | No                       |

Supplementary Table S1. List of quantified proteins in OKF6/TERT1-Smoke cells  
 Raigopalani *et al.*, 2017. Role of protein kinase N2 (PKN2) in cigarette smoke-mediated oncogenic transformation of oral cells

| Gene Symbol | Gene ID | Protein Description                                                            | Protein Accession | # Proteins | # Unique Peptides | # Peptides | # PSMs | OKF6/TERT1-Smoke/<br>OKF6/TERT1-Parental<br>(130/126) R1 | OKF6/TERT1-Smoke/<br>OKF6/TERT1-Parental<br>(128/127) R2 | Ratio Standard Errors [%]:<br>OKF6/TERT1-Smoke/<br>OKF6/TERT1-Parental<br>(130/126) R1 | Ratio Standard Errors [%]:<br>OKF6/TERT1-Smoke/<br>OKF6/TERT1-Parental<br>(128/127) R2 | Ratio Variabilities [%]:<br>F13: OKF6/TERT1-<br>Smoke/<br>OKF6/TERT1-Parental<br>(130/126) R1 | Ratio Variabilities [%]:<br>F13: OKF6/TERT1-<br>Smoke/<br>OKF6/TERT1-Parental<br>(128/127) R2 | Ratio Counts: F13:<br>OKF6/TERT1-Smoke/<br>OKF6/TERT1-Parental<br>(130/126) R1 | Ratio Counts: F13:<br>OKF6/TERT1-Smoke/<br>OKF6/TERT1-Parental<br>(128/127) R2 | HPRD ID | Entrez Gene Id | Gene Name                                                                                     | Molecular Function                           | Primary Localization | Molecular Class                  | Biological Process                                                                                     | Domains          | Plasma Proteome Database |
|-------------|---------|--------------------------------------------------------------------------------|-------------------|------------|-------------------|------------|--------|----------------------------------------------------------|----------------------------------------------------------|----------------------------------------------------------------------------------------|----------------------------------------------------------------------------------------|-----------------------------------------------------------------------------------------------|-----------------------------------------------------------------------------------------------|--------------------------------------------------------------------------------|--------------------------------------------------------------------------------|---------|----------------|-----------------------------------------------------------------------------------------------|----------------------------------------------|----------------------|----------------------------------|--------------------------------------------------------------------------------------------------------|------------------|--------------------------|
| LGLALS8     | 3964    | galactin-8 isoform a                                                           | NP_963839.1       | 2          | 3                 | 3          | 5      | 1                                                        | 1.09                                                     | 2.18                                                                                   | 2.33                                                                                   | 3.8                                                                                           | 4.4                                                                                           | 3                                                                              | 3                                                                              | 9356    | 3964           | lectin, galactoside-binding, soluble; (8galactin 8)                                           | Carbohydrate binding                         | Cytoplasm            | Extracellular matrix protein     | Signal transduction                                                                                    | GLECT            | Yes                      |
| PTDSS1      | 9791    | phosphatidyserine synthase 1 isoform 1                                         | NP_055569.1       | 2          | 3                 | 3          | 7      | 1                                                        | 1.09                                                     | 12.03                                                                                  | 10.8                                                                                   | 24.4                                                                                          | 24                                                                                            | 4                                                                              | 4                                                                              | 17926   | 9791           | phosphatidylserine synthase 1                                                                 | Transferase activity                         | Mitochondrion        | Enzyme: Synthase                 | Metabolism;Energy pathways                                                                             | TM               | Yes                      |
| ATIC        | 471     | bifunctional purine biosynthesis protein PURH                                  | NP_004035.2       | 1          | 39                | 39         | 149    | 1                                                        | 1.09                                                     | 2.68                                                                                   | 4.27                                                                                   | 23                                                                                            | 41.2                                                                                          | 72                                                                             | 72                                                                             | 3434    | 471            | 5-aminoimidazole-4-carboxamide ribonucleotide/5-phosphoribosyl transferase/IMP cyclohydrolase | Hydrolase activity                           | -                    | Enzyme: Hydrolase                | Metabolism;Energy pathways                                                                             | -                | Yes                      |
| BRD2        | 6046    | bromodomain-containing protein 2 isoform 2                                     | NP_001186384.1    | 4          | 3                 | 4          | 4      | 1                                                        | 1.09                                                     | 0.53                                                                                   | 4.84                                                                                   | 0.9                                                                                           | 9.2                                                                                           | 3                                                                              | 3                                                                              | 3326    | 6046           | bromodomain containing 2                                                                      | Transcription regulator activity             | Nucleus              | Transcription regulatory protein | Regulation of nucleobase, nucleoside, nucleotide and nucleic acid metabolism                           | BROMO;CC;NLS     | Yes                      |
| MTRF1L      | 56181   | mitochondrial fission regulator 1-like isoform a                               | NP_062457.3       | 2          | 1                 | 1          | 1      | 1                                                        | 1.08                                                     |                                                                                        |                                                                                        |                                                                                               |                                                                                               | 1                                                                              | 1                                                                              |         |                |                                                                                               |                                              |                      |                                  |                                                                                                        |                  |                          |
| IGFBP2      | 10644   | insulin-like growth factor 2 mRNA-binding protein 2 isoform c                  | NP_001278798.1    | 7          | 19                | 21         | 83     | 1                                                        | 1.08                                                     | 2.51                                                                                   | 3.15                                                                                   | 14.4                                                                                          | 19.5                                                                                          | 32                                                                             | 32                                                                             | 10507   | 10644          | None                                                                                          | RNA binding;Translation regulator activity   | Cytoplasm            | RNA binding protein              | Regulation of nucleobase, nucleoside, nucleotide and nucleic acid metabolism;Regulation of translation | RRM;KH           | Yes                      |
| PXN         | 5829    | paxillin isoform 3                                                             | NP_001230685.1    | 4          | 9                 | 9          | 22     | 1                                                        | 1.08                                                     | 4.49                                                                                   | 10.61                                                                                  | 15                                                                                            | 39.4                                                                                          | 11                                                                             | 11                                                                             | 3937    | 5829           | paxillin                                                                                      | Cell adhesion molecule activity              | Focal adhesion       | Cytoskeletal associated protein  | Signal transduction                                                                                    | LIM              | No                       |
| GPS1        | 2873    | COP9 signalosome complex subunit 1 isoform 1                                   | NP_997657.1       | 2          | 12                | 12         | 31     | 1                                                        | 1.07                                                     | 9.27                                                                                   | 2.39                                                                                   | 38.5                                                                                          | 10.2                                                                                          | 16                                                                             | 16                                                                             | 15991   | 2873           | G protein pathway suppressor 1                                                                | Signal transducer activity                   | Nucleus              | Unclassified                     | Cell communication;Signal transduction                                                                 | PINT             | Yes                      |
| MRPS27      | 23107   | 28S ribosomal protein S27, mitochondrial isoform 1                             | NP_001273677.1    | 3          | 9                 | 9          | 25     | 1                                                        | 1.06                                                     | 6.88                                                                                   | 6.05                                                                                   | 26.3                                                                                          | 24.3                                                                                          | 14                                                                             | 14                                                                             | 17596   | 23107          | mitochondrial ribosomal protein S27                                                           | Structural constituent of ribosome           | Mitochondrion        | Ribosomal subunit                | Protein metabolism                                                                                     | CC               | Yes                      |
| ACOX1       | 51      | peroxisomal acyl-coenzyme A oxidase 1 isoform a                                | NP_004026.2       | 3          | 5                 | 5          | 10     | 1                                                        | 1.05                                                     | 15.03                                                                                  | 9.09                                                                                   | 34.6                                                                                          | 21.7                                                                                          | 5                                                                              | 5                                                                              | 2030    | 51             | acyl-Coenzyme A oxidase 1, (palmitoyl)                                                        | Catalytic activity                           | Peroxisome;Nucleus   | Enzyme: Oxidase                  | Metabolism;Energy pathways                                                                             | -                | Yes                      |
| FNBP1L      | 54874   | formin-binding protein 1-like isoform 3                                        | NP_001157945.1    | 3          | 1                 | 1          | 2      | 1                                                        | 1.05                                                     |                                                                                        |                                                                                        |                                                                                               |                                                                                               | 1                                                                              | 1                                                                              | 12317   | 54874          | formin binding protein 1-like                                                                 | Cytoskeletal protein binding                 | Microtubule          | Cytoskeletal protein             | Signal transduction                                                                                    | FCH;CC;SH3       | No                       |
| PBXIP1      | 57326   | pre-B-cell leukemia transcription factor-interacting protein 1                 | NP_065385.2       | 1          | 8                 | 8          | 12     | 1                                                        | 1.04                                                     | 7.65                                                                                   | 16.58                                                                                  | 19                                                                                            | 44.3                                                                                          | 6                                                                              | 6                                                                              | 17823   | 57326          | pre-B-cell leukemia transcription factor-interacting protein 1                                | Transcription regulator activity             | Cytoplasm            | Transcription regulatory protein | Regulation of nucleobase, nucleoside, nucleotide and nucleic acid metabolism                           | CC;NLS           | No                       |
| AAAS        | 8086    | aladin isoform 1                                                               | NP_056480.1       | 2          | 7                 | 7          | 16     | 1                                                        | 1.04                                                     | 5.89                                                                                   | 12.51                                                                                  | 17.8                                                                                          | 40.4                                                                                          | 9                                                                              | 9                                                                              | 5646    | 8086           | achalasia, adrenocortical insufficiency, alarimia (Allgrove, triple-A)                        | Molecular function unknown                   | Peroxisome           | Unclassified                     | Cell communication;Signal transduction                                                                 | WD40;SP          | No                       |
| PDE4DIP     | 9659    | myomegalin isoform 8                                                           | NP_001185761.2    | 7          | 3                 | 3          | 5      | 1                                                        | 1.03                                                     | 7.52                                                                                   | 2.88                                                                                   | 13.1                                                                                          | 5.1                                                                                           | 3                                                                              | 3                                                                              | 10482   | 9659           | phosphodiesterase 4D interacting protein(myomegalin)                                          | Transporter activity                         | Golgi apparatus      | Transport;cargo protein          | Transport                                                                                              | DSH;CC           | Yes                      |
| MSH6        | 2956    | DNA mismatch repair protein Msh6 isoform 1                                     | NP_000170.1       | 3          | 12                | 12         | 19     | 1                                                        | 1.03                                                     | 3                                                                                      | 13.08                                                                                  | 10                                                                                            | 46.8                                                                                          | 11                                                                             | 11                                                                             | 7202    | 2956           | mutS homolog 6 (E. coli)                                                                      | DNA binding                                  | Nucleus              | DNA repair protein               | DNA repair                                                                                             | PWWP;MUTSd;MUTSs | Yes                      |
| RPL6        | 6128    | 60S ribosomal protein L6                                                       | NP_000961.2       | 1          | 16                | 16         | 88     | 1                                                        | 1.02                                                     | 2.24                                                                                   | 4                                                                                      | 14.4                                                                                          | 27                                                                                            | 41                                                                             | 42                                                                             | 4745    | 6128           | ribosomal protein L6                                                                          | Structural constituent of ribosome           | Nucleolus            | Ribosomal subunit                | Protein metabolism                                                                                     | -                | Yes                      |
| RAD50       | 10111   | DNA repair protein RAD50                                                       | NP_005723.2       | 1          | 18                | 18         | 41     | 1                                                        | 1.02                                                     | 4.82                                                                                   | 5.8                                                                                    | 21.9                                                                                          | 26.9                                                                                          | 20                                                                             | 20                                                                             | 4950    | 10111          | RAD50 homolog (S. cerevisiae)                                                                 | DNA binding                                  | Nucleus              | DNA binding protein              | Regulation of nucleobase, nucleoside, nucleotide and nucleic acid metabolism                           | CC               | Yes                      |
| HNRNPF      | 3185    | heterogeneous nuclear ribonucleoprotein F                                      | NP_004957.1       | 1          | 6                 | 8          | 51     | 1                                                        | 1.01                                                     | 4.38                                                                                   | 5.61                                                                                   | 14.7                                                                                          | 19                                                                                            | 11                                                                             | 11                                                                             | 3023    | 3185           | heterogeneous nuclear ribonucleoprotein F                                                     | Ribonucleoprotein                            | Nucleus              | Ribonucleoprotein                | Regulation of nucleobase, nucleoside, nucleotide and nucleic acid metabolism                           | RRM              | Yes                      |
| GTPBP10     | 85865   | GTP-binding protein 10 isoform 2                                               | NP_149098.2       | 2          | 3                 | 3          | 5      | 1                                                        | 1.01                                                     | 10.82                                                                                  | 15.45                                                                                  | 22                                                                                            | 31.8                                                                                          | 4                                                                              | 4                                                                              | 14262   | 85865          | None                                                                                          | RNA binding                                  | Nucleus              | RNA binding protein              | Regulation of nucleobase, nucleoside, nucleotide and nucleic acid metabolism                           | -                | No                       |
| ELAC2       | 60528   | zinc phosphodiesterase ELAC protein 2 isoform 1                                | NP_060597.4       | 3          | 13                | 13         | 26     | 1                                                        | 1.01                                                     | 9.06                                                                                   | 5.56                                                                                   | 33.5                                                                                          | 20.5                                                                                          | 13                                                                             | 13                                                                             | 5641    | 60528          | elac homolog 2 (E. coli)                                                                      | Molecular function unknown                   | Nucleus              | Unclassified                     | Biological process unknown                                                                             | -                | Yes                      |
| LMO7        | 4008    | LIM domain only protein 7 isoform 3                                            | NP_001293009.1    | 3          | 2                 | 2          | 3      | 1                                                        | 1                                                        |                                                                                        |                                                                                        |                                                                                               |                                                                                               | 1                                                                              | 1                                                                              | 5078    | 4008           | LIM domain 7                                                                                  | Transcription regulator activity             | Nucleus              | Transcription regulatory protein | Regulation of nucleobase, nucleoside, nucleotide and nucleic acid metabolism                           | CH;CC;PDZ;LIM    | Yes                      |
| MTHFD1L     | 25902   | monofunctional C1-tetrahydrofolate synthase, mitochondrial isoform 1 precursor | NP_001229696.1    | 10         | 15                | 15         | 29     | 1                                                        | 1                                                        | 3.88                                                                                   | 6.43                                                                                   | 16                                                                                            | 27                                                                                            | 17                                                                             | 17                                                                             | 9967    | 25902          | methylene tetrahydrofolate dehydrogenase(NADP-dependent) 1-like                               | Catalytic activity                           | Mitochondrion        | Enzyme: Ligase                   | Metabolism                                                                                             | SP               | No                       |
| BAIAP2      | 10458   | brain-specific angiogenesis inhibitor 1-associated protein 2 isoform 2         | NP_059345.1       | 4          | 7                 | 7          | 15     | 1                                                        | 1                                                        | 17.36                                                                                  | 8.17                                                                                   | 55.7                                                                                          | 24.9                                                                                          | 9                                                                              | 9                                                                              | 5686    | 10458          | BAI1-associated protein 2                                                                     | Receptor signaling complex scaffold activity | Cytoplasm            | Adapter molecule                 | Cell communication;Signal transduction                                                                 | CC;SH3           | Yes                      |
| RANBP2      | 5903    | E3 SUMO-protein ligase RanBP2                                                  | NP_006258.3       | 14         | 52                | 54         | 112    | 1                                                        | 0.99                                                     | 1.63                                                                                   | 2.3                                                                                    | 12.7                                                                                          | 17.8                                                                                          | 60                                                                             | 60                                                                             | 3111    | 5903           | RAN binding protein 2                                                                         | Transporter activity                         | Nucleus              | Transport;cargo protein          | Cell communication;Signal transduction                                                                 | TPR;ZnF;RBC;C    | Yes                      |

Supplementary Table S1. List of quantified proteins in OKF6/TERT1-Smoke cells  
 Raingonalan *et al.*, 2017. Role of protein kinase N2 (PKN2) in cigarette smoke-mediated oncogenic transformation of oral cells

| Gene Symbol | Gene ID | Protein Description                                                                           | Protein Accession | # Proteins | # Unique Peptides | # Peptides | # PSMs | OKF6/TERT1-Smoke/<br>OKF6/TERT1-Parental<br>(130/126) R1 | OKF6/TERT1-Smoke/<br>OKF6/TERT1-Parental<br>(128/127) R2 | Ratio Standard Errors [%]:<br>OKF6/TERT1-Smoke/<br>OKF6/TERT1-Parental<br>(130/126) R1 | Ratio Standard Errors [%]:<br>OKF6/TERT1-Smoke/<br>OKF6/TERT1-Parental<br>(128/127) R2 | Ratio Variabilities [%]:<br>F13: OKF6/TERT1-<br>Smoke/<br>OKF6/TERT1-Parental<br>(130/126) R1 | Ratio Variabilities [%]:<br>F13: OKF6/TERT1-<br>Smoke/<br>OKF6/TERT1-Parental<br>(128/127) R2 | Ratio Counts: F13:<br>OKF6/TERT1-Smoke/<br>OKF6/TERT1-Parental<br>(130/126) R1 | Ratio Counts: F13:<br>OKF6/TERT1-Smoke/<br>OKF6/TERT1-Parental<br>(128/127) R2 | HPRD ID | Entrez Gene Id | Gene Name                                                            | Molecular Function                                                        | Primary Localization                    | Molecular Class                     | Biological Process                                                                   | Domains        | Plasma Proteome Database |
|-------------|---------|-----------------------------------------------------------------------------------------------|-------------------|------------|-------------------|------------|--------|----------------------------------------------------------|----------------------------------------------------------|----------------------------------------------------------------------------------------|----------------------------------------------------------------------------------------|-----------------------------------------------------------------------------------------------|-----------------------------------------------------------------------------------------------|--------------------------------------------------------------------------------|--------------------------------------------------------------------------------|---------|----------------|----------------------------------------------------------------------|---------------------------------------------------------------------------|-----------------------------------------|-------------------------------------|--------------------------------------------------------------------------------------|----------------|--------------------------|
| WDR48       | 57599   | WD repeat-containing protein 48 isoform 1                                                     | NP_065890.1       | 1          | 2                 | 2          | 3      | 1                                                        | 0.98                                                     |                                                                                        |                                                                                        |                                                                                               |                                                                                               | 1                                                                              |                                                                                | 11146   | 57599          | WD repeat domain 48                                                  | Molecular function unknown                                                | Endosome                                | Unclassified                        | Cell communication;Signal transduction                                               | WD40           | Yes                      |
| AP5Z1       | 9907    | AP-5 complex subunit zeta-1                                                                   | NP_055670.1       | 1          | 2                 | 2          | 3      | 1                                                        | 0.98                                                     |                                                                                        |                                                                                        |                                                                                               |                                                                                               | 1                                                                              |                                                                                |         |                |                                                                      |                                                                           |                                         |                                     |                                                                                      |                |                          |
| HERPUD2     | 64224   | homocysteine responsive endoplasmic reticulum-resident ubiquitin-like domain member 2 protein | NP_071768.3       | 1          | 1                 | 1          | 1      | 1                                                        | 0.97                                                     |                                                                                        |                                                                                        |                                                                                               |                                                                                               | 1                                                                              |                                                                                | 7984    | 64224          | None                                                                 | Molecular function unknown                                                | -                                       | Unclassified                        | Biological process unknown                                                           | UBQ;TM         | No                       |
| URB2        | 9816    | unhealthy ribosome biogenesis protein 2 homolog                                               | NP_055592.2       | 1          | 3                 | 3          | 5      | 1                                                        | 0.97                                                     | 14.64                                                                                  | 6.12                                                                                   | 21                                                                                            | 8.4                                                                                           | 2                                                                              | 2                                                                              | 17178   | 9816           | KIAA0133                                                             | Molecular function unknown                                                | Nucleus                                 | Unclassified                        | Biological process unknown                                                           | -              | Yes                      |
| ASPH        | 444     | aspartylasparaginyl beta-hydroxylase isoform a                                                | NP_004309.2       | 12         | 23                | 24         | 83     | 1                                                        | 0.97                                                     | 4.26                                                                                   | 4.18                                                                                   | 26.6                                                                                          | 25.3                                                                                          | 38                                                                             | 38                                                                             | 8996    | 444            | aspartate beta-Hydroxylase                                           | Catalytic activity                                                        | Endoplasmic reticulum                   | Enzyme: Hydroxylase                 | Protein metabolism                                                                   | TM;CC          | Yes                      |
| PSMD8       | 5714    | 26S proteasome non-ATPase regulatory subunit 8                                                | NP_002803.2       | 1          | 7                 | 7          | 31     | 1                                                        | 0.95                                                     | 2.31                                                                                   | 6.76                                                                                   | 7.7                                                                                           | 21.4                                                                                          | 11                                                                             | 11                                                                             | 10171   | 5714           | proteasome (prosome, munc80p1) 26S subunit, non-ATPase, 8            | Ubiquitin-specific protease activity                                      | Cytoplasm                               | Ubiquitin proteasome system protein | Protein metabolism                                                                   | -              | Yes                      |
| MRPL20      | 55052   | 39S ribosomal protein L20, mitochondrial                                                      | NP_060441.2       | 1          | 3                 | 3          | 8      | 1                                                        | 0.95                                                     | 3.46                                                                                   | 4.52                                                                                   | 6.9                                                                                           | 8.6                                                                                           | 4                                                                              | 4                                                                              | 14746   | 55052          | mitochondrial ribosomal protein L20                                  | Structural constituent of ribosome                                        | Mitochondrion                           | Ribosomal subunit                   | Protein metabolism                                                                   | -              | No                       |
| PPP2CB      | 5516    | serine/threonine-protein phosphatase 2A catalytic subunit beta isoform                        | NP_001009552.1    | 1          | 1                 | 12         | 43     | 1                                                        | 0.94                                                     |                                                                                        |                                                                                        |                                                                                               |                                                                                               | 1                                                                              |                                                                                | 1487    | 5516           | protein phosphatase 2 (formerly 2A), catalytic subunit, beta isoform | Protein serine/threonine phosphatase activity                             | Cytoplasm                               | Serine/threonine phosphatase        | Cell communication;Signal transduction                                               | CC;PP2A        | Yes                      |
| ANAPC7      | 51434   | anaphase-promoting complex subunit 7 isoform a                                                | NP_057322.2       | 2          | 3                 | 3          | 4      | 1                                                        | 0.94                                                     | 0.62                                                                                   | 2.99                                                                                   | 0.9                                                                                           | 4                                                                                             | 2                                                                              | 2                                                                              | 16233   | 51434          | anaphase promoting complex subunit 7                                 | Protein binding                                                           | Cytoplasm                               | Cell cycle control protein          | Cell communication;Signal transduction                                               | TPR            | Yes                      |
| PRPF4B      | 8899    | serine/threonine-protein kinase PRP4 homolog                                                  | NP_003904.3       | 1          | 11                | 11         | 20     | 1                                                        | 0.94                                                     | 6.75                                                                                   | 6.61                                                                                   | 21.5                                                                                          | 19.8                                                                                          | 10                                                                             | 10                                                                             | 9087    | 8899           | PRP4 pre-mRNA processing factor 4 homolog B(yeast)                   | Transcription regulator activity;Protein serine/threonine kinase activity | Nucleus                                 | Serine/threonine kinase             | Regulation of nucleoside, nucleotide and nucleic acid metabolism;Signal transduction | CC;S_T_kinase  | Yes                      |
| THOC2       | 57187   | THO complex subunit 2                                                                         | NP_001075019.1    | 1          | 6                 | 6          | 9      | 1                                                        | 0.94                                                     | 11.3                                                                                   | 8.26                                                                                   | 25.7                                                                                          | 17.5                                                                                          | 5                                                                              | 5                                                                              | 2517    | 57187          | THO complex 2                                                        | Transcription factor activity                                             | Nucleus                                 | Transcription factor                | Regulation of nucleoside, nucleotide and nucleic acid metabolism                     | CC             | Yes                      |
| OSBPL9      | 114883  | oxysterol-binding protein-related protein 9 isoform f                                         | NP_683707.3       | 6          | 5                 | 5          | 10     | 1                                                        | 0.93                                                     | 6.31                                                                                   | 4.12                                                                                   | 16.8                                                                                          | 10.1                                                                                          | 7                                                                              | 7                                                                              | 9479    | 114883         | oxysterol binding protein-like 9                                     | Transporter activity                                                      | Cytoplasm;Nucleus                       | Transport/cargo protein             | Transport                                                                            | PH;CC          | Yes                      |
| RPL5        | 6125    | 60S ribosomal protein L5                                                                      | NP_000960.2       | 1          | 21                | 21         | 97     | 1                                                        | 0.92                                                     | 4.29                                                                                   | 5.55                                                                                   | 31                                                                                            | 37.4                                                                                          | 50                                                                             | 50                                                                             | 4699    | 6125           | ribosomal protein L5                                                 | Structural constituent of ribosome                                        | Ribosome                                | Ribosomal subunit                   | Protein metabolism                                                                   | NLS;NES        | Yes                      |
| COLGALT1    | 79709   | procollagen galactosyltransferase 1 precursor                                                 | NP_078932.2       | 4          | 19                | 19         | 48     | 1                                                        | 0.91                                                     | 3.78                                                                                   | 6.14                                                                                   | 19.5                                                                                          | 29                                                                                            | 26                                                                             | 26                                                                             |         |                |                                                                      |                                                                           |                                         |                                     |                                                                                      |                |                          |
| FRMD8       | 83786   | FERM domain-containing protein 8 isoform 1                                                    | NP_114110.1       | 3          | 3                 | 3          | 5      | 1                                                        | 0.91                                                     | 18.36                                                                                  | 15.84                                                                                  | 32.5                                                                                          | 25.3                                                                                          | 3                                                                              | 3                                                                              | 13326   | 83786          | None                                                                 | Cytoskeletal protein binding                                              | -                                       | Cytoskeletal associated protein     | Cell growth and/or maintenance                                                       | B41            | No                       |
| DHX36       | 170506  | ATP-dependent RNA helicase DHX36 isoform 1                                                    | NP_065916.2       | 2          | 7                 | 8          | 21     | 1                                                        | 0.9                                                      | 8.73                                                                                   | 8.6                                                                                    | 28.1                                                                                          | 24.8                                                                                          | 10                                                                             | 10                                                                             | 9918    | 170506         | DEAH (Asp-Glu-Ala-His) box polypeptide 36                            | RNA binding                                                               | Plasma membrane                         | RNA binding protein                 | Regulation of nucleoside, nucleotide and nucleic acid metabolism                     | DEXDc;HELIC;TM | No                       |
| ZAK         | 51776   | mitogen-activated protein kinase kinase kinase MLT isoform 2                                  | NP_598407.1       | 1          | 1                 | 4          | 7      | 1                                                        | 0.9                                                      |                                                                                        |                                                                                        |                                                                                               |                                                                                               | 1                                                                              | 1                                                                              |         |                |                                                                      |                                                                           |                                         |                                     |                                                                                      |                |                          |
| PIP4K2C     | 79837   | phosphatidylinositol 5-phosphate 4-kinase type-2 gamma isoform a                              | NP_079055.3       | 3          | 8                 | 8          | 14     | 1                                                        | 0.9                                                      | 9.33                                                                                   | 5.58                                                                                   | 27                                                                                            | 14.2                                                                                          | 8                                                                              | 8                                                                              | 15138   | 79837          | phosphatidylinositol 4-kinase, type II, gamma                        | Lipid kinase activity                                                     | -                                       | Lipid Kinase                        | Cell communication;Signal transduction                                               | PIP3c          | No                       |
| HDAC3       | 8841    | histone deacetylase 3                                                                         | NP_003874.2       | 1          | 1                 | 2          | 3      | 1                                                        | 0.9                                                      |                                                                                        |                                                                                        |                                                                                               |                                                                                               | 1                                                                              | 1                                                                              | 8950    | 8841           | histone deacetylase 3                                                | Transcription regulator activity                                          | Nucleus                                 | Transcription regulatory protein    | Regulation of nucleoside, nucleotide and nucleic acid metabolism                     | NES;NLS        | Yes                      |
| AMPD2       | 271     | AMP deaminase 2 isoform 1                                                                     | NP_004028.3       | 5          | 5                 | 5          | 9      | 1                                                        | 0.89                                                     | 7.84                                                                                   | 7.49                                                                                   | 19.3                                                                                          | 16.4                                                                                          | 6                                                                              | 6                                                                              | 11808   | 271            | adenosine monophosphate deaminase 2 (isoform L)                      | Deaminase activity                                                        | Cytoplasm;Nucleus                       | Enzyme: Deaminase                   | Metabolism;Energy pathways                                                           | SP             | Yes                      |
| CCDC167     | 154467  | coiled-coil domain-containing protein 167                                                     | NP_612502.1       | 1          | 1                 | 1          | 1      | 1                                                        | 0.88                                                     |                                                                                        |                                                                                        |                                                                                               |                                                                                               | 1                                                                              | 1                                                                              |         |                |                                                                      |                                                                           |                                         |                                     |                                                                                      |                |                          |
| MCU         | 90550   | calcium uniporter protein, mitochondrial isoform 1 precursor                                  | NP_612366.1       | 3          | 4                 | 4          | 10     | 1                                                        | 0.88                                                     | 3.68                                                                                   | 11.62                                                                                  | 9                                                                                             | 25.4                                                                                          | 6                                                                              | 6                                                                              |         |                |                                                                      |                                                                           |                                         |                                     |                                                                                      |                |                          |
| RER1        | 11079   | protein RER1                                                                                  | NP_008964.3       | 1          | 1                 | 1          | 2      | 1                                                        | 0.88                                                     |                                                                                        |                                                                                        |                                                                                               |                                                                                               | 1                                                                              | 1                                                                              | 17967   | 11079          | RER1 retention in endoplasmic reticulum homolog (S. cerevisiae)      | Molecular function unknown                                                | Golgi apparatus                         | Integral membrane protein           | Biological process unknown                                                           | TM             | No                       |
| PTRH2       | 51651   | peptidyl-rRNA hydrolase 2, mitochondrial isoform a                                            | NP_001015509.1    | 2          | 5                 | 5          | 12     | 1                                                        | 0.87                                                     | 12.54                                                                                  | 8.74                                                                                   | 34.2                                                                                          | 20.4                                                                                          | 7                                                                              | 7                                                                              | 12273   | 51651          | None                                                                 | Hydrolase activity                                                        | Mitochondrion                           | Enzyme: Hydrolase                   | Apoptosis                                                                            | TM             | Yes                      |
| MRPS17      | 51373   | 28S ribosomal protein S17, mitochondrial                                                      | NP_057053.1       | 1          | 5                 | 5          | 10     | 1                                                        | 0.87                                                     | 11.37                                                                                  | 5.63                                                                                   | 28.5                                                                                          | 12                                                                                            | 6                                                                              | 6                                                                              | 14779   | 51373          | mitochondrial ribosomal protein S17                                  | Structural constituent of ribosome                                        | Mitochondrion                           | Ribosomal subunit                   | Protein metabolism                                                                   | -              | Yes                      |
| FAM120A     | 23196   | constitutive coactivator of PPAR-gamma-like protein 1 isoform a                               | NP_055427.2       | 7          | 29                | 29         | 70     | 1                                                        | 0.87                                                     | 3.16                                                                                   | 3.02                                                                                   | 20.2                                                                                          | 16.8                                                                                          | 40                                                                             | 40                                                                             | 12928   | 23196          | chromosome 9 open reading frame 10                                   | Molecular function unknown                                                | Nucleus                                 | Unclassified                        | Biological process unknown                                                           | -              | Yes                      |
| KTN1        | 3895    | kinectin isoform a                                                                            | NP_001072989.1    | 4          | 43                | 43         | 115    | 1                                                        | 0.87                                                     | 2.05                                                                                   | 3.15                                                                                   | 16.7                                                                                          | 22.4                                                                                          | 65                                                                             | 65                                                                             | 2661    | 3895           | kinectin 1 (kinesin receptor)                                        | Cytoskeletal anchoring activity                                           | Endoplasmic reticulum;Nucleus;Cytoplasm | Anchor protein                      | Cell growth and/or maintenance                                                       | TM;CC          | Yes                      |
| POLR1B      | 84172   | DNA-directed RNA polymerase 1 subunit RPA2 isoform 3                                          | NP_001269701.1    | 3          | 1                 | 1          | 2      | 1                                                        | 0.86                                                     |                                                                                        |                                                                                        |                                                                                               |                                                                                               | 1                                                                              | 1                                                                              | 6852    | 84172          | polymerase (RNA) I polypeptide B, 128kDa                             | DNA-directed RNA polymerase activity                                      | Nucleus                                 | RNA polymerase                      | Regulation of nucleoside, nucleotide and nucleic acid metabolism                     | PHD            | Yes                      |

Supplementary Table S1. List of quantified proteins in OKF6/TERT1-Smoke cells  
 Raingopaln *et al.*, 2017, Role of protein kinase N2 (PKN2) in cigarette smoke-mediated oncogenic transformation of oral cells

| Gene Symbol | Gene ID | Protein Description                                                         | Protein Accession | # Proteins | # Unique Peptides | # Peptides | # PSMs | OKF6/TERT1-Smoke/<br>OKF6/TERT1-Parental<br>(130/126) R1 | OKF6/TERT1-Smoke/<br>OKF6/TERT1-Parental<br>(128/127) R2 | Ratio Standard Errors [%]:<br>OKF6/TERT1-Smoke/<br>OKF6/TERT1-Parental<br>(130/126) R1 | Ratio Standard Errors [%]:<br>OKF6/TERT1-Smoke/<br>OKF6/TERT1-Parental<br>(128/127) R2 | Ratio Variabilities [%]:<br>F13: OKF6/TERT1-<br>Smoke/<br>OKF6/TERT1-Parental<br>(130/126) R1 | Ratio Variabilities [%]:<br>F13: OKF6/TERT1-<br>Smoke/<br>OKF6/TERT1-Parental<br>(128/127) R2 | Ratio Counts: F13:<br>OKF6/TERT1-Smoke/<br>OKF6/TERT1-Parental<br>(130/126) R1 | Ratio Counts: F13:<br>OKF6/TERT1-Smoke/<br>OKF6/TERT1-Parental<br>(128/127) R2 | HPRD ID | Entrez Gene ID | Gene Name                                                                      | Molecular Function                       | Primary Localization              | Molecular Class                 | Biological Process                                                           | Domains            | Plasma Proteome Database |
|-------------|---------|-----------------------------------------------------------------------------|-------------------|------------|-------------------|------------|--------|----------------------------------------------------------|----------------------------------------------------------|----------------------------------------------------------------------------------------|----------------------------------------------------------------------------------------|-----------------------------------------------------------------------------------------------|-----------------------------------------------------------------------------------------------|--------------------------------------------------------------------------------|--------------------------------------------------------------------------------|---------|----------------|--------------------------------------------------------------------------------|------------------------------------------|-----------------------------------|---------------------------------|------------------------------------------------------------------------------|--------------------|--------------------------|
| SIRT6       | 51548   | NAD-dependent protein deacetylase sirtuin-6 isoform 1                       | NP_057623.2       | 2          | 1                 | 1          | 1      | 1                                                        | 0.86                                                     |                                                                                        |                                                                                        |                                                                                               |                                                                                               | 1                                                                              | 1                                                                              | 12093   | 51548          | sirtuin (silent mating type information regulator 2 homolog) 6 (S. cerevisiae) | Deacetylase activity                     | Nucleus                           | Enzyme: Deacetylase             | Regulation of nucleobase, nucleoside, nucleotide and nucleic acid metabolism | -                  | Yes                      |
| SAR1A       | 56681   | GTP-binding protein SAR1a                                                   | NP_064535.1       | 1          | 5                 | 9          | 51     | 1                                                        | 0.84                                                     | 11.84                                                                                  | 17.33                                                                                  | 38.7                                                                                          | 46.1                                                                                          | 10                                                                             | 9                                                                              | 7608    | 56681          | SAR1a gene homolog 1 (S. cerevisiae)                                           | GTPase activity                          | Endoplasmic reticulum             | GTPase                          | Cell communication; Signal transduction                                      | -                  | Yes                      |
| PUF60       | 22827   | poly(U)-binding-splicing factor PUF60 isoform b                             | NP_055096.2       | 4          | 1                 | 14         | 64     | 1                                                        | 0.84                                                     |                                                                                        |                                                                                        |                                                                                               |                                                                                               | 1                                                                              | 1                                                                              | 18051   | 22827          | None                                                                           | RNA binding                              | Nucleus                           | RNA binding protein             | Regulation of nucleobase, nucleoside, nucleotide and nucleic acid metabolism | RRM                | Yes                      |
| PRKACA      | 5566    | cAMP-dependent protein kinase catalytic subunit alpha isoform 3             | NP_001291278.1    | 5          | 1                 | 6          | 8      | 1                                                        | 0.84                                                     |                                                                                        |                                                                                        |                                                                                               |                                                                                               | 1                                                                              | 1                                                                              | 3382    | 5566           | protein kinase, cAMP-dependent, catalytic, alpha                               | Protein serine/threonine kinase activity | Golgi apparatus;Nucleus;Cytoplasm | Serine/threonine kinase         | Signal transduction                                                          | S_T_kinase         | Yes                      |
| MUT         | 4594    | methylmalonyl-CoA mutase, mitochondrial precursor                           | NP_000246.2       | 1          | 10                | 10         | 23     | 1                                                        | 0.8                                                      | 5.59                                                                                   | 3.51                                                                                   | 17.9                                                                                          | 8.9                                                                                           | 10                                                                             | 10                                                                             | 2014    | 4594           | methylmalonyl Coenzyme A mutase                                                | Catalytic activity                       | Mitochondrion                     | Enzyme: Mutase                  | Metabolism;Energy pathways                                                   | -                  | Yes                      |
| LACTB       | 114294  | serine beta-lactamase-like protein LACTB, mitochondrial isoform a precursor | NP_116246.2       | 3          | 5                 | 5          | 8      | 1                                                        | 0.8                                                      | 11.88                                                                                  | 3.59                                                                                   | 26.9                                                                                          | 6.4                                                                                           | 5                                                                              | 5                                                                              | 7466    | 114294         | lactamase, beta                                                                | Structural constituent of ribosome       | Mitochondrion;Cytoplasm           | Ribosomal subunit               | Protein metabolism                                                           | TM                 | Yes                      |
| TRMT61B     | 55006   | tRNA (adenine(58)-N(1))-methyltransferase, mitochondrial precursor          | NP_060380.3       | 1          | 2                 | 2          | 3      | 1                                                        | 0.79                                                     | 16.94                                                                                  | 52.9                                                                                   | 24.2                                                                                          | 64.5                                                                                          | 2                                                                              | 2                                                                              | 7935    | 55006          | None                                                                           | Methyltransferase activity               | -                                 | Enzyme: Methyltransferase       | Metabolism;Energy pathways                                                   | SP                 | No                       |
| XPC         | 7508    | DNA repair protein complementing XP-C cells                                 | NP_004619.3       | 1          | 2                 | 2          | 3      | 1                                                        | 0.79                                                     | 0.8                                                                                    | 23.17                                                                                  | 1.1                                                                                           | 26.4                                                                                          | 2                                                                              | 2                                                                              | 2046    | 7508           | xeroderma pigmentosum, complementation group C                                 | DNA repair protein                       | Nucleus                           | DNA binding protein             | DNA repair                                                                   | -                  | Yes                      |
| EMD         | 2010    | emerin                                                                      | NP_000108.1       | 1          | 8                 | 8          | 21     | 1                                                        | 0.77                                                     | 6.11                                                                                   | 9.42                                                                                   | 23.2                                                                                          | 27.5                                                                                          | 14                                                                             | 14                                                                             | 2309    | 2010           | emerin (Emery-Dreifuss muscular dystrophy)                                     | Structural molecule activity             | Nucleus                           | Structural protein              | Cell growth and/or maintenance                                               | TM                 | No                       |
| BLVRB       | 645     | flavin reductase (NADPH)                                                    | NP_000704.1       | 1          | 4                 | 4          | 7      | 1                                                        | 0.76                                                     | 8.56                                                                                   | 25.68                                                                                  | 17.3                                                                                          | 40.5                                                                                          | 4                                                                              | 4                                                                              | 2967    | 645            | biliverdin reductase B (flavin reductase(NADPH))                               | Oxidoreductase activity                  | Cytoplasm                         | Enzyme: Oxidoreductase          | Metabolism;Energy pathways                                                   | -                  | Yes                      |
| HIST1H4B    | 8366    | histone H4                                                                  | NP_003535.1       | 1          | 12                | 12         | 365    | 1                                                        | 0.76                                                     | 3.29                                                                                   | 2.57                                                                                   | 48.2                                                                                          | 27.6                                                                                          | 194                                                                            | 194                                                                            | 11920   | 8366           | histone 1, H4b                                                                 | DNA binding                              | Nucleus                           | DNA binding protein             | Regulation of nucleobase, nucleoside, nucleotide and nucleic acid metabolism | -                  | Yes                      |
| DAG1        | 1605    | dystroglycan prepropeptide                                                  | NP_001171114.1    | 1          | 2                 | 2          | 3      | 1                                                        | 0.75                                                     |                                                                                        |                                                                                        |                                                                                               |                                                                                               | 1                                                                              | 1                                                                              | 546     | 1605           | dystroglycan 1 (dystrophin-associated glycoprotein 1)                          | Cell adhesion molecule activity          | Plasma membrane                   | Adhesion molecule               | Cell communication; Signal transduction                                      | TM,SP              | Yes                      |
| TRMT1L      | 81627   | TRMT1-like protein isoform 1                                                | NP_112196.3       | 2          | 5                 | 5          | 10     | 1                                                        | 0.72                                                     | 10.96                                                                                  | 4.88                                                                                   | 24.9                                                                                          | 7.9                                                                                           | 5                                                                              | 5                                                                              |         |                |                                                                                |                                          |                                   |                                 |                                                                              |                    |                          |
| PP1L1       | 51645   | peptidyl-prolyl cis-trans isomerase-like 1                                  | NP_057143.1       | 1          | 4                 | 4          | 7      | 1                                                        | 0.67                                                     | 9.4                                                                                    | 27.18                                                                                  | 23.3                                                                                          | 46.7                                                                                          | 6                                                                              | 6                                                                              | 3194    | 51645          | peptidylprolyl isomerase (cyclophilin)-like 1                                  | Isomerase activity                       | Cytoplasm                         | Enzyme: Isomerase               | Metabolism;Energy pathways                                                   | -                  | Yes                      |
| ERC2        | 26059   | ERC protein 2                                                               | NP_056391.1       | 1          | 1                 | 2          | 3      | 1                                                        | 0.65                                                     |                                                                                        |                                                                                        |                                                                                               |                                                                                               | 1                                                                              | 1                                                                              | 10810   | 26059          | None                                                                           | Cytoskeletal associated protein binding  | Cytoplasm                         | Cytoskeletal associated protein | Cell growth and/or maintenance                                               | CC                 | Yes                      |
| ACTN3       | 89      | alpha-actinin-3 isoform 1                                                   | NP_001095.2       | 2          | 2                 | 12         | 65     | 1                                                        | 0.62                                                     |                                                                                        |                                                                                        |                                                                                               |                                                                                               | 1                                                                              | 1                                                                              | 2148    | 89             | actinin, alpha 3                                                               | Cytoskeletal protein binding             | Cytoplasm                         | Cytoskeletal associated protein | Cell growth and/or maintenance                                               | CH,SPECTRIN,EFCC   | Yes                      |
| CERS6       | 255782  | ceramide synthase 6 isoform 1                                               | NP_001243055.1    | 2          | 1                 | 1          | 1      | 1                                                        | 0.55                                                     |                                                                                        |                                                                                        |                                                                                               |                                                                                               | 1                                                                              | 1                                                                              |         |                |                                                                                |                                          |                                   |                                 |                                                                              |                    |                          |
| ERCC6L      | 54821   | DNA excision repair protein ERCC-6-like                                     | NP_060139.2       | 1          | 3                 | 3          | 3      | 0.99                                                     | 1.9                                                      |                                                                                        |                                                                                        |                                                                                               |                                                                                               | 1                                                                              | 1                                                                              | 10974   | 54821          | None                                                                           | Molecular function unknown               | -                                 | Unclassified                    | Biological process unknown                                                   | DEXDc,HELIC        | No                       |
| TSNAX       | 7257    | translin-associated protein X                                               | NP_005990.1       | 1          | 4                 | 4          | 7      | 0.99                                                     | 1.72                                                     | 3.62                                                                                   | 2.34                                                                                   | 6.2                                                                                           | 7                                                                                             | 3                                                                              | 3                                                                              | 4270    | 7257           | translin-associated factor X                                                   | Transporter activity                     | Cytoplasm                         | Transport/cargo protein         | Regulation of nucleobase, nucleoside, nucleotide and nucleic acid metabolism | -                  | No                       |
| NUDT9       | 53343   | ADP-ribose pyrophosphatase, mitochondrial isoform a precursor               | NP_076952.1       | 3          | 1                 | 1          | 1      | 0.99                                                     | 1.68                                                     |                                                                                        |                                                                                        |                                                                                               |                                                                                               | 1                                                                              | 1                                                                              | 9353    | 53343          | nudix (nucleoside diphosphate linked moiety X)-type motif 9                    | Catalytic activity                       | Mitochondrion;Cytoplasm           | Enzyme: Phosphatase             | Ion transport                                                                | SP                 | Yes                      |
| LRPAP1      | 4043    | alpha-2-macroglobulin receptor-associated protein precursor                 | NP_002328.1       | 1          | 5                 | 5          | 9      | 0.99                                                     | 1.56                                                     | 7.7                                                                                    | 4.43                                                                                   | 17.1                                                                                          | 15.5                                                                                          | 5                                                                              | 5                                                                              | 82      | 4043           | low density lipoprotein receptor-related protein associated protein 1          | Chaperone activity                       | Endoplasmic reticulum             | Chaperone                       | Protein metabolism                                                           | CC,SP              | Yes                      |
| CDKAL1      | 54901   | threonylcarbamoyladenosine tRNA methyltransferase                           | NP_060244.2       | 1          | 2                 | 2          | 2      | 0.99                                                     | 1.54                                                     | 27                                                                                     | 4.71                                                                                   | 39.3                                                                                          | 10.3                                                                                          | 2                                                                              | 2                                                                              | 13022   | 54901          | CDK5 regulatory subunit associated protein-like 1                              | Molecular function unknown               | Integral to membrane              | Unclassified                    | Biological process unknown                                                   | TM                 | Yes                      |
| SSB         | 6741    | lupus La protein                                                            | NP_003133.1       | 1          | 21                | 21         | 66     | 0.99                                                     | 1.51                                                     | 5.32                                                                                   | 4.3                                                                                    | 30                                                                                            | 37.5                                                                                          | 31                                                                             | 31                                                                             | 168     | 6741           | Sjogren syndrome antigen B (autoantigen La)                                    | RNA binding                              | Nucleus                           | RNA binding protein             | Regulation of nucleobase, nucleoside, nucleotide and nucleic acid metabolism | CC,RRM             | No                       |
| PLAU        | 5328    | urokinase-type plasminogen activator isoform 1 prepropeptide                | NP_002649.1       | 2          | 3                 | 3          | 8      | 0.99                                                     | 1.49                                                     | 2.24                                                                                   | 4.31                                                                                   | 4.4                                                                                           | 12.9                                                                                          | 4                                                                              | 4                                                                              | 1883    | 5328           | plasminogen activator, urokinase                                               | Serine-type peptidase activity           | Plasma membrane                   | Serine protease                 | Protein metabolism                                                           | KRINGLE,TRYP,SN,SP | Yes                      |
| SFSWAP      | 6433    | splicing factor, suppressor of white-aggrecin homolog isoform 1             | NP_001248340.1    | 2          | 2                 | 2          | 4      | 0.99                                                     | 1.46                                                     | 0.64                                                                                   | 22.28                                                                                  | 0.9                                                                                           | 48.7                                                                                          | 2                                                                              | 2                                                                              |         |                |                                                                                |                                          |                                   |                                 |                                                                              |                    |                          |
| HSPAS       | 3312    | heat shock cognate 71 kDa protein isoform 1                                 | NP_006588.1       | 2          | 24                | 36         | 442    | 0.99                                                     | 1.43                                                     | 4.13                                                                                   | 5.31                                                                                   | 56.6                                                                                          | 125.1                                                                                         | 167                                                                            | 164                                                                            | 7205    | 3312           | heat shock 70kDa protein 8                                                     | Heat shock protein activity              | Nucleolus;Cytoplasm               | Heat shock protein              | Protein metabolism                                                           | CC,NLS,NES         | Yes                      |

Supplementary Table S1. List of quantified proteins in OKF6/TERT1-Smoke cells  
 Rajagopal *et al.*, 2017. Role of protein kinase N2 (PKN2) in cigarette smoke-mediated oncogenic transformation of oral cells

| Gene Symbol | Gene ID   | Protein Description                                                     | Protein Accession | # Proteins | # Unique Peptides | # Peptides | # PSMs | OKF6/TERT1-Smoke/<br>OKF6/TERT1-Parental<br>(130/126) R1 | OKF6/TERT1-Smoke/<br>OKF6/TERT1-Parental<br>(128/127) R2 | Ratio Standard Errors [%]:<br>OKF6/TERT1-Smoke/<br>OKF6/TERT1-Parental<br>(130/126) R1 | Ratio Standard Errors [%]:<br>OKF6/TERT1-Smoke/<br>OKF6/TERT1-Parental<br>(128/127) R2 | Ratio Variabilities [%]:<br>F13: OKF6/TERT1-<br>Smoke/<br>OKF6/TERT1-Parental<br>(130/126) R1 | Ratio Variabilities [%]:<br>F13: OKF6/TERT1-<br>Smoke/<br>OKF6/TERT1-Parental<br>(128/127) R2 | Ratio Counts: F13:<br>OKF6/TERT1-Smoke/<br>OKF6/TERT1-Parental<br>(130/126) R1 | Ratio Counts: F13:<br>OKF6/TERT1-Smoke/<br>OKF6/TERT1-Parental<br>(128/127) R2 | HPRD ID | Entrez Gene ID | Gene Name                                                                                                        | Molecular Function                             | Primary Localization  | Molecular Class                     | Biological Process                                                           | Domains                | Plasma Proteome Database |  |
|-------------|-----------|-------------------------------------------------------------------------|-------------------|------------|-------------------|------------|--------|----------------------------------------------------------|----------------------------------------------------------|----------------------------------------------------------------------------------------|----------------------------------------------------------------------------------------|-----------------------------------------------------------------------------------------------|-----------------------------------------------------------------------------------------------|--------------------------------------------------------------------------------|--------------------------------------------------------------------------------|---------|----------------|------------------------------------------------------------------------------------------------------------------|------------------------------------------------|-----------------------|-------------------------------------|------------------------------------------------------------------------------|------------------------|--------------------------|--|
| HIF0        | 3005      | histone H1.0                                                            | NP_005309.1       | 1          | 9                 | 9          | 41     | 0.99                                                     | 1.4                                                      | 10.24                                                                                  | 13.15                                                                                  | 49.4                                                                                          | 102.3                                                                                         | 21                                                                             | 21                                                                             | 819     | 3005           | H1 histone family member 0                                                                                       | DNA binding                                    | Nucleus               | DNA binding protein                 | Regulation of nucleobase, nucleoside, nucleotide and nucleic acid metabolism | H15;NLS                | Yes                      |  |
| SEMA4B      | 10509     | semaphorin-4B precursor                                                 | NP_064595.2       | 1          | 1                 | 1          | 1      | 0.99                                                     | 1.38                                                     |                                                                                        |                                                                                        |                                                                                               |                                                                                               | 1                                                                              | 1                                                                              | 10217   | 10509          | sema domain, immunoglobulin domain (Ig), transmembrane domain (TM) and short cytoplasmic domain, (semaphorin) 4B | Molecular function unknown                     | Plasma membrane       | Integral membrane protein           | Biological process unknown                                                   | SP;SEMA;PSITM          | Yes                      |  |
| EIF4A1      | 1973      | eukaryotic initiation factor 4A-1 isoform 1                             | NP_001407.1       | 2          | 11                | 23         | 203    | 0.99                                                     | 1.36                                                     | 6.3                                                                                    | 8.23                                                                                   | 53.9                                                                                          | 111.1                                                                                         | 65                                                                             | 64                                                                             | 4030    | 1973           | eukaryotic translation initiation factor 4A, isoform 1                                                           | Translation regulator activity                 | Cytoplasm             | Translation regulatory protein      | Protein metabolism                                                           | HELIC;DEXDc            | Yes                      |  |
| XPOT        | 11260     | exportin-T                                                              | NP_009166.2       | 1          | 8                 | 8          | 15     | 0.99                                                     | 1.35                                                     | 9.49                                                                                   | 7.59                                                                                   | 28.8                                                                                          | 31.5                                                                                          | 9                                                                              | 9                                                                              | 4418    | 11260          | exportin, tRNA (nuclear export receptor for RNAs)                                                                | Transporter activity                           | Nucleus               | Transport/cargo protein             | Transport                                                                    | IBN_NT                 | Yes                      |  |
| NAA10       | 8260      | N-alpha-acetyltransferase 10 isoform 1                                  | NP_003482.1       | 4          | 13                | 13         | 19     | 0.99                                                     | 1.31                                                     | 8.41                                                                                   | 7.46                                                                                   | 29.5                                                                                          | 34.9                                                                                          | 12                                                                             | 12                                                                             | 2056    | 8260           | ARD1 homolog A, N-acetyltransferase (Scerevisiae)                                                                | Acyltransferase activity                       | Cytoplasm             | Enzyme: Acyltransferase             | Metabolism;Energy pathways                                                   |                        | Yes                      |  |
| WDR37       | 22884     | WD repeat-containing protein 37                                         | NP_054742.2       | 1          | 2                 | 2          | 4      | 0.99                                                     | 1.28                                                     | 31.04                                                                                  | 55.11                                                                                  | 45.7                                                                                          | 130                                                                                           | 2                                                                              | 2                                                                              | 15668   | 22884          | WD repeat domain 37                                                                                              | Molecular function unknown                     | -                     | Unclassified                        | Biological process unknown                                                   | CC;WD40                | Yes                      |  |
| SNRPB       | 6628      | small nuclear ribonucleoprotein-associated proteins B and B' isoform B' | NP_937859.1       | 3          | 6                 | 6          | 20     | 0.99                                                     | 1.27                                                     | 7.42                                                                                   | 16.5                                                                                   | 23.5                                                                                          | 74.2                                                                                          | 10                                                                             | 10                                                                             | 1655    | 6628           | small nuclear ribonucleoprotein polypeptides Band B1                                                             | RNA binding                                    | Nucleus               | RNA binding protein                 | Regulation of nucleobase, nucleoside, nucleotide and nucleic acid metabolism | SM                     | Yes                      |  |
| LRSAM1      | 90678     | E3 ubiquitin-protein ligase LRSAM1 isoform 1                            | NP_001005373.1    | 2          | 7                 | 7          | 13     | 0.99                                                     | 1.27                                                     | 14.76                                                                                  | 10.91                                                                                  | 37                                                                                            | 34.9                                                                                          | 6                                                                              | 6                                                                              | 14325   | 90678          | leucine rich repeat and sterile alpha motif-containing 1                                                         | Ubiquitin-specific protease activity           | Cytoplasm             | Ubiquitin proteasome system protein | Cell communication;Signal transduction                                       | LRR;CC;SAM;RING;NLS;LZ | Yes                      |  |
| PUS1        | 80324     | tRNA pseudouridine synthase A, mitochondrial isoform 1                  | NP_079491.2       | 2          | 4                 | 4          | 8      | 0.99                                                     | 1.26                                                     | 1.53                                                                                   | 6.51                                                                                   | 3                                                                                             | 16.5                                                                                          | 4                                                                              | 4                                                                              | 10481   | 80324          | pseudouridylylate synthase 1                                                                                     | Catalytic activity                             | Nucleus               | Enzyme: Synthase                    | Regulation of nucleobase, nucleoside, nucleotide and nucleic acid metabolism |                        | Yes                      |  |
| CHCHD3      | 54927     | MICOS complex subunit MIC19                                             | NP_060282.1       | 1          | 11                | 11         | 21     | 0.99                                                     | 1.25                                                     | 4.97                                                                                   | 4.1                                                                                    | 18                                                                                            | 18.6                                                                                          | 13                                                                             | 13                                                                             | 13044   | 54927          | coiled-coil-helix-coiled-coil-helix domain-containing 3                                                          | Molecular function unknown                     | -                     | Unclassified                        | Biological process unknown                                                   | CC;CHCH                | Yes                      |  |
| PLEC        | 5339      | plectin isoform 1                                                       | NP_958782.1       | 16         | 4                 | 348        | 1371   | 0.99                                                     | 1.24                                                     | 1.16                                                                                   | 13.18                                                                                  | 2.3                                                                                           | 33.5                                                                                          | 4                                                                              | 4                                                                              |         |                |                                                                                                                  |                                                |                       |                                     |                                                                              |                        |                          |  |
| GSTP1       | 2950      | glutathione S-transferase P                                             | NP_000843.1       | 1          | 11                | 11         | 300    | 0.99                                                     | 1.23                                                     | 2.33                                                                                   | 4.03                                                                                   | 22.8                                                                                          | 51.2                                                                                          | 95                                                                             | 95                                                                             | 614     | 2950           | glutathione S-transferase pi                                                                                     | Glutathione transferase activity               | Cytoplasm             | Enzyme: Glutathione transferase     | Metabolism;Energy pathways                                                   |                        | Yes                      |  |
| EDEM3       | 80267     | ER degradation-enhancing alpha-mannosidase-like protein 3 precursor     | NP_079467.3       | 1          | 1                 | 1          | 2      | 0.99                                                     | 1.22                                                     | 1.22                                                                                   | 1.22                                                                                   | 0.99                                                                                          | 1.22                                                                                          | 1                                                                              | 1                                                                              | 10724   | 80267          | chromosome 1 open reading frame 22                                                                               | Hydrolase activity                             | Endoplasmic reticulum | Enzyme: Hydrolase                   | Metabolism;Energy pathways                                                   |                        | Yes                      |  |
| HSPH1       | 10808     | heat shock protein 105 kDa isoform 1                                    | NP_006635.2       | 4          | 37                | 42         | 143    | 0.99                                                     | 1.22                                                     | 3.47                                                                                   | 3.15                                                                                   | 28.8                                                                                          | 32.2                                                                                          | 67                                                                             | 67                                                                             | 9990    | 10808          | heat shock 105kDa/110kDa protein 1                                                                               | Heat shock protein activity;Chaperone activity | Cytoplasm             | Heat shock protein;Chaperone        | Protein metabolism                                                           |                        | Yes                      |  |
| IMPDH2      | 3615      | inosine 5'-monophosphate dehydrogenase 2                                | NP_000875.2       | 1          | 16                | 17         | 46     | 0.99                                                     | 1.22                                                     | 4.61                                                                                   | 4.39                                                                                   | 22.1                                                                                          | 26.1                                                                                          | 23                                                                             | 23                                                                             | 895     | 3615           | IMP (inosine monophosphate) dehydrogenase 2                                                                      | Catalytic activity                             | Cytosol;Cytoplasm     | Enzyme: Dehydrogenase               | Metabolism;Energy pathways                                                   | CBS                    | Yes                      |  |
| TRNT1       | 51095     | CCA-tRNA nucleotidyltransferase 1, mitochondrial isoform 1              | NP_886552.2       | 2          | 8                 | 8          | 17     | 0.99                                                     | 1.21                                                     | 6.56                                                                                   | 5.6                                                                                    | 20.9                                                                                          | 21.8                                                                                          | 10                                                                             | 10                                                                             | 18227   | 51095          | tRNA nucleotidyltransferase, CCA-adding, 1                                                                       | Nucleotidyltransferase activity                | Mitochondrion         | Enzyme: Nucleotidyltransferase      | Metabolism                                                                   | SP                     | Yes                      |  |
| RANGAP1     | 5905      | ran GTPase-activating protein 1                                         | NP_002874.1       | 1          | 22                | 22         | 64     | 0.99                                                     | 1.21                                                     | 3.84                                                                                   | 5.08                                                                                   | 23.1                                                                                          | 38.3                                                                                          | 36                                                                             | 36                                                                             | 3839    | 5905           | Ran GTPase activating protein 1                                                                                  | GTPase activator activity                      | Cytoplasm             | GTPase activating protein           | Cell communication;Signal transduction                                       | LRR;CC                 | Yes                      |  |
| NDUFA2      | 91942     | mimitin, mitochondrial                                                  | NP_777549.1       | 1          | 5                 | 5          | 15     | 0.99                                                     | 1.21                                                     | 14.71                                                                                  | 5.44                                                                                   | 40.1                                                                                          | 17.6                                                                                          | 7                                                                              | 7                                                                              | 14288   | 91942          | None                                                                                                             | Molecular function unknown                     | Mitochondrion         | Unclassified                        | Cell proliferation                                                           |                        | No                       |  |
| EXOSC7      | 23016     | exosome complex component RRP42                                         | NP_055819.2       | 1          | 5                 | 5          | 12     | 0.99                                                     | 1.2                                                      | 5.24                                                                                   | 2.12                                                                                   | 12.8                                                                                          | 6.2                                                                                           | 6                                                                              | 6                                                                              | 9401    | 23016          | exosome component 7                                                                                              | Ribonuclease activity                          | Nucleolus             | Ribonuclease                        | Regulation of nucleobase, nucleoside, nucleotide and nucleic acid metabolism |                        | Yes                      |  |
| CTSA        | 5476      | lysosomal protective protein isoform a precursor                        | NP_000299.2       | 3          | 2                 | 2          | 6      | 0.99                                                     | 1.19                                                     | 10.23                                                                                  | 8.74                                                                                   | 17.7                                                                                          | 18.1                                                                                          | 3                                                                              | 3                                                                              | 2020    | 5476           | protective protein for beta-galactosidase (galactosialidosis)                                                    | Serine-type peptidase activity                 | Lysosome              | Serine protease                     | Protein metabolism                                                           | SP                     | Yes                      |  |
| CORO7-PAM16 | 100529144 | CORO7-PAM16 protein                                                     | NP_001188408.1    | 5          | 9                 | 9          | 33     | 0.99                                                     | 1.19                                                     | 4.48                                                                                   | 2.87                                                                                   | 13.4                                                                                          | 10.8                                                                                          | 9                                                                              | 10                                                                             |         |                |                                                                                                                  |                                                |                       |                                     |                                                                              |                        |                          |  |
| C9orf114    | 51490     | putative methyltransferase C9orf114                                     | NP_057474.2       | 1          | 1                 | 1          | 3      | 0.99                                                     | 1.15                                                     | 1.88                                                                                   | 9.18                                                                                   | 2.6                                                                                           | 15                                                                                            | 2                                                                              | 2                                                                              | 12935   | 51490          | chromosome 9 open reading frame 114                                                                              | Molecular function unknown                     | Nucleolus             | Unclassified                        | Biological process unknown                                                   | CC                     | No                       |  |
| EDF1        | 8721      | endothelial differentiation-related factor 1 isoform alpha              | NP_003783.1       | 5          | 2                 | 2          | 4      | 0.99                                                     | 1.13                                                     | 2.52                                                                                   | 13.1                                                                                   | 4.3                                                                                           | 26.1                                                                                          | 3                                                                              | 3                                                                              | 9235    | 8721           | endothelial differentiation-related factor 1                                                                     | Transcription regulator activity               | Nucleus;Cytoplasm     | Transcription regulatory protein    | Regulation of nucleobase, nucleoside, nucleotide and nucleic acid metabolism |                        | Yes                      |  |
| FASTKD5     | 60493     | FAST kinase domain-containing protein 5                                 | NP_068598.1       | 1          | 5                 | 5          | 8      | 0.99                                                     | 1.12                                                     | 8.14                                                                                   | 11.2                                                                                   | 16.3                                                                                          | 25.6                                                                                          | 4                                                                              | 4                                                                              | 7813    | 60493          | None                                                                                                             | Molecular function unknown                     | -                     | Unclassified                        | Biological process unknown                                                   |                        | Yes                      |  |
| DAP3        | 7818      | 28S ribosomal protein S29, mitochondrial isoform 1                      | NP_387506.1       | 3          | 11                | 11         | 36     | 0.99                                                     | 1.12                                                     | 6.95                                                                                   | 11.68                                                                                  | 30.6                                                                                          | 61.9                                                                                          | 19                                                                             | 19                                                                             | 3646    | 7818           | death associated protein 3                                                                                       | Ribonucleoprotein                              | Mitochondrion         | Ribosomal subunit                   | Apoptosis                                                                    |                        | Yes                      |  |
| TGM2        | 7052      | protein-glutamine gamma-glutamyltransferase 2 isoform a                 | NP_004604.2       | 2          | 23                | 23         | 110    | 0.99                                                     | 1.12                                                     | 3.01                                                                                   | 2.12                                                                                   | 22.2                                                                                          | 17.5                                                                                          | 54                                                                             | 54                                                                             | 1825    | 7052           | transglutaminase 2 (C polypeptide, protein-glutamine-gamma-glutamyltransferase)                                  | Transaminase activity                          | Cytoplasm             | Enzyme: Aminotransferase            | Metabolism;Energy pathways                                                   | TGC;TRANSGLUT          | Yes                      |  |

Supplementary Table S1. List of quantified proteins in OKF6/TERT1-Smoke cells  
 Raingopaln *et al.*, 2017. Role of protein kinase N2 (PKN2) in cigarette smoke-mediated oncogenic transformation of oral cells

| Gene Symbol | Gene ID | Protein Description                                                         | Protein Accession | # Proteins | # Unique Peptides | # Peptides | # PSMs | OKF6/TERT1-Smoke/<br>OKF6/TERT1-Parental<br>(130/126) R1 | OKF6/TERT1-Smoke/<br>OKF6/TERT1-Parental<br>(128/127) R2 | Ratio Standard Errors [%]:<br>OKF6/TERT1-Smoke/<br>OKF6/TERT1-Parental<br>(130/126) R1 | Ratio Standard Errors [%]:<br>OKF6/TERT1-Smoke/<br>OKF6/TERT1-Parental<br>(128/127) R2 | Ratio Variabilities [%]:<br>F13: OKF6/TERT1-<br>Smoke/<br>OKF6/TERT1-Parental<br>(130/126) R1 | Ratio Variabilities [%]:<br>F13: OKF6/TERT1-<br>Smoke/<br>OKF6/TERT1-Parental<br>(128/127) R2 | Ratio Counts: F13:<br>OKF6/TERT1-Smoke/<br>OKF6/TERT1-Parental<br>(130/126) R1 | Ratio Counts: F13:<br>OKF6/TERT1-Smoke/<br>OKF6/TERT1-Parental<br>(128/127) R2 | HPRD ID | Entrez Gene Id | Gene Name                                                                                     | Molecular Function                            | Primary Localization                                | Molecular Class                                   | Biological Process                                                           | Domains                 | Plasma Proteome Database |
|-------------|---------|-----------------------------------------------------------------------------|-------------------|------------|-------------------|------------|--------|----------------------------------------------------------|----------------------------------------------------------|----------------------------------------------------------------------------------------|----------------------------------------------------------------------------------------|-----------------------------------------------------------------------------------------------|-----------------------------------------------------------------------------------------------|--------------------------------------------------------------------------------|--------------------------------------------------------------------------------|---------|----------------|-----------------------------------------------------------------------------------------------|-----------------------------------------------|-----------------------------------------------------|---------------------------------------------------|------------------------------------------------------------------------------|-------------------------|--------------------------|
| ATP6V1E1    | 529     | V-type proton ATPase subunit E 1 isoform A                                  | NP_001687.1       | 7          | 7                 | 7          | 15     | 0.99                                                     | 1.11                                                     | 13.17                                                                                  | 15.48                                                                                  | 38.3                                                                                          | 51.4                                                                                          | 8                                                                              | 8                                                                              | 163     | 529            | ATPase, H <sup>+</sup> -transporting; lysosomal 31kDa; V1 subunit E isoform 1                 | ATPase activity                               | Lysosome                                            | ATPase                                            | Transport                                                                    | -                       | Yes                      |
| IGF2R       | 3482    | cation-independent mannose-6-phosphate receptor precursor                   | NP_000867.2       | 1          | 19                | 19         | 35     | 0.99                                                     | 1.11                                                     | 2.66                                                                                   | 4.4                                                                                    | 11.5                                                                                          | 21.5                                                                                          | 19                                                                             | 19                                                                             | 928     | 3482           | insulin-like growth factor 2 receptor                                                         | Receptor activity                             | Plasma membrane                                     | Cell surface receptor                             | Cell communication; Signal transduction                                      | TM,FN2,SP               | Yes                      |
| APRT        | 353     | adenine phosphoribosyltransferase isoform a                                 | NP_000476.1       | 2          | 7                 | 7          | 24     | 0.99                                                     | 1.1                                                      | 2.2                                                                                    | 3.87                                                                                   | 7.9                                                                                           | 15.5                                                                                          | 13                                                                             | 13                                                                             | 29      | 353            | adenine phosphoribosyltransferase                                                             | Transferase activity                          | -                                                   | Enzyme: Ribosyltransferase                        | Purine salvage                                                               | -                       | Yes                      |
| SDCBP       | 6386    | syntenin-1 isoform 1                                                        | NP_005616.2       | 3          | 4                 | 4          | 15     | 0.99                                                     | 1.08                                                     | 8.52                                                                                   | 11.34                                                                                  | 22.7                                                                                          | 33.4                                                                                          | 7                                                                              | 7                                                                              | 3741    | 6386           | syndecan binding protein (syntenin)                                                           | Receptor signaling complex scaffold activity  | Plasma membrane                                     | Adapter molecule                                  | Cell communication; Signal transduction                                      | PDZ                     | Yes                      |
| GNL3L       | 54552   | guanine nucleotide-binding protein-like 3-like protein                      | NP_061940.1       | 1          | 1                 | 1          | 4      | 0.99                                                     | 1.08                                                     | 14.34                                                                                  | 22.08                                                                                  | 20.2                                                                                          | 34.7                                                                                          | 2                                                                              | 2                                                                              | 6514    | 54552          | guanine nucleotide binding protein-like 3(nucleolar)-like                                     | Molecular function unknown                    | -                                                   | Unclassified                                      | Biological process unknown                                                   | CC                      | Yes                      |
| TMPO        | 7112    | thymopoietin isoform alpha                                                  | NP_003267.1       | 1          | 7                 | 14         | 38     | 0.99                                                     | 1.08                                                     | 8.48                                                                                   | 10.98                                                                                  | 25.5                                                                                          | 36.9                                                                                          | 9                                                                              | 9                                                                              | 1777    | 7112           | thymopoietin                                                                                  | Molecular function unknown                    | Nucleus; Nuclear membrane; Mitochondrion; Cytoplasm | Peptide hormone                                   | Nuclear organization and biogenesis; Regulation of cell cycle                | TM                      | Yes                      |
| SUGP2       | 10147   | SURP and G-patch domain-containing protein 2                                | NP_055699.2       | 1          | 3                 | 3          | 5      | 0.99                                                     | 1.07                                                     | 0.55                                                                                   | 21.68                                                                                  | 0.9                                                                                           | 41.8                                                                                          | 3                                                                              | 3                                                                              |         |                |                                                                                               |                                               |                                                     |                                                   |                                                                              |                         |                          |
| EIF3D       | 8664    | eukaryotic translation initiation factor 3 subunit D                        | NP_003744.1       | 1          | 19                | 19         | 78     | 0.99                                                     | 1.07                                                     | 5.86                                                                                   | 6.43                                                                                   | 38.4                                                                                          | 46.9                                                                                          | 41                                                                             | 42                                                                             | 4888    | 8664           | eukaryotic translation initiation factor 3, subunit 7 zeta, 66kDa                             | Translation regulator activity                | Cytoplasm                                           | Translation regulatory protein                    | Protein metabolism                                                           | -                       | Yes                      |
| XRCC6       | 2547    | X-ray repair cross-complementing protein 6 isoform 1                        | NP_001460.1       | 3          | 30                | 30         | 168    | 0.99                                                     | 1.06                                                     | 2.95                                                                                   | 3.48                                                                                   | 27.7                                                                                          | 35.4                                                                                          | 87                                                                             | 87                                                                             | 1071    | 2547           | X-ray repair complementing defective repair in Chinese hamster cells 6 (Ku autotarget, 70kDa) | DNA binding                                   | Nucleus                                             | DNA binding protein                               | Regulation of nucleobase, nucleoside, nucleotide and nucleic acid metabolism | Ku78,SAP,VWA            | Yes                      |
| PACSIN2     | 11252   | protein kinase C and casein kinase substrate in neurons protein 2 isoform A | NP_009160.2       | 2          | 13                | 13         | 22     | 0.99                                                     | 1.05                                                     | 2.4                                                                                    | 8.05                                                                                   | 8.2                                                                                           | 29.9                                                                                          | 12                                                                             | 12                                                                             | 5390    | 11252          | protein kinase C and casein kinase substrate in neurons 2                                     | Receptor signaling complex scaffold activity  | Cytoplasm                                           | Adapter molecule                                  | Cell communication; Signal transduction                                      | FCH,CC,SH3              | Yes                      |
| TIAL1       | 7073    | nucleolysin TIAR isoform 2                                                  | NP_001029097.1    | 4          | 3                 | 3          | 8      | 0.99                                                     | 1.05                                                     | 1.18                                                                                   | 9.04                                                                                   | 2.3                                                                                           | 19.2                                                                                          | 4                                                                              | 4                                                                              | 4563    | 7073           | TIAR1 cytotoxic granule-associated RNA binding protein-like 1                                 | RNA binding                                   | Nucleus                                             | RNA binding protein                               | Regulation of nucleobase, nucleoside, nucleotide and nucleic acid metabolism | RRM                     | Yes                      |
| SGTA        | 6449    | small glutamine-rich tetrapeptide repeat-containing protein alpha           | NP_003012.1       | 1          | 8                 | 8          | 18     | 0.99                                                     | 1.04                                                     | 8.44                                                                                   | 6.76                                                                                   | 26.9                                                                                          | 22.6                                                                                          | 10                                                                             | 10                                                                             | 4568    | 6449           | small glutamine-rich tetrapeptide repeat (TPR)-containing, alpha                              | Chaperone activity                            | Cytoplasm                                           | Chaperone                                         | Protein metabolism                                                           | TPR                     | Yes                      |
| TOP3B       | 8940    | DNA topoisomerase 3-beta-1                                                  | NP_001269041.1    | 1          | 1                 | 1          | 2      | 0.99                                                     | 1.04                                                     |                                                                                        |                                                                                        |                                                                                               |                                                                                               | 1                                                                              | 1                                                                              | 4662    | 8940           | topoisomerase (DNA) III beta                                                                  | DNA topoisomerase activity                    | Nucleus                                             | Enzyme: Topoisomerase                             | Regulation of nucleobase, nucleoside, nucleotide and nucleic acid metabolism | NLS                     | Yes                      |
| LETM1       | 3954    | LETM1 and EF-hand domain-containing protein 1, mitochondrial precursor      | NP_036450.1       | 1          | 16                | 16         | 64     | 0.99                                                     | 1.02                                                     | 7.04                                                                                   | 6.32                                                                                   | 41.7                                                                                          | 38.9                                                                                          | 33                                                                             | 34                                                                             | 5101    | 3954           | leucine zipper-EF-hand containing transmembrane protein 1                                     | Calcium ion binding                           | Plasma membrane                                     | Calcium binding protein                           | Cell communication; Signal transduction                                      | TM,CC                   | No                       |
| ABCC1       | 4363    | multidrug resistance-associated protein 1                                   | NP_004987.2       | 1          | 8                 | 8          | 22     | 0.99                                                     | 1.02                                                     | 12.61                                                                                  | 5.14                                                                                   | 41.1                                                                                          | 16.7                                                                                          | 10                                                                             | 10                                                                             | 1153    | 4363           | ATP-binding cassette, sub-family C (CFTR/MRP), member 1                                       | Transporter activity                          | Plasma membrane                                     | Transport/cargo protein                           | Transport                                                                    | TM,AAA                  | Yes                      |
| UBA1        | 7317    | ubiquitin-like modifier-activating enzyme 1                                 | NP_695012.1       | 1          | 42                | 42         | 231    | 0.99                                                     | 1.01                                                     | 2.25                                                                                   | 2.86                                                                                   | 23.9                                                                                          | 31.3                                                                                          | 113                                                                            | 112                                                                            | 2440    | 7317           | ubiquitin-activating enzyme E1 (A1S/T and B/T/temperature sensitivity complementing)          | Ubiquitin-specific protease activity          | Nucleus                                             | Ubiquitin proteasome system protein               | Proteolysis and peptidolysis                                                 | -                       | Yes                      |
| TJP2        | 9414    | tight junction protein ZO-2 isoform 3                                       | NP_001163887.1    | 6          | 24                | 24         | 43     | 0.99                                                     | 1.01                                                     | 3.75                                                                                   | 5.72                                                                                   | 19                                                                                            | 30.2                                                                                          | 26                                                                             | 26                                                                             | 6369    | 9414           | tight junction protein 2 (zona occludens 2)                                                   | Cell adhesion molecule activity               | Cytoplasm                                           | Cell junction protein                             | Cell communication; Signal transduction                                      | PDZ,SH3,GukKinase,CC,LZ | Yes                      |
| PDS5A       | 23244   | sister chromatid cohesion protein PDS5 homolog A isoform 1                  | NP_001093869.1    | 2          | 13                | 14         | 33     | 0.99                                                     | 1.01                                                     | 5.66                                                                                   | 4.46                                                                                   | 22.8                                                                                          | 18.1                                                                                          | 16                                                                             | 16                                                                             | 11537   | 23244          | None                                                                                          | Molecular function unknown                    | Nucleus                                             | Unclassified                                      | Apoptosis                                                                    | -                       | Yes                      |
| WIZ         | 58525   | protein Wiz                                                                 | NP_067064.2       | 1          | 3                 | 3          | 5      | 0.99                                                     | 1                                                        | 22.61                                                                                  | 2.18                                                                                   | 40.4                                                                                          | 3.8                                                                                           | 3                                                                              | 3                                                                              | 11686   | 58525          | None                                                                                          | Transcription regulator activity              | Nucleus                                             | Adapter molecule; Transcription regulator protein | Regulation of nucleobase, nucleoside, nucleotide and nucleic acid metabolism | ZNFC2                   | Yes                      |
| RPS3        | 6188    | 40S ribosomal protein S3 isoform 1                                          | NP_001243731.1    | 3          | 22                | 22         | 116    | 0.99                                                     | 1                                                        | 3.99                                                                                   | 3.88                                                                                   | 31.1                                                                                          | 30.4                                                                                          | 59                                                                             | 59                                                                             | 10941   | 6188           | ribosomal protein S3                                                                          | Structural constituent of ribosome            | Cytoplasm                                           | Ribosomal subunit                                 | Protein metabolism                                                           | NLS,KH                  | Yes                      |
| MRPS15      | 64960   | 28S ribosomal protein S15, mitochondrial                                    | NP_112570.2       | 1          | 6                 | 6          | 10     | 0.99                                                     | 0.99                                                     | 7.71                                                                                   | 19.55                                                                                  | 17.2                                                                                          | 45.5                                                                                          | 5                                                                              | 5                                                                              | 11372   | 64960          | mitochondrial ribosomal protein S15                                                           | Structural constituent of ribosome            | Mitochondrion                                       | Ribosomal subunit                                 | Protein metabolism                                                           | CC                      | Yes                      |
| HDAC2       | 3066    | histone deacetylase 2                                                       | NP_001518.3       | 1          | 5                 | 8          | 19     | 0.99                                                     | 0.99                                                     | 3.44                                                                                   | 26.34                                                                                  | 8.3                                                                                           | 71.3                                                                                          | 6                                                                              | 6                                                                              | 5521    | 3066           | histone deacetylase 2                                                                         | Transcription regulator activity; DNA binding | Nucleus                                             | Transcription regulatory protein                  | Regulation of nucleobase, nucleoside, nucleotide and nucleic acid metabolism | CC,SP                   | Yes                      |



Supplementary Table S1. List of quantified proteins in OKF6/TERT1-Smoke cells

Raignanalan *et al.*, 2017. Role of protein kinase N2 (PKN2) in cigarette smoke-mediated oncogenic transformation of oral cells

| Gene Symbol | Gene ID | Protein Description                                              | Protein Accession | # Proteins | # Unique Peptides | # Peptides | # PSMs | OKF6/TERT1-Smoke/<br>OKF6/TERT1-Parental<br>(130/126) R1 | OKF6/TERT1-Smoke/<br>OKF6/TERT1-Parental<br>(128/127) R2 | Ratio Standard Errors [%]:<br>OKF6/TERT1-Smoke/<br>OKF6/TERT1-Parental<br>(130/126) R1 | Ratio Standard Errors [%]:<br>OKF6/TERT1-Smoke/<br>OKF6/TERT1-Parental<br>(128/127) R2 | Ratio Variabilities [%]:<br>F13: OKF6/TERT1-<br>Smoke/<br>OKF6/TERT1-Parental<br>(130/126) R1 | Ratio Variabilities [%]:<br>F13: OKF6/TERT1-<br>Smoke/<br>OKF6/TERT1-Parental<br>(128/127) R2 | Ratio Counts: F13:<br>OKF6/TERT1-Smoke/<br>OKF6/TERT1-Parental<br>(130/126) R1 | Ratio Counts: F13:<br>OKF6/TERT1-Smoke/<br>OKF6/TERT1-Parental<br>(128/127) R2 | HPRD ID | Entrez Gene ID | Gene Name                                                                               | Molecular Function                           | Primary Localization | Molecular Class                    | Biological Process                                                           | Domains              | Plasma Proteome Database |
|-------------|---------|------------------------------------------------------------------|-------------------|------------|-------------------|------------|--------|----------------------------------------------------------|----------------------------------------------------------|----------------------------------------------------------------------------------------|----------------------------------------------------------------------------------------|-----------------------------------------------------------------------------------------------|-----------------------------------------------------------------------------------------------|--------------------------------------------------------------------------------|--------------------------------------------------------------------------------|---------|----------------|-----------------------------------------------------------------------------------------|----------------------------------------------|----------------------|------------------------------------|------------------------------------------------------------------------------|----------------------|--------------------------|
| APLP2       | 334     | amyloid-like protein 2 isoform 1 precursor                       | NP_001633.1       | 5          | 4                 | 4          | 6      | 0.99                                                     | 0.84                                                     | 19.9                                                                                   | 12.56                                                                                  | 40.8                                                                                          | 21.4                                                                                          | 4                                                                              | 4                                                                              | 103     | 334            | amyloid beta (A $\beta$ ) precursor-like protein 2                                      | Protein binding                              | Plasma membrane      | Integral membrane protein          | Cell communication;Signal transduction                                       | KUNITZ;TM;CC;NPXY;SP | Yes                      |
| SDR39U1     | 56948   | epimerase family protein SDR39U1 isoform 1                       | NP_064580.2       | 1          | 1                 | 1          | 2      | 0.99                                                     | 0.84                                                     |                                                                                        |                                                                                        |                                                                                               |                                                                                               | 1                                                                              | 1                                                                              | 16598   | 56948          | chromosome 14 open reading frame 124                                                    | Molecular function unknown                   | -                    | Unclassified                       | Biological process                                                           | -                    | No                       |
| PDSS2       | 57107   | decapryl- <i>l</i> -phosphate synthase subunit 2                 | NP_065114.3       | 1          | 1                 | 1          | 1      | 0.99                                                     | 0.83                                                     |                                                                                        |                                                                                        |                                                                                               |                                                                                               | 1                                                                              | 1                                                                              | 12879   | 57107          | chromosome 6 open reading frame 210                                                     | Molecular function unknown                   | Mitochondrion        | Unclassified                       | Biological process                                                           | SP                   | No                       |
| YWHAG       | 7532    | 14-3-3 protein gamma                                             | NP_036611.2       | 1          | 10                | 15         | 120    | 0.99                                                     | 0.82                                                     | 2.65                                                                                   | 9.3                                                                                    | 12.4                                                                                          | 37.1                                                                                          | 22                                                                             | 22                                                                             | 5639    | 7532           | tyrosine 3-monooxygenase/typtophan5-monooxygenase activation protein, gamma polypeptide | Receptor signaling complex scaffold activity | Cytoplasm            | Adapter molecule                   | Cell communication;Signal transduction                                       | -                    | Yes                      |
| SMAPI1      | 60682   | stromal membrane-associated protein 1 isoform A                  | NP_001037770.1    | 3          | 1                 | 1          | 2      | 0.99                                                     | 0.82                                                     |                                                                                        |                                                                                        |                                                                                               |                                                                                               | 1                                                                              | 1                                                                              | 18072   | 60682          | stromal membrane-associated protein 1                                                   | Binding                                      | Integral to membrane | Integral membrane protein          | Cell growth and/or maintenance                                               | TM;CXXC              | No                       |
| DOCK9       | 23348   | dedicator of cytokinesis protein 9 isoform A                     | NP_056111.1       | 4          | 3                 | 3          | 4      | 0.99                                                     | 0.81                                                     | 7.76                                                                                   | 26.62                                                                                  | 13.3                                                                                          | 38.8                                                                                          | 3                                                                              | 3                                                                              | 9542    | 23348          | dedicator of cytokinesis 9                                                              | Guanyl-nucleotide exchange factor activity   | Plasma membrane      | Guanine nucleotide exchange factor | Cell communication;Signal transduction                                       | PH;CC                | Yes                      |
| VPS11       | 55823   | vacuolar protein sorting-associated protein 11 homolog isoform 1 | NP_068375.3       | 2          | 2                 | 2          | 2      | 0.99                                                     | 0.81                                                     | 2.56                                                                                   | 38.93                                                                                  | 3.6                                                                                           | 47                                                                                            | 2                                                                              | 2                                                                              | 12258   | 55823          | vacuolar protein sorting 11 (yeast)                                                     | Transporter activity                         | Endosome             | Transport/cargo protein            | Transport                                                                    | CC;RING              | Yes                      |
| MICAL3      | 57553   | protein-methionine sulfoxide oxidase MICAL3 isoform 1            | NP_056056.2       | 3          | 3                 | 4          | 9      | 0.99                                                     | 0.78                                                     | 9.42                                                                                   | 9.6                                                                                    | 16.2                                                                                          | 13                                                                                            | 3                                                                              | 3                                                                              | 19352   | 57553          | microtubule associated monooxygenase, calponin and LIM domain containing 3              | Cytoskeletal protein binding                 | Cytoplasm            | Cytoskeletal associated protein    | Cell motility;Transport                                                      | CC                   | Yes                      |
| EPHX2       | 2053    | bifunctional epoxide hydrolase 2 isoform a                       | NP_001970.2       | 3          | 1                 | 1          | 2      | 0.99                                                     | 0.74                                                     |                                                                                        |                                                                                        |                                                                                               |                                                                                               | 1                                                                              | 1                                                                              | 582     | 2053           | epoxide hydrolase 2, cytoplasmic                                                        | Hydrolase activity                           | Cytoplasm            | Enzyme: Hydrolase                  | Metabolism;Energy pathways                                                   | ABH                  | Yes                      |
| POGZ        | 23126   | pogo transposable element with ZNF domain isoform 1              | NP_055915.2       | 5          | 5                 | 5          | 8      | 0.99                                                     | 0.72                                                     | 30.17                                                                                  | 2.18                                                                                   | 55.4                                                                                          | 2.7                                                                                           | 3                                                                              | 3                                                                              | 11445   | 23126          | pogo transposable element with ZNF domain                                               | Transcription regulator activity             | Nucleus              | Transcription regulatory protein   | Regulation of nucleobase, nucleoside, nucleotide and nucleic acid metabolism | ZNFC2                | Yes                      |
| SH3PX2A     | 9644    | SH3 and PX domain-containing protein 2A                          | NP_055446.2       | 3          | 2                 | 2          | 2      | 0.99                                                     | 0.69                                                     |                                                                                        |                                                                                        |                                                                                               |                                                                                               | 1                                                                              | 1                                                                              | 10228   | 9644           | SH3 multiple domains 1                                                                  | Receptor signaling complex scaffold activity | Nucleus              | Adapter molecule                   | Cell communication;Signal transduction                                       | PX;SH3;CC            | No                       |
| INTS4       | 92105   | integrator complex subunit 4                                     | NP_291025.3       | 1          | 4                 | 4          | 11     | 0.99                                                     | 0.69                                                     | 13.11                                                                                  | 28.68                                                                                  | 32.6                                                                                          | 51.2                                                                                          | 6                                                                              | 6                                                                              | 12386   | 92105          | None                                                                                    | Transcription regulator activity             | -                    | Transcription regulatory protein   | Regulation of nucleobase, nucleoside, nucleotide and nucleic acid metabolism | ADAP                 | Yes                      |
| CBX1        | 10951   | chromobox protein homolog 1                                      | NP_001120700.1    | 1          | 3                 | 4          | 18     | 0.99                                                     | 0.68                                                     | 7.85                                                                                   | 29.47                                                                                  | 15.7                                                                                          | 41.7                                                                                          | 4                                                                              | 4                                                                              | 5149    | 10951          | chromobox homolog 1 (HP1 beta homolog Drosophila)                                       | DNA binding                                  | Nucleus              | DNA binding protein                | Regulation of nucleobase, nucleoside, nucleotide and nucleic acid metabolism | CHROMO               | No                       |
| ABHD12      | 26090   | monoacylglycerol lipase ABHD12 isoform b                         | NP_056415.1       | 2          | 3                 | 3          | 6      | 0.99                                                     | 0.6                                                      | 10.43                                                                                  | 8.04                                                                                   | 18                                                                                            | 8.4                                                                                           | 3                                                                              | 3                                                                              | 7094    | 26090          | chromosome 20 open reading frame 22                                                     | Molecular function unknown                   | -                    | Integral membrane protein          | Biological process                                                           | TM;ABH               | Yes                      |
| HSBP1       | 3281    | heat shock factor-binding protein 1                              | NP_001528.1       | 1          | 3                 | 3          | 5      | 0.99                                                     | 0.57                                                     | 5.7                                                                                    | 31.97                                                                                  | 8                                                                                             | 26.2                                                                                          | 2                                                                              | 2                                                                              | 5185    | 3281           | heat shock factor binding protein 1                                                     | Transcription regulator activity             | Nucleus              | Transcription regulatory protein   | Regulation of nucleobase, nucleoside, nucleotide and nucleic acid metabolism | CC                   | Yes                      |
| TOMM22      | 56993   | mitochondrial import receptor subunit TOM22 homolog              | NP_064628.1       | 1          | 4                 | 4          | 38     | 0.98                                                     | 1.75                                                     | 13.02                                                                                  | 14.62                                                                                  | 56.4                                                                                          | 142.9                                                                                         | 17                                                                             | 17                                                                             | 6130    | 56993          | translocase of outer mitochondrial membrane 22homolog (yeast)                           | Auxiliary transport protein activity         | Mitochondrion        | Membrane transport protein         | Transport                                                                    | TM                   | Yes                      |
| MEI1        | 4201    | male-enhanced antigen 1                                          | NP_055438.1       | 1          | 1                 | 1          | 3      | 0.98                                                     | 1.74                                                     | 18.26                                                                                  | 6.27                                                                                   | 25.8                                                                                          | 15.6                                                                                          | 2                                                                              | 2                                                                              | 885     | 4201           | male-enhanced antigen 1                                                                 | Molecular function unknown                   | Cytoplasm            | Unclassified                       | Biological process                                                           | -                    | Yes                      |
| EXOSC5      | 56915   | exosome complex component RRP46                                  | NP_064543.3       | 1          | 2                 | 2          | 7      | 0.98                                                     | 1.61                                                     | 15.58                                                                                  | 1.37                                                                                   | 31.4                                                                                          | 4.4                                                                                           | 4                                                                              | 4                                                                              | 16222   | 56915          | exosome component 5                                                                     | Ribonuclease activity                        | Nucleolus            | Ribonuclease                       | Regulation of nucleobase, nucleoside, nucleotide and nucleic acid metabolism | -                    | Yes                      |
| AUP1        | 550     | ancient ubiquitinous protein 1                                   | NP_853553.1       | 1          | 3                 | 3          | 7      | 0.98                                                     | 1.56                                                     | 8.7                                                                                    | 13.06                                                                                  | 19.2                                                                                          | 47.9                                                                                          | 5                                                                              | 5                                                                              | 3892    | 550            | ancient ubiquitinous protein 1                                                          | Molecular function unknown                   | Cytoplasm            | Unclassified                       | Cell communication;Signal transduction                                       | PISC;CUE;SP          | Yes                      |
| SLC4A1AP    | 22950   | kanadapin                                                        | NP_060628.2       | 1          | 3                 | 3          | 5      | 0.98                                                     | 1.51                                                     | 18.4                                                                                   | 13.86                                                                                  | 25.9                                                                                          | 30.4                                                                                          | 2                                                                              | 2                                                                              | 4038    | 22950          | solute carrier family 4 (anion exchanger), member 1, adaptor protein                    | Receptor signaling complex scaffold activity | Nucleus              | Adapter molecule                   | Cell communication;Signal transduction                                       | FHA;DSRM;CC;NLS      | No                       |
| MAGO8B      | 55110   | protein mago nashi homolog 2 isoform 1                           | NP_060518.1       | 3          | 7                 | 7          | 13     | 0.98                                                     | 1.45                                                     | 7.47                                                                                   | 2.85                                                                                   | 23.6                                                                                          | 13.1                                                                                          | 10                                                                             | 10                                                                             | 8544    | 55110          | None                                                                                    | Molecular function unknown                   | Nucleus              | Unclassified                       | Biological process                                                           | -                    | No                       |
| AGFG1       | 3267    | arf-GAP domain and FG repeat-containing protein 1 isoform 1      | NP_001128659.1    | 4          | 3                 | 3          | 5      | 0.98                                                     | 1.37                                                     | 4.81                                                                                   | 4.38                                                                                   | 8.2                                                                                           | 10.4                                                                                          | 3                                                                              | 3                                                                              | 2918    | 3267           | HIV-1 Rev binding protein                                                               | RNA binding                                  | Nucleus              | RNA binding protein                | Regulation of nucleobase, nucleoside, nucleotide and nucleic acid metabolism | ARFGAP               | Yes                      |
| FUBP1       | 8880    | far upstream element-binding protein 1 isoform 2                 | NP_003893.2       | 2          | 15                | 17         | 31     | 0.98                                                     | 1.35                                                     | 6.18                                                                                   | 6.33                                                                                   | 24.6                                                                                          | 35.3                                                                                          | 16                                                                             | 16                                                                             | 10349   | 8880           | far upstream element (FUSE) binding protein 1                                           | Transcription regulator activity             | Nucleus              | Transcription regulatory protein   | Regulation of nucleobase, nucleoside, nucleotide and nucleic acid metabolism | KH;NLS               | Yes                      |

Supplementary Table S1. List of quantified proteins in OKF6/TERT1-Smoke cells  
 Raignanalan *et al.*, 2017. Role of protein kinase N2 (PKN2) in cigarette smoke-mediated oncogenic transformation of oral cells

| Gene Symbol | Gene ID | Protein Description                                                           | Protein Accession | # Proteins | # Unique Peptides | # Peptides | # PSMs | OKF6/TERT1-Smoke/OKF6/TERT1-Parental (130/126) R1 | OKF6/TERT1-Smoke/OKF6/TERT1-Parental (128/127) R2 | Ratio Standard Errors [%]: OKF6/TERT1-Smoke/OKF6/TERT1-Parental (130/126) R1 | Ratio Standard Errors [%]: OKF6/TERT1-Smoke/OKF6/TERT1-Parental (128/127) R2 | Ratio Variabilities [%]: F13: OKF6/TERT1-Smoke/OKF6/TERT1-Parental (130/126) R1 | Ratio Variabilities [%]: F13: OKF6/TERT1-Smoke/OKF6/TERT1-Parental (128/127) R2 | Ratio Counts: F13: OKF6/TERT1-Smoke/OKF6/TERT1-Parental (130/126) R1 | Ratio Counts: F13: OKF6/TERT1-Smoke/OKF6/TERT1-Parental (128/127) R2 | HPRD ID | Entrez Gene ID | Gene Name                                                                     | Molecular Function                          | Primary Localization | Molecular Class                     | Biological Process                                                           | Domains                 | Plasma Proteome Database |
|-------------|---------|-------------------------------------------------------------------------------|-------------------|------------|-------------------|------------|--------|---------------------------------------------------|---------------------------------------------------|------------------------------------------------------------------------------|------------------------------------------------------------------------------|---------------------------------------------------------------------------------|---------------------------------------------------------------------------------|----------------------------------------------------------------------|----------------------------------------------------------------------|---------|----------------|-------------------------------------------------------------------------------|---------------------------------------------|----------------------|-------------------------------------|------------------------------------------------------------------------------|-------------------------|--------------------------|
| COP55       | 10987   | COP9 signalosome complex subunit 5                                            | NP_006828.2       | 1          | 6                 | 6          | 20     | 0.98                                              | 1.31                                              | 9.77                                                                         | 21.01                                                                        | 34.1                                                                            | 122                                                                             | 12                                                                   | 12                                                                   | 6888    | 10987          | COP9 constitutive photomorphogenic homologousubunit 5 (Arabidopsis)           | Ubiquitin-specific protease activity        | Nucleus              | Ubiquitin proteasome system protein | Protein metabolism                                                           | JAB                     | Yes                      |
| KLC3        | 147700  | kinesin light chain 3                                                         | NP_803136.2       | 1          | 5                 | 5          | 7      | 0.98                                              | 1.29                                              | 1.63                                                                         | 1.78                                                                         | 3.6                                                                             | 5.2                                                                             | 5                                                                    | 5                                                                    | 3212    | 147700         | None                                                                          | Motor activity                              | -                    | Motor protein                       | Cell growth and/or maintenance                                               | CC;TPR                  | No                       |
| DDB1        | 1642    | DNA damage-binding protein 1                                                  | NP_001914.3       | 1          | 40                | 40         | 110    | 0.98                                              | 1.26                                              | 2.93                                                                         | 3.22                                                                         | 23.4                                                                            | 33.7                                                                            | 65                                                                   | 65                                                                   | 10952   | 1642           | damage-specific DNA binding protein 1, 127kDa                                 | DNA repair protein                          | Cytoplasm            | DNA binding protein                 | Regulation of nucleohase, nucleoside, nucleotide and nucleic acid metabolism | -                       | Yes                      |
| KPNA4       | 3840    | importin subunit alpha-3                                                      | NP_002259.1       | 1          | 7                 | 11         | 35     | 0.98                                              | 1.25                                              | 2.88                                                                         | 4.1                                                                          | 9.4                                                                             | 17.1                                                                            | 11                                                                   | 11                                                                   | 4275    | 3840           | karyopherin alpha 4 (importin alpha 3)                                        | Transporter activity                        | Cytoplasm            | Transport/cargo protein             | Transport                                                                    | ARM                     | No                       |
| LTN1        | 26046   | E3 ubiquitin-protein ligase listerin                                          | NP_056380.2       | 1          | 3                 | 3          | 4      | 0.98                                              | 1.24                                              | 9.5                                                                          | 12.78                                                                        | 15.1                                                                            | 22.6                                                                            | 2                                                                    | 2                                                                    |         |                |                                                                               |                                             |                      |                                     |                                                                              |                         |                          |
| CSDE1       | 7812    | cold shock domain-containing protein E1 isoform 4                             | NP_001229820.1    | 4          | 15                | 15         | 29     | 0.98                                              | 1.23                                              | 9.38                                                                         | 4.94                                                                         | 39.5                                                                            | 25.5                                                                            | 17                                                                   | 17                                                                   | 15949   | 7812           | None                                                                          | RNA binding                                 | Cytoplasm            | RNA binding protein                 | Regulation of gene expression, epigenetic                                    | CSP                     | Yes                      |
| EIF3L       | 51386   | eukaryotic translation initiation factor 3 subunit L isoform 1                | NP_057175.1       | 2          | 20                | 20         | 53     | 0.98                                              | 1.22                                              | 5.94                                                                         | 4.02                                                                         | 31.7                                                                            | 26.4                                                                            | 28                                                                   | 28                                                                   | 10932   | 51386          | eukaryotic translation initiation factor 3, subunit 6 interacting protein     | Translation regulator activity              | Cytoplasm            | Translation regulatory protein      | Protein metabolism                                                           | -                       | No                       |
| MSTO1       | 55154   | protein misato homolog 1 isoform a                                            | NP_060586.2       | 3          | 2                 | 2          | 3      | 0.98                                              | 1.21                                              | 10.72                                                                        | 1.48                                                                         | 14.9                                                                            | 2.5                                                                             | 2                                                                    | 2                                                                    | 16904   | 55154          | None                                                                          | Molecular function unknown                  | -                    | Unclassified                        | Biological process unknown                                                   | -                       | No                       |
| EIF4E2      | 9470    | eukaryotic translation initiation factor 4E type 2 isoform A                  | NP_004837.1       | 4          | 3                 | 3          | 11     | 0.98                                              | 1.18                                              | 1.63                                                                         | 3.33                                                                         | 3.6                                                                             | 8.8                                                                             | 5                                                                    | 5                                                                    | 5798    | 9470           | eukaryotic translation initiation factor 4E isoform 2                         | Translation regulator activity              | Cytoplasm            | Translation regulatory protein      | Protein metabolism                                                           | -                       | Yes                      |
| PGRMC1      | 10857   | membrane-associated progesterone receptor component 1 isoform 1               | NP_006658.1       | 2          | 7                 | 7          | 20     | 0.98                                              | 1.18                                              | 7.27                                                                         | 7.11                                                                         | 22.8                                                                            | 27                                                                              | 10                                                                   | 10                                                                   | 2338    | 10857          | progesterone receptor membrane component 1                                    | Receptor activity                           | Plasma membrane      | Cell surface receptor               | Cell communication,Signal transduction                                       | TM,CC                   | Yes                      |
| FIX1        | 24147   | four-jointed box protein 1 precursor                                          | NP_055159.2       | 1          | 1                 | 1          | 2      | 0.98                                              | 1.16                                              | 1.16                                                                         | 1.16                                                                         | 1.16                                                                            | 1.16                                                                            | 1                                                                    | 1                                                                    | 16897   | 24147          | four jointed box 1 (Drosophila)                                               | Molecular function unknown                  | -                    | Unclassified                        | Biological process unknown                                                   | SP                      | No                       |
| EIF5B       | 9669    | eukaryotic translation initiation factor 5B                                   | NP_056988.3       | 1          | 26                | 26         | 63     | 0.98                                              | 1.16                                              | 3.51                                                                         | 4.34                                                                         | 20.2                                                                            | 30                                                                              | 34                                                                   | 34                                                                   | 7304    | 9669           | eukaryotic translation initiation factor 5B                                   | Translation regulator activity              | Cytoplasm            | Translation regulatory protein      | Protein metabolism                                                           | CC,GTP-EFTU;GTP-EFTU_D2 | Yes                      |
| NNMT        | 4837    | nicotinamide N-methyltransferase                                              | NP_006160.1       | 1          | 5                 | 5          | 15     | 0.98                                              | 1.16                                              | 15.13                                                                        | 11.86                                                                        | 44                                                                              | 40.5                                                                            | 8                                                                    | 8                                                                    | 2478    | 4837           | nicotinamide N-methyltransferase                                              | Methyltransferase activity                  | Cytoplasm            | Enzyme: Methyltransferase           | Metabolism;Energy pathways                                                   | -                       | Yes                      |
| ADPRHL2     | 54936   | poly(ADP-ribose) glycohydrolase ARH3                                          | NP_060295.1       | 1          | 1                 | 1          | 4      | 0.98                                              | 1.16                                              | 5.53                                                                         | 7.2                                                                          | 7.6                                                                             | 11.8                                                                            | 2                                                                    | 2                                                                    | 12432   | 54936          | ADP-ribose glycohydrolase like 2                                              | Hydrolase activity                          | -                    | Enzyme: Hydrolase                   | Metabolism;Energy pathways                                                   | SP                      | No                       |
| COL6A1      | 1291    | collagen alpha-1(VI) chain precursor                                          | NP_001839.2       | 1          | 1                 | 1          | 1      | 0.98                                              | 1.15                                              | 1.15                                                                         | 1.15                                                                         | 1.15                                                                            | 1.15                                                                            | 1                                                                    | 1                                                                    | 370     | 1291           | collagen, type VI alpha 1                                                     | Extracellular matrix structural constituent | Extracellular        | Extracellular matrix protein        | Cell growth and/or maintenance                                               | VWA,COLL,SP             | Yes                      |
| ECHDC1      | 55862   | ethylmalonyl-CoA decarboxylase isoform 5                                      | NP_001132982.1    | 5          | 6                 | 6          | 15     | 0.98                                              | 1.14                                              | 9.27                                                                         | 5.26                                                                         | 26                                                                              | 17.1                                                                            | 8                                                                    | 8                                                                    | 13260   | 55862          | enoyl Coenzyme A hydratase domain containing 1                                | Molecular function unknown                  | -                    | Unclassified                        | Biological process unknown                                                   | -                       | Yes                      |
| CTSC        | 1075    | dipeptidyl peptidase 1 isoform a peppeproteasin                               | NP_001805.3       | 1          | 4                 | 4          | 13     | 0.98                                              | 1.14                                              | 9.81                                                                         | 9.81                                                                         | 25.9                                                                            | 30.3                                                                            | 7                                                                    | 7                                                                    | 3841    | 1075           | cathepsin C                                                                   | Cysteine-type peptidase activity            | Lysosome             | Cysteine protease                   | Protein metabolism                                                           | PPTC1;SP                | Yes                      |
| PSMA4       | 5685    | proteasome subunit alpha type-4 isoform 1                                     | NP_002780.1       | 2          | 10                | 10         | 62     | 0.98                                              | 1.14                                              | 2.17                                                                         | 3.28                                                                         | 11.8                                                                            | 21                                                                              | 31                                                                   | 31                                                                   | 10168   | 5685           | proteasome (prosome, macropain) subunit, alpha type 4                         | Ubiquitin-specific protease activity        | Cytoplasm            | Ubiquitin proteasome system protein | Protein metabolism                                                           | CC                      | Yes                      |
| CDK13       | 8621    | cyclin-dependent kinase 13 isoform 1                                          | NP_003709.3       | 47         | 3                 | 4          | 21     | 0.98                                              | 1.13                                              | 2.04                                                                         | 7.43                                                                         | 3.4                                                                             | 14.6                                                                            | 3                                                                    | 3                                                                    | 4496    | 8621           | cell division cycle 2-like 5(cholinesterase-related cell division controller) | Protein serine/threonine kinase activity    | Nucleus,Cytoplasm    | Serine/threonine kinase             | Cell communication,Signal transduction                                       | S_T_kinase              | Yes                      |
| ACACA       | 31      | acetyl-CoA carboxylase 1 isoform 1                                            | NP_942131.1       | 5          | 31                | 31         | 68     | 0.98                                              | 1.1                                               | 2.68                                                                         | 2.46                                                                         | 16.4                                                                            | 16.9                                                                            | 38                                                                   | 38                                                                   | 1938    | 31             | acetyl-Coenzyme A carboxylase alpha                                           | Ligase activity                             | Cytoplasm,Nucleus    | Enzyme: Carboxylase                 | Metabolism;Energy pathways                                                   | -                       | Yes                      |
| CSTF3       | 1479    | cleavage stimulation factor subunit 3 isoform 1                               | NP_001317.1       | 2          | 4                 | 4          | 8      | 0.98                                              | 1.09                                              | 2.66                                                                         | 5.97                                                                         | 5.8                                                                             | 14.6                                                                            | 5                                                                    | 5                                                                    | 2651    | 1479           | cleavage stimulation factor, 3 pre-RNA subunit 3, 77kDa                       | RNA binding                                 | Nucleus              | RNA binding protein                 | RNA metabolism                                                               | NLS,HAT                 | Yes                      |
| GAK         | 2580    | cyclin-G-associated kinase isoform 1                                          | NP_005246.2       | 2          | 10                | 10         | 21     | 0.98                                              | 1.09                                              | 10.24                                                                        | 12.65                                                                        | 35.9                                                                            | 50.8                                                                            | 12                                                                   | 12                                                                   | 3631    | 2580           | cyclin G associated kinase                                                    | Protein serine/threonine kinase activity    | Cytoplasm            | Serine/threonine kinase             | Cell communication,Signal transduction                                       | SP;DNAI3_T_kinase       | Yes                      |
| DNAJA3      | 9093    | dnaJ homolog subfamily A member 3, mitochondrial isoform 1                    | NP_005138.3       | 3          | 4                 | 4          | 9      | 0.98                                              | 1.08                                              | 7.4                                                                          | 14.36                                                                        | 16.3                                                                            | 35.9                                                                            | 5                                                                    | 5                                                                    | 9758    | 9093           | DnaJ (Hsp40) homolog, subfamily A, member 3                                   | Chaperone activity                          | Mitochondrion        | Chaperone                           | Apoptosis                                                                    | DNAJ;SP                 | Yes                      |
| OXNAD1      | 92106   | oxidoreductase NAD-binding domain-containing protein 1 precursor              | NP_612390.1       | 1          | 2                 | 2          | 6      | 0.98                                              | 1.07                                              | 2.71                                                                         | 5.7                                                                          | 4.6                                                                             | 10.6                                                                            | 3                                                                    | 3                                                                    | 14446   | 92106          | None                                                                          | Molecular function unknown                  | -                    | Unclassified                        | Biological process unknown                                                   | -                       | No                       |
| PPME1       | 51400   | protein phosphatase methyltransferase 1 isoform b                             | NP_001258522.1    | 2          | 9                 | 9          | 23     | 0.98                                              | 1.07                                              | 5.65                                                                         | 8.91                                                                         | 19.4                                                                            | 34.1                                                                            | 12                                                                   | 12                                                                   | 17864   | 51400          | None                                                                          | Methyltransferase activity                  | -                    | Enzyme: Methyltransferase           | Metabolism;Energy pathways                                                   | ABH                     | Yes                      |
| B3GAT3      | 26229   | galactosylgalactosylxylosylprotein 3-beta-glucuronosyltransferase 3 isoform 1 | NP_036332.2       | 4          | 1                 | 1          | 2      | 0.98                                              | 1.06                                              | 1.06                                                                         | 1.06                                                                         | 1.06                                                                            | 1.06                                                                            | 1                                                                    | 1                                                                    | 7564    | 26229          | beta-1,3-galactosyltransferase 3(galactosyltransferase 3)                     | Transferase activity                        | Golgi apparatus      | Integral membrane protein           | Metabolism;Energy pathways                                                   | TM                      | Yes                      |
| VCPIP1      | 80124   | deubiquitinating protein VCPIP135                                             | NP_079330.2       | 1          | 4                 | 4          | 6      | 0.98                                              | 1.05                                              | 9.21                                                                         | 13.43                                                                        | 12.8                                                                            | 20.1                                                                            | 2                                                                    | 2                                                                    | 15645   | 80124          | valosin containing protein (p97)/p47 complexinteracting protein 1             | Ubiquitin-specific protease activity        | Cytoplasm            | Ubiquitin proteasome system protein | Protein metabolism                                                           | -                       | Yes                      |

Supplementary Table S1. List of quantified proteins in OKF6/TERT1-Smoke cells  
 Raigonalan *et al.*, 2017. Role of protein kinase N2 (PKN2) in cigarette smoke-mediated oncogenic transformation of oral cells

| Gene Symbol | Gene ID | Protein Description                                                           | Protein Accession | # Proteins | # Unique Peptides | # Peptides | # PSMs | OKF6/TERT1-Smoke/<br>OKF6/TERT1-Parental<br>(130/126) R1 | OKF6/TERT1-Smoke/<br>OKF6/TERT1-Parental<br>(128/127) R2 | Ratio Standard Errors [%]:<br>OKF6/TERT1-Smoke/<br>OKF6/TERT1-Parental<br>(130/126) R1 | Ratio Standard Errors [%]:<br>OKF6/TERT1-Smoke/<br>OKF6/TERT1-Parental<br>(128/127) R2 | Ratio Variabilities [%]:<br>F13: OKF6/TERT1-<br>Smoke/<br>OKF6/TERT1-Parental<br>(130/126) R1 | Ratio Variabilities [%]:<br>F13: OKF6/TERT1-<br>Smoke/<br>OKF6/TERT1-Parental<br>(128/127) R2 | Ratio Counts: F13:<br>OKF6/TERT1-Smoke/<br>OKF6/TERT1-Parental<br>(130/126) R1 | Ratio Counts: F13:<br>OKF6/TERT1-Smoke/<br>OKF6/TERT1-Parental<br>(128/127) R2 | HPRD ID | Entrez Gene ID | Gene Name                                                                                     | Molecular Function                           | Primary Localization  | Molecular Class                    | Biological Process                                               | Domains           | Plasma Proteome Database |
|-------------|---------|-------------------------------------------------------------------------------|-------------------|------------|-------------------|------------|--------|----------------------------------------------------------|----------------------------------------------------------|----------------------------------------------------------------------------------------|----------------------------------------------------------------------------------------|-----------------------------------------------------------------------------------------------|-----------------------------------------------------------------------------------------------|--------------------------------------------------------------------------------|--------------------------------------------------------------------------------|---------|----------------|-----------------------------------------------------------------------------------------------|----------------------------------------------|-----------------------|------------------------------------|------------------------------------------------------------------|-------------------|--------------------------|
| AP1M1       | 8907    | AP-1 complex subunit mu-1 isoform 1                                           | NP_001123996.1    | 2          | 7                 | 9          | 29     | 0.98                                                     | 1.05                                                     | 4.55                                                                                   | 7.02                                                                                   | 14.8                                                                                          | 24.7                                                                                          | 11                                                                             | 11                                                                             | 4639    | 8907           | adaptor-related protein complex 1 mu 1 subunit                                                | Receptor signaling complex scaffold activity | Golgi apparatus       | Adapter molecule                   | Cell communication;Signal transduction                           | -                 | Yes                      |
| GTPBP1      | 9567    | GTP-binding protein 1                                                         | NP_004277.2       | 1          | 9                 | 9          | 20     | 0.98                                                     | 1.04                                                     | 4.56                                                                                   | 3.53                                                                                   | 14.9                                                                                          | 12.2                                                                                          | 11                                                                             | 11                                                                             | 3765    | 9567           | GTP binding protein 1                                                                         | GTPase activity                              | Cytoplasm             | GTPase                             | Cell communication;Signal transduction                           | -                 | Yes                      |
| PTCD3       | 55037   | pentatricopeptide repeat domain-containing protein 3, mitochondrial precursor | NP_060422.4       | 3          | 13                | 13         | 33     | 0.98                                                     | 1.03                                                     | 5.7                                                                                    | 5.68                                                                                   | 21.2                                                                                          | 23                                                                                            | 14                                                                             | 15                                                                             | 8631    | 55037          | None                                                                                          | Protein binding                              | -                     | Unclassified                       | Biological_process unknown                                       | -                 | Yes                      |
| NDUFA4      | 29078   | NADH dehydrogenase [ubiquinone] 1 alpha subcomplex assembly factor 4          | NP_054884.1       | 1          | 3                 | 3          | 5      | 0.98                                                     | 1.03                                                     | 1.03                                                                                   |                                                                                        |                                                                                               |                                                                                               | 1                                                                              | 1                                                                              | 10795   | 29078          | chromosome 6 open reading frame 66                                                            | Molecular function unknown                   | -                     | Cell cycle control protein         | Cell communication;Signal transduction                           | -                 | Yes                      |
| GORASP1     | 64689   | Golgi reassembly-stacking protein 1 isoform 1                                 | NP_114105.1       | 2          | 1                 | 1          | 1      | 0.98                                                     | 1.02                                                     | 1.02                                                                                   |                                                                                        |                                                                                               |                                                                                               | 1                                                                              | 1                                                                              | 6038    | 64689          | golgi reassembly stacking protein 1 65kDa                                                     | Structural molecule activity                 | Golgi apparatus       | Structural protein                 | Cell growth and/or maintenance                                   | -                 | Yes                      |
| KIAA1598    | 57698   | shootin-1 isoform a                                                           | NP_001120683.1    | 5          | 6                 | 6          | 11     | 0.98                                                     | 1.01                                                     | 11.55                                                                                  | 3.23                                                                                   | 28.4                                                                                          | 8                                                                                             | 6                                                                              | 6                                                                              | 11155   | 57698          | KIAA1598                                                                                      | Molecular function unknown                   | -                     | Unclassified                       | Biological_process unknown                                       | CC                | No                       |
| SRFBP1      | 153443  | serum response factor-binding protein 1                                       | NP_689759.2       | 1          | 2                 | 2          | 5      | 0.98                                                     | 1                                                        | 0.27                                                                                   | 1.29                                                                                   | 0.5                                                                                           | 2.2                                                                                           | 3                                                                              | 3                                                                              | 8685    | 153443         | serum response factor binding protein 1                                                       | Transcription regulator activity             | Nucleus               | Transcription regulator protein    | Metabolism                                                       | CC                | No                       |
| UPF1        | 5976    | regulator of nonsense transcripts 1 isoform 1                                 | NP_001284478.1    | 2          | 32                | 32         | 89     | 0.98                                                     | 1                                                        | 3.36                                                                                   | 3.51                                                                                   | 22.5                                                                                          | 23.9                                                                                          | 45                                                                             | 45                                                                             | 3254    | 5976           | regulator of nonsense transcripts 1                                                           | Helicase activity                            | Cytoplasm;Nucleus     | RNA binding protein                | Regulation of translation;RNA metabolism                         | ZNF2,ZnF,C4,DEAD  | Yes                      |
| SORD        | 6652    | sorbitol dehydrogenase                                                        | NP_003095.2       | 1          | 7                 | 7          | 26     | 0.98                                                     | 1                                                        | 4.84                                                                                   | 3.16                                                                                   | 16.6                                                                                          | 11                                                                                            | 12                                                                             | 12                                                                             | 1679    | 6652           | sorbitol dehydrogenase                                                                        | Catalytic activity                           | Plasma membrane       | Enzyme: Dehydrogenase              | Metabolism;Energy pathways                                       | -                 | Yes                      |
| LMAN1       | 3998    | protein ERGIC-53 precursor                                                    | NP_005561.1       | 1          | 13                | 14         | 42     | 0.98                                                     | 0.99                                                     | 5.74                                                                                   | 5.26                                                                                   | 24.9                                                                                          | 23                                                                                            | 19                                                                             | 19                                                                             | 3338    | 3998           | lectin, mannose-binding 1                                                                     | Chaperone activity                           | Endoplasmic reticulum | Chaperone                          | Protein metabolism                                               | TM;SP;CC          | Yes                      |
| RPS20       | 6224    | 40S ribosomal protein S20 isoform 1                                           | NP_001139699.1    | 2          | 4                 | 5          | 22     | 0.98                                                     | 0.99                                                     | 3.97                                                                                   | 4.99                                                                                   | 13                                                                                            | 16.5                                                                                          | 11                                                                             | 11                                                                             | 4728    | 6224           | ribosomal protein S20                                                                         | Structural constituent of ribosome           | Ribosome              | Ribosomal subunit                  | Protein metabolism                                               | -                 | Yes                      |
| NMT2        | 9397    | glycylpeptide N-tetradecanoyltransferase 2 isoform 1                          | NP_004799.1       | 2          | 1                 | 4          | 7      | 0.98                                                     | 0.99                                                     | 0.99                                                                                   |                                                                                        |                                                                                               |                                                                                               | 1                                                                              | 1                                                                              | 11948   | 9397           | N-myristoyltransferase 2                                                                      | Transferase activity                         | Cytoplasm             | Enzyme: Transferase                | Metabolism;Energy pathways                                       | -                 | Yes                      |
| ARHGAP1     | 392     | rho GTPase-activating protein 1                                               | NP_004299.1       | 1          | 17                | 17         | 58     | 0.98                                                     | 0.99                                                     | 6.6                                                                                    | 3.72                                                                                   | 34.6                                                                                          | 19.3                                                                                          | 27                                                                             | 27                                                                             | 4108    | 392            | Rho GTPase activating protein 1                                                               | GTPase activator activity                    | Cytoplasm             | GTPase activating protein          | Cell communication;Signal transduction                           | SEC14;RHOGAP      | Yes                      |
| PYCR2       | 29920   | pyroline-5-carboxylate reductase 2 isoform 1                                  | NP_037460.2       | 2          | 5                 | 6          | 19     | 0.98                                                     | 0.98                                                     | 2.63                                                                                   | 7.21                                                                                   | 7.8                                                                                           | 21.5                                                                                          | 9                                                                              | 9                                                                              | 17939   | 29920          | pyroline-5-carboxylate reductase family member 2                                              | Molecular function unknown                   | Mitochondrion         | Unclassified                       | Biological_process unknown                                       | -                 | No                       |
| UNC45A      | 55898   | protein unc-45 homolog A isoform 2                                            | NP_061141.2       | 2          | 21                | 21         | 49     | 0.98                                                     | 0.97                                                     | 3.31                                                                                   | 4.81                                                                                   | 16.4                                                                                          | 23.6                                                                                          | 25                                                                             | 25                                                                             | 18070   | 55898          | None                                                                                          | Molecular function unknown                   | Nucleus               | Unclassified                       | Biological_process unknown                                       | TPR;ARM           | Yes                      |
| KLC1        | 3831    | kinesin light chain 1 isoform 3                                               | NP_001123579.1    | 4          | 6                 | 11         | 20     | 0.98                                                     | 0.97                                                     | 6.06                                                                                   | 4.91                                                                                   | 14.6                                                                                          | 11.7                                                                                          | 6                                                                              | 6                                                                              | 2489    | 3831           | kinesin 2 60/70kDa                                                                            | Motor activity                               | Cytoplasm             | Motor protein                      | Signal transduction                                              | TPR;CC            | Yes                      |
| NXN         | 64359   | nucleoredoxin isoform 1                                                       | NP_071908.2       | 2          | 9                 | 9          | 39     | 0.98                                                     | 0.97                                                     | 5.49                                                                                   | 8.63                                                                                   | 23.1                                                                                          | 36.7                                                                                          | 18                                                                             | 18                                                                             | 14858   | 64359          | nucleoredoxin                                                                                 | Oxidoreductase activity                      | Nucleus               | Enzyme: Oxidoreductase             | Metabolism;Energy pathways                                       | -                 | Yes                      |
| DDX42       | 11325   | ATP-dependent RNA helicase DDX42                                              | NP_031398.2       | 1          | 15                | 15         | 37     | 0.98                                                     | 0.97                                                     | 4.08                                                                                   | 5.62                                                                                   | 17                                                                                            | 22.8                                                                                          | 18                                                                             | 17                                                                             | 9909    | 11325          | DEAD (Asp-Glu-Ala-Asp) box polypeptide 42                                                     | RNA binding                                  | Nucleus               | RNA binding protein                | Regulation of nucleobase, nucleotide and nucleic acid metabolism | CC;DEXD;HELIC     | Yes                      |
| GALNT7      | 51809   | N-acetylgalactosaminyltransferase 7                                           | NP_059119.2       | 1          | 7                 | 7          | 17     | 0.98                                                     | 0.97                                                     | 7.88                                                                                   | 7.28                                                                                   | 20.5                                                                                          | 18.9                                                                                          | 7                                                                              | 7                                                                              | 10386   | 51809          | UDP-N-acetyl-alpha-D-galactosamine:polypeptideN-acetylgalactosaminyltransferase 7 (GalNAc-T7) | Transferase activity                         | Integral to membrane  | Enzyme: Transferase                | Metabolism;Energy pathways                                       | TM                | Yes                      |
| VPS26A      | 9559    | vacuolar protein sorting-associated protein 26A isoform 1                     | NP_004887.2       | 2          | 9                 | 9          | 25     | 0.98                                                     | 0.97                                                     | 5.96                                                                                   | 18.21                                                                                  | 22.2                                                                                          | 74.4                                                                                          | 14                                                                             | 14                                                                             | 8385    | 9559           | vacuolar protein sorting 26 (yeast)                                                           | Transporter activity                         | Cytoplasm             | Transport/cargo protein            | Transport                                                        | -                 | Yes                      |
| EIF3F       | 8665    | eukaryotic translation initiation factor 3 subunit F                          | NP_003745.1       | 1          | 9                 | 9          | 25     | 0.98                                                     | 0.97                                                     | 5.17                                                                                   | 8                                                                                      | 19.2                                                                                          | 29.6                                                                                          | 14                                                                             | 14                                                                             | 4887    | 8665           | eukaryotic translation initiation factor 3 subunit 5 epsilon, 47kDa                           | Translation regulator activity               | Cytoplasm             | Translation regulatory protein     | Protein metabolism                                               | JAB               | Yes                      |
| CDK9        | 1025    | cyclin-dependent kinase 9                                                     | NP_001252.1       | 50         | 5                 | 7          | 35     | 0.98                                                     | 0.97                                                     | 5.1                                                                                    | 10.63                                                                                  | 13.2                                                                                          | 27.7                                                                                          | 7                                                                              | 7                                                                              | 16016   | 1025           | cyclin-dependent kinase 9 (CDC2-related kinase)                                               | Protein serine/threonine kinase activity     | Nucleus;Cytoplasm     | Serine/threonine kinase            | Regulation of nucleobase, nucleotide and nucleic acid metabolism | S,T_kinase        | Yes                      |
| GTPBP4      | 23560   | nuclear GTP-binding protein 1                                                 | NP_036473.2       | 1          | 14                | 14         | 25     | 0.98                                                     | 0.96                                                     | 2.86                                                                                   | 9.08                                                                                   | 10.9                                                                                          | 34.9                                                                                          | 15                                                                             | 15                                                                             | 9976    | 23560          | GTP binding protein 4                                                                         | GTPase activity                              | Nucleus               | GTPase                             | Cell communication;Signal transduction                           | CC                | Yes                      |
| SBN01       | 55206   | protein strawberry notch homolog 1 isoform 1                                  | NP_001161328.1    | 2          | 1                 | 1          | 2      | 0.98                                                     | 0.96                                                     | 0.96                                                                                   |                                                                                        |                                                                                               |                                                                                               | 1                                                                              | 1                                                                              | 11533   | 55206          | sno, strawberry notch homolog 1 (Drosophila)                                                  | Molecular function unknown                   | -                     | Unclassified                       | Biological_process unknown                                       | SP;CC;HELIC       | No                       |
| OPA1        | 4976    | dynamitin-like 120 kDa protein, mitochondrial isoform 8                       | NP_570850.2       | 8          | 16                | 16         | 56     | 0.98                                                     | 0.95                                                     | 3.41                                                                                   | 5.13                                                                                   | 18.1                                                                                          | 26.8                                                                                          | 29                                                                             | 29                                                                             | 5596    | 4976           | optic atrophy 1 (autosomal dominant)                                                          | GTPase activity                              | Mitochondrion         | GTPase                             | Cell communication;Signal transduction                           | DYNC;CC           | Yes                      |
| SMS         | 6611    | spermine synthase isoform 1                                                   | NP_004586.2       | 2          | 8                 | 8          | 25     | 0.98                                                     | 0.95                                                     | 6.87                                                                                   | 9.67                                                                                   | 26.5                                                                                          | 36.6                                                                                          | 15                                                                             | 15                                                                             | 2115    | 6611           | spermine synthase                                                                             | Transferase activity                         | -                     | Enzyme: Synthase                   | Metabolism;Energy pathways                                       | -                 | No                       |
| AKAP13      | 11214   | A-kinase anchor protein 13 isoform 1                                          | NP_006729.4       | 3          | 9                 | 9          | 14     | 0.98                                                     | 0.94                                                     | 2.36                                                                                   | 6.41                                                                                   | 6.5                                                                                           | 17.2                                                                                          | 8                                                                              | 8                                                                              | 5253    | 11214          | A kinase (PKA) anchor protein 13                                                              | Guanyl-nucleotide exchange factor activity   | Plasma membrane       | Guanine nucleotide exchange factor | Cell communication;Signal transduction                           | SP;CC;1;RHOGEF;PH | Yes                      |
| CRTAP       | 10491   | cartilage-associated protein precursor                                        | NP_006362.1       | 1          | 3                 | 3          | 4      | 0.98                                                     | 0.94                                                     | 5.92                                                                                   | 37.52                                                                                  | 10.1                                                                                          | 67.4                                                                                          | 3                                                                              | 3                                                                              | 16110   | 10491          | cartilage associated protein                                                                  | Molecular function unknown                   | Cytoplasm             | Unclassified                       | Biological_process unknown                                       | SP                | Yes                      |
| RPS2        | 6187    | 40S ribosomal protein S2                                                      | NP_002943.2       | 1          | 15                | 16         | 85     | 0.98                                                     | 0.94                                                     | 3.39                                                                                   | 3.66                                                                                   | 21.2                                                                                          | 21.9                                                                                          | 40                                                                             | 40                                                                             | 4690    | 6187           | ribosomal protein S2                                                                          | Structural constituent of ribosome           | Ribosome              | Ribosomal subunit                  | Protein metabolism                                               | -                 | Yes                      |
| PFN2        | 5217    | profilin-2 isoform b                                                          | NP_002619.1       | 2          | 3                 | 3          | 5      | 0.98                                                     | 0.92                                                     | 8.89                                                                                   | 6.57                                                                                   | 15.2                                                                                          | 10.5                                                                                          | 3                                                                              | 3                                                                              | 1451    | 5217           | profilin 2                                                                                    | Structural molecule activity                 | Cytoplasm             | Structural protein                 | Cell growth and/or maintenance                                   | PROF              | Yes                      |

Supplementary Table S1. List of quantified proteins in OKF6/TERT1-Smoke cells  
 Raingopaln *et al.*, 2017. Role of protein kinase N2 (PKN2) in cigarette smoke-mediated oncogenic transformation of oral cells

| Gene Symbol | Gene ID   | Protein Description                                                                                                 | Protein Accession | # Proteins | # Unique Peptides | # Peptides | # PSMs | OKF6/TERT1-Smoke/<br>OKF6/TERT1-Parental<br>(130/126) R1 | OKF6/TERT1-Smoke/<br>OKF6/TERT1-Parental<br>(128/127) R2 | Ratio Standard Errors [%]:<br>OKF6/TERT1-Smoke/<br>OKF6/TERT1-Parental<br>(130/126) R1 | Ratio Standard Errors [%]:<br>OKF6/TERT1-Smoke/<br>OKF6/TERT1-Parental<br>(128/127) R2 | Ratio Variabilities [%]:<br>F13: OKF6/TERT1-<br>Smoke/<br>OKF6/TERT1-Parental<br>(130/126) R1 | Ratio Variabilities [%]:<br>F13: OKF6/TERT1-<br>Smoke/<br>OKF6/TERT1-Parental<br>(128/127) R2 | Ratio Counts: F13:<br>OKF6/TERT1-Smoke/<br>OKF6/TERT1-Parental<br>(130/126) R1 | Ratio Counts: F13:<br>OKF6/TERT1-Smoke/<br>OKF6/TERT1-Parental<br>(128/127) R2 | HPRD ID | Entrez Gene Id | Gene Name                                                                | Molecular Function                                             | Primary Localization    | Molecular Class                          | Biological Process                                                                                          | Domains           | Plasma Proteome Database |
|-------------|-----------|---------------------------------------------------------------------------------------------------------------------|-------------------|------------|-------------------|------------|--------|----------------------------------------------------------|----------------------------------------------------------|----------------------------------------------------------------------------------------|----------------------------------------------------------------------------------------|-----------------------------------------------------------------------------------------------|-----------------------------------------------------------------------------------------------|--------------------------------------------------------------------------------|--------------------------------------------------------------------------------|---------|----------------|--------------------------------------------------------------------------|----------------------------------------------------------------|-------------------------|------------------------------------------|-------------------------------------------------------------------------------------------------------------|-------------------|--------------------------|
| ILF3        | 3609      | interleukin enhancer-binding factor 3 isoform d                                                                     | NP_060090.2       | 7          | 32                | 32         | 131    | 0.98                                                     | 0.92                                                     | 4.71                                                                                   | 5.14                                                                                   | 39                                                                                            | 39.8                                                                                          | 66                                                                             | 66                                                                             | 4420    | 3609           | interleukin enhancer binding factor 3, 90kDa                             | Transcription factor activity;Transcription regulator activity | Nucleus                 | Transcription factor:RNA binding protein | Regulation of nucleobase, nucleotide, and nucleic acid metabolism;Regulation of gene expression, epigenetic | NLS;RBD;DZF;D SRM | Yes                      |
| NUP153      | 9972      | nuclear pore complex protein Nup153 isoform 1                                                                       | NP_001265138.1    | 3          | 13                | 13         | 21     | 0.98                                                     | 0.92                                                     | 6.9                                                                                    | 5.43                                                                                   | 26.6                                                                                          | 19.5                                                                                          | 15                                                                             | 15                                                                             | 4899    | 9972           | nucleoporin 153kDa                                                       | Transporter activity                                           | Nucleus                 | Transport/cargo protein                  | Transport                                                                                                   | ZnF_RBZ           | Yes                      |
| SIN3A       | 25942     | paired amphipathic helix protein Sin3a                                                                              | NP_001138829.1    | 1          | 3                 | 3          | 3      | 0.98                                                     | 0.91                                                     | 7.41                                                                                   | 5.39                                                                                   | 12.7                                                                                          | 8.5                                                                                           | 3                                                                              | 3                                                                              | 9690    | 25942          | SIN3 homolog A, transcription regulator (yeast)                          | Transcription regulator activity:DNA binding                   | Nucleus                 | Transcription regulatory protein         | Regulation of nucleobase, nucleotide, and nucleic acid metabolism                                           | PAH               | Yes                      |
| EEA1        | 8411      | early endosome antigen 1                                                                                            | NP_003557.2       | 1          | 37                | 37         | 73     | 0.98                                                     | 0.91                                                     | 2.99                                                                                   | 4.28                                                                                   | 19.4                                                                                          | 25.9                                                                                          | 43                                                                             | 43                                                                             | 5460    | 8411           | early endosome antigen 1, 162kD                                          | Auxiliary transport protein activity                           | Endosome                | Membrane transport protein               | Transport                                                                                                   | CC;ZNF2;FYY E     | Yes                      |
| AP3D1       | 8943      | AP-3 complex subunit delta-1 isoform 3                                                                              | NP_001248755.1    | 2          | 16                | 16         | 44     | 0.98                                                     | 0.91                                                     | 5.54                                                                                   | 5.1                                                                                    | 24.7                                                                                          | 21                                                                                            | 20                                                                             | 20                                                                             | 6260    | 8943           | adaptor-related protein complex 3, delta 1 subunit                       | Transporter activity                                           | Cytoplasm               | Transport/cargo protein                  | Transport                                                                                                   | ADAP              | Yes                      |
| LGALS3BP    | 3959      | galactin-3-binding protein precursor                                                                                | NP_005558.1       | 1          | 12                | 12         | 61     | 0.98                                                     | 0.91                                                     | 3.01                                                                                   | 3.98                                                                                   | 16.8                                                                                          | 20.8                                                                                          | 32                                                                             | 32                                                                             | 2796    | 3959           | lectin, galactoside-binding, soluble, B-binding protein                  | Extracellular matrix structural constituent                    | Extracellular           | Extracellular matrix protein             | Immune response                                                                                             | SP;SR             | Yes                      |
| SERPINB6    | 5269      | serpin B6 isoform d                                                                                                 | NP_001258752.1    | 4          | 15                | 15         | 60     | 0.98                                                     | 0.9                                                      | 3.31                                                                                   | 11.71                                                                                  | 17.6                                                                                          | 61.5                                                                                          | 29                                                                             | 29                                                                             | 1413    | 5269           | serine (or cysteine) proteinase inhibitor, clade B (ovalbumin), member 6 | Protease inhibitor activity                                    | Cytoplasm               | Protease inhibitor                       | Protein metabolism                                                                                          | SERPIN            | Yes                      |
| PPP1R8      | 5511      | nuclear inhibitor of protein phosphatase 1 isoform alpha                                                            | NP_054829.2       | 3          | 3                 | 3          | 5      | 0.98                                                     | 0.89                                                     | 0.58                                                                                   | 16.83                                                                                  | 1                                                                                             | 26.5                                                                                          | 3                                                                              | 3                                                                              | 4028    | 5511           | protein phosphatase 1, regulatory (inhibitor) subunit 8                  | RNA binding                                                    | Nucleus                 | Ribonuclease                             | RNA metabolism                                                                                              | FHA               | Yes                      |
| H2AFY       | 9555      | core histone macro-H2A.1 isoform 3                                                                                  | NP_613258.2       | 3          | 13                | 15         | 76     | 0.98                                                     | 0.89                                                     | 2.93                                                                                   | 3.5                                                                                    | 17.6                                                                                          | 19.2                                                                                          | 37                                                                             | 37                                                                             | 13624   | 9555           | H2A histone family, member Y                                             | DNA binding                                                    | Centrosome;Nucleus      | DNA binding protein                      | Regulation of nucleobase, nucleotide, and nucleic acid metabolism                                           | H2A;A1pp          | Yes                      |
| PRSS23      | 11098     | serine protease 23 isoform a                                                                                        | NP_009104.2       | 3          | 2                 | 2          | 4      | 0.98                                                     | 0.89                                                     | 19.56                                                                                  | 2.75                                                                                   | 27.6                                                                                          | 3.5                                                                                           | 2                                                                              | 2                                                                              | 7149    | 11098          | protease, serine, 23                                                     | Serine-type peptidase activity                                 | -                       | Serine protease                          | Protein metabolism                                                                                          | TRYPSIN;SP        | Yes                      |
| MAP7D1      | 55700     | MAP7 domain-containing protein 1 isoform 1                                                                          | NP_060537.3       | 3          | 15                | 15         | 30     | 0.98                                                     | 0.88                                                     | 7.63                                                                                   | 7.5                                                                                    | 30.5                                                                                          | 27                                                                                            | 16                                                                             | 16                                                                             | 7666    | 55700          | proline arginine rich coiled coil 1                                      | Molecular function unknown                                     | -                       | Unclassified                             | Biological process unknown                                                                                  | CC                | Yes                      |
| MYOF        | 26509     | myoferlin isoform a                                                                                                 | NP_038479.1       | 16         | 85                | 85         | 242    | 0.98                                                     | 0.87                                                     | 1.98                                                                                   | 3.07                                                                                   | 23.3                                                                                          | 32.2                                                                                          | 140                                                                            | 140                                                                            | 6857    | 26509          | fer-1-like 3, myoferlin (C. elegans)                                     | Molecular function unknown                                     | Plasma membrane;Nucleus | Integral membrane protein                | Cell growth and/or maintenance                                                                              | C2;SH3;NLS;TM     | Yes                      |
| CLASP2      | 23122     | CLIP-associated protein 2 isoform 1                                                                                 | NP_055912.2       | 1          | 1                 | 6          | 20     | 0.98                                                     | 0.87                                                     | 0.87                                                                                   | 0.87                                                                                   | 1                                                                                             | 1                                                                                             | 1                                                                              | 1                                                                              | 12054   | 23122          | cytoplasmic linker associated protein 2                                  | Cytoskeletal protein binding                                   | Cytoplasm               | Cytoskeletal associated protein          | Cell growth and/or maintenance                                                                              | -                 | No                       |
| ERGIC2      | 51290     | endoplasmic reticulum-Golgi intermediate compartment protein 2                                                      | NP_057654.2       | 1          | 2                 | 2          | 4      | 0.98                                                     | 0.87                                                     | 0.94                                                                                   | 27.56                                                                                  | 1.3                                                                                           | 35                                                                                            | 2                                                                              | 2                                                                              | 17932   | 51290          | None                                                                     | Molecular function unknown                                     | Nucleus                 | Unclassified                             | Biological process unknown                                                                                  | NLS               | Yes                      |
| TOMM6       | 100188893 | mitochondrial import receptor subunit TOM6 homolog                                                                  | NP_001127965.1    | 1          | 1                 | 1          | 6      | 0.98                                                     | 0.86                                                     | 1.45                                                                                   | 0.9                                                                                    | 2.5                                                                                           | 1.3                                                                                           | 3                                                                              | 3                                                                              | 19464   | 100188893      | translocase of outer mitochondrial membrane 6 homolog (yeast)            | Protein transporter activity                                   | Mitochondrial membrane  | Transport/cargo protein                  | Protein transport                                                                                           | -                 | No                       |
| APPL1       | 26060     | DCC-interacting protein 13-alpha                                                                                    | NP_036228.1       | 1          | 8                 | 8          | 13     | 0.98                                                     | 0.85                                                     | 3.58                                                                                   | 4.23                                                                                   | 9.3                                                                                           | 9.5                                                                                           | 7                                                                              | 7                                                                              | 5053    | 26060          | None                                                                     | Receptor signaling complex scaffold activity                   | Cytoplasm               | Adapter molecule                         | Cell communication;Signal transduction                                                                      | PH;PTB;CC         | No                       |
| NOC4L       | 79050     | nucleolar complex protein 4 homolog                                                                                 | NP_076983.1       | 1          | 7                 | 7          | 13     | 0.98                                                     | 0.85                                                     | 3.04                                                                                   | 18.09                                                                                  | 7.3                                                                                           | 42.3                                                                                          | 6                                                                              | 7                                                                              | 14543   | 79050          | None                                                                     | Molecular function unknown                                     | -                       | Unclassified                             | Biological process unknown                                                                                  | -                 | No                       |
| BROX        | 148362    | BRO1 domain-containing protein BROX isoform a                                                                       | NP_653296.2       | 3          | 7                 | 7          | 16     | 0.98                                                     | 0.85                                                     | 3.51                                                                                   | 3.11                                                                                   | 10.4                                                                                          | 7.5                                                                                           | 9                                                                              | 8                                                                              |         |                |                                                                          |                                                                |                         |                                          |                                                                                                             |                   |                          |
| RPL18       | 6141      | 60S ribosomal protein L18 isoform 1                                                                                 | NP_000970.1       | 2          | 7                 | 7          | 53     | 0.98                                                     | 0.82                                                     | 3.94                                                                                   | 4.52                                                                                   | 21.3                                                                                          | 20.6                                                                                          | 30                                                                             | 30                                                                             | 16046   | 6141           | ribosomal protein L18                                                    | Structural constituent of ribosome                             | Ribosome                | Ribosomal subunit                        | Protein metabolism                                                                                          | -                 | Yes                      |
| TAP1        | 6890      | antigen peptide transporter 1 isoform 1                                                                             | NP_000584.2       | 2          | 6                 | 6          | 23     | 0.98                                                     | 0.79                                                     | 9.28                                                                                   | 12.59                                                                                  | 32.4                                                                                          | 35.5                                                                                          | 12                                                                             | 12                                                                             | 1359    | 6890           | transporter 1, ATP binding cassette, sub-family B (MDR/TAP)              | Transporter activity                                           | Plasma membrane         | Transport/cargo protein                  | Transport                                                                                                   | TM;AAA            | Yes                      |
| TMEM230     | 29058     | transmembrane protein 230 isoform 1                                                                                 | NP_001009923.1    | 2          | 1                 | 1          | 2      | 0.98                                                     | 0.78                                                     | 0.78                                                                                   | 0.78                                                                                   | 1                                                                                             | 1                                                                                             | 1                                                                              | 1                                                                              |         |                |                                                                          |                                                                |                         |                                          |                                                                                                             |                   |                          |
| DBT         | 1629      | lipamide acyltransferase component of branched-chain alpha-keto acid dehydrogenase complex, mitochondrial precursor | NP_001909.3       | 1          | 5                 | 5          | 12     | 0.98                                                     | 0.78                                                     | 21.14                                                                                  | 63.46                                                                                  | 54.4                                                                                          | 183.2                                                                                         | 6                                                                              | 6                                                                              | 2010    | 1629           | dihydrolipamide branched chain transacylase E2                           | Acyltransferase activity                                       | Mitochondrion           | Enzyme: Acyltransferase                  | Metabolism;Energy pathway                                                                                   | SP                | Yes                      |
| TC2N        | 123036    | tandem C2 domains nuclear protein isoform 1                                                                         | NP_689545.1       | 2          | 2                 | 2          | 2      | 0.98                                                     | 0.77                                                     | 13.95                                                                                  | 33.94                                                                                  | 19.5                                                                                          | 38.5                                                                                          | 2                                                                              | 2                                                                              | 11375   | 123036         | membrane targeting (tandem) C2 domain-containing                         | Transporter activity                                           | Nucleus                 | Transport/cargo protein                  | Transport                                                                                                   | C2                | Yes                      |
| RABEP2      | 79874     | rab GTPase-binding effector protein 2                                                                               | NP_079092.2       | 1          | 2                 | 2          | 4      | 0.98                                                     | 0.76                                                     | 7.85                                                                                   | 21.99                                                                                  | 10.9                                                                                          | 23.9                                                                                          | 2                                                                              | 2                                                                              | 17948   | 79874          | rabaptin, RAB GTPase binding effector protein 2                          | GTPase activator activity                                      | Cytoplasm               | GTPase activating protein                | Transport                                                                                                   | CC                | No                       |
| TP53BP2     | 7159      | apoptosis-stimulating of p53 protein 2 isoform 1                                                                    | NP_001026855.2    | 2          | 3                 | 3          | 4      | 0.98                                                     | 0.75                                                     | 16.95                                                                                  | 4.2                                                                                    | 23.8                                                                                          | 4.5                                                                                           | 2                                                                              | 2                                                                              | 11803   | 7159           | tumor protein p53 binding protein, 2                                     | Protein binding                                                | Cytoplasm;Nucleus       | Cell cycle control protein               | Cell communication;Signal transduction                                                                      | ANK;SH3;CC;RA     | Yes                      |
| ACTC1       | 70        | actin, alpha cardiac muscle 1 poprotein                                                                             | NP_005150.1       | 4          | 2                 | 27         | 749    | 0.98                                                     | 0.75                                                     | 4.72                                                                                   | 27.92                                                                                  | 19.2                                                                                          | 105.2                                                                                         | 17                                                                             | 17                                                                             | 15      | 70             | actin, alpha, cardiac muscle                                             | Structural constituent of cytoskeleton                         | Cytoplasm               | Cytoskeletal protein                     | Cell growth and/or maintenance                                                                              | ACTIN             | Yes                      |
| IIFT3       | 3437      | interferon-induced protein with tetratricopeptide repeats 3 isoform a                                               | NP_001540.2       | 3          | 8                 | 9          | 22     | 0.98                                                     | 0.74                                                     | 6.47                                                                                   | 10.21                                                                                  | 19.2                                                                                          | 22.8                                                                                          | 9                                                                              | 9                                                                              | 5228    | 3437           | interferon-induced protein with tetratricopeptide repeats 3              | Molecular function unknown                                     | Cytoplasm               | Unclassified                             | Immune response                                                                                             | TPR               | Yes                      |

Supplementary Table S1. List of quantified proteins in OKF6/TERT1-Smoke cells  
 Raingonalan *et al.*, 2017. Role of protein kinase N2 (PKN2) in cigarette smoke-mediated oncogenic transformation of oral cells

| Gene Symbol | Gene ID | Protein Description                                                                  | Protein Accession | # Proteins | # Unique Peptides | # Peptides | # PSMs | OKF6/TERT1-Smoke/<br>OKF6/TERT1-Parental<br>(130/126) R1 | OKF6/TERT1-Smoke/<br>OKF6/TERT1-Parental<br>(128/127) R2 | Ratio Standard Errors [%]:<br>OKF6/TERT1-Smoke/<br>OKF6/TERT1-Parental<br>(130/126) R1 | Ratio Standard Errors [%]:<br>OKF6/TERT1-Smoke/<br>OKF6/TERT1-Parental<br>(128/127) R2 | Ratio Variabilities [%]:<br>F13: OKF6/TERT1-<br>Smoke/<br>OKF6/TERT1-Parental<br>(130/126) R1 | Ratio Variabilities [%]:<br>F13: OKF6/TERT1-<br>Smoke/<br>OKF6/TERT1-Parental<br>(128/127) R2 | Ratio Counts: F13:<br>OKF6/TERT1-Smoke/<br>OKF6/TERT1-Parental<br>(130/126) R1 | Ratio Counts: F13:<br>OKF6/TERT1-Smoke/<br>OKF6/TERT1-Parental<br>(128/127) R2 | HPRD ID | Entrez Gene ID | Gene Name                                                                                            | Molecular Function                                  | Primary Localization            | Molecular Class                     | Biological Process                                                           | Domains                   | Plasma Proteome Database |
|-------------|---------|--------------------------------------------------------------------------------------|-------------------|------------|-------------------|------------|--------|----------------------------------------------------------|----------------------------------------------------------|----------------------------------------------------------------------------------------|----------------------------------------------------------------------------------------|-----------------------------------------------------------------------------------------------|-----------------------------------------------------------------------------------------------|--------------------------------------------------------------------------------|--------------------------------------------------------------------------------|---------|----------------|------------------------------------------------------------------------------------------------------|-----------------------------------------------------|---------------------------------|-------------------------------------|------------------------------------------------------------------------------|---------------------------|--------------------------|
| CA12        | 771     | carbonic anhydrase 12 isoform 1 precursor                                            | NP_001209.1       | 3          | 5                 | 5          | 10     | 0.98                                                     | 0.73                                                     | 24.17                                                                                  | 47.4                                                                                   | 49.9                                                                                          | 78.6                                                                                          | 4                                                                              | 4                                                                              | 4464    | 771            | carbonic anhydrase XII                                                                               | Catalytic activity                                  | Plasma membrane                 | Enzyme: Carbonic anhydrase          | Metabolism;Energy pathways                                                   | SP;TM                     | Yes                      |
| MRPS36      | 92259   | 28S ribosomal protein S36, mitochondrial                                             | NP_150597.1       | 1          | 2                 | 2          | 4      | 0.98                                                     | 0.73                                                     | 16.39                                                                                  | 23.7                                                                                   | 23                                                                                            | 24.9                                                                                          | 2                                                                              | 2                                                                              | 17600   | 92259          | mitochondrial ribosomal protein S36                                                                  | Structural constituent of ribosome                  | Mitochondrion                   | Ribosomal subunit                   | Protein metabolism                                                           | -                         | Yes                      |
| MKI67       | 4288    | antigen Ki-67 isoform 1                                                              | NP_002408.3       | 2          | 6                 | 6          | 7      | 0.98                                                     | 0.71                                                     | 3.93                                                                                   | 15.72                                                                                  | 8.6                                                                                           | 25.3                                                                                          | 5                                                                              | 5                                                                              | 8902    | 4288           | antigen identified by monoclonal antibody Ki-67                                                      | Protein binding                                     | Nucleolus                       | Cell cycle control protein          | Cell communication;Signal transduction                                       | FHA                       | Yes                      |
| PTPRK       | 5796    | receptor-type tyrosine-protein phosphatase kappa isoform a precursor                 | NP_001129120.1    | 6          | 5                 | 5          | 9      | 0.98                                                     | 0.7                                                      | 3.37                                                                                   | 17.5                                                                                   | 7.4                                                                                           | 28                                                                                            | 5                                                                              | 5                                                                              | 3968    | 5796           | protein tyrosine phosphatase, receptor type, K                                                       | Receptor signaling protein tyrosine kinase activity | Plasma membrane                 | Receptor tyrosine phosphatase       | Cell communication;Signal transduction                                       | SP;MAM;IG;FN3;TM;Tyr_Phos | Yes                      |
| TP53B       | 9540    | quinone oxidoreductase PG3 isoform 1                                                 | NP_004872.2       | 2          | 4                 | 4          | 6      | 0.98                                                     | 0.67                                                     | 9.15                                                                                   | 7.62                                                                                   | 15.6                                                                                          | 8.9                                                                                           | 3                                                                              | 3                                                                              | 5527    | 9540           | tumor protein p53 inducible protein 3                                                                | Oxidoreductase activity                             | Cytoplasm                       | Cell cycle control protein          | Cell communication;Signal transduction                                       | -                         | Yes                      |
| ARAP1       | 116985  | arf-GAP with Rho-GAP domain, ANK repeat and PH domain-containing protein 1 isoform c | NP_001035207.1    | 3          | 1                 | 1          | 5      | 0.98                                                     | 0.64                                                     | 47.69                                                                                  | 10.86                                                                                  | 74                                                                                            | 9.8                                                                                           | 2                                                                              | 2                                                                              | 9440    | 116985         | centaurin, delta 2                                                                                   | GTPase activator activity                           | Golgi apparatus                 | GTase activating protein            | Cell communication;Signal transduction                                       | PH;ARFGAP;ANK;RHOGAP;RA   | Yes                      |
| SPTBN5      | 51332   | spectrin beta chain, non-erythrocytic 5                                              | NP_057726.4       | 1          | 1                 | 1          | 1      | 0.98                                                     | 0.63                                                     |                                                                                        |                                                                                        |                                                                                               |                                                                                               | 1                                                                              | 1                                                                              | 10438   | 51332          | spectrin, beta, non-erythrocytic 5                                                                   | Cytoskeletal protein binding                        | Cytoplasm                       | Cytoskeletal associated protein     | Cell growth and/or maintenance                                               | CH;SPECTRIN;C             | Yes                      |
| BTAF1       | 9044    | TATA-binding protein-associated factor 172                                           | NP_003963.1       | 1          | 1                 | 1          | 1      | 0.98                                                     | 0.58                                                     |                                                                                        |                                                                                        |                                                                                               |                                                                                               | 1                                                                              | 1                                                                              | 5546    | 9044           | BTAF1 RNA polymerase II, B-FTFD transcriptionfactor associated, 170kDa (Mot1 homolog, S. cerevisiae) | Transcription regulator activity                    | Nucleus                         | Transcription regulatory protein    | Regulation of nucleobase, nucleoside and nucleic acid metabolism             | -                         | Yes                      |
| PHLDA1      | 22822   | pleckstrin homology-like domain family A member 1                                    | NP_031376.3       | 1          | 2                 | 2          | 5      | 0.97                                                     | 1.72                                                     | 1.68                                                                                   | 0.03                                                                                   | 2.8                                                                                           | 0.1                                                                                           | 3                                                                              | 3                                                                              | 5625    | 22822          | pleckstrin homology-like domain, family A, member 1                                                  | Transcription factor activity                       | Cytoplasm                       | Transcription factor                | Protein metabolism;Apoptosis                                                 | PH                        | Yes                      |
| PTMA        | 5757    | prothymosin alpha isoform 2                                                          | NP_002814.3       | 4          | 7                 | 7          | 48     | 0.97                                                     | 1.53                                                     | 7.62                                                                                   | 2.84                                                                                   | 34.7                                                                                          | 20.1                                                                                          | 21                                                                             | 21                                                                             | 1778    | 5757           | prothymosin, alpha (gene sequence 28)                                                                | Molecular function unknown                          | Nucleus                         | Unclassified                        | Cell proliferation                                                           | CC;NLS                    | Yes                      |
| DUT         | 1854    | deoxyuridine 5'-triphosphate nucleotidylhydrolase, mitochondrial isoform 1 precursor | NP_001020419.1    | 3          | 3                 | 3          | 5      | 0.97                                                     | 1.46                                                     | 5.34                                                                                   | 4.98                                                                                   | 9                                                                                             | 12.7                                                                                          | 3                                                                              | 3                                                                              | 3165    | 1854           | dUTP pyrophosphatase                                                                                 | Hydrolase activity                                  | Cytoplasm;Nucleus;Mitochondrion | Enzyme: Hydrolase                   | DNA replication                                                              | NLS                       | Yes                      |
| RUVBL1      | 8607    | ruvB-like 1                                                                          | NP_003698.1       | 1          | 19                | 19         | 90     | 0.97                                                     | 1.44                                                     | 3.95                                                                                   | 3.3                                                                                    | 26.8                                                                                          | 33.4                                                                                          | 47                                                                             | 47                                                                             | 9143    | 8607           | RuvB-like 1 (E. coli)                                                                                | DNA binding                                         | Nucleus                         | DNA binding protein                 | Regulation of nucleobase, nucleoside, nucleotide and nucleic acid metabolism | AAA                       | Yes                      |
| DCTN4       | 51164   | dynactin subunit 4 isoform b                                                         | NP_057305.1       | 3          | 10                | 10         | 32     | 0.97                                                     | 1.37                                                     | 4.63                                                                                   | 10.84                                                                                  | 15.7                                                                                          | 54.9                                                                                          | 12                                                                             | 12                                                                             | 13126   | 51164          | dynactin 4 (p62)                                                                                     | Molecular function unknown                          | Cytoplasm                       | Unclassified                        | Biological process unknown                                                   | -                         | No                       |
| MYL12A      | 10627   | myosin regulatory light chain 12A isoform 2                                          | NP_001289978.1    | 3          | 5                 | 10         | 181    | 0.97                                                     | 1.37                                                     | 5.04                                                                                   | 4.8                                                                                    | 34.1                                                                                          | 47.3                                                                                          | 46                                                                             | 47                                                                             | 14735   | 10627          | None                                                                                                 | Calcium ion binding                                 | Cytoskeleton                    | Calcium binding protein             | Cell communication;Signal transduction                                       | EF                        | Yes                      |
| SAP30BP     | 29115   | SAP30-binding protein isoform 1                                                      | NP_001288784.1    | 3          | 3                 | 3          | 4      | 0.97                                                     | 1.37                                                     | 4.56                                                                                   | 15.88                                                                                  | 7.7                                                                                           | 38.9                                                                                          | 3                                                                              | 3                                                                              | 17094   | 29115          | None                                                                                                 | Transcription regulator activity                    | Nucleus                         | Transcription regulatory protein    | Biological process unknown                                                   | NLS                       | No                       |
| UFDIL       | 7353    | ubiquitin fusion degradation protein 1 homolog isoform A                             | NP_005650.2       | 2          | 6                 | 6          | 15     | 0.97                                                     | 1.34                                                     | 8.69                                                                                   | 14.13                                                                                  | 25.6                                                                                          | 61.9                                                                                          | 9                                                                              | 9                                                                              | 6778    | 7353           | ubiquitin fusion degradation 1-like                                                                  | Ubiquitin-specific protease activity                | Nucleus                         | Ubiquitin proteasome system protein | Protein metabolism                                                           | -                         | Yes                      |
| CEACAM1     | 634     | carcinoembryonic antigen-related cell adhesion molecule 1 isoform 1 precursor        | NP_001703.2       | 6          | 1                 | 1          | 2      | 0.97                                                     | 1.29                                                     |                                                                                        |                                                                                        |                                                                                               |                                                                                               | 1                                                                              | 1                                                                              | 191     | 634            | carcinoembryonic antigen-related cell adhesion molecule 1 (biliary glycoprotein)                     | Molecular function unknown                          | Plasma membrane                 | Adhesion molecule                   | Signal transduction                                                          | SP;IGC2;TM;Ig_LIKE;IG     | Yes                      |
| SLC7A5      | 8140    | large neutral amino acids transporter small subunit 1                                | NP_003477.4       | 1          | 4                 | 4          | 13     | 0.97                                                     | 1.26                                                     | 3.34                                                                                   | 5.47                                                                                   | 7.9                                                                                           | 17                                                                                            | 6                                                                              | 6                                                                              | 2552    | 8140           | solute carrier family 7 (cationic amino acid transporter, +/- system), member 5                      | Transporter activity                                | Plasma membrane                 | Transport/cargo protein             | Transport                                                                    | TM                        | Yes                      |
| USP47       | 55031   | ubiquitin carboxyl-terminal hydrolase 47 isoform a                                   | NP_001269588.1    | 2          | 7                 | 7          | 15     | 0.97                                                     | 1.22                                                     | 5.8                                                                                    | 7.86                                                                                   | 16                                                                                            | 27.6                                                                                          | 8                                                                              | 8                                                                              | 11668   | 55031          | ubiquitin specific protease 47                                                                       | Ubiquitin-specific protease activity                | -                               | Ubiquitin proteasome system protein | Protein metabolism                                                           | UCH;CC                    | No                       |
| HSPA1B      | 3304    | heat shock 70 kDa protein 1A/1B                                                      | NP_005337.2       | 1          | 26                | 35         | 266    | 0.97                                                     | 1.2                                                      | 2.84                                                                                   | 3.18                                                                                   | 28.5                                                                                          | 40.5                                                                                          | 103                                                                            | 104                                                                            | 6784    | 3304           | heat shock 70kDa protein 1B                                                                          | Chaperone activity                                  | Cytoplasm                       | Chaperone                           | Protein metabolism                                                           | CC                        | Yes                      |
| DHCR7       | 1717    | 7-dehydrocholesterol reductase                                                       | NP_001157289.1    | 1          | 4                 | 4          | 11     | 0.97                                                     | 1.2                                                      | 15.39                                                                                  | 0.41                                                                                   | 34.2                                                                                          | 1.1                                                                                           | 5                                                                              | 5                                                                              | 4174    | 1717           | 7-dehydrocholesterol reductase                                                                       | Catalytic activity                                  | Peroxisome                      | Enzyme: Reductase                   | Metabolism;Energy pathways                                                   | TM                        | Yes                      |
| NFKB1       | 4790    | nuclear factor NF-kappa-B p105 subunit isoform 1                                     | NP_003989.2       | 2          | 10                | 11         | 20     | 0.97                                                     | 1.18                                                     | 12.6                                                                                   | 7.46                                                                                   | 40                                                                                            | 28.5                                                                                          | 10                                                                             | 10                                                                             | 1238    | 4790           | nuclear factor of kappa light polypeptide geneenhancer in B cells 1 (p105)                           | Transcription factor activity                       | Nucleus                         | Transcription factor                | Regulation of nucleobase, nucleoside, nucleotide and nucleic acid metabolism | RHD;IPT;ANK;D EATH        | Yes                      |
| MRPL43      | 84545   | 39S ribosomal protein L43, mitochondrial isoform d                                   | NP_789764.1       | 5          | 3                 | 3          | 8      | 0.97                                                     | 1.18                                                     | 7.77                                                                                   | 2.57                                                                                   | 16.9                                                                                          | 6.8                                                                                           | 5                                                                              | 5                                                                              | 14762   | 84545          | mitochondrial ribosomal protein L43                                                                  | Structural constituent of ribosome                  | Mitochondrion                   | Ribosomal subunit                   | Protein metabolism                                                           | -                         | Yes                      |
| HMOX2       | 3163    | heme oxygenase 2 isoform a                                                           | NP_001273196.1    | 3          | 13                | 13         | 38     | 0.97                                                     | 1.16                                                     | 5.6                                                                                    | 9.41                                                                                   | 25.2                                                                                          | 53.1                                                                                          | 21                                                                             | 21                                                                             | 783     | 3163           | heme oxygenase (decvline) 2                                                                          | Catalytic activity                                  | Endoplasmic reticulum           | Enzyme: Oxygenase                   | Metabolism;Energy pathways                                                   | TM                        | Yes                      |
| RNMT        | 8731    | mRNA cap guanine-N7 methyltransferase isoform 1                                      | NP_001295192.1    | 2          | 4                 | 4          | 15     | 0.97                                                     | 1.15                                                     | 3.43                                                                                   | 11.69                                                                                  | 9.4                                                                                           | 39.6                                                                                          | 8                                                                              | 8                                                                              | 4622    | 8731           | RNA (guanine-7-N7 methyltransferase)                                                                 | RNA methyltransferase activity                      | Cytoplasm                       | RNA methyltransferase               | Regulation of nucleobase, nucleoside and nucleic acid metabolism             | -                         | No                       |
| GCAT        | 23464   | 2-amino-3-ketobutyrate coenzyme A ligase, mitochondrial isoform 1 precursor          | NP_001165161.1    | 2          | 2                 | 2          | 3      | 0.97                                                     | 1.15                                                     | 1.36                                                                                   | 10.04                                                                                  | 1.9                                                                                           | 16.4                                                                                          | 2                                                                              | 2                                                                              | 7602    | 23464          | glycine C-amino-3-ketobutyrate coenzyme A ligase)                                                    | Acyltransferase activity                            | Mitochondrion                   | Enzyme: Acyltransferase             | Metabolism;Energy pathways                                                   | -                         | Yes                      |





Supplementary Table S1. List of quantified proteins in OKF6/TERT1-Smoke cells  
Raijngalan et al., 2017, Role of protein kinase N2 (PKN2) in cigarette smoke-mediated oncogenic transformation of oral cells

| Gene Symbol  | Gene ID   | Protein Description                                               | Protein Accession | # Proteins | # Unique Peptides | # Peptides | # PSMs | OKF6/TERT1-Smoke/<br>OKF6/TERT1-Parental<br>(130/126) R1 | OKF6/TERT1-Smoke/<br>OKF6/TERT1-Parental<br>(128/127) R2 | Ratio Standard Errors [%]:<br>OKF6/TERT1-Smoke/<br>OKF6/TERT1-Parental<br>(130/126) R1 | Ratio Standard Errors [%]:<br>OKF6/TERT1-Smoke/<br>OKF6/TERT1-Parental<br>(128/127) R2 | Ratio Variabilities [%]:<br>F13: OKF6/TERT1-<br>Smoke/<br>OKF6/TERT1-Parental<br>(130/126) R1 | Ratio Variabilities [%]:<br>F13: OKF6/TERT1-<br>Smoke/<br>OKF6/TERT1-Parental<br>(128/127) R2 | Ratio Counts: F13:<br>OKF6/TERT1-Smoke/<br>OKF6/TERT1-Parental<br>(130/126) R1 | Ratio Counts: F13:<br>OKF6/TERT1-Smoke/<br>OKF6/TERT1-Parental<br>(128/127) R2 | HPRD ID | Entrez Gene Id | Gene Name                                                                                                                                 | Molecular Function                         | Primary Localization | Molecular Class                 | Biological Process                                                           | Domains              | Plasma Proteome Database |
|--------------|-----------|-------------------------------------------------------------------|-------------------|------------|-------------------|------------|--------|----------------------------------------------------------|----------------------------------------------------------|----------------------------------------------------------------------------------------|----------------------------------------------------------------------------------------|-----------------------------------------------------------------------------------------------|-----------------------------------------------------------------------------------------------|--------------------------------------------------------------------------------|--------------------------------------------------------------------------------|---------|----------------|-------------------------------------------------------------------------------------------------------------------------------------------|--------------------------------------------|----------------------|---------------------------------|------------------------------------------------------------------------------|----------------------|--------------------------|
| GTF2I        | 2969      | general transcription factor II-I isoform 1                       | NP_127492.1       | 8          | 17                | 17         | 28     | 0.97                                                     | 0.89                                                     | 3.05                                                                                   | 4.83                                                                                   | 13                                                                                            | 18.9                                                                                          | 19                                                                             | 19                                                                             | 3399    | 2969           | general transcription factor II, i                                                                                                        | Transcription factor activity              | Nucleus              | Transcription factor            | Regulation of nucleobase, nucleoside, nucleotide and nucleic acid metabolism | -                    | Yes                      |
| ASCC3        | 10973     | activating signal cointegrator 1 complex subunit 3 isoform a      | NP_006819.2       | 2          | 16                | 16         | 28     | 0.97                                                     | 0.89                                                     | 4.59                                                                                   | 7.36                                                                                   | 18                                                                                            | 26.7                                                                                          | 16                                                                             | 16                                                                             | 9980    | 10973          | activating signal cointegrator 1 complex subunit 3                                                                                        | Molecular function unknown                 | Nucleus              | Unclassified                    | Regulation of nucleobase, nucleoside, nucleotide and nucleic acid metabolism | CC,DEXDC,HELLIC      | Yes                      |
| EARS2        | 124454    | probable glutamate-tRNA ligase, mitochondrial isoform 2           | NP_001295140.1    | 2          | 2                 | 2          | 6      | 0.97                                                     | 0.89                                                     | 0.31                                                                                   | 36.73                                                                                  | 0.5                                                                                           | 61.4                                                                                          | 3                                                                              | 3                                                                              | 11174   | 124454         | None                                                                                                                                      | Molecular function unknown                 | -                    | Unclassified                    | Biological process unknown                                                   | -                    | No                       |
| ZC3HAV1      | 56829     | zinc finger CCCH-type antiviral protein 1 isoform 1               | NP_064504.2       | 2          | 20                | 21         | 44     | 0.97                                                     | 0.88                                                     | 7.69                                                                                   | 4.75                                                                                   | 34.2                                                                                          | 18.8                                                                                          | 20                                                                             | 20                                                                             | 9534    | 56829          | zinc finger CCCH-type, antiviral 1                                                                                                        | Defense/immunity protein activity          | Cytoplasm;Nucleus    | -                               | Immune response                                                              | SP                   | Yes                      |
| RPL10A       | 4736      | 60S ribosomal protein L10a                                        | NP_009035.3       | 1          | 10                | 10         | 58     | 0.97                                                     | 0.88                                                     | 4.85                                                                                   | 5.04                                                                                   | 27                                                                                            | 25.7                                                                                          | 32                                                                             | 32                                                                             | 10199   | 4736           | ribosomal protein L10a                                                                                                                    | Structural constituent of ribosome         | Ribosome             | Ribosomal subunit               | Protein metabolism                                                           | -                    | Yes                      |
| LARP7        | 51574     | la-related protein 7 isoform 2                                    | NP_001253968.1    | 2          | 9                 | 9          | 13     | 0.97                                                     | 0.88                                                     | 3.06                                                                                   | 7.98                                                                                   | 8.4                                                                                           | 20                                                                                            | 8                                                                              | 8                                                                              | 17095   | 51574          | None                                                                                                                                      | Molecular function unknown                 | -                    | Unclassified                    | Biological process unknown                                                   | LA,RRM,CC            | No                       |
| PTK2B        | 2185      | protein-tyrosine kinase 2-beta isoform a                          | NP_775266.1       | 2          | 6                 | 7          | 13     | 0.97                                                     | 0.88                                                     | 6.41                                                                                   | 11.49                                                                                  | 15.4                                                                                          | 25.2                                                                                          | 6                                                                              | 6                                                                              | 3131    | 2185           | PTK2B protein tyrosine kinase 2 beta                                                                                                      | Protein-tyrosine kinase activity           | Cytoplasm            | Tyrosine kinase                 | Signal transduction                                                          | B41,Tyr_Kinase,CC    | Yes                      |
| DKC1         | 1736      | H/ACA ribonucleoprotein complex subunit 4 isoform 1               | NP_001354.1       | 3          | 16                | 16         | 41     | 0.97                                                     | 0.88                                                     | 4.99                                                                                   | 6.46                                                                                   | 24                                                                                            | 28.3                                                                                          | 24                                                                             | 24                                                                             | 2129    | 1736           | dyskeratosis congenita 1, dyskerin                                                                                                        | RNA binding                                | Nucleus              | RNA binding protein             | Regulation of nucleobase, nucleoside, nucleotide and nucleic acid metabolism | NLS                  | Yes                      |
| METTL1       | 4234      | tRNA (guanine-N(7))-methyltransferase isoform a                   | NP_005362.3       | 1          | 4                 | 4          | 8      | 0.97                                                     | 0.88                                                     | 4.87                                                                                   | 18.07                                                                                  | 9.5                                                                                           | 32.8                                                                                          | 4                                                                              | 4                                                                              | 6834    | 4234           | methyltransferase like 1                                                                                                                  | RNA methyltransferase activity             | -                    | RNA methyltransferase           | Regulation of nucleobase, nucleoside, nucleotide and nucleic acid metabolism | -                    | Yes                      |
| MTHFD1       | 4522      | C-1-tetrahydrofolate synthase, cytoplasmic                        | NP_005947.3       | 1          | 42                | 42         | 135    | 0.97                                                     | 0.88                                                     | 2.39                                                                                   | 3.78                                                                                   | 19.9                                                                                          | 28.6                                                                                          | 72                                                                             | 72                                                                             | 1403    | 4522           | methylene tetrahydrofolate dehydrogenase (NADPH-dependent) 1, methylenetetrahydrofolate cyclohydrolase, formyltetrahydrofolate synthetase | Catalytic activity                         | Cytoplasm            | Enzyme: Dehydrogenase           | Metabolism;Energy pathways                                                   | -                    | Yes                      |
| THOC3        | 84321     | THO complex subunit 3                                             | NP_115737.1       | 1          | 3                 | 3          | 4      | 0.97                                                     | 0.88                                                     | 10.64                                                                                  | 11.61                                                                                  | 18                                                                                            | 17.8                                                                                          | 3                                                                              | 3                                                                              | 9497    | 84321          | THO complex 3                                                                                                                             | RNA binding                                | Nucleus              | RNA binding protein             | Regulation of nucleobase, nucleoside, nucleotide and nucleic acid metabolism | WD40                 | Yes                      |
| NCSTN        | 23385     | nicastrin isoform 1 precursor                                     | NP_056146.1       | 3          | 4                 | 4          | 10     | 0.97                                                     | 0.87                                                     | 6.11                                                                                   | 18.72                                                                                  | 13.3                                                                                          | 37.7                                                                                          | 5                                                                              | 5                                                                              | 5584    | 23385          | nicastrin                                                                                                                                 | Protein binding                            | Plasma membrane      | Integral membrane protein       | Cell communication;Signal transduction                                       | SP;TM                | Yes                      |
| TUBGCP3      | 10426     | gamma-tubulin complex component 3 isoform 1                       | NP_006313.1       | 4          | 9                 | 9          | 18     | 0.97                                                     | 0.87                                                     | 9.68                                                                                   | 13.62                                                                                  | 30.3                                                                                          | 38.7                                                                                          | 10                                                                             | 10                                                                             | 10289   | 10426          | tubulin, gamma complex associated protein 3                                                                                               | Cytoskeletal protein binding               | Centrosome           | Cytoskeletal associated protein | Cell growth and/or maintenance                                               | CC                   | Yes                      |
| AFG3L2       | 10939     | AFG3-like protein 2                                               | NP_006787.2       | 1          | 18                | 18         | 37     | 0.97                                                     | 0.87                                                     | 3.31                                                                                   | 6.62                                                                                   | 14.1                                                                                          | 25.5                                                                                          | 19                                                                             | 19                                                                             | 5205    | 10939          | AFG3 ATPase family gene 3-like 2 (yeast)                                                                                                  | ATPase activity                            | Mitochondrion        | ATPase                          | Transport                                                                    | AAA;TM               | Yes                      |
| LRRFP2       | 9209      | leucine-rich repeat flightless-interacting protein 2 isoform 3    | NP_001127841.1    | 4          | 4                 | 4          | 6      | 0.97                                                     | 0.87                                                     | 13.52                                                                                  | 5.86                                                                                   | 22.9                                                                                          | 8.9                                                                                           | 3                                                                              | 3                                                                              | 10061   | 9209           | leucine rich repeat (in FLIL) interacting protein 2                                                                                       | Molecular function unknown                 | Nucleus              | Unclassified                    | Biological process unknown                                                   | CC                   | Yes                      |
| CAPN7        | 23473     | calpain-7                                                         | NP_055111.1       | 1          | 2                 | 2          | 2      | 0.97                                                     | 0.87                                                     |                                                                                        |                                                                                        |                                                                                               |                                                                                               | 1                                                                              | 1                                                                              | 5908    | 23473          | calpain 7                                                                                                                                 | Cysteine-type peptidase activity           | Nucleus              | Cysteine protease               | Protein metabolism                                                           | CYSPC,CALPAIN,III,CC | Yes                      |
| VPS37B       | 79720     | vacuolar protein sorting-associated protein 37B                   | NP_078943.1       | 1          | 3                 | 3          | 8      | 0.97                                                     | 0.87                                                     | 6.53                                                                                   | 26.57                                                                                  | 11                                                                                            | 41.7                                                                                          | 3                                                                              | 3                                                                              | 7794    | 79720          | None                                                                                                                                      | Protein transporter activity               | Cytoplasm            | Transport/cargo protein         | Protein transport                                                            | -                    | Yes                      |
| MAN2A1       | 4124      | alpha-mannosidase 2                                               | NP_002363.2       | 1          | 8                 | 8          | 16     | 0.97                                                     | 0.87                                                     | 5.05                                                                                   | 7.23                                                                                   | 15.6                                                                                          | 20.1                                                                                          | 10                                                                             | 10                                                                             | 1110    | 4124           | mannosidase, alpha, class 2A, member 1                                                                                                    | Catalytic activity                         | Golgi apparatus      | Enzyme: Glycosidase             | Metabolism;Energy pathways                                                   | TM,CC                | Yes                      |
| LOC102723897 | 102723897 | LOW QUALITY PROTEIN: WAS protein family homolog 2-like isoform X7 | XP_011542112.1    | 2          | 2                 | 2          | 9      | 0.97                                                     | 0.86                                                     | 1.62                                                                                   | 5.99                                                                                   | 3.1                                                                                           | 10.3                                                                                          | 4                                                                              | 4                                                                              |         |                |                                                                                                                                           |                                            |                      |                                 |                                                                              |                      |                          |
| RPS6KA3      | 6197      | ribosomal protein S6 kinase alpha-3                               | NP_004577.1       | 21         | 4                 | 10         | 37     | 0.97                                                     | 0.85                                                     | 9.48                                                                                   | 10.9                                                                                   | 24.7                                                                                          | 25                                                                                            | 7                                                                              | 7                                                                              | 2092    | 6197           | ribosomal protein S6 kinase, 90kDa, polypeptide 3                                                                                         | Protein serine/threonine kinase activity   | Cytoplasm            | Serine/threonine kinase         | Cell communication;Signal transduction                                       | S_T_Kinase           | Yes                      |
| AR           | 367       | androgen receptor isoform 2                                       | NP_001011645.1    | 1          | 1                 | 1          | 2      | 0.97                                                     | 0.82                                                     | 21.3                                                                                   | 26.14                                                                                  | 29.9                                                                                          | 31.1                                                                                          | 2                                                                              | 2                                                                              | 2437    | 367            | androgen receptor (dihydrotestosterone receptor);testicular feminization; spinal and bulbar muscular atrophy; Kennedy disease             | Ligand-dependent nuclear receptor activity | Nucleus;Cytoplasm    | Nuclear receptor                | Cell communication;Signal transduction                                       | ZnF_4;CC,HOLI        | Yes                      |
| CASP4        | 837       | caspase-4 isoform alpha precursor                                 | NP_001216.1       | 3          | 3                 | 3          | 5      | 0.97                                                     | 0.82                                                     | 2.81                                                                                   | 38.36                                                                                  | 3.9                                                                                           | 47                                                                                            | 2                                                                              | 2                                                                              | 4047    | 837            | caspase 4, apoptosis-related cysteine protease                                                                                            | Cysteine-type peptidase activity           | Cytoplasm            | Cysteine protease               | Apoptosis                                                                    | CARD,CASC            | Yes                      |
| MFF          | 56947     | mitochondrial fission factor isoform a                            | NP_064579.3       | 7          | 5                 | 5          | 12     | 0.97                                                     | 0.82                                                     | 11                                                                                     | 9.91                                                                                   | 26.6                                                                                          | 20.1                                                                                          | 6                                                                              | 6                                                                              | 16653   | 56947          | chromosome 2 open reading frame 33                                                                                                        | Molecular function unknown                 | Integral to membrane | Integral membrane protein       | Biological process unknown                                                   | CC;TM                | Yes                      |
| CCDC120      | 90060     | coiled-coil domain-containing protein 120 isoform 1               | NP_001156793.2    | 4          | 1                 | 1          | 2      | 0.97                                                     | 0.82                                                     |                                                                                        |                                                                                        |                                                                                               |                                                                                               | 1                                                                              | 1                                                                              | 6595    | 90060          | None                                                                                                                                      | Molecular function unknown                 | -                    | Unclassified                    | Biological process unknown                                                   | CC                   | No                       |

Supplementary Table S1. List of quantified proteins in OKF6/TERT1-Smoke cells  
 Raigonalan *et al.*, 2017. Role of protein kinase N2 (PKN2) in cigarette smoke-mediated oncogenic transformation of oral cells

| Gene Symbol | Gene ID   | Protein Description                                                                        | Protein Accession | # Proteins | # Unique Peptides | # Peptides | # PSMs | OKF6/TERT1-Smoke/<br>OKF6/TERT1-Parental<br>(130/126) R1 | OKF6/TERT1-Smoke/<br>OKF6/TERT1-Parental<br>(128/127) R2 | Ratio Standard Errors [%]:<br>OKF6/TERT1-Smoke/<br>OKF6/TERT1-Parental<br>(130/126) R1 | Ratio Standard Errors [%]:<br>OKF6/TERT1-Smoke/<br>OKF6/TERT1-Parental<br>(128/127) R2 | Ratio Variabilities [%]:<br>F13: OKF6/TERT1-<br>Smoke/<br>OKF6/TERT1-Parental<br>(130/126) R1 | Ratio Variabilities [%]:<br>F13: OKF6/TERT1-<br>Smoke/<br>OKF6/TERT1-Parental<br>(128/127) R2 | Ratio Counts: F13:<br>OKF6/TERT1-Smoke/<br>OKF6/TERT1-Parental<br>(130/126) R1 | Ratio Counts: F13:<br>OKF6/TERT1-Smoke/<br>OKF6/TERT1-Parental<br>(128/127) R2 | HFPRD ID | Entrez Gene Id | Gene Name                                                                             | Molecular Function                                     | Primary Localization  | Molecular Class                     | Biological Process                                                           | Domains                   | Plasma Proteome Database |
|-------------|-----------|--------------------------------------------------------------------------------------------|-------------------|------------|-------------------|------------|--------|----------------------------------------------------------|----------------------------------------------------------|----------------------------------------------------------------------------------------|----------------------------------------------------------------------------------------|-----------------------------------------------------------------------------------------------|-----------------------------------------------------------------------------------------------|--------------------------------------------------------------------------------|--------------------------------------------------------------------------------|----------|----------------|---------------------------------------------------------------------------------------|--------------------------------------------------------|-----------------------|-------------------------------------|------------------------------------------------------------------------------|---------------------------|--------------------------|
| YKT6        | 10652     | synaptobrevin homolog YKT6                                                                 | NP_006546.1       | 1          | 6                 | 6          | 19     | 0.97                                                     | 0.81                                                     | 4.52                                                                                   | 4.21                                                                                   | 13.2                                                                                          | 10.3                                                                                          | 9                                                                              | 9                                                                              | 16205    | 10652          | None                                                                                  | Molecular function unknown                             | Endoplasmic reticulum | Integral membrane protein           | Transport                                                                    | -                         | No                       |
| STT3B       | 201595    | dolichyl-diphosphooligonaccharide-<br>protein glycosyltransferase subunit<br>STT3B         | NP_849193.1       | 1          | 9                 | 9          | 23     | 0.97                                                     | 0.81                                                     | 6.65                                                                                   | 10.64                                                                                  | 23.5                                                                                          | 31.7                                                                                          | 13                                                                             | 13                                                                             | 12268    | 201595         | None                                                                                  | Catalytic activity:Phosphoprotein phosphatase activity | Integral to membrane  | Integral membrane protein           | Biological process unknown                                                   | TM                        | No                       |
| UQCRCQ      | 27089     | cytochrome b-c1 complex subunit 8                                                          | NP_055217.2       | 1          | 4                 | 4          | 9      | 0.97                                                     | 0.81                                                     | 3.3                                                                                    | 8.1                                                                                    | 7.2                                                                                           | 14.8                                                                                          | 5                                                                              | 5                                                                              | 17941    | 27089          | None                                                                                  | Molecular function unknown                             | -                     | Unclassified                        | Biological process unknown                                                   | -                         | No                       |
| COG1        | 9382      | conserved oligomeric Golgi complex<br>subunit 1                                            | NP_061184.1       | 1          | 6                 | 6          | 12     | 0.97                                                     | 0.79                                                     | 23.26                                                                                  | 15.69                                                                                  | 59.6                                                                                          | 31.2                                                                                          | 6                                                                              | 6                                                                              | 7371     | 9382           | component of oligomeric golgi complex 1                                               | Structural molecule activity                           | Golgi apparatus       | Structural protein                  | Transport                                                                    | -                         | Yes                      |
| HAAO        | 23498     | 3-hydroxyanthranilate 3,4-<br>dioxygenase                                                  | NP_036337.2       | 1          | 1                 | 1          | 2      | 0.97                                                     | 0.79                                                     |                                                                                        |                                                                                        |                                                                                               |                                                                                               | 1                                                                              | 1                                                                              | 5158     | 23498          | 3-hydroxyanthranilate 3,4-dioxygenase                                                 | Catalytic activity                                     | Cytoplasm             | Enzyme: Oxygenase                   | Metabolism:Energy pathways                                                   | -                         | Yes                      |
| TRIP6       | 7205      | thyroid receptor-interacting protein 6                                                     | NP_003293.2       | 1          | 6                 | 6          | 9      | 0.97                                                     | 0.78                                                     | 8.93                                                                                   | 7.17                                                                                   | 17.4                                                                                          | 11.2                                                                                          | 4                                                                              | 4                                                                              | 4242     | 7205           | thyroid hormone receptor interactor 6                                                 | Transcription regulator activity                       | Nucleus               | Transcription regulatory protein    | Regulation of nucleobase, nucleoside, nucleotide and nucleic acid metabolism | LIM                       | Yes                      |
| PTPN23      | 25930     | tyrosine-protein phosphatase non-<br>receptor type 23 isoform 1                            | NP_056281.1       | 2          | 10                | 10         | 26     | 0.97                                                     | 0.78                                                     | 9.28                                                                                   | 15.63                                                                                  | 33.2                                                                                          | 46.4                                                                                          | 13                                                                             | 13                                                                             | 5959     | 25930          | protein tyrosine phosphatase, non-receptor type 23                                    | Protein tyrosine phosphatase activity                  | Cytoplasm             | Tyrosine phosphatase                | Cell communication:Signal transduction                                       | CC,Tyr_Phos               | Yes                      |
| OCLN        | 100506658 | occludin isoform a                                                                         | NP_002529.1       | 2          | 1                 | 1          | 1      | 0.97                                                     | 0.77                                                     |                                                                                        |                                                                                        |                                                                                               |                                                                                               | 1                                                                              | 1                                                                              | 4191     | 4950           | occludin                                                                              | Cell adhesion molecule activity                        | Plasma membrane       | Integral membrane protein           | Cell communication:Signal transduction                                       | TM,CC                     | No                       |
| TRIM56      | 81844     | E3 ubiquitin-protein ligase TRIM56                                                         | NP_112223.1       | 1          | 6                 | 6          | 15     | 0.97                                                     | 0.75                                                     | 4.57                                                                                   | 12.18                                                                                  | 11.8                                                                                          | 24.6                                                                                          | 7                                                                              | 7                                                                              | 10284    | 81844          | tripartite motif-containing 56                                                        | Transcription regulator activity                       | Nucleus               | Transcription regulatory protein    | Regulation of nucleobase, nucleoside, nucleotide and nucleic acid metabolism | RING,BOX,CC               | Yes                      |
| WIPF2       | 147179    | WAS/WASL-interacting protein<br>family member 2                                            | NP_573571.1       | 1          | 2                 | 2          | 2      | 0.97                                                     | 0.75                                                     |                                                                                        |                                                                                        |                                                                                               |                                                                                               | 1                                                                              | 1                                                                              | 18304    | 147179         | None                                                                                  | Cytoskeletal protein binding                           | Cytoskeleton          | Cytoskeletal associated protein     | Cell growth and/or maintenance                                               | WH2                       | Yes                      |
| PPP1R14B    | 26472     | protein phosphatase 1 regulatory<br>subunit 14B                                            | NP_619634.1       | 1          | 1                 | 1          | 3      | 0.97                                                     | 0.73                                                     | 7.8                                                                                    | 23.67                                                                                  | 13.1                                                                                          | 30.4                                                                                          | 3                                                                              | 3                                                                              | 18513    | 26472          | protein phosphatase 1, regulatory (inhibitor) subunit 14B                             | Phosphatase regulator activity                         | Cytoplasm             | Enzyme regulator                    | Metabolism:Energy pathways                                                   | SP,CC                     | Yes                      |
| PTGS1       | 5742      | prostaglandin G/H synthase 1 isoform<br>1 precursor                                        | NP_000953.2       | 6          | 2                 | 2          | 2      | 0.97                                                     | 0.71                                                     | 2.77                                                                                   | 47.25                                                                                  | 3.8                                                                                           | 50.5                                                                                          | 2                                                                              | 2                                                                              | 7518     | 5742           | prostaglandin-endoperoxide synthase 1 (prostaglandin G/H synthase and cyclooxygenase) | Catalytic activity                                     | Endoplasmic reticulum | Enzyme: Oxygenase                   | Lipid metabolism                                                             | EGF,TM                    | Yes                      |
| CDC42EP4    | 23580     | cdc42 effector protein 4                                                                   | NP_036253.2       | 1          | 1                 | 1          | 2      | 0.97                                                     | 0.58                                                     |                                                                                        |                                                                                        |                                                                                               |                                                                                               | 1                                                                              | 1                                                                              | 8383     | 23580          | CDC42 effector protein (Rho GTPase binding)                                           | Structural constituent of cytoskeleton                 | Cytoplasm             | Cytoskeletal protein                | Cell growth and/or maintenance                                               | -                         | Yes                      |
| SH2D3A      | 10045     | SH2 domain-containing protein 3A                                                           | NP_005481.2       | 1          | 1                 | 1          | 2      | 0.97                                                     | 0.56                                                     |                                                                                        |                                                                                        |                                                                                               |                                                                                               | 1                                                                              | 1                                                                              | 5283     | 10045          | SH2 domain containing 3A                                                              | Receptor signaling complex scaffold activity           | -                     | Adapter molecule                    | Cell communication:Signal transduction                                       | SH2                       | No                       |
| SPCS3       | 60559     | signal peptidase complex subunit 3                                                         | NP_068747.1       | 1          | 4                 | 4          | 14     | 0.96                                                     | 1.78                                                     | 10.59                                                                                  | 6.05                                                                                   | 29.3                                                                                          | 31.2                                                                                          | 8                                                                              | 8                                                                              | 8001     | 60559          | signal peptidase complex subunit 3 homolog (S.cerevisiae)                             | Protease activator activity                            | -                     | Protease                            | Protein metabolism:Protein modification                                      | SP                        | No                       |
| OXSM        | 54995     | 3-oxoacyl-[acyl-carrier-protein]<br>synthase, mitochondrial isoform 1<br>precursor         | NP_060367.1       | 2          | 1                 | 1          | 1      | 0.96                                                     | 1.63                                                     |                                                                                        |                                                                                        |                                                                                               |                                                                                               | 1                                                                              | 1                                                                              | 7931     | 54995          | None                                                                                  | Molecular function unknown                             | -                     | Unclassified                        | Biological process unknown                                                   | SP                        | No                       |
| GPX4        | 2879      | phospholipid hydroperoxide<br>glutathione peroxidase, mitochondrial<br>isoform C precursor | NP_001034937.1    | 3          | 2                 | 2          | 4      | 0.96                                                     | 1.27                                                     | 2.19                                                                                   | 3.72                                                                                   | 3                                                                                             | 6.7                                                                                           | 2                                                                              | 2                                                                              | 11819    | 2879           | glutathione peroxidase 4 (phospholipidhydroperoxidase)                                | Peroxidase activity                                    | Mitochondrion         | Enzyme: Peroxidase                  | Metabolism:Energy pathways                                                   | SP                        | Yes                      |
| UBL4A       | 8266      | ubiquitin-like protein 4A                                                                  | NP_055050.1       | 1          | 3                 | 3          | 10     | 0.96                                                     | 1.24                                                     | 1.98                                                                                   | 7.47                                                                                   | 4.6                                                                                           | 23.1                                                                                          | 6                                                                              | 6                                                                              | 2417     | 8266           | ubiquitin-like 4                                                                      | Ubiquitin-specific protease activity                   | -                     | Ubiquitin proteasome system protein | Protein metabolism                                                           | UBQ                       | Yes                      |
| LDHA        | 3939      | L-lactate dehydrogenase A chain<br>isoform 3                                               | NP_001158886.1    | 7          | 22                | 25         | 220    | 0.96                                                     | 1.23                                                     | 4.26                                                                                   | 3.03                                                                                   | 44.7                                                                                          | 40.7                                                                                          | 110                                                                            | 110                                                                            | 1025     | 3939           | lactate dehydrogenase A                                                               | Catalytic activity                                     | Cytoplasm             | Enzyme: Dehydrogenase               | Metabolism:Energy pathways                                                   | -                         | Yes                      |
| PSMC3       | 5702      | 26S protease regulatory subunit 6A                                                         | NP_002795.2       | 1          | 15                | 15         | 62     | 0.96                                                     | 1.21                                                     | 3.87                                                                                   | 6.34                                                                                   | 21.7                                                                                          | 46.1                                                                                          | 33                                                                             | 33                                                                             | 1733     | 5702           | proteasome (prosome, macropain) 26S subunit,ATPase, 3                                 | Ubiquitin-specific protease activity                   | Nucleus               | Ubiquitin proteasome system protein | Protein metabolism                                                           | AAA                       | Yes                      |
| SON         | 6651      | protein SON isoform F                                                                      | NP_620305.2       | 4          | 15                | 15         | 32     | 0.96                                                     | 1.21                                                     | 6.57                                                                                   | 9.62                                                                                   | 26.4                                                                                          | 50.7                                                                                          | 17                                                                             | 17                                                                             | 1678     | 6651           | SON DNA binding protein                                                               | Transcription factor activity                          | Nucleus               | Transcription factor                | Regulation of nucleobase, nucleoside, nucleotide and nucleic acid metabolism | COLL,CC,DSRM,G_PATCH      | Yes                      |
| HDAC1       | 3065      | histone deacetylase 1                                                                      | NP_004955.2       | 1          | 5                 | 8          | 25     | 0.96                                                     | 1.2                                                      | 1.86                                                                                   | 4.08                                                                                   | 4.7                                                                                           | 13                                                                                            | 7                                                                              | 7                                                                              | 3143     | 3065           | histone deacetylase 1                                                                 | Transcription regulator activity                       | Nucleus               | Transcription regulatory protein    | Regulation of nucleobase, nucleoside, nucleotide and nucleic acid metabolism | -                         | Yes                      |
| IGFBP2      | 3485      | insulin-like growth factor-binding<br>protein 2 precursor                                  | NP_000588.2       | 1          | 1                 | 1          | 1      | 0.96                                                     | 1.19                                                     |                                                                                        |                                                                                        |                                                                                               |                                                                                               | 1                                                                              | 1                                                                              | 898      | 3485           | insulin-like growth factor binding protein 2,3kDa                                     | Growth factor activity                                 | Extracellular         | Secreted polypeptide                | Cell communication:Signal transduction                                       | SP,IB,THYRO               | Yes                      |
| CARD10      | 29775     | casein recruitment domain-<br>containing protein 10                                        | NP_055365.2       | 1          | 1                 | 1          | 1      | 0.96                                                     | 1.18                                                     |                                                                                        |                                                                                        |                                                                                               |                                                                                               | 1                                                                              | 1                                                                              | 6233     | 29775          | casein recruitment domain family, member 10                                           | Receptor signaling complex scaffold activity           | Plasma membrane       | Adapter molecule                    | Apoptosis                                                                    | CC,CARD,PDZ,S_H3,GaKinase |                          |
| HGS         | 9146      | hepatocyte growth factor-regulated<br>tyrosine kinase substrate                            | NP_004703.1       | 1          | 10                | 10         | 16     | 0.96                                                     | 1.18                                                     | 15.23                                                                                  | 12.81                                                                                  | 43.1                                                                                          | 44.6                                                                                          | 8                                                                              | 8                                                                              | 5085     | 9146           | hepatocyte growth factor-regulated tyrosinekinase substrate                           | Receptor signaling complex scaffold activity           | Cytoplasm             | Adapter molecule                    | Cell communication:Signal transduction                                       | VHS,FVFE,UM,CC            | Yes                      |

Supplementary Table S1. List of quantified proteins in OKF6/TERT1-Smoke cells  
 Raingopaln *et al.*, 2017. Role of protein kinase N2 (PKN2) in cigarette smoke-mediated oncogenic transformation of oral cells

| Gene Symbol | Gene ID | Protein Description                                                                       | Protein Accession | # Proteins | # Unique Peptides | # Peptides | # PSMs | OKF6/TERT1-Smoke/<br>OKF6/TERT1-Parental<br>(130/126) R1 | OKF6/TERT1-Smoke/<br>OKF6/TERT1-Parental<br>(128/127) R2 | Ratio Standard Errors [%]:<br>OKF6/TERT1-Smoke/<br>OKF6/TERT1-Parental<br>(130/126) R1 | Ratio Standard Errors [%]:<br>OKF6/TERT1-Smoke/<br>OKF6/TERT1-Parental<br>(128/127) R2 | Ratio Variabilities [%]:<br>F13: OKF6/TERT1-<br>Smoke/<br>OKF6/TERT1-Parental<br>(130/126) R1 | Ratio Variabilities [%]:<br>F13: OKF6/TERT1-<br>Smoke/<br>OKF6/TERT1-Parental<br>(128/127) R2 | Ratio Counts: F13:<br>OKF6/TERT1-Smoke/<br>OKF6/TERT1-Parental<br>(130/126) R1 | Ratio Counts: F13:<br>OKF6/TERT1-Smoke/<br>OKF6/TERT1-Parental<br>(128/127) R2 | HPRD ID | Entrez Gene ID | Gene Name                                                                        | Molecular Function                           | Primary Localization  | Molecular Class                                            | Biological Process                                                                            | Domains        | Plasma Proteome Database |
|-------------|---------|-------------------------------------------------------------------------------------------|-------------------|------------|-------------------|------------|--------|----------------------------------------------------------|----------------------------------------------------------|----------------------------------------------------------------------------------------|----------------------------------------------------------------------------------------|-----------------------------------------------------------------------------------------------|-----------------------------------------------------------------------------------------------|--------------------------------------------------------------------------------|--------------------------------------------------------------------------------|---------|----------------|----------------------------------------------------------------------------------|----------------------------------------------|-----------------------|------------------------------------------------------------|-----------------------------------------------------------------------------------------------|----------------|--------------------------|
| AIMP1       | 9255    | aminoacyl tRNA synthase complex-interacting multifunctional protein 1 isoform b precursor | NP_001135888.1    | 2          | 10                | 10         | 23     | 0.96                                                     | 1.17                                                     | 3.66                                                                                   | 5.35                                                                                   | 13.2                                                                                          | 23.7                                                                                          | 14                                                                             | 14                                                                             | 4676    | 9255           | small inducible cytokine subfamily E, member 1 (endothelial monocyte-activating) | Cytokine activity                            | Extracellular         | Cytokine                                                   | Immune response                                                                               | CC,SP          | Yes                      |
| GATB        | 5188    | glutamyl-tRNA(Gln) amidotransferase subunit B, mitochondrial precursor                    | NP_004555.1       | 1          | 4                 | 4          | 4      | 0.96                                                     | 1.15                                                     | 12.2                                                                                   | 7.98                                                                                   | 20.5                                                                                          | 16                                                                                            | 3                                                                              | 3                                                                              |         |                |                                                                                  |                                              |                       |                                                            |                                                                                               |                |                          |
| PYRL        | 65263   | pyroline-5-carboxylate reductase 3                                                        | NP_075566.2       | 1          | 1                 | 1          | 4      | 0.96                                                     | 1.14                                                     | 11.38                                                                                  | 12.4                                                                                   | 15.6                                                                                          | 20.2                                                                                          | 2                                                                              | 2                                                                              | 15196   | 65263          | pyroline-5-carboxylate reductase-like                                            | Oxidoreductase activity                      | -                     | Enzyme: Oxidoreductase                                     | Metabolism;Energy pathways                                                                    | -              | No                       |
| XPO1        | 7514    | exportin-1                                                                                | NP_003391.1       | 1          | 29                | 29         | 104    | 0.96                                                     | 1.13                                                     | 3.21                                                                                   | 6.11                                                                                   | 22.2                                                                                          | 52.3                                                                                          | 51                                                                             | 51                                                                             | 3975    | 7514           | exportin 1 (CRM1 homolog, yeast)                                                 | Transporter activity                         | Nucleus               | Transport/cargo protein                                    | Cell communication;Signal transduction                                                        | IBN,NT         | Yes                      |
| DAXX        | 1616    | death domain-associated protein 6 isoform b                                               | NP_001135442.1    | 3          | 1                 | 1          | 2      | 0.96                                                     | 1.13                                                     | 1.13                                                                                   |                                                                                        |                                                                                               |                                                                                               | 1                                                                              | 1                                                                              | 4424    | 1616           | death-associated protein 6                                                       | Receptor signaling complex scaffold activity | Nucleus               | Adapter molecule                                           | Cell communication;Signal transduction                                                        | NLS,CC         | Yes                      |
| RAB11B      | 9230    | ras-related protein Rab-11B                                                               | NP_004209.2       | 3          | 11                | 11         | 44     | 0.96                                                     | 1.13                                                     | 4.46                                                                                   | 4.22                                                                                   | 21.7                                                                                          | 24.2                                                                                          | 25                                                                             | 25                                                                             | 5009    | 9230           | RAB11B, member RAS oncogene family                                               | GTPase activator activity                    | Nucleus               | GTPase activating protein                                  | Cell communication;Signal transduction                                                        | RAB            | No                       |
| PREB        | 10113   | prolactin regulatory element-binding protein                                              | NP_037520.1       | 1          | 5                 | 5          | 11     | 0.96                                                     | 1.13                                                     | 3.19                                                                                   | 0.82                                                                                   | 7.5                                                                                           | 2.3                                                                                           | 6                                                                              | 6                                                                              | 16216   | 10113          | prolactin regulatory element binding                                             | Transcription factor activity                | Endoplasmic reticulum | Transcription factor                                       | Regulation of nucleobase, nucleoside, nucleotide and nucleic acid metabolism                  | SP;WD40,TM     | Yes                      |
| TMED10      | 10972   | transmembrane emp24 domain-containing protein 10 precursor                                | NP_006818.3       | 1          | 9                 | 9          | 38     | 0.96                                                     | 1.12                                                     | 9.16                                                                                   | 17.45                                                                                  | 41                                                                                            | 107.4                                                                                         | 20                                                                             | 20                                                                             | 12013   | 10972          | None                                                                             | Transporter activity                         | Integral to membrane  | Integral membrane protein                                  | Transport                                                                                     | TM;SP          | Yes                      |
| ITPR2       | 3709    | inositol 1,4,5-trisphosphate receptor type 2                                              | NP_002214.2       | 1          | 4                 | 10         | 16     | 0.96                                                     | 1.12                                                     | 14.44                                                                                  | 17.24                                                                                  | 24.3                                                                                          | 34.3                                                                                          | 3                                                                              | 3                                                                              | 2536    | 3709           | inositol 1,4,5-trisphosphate receptor, type 2                                    | Transporter activity                         | Plasma membrane       | Transport/cargo protein                                    | Cell communication;Signal transduction                                                        | MIR;RYDR;TM;CC | Yes                      |
| PDLIM4      | 8572    | PDZ and LIM domain protein 4 isoform 1                                                    | NP_003678.2       | 2          | 3                 | 3          | 5      | 0.96                                                     | 1.12                                                     | 16.38                                                                                  | 20.2                                                                                   | 27.8                                                                                          | 40.9                                                                                          | 3                                                                              | 3                                                                              | 4571    | 8572           | PDZ and LIM domain 4                                                             | Molecular function unknown                   | Cytoplasm             | Unclassified                                               | Cell communication;Signal transduction                                                        | LIM;PDZ        | Yes                      |
| PACSIN3     | 29763   | protein kinase C and casein kinase substrate in neurons protein 3                         | NP_001171904.1    | 1          | 11                | 11         | 25     | 0.96                                                     | 1.11                                                     | 5.51                                                                                   | 6.85                                                                                   | 18.6                                                                                          | 26.8                                                                                          | 12                                                                             | 12                                                                             | 5937    | 29763          | protein kinase C and casein kinase substrate in neurons 3                        | Receptor signaling complex scaffold activity | Cytoplasm             | Adapter molecule                                           | Cell communication;Signal transduction                                                        | FCH;CC;SH3     | Yes                      |
| ETV6        | 2120    | transcription factor ETV6                                                                 | NP_001978.1       | 1          | 1                 | 1          | 2      | 0.96                                                     | 1.11                                                     | 1.11                                                                                   |                                                                                        |                                                                                               |                                                                                               | 1                                                                              | 1                                                                              | 15976   | 2120           | ets variant gene 6 (TEL oncogene)                                                | Transcription factor activity                | Nucleus               | Transcription factor                                       | Regulation of nucleobase, nucleoside, nucleotide and nucleic acid metabolism                  | SAM;PNT;ETS    | Yes                      |
| RPE         | 6120    | ribulose-phosphate 3-epimerase isoform 1                                                  | NP_954699.1       | 3          | 1                 | 1          | 2      | 0.96                                                     | 1.11                                                     | 1.11                                                                                   |                                                                                        |                                                                                               |                                                                                               | 1                                                                              | 1                                                                              | 1608    | 6120           | ribulose-5-phosphate-3-epimerase                                                 | Racemase and epimerase activity              | Cytoplasm             | Enzyme: Epimerase                                          | Metabolism;Energy pathways                                                                    | -              | Yes                      |
| ATP6V1C1    | 528     | V-type proton ATPase subunit C 1                                                          | NP_001686.1       | 1          | 9                 | 9          | 15     | 0.96                                                     | 1.1                                                      | 4.32                                                                                   | 8.68                                                                                   | 11.7                                                                                          | 27.4                                                                                          | 8                                                                              | 8                                                                              | 4371    | 528            | ATPase, H+-transporting, lysosomal 42kDa, V1 subunit C, isoform 1                | ATPase activity                              | -                     | ATPase                                                     | Transport                                                                                     | CC             | Yes                      |
| NUF2        | 83540   | kinetochore protein Nuf2                                                                  | NP_113611.2       | 1          | 1                 | 1          | 1      | 0.96                                                     | 1.1                                                      | 1.1                                                                                    |                                                                                        |                                                                                               |                                                                                               | 1                                                                              | 1                                                                              | 10817   | 83540          | cell division cycle associated 1                                                 | Cytoskeletal protein binding                 | Kinetochore           | Cytoskeletal associated protein;Cell cycle control protein | Cell communication;Signal transduction;Spindle assembly;Chromosome segregation                | CC             | Yes                      |
| MSMO1       | 6307    | methylsterol monooxygenase 1 isoform 1                                                    | NP_006736.1       | 2          | 1                 | 1          | 3      | 0.96                                                     | 1.1                                                      | 1.1                                                                                    |                                                                                        |                                                                                               |                                                                                               | 1                                                                              | 1                                                                              |         |                |                                                                                  |                                              |                       |                                                            |                                                                                               |                |                          |
| TEX264      | 51368   | testis-expressed sequence 264 protein isoform 1 precursor                                 | NP_001230654.1    | 2          | 2                 | 2          | 4      | 0.96                                                     | 1.1                                                      | 19.42                                                                                  | 11.44                                                                                  | 26.8                                                                                          | 18                                                                                            | 2                                                                              | 2                                                                              | 15492   | 51368          | testis expressed sequence 264                                                    | Molecular function unknown                   | Extracellular         | Secreted polypeptide                                       | Biological process unknown                                                                    | SP             | Yes                      |
| ATP11C      | 286410  | phospholipid-transporting ATPase 11C isoform a                                            | NP_775965.2       | 2          | 1                 | 1          | 2      | 0.96                                                     | 1.1                                                      | 1.1                                                                                    |                                                                                        |                                                                                               |                                                                                               | 1                                                                              | 1                                                                              | 9814    | 286410         | ATPase, Class VI, type 11C                                                       | ATPase activity                              | -                     | ATPase                                                     | Transport                                                                                     | TM             | Yes                      |
| TERF2IP     | 54386   | telomeric repeat-binding factor 2-interacting protein 1                                   | NP_061848.2       | 1          | 1                 | 1          | 2      | 0.96                                                     | 1.1                                                      | 1.1                                                                                    |                                                                                        |                                                                                               |                                                                                               | 1                                                                              | 1                                                                              | 5452    | 54386          | telomeric repeat binding factor 2-interacting protein                            | DNA binding                                  | Nucleus               | DNA binding protein;Cell cycle control protein             | Cell communication;Signal transduction;Chromosome organization and biogenesis (sensu Eukarya) | CC;NLS;BRCT    | Yes                      |
| UBTF        | 7343    | nucleolar transcription factor 1 isoform a                                                | NP_055048.1       | 2          | 5                 | 5          | 11     | 0.96                                                     | 1.1                                                      | 4.68                                                                                   | 13.85                                                                                  | 12.8                                                                                          | 45                                                                                            | 8                                                                              | 8                                                                              | 2814    | 7343           | upstream binding transcription factor, RNAPolymerase I                           | Transcription factor activity                | Nucleolus             | Transcription factor                                       | Regulation of nucleobase, nucleoside, nucleotide and nucleic acid metabolism                  | HMG;CC         | Yes                      |
| ADPGK       | 83440   | ADP-dependent glucokinase precursor                                                       | NP_112574.3       | 1          | 2                 | 2          | 5      | 0.96                                                     | 1.09                                                     | 3.21                                                                                   | 5.11                                                                                   | 5.3                                                                                           | 9.7                                                                                           | 3                                                                              | 3                                                                              | 12429   | 83440          | ADP-dependent glucokinase                                                        | Phosphorylase activity                       | -                     | Enzyme: Phosphorylase                                      | Metabolism;Energy pathways                                                                    | SP             | No                       |
| PEBP1       | 5037    | phosphatidylethanolamine-binding protein 1 preproprotein                                  | NP_002558.1       | 1          | 6                 | 6          | 31     | 0.96                                                     | 1.09                                                     | 8.3                                                                                    | 4.66                                                                                   | 33.6                                                                                          | 21.3                                                                                          | 17                                                                             | 17                                                                             | 6850    | 5037           | prostatic binding protein                                                        | Protease inhibitor activity                  | Cytoplasm             | Protease inhibitor                                         | Cell communication;Signal transduction                                                        | -              | Yes                      |
| UBA52       | 7311    | ubiquitin-60S ribosomal protein L40 precursor                                             | NP_001029102.1    | 3          | 1                 | 8          | 72     | 0.96                                                     | 1.08                                                     | 1.08                                                                                   |                                                                                        |                                                                                               |                                                                                               | 1                                                                              | 1                                                                              | 8931    | 7311           | ubiquitin A-52 residue ribosomal protein fusionproduct 1                         | Structural constituent of ribosome           | Ribosome              | Ribosomal subunit                                          | Protein metabolism                                                                            | UBQ            | No                       |
| TSN         | 7247    | translin isoform 1                                                                        | NP_004613.1       | 2          | 11                | 11         | 25     | 0.96                                                     | 1.07                                                     | 4.17                                                                                   | 4.31                                                                                   | 15.6                                                                                          | 18                                                                                            | 15                                                                             | 15                                                                             | 8993    | 7247           | translin                                                                         | DNA binding                                  | Nucleus               | DNA binding protein                                        | Regulation of nucleobase, nucleoside, nucleotide and nucleic acid metabolism                  | -              | Yes                      |

Supplementary Table S1. List of quantified proteins in OKF6/TERT1-Smoke cells  
 Raingonalan *et al.*, 2017. Role of protein kinase N2 (PKN2) in cigarette smoke-mediated oncogenic transformation of oral cells

| Gene Symbol  | Gene ID   | Protein Description                                                                     | Protein Accession | # Proteins | # Unique Peptides | # Peptides | # PSMs | OKF6/TERT1-Smoke/<br>OKF6/TERT1-Parental<br>(130/126) R1 | OKF6/TERT1-Smoke/<br>OKF6/TERT1-Parental<br>(128/127) R2 | Ratio Standard Errors [%]:<br>OKF6/TERT1-Smoke/<br>OKF6/TERT1-Parental<br>(130/126) R1 | Ratio Standard Errors [%]:<br>OKF6/TERT1-Smoke/<br>OKF6/TERT1-Parental<br>(128/127) R2 | Ratio Variabilities [%]:<br>F13: OKF6/TERT1-<br>Smoke/<br>OKF6/TERT1-Parental<br>(130/126) R1 | Ratio Variabilities [%]:<br>F13: OKF6/TERT1-<br>Smoke/<br>OKF6/TERT1-Parental<br>(128/127) R2 | Ratio Counts: F13:<br>OKF6/TERT1-Smoke/<br>OKF6/TERT1-Parental<br>(130/126) R1 | Ratio Counts: F13:<br>OKF6/TERT1-Smoke/<br>OKF6/TERT1-Parental<br>(128/127) R2 | HPRD ID | Entrez Gene ID | Gene Name                                                                                                                     | Molecular Function                                      | Primary Localization              | Molecular Class                     | Biological Process                                               | Domains                 | Plasma Proteome Database |
|--------------|-----------|-----------------------------------------------------------------------------------------|-------------------|------------|-------------------|------------|--------|----------------------------------------------------------|----------------------------------------------------------|----------------------------------------------------------------------------------------|----------------------------------------------------------------------------------------|-----------------------------------------------------------------------------------------------|-----------------------------------------------------------------------------------------------|--------------------------------------------------------------------------------|--------------------------------------------------------------------------------|---------|----------------|-------------------------------------------------------------------------------------------------------------------------------|---------------------------------------------------------|-----------------------------------|-------------------------------------|------------------------------------------------------------------|-------------------------|--------------------------|
| XRCC5        | 7520      | X-ray repair cross-complementing protein 5                                              | NP_066964.1       | 1          | 37                | 37         | 170    | 0.96                                                     | 1.07                                                     | 4.37                                                                                   | 4.09                                                                                   | 40.5                                                                                          | 42.5                                                                                          | 86                                                                             | 86                                                                             | 8935    | 7520           | X-ray repair complementing defective repair in Chinese hamster cells 5 (double-strand-break rejoining; Ku autoantigen, 80kDa) | DNA repair protein                                      | Nucleus                           | DNA binding protein                 | Regulation of nucleobase, nucleotide and nucleic acid metabolism | VWA;Ku78                | Yes                      |
| LOC102724985 | 102724985 | pyridoxal-dependent decarboxylase domain-containing protein 1 isoform X1                | XP_006726658.1    | 8          | 8                 | 8          | 15     | 0.96                                                     | 1.07                                                     | 5.5                                                                                    | 8.38                                                                                   | 12.9                                                                                          | 22.3                                                                                          | 6                                                                              | 6                                                                              |         |                |                                                                                                                               |                                                         |                                   |                                     |                                                                  |                         |                          |
| NUDT21       | 11051     | cleavage and polyadenylation specificity factor subunit 5                               | NP_008937.1       | 1          | 7                 | 7          | 14     | 0.96                                                     | 1.07                                                     | 4.84                                                                                   | 6.81                                                                                   | 13.3                                                                                          | 20.8                                                                                          | 8                                                                              | 8                                                                              | 5400    | 11051          | cleavage and polyadenylation specific factor 5.25 kDa                                                                         | RNA binding                                             | Nucleus                           | RNA binding protein                 | Regulation of nucleobase, nucleotide and nucleic acid metabolism | -                       | No                       |
| MIOS         | 54468     | WD repeat-containing protein mio                                                        | NP_061878.3       | 1          | 2                 | 2          | 4      | 0.96                                                     | 1.07                                                     | 10.25                                                                                  | 21.29                                                                                  | 14                                                                                            | 33                                                                                            | 2                                                                              | 2                                                                              | 7898    | 54468          | None                                                                                                                          | Molecular function unknown                              | -                                 | Unclassified                        | Cell communication;Signal transduction                           | WD40                    | Yes                      |
| RCOR1        | 23186     | REST corepressor 1                                                                      | NP_055971.2       | 5          | 2                 | 2          | 3      | 0.96                                                     | 1.05                                                     | 23.85                                                                                  | 6.37                                                                                   | 33.3                                                                                          | 9.5                                                                                           | 2                                                                              | 2                                                                              | 9645    | 23186          | REST corepressor 1                                                                                                            | Transcription regulator activity                        | Nucleus                           | Transcription regulatory protein    | Regulation of nucleobase, nucleotide and nucleic acid metabolism | SANT;CC                 | Yes                      |
| CASP8        | 841       | caspace-8 isoform G precursor                                                           | NP_001073594.1    | 5          | 6                 | 6          | 13     | 0.96                                                     | 1.04                                                     | 11.76                                                                                  | 6.94                                                                                   | 28.2                                                                                          | 17.7                                                                                          | 6                                                                              | 6                                                                              | 3459    | 841            | caspace 8, apoptosis-related cysteine protease                                                                                | Cysteine-type peptidase activity                        | Cytosol;Cytoplasm                 | Cysteine protease                   | Apoptosis                                                        | DED;CAsE                | Yes                      |
| EGFR         | 1956      | epidermal growth factor receptor isoform a precursor                                    | NP_005219.2       | 10         | 32                | 32         | 79     | 0.96                                                     | 1.04                                                     | 3.09                                                                                   | 2.73                                                                                   | 19                                                                                            | 18.2                                                                                          | 40                                                                             | 40                                                                             | 579     | 1956           | epidermal growth factor receptor (erythroblastic leukemia viral (v-erb-b) oncogene homolog, avian)                            | Transmembrane receptor protein tyrosine kinase activity | Plasma membrane;Nucleus;Cytoplasm | Receptor tyrosine kinase            | Cell communication;Signal transduction                           | REC;FU;Tyr_Kinase;TM;SP | Yes                      |
| IMP4         | 92856     | U3 small nuclear ribonucleoprotein protein IMP4                                         | NP_219484.1       | 1          | 2                 | 2          | 4      | 0.96                                                     | 1.04                                                     | 1.2                                                                                    | 26.39                                                                                  | 1.6                                                                                           | 40.5                                                                                          | 2                                                                              | 2                                                                              | 10002   | 92856          | IMP4, U3 small nuclear ribonucleoprotein, homolog (yeast)                                                                     | Ribonucleoprotein                                       | Nucleolus                         | RNA binding protein                 | Regulation of nucleobase, nucleotide and nucleic acid metabolism | CC                      | No                       |
| METTL8       | 79828     | methyltransferase-like protein 8                                                        | NP_079046.2       | 1          | 1                 | 1          | 1      | 0.96                                                     | 1.04                                                     | 1.04                                                                                   |                                                                                        |                                                                                               |                                                                                               | 1                                                                              | 1                                                                              | 7845    | 79828          | None                                                                                                                          | Molecular function unknown                              | -                                 | Unclassified                        | Biological process unknown                                       | -                       | No                       |
| PICALM       | 8301      | phosphatidylinositol-binding clathrin assembly protein isoform 1                        | NP_009097.2       | 9          | 10                | 10         | 28     | 0.96                                                     | 1.04                                                     | 4.93                                                                                   | 4.46                                                                                   | 16.4                                                                                          | 16.1                                                                                          | 12                                                                             | 12                                                                             | 4320    | 8301           | phosphatidylinositol binding clathrin assembly protein                                                                        | Clathrin binding                                        | Plasma membrane                   | Transport/cargo protein             | Regulation of endocytosis                                        | CC                      | Yes                      |
| DHX37        | 57647     | probable ATP-dependent RNA helicase DHX37                                               | NP_116045.2       | 1          | 1                 | 1          | 2      | 0.96                                                     | 1.03                                                     | 1.03                                                                                   |                                                                                        |                                                                                               |                                                                                               | 1                                                                              | 1                                                                              | 10883   | 57647          | DEAH (Asp-Glu-Ala-His) box polypeptide 37                                                                                     | Helicase activity                                       | Nucleolus                         | RNA helicase                        | Regulation of nucleobase, nucleotide and nucleic acid metabolism | DEXDc;HELIC             | Yes                      |
| GUF1         | 60558     | translation factor GUF1, mitochondrial                                                  | NP_068746.2       | 1          | 3                 | 3          | 7      | 0.96                                                     | 1.03                                                     | 5.65                                                                                   | 15.45                                                                                  | 10.8                                                                                          | 32.6                                                                                          | 4                                                                              | 4                                                                              | 7821    | 60558          | None                                                                                                                          | Molecular function unknown                              | -                                 | Unclassified                        | Biological process unknown                                       | GTP_EFTU;GTP_EFTU_D2    | No                       |
| MTOR         | 2475      | serine/threonine-protein kinase mTOR                                                    | NP_004949.1       | 2          | 12                | 13         | 22     | 0.96                                                     | 1.03                                                     | 7.13                                                                                   | 2.86                                                                                   | 20.7                                                                                          | 8.8                                                                                           | 9                                                                              | 9                                                                              | 3134    | 2475           | FK506 binding protein 12-epimycin associated protein 1                                                                        | Kinase activity                                         | Nucleus                           | Cell cycle control protein          | Cell communication;Signal transduction                           | PI3Kc                   | Yes                      |
| PSMD3        | 5709      | 26S proteasome non-ATPase regulatory subunit 3                                          | NP_002800.2       | 1          | 24                | 24         | 75     | 0.96                                                     | 1.03                                                     | 3.91                                                                                   | 3                                                                                      | 24.5                                                                                          | 20                                                                                            | 41                                                                             | 41                                                                             | 10170   | 5709           | proteasome (prosome, multicatalytic 26S subunit, non-ATPase, 3)                                                               | Ubiquitin-specific protease activity                    | Cytoplasm                         | Ubiquitin proteasome system protein | Protein metabolism                                               | CC;PINT                 | Yes                      |
| RPL7         | 6129      | 60S ribosomal protein L7                                                                | NP_000962.2       | 1          | 19                | 20         | 109    | 0.96                                                     | 1.03                                                     | 2.4                                                                                    | 2.74                                                                                   | 17.6                                                                                          | 21.8                                                                                          | 58                                                                             | 58                                                                             | 5004    | 6129           | ribosomal protein L7                                                                                                          | Structural constituent of ribosome                      | Ribosome                          | Ribosomal subunit                   | Protein metabolism                                               | -                       | Yes                      |
| PPP2CA       | 5515      | serine/threonine-protein phosphatase 2A catalytic subunit alpha isoform                 | NP_002706.1       | 1          | 2                 | 13         | 46     | 0.96                                                     | 1.01                                                     | 24.08                                                                                  | 4.22                                                                                   | 41.6                                                                                          | 7.4                                                                                           | 3                                                                              | 3                                                                              | 8912    | 5515           | protein phosphatase 2 (formerly 2A), catalytic subunit, alpha isoform                                                         | Protein serine/threonine phosphatase activity           | Cytoplasm                         | Serine/threonine phosphatase        | Cell communication;Signal transduction                           | PP2A                    | Yes                      |
| ATG7         | 10533     | ubiquitin-like modifier-activating enzyme ATG7 isoform a                                | NP_006386.1       | 3          | 10                | 10         | 21     | 0.96                                                     | 1.01                                                     | 5.44                                                                                   | 3.63                                                                                   | 17.4                                                                                          | 12.2                                                                                          | 11                                                                             | 11                                                                             | 12293   | 10533          | APG7 autophagy 7-like (S cerevisiae)                                                                                          | Molecular function unknown                              | Cytoplasm                         | Unclassified                        | Cell growth and/or maintenance                                   | SP                      | No                       |
| DHX29        | 54505     | ATP-dependent RNA helicase DHX29                                                        | NP_061903.2       | 1          | 16                | 17         | 43     | 0.96                                                     | 1.01                                                     | 4.03                                                                                   | 5.67                                                                                   | 18.3                                                                                          | 27.4                                                                                          | 22                                                                             | 22                                                                             | 10882   | 54505          | DEAH (Asp-Glu-Ala-His) box polypeptide 29                                                                                     | Helicase activity                                       | -                                 | RNA helicase                        | Regulation of nucleobase, nucleotide and nucleic acid metabolism | CC;DEXDc;HELIC;SP       | Yes                      |
| AHNAK        | 79026     | neuroblast differentiation-associated protein AHNAK isoform 1                           | NP_001611.1       | 3          | 310               | 310        | 1517   | 0.96                                                     | 1.01                                                     | 1.46                                                                                   | 2.23                                                                                   | 40.9                                                                                          | 70.6                                                                                          | 796                                                                            | 796                                                                            | 14684   | 79026          | AHNAK nucleoprotein (desmoyokin)                                                                                              | Protein binding                                         | Nucleus                           | Unclassified                        | Muscle contraction                                               | PDZ;NLS                 | Yes                      |
| TMEM131      | 23505     | transmembrane protein 131                                                               | NP_056163.1       | 1          | 1                 | 1          | 2      | 0.96                                                     | 1.01                                                     | 1.01                                                                                   |                                                                                        |                                                                                               |                                                                                               | 1                                                                              | 1                                                                              | 19388   | 23505          | transmembrane protein 131                                                                                                     | Molecular function unknown                              | -                                 | Unclassified                        | Biological process unknown                                       | TM                      | Yes                      |
| DPYSL2       | 1808      | dihydropyrimidase-related protein 2 isoform 1                                           | NP_001184222.1    | 7          | 18                | 21         | 93     | 0.96                                                     | 1.01                                                     | 3.55                                                                                   | 5.96                                                                                   | 21.3                                                                                          | 38.6                                                                                          | 38                                                                             | 38                                                                             | 3914    | 1808           | dihydropyrimidase-like 2                                                                                                      | Cytoskeletal protein binding                            | Cytoplasm                         | Cytoskeletal associated protein     | Cell communication;Signal transduction                           | -                       | Yes                      |
| DPP9         | 91039     | dipeptidyl peptidase 9                                                                  | NP_631898.3       | 1          | 17                | 17         | 36     | 0.96                                                     | 1                                                        | 3.74                                                                                   | 4.06                                                                                   | 16.6                                                                                          | 18.8                                                                                          | 21                                                                             | 21                                                                             | 7001    | 91039          | dipeptidyl peptidase 9                                                                                                        | Aminopeptidase activity                                 | Cytoplasm                         | Aminopeptidase                      | Metabolism;Energy pathways                                       | -                       | No                       |
| PRKRA        | 8575      | interferon-inducible double-stranded RNA-dependent protein kinase activator A isoform 1 | NP_003681.1       | 3          | 2                 | 2          | 2      | 0.96                                                     | 1                                                        | 1.42                                                                                   | 21.1                                                                                   | 1.9                                                                                           | 30.5                                                                                          | 2                                                                              | 2                                                                              | 4573    | 8575           | protein kinase, interferon-inducible, double-stranded RNA dependent activator                                                 | RNA binding                                             | Cytoplasm                         | RNA binding protein                 | Regulation of nucleobase, nucleotide and nucleic acid metabolism | DSRM                    | No                       |

Supplementary Table S1. List of quantified proteins in OKF6/TERT1-Smoke cells  
 Raingopaln *et al.*, 2017. Role of protein kinase N2 (PKN2) in cigarette smoke-mediated oncogenic transformation of oral cells

| Gene Symbol | Gene ID | Protein Description                                                      | Protein Accession | # Proteins | # Unique Peptides | # Peptides | # PSMs | OKF6/TERT1-Smoke/<br>OKF6/TERT1-Parental<br>(130/126) R1 | OKF6/TERT1-Smoke/<br>OKF6/TERT1-Parental<br>(128/127) R2 | Ratio Standard Errors [%]:<br>OKF6/TERT1-Smoke/<br>OKF6/TERT1-Parental<br>(130/126) R1 | Ratio Standard Errors [%]:<br>OKF6/TERT1-Smoke/<br>OKF6/TERT1-Parental<br>(128/127) R2 | Ratio Variabilities [%]:<br>F13: OKF6/TERT1-<br>Smoke/<br>OKF6/TERT1-Parental<br>(130/126) R1 | Ratio Variabilities [%]:<br>F13: OKF6/TERT1-<br>Smoke/<br>OKF6/TERT1-Parental<br>(128/127) R2 | Ratio Counts: F13:<br>OKF6/TERT1-Smoke/<br>OKF6/TERT1-Parental<br>(130/126) R1 | Ratio Counts: F13:<br>OKF6/TERT1-Smoke/<br>OKF6/TERT1-Parental<br>(128/127) R2 | HPRD ID | Entrez Gene Id | Gene Name                                                                                      | Molecular Function                           | Primary Localization                    | Molecular Class                     | Biological Process                                                           | Domains    | Plasma Proteome Database |
|-------------|---------|--------------------------------------------------------------------------|-------------------|------------|-------------------|------------|--------|----------------------------------------------------------|----------------------------------------------------------|----------------------------------------------------------------------------------------|----------------------------------------------------------------------------------------|-----------------------------------------------------------------------------------------------|-----------------------------------------------------------------------------------------------|--------------------------------------------------------------------------------|--------------------------------------------------------------------------------|---------|----------------|------------------------------------------------------------------------------------------------|----------------------------------------------|-----------------------------------------|-------------------------------------|------------------------------------------------------------------------------|------------|--------------------------|
| SACMIL      | 22908   | phosphatidylinositol phosphate SAC1                                      | NP_054735.3       | 1          | 10                | 10         | 25     | 0.96                                                     | 1                                                        | 5.3                                                                                    | 5.66                                                                                   | 18.6                                                                                          | 20.6                                                                                          | 13                                                                             | 13                                                                             | 7587    | 22908          | SAC1 suppressor of actin mutation 1-like(yeast)                                                | Lipid phosphatase activity                   | Endoplasmic reticulum                   | Lipid phosphatase                   | Cell communication;Signal transduction                                       | TM         | No                       |
| NUDT19      | 390916  | nucleoside diphosphate-linked moiety X motif 19, mitochondrial precursor | NP_001099040.1    | 3          | 4                 | 4          | 9      | 0.96                                                     | 1                                                        | 8.9                                                                                    | 28.27                                                                                  | 14.9                                                                                          | 52.3                                                                                          | 3                                                                              | 3                                                                              | 19584   | 390916         | nudix (nucleoside diphosphate linked moiety X)-type motif 19                                   | Hydrolase activity                           | -                                       | Unclassified                        | Biological processes unknown                                                 | -          | No                       |
| EIF1B       | 10289   | eukaryotic translation initiation factor 1b                              | NP_005866.1       | 2          | 2                 | 2          | 3      | 0.96                                                     | 1                                                        | 35.43                                                                                  | 10.95                                                                                  | 51.2                                                                                          | 15.5                                                                                          | 2                                                                              | 2                                                                              | 17032   | 10289          | None                                                                                           | Translation regulator activity               | Nucleus                                 | Translation regulatory protein      | Protein metabolism                                                           | -          | No                       |
| ALG5        | 29880   | dolichyl-phosphate beta-glucosyltransferase isoform 1                    | NP_037470.1       | 2          | 4                 | 4          | 7      | 0.96                                                     | 0.98                                                     | 23.59                                                                                  | 20.75                                                                                  | 53.8                                                                                          | 47.7                                                                                          | 5                                                                              | 5                                                                              | 5193    | 29880          | asparagine-linked glycosylation 5 homology(yeast, dolichyl-phosphate beta-glucosyltransferase) | Transferase activity                         | Endoplasmic reticulum                   | Enzyme: Glycosyltransferase         | Protein metabolism                                                           | TM         | Yes                      |
| DPP3        | 10072   | dipeptidyl peptidase 3 isoform 1                                         | NP_005691.2       | 2          | 17                | 17         | 50     | 0.96                                                     | 0.97                                                     | 3.65                                                                                   | 4.08                                                                                   | 17.7                                                                                          | 20                                                                                            | 25                                                                             | 25                                                                             | 6012    | 10072          | dipeptidylpeptidase 3                                                                          | Aminopeptidase activity                      | Cytoplasm                               | Aminopeptidase                      | Protein metabolism                                                           | -          | Yes                      |
| AP1M2       | 10053   | AP-1 complex subunit mu-2 isoform 1                                      | NP_001287816.1    | 2          | 2                 | 4          | 6      | 0.96                                                     | 0.96                                                     |                                                                                        |                                                                                        |                                                                                               |                                                                                               | 1                                                                              | 1                                                                              | 6296    | 10053          | adaptor-related protein complex 1, mu 2 subunit                                                | Receptor signaling complex scaffold activity | Cytoplasm                               | Adapter molecule                    | Cell communication;Signal transduction                                       | -          | Yes                      |
| VPS45       | 11311   | vacuolar protein sorting-associated protein 45 isoform 1                 | NP_009190.2       | 4          | 5                 | 5          | 10     | 0.96                                                     | 0.96                                                     | 8.24                                                                                   | 16.42                                                                                  | 17.8                                                                                          | 36.5                                                                                          | 5                                                                              | 5                                                                              | 10301   | 11311          | vacuolar protein sorting 45A (yeast)                                                           | Transporter activity                         | Golgi apparatus                         | Transport/cargo protein             | Transport                                                                    | -          | Yes                      |
| BUD31       | 8896    | protein BUD31 homolog                                                    | NP_003901.2       | 1          | 3                 | 3          | 7      | 0.96                                                     | 0.95                                                     | 4.35                                                                                   | 5.22                                                                                   | 9.4                                                                                           | 11.2                                                                                          | 5                                                                              | 5                                                                              | 10351   | 8896           | None                                                                                           | Transcription regulator activity             | Nucleus                                 | Transcription regulatory protein    | Regulation of nucleobase, nucleoside, nucleotide and nucleic acid metabolism | -          | Yes                      |
| DCTN1       | 1639    | dynactin subunit 1 isoform 3                                             | NP_001128512.1    | 6          | 32                | 32         | 65     | 0.96                                                     | 0.94                                                     | 4.25                                                                                   | 6.05                                                                                   | 25.2                                                                                          | 35.6                                                                                          | 37                                                                             | 37                                                                             | 7206    | 1639           | dynein 1 (p150, glued homolog, Drosophila)                                                     | Structural constituent of cytoskeleton       | Centrosome                              | Cytoskeletal protein                | Transport                                                                    | CC         | Yes                      |
| EML4        | 27436   | ectoderm microtubule-associated protein-like 4 isoform a                 | NP_061936.2       | 2          | 9                 | 9          | 15     | 0.96                                                     | 0.94                                                     | 8.61                                                                                   | 9.7                                                                                    | 25.2                                                                                          | 28                                                                                            | 9                                                                              | 9                                                                              | 6310    | 27436          | ectoderm microtubule associated protein like 4                                                 | Structural molecule activity                 | Cytoplasm                               | Structural protein                  | Cell growth and/or maintenance                                               | CC;WD40;TM | Yes                      |
| AP1G2       | 8906    | AP-1 complex subunit gamma-like 2 isoform 1                              | NP_003908.1       | 3          | 5                 | 5          | 7      | 0.96                                                     | 0.94                                                     | 2.39                                                                                   | 9                                                                                      | 5.1                                                                                           | 19.1                                                                                          | 5                                                                              | 5                                                                              | 4638    | 8906           | adaptor-related protein complex 1, gamma 2 subunit                                             | Transporter activity                         | Cytosol                                 | Transport/cargo protein             | Transport                                                                    | ADAP       | Yes                      |
| RALBP1      | 10928   | ralA-binding protein 1                                                   | NP_006779.1       | 1          | 2                 | 2          | 6      | 0.96                                                     | 0.93                                                     | 0.91                                                                                   | 8.75                                                                                   | 1.5                                                                                           | 14.1                                                                                          | 3                                                                              | 3                                                                              | 9013    | 10928          | ralA binding protein 1                                                                         | GTPase activator activity                    | Plasma membrane                         | GTPase activating protein           | Cell communication;Signal transduction                                       | RHOGAP;CC  | Yes                      |
| IARS        | 3376    | isoleucine-tRNA ligase, cytoplasmic                                      | NP_002152.2       | 1          | 34                | 34         | 107    | 0.96                                                     | 0.93                                                     | 3.45                                                                                   | 4.25                                                                                   | 24.9                                                                                          | 29.9                                                                                          | 55                                                                             | 55                                                                             | 2832    | 3376           | isoleucine-tRNA synthetase                                                                     | Ligase activity                              | Cytoplasm                               | Enzyme: Ligase                      | Protein metabolism                                                           | -          | Yes                      |
| FASN        | 2194    | fatty acid synthase                                                      | NP_004095.4       | 1          | 109               | 110        | 543    | 0.96                                                     | 0.92                                                     | 1.36                                                                                   | 1.69                                                                                   | 22.3                                                                                          | 26.7                                                                                          | 283                                                                            | 283                                                                            | 2567    | 2194           | fatty acid synthase                                                                            | Catalytic activity                           | Cytoplasm                               | Enzyme: Synthase                    | Metabolism;Energy pathways                                                   | -          | Yes                      |
| SLC25A10    | 1468    | mitochondrial dicarboxylate carrier isoform 1                            | NP_001257817.1    | 3          | 3                 | 3          | 4      | 0.96                                                     | 0.92                                                     | 17.23                                                                                  | 2.63                                                                                   | 23.7                                                                                          | 3.4                                                                                           | 2                                                                              | 2                                                                              | 8424    | 1468           | solute carrier family 25 (mitochondrial carrier, dicarboxylate transporter), member 10         | Transporter activity                         | Mitochondrion                           | Transport/cargo protein             | Transport                                                                    | -          | No                       |
| SNX1        | 6642    | sorting nexin-1 isoform a                                                | NP_003090.2       | 3          | 9                 | 12         | 44     | 0.96                                                     | 0.92                                                     | 4.45                                                                                   | 5.54                                                                                   | 17.8                                                                                          | 21.2                                                                                          | 17                                                                             | 17                                                                             | 3171    | 6642           | sorting nexin 1                                                                                | Transporter activity                         | Endosome;Plasma membrane                | Transport/cargo protein             | Cell communication;Signal transduction                                       | PX;CC      | Yes                      |
| NIPBL       | 25836   | nipped-B-like protein isoform A                                          | NP_597677.2       | 2          | 4                 | 4          | 5      | 0.96                                                     | 0.92                                                     | 9                                                                                      | 3.54                                                                                   | 15                                                                                            | 5.6                                                                                           | 3                                                                              | 3                                                                              | 10560   | 25836          | Nipped-B homolog (Drosophila)                                                                  | DNA repair protein                           | Nucleus                                 | -                                   | Regulation of nucleobase, nucleoside, nucleotide and nucleic acid metabolism | CC         | Yes                      |
| POLR2B      | 5431    | DNA-directed RNA polymerase II subunit RPB2 isoform 1                    | NP_000929.1       | 3          | 15                | 15         | 31     | 0.96                                                     | 0.91                                                     | 7.24                                                                                   | 12.14                                                                                  | 27.5                                                                                          | 44.9                                                                                          | 15                                                                             | 15                                                                             | 15943   | 5431           | polymerase (RNA) II (DNA directed) polypeptideB, 140kDa                                        | DNA-directed RNA polymerase activity         | Nucleus                                 | (RNA) polymerase                    | Regulation of nucleobase, nucleoside, nucleotide and nucleic acid metabolism | -          | Yes                      |
| PHC2        | 1912    | polyhormetic-like protein 2 isoform a                                    | NP_932157.1       | 2          | 1                 | 1          | 1      | 0.96                                                     | 0.89                                                     |                                                                                        |                                                                                        |                                                                                               |                                                                                               | 1                                                                              | 1                                                                              | 10340   | 1912           | polyhormetic-like 2 (Drosophila)                                                               | Ubiquitin-specific protease activity         | Nucleus                                 | Ubiquitin proteasome system protein | Protein metabolism                                                           | SAM        | No                       |
| SEC24B      | 10427   | protein transport protein Sec24B isoform c                               | NP_001287742.1    | 3          | 9                 | 10         | 29     | 0.96                                                     | 0.89                                                     | 4.1                                                                                    | 11.21                                                                                  | 13.2                                                                                          | 34.1                                                                                          | 11                                                                             | 11                                                                             | 6216    | 10427          | SEC24 related gene family, member B (S.cerevisiae)                                             | Transporter activity                         | Cytoplasm                               | Transport/cargo protein             | Transport                                                                    | GEL        | Yes                      |
| HPS6        | 79803   | Hermansky-Pudlak syndrome 6 protein                                      | NP_079023.2       | 1          | 3                 | 3          | 6      | 0.96                                                     | 0.85                                                     | 13.16                                                                                  | 34                                                                                     | 22.1                                                                                          | 53.5                                                                                          | 3                                                                              | 3                                                                              | 8471    | 79803          | Hermansky-Pudlak syndrome 6                                                                    | Molecular function unknown                   | -                                       | Unclassified                        | Biological processes unknown                                                 | SP         | Yes                      |
| RRBP1       | 6238    | ribosome-binding protein 1                                               | NP_004578.2       | 12         | 58                | 59         | 236    | 0.96                                                     | 0.85                                                     | 2                                                                                      | 2.74                                                                                   | 21.4                                                                                          | 26                                                                                            | 121                                                                            | 120                                                                            | 11796   | 6238           | ribosome binding protein 1 homolog 180kDa (dog)                                                | Transmembrane receptor activity              | Endoplasmic reticulum;Nucleus;Cytoplasm | Integral membrane protein           | Transport                                                                    | TM;CC      | Yes                      |
| SEC22B      | 9554    | vesicle-trafficking protein SEC22b precursor                             | NP_004883.3       | 1          | 7                 | 7          | 32     | 0.96                                                     | 0.84                                                     | 5.53                                                                                   | 4.98                                                                                   | 22.8                                                                                          | 17.9                                                                                          | 18                                                                             | 18                                                                             | 4939    | 9554           | SEC22 vesicle trafficking protein like 1 (S.cerevisiae)                                        | Transporter activity                         | Endoplasmic reticulum                   | Integral membrane protein           | Cell communication;Signal transduction                                       | TM         | Yes                      |
| STX4        | 6810    | syntaxin-4 isoform 3                                                     | NP_004595.2       | 3          | 4                 | 4          | 4      | 0.96                                                     | 0.83                                                     | 2.4                                                                                    | 21.65                                                                                  | 4                                                                                             | 31.8                                                                                          | 3                                                                              | 3                                                                              | 1722    | 6810           | syntaxin 4A (placental)                                                                        | Auxiliary transport protein activity         | Plasma membrane                         | Membrane transport protein          | Cell communication;Signal transduction                                       | TM;CC;SynN | Yes                      |
| AARS        | 16      | alanine-tRNA ligase, cytoplasmic                                         | NP_001596.2       | 1          | 33                | 33         | 116    | 0.96                                                     | 0.83                                                     | 3.2                                                                                    | 4.8                                                                                    | 24.4                                                                                          | 31.8                                                                                          | 61                                                                             | 61                                                                             | 3042    | 16             | alanyl-tRNA synthetase                                                                         | Ligase activity                              | Cytoplasm                               | Enzyme: Ligase                      | Protein metabolism;Transation                                                | CC         | Yes                      |

Supplementary Table S1. List of quantified proteins in OKF6/TERT1-Smoke cells

| Gene Symbol | Gene ID | Protein Description                                                         | Protein Accession | # Proteins | # Unique Peptides | # Peptides | # PSMs | OKF6/TERT1-Smoke/<br>OKF6/TERT1-Parental<br>(130/126) R1 | OKF6/TERT1-Smoke/<br>OKF6/TERT1-Parental<br>(128/127) R2 | Ratio Standard Errors [%]:<br>OKF6/TERT1-Smoke/<br>OKF6/TERT1-Parental<br>(130/126) R1 | Ratio Standard Errors [%]:<br>OKF6/TERT1-Smoke/<br>OKF6/TERT1-Parental<br>(128/127) R2 | Ratio Variabilities [%]:<br>F13: OKF6/TERT1-<br>Smoke/<br>OKF6/TERT1-Parental<br>(130/126) R1 | Ratio Variabilities [%]:<br>F13: OKF6/TERT1-<br>Smoke/<br>OKF6/TERT1-Parental<br>(128/127) R2 | Ratio Counts: F13:<br>OKF6/TERT1-Smoke/<br>OKF6/TERT1-Parental<br>(130/126) R1 | Ratio Counts: F13:<br>OKF6/TERT1-Smoke/<br>OKF6/TERT1-Parental<br>(128/127) R2 | HPRD ID | Entrez Gene ID | Gene Name                                                          | Molecular Function                            | Primary Localization | Molecular Class                     | Biological Process                                                           | Domains      | Plasma Proteome Database |
|-------------|---------|-----------------------------------------------------------------------------|-------------------|------------|-------------------|------------|--------|----------------------------------------------------------|----------------------------------------------------------|----------------------------------------------------------------------------------------|----------------------------------------------------------------------------------------|-----------------------------------------------------------------------------------------------|-----------------------------------------------------------------------------------------------|--------------------------------------------------------------------------------|--------------------------------------------------------------------------------|---------|----------------|--------------------------------------------------------------------|-----------------------------------------------|----------------------|-------------------------------------|------------------------------------------------------------------------------|--------------|--------------------------|
| TEAD2       | 8463    | transcriptional enhancer factor TEF-4 isoform 2                             | NP_001243589.1    | 7          | 1                 | 1          | 1      | 0.96                                                     | 0.82                                                     |                                                                                        |                                                                                        |                                                                                               |                                                                                               | 1                                                                              | 1                                                                              | 3432    | 8463           | TEA domain family member 2                                         | Transcription factor activity                 | Nucleus              | Transcription factor                | Regulation of nucleobase, nucleoside, nucleotide and nucleic acid metabolism | TEA          | No                       |
| EC1I        | 1632    | enoyl-CoA delta isomerase 1, mitochondrial isoform 1 precursor              | NP_001910.2       | 2          | 6                 | 6          | 18     | 0.96                                                     | 0.79                                                     | 15.33                                                                                  | 6.18                                                                                   | 49.1                                                                                          | 15.6                                                                                          | 10                                                                             | 10                                                                             |         |                |                                                                    |                                               |                      |                                     |                                                                              |              |                          |
| UPF3B       | 65109   | regulator of nonsense transcripts 3B isoform 1                              | NP_542199.1       | 2          | 2                 | 2          | 2      | 0.96                                                     | 0.79                                                     |                                                                                        |                                                                                        |                                                                                               |                                                                                               | 1                                                                              | 1                                                                              | 2247    | 65109          | UPF3 regulator of nonsense transcripts homologB (yeast)            | RNA binding                                   | Nucleus              | RNA binding protein                 | Regulation of nucleobase, nucleoside, nucleotide and nucleic acid metabolism | CC;NES;NLS   | No                       |
| SMC3        | 9126    | structural maintenance of chromosomes protein 3                             | NP_005436.1       | 1          | 22                | 22         | 43     | 0.96                                                     | 0.79                                                     | 4.56                                                                                   | 4.99                                                                                   | 22.9                                                                                          | 20.8                                                                                          | 27                                                                             | 27                                                                             | 5829    | 9126           | chondroitin sulfate proteoglycan 6 (bamacan)                       | Molecular function unknown                    | Nucleus              | Unclassified                        | Biological_process unknown                                                   | CC           | Yes                      |
| FAM210A     | 125228  | protein FAM210A                                                             | NP_689565.2       | 1          | 2                 | 2          | 3      | 0.96                                                     | 0.78                                                     |                                                                                        |                                                                                        |                                                                                               |                                                                                               | 2                                                                              | 2                                                                              |         |                |                                                                    |                                               |                      |                                     |                                                                              |              |                          |
| DDB2        | 1643    | DNA damage-binding protein 2                                                | NP_000098.1       | 2          | 5                 | 5          | 10     | 0.96                                                     | 0.76                                                     | 3.14                                                                                   | 2.55                                                                                   | 7.4                                                                                           | 4.7                                                                                           | 6                                                                              | 6                                                                              | 2886    | 1643           | damage-specific DNA binding protein 2, 48kDa                       | DNA binding                                   | Nucleus/Cytoplasm    | DNA binding protein                 | Regulation of nucleobase, nucleoside, nucleotide and nucleic acid metabolism | WD40         | Yes                      |
| ATP5L       | 10632   | ATP synthase subunit g, mitochondrial                                       | NP_006467.4       | 1          | 7                 | 7          | 23     | 0.96                                                     | 0.75                                                     | 5.76                                                                                   | 5.54                                                                                   | 20.9                                                                                          | 15.6                                                                                          | 14                                                                             | 14                                                                             | 9815    | 10632          | ATP synthase, H+-transporting, mitochondrial F1complex, subunit g  | ATPase activity                               | Mitochondrion        | ATPase                              | Metabolism;Energy pathways                                                   | -            | Yes                      |
| KIAA1217    | 56243   | sickle tail protein homolog isoform 1                                       | NP_062536.2       | 6          | 7                 | 7          | 12     | 0.96                                                     | 0.75                                                     | 3.85                                                                                   | 10.26                                                                                  | 9.8                                                                                           | 20.7                                                                                          | 7                                                                              | 7                                                                              | 11132   | 56243          | KIAA1217                                                           | Molecular function unknown                    | -                    | Unclassified                        | Biological_process unknown                                                   | CC           | No                       |
| SMAD2       | 4087    | mothers against decapentaplegic homolog 2 isoform 1                         | NP_005892.1       | 2          | 3                 | 5          | 13     | 0.96                                                     | 0.74                                                     | 12.96                                                                                  | 5.05                                                                                   | 25.2                                                                                          | 7.5                                                                                           | 4                                                                              | 4                                                                              | 3221    | 4087           | SMAD, mothers against DPP homolog 2(Drosophila)                    | Transcription regulator activity              | Cytoplasm;Nucleus    | DNA binding protein                 | Signal transduction;Regulation of gene expression, epigenetic                | MH1;MH2      | Yes                      |
| POLR3A      | 11128   | DNA-directed RNA polymerase III subunit RPC1                                | NP_008986.2       | 1          | 1                 | 1          | 2      | 0.96                                                     | 0.74                                                     |                                                                                        |                                                                                        |                                                                                               |                                                                                               | 1                                                                              | 1                                                                              | 17879   | 11128          | polymerase (RNA) III (DNA directed) polypeptide A, 155kDa          | DNA-directed RNA polymerase activity          | -                    | RNA polymerase                      | Regulation of nucleobase, nucleoside, nucleotide and nucleic acid metabolism | -            | Yes                      |
| STAT1       | 6772    | signal transducer and activator of transcription 1-alpha/beta isoform alpha | NP_009330.1       | 1          | 3                 | 36         | 118    | 0.96                                                     | 0.69                                                     | 1.3                                                                                    | 53.57                                                                                  | 3.5                                                                                           | 142.5                                                                                         | 8                                                                              | 8                                                                              | 2777    | 6772           | signal transducer and activator of transcription 1, 91kDa          | Transcription factor activity                 | Cytoplasm            | Transcription factor                | Regulation of nucleobase, nucleoside, nucleotide and nucleic acid metabolism | SH2;CC       | Yes                      |
| ARHGDI2A    | 396     | rho GTP-dissociation inhibitor 1 isoform e                                  | NP_001288172.1    | 5          | 6                 | 6          | 22     | 0.96                                                     | 0.69                                                     | 5.78                                                                                   | 5.74                                                                                   | 19.4                                                                                          | 13.8                                                                                          | 12                                                                             | 12                                                                             | 3565    | 396            | Rho GTP dissociation inhibitor (GDI) alpha                         | Molecular function unknown                    | Cytoplasm            | Unclassified                        | Cell growth and/or maintenance                                               | -            | Yes                      |
| CUTA        | 51596   | protein CutA isoform 1                                                      | NP_001014433.1    | 3          | 1                 | 1          | 5      | 0.96                                                     | 0.69                                                     | 7.69                                                                                   | 33.3                                                                                   | 12.8                                                                                          | 41.3                                                                                          | 3                                                                              | 3                                                                              | 12902   | 51596          | chromosome 6 open reading frame 82                                 | Molecular function unknown                    | Plasma membrane      | Unclassified                        | Biological_process unknown                                                   | SP;TM        | Yes                      |
| COQ9        | 57017   | ubiquinone biosynthesis protein COQ9, mitochondrial precursor               | NP_064708.1       | 1          | 2                 | 2          | 2      | 0.96                                                     | 0.57                                                     | 7.85                                                                                   | 80.65                                                                                  | 10.7                                                                                          | 73.1                                                                                          | 2                                                                              | 2                                                                              | 13157   | 57017          | chromosome 16 open reading frame 49                                | Molecular function unknown                    | -                    | Unclassified                        | Biological_process unknown                                                   | -            | No                       |
| USE1        | 55850   | vesicle transport protein USE1                                              | NP_060937.1       | 1          | 1                 | 1          | 2      | 0.96                                                     | 0.54                                                     |                                                                                        |                                                                                        |                                                                                               |                                                                                               | 1                                                                              | 1                                                                              | 11299   | 55850          | None                                                               | Molecular function unknown                    | -                    | Unclassified                        | Biological_process unknown                                                   | CC;TM        | Yes                      |
| RAB22A      | 57403   | ras-related protein Rab-22A                                                 | NP_065724.1       | 1          | 1                 | 3          | 7      | 0.96                                                     | 0.53                                                     |                                                                                        |                                                                                        |                                                                                               |                                                                                               | 1                                                                              | 1                                                                              | 6696    | 57403          | RAB22A, member RAS oncogene family                                 | GTPase activity                               | Endosome             | GTPase                              | Cell communication;Signal transduction                                       | RAB          | Yes                      |
| SLC35C1     | 55343   | GDP-fucose transporter 1 isoform a                                          | NP_060859.4       | 2          | 1                 | 1          | 1      | 0.95                                                     | 1.44                                                     |                                                                                        |                                                                                        |                                                                                               |                                                                                               | 1                                                                              | 1                                                                              | 9324    | 55343          | solute carrier family 35, cytoplasmic member C1                    | Auxiliary transport protein activity          | Golgi apparatus      | Membrane transport protein          | Transport                                                                    | TM           | Yes                      |
| MTERF4      | 130916  | transcription termination factor 4, mitochondrial                           | NP_872307.2       | 1          | 1                 | 1          | 1      | 0.95                                                     | 1.3                                                      |                                                                                        |                                                                                        |                                                                                               |                                                                                               | 1                                                                              | 1                                                                              |         |                |                                                                    |                                               |                      |                                     |                                                                              |              |                          |
| NELFA       | 7469    | negative elongation factor A                                                | NP_005654.3       | 1          | 5                 | 5          | 8      | 0.95                                                     | 1.3                                                      |                                                                                        | 7.9                                                                                    | 8.21                                                                                          | 16.9                                                                                          | 5                                                                              | 5                                                                              |         |                |                                                                    |                                               |                      |                                     |                                                                              |              |                          |
| PSMC5       | 5705    | 26S protease regulatory subunit 8 isoform 1                                 | NP_002796.4       | 2          | 14                | 15         | 43     | 0.95                                                     | 1.25                                                     | 6.24                                                                                   | 6.4                                                                                    | 28.2                                                                                          | 38.9                                                                                          | 22                                                                             | 22                                                                             | 3400    | 5705           | proteasome (prosome, macropain) 26S subunit,ATPase, 5              | Ubiquitin-specific protease activity          | Cytoplasm            | Ubiquitin proteasome system protein | Protein metabolism                                                           | AAA;CC       | Yes                      |
| RPL31       | 6160    | 60S ribosomal protein L31 isoform 1                                         | NP_000984.1       | 3          | 10                | 10         | 38     | 0.95                                                     | 1.23                                                     | 8.16                                                                                   | 5.13                                                                                   | 36.7                                                                                          | 29.5                                                                                          | 21                                                                             | 21                                                                             | 17994   | 6160           | ribosomal protein L31                                              | Structural constituent of ribosome            | Ribosome             | Ribosomal subunit                   | Protein metabolism                                                           | -            | Yes                      |
| PPP1CB      | 5500    | serine/threonine-protein phosphatase PP1-beta catalytic subunit isoform 1   | NP_002700.1       | 1          | 4                 | 15         | 54     | 0.95                                                     | 1.23                                                     | 13.62                                                                                  | 16.15                                                                                  | 35.3                                                                                          | 56.3                                                                                          | 7                                                                              | 7                                                                              | 11792   | 5500           | protein phosphatase 1, catalytic subunit, beta isoform             | Protein serine/threonine phosphatase activity | Nucleolus            | Serine/threonine phosphatase        | Cell growth and/or maintenance                                               | PP2A         | Yes                      |
| CHCHD4      | 131474  | mitochondrial intermembrane space import and assembly protein 40 isoform 2  | NP_653237.1       | 2          | 1                 | 1          | 2      | 0.95                                                     | 1.22                                                     |                                                                                        |                                                                                        |                                                                                               |                                                                                               | 1                                                                              | 1                                                                              | 13045   | 131474         | coiled-coil-helical-coiled-coil-helix domain-containing 4          | Molecular function unknown                    | -                    | Unclassified                        | Biological_process unknown                                                   | CHCH         | No                       |
| NPEPPS      | 9520    | puromycin-sensitive aminopeptidase                                          | NP_006301.3       | 2          | 34                | 34         | 108    | 0.95                                                     | 1.22                                                     | 4                                                                                      | 2.79                                                                                   | 29.9                                                                                          | 26.6                                                                                          | 59                                                                             | 59                                                                             | 7366    | 9520           | aminopeptidase puromycin sensitive                                 | Aminopeptidase activity                       | Cytoplasm            | Aminopeptidase                      | Protein metabolism                                                           | -            | Yes                      |
| NOMO2       | 283820  | nodal modulator 2 isoform 1 precursor                                       | NP_001004060.1    | 5          | 2                 | 29         | 97     | 0.95                                                     | 1.21                                                     | 6.68                                                                                   | 6.59                                                                                   | 12.8                                                                                          | 16                                                                                            | 4                                                                              | 4                                                                              | 12375   | 283820         | NODAL modulator 2                                                  | Molecular function unknown                    | -                    | Unclassified                        | Biological_process unknown                                                   | SP;CC        | Yes                      |
| CLUH        | 23277   | clustered mitochondria protein homolog                                      | NP_056044.3       | 3          | 19                | 19         | 35     | 0.95                                                     | 1.17                                                     | 5.5                                                                                    | 3.82                                                                                   | 24.9                                                                                          | 21.1                                                                                          | 22                                                                             | 22                                                                             |         |                |                                                                    |                                               |                      |                                     |                                                                              |              |                          |
| ARHGEP18    | 23370   | rho guanine nucleotide exchange factor 18 isoform b                         | NP_001124427.1    | 2          | 8                 | 9          | 16     | 0.95                                                     | 1.15                                                     | 1.96                                                                                   | 13.75                                                                                  | 5.2                                                                                           | 47                                                                                            | 8                                                                              | 8                                                                              | 12479   | 23370          | rhoGAP guanine nucleotide exchange factor(GEF) 18                  | Guanyl-nucleotide exchange factor activity    | -                    | Guanine nucleotide exchange factor  | Cell communication;Signal transduction                                       | RHOGEF;PH;CC | No                       |
| TXLNG       | 55787   | gamma-taxilin isoform 1                                                     | NP_060830.2       | 2          | 4                 | 4          | 8      | 0.95                                                     | 1.14                                                     | 6.36                                                                                   | 7.41                                                                                   | 10.5                                                                                          | 14.7                                                                                          | 3                                                                              | 3                                                                              |         |                |                                                                    |                                               |                      |                                     |                                                                              |              |                          |
| GNA11       | 2767    | guanine nucleotide-binding protein subunit alpha-11                         | NP_002058.2       | 2          | 8                 | 11         | 22     | 0.95                                                     | 1.14                                                     | 7.01                                                                                   | 2.54                                                                                   | 18.9                                                                                          | 8.2                                                                                           | 8                                                                              | 8                                                                              | 759     | 2767           | guanine nucleotide binding protein (G-protein),alpha 11 (Gq class) | GTPase activity                               | Plasma membrane      | G protein                           | Cell communication;Signal transduction                                       | CC;GALP      | Yes                      |

Supplementary Table S1. List of quantified proteins in OKF6/TERT1-Smoke cells  
 Raigopalani *et al.*, 2017. Role of protein kinase N2 (PKN2) in cigarette smoke-mediated oncogenic transformation of oral cells

| Gene Symbol | Gene ID | Protein Description                                                                 | Protein Accession | # Proteins | # Unique Peptides | # Peptides | # PSMs | OKF6/TERT1-Smoke/OKF6/TERT1-Parental (130/126) R1 | OKF6/TERT1-Smoke/OKF6/TERT1-Parental (128/127) R2 | Ratio Standard Errors [%]: OKF6/TERT1-Smoke/OKF6/TERT1-Parental (130/126) R1 | Ratio Standard Errors [%]: OKF6/TERT1-Smoke/OKF6/TERT1-Parental (128/127) R2 | Ratio Variabilities [%]: F13: OKF6/TERT1-Smoke/OKF6/TERT1-Parental (130/126) R1 | Ratio Variabilities [%]: F13: OKF6/TERT1-Smoke/OKF6/TERT1-Parental (128/127) R2 | Ratio Counts: F13: OKF6/TERT1-Smoke/OKF6/TERT1-Parental (130/126) R1 | Ratio Counts: F13: OKF6/TERT1-Smoke/OKF6/TERT1-Parental (128/127) R2 | HPRD ID | Entrez Gene ID | Gene Name                                                   | Molecular Function                         | Primary Localization              | Molecular Class                     | Biological Process                                                                                                  | Domains         | Plasma Proteome Database |
|-------------|---------|-------------------------------------------------------------------------------------|-------------------|------------|-------------------|------------|--------|---------------------------------------------------|---------------------------------------------------|------------------------------------------------------------------------------|------------------------------------------------------------------------------|---------------------------------------------------------------------------------|---------------------------------------------------------------------------------|----------------------------------------------------------------------|----------------------------------------------------------------------|---------|----------------|-------------------------------------------------------------|--------------------------------------------|-----------------------------------|-------------------------------------|---------------------------------------------------------------------------------------------------------------------|-----------------|--------------------------|
| TMED4       | 222068  | transmembrane emp24 domain-containing protein 4 isoform 1 precursor                 | NP_872353.2       | 5          | 5                 | 7          | 26     | 0.95                                              | 1.13                                              | 10.64                                                                        | 8.29                                                                         | 20.3                                                                            | 18.8                                                                            | 4                                                                    | 4                                                                    | 13666   | 222068         | transmembrane emp24 protein transport domain-containing 4   | Molecular function unknown                 | -                                 | Integral membrane protein           | Biological process unknown                                                                                          | SP;CC;TM        | No                       |
| GNPDA1      | 10007   | glucosamine-6-phosphate isomerase 1                                                 | NP_005462.1       | 1          | 6                 | 9          | 24     | 0.95                                              | 1.11                                              | 10.5                                                                         | 4.03                                                                         | 28.8                                                                            | 12.7                                                                            | 8                                                                    | 8                                                                    | 9048    | 10007          | glucosamine-6-phosphate deaminase 1                         | Deaminase activity                         | -                                 | Enzyme: Deaminase                   | Metabolism;Energy pathways                                                                                          | -               | Yes                      |
| RPL12       | 6136    | 60S ribosomal protein L12                                                           | NP_000967.1       | 1          | 9                 | 9          | 40     | 0.95                                              | 1.1                                               | 5.58                                                                         | 4.57                                                                         | 24.1                                                                            | 22.7                                                                            | 20                                                                   | 20                                                                   | 1603    | 6136           | ribosomal protein L12                                       | Structural constituent of ribosome         | Nucleus                           | Ribosomal subunit                   | Protein metabolism                                                                                                  | -               | Yes                      |
| ARHGEF5     | 7984    | rho guanine nucleotide exchange factor 5                                            | NP_005426.2       | 2          | 4                 | 5          | 10     | 0.95                                              | 1.1                                               | 7.74                                                                         | 26.68                                                                        | 16.6                                                                            | 73                                                                              | 5                                                                    | 5                                                                    | 2932    | 7984           | Rho guanine nucleotide exchange factor (GEF)5               | Guanyl-nucleotide exchange factor activity | -                                 | Guanine nucleotide exchange factor  | Cell communication;Signal transduction                                                                              | RHOGEF;PH.S3    | Yes                      |
| UBE2D3      | 7323    | ubiquitin-conjugating enzyme E2 D3 isoform 3                                        | NP_871622.1       | 9          | 2                 | 2          | 10     | 0.95                                              | 1.1                                               | 4.47                                                                         | 4.05                                                                         | 9.5                                                                             | 10                                                                              | 5                                                                    | 5                                                                    | 4269    | 7323           | ubiquitin-conjugating enzyme E2 D3 (UBC4/Shomolog yeast)    | Ubiquitin-specific protease activity       | Nucleus                           | Ubiquitin proteasome system protein | Protein metabolism                                                                                                  | UBC             | Yes                      |
| PDHB        | 5162    | pyruvate dehydrogenase E1 component subunit beta, mitochondrial isoform 1 precursor | NP_000916.2       | 2          | 10                | 10         | 26     | 0.95                                              | 1.1                                               | 5.28                                                                         | 13.3                                                                         | 18.2                                                                            | 56.8                                                                            | 13                                                                   | 13                                                                   | 1530    | 5162           | pyruvate dehydrogenase (liponamide) beta                    | Carboxy-lyase activity                     | Mitochondrion                     | Enzyme: Decarboxylase               | Metabolism;Energy pathways                                                                                          | -               | Yes                      |
| PAK1IP1     | 55003   | p21-activated protein kinase-interacting protein 1                                  | NP_060376.2       | 1          | 3                 | 3          | 10     | 0.95                                              | 1.1                                               | 2.56                                                                         | 3.65                                                                         | 5.5                                                                             | 9                                                                               | 5                                                                    | 5                                                                    | 7424    | 55003          | PAK1 interacting protein 1                                  | Cytoskeletal protein binding               | Cytoplasm                         | Cytoskeletal associated protein     | Cell communication;Signal transduction                                                                              | WD40            | No                       |
| NUP37       | 79023   | nucleoporin Nup37                                                                   | NP_076962.2       | 1          | 3                 | 3          | 8      | 0.95                                              | 1.1                                               | 13.26                                                                        | 7.89                                                                         | 25.7                                                                            | 17.4                                                                            | 4                                                                    | 4                                                                    | 14853   | 79023          | nucleoporin N37Da                                           | Transporter activity                       | Nucleus                           | Transport/cargo protein             | Transport                                                                                                           | WD40            | Yes                      |
| CS          | 1431    | citrate synthase, mitochondrial precursor                                           | NP_004068.2       | 1          | 14                | 14         | 69     | 0.95                                              | 1.08                                              | 5.17                                                                         | 3.57                                                                         | 28.4                                                                            | 22.1                                                                            | 32                                                                   | 32                                                                   | 349     | 1431           | citrate synthase                                            | Acyltransferase activity                   | Mitochondrial matrix              | Enzyme: Acyltransferase             | Metabolism;Energy pathways                                                                                          | SP              | Yes                      |
| BZW2        | 28969   | basic leucine zipper and W2 domain-containing protein 2                             | NP_001153239.1    | 1          | 4                 | 7          | 14     | 0.95                                              | 1.08                                              | 8.92                                                                         | 13.21                                                                        | 17.1                                                                            | 29.2                                                                            | 4                                                                    | 4                                                                    | 16571   | 28969          | basic leucine zipper and W2 domain 2                        | Transcription regulator activity           | Nucleolus                         | Transcription regulatory protein    | Protein metabolism                                                                                                  | -               | No                       |
| EIF3K       | 27335   | eukaryotic translation initiation factor 3 subunit K isoform 1                      | NP_037366.1       | 2          | 7                 | 7          | 18     | 0.95                                              | 1.07                                              | 2.36                                                                         | 2.44                                                                         | 7.4                                                                             | 8.7                                                                             | 11                                                                   | 11                                                                   | 11740   | 27335          | eukaryotic translation initiation factor 3 subunit 12       | Translation regulator activity             | Cytoplasm                         | Translation regulatory protein      | Protein metabolism                                                                                                  | -               | Yes                      |
| EYA3        | 2140    | eyes absent homolog 3 isoform a                                                     | NP_001981.2       | 4          | 1                 | 1          | 2      | 0.95                                              | 1.07                                              |                                                                              |                                                                              |                                                                                 |                                                                                 | 1                                                                    | 1                                                                    | 9042    | 2140           | eyes absent homolog 3 (Drosophila)                          | Protein tyrosine phosphatase activity      | Cytoplasm                         | Tyrosine phosphatase                | Cell communication;Signal transduction                                                                              | -               | Yes                      |
| ZKSCAN1     | 7586    | zinc finger protein with KRAB and SCAN-domains 1 isoform a                          | NP_003430.1       | 3          | 1                 | 1          | 2      | 0.95                                              | 1.06                                              |                                                                              |                                                                              |                                                                                 |                                                                                 | 1                                                                    | 1                                                                    | 3161    | 7586           | zinc finger with KRAB and SCAN domains 1                    | Transcription regulator activity           | Nucleus                           | Transcription regulatory protein    | Regulation of nucleobase, nucleoside, nucleotide and nucleic acid metabolism                                        | LER;KRAB;ZNF C2 | Yes                      |
| USP5        | 8078    | ubiquitin carboxyl-terminal hydrolase 5 isoform 1                                   | NP_001092006.1    | 2          | 21                | 21         | 63     | 0.95                                              | 1.04                                              | 2.49                                                                         | 2.57                                                                         | 14.3                                                                            | 16.1                                                                            | 36                                                                   | 36                                                                   | 3265    | 8078           | ubiquitin specific protease 5 (isopeptidase T)              | Ubiquitin-specific protease activity       | Extracellular                     | Ubiquitin proteasome system protein | Protein metabolism                                                                                                  | ZnF;UBP;UBA;UC  | Yes                      |
| LGR6        | 59352   | leucine-rich repeat-containing G-protein coupled receptor 6 isoform 1 precursor     | NP_001017403.1    | 3          | 1                 | 1          | 3      | 0.95                                              | 1.04                                              |                                                                              |                                                                              |                                                                                 |                                                                                 | 1                                                                    | 1                                                                    | 5974    | 59352          | leucine-rich repeat-containing G-protein-coupled receptor 6 | G-protein coupled receptor activity        | Plasma membrane                   | G protein coupled receptor          | Cell communication;Signal transduction                                                                              | LRR;TM;SP       | Yes                      |
| DYNLL1L1    | 51143   | cytoplasmic dynein 1 light intermediate chain 1                                     | NP_057225.2       | 1          | 9                 | 9          | 19     | 0.95                                              | 1.04                                              | 6.46                                                                         | 3.44                                                                         | 20.6                                                                            | 11.9                                                                            | 11                                                                   | 11                                                                   | 10917   | 51143          | dynein, cytoplasmic, light intermediate polypeptide 1       | Motor activity                             | Cytoskeleton                      | Motor protein                       | Cell growth and/or maintenance                                                                                      | -               | Yes                      |
| DDX58       | 23586   | probable ATP-dependent RNA helicase DDX58                                           | NP_055129.2       | 1          | 15                | 15         | 33     | 0.95                                              | 1.03                                              | 6.15                                                                         | 13.43                                                                        | 23.7                                                                            | 59.6                                                                            | 16                                                                   | 16                                                                   | 13131   | 23586          | DEAD (Asp-Glu-Ala-Asp) box polypeptide 58                   | Molecular function unknown                 | Cytoplasm                         | RNA helicase                        | Regulation of nucleobase, nucleoside, nucleotide and nucleic acid metabolism                                        | DEXDc;HELIC     | No                       |
| SRI         | 6717    | sorcini isoform A                                                                   | NP_003121.1       | 4          | 7                 | 7          | 26     | 0.95                                              | 1.03                                              | 12.4                                                                         | 6.69                                                                         | 44.3                                                                            | 25.3                                                                            | 13                                                                   | 13                                                                   | 1680    | 6717           | sorcini                                                     | Calcium ion binding                        | Cytoplasm                         | Calcium binding protein             | Cell communication;Signal transduction                                                                              | EF              | Yes                      |
| PRMT5       | 10419   | protein arginine N-methyltransferase 5 isoform a                                    | NP_006100.2       | 6          | 11                | 11         | 34     | 0.95                                              | 1.03                                              | 3.76                                                                         | 4.49                                                                         | 15.6                                                                            | 20.4                                                                            | 19                                                                   | 19                                                                   | 4955    | 10419          | SKB1 homolog (S. pombe)                                     | Methyltransferase activity                 | Cytoplasm                         | Enzyme: Methyltransferase           | Cell communication;Signal transduction                                                                              | -               | Yes                      |
| CEP170B     | 283638  | centrosomal protein of 170 kDa protein B isoform 2                                  | NP_055820.2       | 2          | 6                 | 6          | 11     | 0.95                                              | 1.03                                              | 12.2                                                                         | 14.94                                                                        | 26.2                                                                            | 35.4                                                                            | 5                                                                    | 5                                                                    |         |                |                                                             |                                            |                                   |                                     |                                                                                                                     |                 |                          |
| PRPF8       | 10594   | pre-mRNA-processing-splicing factor 8                                               | NP_006436.3       | 1          | 46                | 46         | 112    | 0.95                                              | 1.03                                              | 3.49                                                                         | 3.39                                                                         | 25.7                                                                            | 27                                                                              | 58                                                                   | 58                                                                   | 6295    | 10594          | PRPS pre-mRNA processing factor 8 homolog (yeast)           | RNA binding                                | Nucleus                           | RNA binding protein                 | Regulation of nucleobase, nucleoside, nucleotide and nucleic acid metabolism                                        | JAB             | Yes                      |
| CTNNB1      | 1499    | catenin beta-1                                                                      | NP_001895.1       | 1          | 19                | 23         | 73     | 0.95                                              | 1.01                                              | 4.77                                                                         | 11.39                                                                        | 24.4                                                                            | 65.2                                                                            | 28                                                                   | 27                                                                   | 286     | 1499           | catenin (cadherin-associated protein), beta 1, 88kDa        | Cell adhesion molecule activity            | Plasma membrane;Nucleus;Cytoplasm | Adhesion molecule                   | Cell communication;Signal transduction                                                                              | ARM             | Yes                      |
| CCNL2       | 81669   | cyclin-L2 isoform A                                                                 | NP_112199.2       | 1          | 2                 | 2          | 3      | 0.95                                              | 1                                                 |                                                                              |                                                                              |                                                                                 |                                                                                 | 1                                                                    | 1                                                                    | 10815   | 81669          | cyclin L2                                                   | Transcription regulator activity           | Nucleus                           | Cell cycle control protein          | Cell communication;Signal transduction;Regulation of nucleobase, nucleoside, nucleotide and nucleic acid metabolism | CYCLIN          | No                       |
| TYMP        | 1890    | thymidine phosphorylase isoform 1 proprotein                                        | NP_001944.1       | 2          | 21                | 21         | 67     | 0.95                                              | 1                                                 | 3.6                                                                          | 4.73                                                                         | 19.5                                                                            | 26.2                                                                            | 32                                                                   | 30                                                                   | 8833    | 1890           | endothelial cell growth factor (platelet-derived)           | Growth factor activity                     | Extracellular                     | Growth factor                       | Cell communication;Signal transduction                                                                              | -               | Yes                      |
| NOC2L       | 26155   | nucleolar complex protein 2 homolog                                                 | NP_056473.2       | 1          | 8                 | 8          | 14     | 0.95                                              | 1                                                 | 5.28                                                                         | 4.63                                                                         | 14.3                                                                            | 13.1                                                                            | 8                                                                    | 8                                                                    | 13166   | 26155          |                                                             | Molecular function unknown                 | Nucleolus                         | Unclassified                        | Biological process unknown                                                                                          | -               | Yes                      |

Supplementary Table S1. List of quantified proteins in OKF6/TERT1-Smoke cells  
 Raigopaln *et al.*, 2017. Role of protein kinase N2 (PKN2) in cigarette smoke-mediated oncogenic transformation of oral cells

| Gene Symbol | Gene ID | Protein Description                                                                           | Protein Accession | # Proteins | # Unique Peptides | # Peptides | # PSMs | OKF6/TERT1-Smoke/<br>OKF6/TERT1-Parental<br>(130/126) R1 | OKF6/TERT1-Smoke/<br>OKF6/TERT1-Parental<br>(128/127) R2 | Ratio Standard Errors [%]:<br>OKF6/TERT1-Smoke/<br>OKF6/TERT1-Parental<br>(130/126) R1 | Ratio Standard Errors [%]:<br>OKF6/TERT1-Smoke/<br>OKF6/TERT1-Parental<br>(128/127) R2 | Ratio Variabilities [%]:<br>F13: OKF6/TERT1-<br>Smoke/<br>OKF6/TERT1-Parental<br>(130/126) R1 | Ratio Variabilities [%]:<br>F13: OKF6/TERT1-<br>Smoke/<br>OKF6/TERT1-Parental<br>(128/127) R2 | Ratio Counts: F13:<br>OKF6/TERT1-Smoke/<br>OKF6/TERT1-Parental<br>(130/126) R1 | Ratio Counts: F13:<br>OKF6/TERT1-Smoke/<br>OKF6/TERT1-Parental<br>(128/127) R2 | HPRD ID | Entrez Gene Id | Gene Name                                                    | Molecular Function                           | Primary Localization | Molecular Class                     | Biological Process                                                           | Domains       | Plasma Proteome Database |  |
|-------------|---------|-----------------------------------------------------------------------------------------------|-------------------|------------|-------------------|------------|--------|----------------------------------------------------------|----------------------------------------------------------|----------------------------------------------------------------------------------------|----------------------------------------------------------------------------------------|-----------------------------------------------------------------------------------------------|-----------------------------------------------------------------------------------------------|--------------------------------------------------------------------------------|--------------------------------------------------------------------------------|---------|----------------|--------------------------------------------------------------|----------------------------------------------|----------------------|-------------------------------------|------------------------------------------------------------------------------|---------------|--------------------------|--|
| BRX1        | 55299   | ribosome biogenesis protein BRX1 homolog                                                      | NP_060791.3       | 1          | 8                 | 8          | 14     | 0.95                                                     | 1                                                        | 11.24                                                                                  | 13.48                                                                                  | 28.7                                                                                          | 36.7                                                                                          | 7                                                                              | 7                                                                              | 16563   | 55299          | hbx domain containing 2                                      | Molecular function unknown                   | Nucleolus            | Unclassified                        | Biological process unknown                                                   | -             | Yes                      |  |
| TRIT1       | 54802   | rRNA dimethylallyltransferase, mitochondrial precursor                                        | NP_060116.2       | 1          | 2                 | 2          | 3      | 0.95                                                     | 1                                                        | 12.66                                                                                  | 21.38                                                                                  | 17                                                                                            | 31                                                                                            | 2                                                                              | 2                                                                              | 18226   | 54802          | rRNA isopentenyltransferase 1                                | Transferase activity                         | Cytoplasm            | Enzyme: Transferase                 | Metabolism;Energy pathways                                                   | SP,NLS        | Yes                      |  |
| SNRPE       | 6635    | small nuclear ribonucleoprotein E isoform 1                                                   | NP_003085.1       | 1          | 5                 | 5          | 17     | 0.95                                                     | 0.99                                                     | 10.6                                                                                   | 23.68                                                                                  | 29                                                                                            | 74.2                                                                                          | 8                                                                              | 8                                                                              | 548     | 6635           | small nuclear ribonucleoprotein polypeptide E                | Ribonucleoprotein                            | Nucleus              | Ribonucleoprotein                   | Regulation of nucleobase, nucleoside, nucleotide and nucleic acid metabolism | SM            | Yes                      |  |
| MRPS26      | 64949   | 28S ribosomal protein S26, mitochondrial                                                      | NP_110438.1       | 1          | 1                 | 1          | 2      | 0.95                                                     | 0.99                                                     |                                                                                        |                                                                                        |                                                                                               |                                                                                               | 1                                                                              | 1                                                                              | 17595   | 64949          | mitochondrial ribosomal protein S26                          | Structural constituent of ribosome           | Mitochondrion        | Ribosomal subunit                   | Protein metabolism                                                           | CC            | No                       |  |
| INPP4B      | 8821    | type II inositol 3,4-bisphosphate 4-phosphatase                                               | NP_003857.2       | 1          | 2                 | 2          | 3      | 0.95                                                     | 0.98                                                     |                                                                                        |                                                                                        |                                                                                               |                                                                                               | 1                                                                              | 1                                                                              | 6322    | 8821           | inositol polyphosphate-4-phosphatase, type II,05Da           | Catalytic activity                           | Cytoplasm            | Enzyme: Phosphotransferase          | Cell communication;Signal transduction                                       | CC            | No                       |  |
| FAM91A1     | 157769  | protein FAM91A1                                                                               | NP_659400.2       | 1          | 5                 | 5          | 11     | 0.95                                                     | 0.98                                                     | 19.12                                                                                  | 10.43                                                                                  | 50.9                                                                                          | 27.4                                                                                          | 7                                                                              | 7                                                                              | 8676    | 157769         | None                                                         | Molecular function unknown                   | -                    | Unclassified                        | Biological processes unknown                                                 | -             | No                       |  |
| CUL5        | 8065    | cullin-5                                                                                      | NP_003469.2       | 1          | 6                 | 7          | 8      | 0.95                                                     | 0.97                                                     | 15.3                                                                                   | 21.73                                                                                  | 29.5                                                                                          | 43.9                                                                                          | 4                                                                              | 4                                                                              | 3444    | 8065           | cullin 5                                                     | Ubiquitin-specific protease activity         | Cytoplasm            | Ubiquitin proteasome system protein | Protein metabolism                                                           | CULL          | Yes                      |  |
| TTC37       | 9652    | tetratricopeptide repeat protein 37                                                           | NP_055454.1       | 1          | 14                | 14         | 36     | 0.95                                                     | 0.96                                                     | 3.91                                                                                   | 12.21                                                                                  | 15.4                                                                                          | 51.3                                                                                          | 17                                                                             | 17                                                                             | 11079   | 9652           | KIAA0372                                                     | Molecular function unknown                   | -                    | Unclassified                        | Biological processes unknown                                                 | TPR           | No                       |  |
| MRPL16      | 54948   | 39S ribosomal protein L16, mitochondrial                                                      | NP_060310.1       | 1          | 3                 | 3          | 11     | 0.95                                                     | 0.96                                                     | 1.59                                                                                   | 12.97                                                                                  | 4                                                                                             | 33.9                                                                                          | 7                                                                              | 7                                                                              | 14743   | 54948          | mitochondrial ribosomal protein L16                          | Structural constituent of ribosome           | Mitochondrion        | Ribosomal subunit                   | Protein metabolism                                                           | SP            | No                       |  |
| COX11       | 1353    | cytochrome c oxidase assembly protein COX11, mitochondrial isoform 1                          | NP_004366.1       | 1          | 1                 | 1          | 1      | 0.95                                                     | 0.95                                                     |                                                                                        |                                                                                        |                                                                                               |                                                                                               | 1                                                                              | 1                                                                              | 4709    | 1353           | COX11 homolog, cytochrome c oxidase assembly protein (yeast) | Chaperone activity                           | Mitochondrion        | Chaperone                           | Metabolism;Energy pathways                                                   | TM            | Yes                      |  |
| RPL35A      | 6165    | 60S ribosomal protein L35a                                                                    | NP_000997.2       | 1          | 6                 | 6          | 15     | 0.95                                                     | 0.95                                                     | 8.12                                                                                   | 19.02                                                                                  | 22.2                                                                                          | 54.4                                                                                          | 8                                                                              | 8                                                                              | 1596    | 6165           | ribosomal protein L35a                                       | Structural constituent of ribosome           | Ribosome             | Ribosomal subunit                   | Protein metabolism                                                           | -             | Yes                      |  |
| ANK3        | 288     | ankyrin-3 isoform 1                                                                           | NP_066267.2       | 4          | 2                 | 2          | 2      | 0.95                                                     | 0.95                                                     |                                                                                        |                                                                                        |                                                                                               |                                                                                               | 1                                                                              | 1                                                                              | 2715    | 288            | ankyrin 3, node of Ranvier (ankyrin G)                       | Receptor signaling complex scaffold activity | Plasma membrane      | Adapter molecule                    | Cell communication;Signal transduction                                       | ANK,ZUS,DEATH | Yes                      |  |
| OAS3        | 4940    | 2'-5'-oligoadenylate synthase 3                                                               | NP_006178.2       | 1          | 19                | 19         | 52     | 0.95                                                     | 0.95                                                     | 6.4                                                                                    | 7.77                                                                                   | 31.8                                                                                          | 38.9                                                                                          | 26                                                                             | 26                                                                             | 4519    | 4940           | 2'-5'-oligoadenylate synthetase 3, 100kDa                    | Ligase activity                              | Cytoplasm            | Enzyme: Ligase                      | Immune response                                                              | -             | Yes                      |  |
| MRPL37      | 51253   | 39S ribosomal protein L37, mitochondrial                                                      | NP_057575.2       | 1          | 9                 | 9          | 21     | 0.95                                                     | 0.95                                                     | 5.23                                                                                   | 3.55                                                                                   | 17.4                                                                                          | 11.7                                                                                          | 12                                                                             | 12                                                                             | 14757   | 51253          | mitochondrial ribosomal protein L37                          | Structural constituent of ribosome           | Mitochondrion        | Ribosomal subunit                   | Protein metabolism                                                           | -             | No                       |  |
| MRPL21      | 219927  | 39S ribosomal protein L21, mitochondrial isoform d                                            | NP_852615.1       | 2          | 5                 | 5          | 9      | 0.95                                                     | 0.94                                                     | 9.23                                                                                   | 4.81                                                                                   | 19.8                                                                                          | 10.2                                                                                          | 5                                                                              | 5                                                                              | 14747   | 219927         | mitochondrial ribosomal protein L21                          | Structural constituent of ribosome           | Mitochondrion        | Ribosomal subunit                   | Protein metabolism                                                           | SP            | No                       |  |
| TLDC1       | 57707   | TLD domain-containing protein 1                                                               | NP_065998.3       | 1          | 8                 | 8          | 19     | 0.95                                                     | 0.93                                                     | 7.14                                                                                   | 6.84                                                                                   | 21.6                                                                                          | 20.2                                                                                          | 10                                                                             | 10                                                                             |         |                |                                                              |                                              |                      |                                     |                                                                              |               |                          |  |
| XPO7        | 23039   | exportin-7                                                                                    | NP_055839.3       | 1          | 11                | 11         | 19     | 0.95                                                     | 0.93                                                     | 9.26                                                                                   | 6.32                                                                                   | 29.8                                                                                          | 19.8                                                                                          | 11                                                                             | 11                                                                             | 5846    | 23039          | exportin 7                                                   | Transporter activity                         | Nucleus              | Transport/cargo protein             | Transport                                                                    | IBN,NT        | Yes                      |  |
| TMEM205     | 374882  | transmembrane protein 205                                                                     | NP_940938.1       | 1          | 3                 | 3          | 5      | 0.95                                                     | 0.92                                                     | 11.33                                                                                  | 30.6                                                                                   | 15.3                                                                                          | 41.7                                                                                          | 2                                                                              | 2                                                                              | 18605   | 374882         | None                                                         | Molecular function unknown                   | Integral to membrane | Unclassified                        | Biological processes unknown                                                 | SP,TM         | No                       |  |
| GALT        | 2592    | galactose-1-phosphate uridylyltransferase isoform 1                                           | NP_000146.2       | 2          | 4                 | 4          | 7      | 0.95                                                     | 0.92                                                     | 10.84                                                                                  | 12.18                                                                                  | 20.7                                                                                          | 22.7                                                                                          | 4                                                                              | 4                                                                              | 6106    | 2592           | galactose-1-phosphate uridylyltransferase                    | Nucleotidyltransferase activity              | -                    | Enzyme: Nucleotidyltransferase      | Energy pathways;Metabolism                                                   | -             | No                       |  |
| MYH10       | 4628    | myosin-10 isoform 2                                                                           | NP_005955.3       | 12         | 51                | 77         | 375    | 0.95                                                     | 0.91                                                     | 2.83                                                                                   | 3.59                                                                                   | 25.9                                                                                          | 31.3                                                                                          | 89                                                                             | 88                                                                             | 1178    | 4628           | myosin, heavy polypeptide 10, non-muscle                     | Structural protein                           | Cytoplasm            | Structural protein                  | Cell growth and/or maintenance                                               | CC,IQ,MYOSIN  | Yes                      |  |
| STRIP1      | 85369   | striatin-interacting protein 1 isoform 1                                                      | NP_149079.2       | 2          | 5                 | 5          | 11     | 0.95                                                     | 0.91                                                     | 12.44                                                                                  | 16.99                                                                                  | 29.5                                                                                          | 39.2                                                                                          | 6                                                                              | 6                                                                              |         |                |                                                              |                                              |                      |                                     |                                                                              |               |                          |  |
| BCKDK       | 10295   | [3-methyl-2-oxobutanoate dehydrogenase [lipoamide]] kinase, mitochondrial isoform a precursor | NP_005872.2       | 3          | 2                 | 2          | 5      | 0.95                                                     | 0.89                                                     | 0.89                                                                                   | 5.88                                                                                   | 1.5                                                                                           | 9.1                                                                                           | 3                                                                              | 3                                                                              | 12523   | 10295          | branched chain ketoadid dehydrogenase kinase                 | Catalytic activity                           | Mitochondrion        | Enzyme: Phosphotransferase          | Metabolism;Energy pathways                                                   | -             | Yes                      |  |
| RRAS        | 6237    | ras-related protein R-Ras precursor                                                           | NP_006261.1       | 1          | 4                 | 6          | 26     | 0.95                                                     | 0.87                                                     | 2.32                                                                                   | 6.42                                                                                   | 5.4                                                                                           | 13.7                                                                                          | 6                                                                              | 6                                                                              | 1299    | 6237           | related RAS viral (r-ras) oncogene homolog                   | GTPase activity                              | Plasma membrane      | GTPase                              | Cell communication;Signal transduction                                       | RAS           | Yes                      |  |
| C2orf43     | 60526   | UPF0554 protein C2orf43 isoform X1                                                            | XP_011531316.1    | 5          | 2                 | 2          | 5      | 0.95                                                     | 0.87                                                     | 9.15                                                                                   | 6.73                                                                                   | 12.3                                                                                          | 8.3                                                                                           | 2                                                                              | 2                                                                              | 7113    | 60526          | None                                                         | Molecular function unknown                   | -                    | Unclassified                        | Biological processes unknown                                                 | -             | No                       |  |
| MRPS16      | 51021   | 28S ribosomal protein S16, mitochondrial                                                      | NP_057149.1       | 1          | 2                 | 2          | 3      | 0.95                                                     | 0.87                                                     |                                                                                        |                                                                                        |                                                                                               |                                                                                               | 1                                                                              | 1                                                                              | 14778   | 51021          | mitochondrial ribosomal protein S16                          | Structural constituent of ribosome           | Mitochondrion        | Ribosomal subunit                   | Protein metabolism                                                           | -             | No                       |  |
| SCAMP1      | 9522    | secretory carrier-associated membrane protein 1 isoform 1                                     | NP_004857.4       | 2          | 8                 | 8          | 20     | 0.95                                                     | 0.86                                                     | 10.2                                                                                   | 8.52                                                                                   | 29.7                                                                                          | 22.2                                                                                          | 9                                                                              | 9                                                                              | 6072    | 9522           | secretory carrier membrane protein 1                         | Auxiliary transport protein activity         | Plasma membrane      | Membrane transport protein          | Transport                                                                    | TM,CC         | Yes                      |  |
| ARPC1B      | 10095   | actin-related protein 2/3 complex subunit 1B                                                  | NP_005711.1       | 1          | 10                | 10         | 28     | 0.95                                                     | 0.86                                                     | 7.77                                                                                   | 3.39                                                                                   | 23.7                                                                                          | 9.3                                                                                           | 10                                                                             | 10                                                                             | 10366   | 10095          | actin related protein 2/3 complex, subunit 1B,41kDa          | Cytoskeletal protein binding                 | Plasma membrane      | Cytoskeletal associated protein     | Cell growth and/or maintenance                                               | WD40          | Yes                      |  |
| TARS2       | 80222   | threonine-tRNA ligase, mitochondrial isoform a                                                | NP_079426.2       | 3          | 6                 | 6          | 14     | 0.95                                                     | 0.85                                                     | 7.16                                                                                   | 4.73                                                                                   | 19.5                                                                                          | 11.4                                                                                          | 8                                                                              | 8                                                                              | 18148   | 80222          | threonyl-tRNA synthetase-like 1                              | Ligase activity                              | -                    | Enzyme: Ligase                      | Protein metabolism                                                           | -             | Yes                      |  |
| TXNDC17     | 84817   | thioredoxin domain-containing protein 17                                                      | NP_116120.1       | 1          | 4                 | 4          | 12     | 0.95                                                     | 0.83                                                     | 3.38                                                                                   | 12.34                                                                                  | 7.9                                                                                           | 25.6                                                                                          | 6                                                                              | 6                                                                              | 11656   | 84817          | thioredoxin-like 5                                           | Oxidoreductase activity                      | Cytoplasm            | Enzyme: Oxidoreductase              | Metabolism;Energy pathways                                                   | -             | Yes                      |  |
| STK25       | 10494   | serine/threonine-protein kinase 25 isoform 1                                                  | NP_006365.2       | 4          | 2                 | 9          | 25     | 0.95                                                     | 0.82                                                     | 32.57                                                                                  | 2.26                                                                                   | 45.8                                                                                          | 2.6                                                                                           | 2                                                                              | 2                                                                              | 3770    | 10494          | serine/threonine kinase 25 (STE20 homolog, yeast)            | Protein kinase activity                      | Golgi apparatus      | Serine/threonine kinase             | Cell communication;Signal transduction                                       | S_T_kinase,CC | Yes                      |  |
| MYD88       | 4615    | myeloid differentiation primary response protein MyD88 isoform 1                              | NP_001166038.1    | 5          | 5                 | 5          | 6      | 0.95                                                     | 0.82                                                     | 11.7                                                                                   | 16.51                                                                                  | 22.5                                                                                          | 27.6                                                                                          | 4                                                                              | 4                                                                              | 3703    | 4615           | myeloid differentiation primary response gene (88)           | Receptor signaling complex scaffold activity | Nucleus              | Adapter molecule                    | Cell communication;Signal transduction                                       | DEATH,TIR     | Yes                      |  |
| HPS3        | 84343   | Hermansky-Pudlak syndrome 3 protein isoform 1                                                 | NP_115759.2       | 2          | 1                 | 1          | 1      | 0.95                                                     | 0.8                                                      |                                                                                        |                                                                                        |                                                                                               |                                                                                               | 1                                                                              | 1                                                                              | 5835    | 84343          | Hermansky-Pudlak syndrome 3                                  | Molecular function unknown                   | Cytoplasm            | Unclassified                        | Biological processes unknown                                                 | -             | Yes                      |  |

Supplementary Table S1. List of quantified proteins in OKF6/TERT1-Smoke cells  
 Raingtonan *et al.*, 2017. Role of protein kinase N2 (PKN2) in cigarette smoke-mediated oncogenic transformation of oral cells

| Gene Symbol  | Gene ID   | Protein Description                                           | Protein Accession | # Proteins | # Unique Peptides | # Peptides | # PSMs | OKF6/TERT1-Smoke/<br>OKF6/TERT1-Parental<br>(130/126) R1 | OKF6/TERT1-Smoke/<br>OKF6/TERT1-Parental<br>(128/127) R2 | Ratio Standard Errors [%]:<br>OKF6/TERT1-Smoke/<br>OKF6/TERT1-Parental<br>(130/126) R1 | Ratio Standard Errors [%]:<br>OKF6/TERT1-Smoke/<br>OKF6/TERT1-Parental<br>(128/127) R2 | Ratio Variabilities [%]:<br>F13: OKF6/TERT1-Smoke/<br>OKF6/TERT1-Parental<br>(130/126) R1 | Ratio Variabilities [%]:<br>F13: OKF6/TERT1-Smoke/<br>OKF6/TERT1-Parental<br>(128/127) R2 | Ratio Counts: F13:<br>OKF6/TERT1-Smoke/<br>OKF6/TERT1-Parental<br>(130/126) R1 | Ratio Counts: F13:<br>OKF6/TERT1-Smoke/<br>OKF6/TERT1-Parental<br>(128/127) R2 | HPRD ID | Entrez Gene ID | Gene Name                                                                                      | Molecular Function                                   | Primary Localization | Molecular Class                              | Biological Process                                                                           | Domains              | Plasma Proteome Database |
|--------------|-----------|---------------------------------------------------------------|-------------------|------------|-------------------|------------|--------|----------------------------------------------------------|----------------------------------------------------------|----------------------------------------------------------------------------------------|----------------------------------------------------------------------------------------|-------------------------------------------------------------------------------------------|-------------------------------------------------------------------------------------------|--------------------------------------------------------------------------------|--------------------------------------------------------------------------------|---------|----------------|------------------------------------------------------------------------------------------------|------------------------------------------------------|----------------------|----------------------------------------------|----------------------------------------------------------------------------------------------|----------------------|--------------------------|
| MLLT4        | 4301      | afadin isoform 1                                              | NP_001193937.1    | 1          | 1                 | 17         | 31     | 0.95                                                     | 0.79                                                     |                                                                                        |                                                                                        |                                                                                           |                                                                                           | 1                                                                              | 1                                                                              | 1164    | 4301           | myeloid lymphoid or mixed-lineage leukemia (trithorax homolog, Drosophila); translocated to, 4 | Cell adhesion molecule activity                      | Cytoplasm            | Cell junction protein                        | Cell communication, Signal transduction                                                      | RA,CC,FHA,PDZ        | Yes                      |
| BPHL         | 670       | valacyclovir hydrolase isoform 1 precursor                    | NP_004323.2       | 2          | 1                 | 1          | 1      | 0.95                                                     | 0.77                                                     |                                                                                        |                                                                                        |                                                                                           |                                                                                           | 1                                                                              | 1                                                                              | 4403    | 670            | biphenyl hydrolase-like (serine) hydrolase; heat-stable epithelial mucin-associated antigen    | Hydrolase activity                                   | -                    | Enzyme: Hydrolase                            | Metabolism;Energy pathways                                                                   | SP                   | Yes                      |
| WDR47        | 22911     | WD repeat-containing protein 47 isoform 1                     | NP_001136022.1    | 3          | 3                 | 3          | 5      | 0.95                                                     | 0.74                                                     | 1.71                                                                                   | 11.17                                                                                  | 2.8                                                                                       | 14.4                                                                                      | 3                                                                              | 3                                                                              | 15670   | 22911          | WD repeat domain-47                                                                            | Molecular function unknown                           | -                    | Unclassified                                 | Cell communication, Signal transduction                                                      | LISH,CTLH,WDR40,CC   | Yes                      |
| TRIM5        | 85363     | tripartite motif-containing protein 5 isoform alpha           | NP_149023.2       | 3          | 2                 | 2          | 3      | 0.95                                                     | 0.72                                                     | 3.38                                                                                   | 44.89                                                                                  | 4.6                                                                                       | 48.3                                                                                      | 2                                                                              | 2                                                                              | 7004    | 85363          | tripartite motif-containing 5                                                                  | Ubiquitin-specific protease activity                 | Cytoplasm            | Ubiquitin proteasome system protein          | Protein metabolism                                                                           | RNG,BOX,SPRY,CC      | Yes                      |
| FKBP1A       | 2280      | peptidyl-prolyl cis-trans isomerase FKBP1A isoform a          | NP_000792.1       | 2          | 3                 | 3          | 4      | 0.95                                                     | 0.72                                                     | 14.52                                                                                  | 4.21                                                                                   | 19.6                                                                                      | 4.3                                                                                       | 2                                                                              | 2                                                                              | 1741    | 2280           | FK506 binding protein 1A, 12kDa                                                                | Isomerase activity                                   | Cytoplasm            | Enzyme: Isomerase                            | Cell communication, Signal transduction                                                      | -                    | Yes                      |
| DDRGG1       | 65992     | DDRGG domain-containing protein 1 precursor                   | NP_076424.1       | 1          | 6                 | 6          | 19     | 0.95                                                     | 0.71                                                     | 11.7                                                                                   | 9.55                                                                                   | 34.1                                                                                      | 20.5                                                                                      | 9                                                                              | 9                                                                              | 12741   | 65992          | chromosome 20 open reading frame 116                                                           | Molecular function unknown                           | -                    | Unclassified                                 | Biological process unknown                                                                   | SP,CC                | Yes                      |
| NCKAP1       | 10787     | nck-associated protein 1 isoform 2                            | NP_995314.1       | 2          | 15                | 15         | 35     | 0.95                                                     | 0.68                                                     | 4.7                                                                                    | 12.34                                                                                  | 19                                                                                        | 37.6                                                                                      | 18                                                                             | 19                                                                             | 5353    | 10787          | NCK-associated protein 1                                                                       | Protein binding                                      | Cytoplasm            | Integral membrane protein                    | Cell communication, Signal transduction;Anti-apoptosis                                       | TM                   | Yes                      |
| RAB7B        | 338382    | ras-related protein Rab-7b isoform a                          | NP_001157994.1    | 2          | 2                 | 2          | 3      | 0.95                                                     | 0.65                                                     | 29.09                                                                                  | 35.23                                                                                  | 40.8                                                                                      | 33.1                                                                                      | 2                                                                              | 2                                                                              | 15202   | 338382         | RAB7B, member RAS oncogene family                                                              | RNA binding                                          | Lysosome             | RNA binding protein                          | Biological process unknown                                                                   | RAB                  | No                       |
| RFX1         | 5989      | MHC class II regulatory factor RFX1                           | NP_002909.4       | 1          | 1                 | 1          | 7      | 0.95                                                     |                                                          |                                                                                        |                                                                                        |                                                                                           |                                                                                           | 1                                                                              |                                                                                | 2476    | 5989           | regulatory factor X, 1 (influences HLA class II expression)                                    | Transcription regulatory activity                    | Nucleus              | Transcription regulatory protein             | Regulation of nucleobase, nucleoside, nucleotide and nucleic acid metabolism                 | -                    | Yes                      |
| ADRB2        | 154       | beta-2 adrenergic receptor                                    | NP_000015.1       | 1          | 1                 | 1          | 2      | 0.94                                                     | 1.53                                                     |                                                                                        |                                                                                        |                                                                                           |                                                                                           | 1                                                                              | 1                                                                              | 187     | 154            | adrenergic, beta-2, receptor, surface                                                          | G-protein coupled receptor activity                  | Plasma membrane      | G protein coupled receptor                   | Cell communication, Signal transduction                                                      | TM                   | No                       |
| NPEPL1       | 79716     | probable aminopeptidase NPEPL1 isoform 1                      | NP_078939.3       | 3          | 2                 | 2          | 4      | 0.94                                                     | 1.5                                                      | 3.25                                                                                   | 3.66                                                                                   | 4.3                                                                                       | 7.8                                                                                       | 2                                                                              | 2                                                                              | 7496    | 79716          | aminopeptidase-like 1                                                                          | Aminopeptidase activity                              | -                    | Aminopeptidase                               | Protein metabolism                                                                           | -                    | Yes                      |
| OCRL         | 4952      | inositol polyphosphate 5-phosphatase OCRL-1 isoform a         | NP_000267.2       | 2          | 3                 | 3          | 3      | 0.94                                                     | 1.49                                                     | 23.96                                                                                  | 27.01                                                                                  | 40.6                                                                                      | 79.3                                                                                      | 3                                                                              | 3                                                                              | 2395    | 4952           | oculocerebrorenal syndrome of Lowe                                                             | Catalytic activity;Acid phosphatase activity         | Golgi membrane       | Enzyme: Phosphatase;Enzyme: Phosphohydrolase | Metabolism;Energy pathways;Vesicle-mediated transport;Signal transduction;Cell-cell adhesion | I,Phosphatase;RHOGAP | Yes                      |
| RPP40        | 10799     | ribonuclease P protein subunit p40 isoform a                  | NP_006629.2       | 3          | 2                 | 2          | 3      | 0.94                                                     | 1.42                                                     |                                                                                        |                                                                                        |                                                                                           |                                                                                           | 1                                                                              | 1                                                                              | 9361    | 10799          | ribonuclease P 40kDa subunit                                                                   | Ribonuclease activity                                | Nucleus              | Ribonuclease                                 | Regulation of nucleobase, nucleoside, nucleotide and nucleic acid metabolism                 | -                    | Yes                      |
| MVB12A       | 93343     | multivesicular body subunit 12A isoform 1                     | NP_612410.1       | 2          | 3                 | 3          | 8      | 0.94                                                     | 1.37                                                     | 15.21                                                                                  | 8.66                                                                                   | 32.7                                                                                      | 27.1                                                                                      | 5                                                                              | 5                                                                              |         |                |                                                                                                |                                                      |                      |                                              |                                                                                              |                      |                          |
| VDAC2        | 7417      | voltage-dependent anion-selective channel protein 2 isoform 1 | NP_001171712.1    | 2          | 14                | 14         | 63     | 0.94                                                     | 1.37                                                     | 5.37                                                                                   | 4.04                                                                                   | 29.6                                                                                      | 32.5                                                                                      | 33                                                                             | 33                                                                             | 1904    | 7417           | voltage-dependent anion channel 2                                                              | Voltage-gated ion channel activity                   | Mitochondrion        | Voltage gated channel                        | Transport                                                                                    | -                    | Yes                      |
| WDHD1        | 11169     | WD repeat and HMG-box DNA-binding protein 1 isoform 1         | NP_009017.1       | 2          | 3                 | 3          | 4      | 0.94                                                     | 1.35                                                     | 0.69                                                                                   | 17.44                                                                                  | 1.1                                                                                       | 42.4                                                                                      | 3                                                                              | 3                                                                              | 10483   | 11169          | WD repeat and HMG-box DNA binding protein 1                                                    | DNA binding                                          | Nucleus              | DNA binding protein                          | Regulation of nucleobase, nucleoside, nucleotide and nucleic acid metabolism                 | WD40,CC,HMG          | Yes                      |
| UBE2I        | 7329      | SUMO-conjugating enzyme UBC9                                  | NP_003336.1       | 1          | 2                 | 2          | 5      | 0.94                                                     | 1.35                                                     | 3.95                                                                                   | 7.76                                                                                   | 7.4                                                                                       | 21.2                                                                                      | 4                                                                              | 4                                                                              | 9045    | 7329           | ubiquitin-conjugating enzyme E2I (UBC9 homolog yeast)                                          | Ubiquitin-specific protease activity;Protein binding | Nucleus              | Ubiquitin proteasome system protein          | Protein metabolism                                                                           | UBC                  | Yes                      |
| TMED7-TICAM2 | 100302736 | TRAM adaptor with GOLD domain isoform 1 precursor             | NP_001157940.1    | 3          | 8                 | 8          | 21     | 0.94                                                     | 1.35                                                     | 4.12                                                                                   | 10.94                                                                                  | 12.3                                                                                      | 49.6                                                                                      | 10                                                                             | 10                                                                             |         |                |                                                                                                |                                                      |                      |                                              |                                                                                              |                      |                          |
| EIF3G        | 8666      | eukaryotic translation initiation factor 3 subunit G          | NP_003746.2       | 1          | 12                | 12         | 22     | 0.94                                                     | 1.33                                                     | 3.77                                                                                   | 4.54                                                                                   | 12.8                                                                                      | 22                                                                                        | 13                                                                             | 13                                                                             | 4886    | 8666           | eukaryotic translation initiation factor 3, subunit 4 delta, 44kDa                             | Translation regulator activity                       | Cytoplasm            | Translation regulatory protein               | Protein metabolism                                                                           | RRM                  | Yes                      |
| RNF25        | 64320     | E3 ubiquitin-protein ligase RNF25                             | NP_071898.2       | 1          | 1                 | 1          | 2      | 0.94                                                     | 1.31                                                     |                                                                                        |                                                                                        |                                                                                           |                                                                                           | 1                                                                              | 1                                                                              | 9737    | 64320          | ring finger protein 25                                                                         | Ubiquitin-specific protease activity                 | Nucleus              | Ubiquitin proteasome system protein          | Protein metabolism                                                                           | RWD;RING             | Yes                      |
| TK2          | 7084      | thymidine kinase 2, mitochondrial isoform 1 precursor         | NP_004605.4       | 7          | 1                 | 1          | 2      | 0.94                                                     | 1.3                                                      |                                                                                        |                                                                                        |                                                                                           |                                                                                           | 1                                                                              | 1                                                                              | 1770    | 7084           | thymidine kinase 2, mitochondrial                                                              | Phosphorylase activity                               | Mitochondrion        | Enzyme: Phosphorylase                        | Regulation of nucleobase, nucleoside, nucleotide and nucleic acid metabolism                 | -                    | Yes                      |
| DPYD         | 1806      | dihydropyrimidine dehydrogenase [NADP(+)] isoform 1           | NP_000101.2       | 1          | 2                 | 2          | 3      | 0.94                                                     | 1.27                                                     | 11.33                                                                                  | 0.75                                                                                   | 15.2                                                                                      | 1.3                                                                                       | 2                                                                              | 2                                                                              | 2036    | 1806           | dihydropyrimidine dehydrogenase                                                                | Catalytic activity                                   | Cytoplasm            | Enzyme: Dehydrogenase                        | Metabolism;Energy pathways                                                                   | -                    | Yes                      |
| THUMP3       | 25917     | THUMP domain-containing protein 3                             | NP_056268.2       | 1          | 3                 | 3          | 5      | 0.94                                                     | 1.27                                                     | 10.92                                                                                  | 4.68                                                                                   | 18                                                                                        | 10.3                                                                                      | 3                                                                              | 3                                                                              | 15507   | 25917          | THUMP domain containing 3                                                                      | Molecular function unknown                           | -                    | Unclassified                                 | Biological process unknown                                                                   | -                    | No                       |
| RPL36        | 25873     | 60S ribosomal protein L36                                     | NP_378669.1       | 1          | 5                 | 5          | 21     | 0.94                                                     | 1.22                                                     | 5.54                                                                                   | 10.14                                                                                  | 18.1                                                                                      | 44.9                                                                                      | 12                                                                             | 12                                                                             | 10201   | 25873          | ribosomal protein L36                                                                          | Structural constituent of ribosome                   | Ribosome             | Ribosomal subunit                            | Protein metabolism                                                                           | -                    | Yes                      |
| HNRNP2       | 3188      | heterogeneous nuclear ribonucleoprotein H2                    | NP_062543.1       | 1          | 4                 | 9          | 35     | 0.94                                                     | 1.22                                                     | 13.62                                                                                  | 10.92                                                                                  | 32.3                                                                                      | 33.4                                                                                      | 6                                                                              | 6                                                                              | 3022    | 3188           | heterogeneous nuclear ribonucleoprotein H2(H')                                                 | RNA binding                                          | Nucleus              | Ribonucleoprotein                            | Regulation of nucleobase, nucleoside, nucleotide and nucleic acid metabolism                 | RRM                  | Yes                      |

Supplementary Table S1. List of quantified proteins in OKF6/TERT1-Smoke cells  
 Raigopaln *et al.*, 2017. Role of protein kinase N2 (PKN2) in cigarette smoke-mediated oncogenic transformation of oral cells

| Gene Symbol | Gene ID | Protein Description                                                        | Protein Accession | # Proteins | # Unique Peptides | # Peptides | # PSMs | OKF6/TERT1-Smoke/<br>OKF6/TERT1-Parental<br>(130/126) R1 | OKF6/TERT1-Smoke/<br>OKF6/TERT1-Parental<br>(128/127) R2 | Ratio Standard Errors [%]:<br>OKF6/TERT1-Smoke/<br>OKF6/TERT1-Parental<br>(130/126) R1 | Ratio Standard Errors [%]:<br>OKF6/TERT1-Smoke/<br>OKF6/TERT1-Parental<br>(128/127) R2 | Ratio Variabilities [%]:<br>F13: OKF6/TERT1-<br>Smoke/<br>OKF6/TERT1-Parental<br>(130/126) R1 | Ratio Variabilities [%]:<br>F13: OKF6/TERT1-<br>Smoke/<br>OKF6/TERT1-Parental<br>(128/127) R2 | Ratio Counts: F13:<br>OKF6/TERT1-Smoke/<br>OKF6/TERT1-Parental<br>(130/126) R1 | Ratio Counts: F13:<br>OKF6/TERT1-Smoke/<br>OKF6/TERT1-Parental<br>(128/127) R2 | HPRD<br>ID | Entrez<br>Gene Id | Gene Name                                                                        | Molecular<br>Function                         | Primary<br>Localization | Molecular Class                  | Biological<br>Process                                                        | Domains                       | Plasma<br>Proteome<br>Database |
|-------------|---------|----------------------------------------------------------------------------|-------------------|------------|-------------------|------------|--------|----------------------------------------------------------|----------------------------------------------------------|----------------------------------------------------------------------------------------|----------------------------------------------------------------------------------------|-----------------------------------------------------------------------------------------------|-----------------------------------------------------------------------------------------------|--------------------------------------------------------------------------------|--------------------------------------------------------------------------------|------------|-------------------|----------------------------------------------------------------------------------|-----------------------------------------------|-------------------------|----------------------------------|------------------------------------------------------------------------------|-------------------------------|--------------------------------|
| PSMC4       | 5704    | 26S protease regulatory subunit 6B isoform 1                               | NP_006494.1       | 2          | 13                | 13         | 29     | 0.94                                                     | 1.21                                                     | 6.12                                                                                   | 3.66                                                                                   | 24.7                                                                                          | 18.3                                                                                          | 18                                                                             | 17                                                                             | 4085       | 5704              | proteasome (prosome, macropain) 26S subunit, ATPase, 4                           | Ubiquitin-specific protease activity          | Nucleus                 | Ubiquitin proteasome system      | Protein metabolism                                                           | AAA,CC                        | Yes                            |
| CNOT6       | 57472   | CCR4-NOT transcription complex subunit 6                                   | NP_001290170.1    | 2          | 1                 | 1          | 2      | 0.94                                                     | 1.18                                                     |                                                                                        |                                                                                        |                                                                                               |                                                                                               | 1                                                                              | 1                                                                              | 12341      | 57472             | CCR4-NOT transcription complex, subunit 6                                        | Endonuclease activity                         | Nucleus                 | DNA endonuclease                 | Protein metabolism                                                           | LRR                           | Yes                            |
| PSMD12      | 5718    | 26S proteasome non-ATPase regulatory subunit 12 isoform 1                  | NP_002807.1       | 2          | 19                | 20         | 55     | 0.94                                                     | 1.18                                                     | 9.9                                                                                    | 11.19                                                                                  | 51.2                                                                                          | 77.6                                                                                          | 27                                                                             | 27                                                                             | 5120       | 5718              | proteasome (prosome, macropain) 26S subunit, non-ATPase, 12                      | Ubiquitin-specific protease activity          | Cytoplasm               | Ubiquitin proteasome system      | Protein metabolism                                                           | PINT                          | Yes                            |
| PDP1        | 54704   | pyruvate dehydrogenase phosphatase catalytic subunit 1 isoform 2           | NP_001155252.1    | 2          | 6                 | 6          | 8      | 0.94                                                     | 1.17                                                     | 19.53                                                                                  | 12.41                                                                                  | 42.7                                                                                          | 33.3                                                                                          | 5                                                                              | 5                                                                              | 16185      | 54704             | protein phosphatase 2C, magnesium- and threonine-dependent, catalytic subunit    | Protein serine/threonine phosphatase activity | Mitochondrion           | Serine/threonine phosphatase     | Cell communication,Signal transduction                                       | PP2C                          | Yes                            |
| TRIM32      | 22954   | E3 ubiquitin-protein ligase TRIM32                                         | NP_036342.2       | 1          | 4                 | 4          | 15     | 0.94                                                     | 1.16                                                     | 2.98                                                                                   | 10.51                                                                                  | 7.4                                                                                           | 33.2                                                                                          | 7                                                                              | 7                                                                              | 3797       | 22954             | tripartite motif-containing 52                                                   | Transcription regulator activity              | Nucleus                 | Transcription regulatory protein | Regulation of nucleobase, nucleoside, nucleotide and nucleic acid metabolism | RING,BBOX,CC                  | Yes                            |
| UROD        | 7389    | uroporphyrinogen decarboxylase                                             | NP_000365.3       | 1          | 5                 | 5          | 27     | 0.94                                                     | 1.15                                                     | 6.52                                                                                   | 5.5                                                                                    | 21.4                                                                                          | 21.3                                                                                          | 12                                                                             | 11                                                                             | 1441       | 7389              | uroporphyrinogen decarboxylase                                                   | Carboxy-lyase activity                        | Cytoplasm               | Enzyme: Decarboxylase            | Metabolism:Energy pathways                                                   | -                             | Yes                            |
| HMGXB4      | 10042   | HMG domain-containing protein 4                                            | NP_001003681.1    | 1          | 1                 | 1          | 2      | 0.94                                                     | 1.14                                                     |                                                                                        |                                                                                        |                                                                                               |                                                                                               | 1                                                                              | 1                                                                              | 5267       | 10042             | high-mobility group protein 2-like 1                                             | DNA binding                                   | Nucleus                 | DNA binding protein              | Regulation of nucleobase, nucleoside, nucleotide and nucleic acid metabolism | HMG                           | Yes                            |
| PSMG3       | 84262   | proteasome assembly chaperone 3                                            | NP_115678.1       | 1          | 2                 | 2          | 3      | 0.94                                                     | 1.14                                                     | 22.33                                                                                  | 7.55                                                                                   | 30.2                                                                                          | 12.2                                                                                          | 2                                                                              | 2                                                                              | 14404      | 84262             | None                                                                             | Molecular function unknown                    | -                       | Unclassified                     | Biological process unknown                                                   | -                             | No                             |
| BIN1        | 274     | myc box-dependent-interacting protein 1 isoform 1                          | NP_647593.1       | 10         | 1                 | 1          | 4      | 0.94                                                     | 1.14                                                     | 29.7                                                                                   | 23.47                                                                                  | 41.2                                                                                          | 39.2                                                                                          | 2                                                                              | 2                                                                              | 3150       | 274               | bridging integrator 1                                                            | Receptor signaling complex scaffold activity  | Cytoplasm,Nucleus       | Adapter molecule                 | Cell communication,Signal transduction                                       | BAR,SH3,CC                    | Yes                            |
| ZADH2       | 284273  | zinc-binding alcohol dehydrogenase domain-containing protein 2 isoform 1   | NP_787103.1       | 2          | 2                 | 2          | 4      | 0.94                                                     | 1.14                                                     | 8.7                                                                                    | 32.89                                                                                  | 11.6                                                                                          | 57.1                                                                                          | 2                                                                              | 2                                                                              | 15685      | 284273            | zinc binding alcohol dehydrogenase, domain-containing 2                          | Catalytic activity                            | -                       | Enzyme: Dehydrogenase            | Metabolism:Energy pathways                                                   | -                             | No                             |
| CHCHD6      | 84303   | MICOS complex subunit MIC25                                                | NP_115719.1       | 1          | 1                 | 1          | 1      | 0.94                                                     | 1.14                                                     |                                                                                        |                                                                                        |                                                                                               |                                                                                               | 1                                                                              | 1                                                                              | 13047      | 84303             | coiled-coil-helix-coiled-coil-helix domain-containing 6                          | Molecular function unknown                    | -                       | Unclassified                     | Biological process unknown                                                   | CC                            | Yes                            |
| NUBP2       | 10101   | cytosolic Fe-S cluster assembly factor NUBP2 isoform 1                     | NP_036357.1       | 2          | 5                 | 5          | 11     | 0.94                                                     | 1.13                                                     | 18.39                                                                                  | 7.54                                                                                   | 40.3                                                                                          | 19.3                                                                                          | 5                                                                              | 5                                                                              | 14846      | 10101             | nucleotide binding protein 2 (MinD homolog, E.coli)                              | Molecular function unknown                    | Cytoplasm               | Unclassified                     | Protein metabolism                                                           | -                             | No                             |
| UBR1        | 197131  | E3 ubiquitin-protein ligase UBR1                                           | NP_777576.1       | 1          | 3                 | 3          | 5      | 0.94                                                     | 1.13                                                     | 40.5                                                                                   | 1.2                                                                                    | 57.7                                                                                          | 1.9                                                                                           | 2                                                                              | 2                                                                              | 9342       | 197131            | ubiquitin protein ligase E3 component n-recognin1                                | Ubiquitin-specific protease activity          | -                       | Ubiquitin proteasome system      | Protein metabolism                                                           | -                             | Yes                            |
| KIF3B       | 9371    | kinesin-like protein KIF3B                                                 | NP_004789.1       | 2          | 3                 | 4          | 5      | 0.94                                                     | 1.12                                                     | 5.13                                                                                   | 3.27                                                                                   | 8.4                                                                                           | 6.3                                                                                           | 3                                                                              | 3                                                                              | 4781       | 9371              | kinesin family member 3B                                                         | Motor activity                                | Cytoplasm               | Motor protein                    | Cell growth and/or maintenance                                               | KIS,CC                        | Yes                            |
| PSMF1       | 9491    | proteasome inhibitor PE31 subunit                                          | NP_006805.2       | 1          | 2                 | 2          | 3      | 0.94                                                     | 1.12                                                     | 4.11                                                                                   | 7.15                                                                                   | 5.5                                                                                           | 11.3                                                                                          | 2                                                                              | 2                                                                              | 17919      | 9491              | proteasome (prosome, macropain) inhibitor subunit 1 (PE1)                        | Protease inhibitor activity                   | Nuclear membrane        | Protease inhibitor               | Protein metabolism                                                           | -                             | Yes                            |
| TRAPP4      | 51399   | trafficking protein particle complex subunit 4                             | NP_057230.1       | 1          | 4                 | 4          | 11     | 0.94                                                     | 1.11                                                     | 7.07                                                                                   | 4.21                                                                                   | 14.9                                                                                          | 10.5                                                                                          | 5                                                                              | 5                                                                              | 18220      | 51399             | trafficking protein particle complex 4                                           | Transporter activity                          | Cytoplasm               | Transport/cargo protein          | Transport                                                                    | -                             | Yes                            |
| ACTN4       | 81      | alpha-actinin-4                                                            | NP_004915.2       | 1          | 46                | 67         | 490    | 0.94                                                     | 1.1                                                      | 2.6                                                                                    | 2.42                                                                                   | 32.6                                                                                          | 35.7                                                                                          | 168                                                                            | 168                                                                            | 5222       | 81                | actinin, alpha 4                                                                 | Structural constituent of cytoskeleton        | Cytoplasm               | Cytoskeletal protein             | Cell growth and/or maintenance                                               | CH,SPECTRIN,EF,CC             | Yes                            |
| HTATIP2     | 10553   | oxidoreductase HTATIP2 isoform a precursor                                 | NP_001091990.1    | 3          | 5                 | 5          | 11     | 0.94                                                     | 1.09                                                     | 9.17                                                                                   | 7.81                                                                                   | 23.1                                                                                          | 22.8                                                                                          | 7                                                                              | 7                                                                              | 9288       | 10553             | HIV-1 Tat interactive protein 2, 30kDa                                           | Transcription regulator activity              | Nucleus                 | Transcription regulatory protein | Regulation of nucleobase, nucleoside, nucleotide and nucleic acid metabolism | SP,TM                         | No                             |
| EMC6        | 83460   | ER membrane protein complex subunit 6                                      | NP_001014764.1    | 1          | 1                 | 1          | 2      | 0.94                                                     | 1.08                                                     | 7.8                                                                                    | 4.56                                                                                   | 10.4                                                                                          | 6.9                                                                                           | 2                                                                              | 2                                                                              |            |                   |                                                                                  |                                               |                         |                                  |                                                                              |                               |                                |
| DAD1        | 1603    | dolichyl-diphosphooligosaccharide-protein glycosyltransferase subunit DAD1 | NP_001335.1       | 1          | 3                 | 3          | 7      | 0.94                                                     | 1.08                                                     | 1.47                                                                                   | 1.76                                                                                   | 2.4                                                                                           | 3.3                                                                                           | 3                                                                              | 3                                                                              | 2589       | 1603              | defender against cell death 1                                                    | Receptor signaling complex scaffold activity  | Endoplasmic reticulum   | Adapter molecule                 | Apoptosis                                                                    | TM                            | No                             |
| NOTCH1      | 4851    | neurogenic locus notch homolog protein 1 preproprotein                     | NP_060087.3       | 2          | 11                | 11         | 18     | 0.94                                                     | 1.07                                                     | 5.83                                                                                   | 4.98                                                                                   | 16.5                                                                                          | 16                                                                                            | 9                                                                              | 9                                                                              | 1827       | 4851              | Notch homolog 1, translocation-associated(Drosophila)                            | Transcription regulator activity              | Plasma membrane         | Cell surface receptor            | Anti-apoptosis                                                               | SP,EGF,EGFCA,NOTCH,ANK,TM,NLS | Yes                            |
| ANXA5       | 308     | annexin A5                                                                 | NP_001145.1       | 1          | 20                | 21         | 132    | 0.94                                                     | 1.07                                                     | 5.18                                                                                   | 4.14                                                                                   | 41                                                                                            | 37.1                                                                                          | 65                                                                             | 66                                                                             | 568        | 308               | annexin A5                                                                       | Calcium ion binding                           | Cytoplasm               | Calcium binding protein          | Cell communication,Signal transduction                                       | ANX,SP                        | Yes                            |
| PPT1        | 5538    | palmitoyl-protein thioesterase 1 isoform 1 precursor                       | NP_000301.1       | 2          | 3                 | 3          | 5      | 0.94                                                     | 1.07                                                     | 8.45                                                                                   | 2.19                                                                                   | 13.9                                                                                          | 4.1                                                                                           | 3                                                                              | 3                                                                              | 7203       | 5538              | palmitoyl-protein thioesterase 1 (cereoid-lipofuscinosis, neuronal 1, infantile) | Hydrolase activity                            | Lysosome                | Enzyme: Hydrolase                | Metabolism:Energy pathways                                                   | SP                            | Yes                            |
| FAM21A      | 387680  | WASH complex subunit FAM21A isoform 1                                      | NP_001005171.1    | 2          | 2                 | 17         | 34     | 0.94                                                     | 1.07                                                     | 13.04                                                                                  | 4.47                                                                                   | 17.4                                                                                          | 6.8                                                                                           | 2                                                                              | 2                                                                              | 17364      | 387680            | None                                                                             | Molecular function unknown                    | -                       | Unclassified                     | Biological process unknown                                                   | CC                            | No                             |
| MTCH2       | 23788   | mitochondrial carrier homolog 2 (C. elegans)                               | NP_055157.1       | 1          | 7                 | 7          | 18     | 0.94                                                     | 1.06                                                     | 12.73                                                                                  | 17.12                                                                                  | 39.1                                                                                          | 62.5                                                                                          | 10                                                                             | 10                                                                             | 14788      | 23788             | mitochondrial carrier homolog 2 (C. elegans)                                     | Molecular function unknown                    | Mitochondrion           | Unclassified                     | Cell communication,Signal transduction                                       | SP                            | No                             |



Supplementary Table S1. List of quantified proteins in OKF6/TERT1-Smoke cells  
 Raingopaln *et al.*, 2017. Role of protein kinase N2 (PKN2) in cigarette smoke-mediated oncogenic transformation of oral cells

| Gene Symbol | Gene ID | Protein Description                                                                          | Protein Accession | # Proteins | # Unique Peptides | # Peptides | # PSMs | OKF6/TERT1-Smoke/OKF6/TERT1-Parental (130/126) R1 | OKF6/TERT1-Smoke/OKF6/TERT1-Parental (128/127) R2 | Ratio Standard Errors [%]: OKF6/TERT1-Smoke/OKF6/TERT1-Parental (130/126) R1 | Ratio Standard Errors [%]: OKF6/TERT1-Smoke/OKF6/TERT1-Parental (128/127) R2 | Ratio Variabilities [%]: F13: OKF6/TERT1-Smoke/OKF6/TERT1-Parental (130/126) R1 | Ratio Variabilities [%]: F13: OKF6/TERT1-Smoke/OKF6/TERT1-Parental (128/127) R2 | Ratio Counts: F13: OKF6/TERT1-Smoke/OKF6/TERT1-Parental (130/126) R1 | Ratio Counts: F13: OKF6/TERT1-Smoke/OKF6/TERT1-Parental (128/127) R2 | HPRD ID | Entrez Gene Id | Gene Name                                                                                        | Molecular Function                           | Primary Localization            | Molecular Class                     | Biological Process                                               | Domains              | Plasma Proteome Database |
|-------------|---------|----------------------------------------------------------------------------------------------|-------------------|------------|-------------------|------------|--------|---------------------------------------------------|---------------------------------------------------|------------------------------------------------------------------------------|------------------------------------------------------------------------------|---------------------------------------------------------------------------------|---------------------------------------------------------------------------------|----------------------------------------------------------------------|----------------------------------------------------------------------|---------|----------------|--------------------------------------------------------------------------------------------------|----------------------------------------------|---------------------------------|-------------------------------------|------------------------------------------------------------------|----------------------|--------------------------|
| TJP1        | 7082    | tight junction protein ZO-1 isoform d                                                        | NP_001287955.1    | 4          | 28                | 28         | 51     | 0.94                                              | 0.95                                              | 3.62                                                                         | 3.11                                                                         | 18.5                                                                            | 16                                                                              | 29                                                                   | 29                                                                   | 3002    | 7082           | tight junction protein 1 (zona occludens 1)                                                      | Cell adhesion molecule activity              | Cell surface;Nucleus;Cyttoplasm | Cell junction protein               | Cell growth and/or maintenance                                   | PDZ;SH3;GuKinase;ZUS | Yes                      |
| TMEM201     | 199953  | transmembrane protein 201 isoform 1                                                          | NP_001124596.2    | 2          | 1                 | 1          | 2      | 0.94                                              | 0.95                                              |                                                                              |                                                                              |                                                                                 |                                                                                 | 1                                                                    | 1                                                                    | 17991   | 199953         | None                                                                                             | Molecular function unknown                   | Integral to membrane            | Unclassified                        | Biological process unknown                                       | TM                   | No                       |
| NIT2        | 56954   | omega-amidase NIT2                                                                           | NP_064587.1       | 1          | 11                | 11         | 31     | 0.94                                              | 0.95                                              | 4.95                                                                         | 5.35                                                                         | 19.3                                                                            | 21.3                                                                            | 17                                                                   | 17                                                                   | 17634   | 56954          | nitrilase family member 2                                                                        | Hydrolase activity                           | -                               | Enzyme: Hydrolase                   | Metabolism;Energy pathways                                       | -                    | Yes                      |
| EML2        | 24139   | echinoderm microtubule-associated protein-like 2 isoform 1                                   | NP_001180197.1    | 3          | 12                | 12         | 38     | 0.94                                              | 0.94                                              | 4.18                                                                         | 3.69                                                                         | 18.1                                                                            | 16                                                                              | 21                                                                   | 21                                                                   | 16860   | 24139          | echinoderm microtubule associated protein like 2                                                 | Cytoskeletal protein binding                 | Nucleus                         | Cytoskeletal associated protein     | Cell growth and/or maintenance                                   | WD40                 | Yes                      |
| RPL10       | 6134    | 60S ribosomal protein L10 isoform a                                                          | NP_006004.3       | 5          | 11                | 11         | 80     | 0.94                                              | 0.94                                              | 8                                                                            | 12.95                                                                        | 49.4                                                                            | 88.1                                                                            | 39                                                                   | 39                                                                   | 2421    | 6134           | ribosomal protein L10                                                                            | Structural constituent of ribosome           | Ribosome                        | Ribosomal subunit                   | Protein metabolism                                               | -                    | Yes                      |
| SREK1IP1    | 285672  | protein SREK1IP1                                                                             | NP_776190.1       | 1          | 1                 | 1          | 2      | 0.94                                              | 0.93                                              |                                                                              |                                                                              |                                                                                 |                                                                                 | 1                                                                    | 1                                                                    |         |                | None                                                                                             | Ubiquitin-specific protease activity         | -                               | Ubiquitin proteasome system protein | Protein metabolism                                               | HECT                 | No                       |
| HECTD3      | 79654   | E3 ubiquitin-protein ligase HECTD3                                                           | NP_078878.3       | 1          | 4                 | 4          | 15     | 0.94                                              | 0.91                                              | 4.92                                                                         | 5.4                                                                          | 9.3                                                                             | 9.9                                                                             | 4                                                                    | 4                                                                    | 13383   | 79654          | None                                                                                             | Ubiquitin-specific protease activity         | -                               | Ubiquitin proteasome system protein | Protein metabolism                                               | HECT                 | No                       |
| GMDS        | 2762    | GDP-mannose 4,6 dehydratase isoform 1                                                        | NP_001491.1       | 2          | 6                 | 6          | 10     | 0.94                                              | 0.91                                              | 3.82                                                                         | 15.79                                                                        | 8                                                                               | 32.8                                                                            | 5                                                                    | 5                                                                    | 11925   | 2762           | GDP-mannose 4,6 dehydratase                                                                      | Hydro-lyase activity                         | Cytoplasm                       | Enzyme: Dehydratase                 | Metabolism;Energy pathways                                       | -                    | Yes                      |
| SMARCE1     | 6605    | SWI5NF-related matrix associated actin-dependent regulator of chromatin subfamily E member 1 | NP_003070.3       | 1          | 4                 | 4          | 8      | 0.94                                              | 0.9                                               | 6.52                                                                         | 6.85                                                                         | 12.3                                                                            | 12.3                                                                            | 4                                                                    | 4                                                                    | 4382    | 6605           | SWI5NF related, matrix associated, actin-dependent regulator of chromatin, subfamily e, member 1 | DNA binding                                  | Nucleus                         | DNA binding protein                 | Regulation of nucleobase, nucleotide and nucleic acid metabolism | HMG;CC               | Yes                      |
| ARHGEF1     | 9138    | rho guanine nucleotide exchange factor 1 isoform 1                                           | NP_945353.1       | 3          | 15                | 15         | 26     | 0.94                                              | 0.89                                              | 3.84                                                                         | 3.5                                                                          | 14.5                                                                            | 12.5                                                                            | 16                                                                   | 16                                                                   | 3511    | 9138           | Rho guanine nucleotide exchange factor (GEF)                                                     | Guanyl-nucleotide exchange factor activity   | Cytoplasm                       | Guanine nucleotide exchange factor  | Cell communication;Signal transduction                           | RHOGEF;PH;CC         | Yes                      |
| DYNCL1L2    | 1783    | cytoplasmic dynein 1 light intermediate chain 2 isoform 1                                    | NP_006132.1       | 2          | 8                 | 8          | 26     | 0.94                                              | 0.89                                              | 4.65                                                                         | 7.79                                                                         | 15.8                                                                            | 25.5                                                                            | 13                                                                   | 13                                                                   | 9923    | 1783           | dynein, cytoplasmic, light intermediate polypeptide 2                                            | Molecular function unknown                   | Cytoplasm                       | Unclassified                        | Biological process unknown                                       | -                    | Yes                      |
| HTT         | 3064    | huntingtin                                                                                   | NP_002102.4       | 1          | 4                 | 4          | 5      | 0.94                                              | 0.88                                              | 21.38                                                                        | 25.71                                                                        | 35.9                                                                            | 40.7                                                                            | 3                                                                    | 3                                                                    | 883     | 3064           | huntingtin (Huntington disease)                                                                  | DNA binding                                  | -                               | DNA binding protein                 | Regulation of nucleobase, nucleotide and nucleic acid metabolism | HEAT                 | Yes                      |
| PLOD3       | 8985    | procollagen-lysine, 2-oxoglutarate 5-dioxygenase 3 precursor                                 | NP_001075.1       | 1          | 19                | 19         | 64     | 0.94                                              | 0.88                                              | 3.64                                                                         | 3.24                                                                         | 19.5                                                                            | 16.3                                                                            | 32                                                                   | 32                                                                   | 4347    | 8985           | procollagen-lysine, 2-oxoglutarate-5-dioxygenase 3                                               | Catalytic activity                           | Endoplasmic reticulum           | Enzyme: Hydroxylase                 | Protein metabolism                                               | SP;P4HC              | Yes                      |
| APOO        | 79135   | apolipoprotein O precursor                                                                   | NP_077027.1       | 1          | 2                 | 2          | 3      | 0.94                                              | 0.88                                              | 4.19                                                                         | 10.95                                                                        | 5.6                                                                             | 13.7                                                                            | 2                                                                    | 2                                                                    | 6657    | 79135          | None                                                                                             | Molecular function unknown                   | Mitochondrion                   | Unclassified                        | Biological process unknown                                       | SP;TM                | No                       |
| RNF20       | 56254   | E3 ubiquitin-protein ligase BRE1A                                                            | NP_062538.5       | 1          | 3                 | 4          | 8      | 0.94                                              | 0.87                                              | 7.76                                                                         | 10.98                                                                        | 14.7                                                                            | 19.2                                                                            | 4                                                                    | 4                                                                    | 7410    | 56254          | ring finger protein 20                                                                           | Ubiquitin-specific protease activity         | Nucleus                         | Ubiquitin proteasome system protein | Protein metabolism                                               | CC;RING              | Yes                      |
| GCSH        | 2653    | glycine cleavage system H protein, mitochondrial precursor                                   | NP_004474.2       | 1          | 1                 | 1          | 5      | 0.94                                              | 0.87                                              | 27.82                                                                        | 23.59                                                                        | 48                                                                              | 36.7                                                                            | 3                                                                    | 3                                                                    | 1998    | 2653           | glycine cleavage system protein H (aminomethylcarrier)                                           | Transferase activity                         | Mitochondrion                   | Enzyme: Transferase                 | Metabolism;Energy pathways                                       | SP                   | Yes                      |
| DIS3L2      | 129563  | DIS3-like exonuclease 2 isoform 1                                                            | NP_689596.4       | 2          | 3                 | 3          | 4      | 0.94                                              | 0.87                                              | 2.06                                                                         | 9.5                                                                          | 3.4                                                                             | 14.4                                                                            | 3                                                                    | 3                                                                    | 14619   | 129563         | None                                                                                             | Molecular function unknown                   | -                               | Unclassified                        | Biological process unknown                                       | -                    | No                       |
| NOMO1       | 23420   | nodal modulator 1 precursor                                                                  | NP_055102.3       | 2          | 1                 | 28         | 91     | 0.94                                              | 0.86                                              |                                                                              |                                                                              |                                                                                 |                                                                                 | 1                                                                    | 1                                                                    | 11398   | 23420          | NODAL modulator 1                                                                                | Molecular function unknown                   | Endoplasmic reticulum           | Growth inhibitory factor            | Cell communication;Signal transduction                           | SP;CC                | Yes                      |
| STXBP2      | 6813    | syntaxin-binding protein 2 isoform a                                                         | NP_008880.2       | 3          | 12                | 12         | 22     | 0.94                                              | 0.86                                              | 7.01                                                                         | 9.16                                                                         | 24                                                                              | 28.8                                                                            | 13                                                                   | 13                                                                   | 3423    | 6813           | syntaxin binding protein 2                                                                       | Molecular function unknown                   | Cytoplasm                       | Unclassified                        | Cell communication;Signal transduction                           | -                    | Yes                      |
| PARVB       | 29780   | beta-parvin isoform a                                                                        | NP_001003828.1    | 4          | 1                 | 2          | 5      | 0.94                                              | 0.85                                              |                                                                              |                                                                              |                                                                                 |                                                                                 | 1                                                                    | 1                                                                    | 16284   | 29780          | parvin, beta                                                                                     | Cytoskeletal protein binding                 | -                               | Adhesion molecule                   | Cell adhesion                                                    | CH                   | Yes                      |
| DERA        | 51071   | 2-deoxyribose-phosphate aldolase isoform 1                                                   | NP_057038.2       | 2          | 4                 | 4          | 7      | 0.94                                              | 0.84                                              | 9.1                                                                          | 7.34                                                                         | 14.9                                                                            | 10.7                                                                            | 3                                                                    | 3                                                                    | 13138   | 51071          | 2-deoxyribose-5-phosphate aldolase homolog (C.elegans)                                           | Lyase activity                               | -                               | Enzyme: Lyase                       | Regulation of nucleobase, nucleotide and nucleic acid metabolism | -                    | Yes                      |
| PTAR1       | 375743  | protein prenyltransferase alpha subunit repeat-containing protein 1                          | NP_001093136.1    | 1          | 1                 | 1          | 1      | 0.94                                              | 0.83                                              |                                                                              |                                                                              |                                                                                 |                                                                                 | 1                                                                    | 1                                                                    | 19564   | 375743         | protein prenyltransferase alpha subunit repeat containing 1                                      | Transferase activity                         | -                               | Unclassified                        | Biological process unknown                                       | -                    | No                       |
| SPG7        | 6687    | paraplegin isoform 1 precursor                                                               | NP_003110.1       | 2          | 2                 | 2          | 4      | 0.94                                              | 0.83                                              | 8.4                                                                          | 2.69                                                                         | 11.2                                                                            | 3.2                                                                             | 2                                                                    | 2                                                                    | 4149    | 6687           | spastic paraplegia 7, paraplegin (pure and complicated autosomal recessive)                      | Metallopeptidase activity                    | Mitochondrion                   | Metalloprotease                     | Protein metabolism                                               | SP;TM;CC;AAA         | Yes                      |
| MAD2L1      | 4085    | mitotic spindle assembly checkpoint protein MAD2A                                            | NP_002349.1       | 1          | 2                 | 2          | 3      | 0.94                                              | 0.81                                              |                                                                              |                                                                              |                                                                                 |                                                                                 | 1                                                                    | 1                                                                    | 3274    | 4085           | MAD2 mitotic arrest deficient-like 1 (yeast)                                                     | Protein binding                              | Nucleus                         | Cell cycle control protein          | Cell communication;Signal transduction                           | -                    | Yes                      |
| TRADD       | 8717    | tumor necrosis factor receptor type 1-associated DEATH domain protein                        | NP_003780.1       | 1          | 3                 | 3          | 5      | 0.94                                              | 0.81                                              | 5.98                                                                         | 22.6                                                                         | 11.2                                                                            | 37.9                                                                            | 4                                                                    | 4                                                                    | 4610    | 8717           | TNFRSF1A-associated via death domain                                                             | Receptor signaling complex scaffold activity | Cytoplasm                       | Adapter molecule                    | Cell communication;Signal transduction;Apoptosis                 | DEATH;CC             | Yes                      |
| MFSDB6      | 54842   | major facilitator superfamily domain-containing protein 6                                    | NP_060164.3       | 1          | 2                 | 2          | 4      | 0.94                                              | 0.81                                              | 28.4                                                                         | 26.59                                                                        | 39.1                                                                            | 31.2                                                                            | 2                                                                    | 2                                                                    | 13369   | 54842          | None                                                                                             | Molecular function unknown                   | Plasma membrane                 | Integral membrane protein           | Biological process unknown                                       | TM                   | No                       |
| CAPZA2      | 830     | F-actin-capping protein subunit alpha-2                                                      | NP_006127.1       | 1          | 6                 | 8          | 58     | 0.94                                              | 0.8                                               | 5.36                                                                         | 14.17                                                                        | 23.4                                                                            | 55.8                                                                            | 21                                                                   | 21                                                                   | 11871   | 830            | capping protein (actin filament) muscleZ-line, alpha 2                                           | Structural constituent of cytoskeleton       | Cytoskeleton                    | Cytoskeletal protein                | Cell growth and/or maintenance                                   | -                    | Yes                      |
| RAB3GAP2    | 25782   | rab3 GTPase-activating protein non-catalytic subunit                                         | NP_036546.2       | 2          | 24                | 25         | 42     | 0.94                                              | 0.79                                              | 3.74                                                                         | 5.66                                                                         | 17                                                                              | 21.7                                                                            | 23                                                                   | 23                                                                   | 11471   | 25782          | None                                                                                             | GTPase activator activity                    | Cytoplasmic vesicle             | GTase activating protein            | Cell communication;Signal transduction                           | CC                   | No                       |

Supplementary Table S1. List of quantified proteins in OKF6/TERT1-Smoke cells  
 Raingopaln *et al.*, 2017. Role of protein kinase N2 (PKN2) in cigarette smoke-mediated oncogenic transformation of oral cells

| Gene Symbol | Gene ID | Protein Description                                                                                | Protein Accession | # Proteins | # Unique Peptides | # Peptides | # PSMs | OKF6/TERT1-Smoke/<br>OKF6/TERT1-Parental<br>(130/126) R1 | OKF6/TERT1-Smoke/<br>OKF6/TERT1-Parental<br>(128/127) R2 | Ratio Standard Errors [%]:<br>OKF6/TERT1-Smoke/<br>OKF6/TERT1-Parental<br>(130/126) R1 | Ratio Standard Errors [%]:<br>OKF6/TERT1-Smoke/<br>OKF6/TERT1-Parental<br>(128/127) R2 | Ratio Variabilities [%]:<br>F13: OKF6/TERT1-<br>Smoke/<br>OKF6/TERT1-Parental<br>(130/126) R1 | Ratio Variabilities [%]:<br>F13: OKF6/TERT1-<br>Smoke/<br>OKF6/TERT1-Parental<br>(128/127) R2 | Ratio Counts: F13:<br>OKF6/TERT1-Smoke/<br>OKF6/TERT1-Parental<br>(130/126) R1 | Ratio Counts: F13:<br>OKF6/TERT1-Smoke/<br>OKF6/TERT1-Parental<br>(128/127) R2 | HPRD ID | Entrez Gene ID | Gene Name                                                                                     | Molecular Function                           | Primary Localization | Molecular Class                     | Biological Process                                                           | Domains              | Plasma Proteome Database |
|-------------|---------|----------------------------------------------------------------------------------------------------|-------------------|------------|-------------------|------------|--------|----------------------------------------------------------|----------------------------------------------------------|----------------------------------------------------------------------------------------|----------------------------------------------------------------------------------------|-----------------------------------------------------------------------------------------------|-----------------------------------------------------------------------------------------------|--------------------------------------------------------------------------------|--------------------------------------------------------------------------------|---------|----------------|-----------------------------------------------------------------------------------------------|----------------------------------------------|----------------------|-------------------------------------|------------------------------------------------------------------------------|----------------------|--------------------------|
| CHTF18      | 63922   | chromosome transmission fidelity protein 18 homolog                                                | NP_071375.1       | 1          | 1                 | 1          | 2      | 0.94                                                     | 0.79                                                     |                                                                                        |                                                                                        |                                                                                               |                                                                                               | 1                                                                              | 1                                                                              | 13059   | 63922          | CTF18, chromosome transmission fidelity factor 18 homolog (S. cerevisiae)                     | DNA binding                                  | Nucleus              | DNA binding protein                 | Regulation of nucleobase, nucleoside, nucleotide and nucleic acid metabolism | AAA/CC               | Yes                      |
| ASS1        | 445     | argininosuccinate synthase                                                                         | NP_446464.1       | 1          | 3                 | 3          | 5      | 0.94                                                     | 0.78                                                     | 10.14                                                                                  | 1.48                                                                                   | 16.6                                                                                          | 2                                                                                             | 3                                                                              | 3                                                                              | 4590    | 445            | argininosuccinate synthetase                                                                  | Ligase activity;Catalytic activity           | Cytosol              | Enzyme; Ligase                      | Metabolism;Energy pathways                                                   | -                    | Yes                      |
| ARHGEF10    | 9639    | rho guanine nucleotide exchange factor 10 isoform 3                                                | NP_001295082.1    | 3          | 2                 | 2          | 2      | 0.94                                                     | 0.78                                                     | 10.46                                                                                  | 4.25                                                                                   | 14                                                                                            | 4.7                                                                                           | 2                                                                              | 2                                                                              | 9735    | 9639           | Rho guanine nucleotide exchange factor (GEF)10                                                | Guanyl-nucleotide exchange factor activity   | Cytoplasm            | Guanine nucleotide exchange factor  | Cell communication;Signal transduction                                       | RHOGEF/CC            | Yes                      |
| ATP1B3      | 483     | sodium/potassium-transporting ATPase subunit beta-3                                                | NP_001670.1       | 1          | 6                 | 6          | 10     | 0.94                                                     | 0.78                                                     | 13.48                                                                                  | 8.53                                                                                   | 37.2                                                                                          | 19.1                                                                                          | 8                                                                              | 8                                                                              | 3521    | 483            | ATPase, Na <sup>+</sup> /K <sup>+</sup> -transporting, beta-3 polypeptide                     | ATPase activity                              | Plasma membrane      | ATPase                              | Transport                                                                    | TM                   | No                       |
| APPL2       | 55198   | DCC-interacting protein 13-beta isoform 2                                                          | NP_001238833.1    | 3          | 3                 | 3          | 6      | 0.94                                                     | 0.78                                                     | 9.19                                                                                   | 28.8                                                                                   | 15                                                                                            | 40.3                                                                                          | 3                                                                              | 3                                                                              | 6945    | 55198          | None                                                                                          | Molecular function unknown                   | Endosome             | Unclassified                        | Cell communication;Signal transduction                                       | PH                   | No                       |
| UBXN4       | 23190   | UBX domain-containing protein 4                                                                    | NP_055422.1       | 1          | 2                 | 2          | 10     | 0.94                                                     | 0.77                                                     | 11.42                                                                                  | 8.55                                                                                   | 24.5                                                                                          | 14.9                                                                                          | 5                                                                              | 5                                                                              | 18254   | 23190          | UBX domain containing 2                                                                       | Molecular function unknown                   | -                    | Unclassified                        | Biological processes unknown                                                 | SP/CC/UBX            | Yes                      |
| KIAA0196    | 9897    | WASH complex subunit strumpellin                                                                   | NP_055661.3       | 1          | 6                 | 6          | 8      | 0.94                                                     | 0.75                                                     | 3.25                                                                                   | 8.64                                                                                   | 6.1                                                                                           | 13.1                                                                                          | 4                                                                              | 4                                                                              | 13786   | 9897           | None                                                                                          | Molecular function unknown                   | -                    | Unclassified                        | Biological processes unknown                                                 | -                    | Yes                      |
| SLC16A1     | 6566    | monocarboxylate transporter 1                                                                      | NP_001159968.1    | 1          | 2                 | 2          | 2      | 0.94                                                     | 0.75                                                     | 3.88                                                                                   | 3.07                                                                                   | 5.1                                                                                           | 3.3                                                                                           | 2                                                                              | 2                                                                              | 2816    | 6566           | solute carrier family 16 (monocarboxylic acid transporters), member 1                         | Auxiliary transport protein activity         | Plasma membrane      | Membrane transport protein          | Transport                                                                    | TM                   | Yes                      |
| GDAP2       | 54834   | ganglioside-induced differentiation-associated protein 2 isoform a                                 | NP_060156.1       | 2          | 1                 | 1          | 2      | 0.94                                                     | 0.73                                                     |                                                                                        |                                                                                        |                                                                                               |                                                                                               | 1                                                                              | 1                                                                              | 6576    | 54834          | ganglioside induced differentiation associated protein 2                                      | Molecular function unknown                   | -                    | Unclassified                        | Cell communication;Signal transduction                                       | SEC14/A1pp           | No                       |
| USP28       | 57646   | ubiquitin carboxyl-terminal hydrolase 28 isoform 1                                                 | NP_065937.1       | 1          | 1                 | 1          | 1      | 0.94                                                     | 0.73                                                     |                                                                                        |                                                                                        |                                                                                               |                                                                                               | 1                                                                              | 1                                                                              | 15632   | 57646          | ubiquitin specific protease 28                                                                | Ubiquitin-specific protease activity         | -                    | Ubiquitin proteasome system protein | Protein metabolism                                                           | UIM,UCH/CC           | Yes                      |
| PCBP1       | 5093    | poly(rC)-binding protein 1                                                                         | NP_006187.2       | 3          | 9                 | 12         | 88     | 0.94                                                     | 0.7                                                      | 4.74                                                                                   | 8.03                                                                                   | 25.7                                                                                          | 32.4                                                                                          | 32                                                                             | 32                                                                             | 3128    | 5093           | poly(rC) binding protein 1                                                                    | RNA binding                                  | Nucleus              | RNA binding protein                 | Regulation of nucleobase, nucleoside, nucleotide and nucleic acid metabolism | KH                   | Yes                      |
| SMARCA1     | 50485   | SWI5NF-related matrix-associated actin-dependent regulator of chromatin subfamily A-like protein 1 | NP_054859.2       | 1          | 1                 | 1          | 1      | 0.94                                                     | 0.68                                                     |                                                                                        |                                                                                        |                                                                                               |                                                                                               | 1                                                                              | 1                                                                              | 5969    | 50485          | SWI5NF related, matrix associated, actin dependent regulator of chromatin, subfamily a-like 1 | Transcription regulator activity             | Nucleus              | Transcription regulatory protein    | Regulation of nucleobase, nucleoside, nucleotide and nucleic acid metabolism | DEXDc;HELICc;C       | Yes                      |
| RNASEL      | 6041    | 2-5A-dependent ribonuclease                                                                        | NP_066956.1       | 1          | 2                 | 2          | 6      | 0.94                                                     | 0.66                                                     | 27.13                                                                                  | 6.26                                                                                   | 46.4                                                                                          | 7.2                                                                                           | 3                                                                              | 3                                                                              | 1590    | 6041           | ribonuclease L (2'-5'-oligoadenylates synthetase-dependent)                                   | Ribonuclease activity                        | Cytoplasm            | Ribonuclease                        | Regulation of nucleobase, nucleoside, nucleotide and nucleic acid metabolism | S.T.Y_Kinase;PUG/ANK | Yes                      |
| SERF2       | 10169   | small EDRK-rich factor 2 isoform a                                                                 | NP_001186804.1    | 4          | 1                 | 1          | 2      | 0.94                                                     | 0.61                                                     |                                                                                        |                                                                                        |                                                                                               |                                                                                               | 1                                                                              | 1                                                                              | 5447    | 10169          | small EDRK-rich factor 2                                                                      | Nucleic acid binding                         | Nucleus              | RNA binding protein                 | Regulation of nucleobase, nucleoside, nucleotide and nucleic acid metabolism | -                    | No                       |
| SLC25A40    | 55972   | solute carrier family 25 member 40                                                                 | NP_061331.2       | 1          | 1                 | 1          | 2      | 0.94                                                     | 0.58                                                     |                                                                                        |                                                                                        |                                                                                               |                                                                                               | 1                                                                              | 1                                                                              | 14372   | 55972          | None                                                                                          | Transporter activity                         | Mitochondrion        | Transport/cargo protein             | Transport                                                                    | -                    | No                       |
| FAM96B      | 51647   | mitotic spindle-associated MMXD complex subunit MIP18                                              | NP_057146.1       | 1          | 3                 | 3          | 6      | 0.94                                                     | 0.57                                                     | 8.69                                                                                   | 19.24                                                                                  | 11.6                                                                                          | 15.5                                                                                          | 2                                                                              | 2                                                                              | 13033   | 51647          | None                                                                                          | Molecular function unknown                   | -                    | Unclassified                        | Biological processes unknown                                                 | -                    | Yes                      |
| TRAF2       | 7186    | TNF receptor-associated factor 2                                                                   | NP_066961.2       | 1          | 3                 | 3          | 6      | 0.93                                                     | 1.86                                                     | 1.72                                                                                   | 14.29                                                                                  | 2.3                                                                                           | 38.9                                                                                          | 2                                                                              | 2                                                                              | 3538    | 7186           | TNF receptor-associated factor 2                                                              | Receptor signaling complex scaffold activity | Cytoplasm            | Adapter molecule                    | Cell communication;Signal transduction                                       | RING/MATH/CC;TRAF    | Yes                      |
| PNO1        | 56902   | RNA-binding protein PNO1                                                                           | NP_064528.1       | 1          | 2                 | 2          | 5      | 0.93                                                     | 1.54                                                     | 12.32                                                                                  | 24.77                                                                                  | 20.1                                                                                          | 74.1                                                                                          | 3                                                                              | 3                                                                              | 14250   | 56902          | None                                                                                          | Molecular function unknown                   | -                    | Unclassified                        | Biological processes unknown                                                 | KH                   | Yes                      |
| UCK2        | 7371    | uridine-cytidine kinase 2                                                                          | NP_036606.2       | 1          | 4                 | 4          | 9      | 0.93                                                     | 1.33                                                     | 4.19                                                                                   | 7.2                                                                                    | 8.7                                                                                           | 21.6                                                                                          | 5                                                                              | 5                                                                              | 1882    | 7371           | uridine-cytidine kinase 2                                                                     | Catalytic activity                           | Cytoplasm            | Enzyme; Phosphotransferase          | Regulation of nucleobase, nucleoside, nucleotide and nucleic acid metabolism | -                    | Yes                      |
| DNAJA1      | 3301    | dnaJ homolog subfamily A member 1                                                                  | NP_001530.1       | 4          | 13                | 13         | 54     | 0.93                                                     | 1.29                                                     | 6.26                                                                                   | 5.8                                                                                    | 31.7                                                                                          | 41.3                                                                                          | 28                                                                             | 28                                                                             | 4159    | 3301           | DnaJ (Hsp40) homolog subfamily A, member 1                                                    | Heat shock protein activity                  | Acrosome             | Heat shock protein                  | Protein metabolism                                                           | DNAJ                 | Yes                      |
| ETFA        | 2108    | electron transfer flavoprotein subunit alpha, mitochondrial isoform a                              | NP_000117.1       | 2          | 10                | 10         | 44     | 0.93                                                     | 1.28                                                     | 5.83                                                                                   | 2.07                                                                                   | 25.9                                                                                          | 12.5                                                                                          | 22                                                                             | 22                                                                             | 1979    | 2108           | electron-transfer-flavoprotein, alpha polypeptide (glutamic aciduria II)                      | Auxiliary transport protein activity         | Mitochondrion        | Membrane transport protein          | Metabolism;Energy pathways                                                   | -                    | Yes                      |
| GSTCD       | 79807   | glutathione S-transferase C-terminal domain-containing protein isoform 1                           | NP_001026890.2    | 2          | 1                 | 1          | 1      | 0.93                                                     | 1.27                                                     |                                                                                        |                                                                                        |                                                                                               |                                                                                               | 1                                                                              | 1                                                                              | 7823    | 79807          | None                                                                                          | Molecular function unknown                   | -                    | Unclassified                        | Protein metabolism                                                           | -                    | No                       |
| SLCIA5      | 6510    | neutral amino acid transporter B(0) isoform 1                                                      | NP_005619.1       | 3          | 10                | 10         | 52     | 0.93                                                     | 1.26                                                     | 6.38                                                                                   | 5.63                                                                                   | 28.9                                                                                          | 34.9                                                                                          | 23                                                                             | 23                                                                             | 173     | 6510           | solute carrier family 1 (neutral amino acid transporter), member 5                            | Auxiliary transport protein activity         | Plasma membrane      | Membrane transport protein          | Transport                                                                    | TM                   | Yes                      |
| NHP2        | 55651   | H/ACA ribonucleoprotein complex subunit 2 isoform a                                                | NP_060308.1       | 2          | 7                 | 7          | 22     | 0.93                                                     | 1.25                                                     | 5.13                                                                                   | 12.9                                                                                   | 15.9                                                                                          | 57.5                                                                                          | 11                                                                             | 11                                                                             | 7570    | 55651          | nucleolar protein family A, member 2 (H/ACA small nuclear RNPs)                               | RNA binding                                  | Nucleolus            | Ribonucleoprotein                   | Ribosome biogenesis and assembly                                             | -                    | Yes                      |

Supplementary Table S1. List of quantified proteins in OKF6/TERT1-Smoke cells  
 Raigopaln *et al.*, 2017. Role of protein kinase N2 (PKN2) in cigarette smoke-mediated oncogenic transformation of oral cells

| Gene Symbol | Gene ID | Protein Description                                                   | Protein Accession | # Proteins | # Unique Peptides | # Peptides | # PSMs | OKF6/TERT1-Smoke/<br>OKF6/TERT1-Parental<br>(130/126) R1 | OKF6/TERT1-Smoke/<br>OKF6/TERT1-Parental<br>(128/127) R2 | Ratio Standard Errors [%]:<br>OKF6/TERT1-Smoke/<br>OKF6/TERT1-Parental<br>(130/126) R1 | Ratio Standard Errors [%]:<br>OKF6/TERT1-Smoke/<br>OKF6/TERT1-Parental<br>(128/127) R2 | Ratio Variabilities [%]:<br>F13: OKF6/TERT1-<br>Smoke/<br>OKF6/TERT1-Parental<br>(130/126) R1 | Ratio Variabilities [%]:<br>F13: OKF6/TERT1-<br>Smoke/<br>OKF6/TERT1-Parental<br>(128/127) R2 | Ratio Counts: F13:<br>OKF6/TERT1-Smoke/<br>OKF6/TERT1-Parental<br>(130/126) R1 | Ratio Counts: F13:<br>OKF6/TERT1-Smoke/<br>OKF6/TERT1-Parental<br>(128/127) R2 | HPRD ID | Entrez Gene ID | Gene Name                                                                                                                                                                                                                                                                            | Molecular Function                                      | Primary Localization    | Molecular Class                    | Biological Process                                                           | Domains                   | Plasma Proteome Database |
|-------------|---------|-----------------------------------------------------------------------|-------------------|------------|-------------------|------------|--------|----------------------------------------------------------|----------------------------------------------------------|----------------------------------------------------------------------------------------|----------------------------------------------------------------------------------------|-----------------------------------------------------------------------------------------------|-----------------------------------------------------------------------------------------------|--------------------------------------------------------------------------------|--------------------------------------------------------------------------------|---------|----------------|--------------------------------------------------------------------------------------------------------------------------------------------------------------------------------------------------------------------------------------------------------------------------------------|---------------------------------------------------------|-------------------------|------------------------------------|------------------------------------------------------------------------------|---------------------------|--------------------------|
| IDH3A       | 3419    | isocitrate dehydrogenase [NAD] subunit alpha, mitochondrial precursor | NP_005521.1       | 1          | 5                 | 5          | 13     | 0.93                                                     | 1.25                                                     | 4.55                                                                                   | 6.64                                                                                   | 12                                                                                            | 23.9                                                                                          | 8                                                                              | 8                                                                              | 3094    | 3419           | isocitrate dehydrogenase 3 (NAD+) alpha [Homo sapiens]Oh or Aliases: HGNC:5384Other Designations: H-IDH alpha, NADH)-specific isocitrate dehydrogenase alpha subunit precursor; NAD+-specific IC DH; isocitrate dehydrogenase (NAD+) alpha chain precursor; isocitrate dehydrogenase | Catalytic activity                                      | Mitochondrion           | Enzyme: Dehydrogenase              | Metabolism;Energy pathways                                                   | -                         | Yes                      |
| GNB4        | 59345   | guanine nucleotide-binding protein subunit beta-4                     | NP_067642.1       | 3          | 3                 | 7          | 27     | 0.93                                                     | 1.23                                                     | 7.76                                                                                   | 2.47                                                                                   | 10.2                                                                                          | 4.3                                                                                           | 2                                                                              | 2                                                                              | 9973    | 59345          | guanine nucleotide binding protein (G protein),beta polypeptide 4                                                                                                                                                                                                                    | GTPase activity                                         | Plasma membrane         | G protein                          | Cell communication;Signal transduction                                       | CC;WD40                   | No                       |
| PARS2       | 25973   | probable proline-tRNA ligase, mitochondrial precursor                 | NP_689481.2       | 1          | 3                 | 3          | 6      | 0.93                                                     | 1.21                                                     | 10.34                                                                                  | 0.37                                                                                   | 16.8                                                                                          | 0.8                                                                                           | 3                                                                              | 3                                                                              | 13220   | 25973          | None                                                                                                                                                                                                                                                                                 | Molecular function unknown                              | -                       | Unclassified                       | Biological process unknown                                                   | -                         | No                       |
| PNISR       | 25957   | arginine/serine-rich protein PNISR                                    | NP_116259.2       | 1          | 2                 | 2          | 4      | 0.93                                                     | 1.2                                                      | 25.17                                                                                  | 9.87                                                                                   | 33.9                                                                                          | 16.9                                                                                          | 2                                                                              | 2                                                                              |         |                |                                                                                                                                                                                                                                                                                      |                                                         |                         |                                    |                                                                              |                           |                          |
| MCTS1       | 28985   | malignant T-cell-amplified sequence 1 isoform 2                       | NP_001131026.1    | 2          | 4                 | 4          | 28     | 0.93                                                     | 1.2                                                      | 12.33                                                                                  | 20.36                                                                                  | 43.1                                                                                          | 109                                                                                           | 13                                                                             | 13                                                                             | 6634    | 28985          | malignant T cell amplified sequence 1                                                                                                                                                                                                                                                | DNA binding                                             | Cytoplasm               | Cell cycle control protein         | Cell communication;Signal transduction                                       | -                         | Yes                      |
| RRS1        | 23212   | ribosome biogenesis regulatory protein homolog                        | NP_055984.1       | 1          | 7                 | 7          | 12     | 0.93                                                     | 1.19                                                     | 4.84                                                                                   | 5.69                                                                                   | 11.1                                                                                          | 16.7                                                                                          | 6                                                                              | 6                                                                              | 15277   | 23212          | RRS1 ribosome biogenesis regulator homolog (S cerevisiae)                                                                                                                                                                                                                            | Ribonucleoprotein;Molecular function unknown            | Nucleus                 | Unclassified                       | Cell growth and/or maintenance;Biological process unknown                    | -                         | Yes                      |
| OSBPL5      | 114879  | oxysterol-binding protein-related protein 5 isoform a                 | NP_065947.1       | 2          | 4                 | 5          | 7      | 0.93                                                     | 1.19                                                     | 19.22                                                                                  | 35.18                                                                                  | 31.8                                                                                          | 83.4                                                                                          | 3                                                                              | 3                                                                              | 9475    | 114879         | oxysterol binding protein-like 5                                                                                                                                                                                                                                                     | Transporter activity;Lipid transporter activity         | Cytoplasm               | Transport/cargo protein            | Transport;Lipid transport                                                    | PH;CC                     | Yes                      |
| EIF2D       | 1939    | eukaryotic translation initiation factor 2D isoform 1                 | NP_008824.2       | 2          | 6                 | 6          | 13     | 0.93                                                     | 1.18                                                     | 3.54                                                                                   | 7.52                                                                                   | 8.7                                                                                           | 23.9                                                                                          | 7                                                                              | 7                                                                              |         |                |                                                                                                                                                                                                                                                                                      |                                                         |                         |                                    |                                                                              |                           |                          |
| PTK2        | 5747    | focal adhesion kinase 1 isoform b                                     | NP_005598.3       | 3          | 9                 | 10         | 19     | 0.93                                                     | 1.17                                                     | 6.61                                                                                   | 5.1                                                                                    | 18.6                                                                                          | 18                                                                                            | 9                                                                              | 9                                                                              | 2859    | 5747           | PTK2 protein tyrosine kinase 2                                                                                                                                                                                                                                                       | Protein-tyrosine kinase activity                        | Cytoplasm;Nucleus       | Tyrosine kinase                    | Cell communication;Signal transduction                                       | B41;Tyr_Kinase;CC         | Yes                      |
| PPAN-P2RY11 | 692312  | PPAN-P2RY11 protein isoform 1                                         | NP_001035754.1    | 3          | 4                 | 4          | 10     | 0.93                                                     | 1.16                                                     | 3.86                                                                                   | 2.98                                                                                   | 8                                                                                             | 7.8                                                                                           | 5                                                                              | 5                                                                              | 19032   | 692312         | None                                                                                                                                                                                                                                                                                 | Molecular function unknown                              | -                       | Unclassified                       | Biological process unknown                                                   | CC;TM                     | Yes                      |
| ETF1        | 2107    | eukaryotic peptide chain release factor subunit 1 isoform 1           | NP_004721.1       | 3          | 14                | 14         | 50     | 0.93                                                     | 1.16                                                     | 7.32                                                                                   | 6.24                                                                                   | 35.6                                                                                          | 38.1                                                                                          | 26                                                                             | 26                                                                             | 2616    | 2107           | eukaryotic translation termination factor 1                                                                                                                                                                                                                                          | Translation regulator activity                          | Ribosome                | Translation regulatory protein     | Protein metabolism                                                           | -                         | Yes                      |
| STXBP1      | 6812    | synaptin-binding protein 1 isoform a                                  | NP_003156.1       | 2          | 6                 | 6          | 13     | 0.93                                                     | 1.16                                                     | 8.62                                                                                   | 7.46                                                                                   | 23                                                                                            | 24.8                                                                                          | 8                                                                              | 8                                                                              | 4235    | 6812           | synaptin binding protein 1                                                                                                                                                                                                                                                           | Transporter activity                                    | Plasma membrane;Cytosol | Transport/cargo protein            | Neurotransmitter transport                                                   | -                         | Yes                      |
| RAPGEF1     | 2889    | rap guanine nucleotide exchange factor 1 isoform b                    | NP_941372.1       | 3          | 4                 | 4          | 7      | 0.93                                                     | 1.14                                                     | 9.05                                                                                   | 12.13                                                                                  | 12                                                                                            | 19.8                                                                                          | 2                                                                              | 2                                                                              | 2627    | 2889           | Rap guanine nucleotide exchange factor (GEF)                                                                                                                                                                                                                                         | Guanyl-nucleotide exchange factor activity              | Cytoplasm               | Guanine nucleotide exchange factor | Cell communication;Signal transduction                                       | RasGEFN;RasGEF            | Yes                      |
| NDC1        | 55706   | nucleosin NDC1 isoform 1                                              | NP_060557.3       | 2          | 4                 | 4          | 10     | 0.93                                                     | 1.14                                                     | 2.51                                                                                   | 7.67                                                                                   | 5.2                                                                                           | 19.7                                                                                          | 5                                                                              | 5                                                                              |         |                |                                                                                                                                                                                                                                                                                      |                                                         |                         |                                    |                                                                              |                           |                          |
| MRPL54      | 116541  | 39S ribosomal protein L54, mitochondrial                              | NP_758455.1       | 1          | 1                 | 1          | 2      | 0.93                                                     | 1.14                                                     |                                                                                        |                                                                                        |                                                                                               |                                                                                               | 1                                                                              | 1                                                                              | 14772   | 116541         | mitochondrial ribosomal protein L54                                                                                                                                                                                                                                                  | Structural constituent of ribosome                      | Mitochondrion           | Ribosomal subunit                  | Protein metabolism                                                           | -                         | No                       |
| POLE3       | 54107   | DNA polymerase epsilon subunit 3                                      | NP_001265184.1    | 1          | 1                 | 1          | 2      | 0.93                                                     | 1.13                                                     |                                                                                        |                                                                                        |                                                                                               |                                                                                               | 1                                                                              | 1                                                                              | 6274    | 54107          | polymerase (DNA directed), epsilon 3 (p17 subunit)                                                                                                                                                                                                                                   | DNA binding                                             | Nucleus                 | DNA binding protein                | Regulation of nucleobase, nucleoside, nucleotide and nucleic acid metabolism | CC                        | Yes                      |
| WDR11       | 55717   | WD repeat-containing protein 11                                       | NP_060587.8       | 1          | 5                 | 5          | 12     | 0.93                                                     | 1.13                                                     | 7.5                                                                                    | 12.49                                                                                  | 17.2                                                                                          | 35.6                                                                                          | 6                                                                              | 6                                                                              | 16218   | 55717          | homodomain and WD repeat domain containing 2                                                                                                                                                                                                                                         | Molecular function unknown                              | -                       | Unclassified                       | Biological process unknown                                                   | WD40                      | Yes                      |
| PRCP        | 5547    | lysosomal Pro-X carboxypeptidase isoform 2 preproprotein              | NP_955450.2       | 2          | 3                 | 3          | 4      | 0.93                                                     | 1.12                                                     | 6.76                                                                                   | 3.18                                                                                   | 12.6                                                                                          | 7.2                                                                                           | 4                                                                              | 4                                                                              | 8352    | 5547           | prolylcarboxypeptidase (angiotensinase C)                                                                                                                                                                                                                                            | Carboxypeptidase activity                               | Lysosome                | Carboxypeptidase                   | Protein metabolism                                                           | SP                        | Yes                      |
| RAN         | 5901    | GTP-binding nuclear protein Ran isoform 1                             | NP_006316.1       | 2          | 10                | 10         | 60     | 0.93                                                     | 1.12                                                     | 5.82                                                                                   | 5.41                                                                                   | 30.9                                                                                          | 34.7                                                                                          | 31                                                                             | 31                                                                             | 3109    | 5901           | RAN, member RAS oncogene family                                                                                                                                                                                                                                                      | GTPase activity                                         | Nucleus                 | GTPase                             | Cell communication;Signal transduction                                       | RAS                       | Yes                      |
| MET         | 4233    | hepatocyte growth factor receptor isoform a precursor                 | NP_001120972.1    | 2          | 6                 | 6          | 10     | 0.93                                                     | 1.11                                                     | 9.12                                                                                   | 7.84                                                                                   | 19.1                                                                                          | 19.7                                                                                          | 5                                                                              | 5                                                                              | 1280    | 4233           | met proto-oncogene (hepatocyte growth factor receptor)                                                                                                                                                                                                                               | Transmembrane receptor protein-tyrosine kinase activity | Plasma membrane         | Receptor tyrosine kinase           | Cell communication;Signal transduction                                       | SEMA;PSL1PT;Tyr_Kinase;SP | Yes                      |
| GRIPAP1     | 56850   | GRIP1-associated protein 1                                            | NP_064522.3       | 1          | 6                 | 6          | 17     | 0.93                                                     | 1.11                                                     | 9.52                                                                                   | 8.22                                                                                   | 23.7                                                                                          | 24.4                                                                                          | 7                                                                              | 7                                                                              | 2325    | 56850          | GRIP1 associated protein 1                                                                                                                                                                                                                                                           | Guanyl-nucleotide exchange factor activity              | Cytoplasm               | Guanine nucleotide exchange factor | Cell communication;Signal transduction                                       | CC                        | No                       |
| KIF15       | 56992   | kinesin-like protein KIF15                                            | NP_064627.1       | 1          | 1                 | 1          | 1      | 0.93                                                     | 1.1                                                      |                                                                                        |                                                                                        |                                                                                               |                                                                                               | 1                                                                              | 1                                                                              | 10037   | 56992          | kinesin family member 15                                                                                                                                                                                                                                                             | Protein binding;Protein domain specific binding         | Centrosome              | Cell cycle control protein         | Cell communication;Signal transduction                                       | KISCC;CC                  | Yes                      |
| EIF2B5      | 8893    | translation initiation factor eIF-2B subunit epsilon                  | NP_003898.2       | 1          | 10                | 10         | 22     | 0.93                                                     | 1.09                                                     | 6.09                                                                                   | 5.76                                                                                   | 20.5                                                                                          | 23                                                                                            | 13                                                                             | 13                                                                             | 4898    | 8893           | eukaryotic translation initiation factor 2B, subunit 5 epsilon, 82kDa                                                                                                                                                                                                                | Translation regulator activity                          | Cytoplasm               | Translation regulatory protein     | Protein metabolism                                                           | -                         | Yes                      |
| ETFB        | 2109    | electron transfer flavoprotein subunit beta isoform 1                 | NP_001976.1       | 2          | 16                | 16         | 45     | 0.93                                                     | 1.08                                                     | 5.58                                                                                   | 5.06                                                                                   | 27                                                                                            | 28.3                                                                                          | 26                                                                             | 26                                                                             | 557     | 2109           | electron-transfer-flavoprotein, beta polypeptide                                                                                                                                                                                                                                     | Oxidoreductase activity                                 | Mitochondrion           | Enzyme: Oxidoreductase             | Metabolism;Energy pathways                                                   | -                         | Yes                      |

Supplementary Table S1. List of quantified proteins in OKF6/TERT1-Smoke cells

Raigonpala *et al.*, 2017. Role of protein kinase N2 (PKN2) in cigarette smoke-mediated oncogenic transformation of oral cells

| Gene Symbol | Gene ID | Protein Description                                                      | Protein Accession | # Proteins | # Unique Peptides | # Peptides | # PSMs | OKF6/TERT1-Smoke/<br>OKF6/TERT1-Parental<br>(130/126) R1 | OKF6/TERT1-Smoke/<br>OKF6/TERT1-Parental<br>(128/127) R2 | Ratio Standard Errors [%]:<br>OKF6/TERT1-Smoke/<br>OKF6/TERT1-Parental<br>(130/126) R1 | Ratio Standard Errors [%]:<br>OKF6/TERT1-Smoke/<br>OKF6/TERT1-Parental<br>(128/127) R2 | Ratio Variabilities [%]:<br>F13: OKF6/TERT1-<br>Smoke/<br>OKF6/TERT1-Parental<br>(130/126) R1 | Ratio Variabilities [%]:<br>F13: OKF6/TERT1-<br>Smoke/<br>OKF6/TERT1-Parental<br>(128/127) R2 | Ratio Counts: F13:<br>OKF6/TERT1-Smoke/<br>OKF6/TERT1-Parental<br>(130/126) R1 | Ratio Counts: F13:<br>OKF6/TERT1-Smoke/<br>OKF6/TERT1-Parental<br>(128/127) R2 | HPRD ID | Entrez Gene ID | Gene Name                                                          | Molecular Function                                        | Primary Localization  | Molecular Class                                                | Biological Process                                                           | Domains         | Plasma Proteome Database |
|-------------|---------|--------------------------------------------------------------------------|-------------------|------------|-------------------|------------|--------|----------------------------------------------------------|----------------------------------------------------------|----------------------------------------------------------------------------------------|----------------------------------------------------------------------------------------|-----------------------------------------------------------------------------------------------|-----------------------------------------------------------------------------------------------|--------------------------------------------------------------------------------|--------------------------------------------------------------------------------|---------|----------------|--------------------------------------------------------------------|-----------------------------------------------------------|-----------------------|----------------------------------------------------------------|------------------------------------------------------------------------------|-----------------|--------------------------|
| SLU7        | 10569   | pre-mRNA-splicing factor SLU7                                            | NP_006416.3       | 1          | 2                 | 2          | 2      | 0.93                                                     | 1.07                                                     | 18.82                                                                                  | 23.03                                                                                  | 25.1                                                                                          | 36                                                                                            | 2                                                                              | 2                                                                              | 12074   | 10569          | None                                                               | Ribonucleoprotein                                         | Nucleus               | Unclassified                                                   | Regulation of nucleobase, nucleoside, nucleotide and nucleic acid metabolism | ZnF_C2HC;CC1_RR | No                       |
| BECN1       | 8678    | beclin-1                                                                 | NP_003757.1       | 1          | 1                 | 1          | 2      | 0.93                                                     | 1.07                                                     |                                                                                        |                                                                                        |                                                                                               |                                                                                               | 1                                                                              | 1                                                                              | 5087    | 8678           | beclin 1 (coiled-coil, myosin-like BCL2 interacting protein)       | Receptor signaling complex scaffold activity              | Nucleus               | Adapter molecule                                               | Cell communication;Signal transduction                                       | CC              | Yes                      |
| IPO7        | 10527   | importin-7                                                               | NP_006382.1       | 1          | 14                | 14         | 50     | 0.93                                                     | 1.07                                                     | 5.39                                                                                   | 6.87                                                                                   | 26.4                                                                                          | 39.8                                                                                          | 27                                                                             | 27                                                                             | 9280    | 10527          | importin 7                                                         | Transporter activity                                      | Nucleus               | Transport/cargo protein                                        | Transport                                                                    | -               | Yes                      |
| NHLRC2      | 374354  | NHL repeat-containing protein 2                                          | NP_940916.2       | 1          | 9                 | 9          | 26     | 0.93                                                     | 1.06                                                     | 9.8                                                                                    | 7.76                                                                                   | 32.4                                                                                          | 29                                                                                            | 12                                                                             | 12                                                                             | 14827   | 374354         | NHL repeat containing 2                                            | Molecular function unknown                                | -                     | Unclassified                                                   | Biological process unknown                                                   | -               | No                       |
| RNASEH2B    | 79621   | ribonuclease H2 subunit B isoform 1                                      | NP_078846.2       | 2          | 2                 | 2          | 4      | 0.93                                                     | 1.05                                                     | 11.59                                                                                  | 0.59                                                                                   | 15.4                                                                                          | 0.9                                                                                           | 2                                                                              | 2                                                                              | 7757    | 79621          | None                                                               | Molecular function unknown                                | -                     | Unclassified                                                   | Biological process unknown                                                   | -               | No                       |
| SLC35B2     | 347734  | adenosine 3'-phospho 5'-phosphosulfate transporter 1 isoform a precursor | NP_835361.1       | 6          | 2                 | 2          | 6      | 0.93                                                     | 1.05                                                     | 14.46                                                                                  | 13.98                                                                                  | 23.5                                                                                          | 25.9                                                                                          | 3                                                                              | 3                                                                              | 11576   | 347734         | solute carrier family 35, member B2                                | Auxiliary transport protein activity                      | Golgi apparatus       | Membrane transport protein                                     | Transport                                                                    | TM              | No                       |
| DNAJC17     | 55192   | dnaJ homolog subfamily C member 17                                       | NP_060633.1       | 1          | 2                 | 2          | 3      | 0.93                                                     | 1.05                                                     |                                                                                        |                                                                                        |                                                                                               |                                                                                               | 1                                                                              | 1                                                                              | 7111    | 55192          | None                                                               | Molecular function unknown                                | Nucleus               | Unclassified                                                   | Biological process unknown                                                   | DNAJ;CC         | No                       |
| RRM2B       | 50484   | ribonucleoside-diphosphate reductase subunit M2 B isoform 2              | NP_001165948.1    | 3          | 2                 | 3          | 5      | 0.93                                                     | 1.04                                                     | 3.3                                                                                    | 0.05                                                                                   | 4.3                                                                                           | 0.1                                                                                           | 2                                                                              | 2                                                                              | 5276    | 50484          | ribonucleoside reductase M2 B (TP53 inducible)                     | Catalytic activity                                        | Nucleus               | Enzyme: Reductase                                              | Regulation of nucleobase, nucleoside, nucleotide and nucleic acid metabolism | TM              | No                       |
| OVCA2       | 124641  | ovarian cancer-associated gene 2 protein                                 | NP_543012.1       | 1          | 4                 | 4          | 7      | 0.93                                                     | 1.03                                                     | 6.99                                                                                   | 3.16                                                                                   | 11.3                                                                                          | 5.6                                                                                           | 3                                                                              | 3                                                                              | 7437    | 124641         | None                                                               | Molecular function unknown                                | -                     | Unclassified                                                   | Cell communication;Signal transduction                                       | -               | No                       |
| ACYL        | 47      | ATP-citrate synthase isoform 3                                           | NP_001290203.1    | 4          | 43                | 43         | 179    | 0.93                                                     | 1.02                                                     | 3.51                                                                                   | 2.56                                                                                   | 31.8                                                                                          | 25.3                                                                                          | 91                                                                             | 91                                                                             | 155     | 47             | ATP citrate lyase                                                  | ATPase activity                                           | Cytoplasm             | ATPase                                                         | Metabolism;Energy pathways                                                   | -               | Yes                      |
| ZCCHC6      | 79670   | terminal uridylyltransferase 7 isoform 1                                 | NP_001171988.1    | 2          | 4                 | 4          | 11     | 0.93                                                     | 1.02                                                     | 14.53                                                                                  | 9.22                                                                                   | 30.8                                                                                          | 21.3                                                                                          | 5                                                                              | 5                                                                              | 11697   | 79670          | zinc finger, CCHC domain containing 6                              | DNA binding                                               | Nucleus               | DNA binding protein                                            | Regulation of nucleobase, nucleoside, nucleotide and nucleic acid metabolism | ZnF_C2HC        | Yes                      |
| SPARC       | 6678    | SPARC precursor                                                          | NP_003109.1       | 1          | 2                 | 2          | 3      | 0.93                                                     | 1.01                                                     | 71.55                                                                                  | 6.34                                                                                   | 119.3                                                                                         | 9                                                                                             | 2                                                                              | 2                                                                              | 1631    | 6678           | secreted protein, acidic, cysteine-rich(osteonectin)               | Extracellular matrix structural constituent               | Extracellular         | Secreted polypeptide                                           | Cell growth and/or maintenance                                               | SP;FOLN;KAZAL   | Yes                      |
| TTL12       | 23170   | tubulin-tyrosine ligase-like protein 12                                  | NP_055955.1       | 1          | 23                | 23         | 55     | 0.93                                                     | 1.01                                                     | 4.98                                                                                   | 4.63                                                                                   | 25.8                                                                                          | 26                                                                                            | 30                                                                             | 30                                                                             | 13782   | 23170          | None                                                               | Ligase activity                                           | Nucleus;Cytoplasm     | Enzyme: Ligase                                                 | Metabolism;Energy pathways                                                   | -               | Yes                      |
| MTX1        | 4580    | metaxin-1 isoform 1                                                      | NP_002446.3       | 2          | 4                 | 4          | 11     | 0.93                                                     | 1.01                                                     | 8.93                                                                                   | 12.14                                                                                  | 22.4                                                                                          | 33.2                                                                                          | 7                                                                              | 7                                                                              | 11861   | 4580           | metaxin 1                                                          | Auxiliary transport protein activity;Transporter activity | Mitochondrion         | Membrane transport protein                                     | Transport                                                                    | TM              | No                       |
| TPP2        | 7174    | tripeptidyl-peptidase 2                                                  | NP_003282.2       | 1          | 21                | 21         | 52     | 0.93                                                     | 1.01                                                     | 4.8                                                                                    | 4.8                                                                                    | 23.5                                                                                          | 25.5                                                                                          | 27                                                                             | 27                                                                             | 1834    | 7174           | tripeptidyl peptidase II                                           | Aminopeptidase activity                                   | Cytoplasm             | Aminopeptidase                                                 | Protein metabolism                                                           | CC              | Yes                      |
| EIF2B1      | 1967    | translation initiation factor eIF-2B subunit alpha                       | NP_001405.1       | 1          | 8                 | 8          | 18     | 0.93                                                     | 0.98                                                     | 9.86                                                                                   | 9.08                                                                                   | 29.6                                                                                          | 28.6                                                                                          | 10                                                                             | 10                                                                             | 9458    | 1967           | eukaryotic translation initiation factor 2B subunit 1 alpha, 26kDa | Translation regulator activity                            | Cytoplasm             | Translation regulatory protein                                 | Protein metabolism                                                           | -               | Yes                      |
| TUBGCP4     | 27229   | gamma-tubulin complex component 4 isoform a                              | NP_001273343.1    | 2          | 3                 | 3          | 4      | 0.93                                                     | 0.98                                                     | 2.78                                                                                   | 0.15                                                                                   | 4.5                                                                                           | 0.2                                                                                           | 3                                                                              | 3                                                                              | 10616   | 27229          | None                                                               | Structural constituent of cytoskeleton                    | Centrosome            | Cytoskeletal protein                                           | Cell growth and/or maintenance                                               | SP              | Yes                      |
| FHD1        | 29109   | FHD1/ FH2 domain-containing protein 1                                    | NP_037373.2       | 1          | 12                | 12         | 24     | 0.93                                                     | 0.97                                                     | 7.63                                                                                   | 5.78                                                                                   | 24.9                                                                                          | 19.6                                                                                          | 12                                                                             | 12                                                                             | 6049    | 29109          | Formin homology 2 domain containing 1                              | Cytoskeletal protein binding                              | Cytoplasm             | Cytoskeletal associated protein                                | Cell growth and/or maintenance                                               | FHD;CC;NLS      | Yes                      |
| USP9X       | 8239    | probable ubiquitin carboxyl-terminal hydrolase FAF-X isoform 3           | NP_001034679.2    | 5          | 20                | 20         | 47     | 0.93                                                     | 0.97                                                     | 4.15                                                                                   | 3.52                                                                                   | 17.9                                                                                          | 15.7                                                                                          | 21                                                                             | 21                                                                             | 2091    | 8239           | ubiquitin specific protease 9, X-linked (faucett-like, Drosophila) | Ubiquitin-specific protease activity                      | Cytoplasm;Nucleus     | Ubiquitin proteasome system protein                            | Protein metabolism                                                           | UCH             | Yes                      |
| YARS2       | 51067   | tyrosine-tRNA ligase, mitochondrial precursor                            | NP_001035526.1    | 2          | 11                | 12         | 18     | 0.93                                                     | 0.96                                                     | 6.52                                                                                   | 8.97                                                                                   | 18.3                                                                                          | 26.3                                                                                          | 9                                                                              | 9                                                                              | 13025   | 51067          | None                                                               | Molecular function unknown                                | -                     | Unclassified                                                   | Biological process unknown                                                   | SP              | Yes                      |
| NCLN        | 56926   | nicotin precursor                                                        | NP_064555.2       | 1          | 9                 | 9          | 25     | 0.93                                                     | 0.96                                                     | 4.25                                                                                   | 8.39                                                                                   | 13.2                                                                                          | 27.2                                                                                          | 11                                                                             | 11                                                                             | 7126    | 56926          | nicotin homolog (zebrafish)                                        | Peptidase activity                                        | Plasma membrane       | Protease                                                       | Protein metabolism                                                           | SP;TM           | No                       |
| MAPK1       | 5594    | mitogen-activated protein kinase 1                                       | NP_002736.3       | 1          | 9                 | 12         | 25     | 0.93                                                     | 0.95                                                     | 8.67                                                                                   | 6.22                                                                                   | 20                                                                                            | 14.5                                                                                          | 6                                                                              | 6                                                                              | 1496    | 5594           | mitogen-activated protein kinase 1                                 | Protein serine/threonine kinase activity                  | Cytoplasm             | Serine/threonine kinase                                        | Cell communication;Signal transduction                                       | S_T_kinase      | Yes                      |
| TRAPP3      | 27095   | trafficking protein particle complex subunit 3 isoform 2                 | NP_001257823.1    | 3          | 2                 | 2          | 6      | 0.93                                                     | 0.95                                                     | 5.74                                                                                   | 10.43                                                                                  | 9.3                                                                                           | 17.2                                                                                          | 3                                                                              | 3                                                                              | 11644   | 27095          | trafficking protein particle complex 3                             | Transporter activity                                      | Golgi apparatus       | Transport/cargo protein                                        | Transport                                                                    | -               | No                       |
| MOGS        | 7841    | mammosyl-oligosaccharide glucosidase isoform 1                           | NP_006293.2       | 2          | 17                | 17         | 51     | 0.93                                                     | 0.95                                                     | 2.99                                                                                   | 3.65                                                                                   | 14.5                                                                                          | 18.1                                                                                          | 27                                                                             | 27                                                                             | 3214    | 7841           | None                                                               | Glycosidase activity                                      | Endoplasmic reticulum | Enzyme: Glycosidase                                            | Metabolism;Energy pathways                                                   | TM              | Yes                      |
| LASIL       | 81887   | ribosomal biogenesis protein LASIL isoform 1                             | NP_112483.1       | 3          | 5                 | 5          | 7      | 0.93                                                     | 0.94                                                     | 2.1                                                                                    | 1.95                                                                                   | 3.4                                                                                           | 3.2                                                                                           | 3                                                                              | 3                                                                              | 6519    | 81887          | LASI-like (S. cerevisiae)                                          | Molecular function unknown                                | Nucleus               | Unclassified                                                   | Cell communication;Signal transduction                                       | CC              | No                       |
| RPS18       | 6222    | 40S ribosomal protein S18                                                | NP_072045.1       | 1          | 10                | 10         | 40     | 0.93                                                     | 0.92                                                     | 6.18                                                                                   | 6.17                                                                                   | 28.1                                                                                          | 27.8                                                                                          | 23                                                                             | 23                                                                             | 1601    | 6222           | ribosomal protein S18                                              | Structural constituent of ribosome                        | Ribosome              | Ribosomal subunit                                              | Protein metabolism                                                           | -               | Yes                      |
| MX2         | 4600    | interferon-induced GTP-binding protein Mx2                               | NP_002454.1       | 1          | 14                | 18         | 67     | 0.93                                                     | 0.91                                                     | 5.24                                                                                   | 9.46                                                                                   | 22                                                                                            | 40.1                                                                                          | 20                                                                             | 20                                                                             | 1001    | 4600           | myxovirus (influenza virus) resistance 2 (mouse)                   | GTPase activity                                           | Nucleus               | GTPase                                                         | Immune response                                                              | GED;DYN;NLS     | Yes                      |
| MOB1B       | 92597   | MOB kinase activator 1B isoform 1                                        | NP_001231695.1    | 4          | 4                 | 4          | 13     | 0.93                                                     | 0.9                                                      | 1.92                                                                                   | 3.33                                                                                   | 4.7                                                                                           | 7.9                                                                                           | 7                                                                              | 7                                                                              |         |                |                                                                    |                                                           |                       |                                                                |                                                                              |                 |                          |
| GRHR        | 9380    | glyoxylate reductase/hydroxypyruvate reductase                           | NP_036335.1       | 1          | 9                 | 9          | 36     | 0.93                                                     | 0.9                                                      | 5.98                                                                                   | 6.67                                                                                   | 25.2                                                                                          | 27.5                                                                                          | 20                                                                             | 20                                                                             | 5052    | 9380           | glyoxylate reductase/hydroxypyruvate reductase                     | Catalytic activity                                        | Cytoplasm             | Enzyme: Reductase                                              | Metabolism;Energy pathways                                                   | 2HD             | Yes                      |
| RCC2        | 55920   | protein RCC2                                                             | NP_061185.1       | 1          | 22                | 22         | 60     | 0.93                                                     | 0.9                                                      | 3.04                                                                                   | 7.97                                                                                   | 16.4                                                                                          | 42.8                                                                                          | 33                                                                             | 33                                                                             | 18171   | 55920          | regulator of chromosome condensation 2                             | Protein binding                                           | Nucleus               | Cell cycle control protein                                     | Cell growth and/or maintenance                                               | -               | Yes                      |
| SUGT1       | 10910   | suppressor of G2 allele of SKP1 homolog isoform SGT1 B                   | NP_001124384.1    | 2          | 4                 | 4          | 7      | 0.93                                                     | 0.9                                                      | 10.82                                                                                  | 10.37                                                                                  | 20.3                                                                                          | 18.9                                                                                          | 4                                                                              | 4                                                                              | 9160    | 10910          | SGT1, suppressor of G2 allele of SKP1 (S.cerevisiae)               | Ubiquitin-specific protease activity                      | Nucleus               | Cell cycle control protein;Ubiquitin proteasome system protein | Cell communication;Signal transduction;Protein metabolism                    | TPR             | Yes                      |

Supplementary Table S1. List of quantified proteins in OKF6/TERT1-Smoke cells  
 Raingopaln *et al.*, 2017. Role of protein kinase N2 (PKN2) in cigarette smoke-mediated oncogenic transformation of oral cells

| Gene Symbol | Gene ID | Protein Description                                                | Protein Accession | # Proteins | # Unique Peptides | # Peptides | # PSMs | OKF6/TERT1-Smoke/<br>OKF6/TERT1-Parental<br>(130/126) R1 | OKF6/TERT1-Smoke/<br>OKF6/TERT1-Parental<br>(128/127) R2 | Ratio Standard Errors [%]:<br>OKF6/TERT1-Smoke/<br>OKF6/TERT1-Parental<br>(130/126) R1 | Ratio Standard Errors [%]:<br>OKF6/TERT1-Smoke/<br>OKF6/TERT1-Parental<br>(128/127) R2 | Ratio Variabilities [%]:<br>F13: OKF6/TERT1-<br>Smoke/<br>OKF6/TERT1-Parental<br>(130/126) R1 | Ratio Variabilities [%]:<br>F13: OKF6/TERT1-<br>Smoke/<br>OKF6/TERT1-Parental<br>(128/127) R2 | Ratio Counts: F13:<br>OKF6/TERT1-Smoke/<br>OKF6/TERT1-Parental<br>(130/126) R1 | Ratio Counts: F13:<br>OKF6/TERT1-Smoke/<br>OKF6/TERT1-Parental<br>(128/127) R2 | HPRD ID | Entrez Gene Id | Gene Name                                                                                                                                                                     | Molecular Function                                               | Primary Localization                          | Molecular Class            | Biological Process                                                           | Domains            | Plasma Proteome Database |
|-------------|---------|--------------------------------------------------------------------|-------------------|------------|-------------------|------------|--------|----------------------------------------------------------|----------------------------------------------------------|----------------------------------------------------------------------------------------|----------------------------------------------------------------------------------------|-----------------------------------------------------------------------------------------------|-----------------------------------------------------------------------------------------------|--------------------------------------------------------------------------------|--------------------------------------------------------------------------------|---------|----------------|-------------------------------------------------------------------------------------------------------------------------------------------------------------------------------|------------------------------------------------------------------|-----------------------------------------------|----------------------------|------------------------------------------------------------------------------|--------------------|--------------------------|
| FH          | 2271    | fumarate hydratase, mitochondrial                                  | NP_000134.2       | 6          | 17                | 17         | 71     | 0.93                                                     | 0.9                                                      | 4.05                                                                                   | 5.29                                                                                   | 22.7                                                                                          | 28.7                                                                                          | 35                                                                             | 35                                                                             | 652     | 2271           | fumarate hydratase                                                                                                                                                            | Catalytic activity                                               | Mitochondrion                                 | Enzyme: Hydratase          | Metabolism;Energy pathways                                                   | SP                 | Yes                      |
| ATP6V1H     | 51606   | V-type proton ATPase subunit H isoform 1                           | NP_057025.2       | 2          | 5                 | 5          | 17     | 0.93                                                     | 0.89                                                     | 3.59                                                                                   | 2.3                                                                                    | 9.4                                                                                           | 5.8                                                                                           | 8                                                                              | 8                                                                              | 10591   | 51606          | ATPase, H+-transporting, lysosomal 50/57kDa, V1 subunit H                                                                                                                     | ATPase activity                                                  | -                                             | ATPase                     | Transport                                                                    | ARM                | No                       |
| GDF15       | 9518    | growth differentiation factor 15 precursor                         | NP_004855.2       | 1          | 3                 | 3          | 4      | 0.93                                                     | 0.89                                                     | 19.22                                                                                  | 9.94                                                                                   | 31.8                                                                                          | 15.4                                                                                          | 3                                                                              | 3                                                                              | 5608    | 9518           | growth differentiation factor 15                                                                                                                                              | Growth factor activity                                           | Extracellular                                 | Growth factor              | Cell communication;Signal transduction                                       | SP;TGFB            | Yes                      |
| ACSS2       | 55902   | acetyl-coenzyme A synthetase, cytoplasmic isoform 2                | NP_001070020.2    | 3          | 7                 | 7          | 17     | 0.93                                                     | 0.89                                                     | 9.51                                                                                   | 5.49                                                                                   | 26.9                                                                                          | 14.7                                                                                          | 9                                                                              | 9                                                                              | 12053   | 55902          | acetyl-Coenzyme A synthetase 2 (ADP forming)                                                                                                                                  | Catalytic activity                                               | Cytoplasm                                     | Enzyme: Ligase             | Metabolism;Energy pathways                                                   | -                  | Yes                      |
| SHC1        | 6464    | SHC-transforming protein 1 isoform 3                               | NP_001123512.1    | 6          | 6                 | 6          | 18     | 0.93                                                     | 0.89                                                     | 6.33                                                                                   | 10.46                                                                                  | 17.7                                                                                          | 28.6                                                                                          | 9                                                                              | 9                                                                              | 2780    | 6464           | SHC (Src homology 2 domain containing) transforming protein 1                                                                                                                 | Protein binding                                                  | Cytoplasm                                     | Adapter molecule           | Signal transduction;Cell communication                                       | PTB;SH2            | Yes                      |
| SRP19       | 6728    | signal recognition particle 19 kDa protein isoform 1               | NP_003126.1       | 4          | 6                 | 6          | 10     | 0.93                                                     | 0.89                                                     | 17.28                                                                                  | 1.47                                                                                   | 37.2                                                                                          | 2.9                                                                                           | 5                                                                              | 5                                                                              | 1644    | 6728           | signal recognition particle 19kDa                                                                                                                                             | RNA binding                                                      | Cytoplasm                                     | RNA binding protein        | Protein metabolism                                                           | -                  | No                       |
| SNTB2       | 6645    | beta-2-syntrophin                                                  | NP_006741.1       | 1          | 5                 | 5          | 9      | 0.93                                                     | 0.87                                                     | 11.08                                                                                  | 13.21                                                                                  | 23.2                                                                                          | 26.1                                                                                          | 5                                                                              | 5                                                                              | 2491    | 6645           | syntrophin, beta 2 (dystrophin-associated protein A1, 59kDa, basic component 2)                                                                                               | Receptor signaling complex scaffold activity                     | Cytoplasm;Nucleus                             | Adapter molecule           | Signal transduction                                                          | PDZ;PH             | Yes                      |
| ESRP2       | 80004   | epithelial splicing regulatory protein 2                           | NP_079215.2       | 1          | 5                 | 5          | 9      | 0.93                                                     | 0.86                                                     | 15.43                                                                                  | 11.27                                                                                  | 29.4                                                                                          | 17                                                                                            | 4                                                                              | 3                                                                              | 7971    | 80004          | None                                                                                                                                                                          | RNA binding                                                      | Nucleus                                       | RNA binding protein        | Regulation of nucleobase, nucleoside, nucleotide and nucleic acid metabolism | RRM                | No                       |
| STAT3       | 6774    | signal transducer and activator of transcription 3 isoform 1       | NP_644805.1       | 3          | 18                | 18         | 38     | 0.93                                                     | 0.85                                                     | 3.36                                                                                   | 5.52                                                                                   | 14.7                                                                                          | 22.2                                                                                          | 22                                                                             | 22                                                                             | 26      | 6774           | signal transducer and activator of transcription 3 (acute-phase response factor)                                                                                              | Transcription factor activity                                    | Nucleus;Extracellular matrix                  | Transcription factor       | Regulation of nucleobase, nucleoside, nucleotide and nucleic acid metabolism | SH2;CC             | Yes                      |
| DNM2        | 1785    | dynamitin-2 isoform 1                                              | NP_001005560.1    | 5          | 16                | 21         | 57     | 0.93                                                     | 0.83                                                     | 4.33                                                                                   | 11.14                                                                                  | 19.9                                                                                          | 47.9                                                                                          | 24                                                                             | 24                                                                             | 3852    | 1785           | dynamitin 2 [Homo sapiens] Other Aliases: HGNC: 2974, DYNC, DYNL Other Designations: DYN2_HUMAN [AA 474- 870]; cytoskeletal protein; dynamitin II; dynamitin II [AA 474- 866] | GTPase activity                                                  | Cytoskeleton                                  | GTPase                     | Cell communication;Signal transduction                                       | DYNC;PH;GED        | Yes                      |
| TMTC3       | 160418  | transmembrane and TPR repeat-containing protein 3                  | NP_861448.2       | 1          | 10                | 10         | 17     | 0.93                                                     | 0.82                                                     | 3.67                                                                                   | 12.34                                                                                  | 10.8                                                                                          | 32.9                                                                                          | 10                                                                             | 10                                                                             | 10243   | 160418         | None                                                                                                                                                                          | Molecular function unknown                                       | -                                             | Unclassified               | Biological process unknown                                                   | TM;TPR             | No                       |
| NEFL        | 4747    | neurofilament light polypeptide                                    | NP_006149.2       | 4          | 8                 | 9          | 24     | 0.93                                                     | 0.81                                                     | 6.29                                                                                   | 14.48                                                                                  | 15.6                                                                                          | 31.7                                                                                          | 7                                                                              | 7                                                                              | 1206    | 4747           | neurofilament, light polypeptide 68kDa                                                                                                                                        | Structural molecule activity                                     | Cytoplasm                                     | Structural protein         | Cell growth and/or maintenance                                               | CC                 | Yes                      |
| MYO10       | 4651    | unconventional myosin-X                                            | NP_036466.2       | 1          | 3                 | 3          | 3      | 0.93                                                     | 0.8                                                      | 2.58                                                                                   | 34.56                                                                                  | 3.4                                                                                           | 40.5                                                                                          | 2                                                                              | 2                                                                              | 3283    | 4651           | myosin X                                                                                                                                                                      | Motor activity                                                   | Cytoplasm                                     | Motor protein              | Cell growth and/or maintenance                                               | MYOSIN;IQ;PH;B4;CC | Yes                      |
| APOOL       | 139322  | MICOS complex subunit MIC27 precursor                              | NP_940852.3       | 1          | 3                 | 3          | 5      | 0.93                                                     | 0.8                                                      | 10.95                                                                                  | 10.18                                                                                  | 14.5                                                                                          | 11.5                                                                                          | 2                                                                              | 2                                                                              | 16775   | 139322         | chromosome X open reading frame 33                                                                                                                                            | Molecular function unknown                                       | Nucleus                                       | Unclassified               | Biological process unknown                                                   | -                  | No                       |
| NRAS        | 4893    | GTPase NRas                                                        | NP_002515.1       | 1          | 3                 | 9          | 27     | 0.93                                                     | 0.77                                                     | 8.05                                                                                   | 5.56                                                                                   | 18.4                                                                                          | 10.6                                                                                          | 6                                                                              | 6                                                                              | 1273    | 4893           | neuroblastoma RAS viral (v-ras) oncogene homolog                                                                                                                              | GTPase activity                                                  | Plasma membrane                               | GTPase                     | Cell communication;Signal transduction                                       | RAS                | Yes                      |
| SCP2        | 6342    | non-specific lipid-transfer protein isoform 1 proprotein           | NP_002970.2       | 6          | 1                 | 1          | 1      | 0.93                                                     | 0.77                                                     |                                                                                        |                                                                                        |                                                                                               |                                                                                               | 1                                                                              | 1                                                                              | 1700    | 6342           | sterol carrier protein 2                                                                                                                                                      | Auxiliary transport protein activity;Sterol transporter activity | Cytoplasm                                     | Membrane transport protein | Transport;Lipid metabolism                                                   | -                  | Yes                      |
| MFSF10      | 10227   | major facilitator superfamily domain-containing protein 10         | NP_001111.3       | 1          | 4                 | 4          | 9      | 0.93                                                     | 0.73                                                     | 11.28                                                                                  | 4.4                                                                                    | 21.2                                                                                          | 6.4                                                                                           | 4                                                                              | 4                                                                              | 10265   | 10227          | None                                                                                                                                                                          | Molecular function unknown                                       | -                                             | Unclassified               | Biological process unknown                                                   | -                  | Yes                      |
| ATL2        | 64225   | atlastin-2 isoform 2                                               | NP_001129145.1    | 3          | 2                 | 2          | 7      | 0.93                                                     | 0.71                                                     | 49.97                                                                                  | 38.63                                                                                  | 73.3                                                                                          | 40.2                                                                                          | 2                                                                              | 2                                                                              | 10662   | 64225          | ADP-ribosylation factor-like 6 interacting protein 2                                                                                                                          | Molecular function unknown                                       | Nucleus                                       | Unclassified               | Biological process unknown                                                   | TM;CC              | No                       |
| MAN2C1      | 4123    | alpha-mannosidase 2C1 isoform 2                                    | NP_001243423.1    | 4          | 1                 | 1          | 2      | 0.93                                                     | 0.69                                                     |                                                                                        |                                                                                        |                                                                                               |                                                                                               | 1                                                                              | 1                                                                              | 1109    | 4123           | mannosidase, alpha, class 2C, member 1                                                                                                                                        | Hydrolase activity                                               | Cytoplasm                                     | Enzyme: Hydrolase          | Metabolism;Energy pathways                                                   | -                  | Yes                      |
| RPAP1       | 26015   | RNA polymerase II-associated protein 1                             | NP_056355.2       | 1          | 1                 | 1          | 2      | 0.93                                                     | 0.69                                                     |                                                                                        |                                                                                        |                                                                                               |                                                                                               | 1                                                                              | 1                                                                              | 11522   | 26015          | RNA polymerase II associated protein 1                                                                                                                                        | Molecular function unknown                                       | -                                             | Unclassified               | Biological process unknown                                                   | -                  | No                       |
| VAPA        | 9218    | vesicle-associated membrane protein-associated protein A isoform 2 | NP_919415.2       | 2          | 10                | 11         | 40     | 0.93                                                     | 0.68                                                     | 3.9                                                                                    | 13.74                                                                                  | 15.8                                                                                          | 42.6                                                                                          | 19                                                                             | 19                                                                             | 9299    | 9218           | VAMP (vesicle-associated membrane protein) associated protein A, 33kDa                                                                                                        | Auxiliary transport protein activity                             | Endoplasmic reticulum membrane;Golgi membrane | Membrane transport protein | Vesicle docking;Transport                                                    | CC;TM              | Yes                      |
| STMN1       | 3925    | stathmin isoform a                                                 | NP_005554.1       | 4          | 7                 | 7          | 43     | 0.93                                                     | 0.67                                                     | 3.6                                                                                    | 9.32                                                                                   | 14.2                                                                                          | 26.8                                                                                          | 18                                                                             | 18                                                                             | 1047    | 3925           | stathmin 1 (oncoprotein 18)                                                                                                                                                   | Structural molecule activity;Signal transducer activity          | Cytoplasm                                     | Structural protein         | Cell growth and/or maintenance;Signal transduction                           | CC                 | Yes                      |
| CCNL        | 79616   | cyclin-J-like protein isoform a                                    | NP_078841.3       | 1          | 1                 | 1          | 1      | 0.93                                                     | 0.62                                                     |                                                                                        |                                                                                        |                                                                                               |                                                                                               | 1                                                                              | 1                                                                              | 7853    | 79616          | None                                                                                                                                                                          | Molecular function unknown                                       | -                                             | Cell cycle control protein | Cell communication;Signal transduction                                       | CYCLIN             | No                       |

Supplementary Table S1. List of quantified proteins in OKF6/TERT1-Smoke cells  
 Raingopaln *et al.*, 2017. Role of protein kinase N2 (PKN2) in cigarette smoke-mediated oncogenic transformation of oral cells

| Gene Symbol | Gene ID | Protein Description                                                               | Protein Accession | # Proteins | # Unique Peptides | # Peptides | # PSMs | OKF6/TERT1-Smoke/<br>OKF6/TERT1-Parental<br>(130/126) R1 | OKF6/TERT1-Smoke/<br>OKF6/TERT1-Parental<br>(128/127) R2 | Ratio Standard Errors [%]:<br>OKF6/TERT1-Smoke/<br>OKF6/TERT1-Parental<br>(130/126) R1 | Ratio Standard Errors [%]:<br>OKF6/TERT1-Smoke/<br>OKF6/TERT1-Parental<br>(128/127) R2 | Ratio Variabilities [%]:<br>F13: OKF6/TERT1-<br>Smoke/<br>OKF6/TERT1-Parental<br>(130/126) R1 | Ratio Variabilities [%]:<br>F13: OKF6/TERT1-<br>Smoke/<br>OKF6/TERT1-Parental<br>(128/127) R2 | Ratio Counts: F13:<br>OKF6/TERT1-Smoke/<br>OKF6/TERT1-Parental<br>(130/126) R1 | Ratio Counts: F13:<br>OKF6/TERT1-Smoke/<br>OKF6/TERT1-Parental<br>(128/127) R2 | HPRD ID | Entrez Gene Id | Gene Name                                                                                | Molecular Function                            | Primary Localization  | Molecular Class                     | Biological Process                                                           | Domains                         | Plasma Proteome Database |
|-------------|---------|-----------------------------------------------------------------------------------|-------------------|------------|-------------------|------------|--------|----------------------------------------------------------|----------------------------------------------------------|----------------------------------------------------------------------------------------|----------------------------------------------------------------------------------------|-----------------------------------------------------------------------------------------------|-----------------------------------------------------------------------------------------------|--------------------------------------------------------------------------------|--------------------------------------------------------------------------------|---------|----------------|------------------------------------------------------------------------------------------|-----------------------------------------------|-----------------------|-------------------------------------|------------------------------------------------------------------------------|---------------------------------|--------------------------|
| SIN3B       | 23309   | paired amphipathic helix protein Sin3b isoform 1                                  | NP_056075.1       | 2          | 1                 | 1          | 2      | 0.92                                                     | 1.98                                                     |                                                                                        |                                                                                        |                                                                                               |                                                                                               | 1                                                                              | 1                                                                              | 9691    | 23309          | SIN3 homolog B, transcription regulator protein                                          | Translation regulator activity                | Nucleus               | Translation regulatory protein      | Regulation of nucleobase, nucleoside, nucleotide and nucleic acid metabolism | PAHCC                           | Yes                      |
| PRR12       | 57479   | proline-rich protein 12                                                           | NP_065770.1       | 1          | 1                 | 1          | 2      | 0.92                                                     | 1.94                                                     |                                                                                        |                                                                                        |                                                                                               |                                                                                               | 1                                                                              | 1                                                                              | 19620   | 57479          | proline rich 12                                                                          | DNA binding                                   | -                     | DNA binding protein                 | Biological process unknown                                                   | AT_hook                         | No                       |
| PNPLA4      | 8228    | patatin-like phospholipase domain-containing protein 4 isoform 1 precursor        | NP_004641.1       | 2          | 2                 | 2          | 6      | 0.92                                                     | 1.58                                                     | 58.54                                                                                  | 13.52                                                                                  | 117.1                                                                                         | 38.4                                                                                          | 3                                                                              | 3                                                                              | 2112    | 8228           | patatin-like phospholipase domain containing 4                                           | Molecular function unknown                    | -                     | Unclassified                        | Biological process unknown                                                   | -                               | Yes                      |
| UBE4A       | 9354    | ubiquitin conjugation factor E4 A isoform 1                                       | NP_004779.2       | 2          | 4                 | 4          | 8      | 0.92                                                     | 1.5                                                      | 5.82                                                                                   | 11.3                                                                                   | 9.3                                                                                           | 29.9                                                                                          | 3                                                                              | 3                                                                              | 6793    | 9354           | ubiquitination factor E4A (UFD2 homolog, yeast)                                          | Ubiquitin-specific protease activity          | -                     | Ubiquitin proteasome system protein | Protein metabolism                                                           | UBOX                            | Yes                      |
| MRPS25      | 64432   | 28S ribosomal protein S25, mitochondrial                                          | NP_071942.1       | 1          | 3                 | 3          | 6      | 0.92                                                     | 1.49                                                     | 7.77                                                                                   | 6.26                                                                                   | 12.4                                                                                          | 16.2                                                                                          | 3                                                                              | 3                                                                              | 17594   | 64432          | mitochondrial ribosomal protein S25                                                      | Structural constituent of ribosome            | Mitochondrion         | Ribosomal subunit                   | Protein metabolism                                                           | CC                              | Yes                      |
| SDHB        | 6390    | succinate dehydrogenase [ubiquinone] iron-sulfur subunit, mitochondrial precursor | NP_002991.2       | 1          | 11                | 11         | 34     | 0.92                                                     | 1.4                                                      | 2.37                                                                                   | 2.09                                                                                   | 8.7                                                                                           | 11.8                                                                                          | 16                                                                             | 16                                                                             | 1707    | 6390           | succinate dehydrogenase complex, subunit B, iron-sulfur (lp)                             | Catalytic activity                            | Mitochondrion         | Enzyme: Dehydrogenase               | Metabolism;Energy pathways                                                   | SP                              | Yes                      |
| OARD1       | 221443  | O-acetyl-ADP-ribose deacetylase 1                                                 | NP_659500.1       | 1          | 1                 | 1          | 2      | 0.92                                                     | 1.34                                                     |                                                                                        |                                                                                        |                                                                                               |                                                                                               | 1                                                                              | 1                                                                              |         |                |                                                                                          |                                               |                       |                                     |                                                                              |                                 |                          |
| PPM1B       | 5495    | protein phosphatase 1B isoform 1                                                  | NP_002697.1       | 4          | 1                 | 3          | 4      | 0.92                                                     | 1.29                                                     |                                                                                        |                                                                                        |                                                                                               |                                                                                               | 1                                                                              | 1                                                                              | 4796    | 5495           | protein phosphatase 1B (formerly 2C),magnesium-dependent, beta isoform                   | Protein serine/threonine phosphatase activity | Cytoplasm             | Serine/threonine phosphatase        | Signal transduction                                                          | PP2C                            | Yes                      |
| PWP1        | 11137   | periodic tryptophan protein 1 homolog                                             | NP_008993.1       | 1          | 5                 | 5          | 9      | 0.92                                                     | 1.27                                                     | 12.69                                                                                  | 2.7                                                                                    | 29.1                                                                                          | 8.4                                                                                           | 6                                                                              | 6                                                                              | 11464   | 11137          | PWP1 homolog (S. cerevisiae)                                                             | Transcription regulator activity              | Nucleus               | Transcription regulatory protein    | Cell growth and/or maintenance                                               | CC;WD40                         | No                       |
| CCT4        | 10575   | T-complex protein 1 subunit delta isoform a                                       | NP_006421.2       | 2          | 32                | 33         | 193    | 0.92                                                     | 1.24                                                     | 3.21                                                                                   | 4.47                                                                                   | 28                                                                                            | 55.2                                                                                          | 86                                                                             | 86                                                                             | 5506    | 10575          | chaperonin containing TCP1, subunit 4 (delta)                                            | Chaperone activity                            | Cytoplasm             | Chaperone                           | Protein metabolism                                                           | -                               | Yes                      |
| PSMB8       | 5696    | proteasome subunit beta type-8 isoform E2,proprotein                              | NP_683720.2       | 2          | 5                 | 5          | 7      | 0.92                                                     | 1.19                                                     | 22.71                                                                                  | 15.44                                                                                  | 49.1                                                                                          | 43.1                                                                                          | 5                                                                              | 5                                                                              | 1515    | 5696           | proteasome (prosome, macropain) subunit, beta type, 8 (large multifunctional protease 7) | Ubiquitin-specific protease activity          | Cytoplasm             | Ubiquitin proteasome system protein | Protein metabolism                                                           | -                               | Yes                      |
| INTS10      | 55174   | integrator complex subunit 10                                                     | NP_060612.2       | 1          | 2                 | 2          | 4      | 0.92                                                     | 1.17                                                     |                                                                                        |                                                                                        |                                                                                               |                                                                                               | 1                                                                              | 1                                                                              | 7686    | 55174          | None                                                                                     | Molecular function unknown                    | Nucleus               | Unclassified                        | Biological process unknown                                                   | -                               | No                       |
| NARS        | 4677    | asparagine-tRNA ligase, cytoplasmic                                               | NP_004530.1       | 1          | 14                | 14         | 46     | 0.92                                                     | 1.16                                                     | 4.55                                                                                   | 9.06                                                                                   | 20.8                                                                                          | 55                                                                                            | 24                                                                             | 24                                                                             | 154     | 4677           | asparaginyl-tRNA synthetase                                                              | Ligase activity                               | Cytoplasm             | Enzyme: Ligase                      | Protein metabolism                                                           | TRNA;ACC                        | Yes                      |
| TOR1AIP2    | 163590  | torin-1A-interacting protein 2 isoform b                                          | NP_659471.1       | 1          | 7                 | 8          | 23     | 0.92                                                     | 1.14                                                     | 19.13                                                                                  | 10.58                                                                                  | 57                                                                                            | 32.9                                                                                          | 9                                                                              | 7                                                                              | 10048   | 163590         | torin A interacting protein 2                                                            | Molecular function unknown                    | Endoplasmic reticulum | Unclassified                        | Biological process unknown                                                   | TM                              | No                       |
| SRSF9       | 8683    | serine/arginine-rich splicing factor 9                                            | NP_003760.1       | 1          | 3                 | 3          | 5      | 0.92                                                     | 1.13                                                     | 31.85                                                                                  | 3.59                                                                                   | 54.4                                                                                          | 7                                                                                             | 3                                                                              | 3                                                                              |         |                |                                                                                          |                                               |                       |                                     |                                                                              |                                 |                          |
| LDLR        | 3949    | low-density lipoprotein receptor isoform 1 precursor                              | NP_000518.1       | 9          | 15                | 15         | 39     | 0.92                                                     | 1.11                                                     | 5.8                                                                                    | 6.64                                                                                   | 24.2                                                                                          | 33.9                                                                                          | 20                                                                             | 20                                                                             | 6091    | 3949           | low density lipoprotein receptor (familial hypercholesterolemia)                         | Receptor activity                             | Plasma membrane       | Cell surface receptor               | Cell communication;Signal transduction                                       | LDL;EGF;EGF CA;LDLR;EGF L;TM;SP | Yes                      |
| BLMH        | 642     | bleomycin hydrolase                                                               | NP_000377.1       | 1          | 6                 | 6          | 12     | 0.92                                                     | 1.1                                                      | 5.88                                                                                   | 2.87                                                                                   | 14.4                                                                                          | 8.3                                                                                           | 7                                                                              | 7                                                                              | 3870    | 642            | bleomycin hydrolase                                                                      | Hydrolase activity                            | Cytoplasm             | Enzyme: Hydrolase                   | Metabolism;Energy pathways                                                   | -                               | Yes                      |
| AHCTF1      | 25909   | protein ELYS                                                                      | NP_056261.4       | 1          | 13                | 13         | 28     | 0.92                                                     | 1.08                                                     | 10.74                                                                                  | 2.18                                                                                   | 36.7                                                                                          | 8.5                                                                                           | 13                                                                             | 13                                                                             | 9935    | 25909          | None                                                                                     | Transcription factor activity                 | Nucleus               | Transcription factor                | Regulation of nucleobase, nucleoside, nucleotide and nucleic acid metabolism | AT_hook                         | No                       |
| PLRG1       | 5356    | pleiotropic regulator 1 isoform 1                                                 | NP_002660.1       | 2          | 5                 | 5          | 16     | 0.92                                                     | 1.08                                                     | 5.53                                                                                   | 8.09                                                                                   | 12.5                                                                                          | 21.6                                                                                          | 6                                                                              | 6                                                                              | 16181   | 5356           | pleiotropic regulator 1 (PRL1 homolog, Arabidopsis)                                      | Transcription regulator activity              | Nucleus               | Transcription regulatory protein    | Cell communication;Signal transduction                                       | WD40                            | Yes                      |
| SRPK2       | 6733    | SRSF protein kinase 2 isoform a                                                   | NP_872634.1       | 5          | 3                 | 5          | 9      | 0.92                                                     | 1.07                                                     | 0.83                                                                                   | 18.57                                                                                  | 1.3                                                                                           | 35.4                                                                                          | 3                                                                              | 3                                                                              | 4280    | 6733           | SFRS protein kinase 2                                                                    | Protein serine/threonine kinase activity      | Nucleus               | Serine/threonine kinase             | Regulation of gene expression, epigenetic                                    | CC,S,T,Y,Kinase                 | No                       |
| RPL9        | 6133    | 60S ribosomal protein L9                                                          | NP_001020092.1    | 1          | 7                 | 7          | 47     | 0.92                                                     | 1.07                                                     | 1.86                                                                                   | 5.9                                                                                    | 8.2                                                                                           | 31                                                                                            | 23                                                                             | 23                                                                             | 4732    | 6133           | ribosomal protein L9                                                                     | Structural constituent of ribosome            | Ribosome              | Ribosomal subunit                   | Protein metabolism                                                           | -                               | Yes                      |
| CPOX        | 1371    | oxygen-dependent coproporphyrinogen-III oxidase, mitochondrial precursor          | NP_000088.3       | 1          | 8                 | 8          | 14     | 0.92                                                     | 1.06                                                     | 3.64                                                                                   | 5.14                                                                                   | 10.1                                                                                          | 16.4                                                                                          | 9                                                                              | 9                                                                              | 417     | 1371           | coproporphyrinogen oxidase                                                               | Catalytic activity                            | Mitochondrion         | Enzyme: Oxidase                     | Metabolism;Energy pathways                                                   | -                               | Yes                      |
| SNRPA       | 6626    | U1 small nuclear ribonucleoprotein A                                              | NP_004587.1       | 1          | 6                 | 7          | 20     | 0.92                                                     | 1.05                                                     | 13.33                                                                                  | 11.93                                                                                  | 46.6                                                                                          | 47.6                                                                                          | 13                                                                             | 13                                                                             | 1658    | 6626           | small nuclear ribonucleoprotein polypeptide A                                            | RNA binding                                   | Nucleus               | RNA binding protein                 | Regulation of nucleobase, nucleoside, nucleotide and nucleic acid metabolism | RRM                             | Yes                      |
| IMPAD1      | 54928   | inositol monophosphatase 3                                                        | NP_060283.3       | 1          | 4                 | 4          | 6      | 0.92                                                     | 1.05                                                     | 9.11                                                                                   | 2.64                                                                                   | 16.9                                                                                          | 5.6                                                                                           | 4                                                                              | 4                                                                              | 6531    | 54928          | None                                                                                     | Catalytic activity                            | -                     | Enzyme: Phosphatase                 | Metabolism;Energy pathways                                                   | I_Phosphatase;TM                | No                       |
| UBE4B       | 10277   | ubiquitin conjugation factor E4 B isoform 1                                       | NP_001099032.1    | 2          | 4                 | 4          | 7      | 0.92                                                     | 1.05                                                     | 9.47                                                                                   | 9.75                                                                                   | 19.7                                                                                          | 23.2                                                                                          | 5                                                                              | 5                                                                              | 11659   | 10277          | ubiquitination factor E4B (UFD2 homolog, yeast)                                          | Ubiquitin-specific protease activity          | -                     | Ubiquitin proteasome system protein | Protein metabolism                                                           | UBOX                            | Yes                      |
| YARS        | 8565    | tyrosine-tRNA ligase, cytoplasmic                                                 | NP_003671.1       | 1          | 26                | 26         | 61     | 0.92                                                     | 1.04                                                     | 5.6                                                                                    | 5.65                                                                                   | 30.3                                                                                          | 34.9                                                                                          | 33                                                                             | 33                                                                             | 9153    | 8565           | tyrosyl-tRNA synthetase                                                                  | Ligase activity                               | Cytoplasm             | Enzyme: Ligase                      | Metabolism;Energy pathways                                                   | -                               | Yes                      |

Supplementary Table S1. List of quantified proteins in OKF6/TERT1-Smoke cells  
 Raigopaln *et al.*, 2017. Role of protein kinase N2 (PKN2) in cigarette smoke-mediated oncogenic transformation of oral cells

| Gene Symbol | Gene ID | Protein Description                                                  | Protein Accession | # Proteins | # Unique Peptides | # Peptides | # PSMs | OKF6/TERT1-Smoke/<br>OKF6/TERT1-Parental<br>(130/126) R1 | OKF6/TERT1-Smoke/<br>OKF6/TERT1-Parental<br>(128/127) R2 | Ratio Standard Errors [%]:<br>OKF6/TERT1-Smoke/<br>OKF6/TERT1-Parental<br>(130/126) R1 | Ratio Standard Errors [%]:<br>OKF6/TERT1-Smoke/<br>OKF6/TERT1-Parental<br>(128/127) R2 | Ratio Variabilities [%]:<br>F13: OKF6/TERT1-<br>Smoke/<br>OKF6/TERT1-Parental<br>(130/126) R1 | Ratio Variabilities [%]:<br>F13: OKF6/TERT1-<br>Smoke/<br>OKF6/TERT1-Parental<br>(128/127) R2 | Ratio Counts: F13:<br>OKF6/TERT1-Smoke/<br>OKF6/TERT1-Parental<br>(130/126) R1 | Ratio Counts: F13:<br>OKF6/TERT1-Smoke/<br>OKF6/TERT1-Parental<br>(128/127) R2 | HPFD ID | Entrez Gene ID | Gene Name                                                                                                                                                                    | Molecular Function                                          | Primary Localization | Molecular Class                            | Biological Process                                               | Domains                          | Plasma Proteome Database |
|-------------|---------|----------------------------------------------------------------------|-------------------|------------|-------------------|------------|--------|----------------------------------------------------------|----------------------------------------------------------|----------------------------------------------------------------------------------------|----------------------------------------------------------------------------------------|-----------------------------------------------------------------------------------------------|-----------------------------------------------------------------------------------------------|--------------------------------------------------------------------------------|--------------------------------------------------------------------------------|---------|----------------|------------------------------------------------------------------------------------------------------------------------------------------------------------------------------|-------------------------------------------------------------|----------------------|--------------------------------------------|------------------------------------------------------------------|----------------------------------|--------------------------|
| SH3GL1      | 6455    | endophilin-A2 isoform 1                                              | NP_003016.1       | 4          | 10                | 10         | 35     | 0.92                                                     | 1.03                                                     | 3.93                                                                                   | 4.71                                                                                   | 14.5                                                                                          | 19.6                                                                                          | 16                                                                             | 16                                                                             | 3462    | 6455           | SH3-domain GRB2-like 1 (Homo sapiens)Other/Alia ses: HGNC: 10830, CNSA1_EEN, SH3D2B, SH3P8Other Designations: SH3 containingGrb-2-like 1 protein; SH3-containing protein EEN | Molecular function unknown                                  | Cytoplasm            | Unclassified                               | Cell communication;Signal transduction                           | BAR;SH3;CC                       | Yes                      |
| GTF3C3      | 9330    | general transcription factor 3C polypeptide 3 isoform 1              | NP_036218.1       | 2          | 5                 | 5          | 10     | 0.92                                                     | 1.03                                                     | 11.83                                                                                  | 2.02                                                                                   | 24.7                                                                                          | 4.6                                                                                           | 5                                                                              | 5                                                                              | 11997   | 9330           | general transcription factor IIC, polypeptide3, 102kDa                                                                                                                       | Transcription factor activity                               | Nucleus              | Transcription factor                       | Regulation of nucleobase, nucleotide and nucleic acid metabolism | CC;TPR                           | Yes                      |
| LMNB1       | 4001    | lamin-B1 isoform 1                                                   | NP_005564.1       | 2          | 36                | 39         | 138    | 0.92                                                     | 1.02                                                     | 3.18                                                                                   | 3.74                                                                                   | 24.7                                                                                          | 32.6                                                                                          | 69                                                                             | 69                                                                             | 1036    | 4001           | lamin B1                                                                                                                                                                     | Structural molecule activity                                | Nucleus              | Structural protein                         | Cell growth and/or maintenance                                   | CC;NLS                           | Yes                      |
| UTP6        | 55813   | U3 small nuclear RNA-associated protein 6 homolog                    | NP_060898.2       | 1          | 4                 | 4          | 6      | 0.92                                                     | 1.02                                                     | 24.06                                                                                  | 4.53                                                                                   | 46.4                                                                                          | 9.3                                                                                           | 4                                                                              | 4                                                                              | 11020   | 55813          | chromosome 17 open reading frame 40                                                                                                                                          | Molecular function unknown                                  | Nucleolus            | Unclassified                               | Biological process unknown                                       | HAT                              | Yes                      |
| GXYLT1      | 283464  | glucoside xylosyltransferase 1 isoform 1                             | NP_775872.1       | 2          | 1                 | 1          | 2      | 0.92                                                     | 1.02                                                     | 1.02                                                                                   | 1.02                                                                                   | 1.02                                                                                          | 1.02                                                                                          | 1                                                                              | 1                                                                              | 19529   | 283464         | glycosyltransferase 8 domain containing 3                                                                                                                                    | Transferase activity                                        | -                    | Unclassified                               | Biological process unknown                                       | TM                               | No                       |
| PITPNB      | 23760   | phosphatidylinositol transfer protein beta isoform isoform 3         | NP_001271207.1    | 3          | 10                | 10         | 20     | 0.92                                                     | 1.01                                                     | 13.12                                                                                  | 8.99                                                                                   | 43.5                                                                                          | 32.3                                                                                          | 12                                                                             | 12                                                                             | 6044    | 23760          | phosphatidylinositol transfer protein, beta                                                                                                                                  | Transporter activity                                        | Cytoplasm            | Transport/cargo protein                    | Transport                                                        | -                                | Yes                      |
| ACSL4       | 2182    | long-chain-fatty-acid-CoA ligase 4 isoform 2                         | NP_075266.1       | 2          | 12                | 15         | 50     | 0.92                                                     | 1                                                        | 4.83                                                                                   | 12.76                                                                                  | 16.8                                                                                          | 50.5                                                                                          | 14                                                                             | 14                                                                             | 2152    | 2182           | acyl-CoA synthetase long-chain family member 4                                                                                                                               | Ligase activity                                             | Microsome            | Enzyme; Ligase                             | Metabolism;Energy pathways                                       | SP                               | Yes                      |
| VPS35       | 55737   | vacuolar protein sorting-associated protein 35                       | NP_060676.2       | 1          | 20                | 20         | 60     | 0.92                                                     | 0.99                                                     | 3.93                                                                                   | 4.32                                                                                   | 19.7                                                                                          | 23.8                                                                                          | 29                                                                             | 30                                                                             | 6085    | 55737          | vacuolar protein sorting 35 (yeast)                                                                                                                                          | Transporter activity                                        | Cytoplasm            | Transport/cargo protein                    | Transport                                                        | -                                | Yes                      |
| DCD         | 117159  | dermcidin isoform 2 preproprotein                                    | NP_001287783.1    | 2          | 2                 | 2          | 2      | 0.92                                                     | 0.98                                                     | 0.98                                                                                   | 0.98                                                                                   | 0.98                                                                                          | 0.98                                                                                          | 1                                                                              | 1                                                                              | 7363    | 117159         | dermcidin                                                                                                                                                                    | Molecular function unknown                                  | Extracellular        | Secreted polypeptide                       | Immune response                                                  | SP                               | Yes                      |
| SF3B1       | 23451   | splicing factor 3B subunit 1 isoform 1                               | NP_036565.2       | 3          | 34                | 34         | 74     | 0.92                                                     | 0.98                                                     | 4.99                                                                                   | 7.01                                                                                   | 29.7                                                                                          | 45.5                                                                                          | 40                                                                             | 40                                                                             | 9281    | 23451          | splicing factor 3b, subunit 1, 155kDa                                                                                                                                        | Ribonucleoprotein                                           | Nucleus              | RNA binding protein                        | Regulation of nucleobase, nucleotide and nucleic acid metabolism | CC                               | Yes                      |
| ACTR1A      | 10121   | alpha-centractin                                                     | NP_005727.1       | 1          | 5                 | 10         | 47     | 0.92                                                     | 0.98                                                     | 4.6                                                                                    | 5.04                                                                                   | 13.4                                                                                          | 15.7                                                                                          | 10                                                                             | 10                                                                             | 5507    | 10121          | ARPI actin-related protein 1 homolog A,centractin alpha (yeast)                                                                                                              | Structural constituent of cytoskeleton                      | Centrosome           | Cytoskeletal protein                       | Cell growth and/or maintenance                                   | ACTIN                            | Yes                      |
| DUSP11      | 8446    | RNARNP complex-1-interacting phosphatase                             | NP_003575.2       | 1          | 1                 | 1          | 1      | 0.92                                                     | 0.98                                                     | 0.98                                                                                   | 0.98                                                                                   | 0.98                                                                                          | 0.98                                                                                          | 1                                                                              | 1                                                                              | 4368    | 8446           | dual specificity phosphatase 11 (RNARNPcomplex 1-interacting)                                                                                                                | Protein tyrosine/serine/threonine phosphatase activity      | Nucleus              | Dual specificity phosphatase               | Cell communication;Signal transduction                           | DSPC                             | No                       |
| DICER1      | 23405   | endoribonuclease Dicer isoform 1                                     | NP_803187.1       | 4          | 2                 | 2          | 8      | 0.92                                                     | 0.98                                                     | 8.17                                                                                   | 3.74                                                                                   | 10.7                                                                                          | 5.2                                                                                           | 2                                                                              | 2                                                                              | 5875    | 23405          | Dicer1, Dcr-1 homolog (Drosophila)                                                                                                                                           | Ribonuclease activity                                       | Cytoplasm            | Ribonuclease                               | Gene silencing                                                   | DEXDc;HELICc;DSRM;CC             | Yes                      |
| DNAJC11     | 55735   | dnaj homolog subfamily C member 11                                   | NP_060668.2       | 1          | 8                 | 8          | 13     | 0.92                                                     | 0.98                                                     | 4.81                                                                                   | 8.4                                                                                    | 13.3                                                                                          | 25.1                                                                                          | 9                                                                              | 9                                                                              | 7112    | 55735          | DnaJ (Hsp40) homolog subfamily C, member 11                                                                                                                                  | Molecular function unknown                                  | -                    | Unclassified                               | Biological process unknown                                       | DNAJ;NLS;CC                      | No                       |
| MDH1        | 4190    | malate dehydrogenase, cytoplasmic isoform 1                          | NP_001186040.1    | 3          | 17                | 17         | 62     | 0.92                                                     | 0.97                                                     | 3.51                                                                                   | 4.9                                                                                    | 19.4                                                                                          | 28.6                                                                                          | 35                                                                             | 35                                                                             | 1100    | 4190           | malate dehydrogenase 1, NAD (soluble)                                                                                                                                        | Catalytic activity                                          | Cytoplasm            | Enzyme; Dehydrogenase                      | Metabolism;Energy pathways                                       | -                                | Yes                      |
| HBS1L       | 10767   | HBS1-like protein isoform 1                                          | NP_006611.1       | 3          | 7                 | 7          | 12     | 0.92                                                     | 0.97                                                     | 7.88                                                                                   | 7.9                                                                                    | 20.6                                                                                          | 21.9                                                                                          | 8                                                                              | 8                                                                              | 6582    | 10767          | HBS1-like (S. cerevisiae)                                                                                                                                                    | Translation regulator activity                              | Cytoplasm            | Translation regulatory protein             | Protein metabolism                                               | GTP_EFTU;GTP_EFTU_D2;GTP_EFTU_D3 | Yes                      |
| ASAHI       | 427     | acid ceramidase isoform b                                            | NP_004306.3       | 3          | 5                 | 5          | 14     | 0.92                                                     | 0.97                                                     | 7.32                                                                                   | 14.05                                                                                  | 19.1                                                                                          | 40.1                                                                                          | 8                                                                              | 8                                                                              | 1969    | 427            | N-acylsphingosine amidohydrolase (acidceramidase)                                                                                                                            | Hydrolase activity                                          | Lysosome             | Enzyme; Hydrolase                          | Metabolism;Energy pathways                                       | SP                               | Yes                      |
| GBA         | 2629    | glucosylceramidase isoform 1 precursor                               | NP_001005742.1    | 3          | 8                 | 8          | 27     | 0.92                                                     | 0.95                                                     | 8.17                                                                                   | 7                                                                                      | 28.5                                                                                          | 25.3                                                                                          | 14                                                                             | 14                                                                             | 6973    | 2629           | glucosidase, beta, acid (includesglucosylceramidase)                                                                                                                         | Glucosidase activity                                        | Lysosome             | Enzyme; Glucosidase                        | Lipid metabolism                                                 | SP                               | Yes                      |
| TARBP1      | 6894    | probable methyltransferase TARBP1                                    | NP_005637.3       | 1          | 3                 | 3          | 3      | 0.92                                                     | 0.95                                                     | 7.37                                                                                   | 7.69                                                                                   | 9.6                                                                                           | 10.3                                                                                          | 2                                                                              | 2                                                                              | 5445    | 6894           | TAR (HIV) RNA binding protein 1                                                                                                                                              | RNA binding                                                 | Nucleus              | RNA binding protein                        | Regulation of nucleobase, nucleotide and nucleic acid metabolism | -                                | Yes                      |
| MAT2A       | 4144    | S-adenosylmethionine synthase isoform type-2                         | NP_005902.1       | 2          | 13                | 13         | 35     | 0.92                                                     | 0.95                                                     | 4.75                                                                                   | 4.44                                                                                   | 18.1                                                                                          | 17.6                                                                                          | 17                                                                             | 17                                                                             | 3275    | 4144           | methionine adenosyltransferase II, alpha                                                                                                                                     | Catalytic activity                                          | Cytoplasm            | Enzyme; Adenosyltransferase                | Metabolism;Energy pathways                                       | -                                | Yes                      |
| PRKDC       | 5591    | DNA-dependent protein kinase catalytic subunit isoform 1             | NP_008835.5       | 2          | 109               | 109        | 336    | 0.92                                                     | 0.92                                                     | 2.46                                                                                   | 2.84                                                                                   | 29.8                                                                                          | 34.6                                                                                          | 166                                                                            | 166                                                                            | 2941    | 5591           | protein kinase, DNA-activated, catalytic subunit                                                                                                                             | Protein serine/threonine kinase activity;DNA repair protein | Nucleus              | Serine/threonine kinase;DNA repair protein | Cell communication;Signal transduction                           | PI3Kc1;L;HEAT                    | Yes                      |
| PRPSAP2     | 5636    | phosphoribosyl pyrophosphate synthase-associated protein 2 isoform 1 | NP_002758.1       | 4          | 8                 | 11         | 31     | 0.92                                                     | 0.92                                                     | 6.2                                                                                    | 9.79                                                                                   | 21.6                                                                                          | 34.7                                                                                          | 14                                                                             | 14                                                                             | 4789    | 5636           | phosphoribosyl pyrophosphate synthase-associated protein 2                                                                                                                   | Molecular function unknown                                  | Nucleus;Cytoplasm    | Regulatory/other subunit                   | Regulation of nucleobase, nucleotide and nucleic acid metabolism | -                                | No                       |
| RPL14       | 9045    | 60S ribosomal protein L14                                            | NP_003964.3       | 1          | 4                 | 4          | 39     | 0.92                                                     | 0.91                                                     | 4.98                                                                                   | 6.63                                                                                   | 21.2                                                                                          | 28.3                                                                                          | 21                                                                             | 21                                                                             | 10617   | 9045           | ribosomal protein L14                                                                                                                                                        | Structural constituent of ribosome                          | Ribosome             | Ribosomal subunit                          | Protein metabolism                                               | KOW                              | Yes                      |

Supplementary Table S1. List of quantified proteins in OKF6/TERT1-Smoke cells  
 Raingonalan *et al.*, 2017. Role of protein kinase N2 (PKN2) in cigarette smoke-mediated oncogenic transformation of oral cells

| Gene Symbol | Gene ID | Protein Description                                                                  | Protein Accession | # Proteins | # Unique Peptides | # Peptides | # PSMs | OKF6/TERT1-Smoke/<br>OKF6/TERT1-Parental<br>(130/126) R1 | OKF6/TERT1-Smoke/<br>OKF6/TERT1-Parental<br>(128/127) R2 | Ratio Standard Errors [%]:<br>OKF6/TERT1-Smoke/<br>OKF6/TERT1-Parental<br>(130/126) R1 | Ratio Standard Errors [%]:<br>OKF6/TERT1-Smoke/<br>OKF6/TERT1-Parental<br>(128/127) R2 | Ratio Variabilities [%]:<br>F13: OKF6/TERT1-<br>Smoke/<br>OKF6/TERT1-Parental<br>(130/126) R1 | Ratio Variabilities [%]:<br>F13: OKF6/TERT1-<br>Smoke/<br>OKF6/TERT1-Parental<br>(128/127) R2 | Ratio Counts: F13:<br>OKF6/TERT1-Smoke/<br>OKF6/TERT1-Parental<br>(130/126) R1 | Ratio Counts: F13:<br>OKF6/TERT1-Smoke/<br>OKF6/TERT1-Parental<br>(128/127) R2 | HPRD ID | Entrez Gene ID | Gene Name                                                                                                       | Molecular Function                                 | Primary Localization  | Molecular Class                     | Biological Process                                                           | Domains       | Plasma Proteome Database |
|-------------|---------|--------------------------------------------------------------------------------------|-------------------|------------|-------------------|------------|--------|----------------------------------------------------------|----------------------------------------------------------|----------------------------------------------------------------------------------------|----------------------------------------------------------------------------------------|-----------------------------------------------------------------------------------------------|-----------------------------------------------------------------------------------------------|--------------------------------------------------------------------------------|--------------------------------------------------------------------------------|---------|----------------|-----------------------------------------------------------------------------------------------------------------|----------------------------------------------------|-----------------------|-------------------------------------|------------------------------------------------------------------------------|---------------|--------------------------|
| ABCD3       | 5825    | ATP-binding cassette sub-family D member 3 isoform a                                 | NP_002849.1       | 6          | 9                 | 10         | 27     | 0.92                                                     | 0.91                                                     | 5.51                                                                                   | 9.64                                                                                   | 16.2                                                                                          | 29.8                                                                                          | 10                                                                             | 11                                                                             | 1368    | 5825           | ATP-binding cassette, sub-family D (ALD), member 3                                                              | ATP binding                                        | Peroxisome            | Integral membrane protein           | Transport                                                                    | TM,AAA,SP     | Yes                      |
| DYNC1H1     | 1778    | cytoplasmic dynein 1 heavy chain 1                                                   | NP_001367.2       | 5          | 159               | 159        | 478    | 0.92                                                     | 0.91                                                     | 1.71                                                                                   | 2.32                                                                                   | 25.3                                                                                          | 34.3                                                                                          | 250                                                                            | 250                                                                            | 2524    | 1778           | dynein, cytoplasmic, heavy polypeptide 1                                                                        | ATPase activity                                    | Cytoplasm             | ATPase                              | Metabolism;Energy pathways                                                   | CC,AAA        | Yes                      |
| ATPSA1      | 498     | ATP synthase subunit alpha, mitochondrial isoform a precursor                        | NP_004037.1       | 3          | 30                | 30         | 237    | 0.92                                                     | 0.91                                                     | 2.99                                                                                   | 3.09                                                                                   | 29.5                                                                                          | 30.1                                                                                          | 110                                                                            | 110                                                                            | 1258    | 498            | ATP synthase, H <sup>+</sup> -transporting, mitochondrial F1 complex, alpha subunit, isoform 1, cardiac muscle  | Transporter activity                               | Mitochondrion         | Transport/cargo protein             | Metabolism;Energy pathways                                                   | SP            | Yes                      |
| VPS16       | 64601   | vacuolar protein sorting-associated protein 16 homolog isoform 1                     | NP_072097.2       | 2          | 4                 | 4          | 12     | 0.92                                                     | 0.9                                                      | 7.24                                                                                   | 8.36                                                                                   | 16.4                                                                                          | 18.7                                                                                          | 6                                                                              | 6                                                                              | 12259   | 64601          | vacuolar protein sorting 16 (yeast)                                                                             | Transporter activity                               | Late endosome         | Transport/cargo protein             | Transport                                                                    | CC            | Yes                      |
| PEX11B      | 8799    | peroxisomal membrane protein 11B isoform 1                                           | NP_003837.1       | 2          | 3                 | 3          | 4      | 0.92                                                     | 0.9                                                      | 12.69                                                                                  | 12.64                                                                                  | 16.7                                                                                          | 16.3                                                                                          | 2                                                                              | 2                                                                              | 4844    | 8799           | peroxisomal biogenesis factor 11B                                                                               | Molecular function unknown                         | Peroxisome            | Integral membrane protein           | Cell communication;Signal transduction                                       | TPR;TM        | No                       |
| SMC6        | 79677   | structural maintenance of chromosomes protein 6                                      | NP_078900.1       | 1          | 2                 | 2          | 3      | 0.92                                                     | 0.89                                                     |                                                                                        |                                                                                        |                                                                                               |                                                                                               | 1                                                                              | 1                                                                              | 10242   | 79677          | SMC6 structural maintenance of chromosomes6-like 1 (yeast)                                                      | Molecular function unknown                         | Nucleus               | Unclassified                        | Regulation of nucleobase, nucleoside, nucleotide and nucleic acid metabolism | CC,CXC        | No                       |
| LSS         | 4047    | lanosterol synthase isoform 1                                                        | NP_001001438.1    | 3          | 14                | 14         | 34     | 0.92                                                     | 0.89                                                     | 8.78                                                                                   | 5.44                                                                                   | 35.5                                                                                          | 20.7                                                                                          | 18                                                                             | 18                                                                             | 2945    | 4047           | lanosterol synthase (2,3-oxidosqualene-lanosterol cyclase)                                                      | Catalytic activity                                 | Endoplasmic reticulum | Enzyme;Mutase                       | Metabolism;Energy pathways                                                   | -             | Yes                      |
| GNAI2       | 2771    | guanine nucleotide-binding protein G(i) subunit alpha-2 isoform 1                    | NP_002061.1       | 13         | 6                 | 10         | 83     | 0.92                                                     | 0.88                                                     | 5.65                                                                                   | 7.55                                                                                   | 22.8                                                                                          | 29.7                                                                                          | 19                                                                             | 19                                                                             | 764     | 2771           | guanine nucleotide binding protein (G protein), alpha inhibiting activity polypeptide 2                         | GTPase activity;G protein-coupled receptor binding | Plasma membrane       | GTPase;G protein                    | Cell communication;Signal transduction                                       | -             | Yes                      |
| COL1A2      | 1278    | collagen alpha-2(I) chain precursor                                                  | NP_000080.2       | 1          | 2                 | 2          | 3      | 0.92                                                     | 0.88                                                     | 45.17                                                                                  | 49.12                                                                                  | 64.6                                                                                          | 67.4                                                                                          | 2                                                                              | 2                                                                              | 363     | 1278           | collagen, type I, alpha 2                                                                                       | Extracellular matrix structural constituent        | Extracellular         | Extracellular matrix protein        | Cell growth and/or maintenance                                               | COL,FLSP,COLL | Yes                      |
| CDK16       | 5127    | cyclin-dependent kinase 16 isoform 3                                                 | NP_001163931.1    | 48         | 1                 | 2          | 18     | 0.92                                                     | 0.88                                                     |                                                                                        |                                                                                        |                                                                                               |                                                                                               | 1                                                                              | 1                                                                              | 2409    | 5127           | PCTAIRE protein kinase 1                                                                                        | Protein serine/threonine kinase activity           | Cytoplasm             | Serine/threonine kinase             | Cell communication;Signal transduction                                       | S_T_kinase    | Yes                      |
| TSG101      | 7251    | tumor susceptibility gene 101 protein                                                | NP_006283.1       | 1          | 6                 | 6          | 21     | 0.92                                                     | 0.88                                                     | 5.23                                                                                   | 9.47                                                                                   | 17.4                                                                                          | 30.7                                                                                          | 13                                                                             | 13                                                                             | 3229    | 7251           | tumor susceptibility gene 101                                                                                   | Ubiquitin-specific protease activity               | Cytoplasm             | Ubiquitin proteasome system protein | Protein metabolism                                                           | UBC,CC        | Yes                      |
| SPATASL1    | 79029   | spermatogenesis-associated protein 5-like protein 1                                  | NP_076968.2       | 1          | 3                 | 3          | 5      | 0.92                                                     | 0.87                                                     | 9.91                                                                                   | 41.97                                                                                  | 12.9                                                                                          | 55.6                                                                                          | 2                                                                              | 2                                                                              | 11596   | 79029          | spermatogenesis associated 5-like 1                                                                             | Molecular function unknown                         | -                     | Unclassified                        | Biological process                                                           | AAA           | No                       |
| IMMT        | 10989   | MICOS complex subunit MIC60 isoform 1                                                | NP_006830.2       | 3          | 44                | 44         | 121    | 0.92                                                     | 0.87                                                     | 3.13                                                                                   | 3.85                                                                                   | 23.5                                                                                          | 27.6                                                                                          | 65                                                                             | 65                                                                             | 2658    | 10989          | inner membrane protein, mitochondrial (mitofilin)                                                               | Motor activity                                     | Mitochondrion         | Motor protein                       | Cell growth and/or maintenance                                               | SP,CC,TM      | Yes                      |
| PRPF38B     | 55119   | pre-mRNA-splicing factor 38B                                                         | NP_060531.2       | 1          | 2                 | 2          | 4      | 0.92                                                     | 0.86                                                     | 1.09                                                                                   | 8.65                                                                                   | 1.4                                                                                           | 10.6                                                                                          | 2                                                                              | 2                                                                              | 7664    | 55119          | PRPF38 pre-mRNA processing factor 38 (yeast) domain containing B                                                | RNA binding                                        | -                     | RNA binding protein                 | Regulation of nucleobase, nucleoside, nucleotide and nucleic acid metabolism | CC            | No                       |
| PYCR1       | 5831    | pyroline-5-carboxylate reductase 1, mitochondrial isoform 5                          | NP_001269210.1    | 4          | 4                 | 5          | 10     | 0.92                                                     | 0.86                                                     | 13.23                                                                                  | 9.97                                                                                   | 27.9                                                                                          | 19.3                                                                                          | 5                                                                              | 5                                                                              | 1528    | 5831           | pyroline-5-carboxylate reductase 1                                                                              | Oxidoreductase activity                            | Cytoplasm             | Enzyme;Oxidoreductase               | Metabolism;Energy pathways                                                   | -             | Yes                      |
| HIBADH      | 11112   | 3-hydroxyisobutyrate dehydrogenase, mitochondrial precursor                          | NP_689953.1       | 1          | 10                | 10         | 24     | 0.92                                                     | 0.86                                                     | 4.56                                                                                   | 10.47                                                                                  | 14.6                                                                                          | 32.1                                                                                          | 12                                                                             | 12                                                                             | 12238   | 11112          | 3-hydroxyisobutyrate dehydrogenase                                                                              | Catalytic activity                                 | Mitochondrion         | Enzyme;Dehydrogenase                | Metabolism;Energy pathways                                                   | SP            | Yes                      |
| EXOC8       | 149371  | exocyst complex component 8                                                          | NP_787072.2       | 1          | 9                 | 9          | 17     | 0.92                                                     | 0.86                                                     | 10.37                                                                                  | 5.03                                                                                   | 30.9                                                                                          | 13.7                                                                                          | 10                                                                             | 10                                                                             | 9943    | 149371         | exocyst complex component 8                                                                                     | Transporter activity                               | Plasma membrane       | Transport/cargo protein             | Transport                                                                    | PH            | No                       |
| MTPAP       | 55149   | poly(A) RNA polymerase, mitochondrial precursor                                      | NP_060579.3       | 1          | 5                 | 5          | 9      | 0.92                                                     | 0.85                                                     | 11.57                                                                                  | 17.95                                                                                  | 24.2                                                                                          | 35.2                                                                                          | 5                                                                              | 5                                                                              | 15097   | 55149          | PAP associated domain containing 1                                                                              | DNA-directed RNA polymerase activity               | Mitochondrion         | RNA polymerase                      | Regulation of nucleobase, nucleoside, nucleotide and nucleic acid metabolism | -             | No                       |
| GBF1        | 8729    | Golgi-specific brefeldin A-resistance guanine nucleotide exchange factor 1 isoform 1 | NP_004184.1       | 3          | 14                | 15         | 34     | 0.92                                                     | 0.84                                                     | 3.14                                                                                   | 11.54                                                                                  | 11.2                                                                                          | 38.9                                                                                          | 15                                                                             | 15                                                                             | 4740    | 8729           | golgi-specific brefeldin A resistance factor 1                                                                  | Guanyl-nucleotide exchange factor activity         | Golgi apparatus       | Guanine nucleotide exchange factor  | Cell communication;Signal transduction                                       | Sec7          | Yes                      |
| RAB14       | 51552   | ras-related protein Rab-14                                                           | NP_057406.2       | 10         | 14                | 15         | 100    | 0.92                                                     | 0.83                                                     | 4.88                                                                                   | 6.43                                                                                   | 26.2                                                                                          | 31.3                                                                                          | 33                                                                             | 33                                                                             | 6693    | 51552          | RAB14, member RAS oncogene family                                                                               | GTPase activity                                    | Integral to membrane  | GTPase                              | Cell communication;Signal transduction                                       | RAB           | Yes                      |
| PDS5B       | 23047   | sister chromatid cohesion protein PDS5 homolog B                                     | NP_055847.1       | 1          | 8                 | 9          | 21     | 0.92                                                     | 0.83                                                     | 7.07                                                                                   | 4.64                                                                                   | 19.7                                                                                          | 11.7                                                                                          | 9                                                                              | 9                                                                              | 5624    | 23047          | androgen-induced proliferation inhibitor                                                                        | Transcription factor activity                      | Nucleus               | Transcription factor                | Regulation of nucleobase, nucleoside, nucleotide and nucleic acid metabolism | AT_hook       | No                       |
| FDPS        | 2224    | farnesyl pyrophosphate synthase isoform a                                            | NP_001995.1       | 3          | 9                 | 9          | 35     | 0.92                                                     | 0.83                                                     | 4.88                                                                                   | 14.09                                                                                  | 19.9                                                                                          | 54.6                                                                                          | 19                                                                             | 19                                                                             | 606     | 2224           | farnesyl diphosphate synthase (farnesylpyrophosphate synthetase, dimethylallyltransferase, geranyl transferase) | Transferase activity                               | Peroxisome            | Enzyme;Prenyltransferase            | Metabolism;Energy pathways                                                   | 3EXO,SP,TM    | Yes                      |
| VAMP3       | 9341    | vesicle-associated membrane protein 3 (cellubrevin)                                  | NP_004772.1       | 2          | 4                 | 4          | 16     | 0.92                                                     | 0.82                                                     | 4.9                                                                                    | 22.34                                                                                  | 11                                                                                            | 47.3                                                                                          | 6                                                                              | 6                                                                              | 4711    | 9341           | vesicle-associated membrane protein 3 (cellubrevin)                                                             | Protein binding;Transporter activity               | Plasma membrane       | Integral membrane protein           | Transport                                                                    | TM,CC         | No                       |

Supplementary Table S1. List of quantified proteins in OKF6/TERT1-Smoke cells  
 Raigopaln *et al.*, 2017. Role of protein kinase N2 (PKN2) in cigarette smoke-mediated oncogenic transformation of oral cells

| Gene Symbol | Gene ID | Protein Description                                           | Protein Accession | # Proteins | # Unique Peptides | # Peptides | # PSMs | OKF6/TERT1-Smoke/<br>OKF6/TERT1-Parental<br>(130/126) R1 | OKF6/TERT1-Smoke/<br>OKF6/TERT1-Parental<br>(128/127) R2 | Ratio Standard Errors [%]:<br>OKF6/TERT1-Smoke/<br>OKF6/TERT1-Parental<br>(130/126) R1 | Ratio Standard Errors [%]:<br>OKF6/TERT1-Smoke/<br>OKF6/TERT1-Parental<br>(128/127) R2 | Ratio Variabilities [%]:<br>F13: OKF6/TERT1-<br>Smoke/<br>OKF6/TERT1-Parental<br>(130/126) R1 | Ratio Variabilities [%]:<br>F13: OKF6/TERT1-<br>Smoke/<br>OKF6/TERT1-Parental<br>(128/127) R2 | Ratio Counts: F13:<br>OKF6/TERT1-Smoke/<br>OKF6/TERT1-Parental<br>(130/126) R1 | Ratio Counts: F13:<br>OKF6/TERT1-Smoke/<br>OKF6/TERT1-Parental<br>(128/127) R2 | HPRD ID | Entrez Gene Id | Gene Name                                                                | Molecular Function                            | Primary Localization  | Molecular Class                  | Biological Process                                                           | Domains               | Plasma Proteome Database |
|-------------|---------|---------------------------------------------------------------|-------------------|------------|-------------------|------------|--------|----------------------------------------------------------|----------------------------------------------------------|----------------------------------------------------------------------------------------|----------------------------------------------------------------------------------------|-----------------------------------------------------------------------------------------------|-----------------------------------------------------------------------------------------------|--------------------------------------------------------------------------------|--------------------------------------------------------------------------------|---------|----------------|--------------------------------------------------------------------------|-----------------------------------------------|-----------------------|----------------------------------|------------------------------------------------------------------------------|-----------------------|--------------------------|
| FAF2        | 23197   | FAS-associated factor 2                                       | NP_055428.1       | 1          | 13                | 13         | 37     | 0.92                                                     | 0.82                                                     | 9.86                                                                                   | 9.24                                                                                   | 43.2                                                                                          | 35.7                                                                                          | 21                                                                             | 21                                                                             | 16870   | 23197          | None                                                                     | Molecular function unknown                    | Cytoplasm             | Unclassified                     | Apoptosis                                                                    | CC;UBX;UBA            | No                       |
| FLYWCH2     | 114984  | FLYWCH family member 2                                        | NP_612448.1       | 1          | 2                 | 2          | 3      | 0.92                                                     | 0.82                                                     | 2.12                                                                                   | 14.11                                                                                  | 2.8                                                                                           | 16.5                                                                                          | 2                                                                              | 2                                                                              | 14007   | 114984         | None                                                                     | Molecular function unknown                    | -                     | Unclassified                     | Biological process unknown                                                   | -                     | No                       |
| LYRM7       | 90624   | complex III assembly factor LYRM7 isoform 1                   | NP_859056.2       | 1          | 1                 | 1          | 2      | 0.92                                                     | 0.81                                                     | 2.73                                                                                   | 11.14                                                                                  | 3.5                                                                                           | 12.9                                                                                          | 2                                                                              | 2                                                                              | 14276   | 90624          | None                                                                     | Molecular function unknown                    | -                     | Unclassified                     | Biological process unknown                                                   | -                     | No                       |
| MCMBP       | 79892   | mini-chromosome maintenance complex-binding protein isoform 1 | NP_079110.1       | 3          | 6                 | 6          | 11     | 0.92                                                     | 0.81                                                     | 3.5                                                                                    | 5.2                                                                                    | 7.9                                                                                           | 10.4                                                                                          | 6                                                                              | 6                                                                              |         |                |                                                                          |                                               |                       |                                  |                                                                              |                       |                          |
| ELF1        | 1997    | ETS-related transcription factor ELF-1 isoform a              | NP_758961.1       | 2          | 3                 | 3          | 5      | 0.92                                                     | 0.8                                                      | 18.22                                                                                  | 24.83                                                                                  | 24.1                                                                                          | 28.7                                                                                          | 2                                                                              | 2                                                                              | 1808    | 1997           | E74-like factor 1 (ets domain transcription factor)                      | Transcription factor activity                 | Nucleus               | Transcription factor             | Regulation of nucleobase, nucleoside, nucleotide and nucleic acid metabolism | ETS                   | Yes                      |
| TTF2        | 8458    | transcription termination factor 2                            | NP_003585.3       | 1          | 2                 | 2          | 5      | 0.92                                                     | 0.8                                                      | 20.63                                                                                  | 42.39                                                                                  | 27.3                                                                                          | 51                                                                                            | 2                                                                              | 2                                                                              | 5280    | 8458           | transcription termination factor, RNA polymerase I                       | Transcription regulator activity              | Nucleus               | Transcription regulatory protein | Regulation of nucleobase, nucleoside, nucleotide and nucleic acid metabolism | DEXDc;HELIC           | Yes                      |
| IGBP1       | 3476    | immunoglobulin-binding protein 1                              | NP_001542.1       | 1          | 3                 | 3          | 5      | 0.92                                                     | 0.79                                                     | 15.88                                                                                  | 2.45                                                                                   | 25.8                                                                                          | 3.4                                                                                           | 3                                                                              | 3                                                                              | 2140    | 3476           | immunoglobulin (CD79a) binding protein 1                                 | Molecular function unknown                    | Cytoplasm             | Unclassified                     | Cell communication, Signal transduction                                      | CC                    | Yes                      |
| SLC30A5     | 64924   | zinc transporter 5 isoform 1                                  | NP_075053.2       | 1          | 1                 | 1          | 2      | 0.92                                                     | 0.78                                                     |                                                                                        |                                                                                        |                                                                                               |                                                                                               | 1                                                                              | 1                                                                              | 6381    | 64924          | solute carrier family 30 (zinc transporter), member 5                    | Transporter activity                          | Plasma membrane       | Transport/cargo protein          | Transport                                                                    | TM                    | Yes                      |
| NENF        | 29937   | neudisin precursor                                            | NP_037481.1       | 1          | 3                 | 3          | 7      | 0.92                                                     | 0.77                                                     | 6.56                                                                                   | 6.06                                                                                   | 12.1                                                                                          | 9.4                                                                                           | 4                                                                              | 4                                                                              | 11603   | 29937          | None                                                                     | Kinase regulator activity                     | Extracellular         | Secreted polypeptide             | Biological process unknown                                                   | SP                    | Yes                      |
| ADAR        | 103     | double-stranded RNA-specific adenosine deaminase isoform a    | NP_001102.2       | 4          | 35                | 35         | 83     | 0.92                                                     | 0.76                                                     | 3.14                                                                                   | 5.83                                                                                   | 18.5                                                                                          | 28.4                                                                                          | 40                                                                             | 40                                                                             | 7528    | 103            | adenosine deaminase, RNA-specific                                        | Deaminase activity                            | Nucleus               | Enzyme: Deaminase                | Regulation of nucleobase, nucleoside, nucleotide and nucleic acid metabolism | DSRM;NLS              | Yes                      |
| VAMP8       | 8673    | vesicle-associated membrane protein 8                         | NP_003752.2       | 1          | 2                 | 2          | 9      | 0.92                                                     | 0.74                                                     | 3.93                                                                                   | 8.09                                                                                   | 9.6                                                                                           | 16                                                                                            | 7                                                                              | 7                                                                              | 4415    | 8673           | vesicle-associated membrane protein 8 (endobrevin)                       | Auxiliary transport protein activity          | Endosome              | Membrane protein                 | Transport                                                                    | TM                    | No                       |
| DARS2       | 55157   | aspartate--tRNA ligase, mitochondrial                         | NP_060592.2       | 1          | 16                | 16         | 36     | 0.92                                                     | 0.74                                                     | 5.21                                                                                   | 9.72                                                                                   | 21.7                                                                                          | 33                                                                                            | 20                                                                             | 20                                                                             | 7677    | 55157          | None                                                                     | Molecular function unknown                    | Mitochondrion         | Unclassified                     | Biological process unknown                                                   | TRNAA                 | Yes                      |
| CDC42       | 998     | cell division control protein 42 homolog isoform 1 precursor  | NP_001782.1       | 4          | 6                 | 7          | 48     | 0.92                                                     | 0.74                                                     | 3.31                                                                                   | 6.18                                                                                   | 15.3                                                                                          | 23.1                                                                                          | 25                                                                             | 25                                                                             | 309     | 998            | cell division cycle 42 (GTP binding protein, 25kDa)                      | GTPase activity                               | Cytoplasm             | GTPase                           | Cell communication, Signal transduction                                      | RHO                   | Yes                      |
| TPM1        | 7168    | tropomyosin alpha-1 chain isoform Tpm1.3cy                    | NP_00128218.1     | 2          | 2                 | 14         | 32     | 0.92                                                     | 0.66                                                     | 4.23                                                                                   | 51.79                                                                                  | 5.5                                                                                           | 51.6                                                                                          | 2                                                                              | 2                                                                              | 1839    | 7168           | tropomyosin 1 (alpha)                                                    | Cytoskeletal protein binding                  | Actin cytoskeleton    | Cytoskeletal associated protein  | Cell growth and/or maintenance                                               | CC                    | Yes                      |
| MPC2        | 25874   | mitochondrial pyruvate carrier 2                              | NP_056230.1       | 1          | 2                 | 2          | 3      | 0.92                                                     | 0.64                                                     | 0.32                                                                                   | 15.35                                                                                  | 0.4                                                                                           | 14.1                                                                                          | 2                                                                              | 2                                                                              |         |                |                                                                          |                                               |                       |                                  |                                                                              |                       |                          |
| CISD1       | 55847   | CDGSH iron-sulfur domain-containing protein 1                 | NP_060934.1       | 1          | 3                 | 3          | 7      | 0.92                                                     | 0.63                                                     | 12.03                                                                                  | 12.73                                                                                  | 22.4                                                                                          | 16.1                                                                                          | 4                                                                              | 4                                                                              | 12587   | 55847          | chromosome 10 open reading frame 70                                      | Molecular function unknown                    | -                     | Unclassified                     | Biological process unknown                                                   | SP                    | No                       |
| ARL8A       | 127829  | ADP-ribosylation factor-like protein 8A isoform 1             | NP_620150.1       | 2          | 1                 | 4          | 9      | 0.92                                                     | 0.57                                                     |                                                                                        |                                                                                        |                                                                                               |                                                                                               | 1                                                                              | 1                                                                              | 9807    | 127829         | ADP-ribosylation factor-like 10B                                         | GTPase activity                               | -                     | GTPase                           | Cell communication, Signal transduction                                      | ARF                   | Yes                      |
| FTH1        | 2495    | ferritin heavy chain                                          | NP_002023.2       | 1          | 6                 | 6          | 12     | 0.92                                                     | 0.54                                                     | 6.32                                                                                   | 20.72                                                                                  | 14.4                                                                                          | 28.2                                                                                          | 6                                                                              | 6                                                                              | 615     | 2495           | ferritin, heavy polypeptide 1                                            | Storage protein                               | Cytoplasm             | Storage protein                  | Transport                                                                    | -                     | Yes                      |
| COL1A1      | 1277    | collagen alpha-1(I) chain prepropeptide                       | NP_000079.2       | 1          | 1                 | 1          | 11     | 0.92                                                     | 0.52                                                     | 9.01                                                                                   | 23.11                                                                                  | 20.6                                                                                          | 30.3                                                                                          | 6                                                                              | 6                                                                              | 362     | 1277           | collagen, type I, alpha 1                                                | Extracellular matrix structural constituent   | Extracellular         | Extracellular matrix protein     | Cell growth and/or maintenance                                               | VWC;COLL;COL;FLRGD;SP | Yes                      |
| MKRN2       | 23609   | probable E3 ubiquitin-protein ligase makorin-2 isoform 1      | NP_054879.3       | 2          | 1                 | 1          | 1      | 0.91                                                     | 1.75                                                     |                                                                                        |                                                                                        |                                                                                               |                                                                                               | 1                                                                              | 1                                                                              | 9761    | 23609          | makorin, ring finger protein, 2                                          | Ribonucleoprotein                             | -                     | Unclassified                     | Regulation of nucleobase, nucleoside, nucleotide and nucleic acid metabolism | ZnF_C3H1;RING         | No                       |
| SPTLC2      | 9517    | serine palmitoyltransferase 2                                 | NP_004854.1       | 1          | 3                 | 3          | 9      | 0.91                                                     | 1.73                                                     | 12.83                                                                                  | 3.08                                                                                   | 23.6                                                                                          | 10.7                                                                                          | 4                                                                              | 4                                                                              | 5755    | 9517           | serine palmitoyltransferase, long chain base subunit 2                   | Acyltransferase activity                      | Endoplasmic reticulum | Enzyme: Acyltransferase          | Metabolism;Energy pathways                                                   | -                     | Yes                      |
| LIG1        | 3978    | DNA ligase 1 isoform 1                                        | NP_000225.1       | 3          | 1                 | 1          | 2      | 0.91                                                     | 1.62                                                     |                                                                                        |                                                                                        |                                                                                               |                                                                                               | 1                                                                              | 1                                                                              | 534     | 3978           | ligase I, DNA, ATP-dependent                                             | DNA ligase activity                           | Nucleus               | DNA ligase                       | Regulation of nucleobase, nucleoside, nucleotide and nucleic acid metabolism | CC                    | Yes                      |
| SRSF4       | 6429    | serine/arginine-rich splicing factor 4                        | NP_005617.2       | 1          | 6                 | 10         | 23     | 0.91                                                     | 1.42                                                     | 13.97                                                                                  | 23.13                                                                                  | 29.1                                                                                          | 84.7                                                                                          | 5                                                                              | 5                                                                              |         |                |                                                                          |                                               |                       |                                  |                                                                              |                       |                          |
| PPM1A       | 5494    | protein phosphatase 1A isoform 3                              | NP_808821.2       | 5          | 2                 | 3          | 5      | 0.91                                                     | 1.36                                                     | 6.23                                                                                   | 8.66                                                                                   | 8                                                                                             | 16.7                                                                                          | 2                                                                              | 2                                                                              | 16199   | 5494           | protein phosphatase 1A (formerly 2C), magnesium-dependent, alpha isoform | Protein serine/threonine phosphatase activity | Cytoplasm;Nucleus     | Serine/threonine phosphatase     | Signal transduction                                                          | PP2C                  | Yes                      |
| TUBG1       | 7283    | tubulin gamma-1 chain                                         | NP_001061.2       | 2          | 9                 | 9          | 23     | 0.91                                                     | 1.29                                                     | 10.33                                                                                  | 4.77                                                                                   | 31.8                                                                                          | 20.7                                                                                          | 11                                                                             | 11                                                                             | 1853    | 7283           | tubulin, gamma 1                                                         | Structural constituent of cytoskeleton        | Nucleus               | Cytoskeletal protein             | Cell growth and/or maintenance                                               | TUBULIN               | Yes                      |
| RFC5        | 5985    | replication factor C subunit 5 isoform 1                      | NP_031396.1       | 4          | 3                 | 3          | 5      | 0.91                                                     | 1.29                                                     | 20.36                                                                                  | 7.71                                                                                   | 26.6                                                                                          | 14.1                                                                                          | 2                                                                              | 2                                                                              | 2677    | 5985           | replication factor C (activator 1) 5, 36.5kDa                            | DNA binding                                   | Nucleus               | DNA binding protein              | DNA replication                                                              | AAA                   | Yes                      |
| NCBP1       | 4686    | nuclear cap-binding protein subunit 1                         | NP_002477.1       | 1          | 10                | 10         | 22     | 0.91                                                     | 1.28                                                     | 3.12                                                                                   | 7.32                                                                                   | 9.4                                                                                           | 31.9                                                                                          | 11                                                                             | 11                                                                             | 2717    | 4686           | nuclear cap binding protein subunit 1, 80kDa                             | RNA binding                                   | Nucleus               | RNA binding protein              | Regulation of nucleobase, nucleoside, nucleotide and nucleic acid metabolism | MF4G;CC;NLS           | Yes                      |

Supplementary Table S1. List of quantified proteins in OKF6/TERT1-Smoke cells

Rajagopalan *et al.*, 2017. Role of protein kinase N2 (PKN2) in cigarette smoke-mediated oncogenic transformation of oral cells

| Gene Symbol | Gene ID | Protein Description                                            | Protein Accession | # Proteins | # Unique Peptides | # Peptides | # PSMs | OKF6/TERT1-Smoke/<br>OKF6/TERT1-Parental<br>(130/126) R1 | OKF6/TERT1-Smoke/<br>OKF6/TERT1-Parental<br>(128/127) R2 | Ratio Standard Errors [%]:<br>OKF6/TERT1-Smoke/<br>OKF6/TERT1-Parental<br>(130/126) R1 | Ratio Standard Errors [%]:<br>OKF6/TERT1-Smoke/<br>OKF6/TERT1-Parental<br>(128/127) R2 | Ratio Variabilities [%]:<br>F13: OKF6/TERT1-<br>Smoke/<br>OKF6/TERT1-Parental<br>(130/126) R1 | Ratio Variabilities [%]:<br>F13: OKF6/TERT1-<br>Smoke/<br>OKF6/TERT1-Parental<br>(128/127) R2 | Ratio Counts: F13:<br>OKF6/TERT1-Smoke/<br>OKF6/TERT1-Parental<br>(130/126) R1 | Ratio Counts: F13:<br>OKF6/TERT1-Smoke/<br>OKF6/TERT1-Parental<br>(128/127) R2 | HPRD ID | Entrez Gene ID | Gene Name                                                                                      | Molecular Function                            | Primary Localization   | Molecular Class                  | Biological Process                                                | Domains    | Plasma Proteome Database |
|-------------|---------|----------------------------------------------------------------|-------------------|------------|-------------------|------------|--------|----------------------------------------------------------|----------------------------------------------------------|----------------------------------------------------------------------------------------|----------------------------------------------------------------------------------------|-----------------------------------------------------------------------------------------------|-----------------------------------------------------------------------------------------------|--------------------------------------------------------------------------------|--------------------------------------------------------------------------------|---------|----------------|------------------------------------------------------------------------------------------------|-----------------------------------------------|------------------------|----------------------------------|-------------------------------------------------------------------|------------|--------------------------|
| TOP2B       | 7155    | DNA topoisomerase 2-beta                                       | NP_001059.2       | 1          | 7                 | 15         | 36     | 0.91                                                     | 1.27                                                     | 4.51                                                                                   | 3.99                                                                                   | 12.4                                                                                          | 15.3                                                                                          | 9                                                                              | 9                                                                              | 537     | 7155           | topoisomerase (DNA) II beta 180kDa                                                             | DNA topoisomerase activity                    | Nucleus                | Enzyme: Topoisomerase            | Regulation of nucleobase, nucleotide, and nucleic acid metabolism | NES        | Yes                      |
| KIAA0020    | 9933    | pumilio domain-containing protein KIAA0020                     | NP_055693.4       | 1          | 4                 | 4          | 7      | 0.91                                                     | 1.27                                                     | 13.61                                                                                  | 9.5                                                                                    | 25                                                                                            | 24.5                                                                                          | 4                                                                              | 4                                                                              | 8822    | 9933           | KIAA0020                                                                                       | RNA binding                                   | Nucleus                | RNA binding protein              | Regulation of nucleobase, nucleotide, and nucleic acid metabolism | Pumilio    | Yes                      |
| EIF3M       | 10480   | eukaryotic translation initiation factor 3 subunit M isoform 1 | NP_006351.2       | 2          | 7                 | 7          | 25     | 0.91                                                     | 1.24                                                     | 7.28                                                                                   | 4.86                                                                                   | 24.1                                                                                          | 21.9                                                                                          | 13                                                                             | 13                                                                             | 9969    | 10480          | None                                                                                           | Molecular function unknown                    | -                      | Unclassified                     | Biological process unknown                                        | PINT       | Yes                      |
| MRS2        | 57380   | magnesium transporter MRS2 homolog, mitochondrial isoform a    | NP_001273193.1    | 4          | 2                 | 2          | 4      | 0.91                                                     | 1.19                                                     | 16.14                                                                                  | 2.99                                                                                   | 20.9                                                                                          | 5                                                                                             | 2                                                                              | 2                                                                              | 17603   | 57380          | MRS2-like, magnesium homeostasis factor (S.cerevisiae)                                         | Transporter activity                          | Mitochondrion          | Integral membrane protein        | Transport                                                         | TM         | Yes                      |
| MYBBP1A     | 10514   | myb-binding protein 1A isoform 1                               | NP_001099008.1    | 2          | 26                | 26         | 70     | 0.91                                                     | 1.19                                                     | 5.83                                                                                   | 9.13                                                                                   | 32.8                                                                                          | 72.4                                                                                          | 36                                                                             | 36                                                                             | 5349    | 10514          | MYB binding protein (P16) 1a                                                                   | Transcription regulator activity              | Nucleolus              | Transcription regulatory protein | Regulation of nucleobase, nucleotide, and nucleic acid metabolism | -          | Yes                      |
| DENR        | 8562    | density-regulated protein                                      | NP_003668.2       | 1          | 6                 | 6          | 12     | 0.91                                                     | 1.18                                                     | 5.01                                                                                   | 12.32                                                                                  | 12.9                                                                                          | 42.9                                                                                          | 8                                                                              | 8                                                                              | 5182    | 8562           | density-regulated protein                                                                      | Molecular function unknown                    | Nucleus                | Unclassified                     | Cell communication;Signal transduction                            | -          | Yes                      |
| BDH1        | 622     | D-beta-hydroxybutyrate dehydrogenase, mitochondrial precursor  | NP_976060.1       | 1          | 4                 | 4          | 6      | 0.91                                                     | 1.17                                                     | 12.73                                                                                  | 9.89                                                                                   | 20.4                                                                                          | 20.3                                                                                          | 3                                                                              | 3                                                                              | 4344    | 622            | 3-hydroxybutyrate dehydrogenase (heart, mitochondrial)                                         | Catalytic activity                            | Mitochondrial membrane | Enzyme: Dehydrogenase            | Fatty acid metabolism                                             | SP         | Yes                      |
| ERO1L       | 30001   | ERO1-like protein alpha precursor                              | NP_055399.1       | 1          | 20                | 21         | 77     | 0.91                                                     | 1.17                                                     | 4.51                                                                                   | 2.7                                                                                    | 26.1                                                                                          | 20                                                                                            | 39                                                                             | 39                                                                             | 13278   | 30001          | ERO1-like (S.cerevisiae)                                                                       | Oxidoreductase activity                       | Endoplasmic reticulum  | Enzyme: Oxidoreductase           | Metabolism;Energy pathways                                        | -          | Yes                      |
| DAGLB       | 221955  | sn1-specific diacylglycerol lipase beta isoform 1              | NP_631918.3       | 2          | 3                 | 3          | 4      | 0.91                                                     | 1.16                                                     | 13.17                                                                                  | 44.55                                                                                  | 21                                                                                            | 84.3                                                                                          | 3                                                                              | 2                                                                              | 17324   | 221955         | None                                                                                           | Lipase activity                               | -                      | Enzyme: Lipase                   | Metabolism;Energy pathways                                        | TM         | No                       |
| NUP54       | 53371   | nucleoporin p54 isoform 1                                      | NP_059122.2       | 2          | 5                 | 5          | 12     | 0.91                                                     | 1.15                                                     | 9.11                                                                                   | 5.95                                                                                   | 20.6                                                                                          | 16.9                                                                                          | 6                                                                              | 6                                                                              | 6352    | 53371          | nucleoporin 54kDa                                                                              | Transporter activity                          | Nucleus                | Transport/cargo protein          | Transport                                                         | -          | Yes                      |
| ZMPSTE24    | 10269   | CAAX prenyl protease 1 homolog                                 | NP_005848.2       | 1          | 10                | 10         | 22     | 0.91                                                     | 1.14                                                     | 9.68                                                                                   | 25.13                                                                                  | 32.5                                                                                          | 138                                                                                           | 13                                                                             | 13                                                                             | 7349    | 10269          | zinc metallopeptidase (STE24 homolog, yeast)                                                   | Metalloproteinase activity                    | Endoplasmic reticulum  | Metallo protease                 | Protein metabolism                                                | TM         | No                       |
| OSTC        | 58505   | oligosaccharyltransferase complex subunit OSTC isoform 3       | NP_001254747.1    | 3          | 1                 | 1          | 2      | 0.91                                                     | 1.12                                                     | 1.12                                                                                   |                                                                                        |                                                                                               |                                                                                               | 1                                                                              | 1                                                                              | 13120   | 58505          | None                                                                                           | Molecular function unknown                    | Integral to membrane   | Integral membrane protein        | Biological process unknown                                        | TM         | No                       |
| WDR5        | 11091   | WD repeat-containing protein 5                                 | NP_060058.1       | 1          | 4                 | 4          | 12     | 0.91                                                     | 1.1                                                      | 4.27                                                                                   | 0.68                                                                                   | 9.5                                                                                           | 1.9                                                                                           | 6                                                                              | 6                                                                              | 10614   | 11091          | WD repeat domain 5                                                                             | Histone binding                               | Cytoplasm              | Cell cycle control protein       | Cell growth and/or maintenance                                    | WD40       | Yes                      |
| CAMSAP3     | 57662   | calmodulin-regulated spectrin-associated protein 3 isoform 1   | NP_001073898.1    | 2          | 2                 | 2          | 3      | 0.91                                                     | 1.1                                                      | 1.1                                                                                    |                                                                                        |                                                                                               |                                                                                               | 1                                                                              | 1                                                                              |         |                |                                                                                                |                                               |                        |                                  |                                                                   |            |                          |
| PSPH        | 5723    | phosphoserine phosphatase                                      | NP_004568.2       | 1          | 2                 | 2          | 3      | 0.91                                                     | 1.1                                                      | 6.59                                                                                   | 21.2                                                                                   | 8.5                                                                                           | 33.9                                                                                          | 2                                                                              | 2                                                                              | 1406    | 5723           | phosphoserine phosphatase                                                                      | Protein serine/threonine phosphatase activity | Cytoplasm              | Serine/threonine phosphatase     | Metabolism;Energy pathways                                        | -          | Yes                      |
| DNAJB11     | 51726   | dnaJ homolog subfamily B member 11 precursor                   | NP_057390.1       | 1          | 5                 | 5          | 14     | 0.91                                                     | 1.07                                                     | 6.67                                                                                   | 4.17                                                                                   | 14.9                                                                                          | 11                                                                                            | 6                                                                              | 6                                                                              | 7485    | 51726          | DnaJ (Hsp40) homolog, subfamily B, member 11                                                   | Chaperone activity                            | Endoplasmic reticulum  | Chaperone                        | Protein metabolism                                                | DNAJ,SP    | Yes                      |
| PPCS        | 79717   | phosphopantothenate--cysteine ligase isoform a                 | NP_078940.2       | 4          | 6                 | 6          | 10     | 0.91                                                     | 1.07                                                     | 11.22                                                                                  | 10.09                                                                                  | 23.1                                                                                          | 24.6                                                                                          | 5                                                                              | 5                                                                              | 7760    | 79717          | None                                                                                           | Ligase activity                               | -                      | Enzyme: Synthase                 | Metabolism                                                        | -          | Yes                      |
| OXR1        | 9943    | serine/threonine-protein kinase OXR1                           | NP_005100.1       | 1          | 11                | 12         | 39     | 0.91                                                     | 1.07                                                     | 7.17                                                                                   | 6.71                                                                                   | 29.1                                                                                          | 32.2                                                                                          | 19                                                                             | 19                                                                             | 6809    | 9943           | oxidative-stress responsive 1                                                                  | Protein serine/threonine kinase activity      | Cytoplasm              | Serine/threonine kinase          | Cell communication;Signal transduction                            | S_T_kinase | No                       |
| GALNT2      | 2590    | polypeptide N-acetylgalactosaminyltransferase 2 precursor      | NP_004472.1       | 6          | 17                | 17         | 35     | 0.91                                                     | 1.07                                                     | 8.44                                                                                   | 5.23                                                                                   | 32.6                                                                                          | 23.4                                                                                          | 17                                                                             | 17                                                                             | 3782    | 2590           | UDP-N-acetyl-alpha-D-galactosamine:polypeptide-N-acetylgalactosaminyltransferase 2 (GalNAc-T2) | Galactosyltransferase activity                | Golgi apparatus        | Enzyme: Galactosyltransferase    | Metabolism;Energy pathways                                        | TM         | Yes                      |
| MRPS14      | 63931   | 28S ribosomal protein S14, mitochondrial                       | NP_071383.1       | 1          | 1                 | 1          | 10     | 0.91                                                     | 1.07                                                     | 14.43                                                                                  | 10.86                                                                                  | 30                                                                                            | 26.5                                                                                          | 5                                                                              | 5                                                                              | 14777   | 63931          | mitochondrial ribosomal protein S14                                                            | Structural constituent of ribosome            | Mitochondrion          | Ribosomal subunit                | Protein metabolism                                                | -          | Yes                      |
| ACAD9       | 28976   | acyl-CoA dehydrogenase family member 9, mitochondrial          | NP_054768.2       | 1          | 10                | 10         | 27     | 0.91                                                     | 1.07                                                     | 6.2                                                                                    | 8.51                                                                                   | 21.4                                                                                          | 35.1                                                                                          | 14                                                                             | 14                                                                             | 12412   | 28976          | acyl-Coenzyme A dehydrogenase family, member 9                                                 | Catalytic activity                            | Mitochondrion          | Enzyme: Dehydrogenase            | Metabolism;Energy pathways                                        | SP         | Yes                      |
| Sep-11      | 55752   | serpin-11 isoform 1                                            | NP_001293076.1    | 3          | 6                 | 8          | 51     | 0.91                                                     | 1.06                                                     | 11.16                                                                                  | 16.18                                                                                  | 25.3                                                                                          | 44.2                                                                                          | 6                                                                              | 6                                                                              |         |                |                                                                                                |                                               |                        |                                  |                                                                   |            |                          |
| NUP188      | 23511   | nucleoporin NUP188 homolog                                     | NP_056169.1       | 3          | 6                 | 6          | 20     | 0.91                                                     | 1.06                                                     | 3.47                                                                                   | 7.85                                                                                   | 7.8                                                                                           | 20.6                                                                                          | 6                                                                              | 6                                                                              | 18582   | 23511          | nucleoporin 188kDa                                                                             | Molecular function unknown                    | Nuclear membrane       | Unclassified                     | Biological process unknown                                        | -          | Yes                      |
| ILVBL       | 10994   | acetolactate synthase-like protein                             | NP_006835.2       | 1          | 10                | 10         | 28     | 0.91                                                     | 1.05                                                     | 10.67                                                                                  | 10.22                                                                                  | 34.8                                                                                          | 38.3                                                                                          | 12                                                                             | 12                                                                             | 16152   | 10994          | ilvB (bacterial acetolactate synthase)-like                                                    | Coenzyme binding                              | -                      | Enzyme: Synthase                 | Metabolism;Energy pathways                                        | TM         | No                       |
| CDK5RAP3    | 80279   | CDK5 regulatory subunit associated protein 3 isoform c         | NP_001265126.1    | 11         | 4                 | 5          | 25     | 0.91                                                     | 1.05                                                     | 1.23                                                                                   | 5.6                                                                                    | 2.8                                                                                           | 14.5                                                                                          | 6                                                                              | 6                                                                              | 12190   | 80279          | CDK5 regulatory subunit associated protein 3                                                   | Molecular function unknown                    | -                      | Cell cycle control protein       | Cell communication;Signal transduction;Regulation of cell cycle   | CC         | Yes                      |
| TMED9       | 54732   | transmembrane emp24 domain-containing protein 9 precursor      | NP_059980.2       | 1          | 5                 | 7          | 38     | 0.91                                                     | 1.04                                                     | 6.6                                                                                    | 15.69                                                                                  | 17.2                                                                                          | 48.6                                                                                          | 8                                                                              | 8                                                                              | 9975    | 54732          | transmembrane emp24 protein transport domain-containing 9                                      | Molecular function unknown                    | Endoplasmic reticulum  | Unclassified                     | Biological process unknown                                        | SP,CC,TM   | No                       |
| RPLP0       | 6175    | 60S acidic ribosomal protein P0                                | NP_444505.1       | 1          | 12                | 12         | 87     | 0.91                                                     | 1.03                                                     | 3.23                                                                                   | 4.03                                                                                   | 19.5                                                                                          | 27.9                                                                                          | 43                                                                             | 43                                                                             | 1610    | 6175           | ribosomal protein, large, P0                                                                   | Structural constituent of ribosome            | Ribosome               | Ribosomal subunit                | Protein metabolism                                                | -          | Yes                      |
| FAM175B     | 23172   | BRISC complex subunit Abro1                                    | NP_115558.3       | 1          | 5                 | 5          | 9      | 0.91                                                     | 1.03                                                     | 4.68                                                                                   | 3.21                                                                                   | 9.5                                                                                           | 7.4                                                                                           | 5                                                                              | 5                                                                              | 13783   | 23172          | KIAA0157                                                                                       | Molecular function unknown                    | Cytoplasm              | Unclassified                     | Biological process unknown                                        | CC         | No                       |

Supplementary Table S1. List of quantified proteins in OKF6/TERT1-Smoke cells

Raignanalan *et al.*, 2017. Role of protein kinase N2 (PKN2) in cigarette smoke-mediated oncogenic transformation of oral cells

| Gene Symbol | Gene ID | Protein Description                                                  | Protein Accession | # Proteins | # Unique Peptides | # Peptides | # PSMs | OKF6/TERT1-Smoke/<br>OKF6/TERT1-Parental<br>(130/126) R1 | OKF6/TERT1-Smoke/<br>OKF6/TERT1-Parental<br>(128/127) R2 | Ratio Standard Errors [%]:<br>OKF6/TERT1-Smoke/<br>OKF6/TERT1-Parental<br>(130/126) R1 | Ratio Standard Errors [%]:<br>OKF6/TERT1-Smoke/<br>OKF6/TERT1-Parental<br>(128/127) R2 | Ratio Variabilities [%]:<br>F13: OKF6/TERT1-<br>Smoke/<br>OKF6/TERT1-Parental<br>(130/126) R1 | Ratio Variabilities [%]:<br>F13: OKF6/TERT1-<br>Smoke/<br>OKF6/TERT1-Parental<br>(128/127) R2 | Ratio Counts: F13:<br>OKF6/TERT1-Smoke/<br>OKF6/TERT1-Parental<br>(130/126) R1 | Ratio Counts: F13:<br>OKF6/TERT1-Smoke/<br>OKF6/TERT1-Parental<br>(128/127) R2 | HPRD ID | Entrez Gene Id | Gene Name                                                                                   | Molecular Function                           | Primary Localization      | Molecular Class                                                | Biological Process                                               | Domains             | Plasma Proteome Database |
|-------------|---------|----------------------------------------------------------------------|-------------------|------------|-------------------|------------|--------|----------------------------------------------------------|----------------------------------------------------------|----------------------------------------------------------------------------------------|----------------------------------------------------------------------------------------|-----------------------------------------------------------------------------------------------|-----------------------------------------------------------------------------------------------|--------------------------------------------------------------------------------|--------------------------------------------------------------------------------|---------|----------------|---------------------------------------------------------------------------------------------|----------------------------------------------|---------------------------|----------------------------------------------------------------|------------------------------------------------------------------|---------------------|--------------------------|
| CARM1       | 10498   | histone-arginine methyltransferase CARM1                             | NP_954592.1       | 1          | 8                 | 8          | 12     | 0.91                                                     | 1.02                                                     | 10.48                                                                                  | 7.53                                                                                   | 23.6                                                                                          | 18.9                                                                                          | 6                                                                              | 6                                                                              | 9158    | 10498          | coactivator-associated arginine methyltransferase 1                                         | Methyltransferase activity                   | Nucleus                   | Enzyme: Methyltransferase                                      | Metabolism;Energy pathways                                       | -                   | Yes                      |
| GLG1        | 2734    | Golgi apparatus protein 1 isoform 1 precursor                        | NP_036333.2       | 3          | 18                | 18         | 33     | 0.91                                                     | 1.01                                                     | 6.43                                                                                   | 4.49                                                                                   | 26.5                                                                                          | 20.5                                                                                          | 20                                                                             | 20                                                                             | 2855    | 2734           | golgi apparatus protein 1                                                                   | Receptor binding                             | Golgi apparatus           | Integral membrane protein                                      | Biological process unknown                                       | TM,SP               | No                       |
| CAPN1       | 823     | calpain-1 catalytic subunit                                          | NP_005177.2       | 1          | 27                | 27         | 77     | 0.91                                                     | 1.01                                                     | 2.94                                                                                   | 5.53                                                                                   | 17.9                                                                                          | 38.3                                                                                          | 44                                                                             | 44                                                                             | 253     | 823            | calpain 1, (mu) large subunit                                                               | Cysteine-type peptidase activity             | Cytoplasm                 | Cysteine protease                                              | Protein metabolism                                               | CYSPC;CALPAIN;JBLEF | Yes                      |
| FOSL2       | 2355    | fos-related antigen 2                                                | NP_005244.1       | 1          | 3                 | 3          | 6      | 0.91                                                     | 0.99                                                     | 3.76                                                                                   | 5.36                                                                                   | 5.9                                                                                           | 9.2                                                                                           | 3                                                                              | 3                                                                              | 3343    | 2355           | FOS-like antigen 2                                                                          | Transcription factor activity                | Nucleus                   | Transcription factor                                           | Regulation of nucleobase, nucleotide and nucleic acid metabolism | BRLZ;CC             | Yes                      |
| PRKAA1      | 5562    | 5'-AMP-activated protein kinase catalytic subunit alpha-1 isoform 2  | NP_996790.3       | 3          | 6                 | 6          | 12     | 0.91                                                     | 0.99                                                     | 11.77                                                                                  | 11.04                                                                                  | 28.9                                                                                          | 29.5                                                                                          | 7                                                                              | 7                                                                              | 4115    | 5562           | protein kinase, AMP-activated, alpha 1 catalytic subunit                                    | Protein serine/threonine kinase activity     | Cytoplasm                 | Serine/threonine kinase                                        | Signal transduction                                              | S_T_kinase          | Yes                      |
| CLTC        | 1213    | clathrin heavy chain 1 isoform 2                                     | NP_001275582.1    | 4          | 76                | 76         | 434    | 0.91                                                     | 0.99                                                     | 1.78                                                                                   | 1.99                                                                                   | 23.1                                                                                          | 28.3                                                                                          | 198                                                                            | 198                                                                            | 350     | 1213           | clathrin, heavy polypeptide (Hc)                                                            | Structural molecule activity                 | Cytoplasm                 | Structural protein                                             | Cell growth and/or maintenance                                   | CLH                 | Yes                      |
| PAK1        | 5058    | serine/threonine-protein kinase PAK 1 isoform 2                      | NP_002567.3       | 2          | 1                 | 5          | 11     | 0.91                                                     | 0.97                                                     |                                                                                        |                                                                                        |                                                                                               |                                                                                               | 1                                                                              | 1                                                                              | 3995    | 5058           | p21/Cdc42/Rac1-activated kinase 1 (STE20homolog, yeast)                                     | Protein serine/threonine kinase activity     | Plasma membrane;Cytoplasm | Serine/threonine kinase                                        | Cell communication;Signal transduction                           | PBD,S_T_kinase      | Yes                      |
| FAM134C     | 162427  | protein FAM134C                                                      | NP_835227.1       | 1          | 3                 | 3          | 11     | 0.91                                                     | 0.97                                                     | 41.64                                                                                  | 4.88                                                                                   | 102.4                                                                                         | 10.6                                                                                          | 5                                                                              | 5                                                                              | 14108   | 162427         | None                                                                                        | Molecular function unknown                   | -                         | Integral membrane protein                                      | Biological process unknown                                       | TM                  | No                       |
| PDLIM1      | 9124    | PDZ and LIM domain protein 1                                         | NP_066272.1       | 1          | 17                | 17         | 50     | 0.91                                                     | 0.97                                                     | 6.53                                                                                   | 6.01                                                                                   | 32                                                                                            | 31.5                                                                                          | 28                                                                             | 28                                                                             | 9326    | 9124           | PDZ and LIM domain 1 (elfin)                                                                | Molecular function unknown                   | Cytoplasm                 | Unclassified                                                   | Biological process unknown                                       | PDZ;LIM             | Yes                      |
| STXBP3      | 6814    | syntaxin-binding protein 3                                           | NP_009200.2       | 1          | 8                 | 8          | 19     | 0.91                                                     | 0.97                                                     | 5.45                                                                                   | 11.28                                                                                  | 15.9                                                                                          | 35.6                                                                                          | 10                                                                             | 10                                                                             | 10517   | 6814           | syntaxin binding protein 3                                                                  | Transporter activity                         | Cytoplasmic vesicle       | Transport/cargo protein                                        | Transport                                                        | -                   | Yes                      |
| OTULIN      | 90268   | ubiquitin thioesterase otulin                                        | NP_612357.4       | 1          | 4                 | 4          | 9      | 0.91                                                     | 0.96                                                     | 5.99                                                                                   | 8.95                                                                                   | 12.2                                                                                          | 19.4                                                                                          | 5                                                                              | 5                                                                              |         |                |                                                                                             |                                              |                           |                                                                |                                                                  |                     |                          |
| CDC27       | 996     | cell division cycle protein 27 homolog isoform 1                     | NP_001107563.1    | 4          | 4                 | 4          | 8      | 0.91                                                     | 0.96                                                     | 17.01                                                                                  | 12.22                                                                                  | 31.9                                                                                          | 23.9                                                                                          | 4                                                                              | 4                                                                              | 304     | 996            | cell division cycle 27                                                                      | Protein binding                              | Nucleus                   | Cell cycle control protein                                     | Cell communication;Signal transduction                           | TPR                 | Yes                      |
| SMTN        | 6525    | smoothelin isoform d                                                 | NP_001193946.1    | 5          | 4                 | 4          | 6      | 0.91                                                     | 0.96                                                     | 7.23                                                                                   | 8.46                                                                                   | 11.5                                                                                          | 14.1                                                                                          | 3                                                                              | 3                                                                              | 3675    | 6525           | smoothelin                                                                                  | Cytoskeletal protein binding                 | Cytoplasm                 | Cytoskeletal associated protein                                | Cell growth and/or maintenance                                   | CHCC                | Yes                      |
| GTF3CS      | 9328    | general transcription factor 3C polypeptide 5 isoform 1              | NP_001116295.1    | 3          | 4                 | 4          | 7      | 0.91                                                     | 0.95                                                     | 25.43                                                                                  | 36.17                                                                                  | 41.6                                                                                          | 64.9                                                                                          | 3                                                                              | 3                                                                              | 16077   | 9328           | general transcription factor IIC, polypeptide5, 63kDa                                       | Transcription factor activity                | Nucleus                   | Transcription factor                                           | Regulation of nucleobase, nucleotide and nucleic acid metabolism | -                   | Yes                      |
| C18orf8     | 29919   | uncharacterized protein C18orf8 isoform 1                            | NP_037458.3       | 1          | 1                 | 1          | 2      | 0.91                                                     | 0.95                                                     |                                                                                        |                                                                                        |                                                                                               |                                                                                               | 1                                                                              | 1                                                                              | 12693   | 29919          | chromosome 18 open reading frame 8                                                          | Molecular function unknown                   | Nucleus                   | Unclassified                                                   | Biological process unknown                                       | -                   | Yes                      |
| YWHAE       | 7531    | 14-3-3 protein epsilon                                               | NP_006752.1       | 1          | 19                | 21         | 181    | 0.91                                                     | 0.95                                                     | 4.56                                                                                   | 5.6                                                                                    | 35.8                                                                                          | 46.8                                                                                          | 70                                                                             | 70                                                                             | 5457    | 7531           | tyrosine 3-monooxygenase/tryptophan 5-monooxygenase activation protein, epsilon polypeptide | Receptor signaling complex scaffold activity | Cytoplasm                 | Adapter molecule                                               | Cell communication;Signal transduction                           | -                   | Yes                      |
| CDC23       | 8697    | cell division cycle protein 23 homolog                               | NP_004652.2       | 1          | 4                 | 4          | 8      | 0.91                                                     | 0.94                                                     | 22.84                                                                                  | 13.25                                                                                  | 43.4                                                                                          | 25.3                                                                                          | 4                                                                              | 4                                                                              | 7221    | 8697           | CDC23 (cell division cycle 23, yeast, homolog)                                              | Binding                                      | Nucleus                   | Ubiquitin proteasome system protein;Cell cycle control protein | Cell communication;Signal transduction;Regulation of cell cycle  | TPR                 | Yes                      |
| XPNPEP1     | 7511    | xxa-Pro aminopeptidase 1 isoform 1                                   | NP_065116.3       | 2          | 14                | 14         | 53     | 0.91                                                     | 0.94                                                     | 4.99                                                                                   | 5.05                                                                                   | 24.8                                                                                          | 25.9                                                                                          | 29                                                                             | 29                                                                             | 3899    | 7511           | X-prolyl aminopeptidase (aminopeptidase P) 1, soluble                                       | Aminopeptidase activity                      | Cytoplasm                 | Aminopeptidase                                                 | Protein metabolism                                               | -                   | Yes                      |
| CCNYL1      | 151195  | cyclin-Y-like protein 1 isoform 1                                    | NP_001135772.1    | 2          | 1                 | 1          | 3      | 0.91                                                     | 0.94                                                     |                                                                                        |                                                                                        |                                                                                               |                                                                                               | 1                                                                              | 1                                                                              | 8809    | 151195         | None                                                                                        | Molecular function unknown                   | -                         | Cell cycle control protein                                     | Cell communication;Signal transduction                           | CYCLIN              | No                       |
| PHB2        | 11331   | prohibitin-2 isoform 1                                               | NP_001138303.1    | 2          | 19                | 19         | 72     | 0.91                                                     | 0.93                                                     | 3.6                                                                                    | 4.07                                                                                   | 21.7                                                                                          | 25.6                                                                                          | 43                                                                             | 44                                                                             | 17843   | 11331          | prohibitin 2                                                                                | Transcription regulator activity             | Nucleus                   | Transcription regulatory protein                               | Regulation of nucleobase, nucleotide and nucleic acid metabolism | NLS;CC;PHB          | Yes                      |
| ADSSL1      | 122622  | adenylosuccinate synthetase isozyme 1 isoform 2                      | NP_689541.1       | 2          | 1                 | 3          | 4      | 0.91                                                     | 0.93                                                     |                                                                                        |                                                                                        |                                                                                               |                                                                                               | 1                                                                              | 1                                                                              | 12433   | 122622         | adenylosuccinate synthetase like 1                                                          | Molecular function unknown                   | Cytoplasm                 | Enzyme: Synthase                                               | Metabolism;Energy pathways                                       | SP                  | Yes                      |
| DRG1        | 4733    | developmentally-regulated GTP-binding protein 1                      | NP_004138.1       | 1          | 11                | 11         | 30     | 0.91                                                     | 0.92                                                     | 4.86                                                                                   | 6.2                                                                                    | 16.6                                                                                          | 21.6                                                                                          | 14                                                                             | 14                                                                             | 16034   | 4733           | developmentally regulated GTP binding protein 1                                             | Molecular function unknown                   | Cytoplasm                 | Unclassified                                                   | Cell growth and/or maintenance                                   | -                   | Yes                      |
| RPS9        | 6203    | 40S ribosomal protein S9                                             | NP_001004.2       | 1          | 19                | 19         | 77     | 0.91                                                     | 0.91                                                     | 3.83                                                                                   | 3.13                                                                                   | 23.6                                                                                          | 19.3                                                                                          | 45                                                                             | 45                                                                             | 4696    | 6203           | ribosomal protein S9                                                                        | Structural constituent of ribosome           | Ribosome                  | Ribosomal subunit                                              | Protein metabolism                                               | -                   | Yes                      |
| RPUSD3      | 285367  | RNA pseudouridylylase synthase domain-containing protein 3 isoform 1 | NP_775930.2       | 2          | 1                 | 1          | 1      | 0.91                                                     | 0.9                                                      |                                                                                        |                                                                                        |                                                                                               |                                                                                               | 1                                                                              | 1                                                                              | 14532   | 285367         | RNA pseudouridylylase synthase domain-containing3                                           | Molecular function unknown                   | -                         | Unclassified                                                   | Biological process unknown                                       | -                   | No                       |
| SCARB2      | 950     | lysosome membrane protein 2 isoform 1 precursor                      | NP_005497.1       | 2          | 5                 | 5          | 12     | 0.91                                                     | 0.89                                                     | 13.75                                                                                  | 9.24                                                                                   | 36.5                                                                                          | 23.6                                                                                          | 8                                                                              | 8                                                                              | 3772    | 950            | scavenger receptor class B, member 2                                                        | Receptor activity                            | Plasma membrane           | Cell surface receptor                                          | Cell communication;Signal transduction                           | TM,SP               | Yes                      |
| ANKFY1      | 51479   | ankyrin-5 isoform 3                                                  | NP_001244928.1    | 2          | 14                | 14         | 31     | 0.91                                                     | 0.88                                                     | 10.26                                                                                  | 4.59                                                                                   | 37.5                                                                                          | 15.8                                                                                          | 15                                                                             | 15                                                                             | 9717    | 51479          | ankyrin repeat and FYVE domain containing 1                                                 | Transporter activity                         | Cytoplasm                 | Transport/cargo protein                                        | Transport                                                        | BTB;CC;ANKFYVE      | Yes                      |
| ACOT9       | 23597   | acyl-coenzyme A thioesterase 9, mitochondrial isoform a precursor    | NP_001032248.1    | 2          | 20                | 20         | 51     | 0.91                                                     | 0.88                                                     | 3.66                                                                                   | 7.66                                                                                   | 17.9                                                                                          | 37                                                                                            | 28                                                                             | 28                                                                             | 6438    | 23597          | None                                                                                        | Hydrolase activity                           | Mitochondrion             | Enzyme: Esterase                                               | Metabolism                                                       | -                   | Yes                      |
| CORO2A      | 7464    | coronin-2A                                                           | NP_438171.1       | 1          | 7                 | 8          | 20     | 0.91                                                     | 0.87                                                     | 18.18                                                                                  | 16.13                                                                                  | 53.1                                                                                          | 44                                                                                            | 9                                                                              | 9                                                                              | 3695    | 7464           | coronin, actin binding protein, 2A                                                          | Molecular function unknown                   | Nucleus                   | Unclassified                                                   | Cell communication;Signal transduction                           | WD40;CC             | Yes                      |

Supplementary Table S1. List of quantified proteins in OKF6/TERT1-Smoke cells  
 Raigopaln *et al.*, 2017. Role of protein kinase N2 (PKN2) in cigarette smoke-mediated oncogenic transformation of oral cells

| Gene Symbol | Gene ID | Protein Description                                                                       | Protein Accession | # Proteins | # Unique Peptides | # Peptides | # PSMs | OKF6/TERT1-Smoke/<br>OKF6/TERT1-Parental<br>(130/126) R1 | OKF6/TERT1-Smoke/<br>OKF6/TERT1-Parental<br>(128/127) R2 | Ratio Standard Errors [%]:<br>OKF6/TERT1-Smoke/<br>OKF6/TERT1-Parental<br>(130/126) R1 | Ratio Standard Errors [%]:<br>OKF6/TERT1-Smoke/<br>OKF6/TERT1-Parental<br>(128/127) R2 | Ratio Variabilities [%]:<br>F13: OKF6/TERT1-<br>Smoke/<br>OKF6/TERT1-Parental<br>(130/126) R1 | Ratio Variabilities [%]:<br>F13: OKF6/TERT1-<br>Smoke/<br>OKF6/TERT1-Parental<br>(128/127) R2 | Ratio Counts: F13:<br>OKF6/TERT1-Smoke/<br>OKF6/TERT1-Parental<br>(130/126) R1 | Ratio Counts: F13:<br>OKF6/TERT1-Smoke/<br>OKF6/TERT1-Parental<br>(128/127) R2 | HPRD ID | Entrez Gene ID | Gene Name                                                                                     | Molecular Function                         | Primary Localization | Molecular Class                                 | Biological Process                                                           | Domains                          | Plasma Proteome Database |  |
|-------------|---------|-------------------------------------------------------------------------------------------|-------------------|------------|-------------------|------------|--------|----------------------------------------------------------|----------------------------------------------------------|----------------------------------------------------------------------------------------|----------------------------------------------------------------------------------------|-----------------------------------------------------------------------------------------------|-----------------------------------------------------------------------------------------------|--------------------------------------------------------------------------------|--------------------------------------------------------------------------------|---------|----------------|-----------------------------------------------------------------------------------------------|--------------------------------------------|----------------------|-------------------------------------------------|------------------------------------------------------------------------------|----------------------------------|--------------------------|--|
| GEMIN5      | 25929   | gem-associated protein 5 isoform 1                                                        | NP_056280.2       | 2          | 17                | 17         | 38     | 0.91                                                     | 0.87                                                     | 3.18                                                                                   | 6.05                                                                                   | 12.7                                                                                          | 23.4                                                                                          | 19                                                                             | 19                                                                             | 6109    | 25929          | gem (nuclear organelle) associated protein 5                                                  | Ribonucleoprotein                          | Cytoplasm            | Unclassified                                    | Regulation of nucleobase, nucleoside, nucleotide and nucleic acid metabolism | WD40/CC                          | Yes                      |  |
| MMAA        | 166785  | methylmalonic aciduria type A protein, mitochondrial precursor                            | NP_758454.1       | 1          | 1                 | 1          | 3      | 0.91                                                     | 0.86                                                     |                                                                                        |                                                                                        |                                                                                               |                                                                                               | 1                                                                              | 1                                                                              | 7394    | 166785         | methylmalonic aciduria (cobalamin deficiency) type A                                          | ATPase activity                            | Mitochondrion        | ATPase                                          | Metabolism;Energy pathways                                                   | AAA                              | Yes                      |  |
| MVD         | 4597    | diphosphomevalonate decarboxylase                                                         | NP_002452.1       | 1          | 8                 | 8          | 13     | 0.91                                                     | 0.85                                                     | 6.27                                                                                   | 15.69                                                                                  | 17.3                                                                                          | 41.4                                                                                          | 9                                                                              | 9                                                                              | 4454    | 4597           | mevalonate (diphospho) decarboxylase                                                          | Carboxy-lyase activity                     | Cytoplasm            | Enzyme; Decarboxylase                           | Metabolism;Energy pathways                                                   | -                                | Yes                      |  |
| BOLA2       | 552900  | BolA-like protein 2                                                                       | NP_001026997.1    | 1          | 1                 | 1          | 2      | 0.91                                                     | 0.85                                                     |                                                                                        |                                                                                        |                                                                                               |                                                                                               | 1                                                                              | 1                                                                              | 18842   | 552900         | BolA-like 2 (E. coli)                                                                         | Molecular function unknown                 | -                    | Unclassified                                    | Biological process unknown                                                   | -                                | No                       |  |
| VIPAS39     | 63894   | spermatogenesis-defective protein 39 homolog isoform 1                                    | NP_001180243.1    | 2          | 4                 | 4          | 11     | 0.91                                                     | 0.83                                                     | 11.18                                                                                  | 5.65                                                                                   | 25.4                                                                                          | 11.6                                                                                          | 6                                                                              | 6                                                                              |         |                |                                                                                               |                                            |                      |                                                 |                                                                              |                                  |                          |  |
| C2CD2       | 25966   | C2 domain-containing protein 2 isoform 1 precursor                                        | NP_056315.1       | 2          | 2                 | 2          | 4      | 0.91                                                     | 0.81                                                     | 26.96                                                                                  | 18.66                                                                                  | 35.9                                                                                          | 21.5                                                                                          | 2                                                                              | 2                                                                              | 10745   | 25966          | chromosome 21 open reading frame 25                                                           | Molecular function unknown                 | -                    | Unclassified                                    | Biological process unknown                                                   | C2;SP                            | No                       |  |
| NOC3L       | 64318   | nucleolar complex protein 3 homolog                                                       | NP_071896.8       | 1          | 3                 | 3          | 6      | 0.91                                                     | 0.81                                                     | 24.14                                                                                  | 9.26                                                                                   | 39.4                                                                                          | 13.1                                                                                          | 3                                                                              | 3                                                                              | 12562   | 64318          | chromosome 10 open reading frame 117                                                          | Molecular function unknown                 | -                    | Unclassified                                    | Biological process unknown                                                   | CC                               | No                       |  |
| IARS2       | 55699   | isoleucine-tRNA ligase, mitochondrial precursor                                           | NP_060530.3       | 1          | 23                | 23         | 54     | 0.91                                                     | 0.81                                                     | 5.27                                                                                   | 6.79                                                                                   | 25.9                                                                                          | 29.8                                                                                          | 28                                                                             | 28                                                                             | 13334   | 55699          | isoleucine-tRNA synthetase 2, mitochondrial                                                   | TRNA ligase activity                       | Mitochondrion        | -                                               | Metabolism;Energy pathways;Translation                                       | -                                | No                       |  |
| ATPSB       | 506     | ATP synthase subunit beta, mitochondrial precursor                                        | NP_001677.2       | 1          | 23                | 23         | 267    | 0.91                                                     | 0.81                                                     | 2.41                                                                                   | 6.38                                                                                   | 25.8                                                                                          | 65.9                                                                                          | 134                                                                            | 134                                                                            | 44      | 506            | ATP synthase, H+-transporting, mitochondrial F1complex, beta polypeptide                      | Transporter activity                       | Mitochondrion        | Transport/cargo protein                         | Metabolism;Energy pathways                                                   | AAA                              | Yes                      |  |
| ROCK2       | 9475    | rho-associated protein kinase 2                                                           | NP_004841.2       | 2          | 13                | 13         | 25     | 0.91                                                     | 0.8                                                      | 4.2                                                                                    | 8.14                                                                                   | 14.4                                                                                          | 24.9                                                                                          | 14                                                                             | 14                                                                             | 4922    | 9475           | Rho-associated, coiled-coil containing protein kinase 2                                       | Protein serine/threonine kinase activity   | Nucleus;Cytoplasm    | Serine/threonine kinase                         | Cell communication;Signal transduction                                       | S,T_kinase;HR1;CC;PH             | Yes                      |  |
| NOP10       | 55505   | H/ACA ribonucleoprotein complex subunit 3                                                 | NP_061118.1       | 1          | 2                 | 2          | 3      | 0.91                                                     | 0.79                                                     |                                                                                        |                                                                                        |                                                                                               |                                                                                               | 1                                                                              | 1                                                                              | 7571    | 55505          | nucleolar protein family A, member 3 (H/ACA small nucleolar RNPs)                             | Ribonucleoprotein                          | Nucleolus            | Ribonucleoprotein                               | Regulation of nucleobase, nucleoside, nucleotide and nucleic acid metabolism | -                                | No                       |  |
| RAP1GDS1    | 5910    | rap1 GTPase-GDP dissociation stimulator 1 isoform 1                                       | NP_001093896.1    | 6          | 11                | 12         | 36     | 0.91                                                     | 0.78                                                     | 8.42                                                                                   | 17.6                                                                                   | 32.5                                                                                          | 61.5                                                                                          | 17                                                                             | 17                                                                             | 11763   | 5910           | RAP1, GTP-GDP dissociation stimulator 1                                                       | Guanyl-nucleotide exchange factor activity | -                    | Guanine nucleotide exchange factor              | Cell communication;Signal transduction                                       | SP;ARM                           | Yes                      |  |
| ARF5        | 381     | ADP-ribosylation factor 5                                                                 | NP_001653.1       | 1          | 4                 | 8          | 54     | 0.91                                                     | 0.78                                                     | 1.96                                                                                   | 18.15                                                                                  | 3.6                                                                                           | 29                                                                                            | 4                                                                              | 4                                                                              | 55      | 381            | ADP-ribosylation factor 5                                                                     | GTPase activity                            | Cytoplasm            | G protein                                       | Cell communication;Signal transduction                                       | ARF                              | Yes                      |  |
| SLC25A13    | 10165   | calcium-binding mitochondrial carrier protein Anlar2 isoform 1                            | NP_001153682.1    | 2          | 11                | 15         | 47     | 0.91                                                     | 0.77                                                     | 5.36                                                                                   | 7.13                                                                                   | 22                                                                                            | 25                                                                                            | 20                                                                             | 20                                                                             | 4837    | 10165          | solute carrier family 25, member 13 (citrin)                                                  | Transporter activity;Carrier activity      | Mitochondrion        | Calcium binding protein;Transport/cargo protein | Transport                                                                    | EF                               | Yes                      |  |
| PPAP2A      | 8611    | lipid phosphate phosphohydrolase 1 isoform 2                                              | NP_795714.1       | 2          | 1                 | 1          | 2      | 0.91                                                     | 0.75                                                     |                                                                                        |                                                                                        |                                                                                               |                                                                                               | 1                                                                              | 1                                                                              | 6178    | 8611           | phosphatidic acid phosphatase type 2A                                                         | Lipid phosphatase activity                 | Plasma membrane      | Lipid phosphatase                               | Metabolism                                                                   | TM;AcidPpC                       | No                       |  |
| CCDC93      | 54520   | coiled-coil domain-containing protein 93                                                  | NP_061917.3       | 1          | 8                 | 8          | 12     | 0.91                                                     | 0.74                                                     | 13.94                                                                                  | 4.42                                                                                   | 29                                                                                            | 7.4                                                                                           | 5                                                                              | 5                                                                              | 8557    | 54520          | None                                                                                          | Molecular function unknown                 | -                    | Unclassified                                    | Biological process unknown                                                   | CC                               | No                       |  |
| TMEM63B     | 55362   | CSC1-like protein 2                                                                       | NP_060896.1       | 1          | 1                 | 1          | 1      | 0.91                                                     | 0.67                                                     |                                                                                        |                                                                                        |                                                                                               |                                                                                               | 1                                                                              | 1                                                                              | 16656   | 55362          | chromosome 6 open reading frame 110                                                           | Molecular function unknown                 | Integral to membrane | Integral membrane protein                       | Biological process unknown                                                   | SP;TM                            | No                       |  |
| EIF2B4      | 8890    | translation initiation factor eIF-2B subunit delta isoform 1                              | NP_751945.2       | 2          | 1                 | 8          | 15     | 0.91                                                     | 0.64                                                     |                                                                                        |                                                                                        |                                                                                               |                                                                                               | 1                                                                              | 1                                                                              | 9459    | 8890           | eukaryotic translation initiation factor 2B, subunit 4, delta, 67kDa                          | Translation regulator activity             | Cytoplasm            | Translation regulatory protein                  | Protein metabolism                                                           | CC                               | Yes                      |  |
| WWTR1       | 25937   | WW domain-containing transcription regulator protein 1                                    | NP_056287.1       | 1          | 1                 | 1          | 2      | 0.91                                                     | 0.64                                                     |                                                                                        |                                                                                        |                                                                                               |                                                                                               | 1                                                                              | 1                                                                              | 9580    | 25937          | WW domain containing transcription regulator 1                                                | Transcription regulator activity           | Nucleus              | Transcription regulatory protein                | Regulation of nucleobase, nucleoside, nucleotide and nucleic acid metabolism | WW                               | No                       |  |
| ADAMTS14    | 140766  | A disintegrin and metalloproteinase with thrombospondin motifs 14 isoform 1 preproprotein | NP_631894.2       | 5          | 1                 | 1          | 1      | 0.91                                                     | 0.53                                                     |                                                                                        |                                                                                        |                                                                                               |                                                                                               | 1                                                                              | 1                                                                              | 6329    | 140766         | a disintegrin-like and metalloproteinase (prolysin type) with thrombospondin type 1 motif, 14 | Metallopeptidase activity                  | Extracellular        | Metallo protease                                | Protein metabolism                                                           | SP;REP;TSP1                      | Yes                      |  |
| TMPPE       | 643853  | transmembrane protein with metallophosphoesterase domain isoform 1                        | NP_001034859.2    | 2          | 1                 | 1          | 4      | 0.91                                                     |                                                          |                                                                                        |                                                                                        |                                                                                               |                                                                                               | 1                                                                              |                                                                                | 18951   | 643853         | None                                                                                          | Molecular function unknown                 | -                    | Unclassified                                    | Biological process unknown                                                   | SP;TM                            | No                       |  |
| MRPS18A     | 55168   | 28S ribosomal protein S18a, mitochondrial isoform 1 precursor                             | NP_060605.1       | 2          | 2                 | 2          | 3      | 0.9                                                      | 1.83                                                     | 11.69                                                                                  | 25.91                                                                                  | 15                                                                                            | 75.4                                                                                          | 2                                                                              | 2                                                                              | 14780   | 55168          | mitochondrial ribosomal protein S18A                                                          | Structural constituent of ribosome         | Mitochondrion        | Ribosomal subunit                               | Protein metabolism                                                           | SP                               | Yes                      |  |
| RRP9        | 9136    | U3 small nucleolar RNA-interacting protein 2                                              | NP_004695.1       | 1          | 4                 | 4          | 8      | 0.9                                                      | 1.5                                                      | 24.06                                                                                  | 11.01                                                                                  | 45.2                                                                                          | 33.9                                                                                          | 4                                                                              | 4                                                                              | 8827    | 9136           | RNA, U3 small nucleolar interacting protein 2                                                 | Ribonucleoprotein                          | Nucleolus            | RNA binding protein                             | Regulation of nucleobase, nucleoside, nucleotide and nucleic acid metabolism | WD40;NLS;CC                      | Yes                      |  |
| TUFM        | 7284    | elongation factor Tu, mitochondrial precursor                                             | NP_003312.3       | 1          | 20                | 20         | 59     | 0.9                                                      | 1.49                                                     | 3.82                                                                                   | 3.45                                                                                   | 20.2                                                                                          | 30.6                                                                                          | 34                                                                             | 34                                                                             | 3861    | 7284           | Tu translation elongation factor, mitochondrial                                               | Translation regulator activity             | Mitochondrion        | Translation regulatory protein                  | Protein metabolism                                                           | GTP_EFTU;GTP_EFTU_D2;GTP_EFTU_D3 | Yes                      |  |
| EIF2B4      | 8890    | translation initiation factor eIF-2B subunit delta isoform 2                              | NP_001029288.1    | 1          | 1                 | 8          | 15     | 0.9                                                      | 1.46                                                     |                                                                                        |                                                                                        |                                                                                               |                                                                                               | 1                                                                              | 1                                                                              | 9459    | 8890           | eukaryotic translation initiation factor 2B, subunit 4, delta, 67kDa                          | Translation regulator activity             | Cytoplasm            | Translation regulatory protein                  | Protein metabolism                                                           | CC                               | Yes                      |  |
| USP11       | 8237    | ubiquitin carboxyl-terminal hydrolase 11                                                  | NP_004642.2       | 1          | 3                 | 4          | 4      | 0.9                                                      | 1.4                                                      |                                                                                        |                                                                                        |                                                                                               |                                                                                               | 1                                                                              | 1                                                                              | 2081    | 8237           | ubiquitin specific protease 11                                                                | Ubiquitin-specific protease activity       | Nucleus              | Ubiquitin proteasome system protein             | Protein metabolism                                                           | DUSP;UCH                         | Yes                      |  |

Supplementary Table S1. List of quantified proteins in OKF6/TERT1-Smoke cells  
 Raingonalan et al., 2017. Role of protein kinase N2 (PKN2) in cigarette smoke-mediated oncogenic transformation of oral cells

| Gene Symbol | Gene ID | Protein Description                                                | Protein Accession | # Proteins | # Unique Peptides | # Peptides | # PSMs | OKF6/TERT1-Smoke/<br>OKF6/TERT1-Parental<br>(130/126) R1 | OKF6/TERT1-Smoke/<br>OKF6/TERT1-Parental<br>(128/127) R2 | Ratio Standard Errors [%]:<br>OKF6/TERT1-Smoke/<br>OKF6/TERT1-Parental<br>(130/126) R1 | Ratio Standard Errors [%]:<br>OKF6/TERT1-Smoke/<br>OKF6/TERT1-Parental<br>(128/127) R2 | Ratio Variabilities [%]:<br>F13: OKF6/TERT1-<br>Smoke/<br>OKF6/TERT1-Parental<br>(130/126) R1 | Ratio Variabilities [%]:<br>F13: OKF6/TERT1-<br>Smoke/<br>OKF6/TERT1-Parental<br>(128/127) R2 | Ratio Counts: F13:<br>OKF6/TERT1-Smoke/<br>OKF6/TERT1-Parental<br>(130/126) R1 | Ratio Counts: F13:<br>OKF6/TERT1-Smoke/<br>OKF6/TERT1-Parental<br>(128/127) R2 | HPRD ID | Entrez Gene ID | Gene Name                                                                                                                   | Molecular Function                            | Primary Localization           | Molecular Class                          | Biological Process                                               | Domains                                     | Plasma Proteome Database |  |
|-------------|---------|--------------------------------------------------------------------|-------------------|------------|-------------------|------------|--------|----------------------------------------------------------|----------------------------------------------------------|----------------------------------------------------------------------------------------|----------------------------------------------------------------------------------------|-----------------------------------------------------------------------------------------------|-----------------------------------------------------------------------------------------------|--------------------------------------------------------------------------------|--------------------------------------------------------------------------------|---------|----------------|-----------------------------------------------------------------------------------------------------------------------------|-----------------------------------------------|--------------------------------|------------------------------------------|------------------------------------------------------------------|---------------------------------------------|--------------------------|--|
| BCR         | 613     | breakpoint cluster region protein isoform 1                        | NP_004318.3       | 2          | 4                 | 5          | 9      | 0.9                                                      | 1.39                                                     | 25.09                                                                                  | 2.32                                                                                   | 47.5                                                                                          | 6.5                                                                                           | 4                                                                              | 4                                                                              | 1044    | 613            | breakpoint cluster region                                                                                                   | Protein serine/threonine kinase activity      | Cytoplasm                      | Serine/threonine kinase                  | Cell communication; Signal transduction                          | RHOGEF;RHOGAP;PH;C2;CC                      | Yes                      |  |
| LUC7L3      | 51747   | luc7-like protein 3                                                | NP_057508.2       | 1          | 6                 | 6          | 23     | 0.9                                                      | 1.34                                                     | 10.04                                                                                  | 2.56                                                                                   | 29                                                                                            | 10.9                                                                                          | 10                                                                             | 10                                                                             | 16759   | 51747          | None                                                                                                                        | Transcription regulator activity              | Nucleus                        | Transcription regulatory protein         | Regulation of nucleobase, nucleotide and nucleic acid metabolism | CC                                          | Yes                      |  |
| DEGS1       | 8560    | sphingolipid delta(4)-desaturase DES1                              | NP_003667.1       | 1          | 2                 | 2          | 3      | 0.9                                                      | 1.31                                                     |                                                                                        |                                                                                        |                                                                                               |                                                                                               | 1                                                                              | 1                                                                              | 13133   | 8560           | degenerative spermatocyte homolog 1, lipid desaturase (Drosophila)                                                          | Oxidoreductase activity                       | Endoplasmic reticulum membrane | Enzyme: Oxidoreductase                   | Energy pathways; Lipid metabolism                                | TM                                          | Yes                      |  |
| DAPK3       | 1613    | death-associated protein kinase 3                                  | NP_001339.1       | 2          | 2                 | 2          | 5      | 0.9                                                      | 1.25                                                     | 0.35                                                                                   | 1.52                                                                                   | 0.4                                                                                           | 2.7                                                                                           | 2                                                                              | 2                                                                              | 4478    | 1613           | death-associated protein kinase 3                                                                                           | Protein serine/threonine kinase activity      | Nucleus                        | Serine/threonine kinase                  | Cell communication; Signal transduction                          | S_T_kinase;CC;L1Z                           | Yes                      |  |
| RBM22       | 55696   | pre-mRNA-splicing factor RBM22                                     | NP_060517.1       | 1          | 7                 | 7          | 11     | 0.9                                                      | 1.22                                                     | 6.97                                                                                   | 3.43                                                                                   | 14.1                                                                                          | 9.4                                                                                           | 5                                                                              | 5                                                                              | 10186   | 55696          | RNA binding motif protein 22                                                                                                | Molecular function unknown                    | -                              | Unclassified                             | Biological process unknown                                       | RRM;ZnF_C3H1                                | No                       |  |
| DNAA2       | 10294   | dnaJ homolog subfamily A member 2                                  | NP_005871.1       | 1          | 10                | 10         | 21     | 0.9                                                      | 1.22                                                     | 7.34                                                                                   | 4.94                                                                                   | 23.2                                                                                          | 21                                                                                            | 12                                                                             | 12                                                                             | 7105    | 10294          | DnaJ (Hsp40) homolog, subfamily A, member 2                                                                                 | Chaperone activity                            | Cytoplasm                      | Chaperone                                | Protein metabolism                                               | DNAJ                                        | Yes                      |  |
| RPP30       | 10556   | ribonuclease P protein subunit p30 isoform a                       | NP_001098016.1    | 2          | 4                 | 4          | 11     | 0.9                                                      | 1.21                                                     | 5.16                                                                                   | 6.48                                                                                   | 11.4                                                                                          | 19.3                                                                                          | 6                                                                              | 6                                                                              | 9359    | 10556          | ribonuclease P/MRP 30kDa subunit                                                                                            | Ribonuclease activity                         | Nucleus                        | Ribonuclease                             | Regulation of nucleobase, nucleotide and nucleic acid metabolism | -                                           | Yes                      |  |
| MED27       | 9442    | mediator of RNA polymerase II transcription subunit 27 isoform 1   | NP_004260.2       | 2          | 2                 | 2          | 2      | 0.9                                                      | 1.21                                                     |                                                                                        |                                                                                        |                                                                                               |                                                                                               | 1                                                                              | 1                                                                              | 5438    | 9442           | cofactor required for Sp1 transcriptional activation, subunit 8, 34kDa                                                      | Transcription regulator activity              | Nucleus                        | Transcription regulatory protein         | Regulation of nucleobase, nucleotide and nucleic acid metabolism | -                                           | No                       |  |
| PDCL3       | 79031   | phoducin-like protein 3                                            | NP_076970.1       | 1          | 6                 | 6          | 12     | 0.9                                                      | 1.2                                                      | 2.17                                                                                   | 17.98                                                                                  | 5.2                                                                                           | 62.1                                                                                          | 7                                                                              | 7                                                                              | 17827   | 79031          | phoducin-like 3                                                                                                             | Molecular function unknown                    | Cytoplasm                      | Unclassified                             | Apoptosis                                                        | CC                                          | Yes                      |  |
| LYPLA1      | 10434   | acyl-protein thioesterase 1 isoform 1                              | NP_006321.1       | 6          | 6                 | 6          | 13     | 0.9                                                      | 1.2                                                      | 0.49                                                                                   | 10.61                                                                                  | 1.2                                                                                           | 34.7                                                                                          | 7                                                                              | 7                                                                              | 7063    | 10434          | lysophospholipase 1                                                                                                         | Phospholipase activity                        | Endoplasmic reticulum          | Enzyme: Phospholipase                    | Metabolism; Energy pathways                                      | -                                           | Yes                      |  |
| BRAT1       | 221927  | BRCA1-associated ATM activator 1                                   | NP_689562.2       | 1          | 3                 | 3          | 5      | 0.9                                                      | 1.16                                                     | 5.68                                                                                   | 6.05                                                                                   | 8.9                                                                                           | 12.2                                                                                          | 3                                                                              | 3                                                                              |         |                |                                                                                                                             |                                               |                                |                                          |                                                                  |                                             |                          |  |
| RBM42       | 79171   | RNA-binding protein 42                                             | NP_077297.2       | 1          | 3                 | 3          | 6      | 0.9                                                      | 1.16                                                     | 10.98                                                                                  | 11.63                                                                                  | 17.3                                                                                          | 23.6                                                                                          | 3                                                                              | 3                                                                              | 11303   | 79171          | None                                                                                                                        | Molecular function unknown                    | -                              | Unclassified                             | Biological process unknown                                       | RRM                                         | No                       |  |
| SGPL1       | 8879    | sphingosine-1-phosphate lyase 1                                    | NP_003892.2       | 1          | 8                 | 8          | 15     | 0.9                                                      | 1.14                                                     | 12.46                                                                                  | 5.39                                                                                   | 34.8                                                                                          | 18.6                                                                                          | 9                                                                              | 9                                                                              | 7224    | 8879           | sphingosine-1-phosphate lyase 1                                                                                             | Lyase activity                                | Endoplasmic reticulum          | Enzyme: Lyase                            | Metabolism; Energy pathways                                      | -                                           | Yes                      |  |
| TRIO        | 7204    | triple functional domain protein                                   | NP_009049.2       | 1          | 7                 | 7          | 12     | 0.9                                                      | 1.13                                                     | 13.14                                                                                  | 7.49                                                                                   | 32.3                                                                                          | 22.8                                                                                          | 7                                                                              | 7                                                                              | 3537    | 7204           | triple functional domain (PTPRF interacting)                                                                                | Guanyl-nucleotide exchange factor activity    | Cytoplasm                      | Guanine nucleotide exchange factor       | Cell communication; Signal transduction                          | SEC14;SPECTRIN;RHOGEF;PH;H3;IGC2;S_T_kinase | Yes                      |  |
| CD151       | 977     | CD151 antigen                                                      | NP_004348.2       | 1          | 4                 | 4          | 7      | 0.9                                                      | 1.12                                                     | 7.19                                                                                   | 8.71                                                                                   | 13                                                                                            | 19.7                                                                                          | 4                                                                              | 4                                                                              | 3763    | 977            | CD151 antigen                                                                                                               | Receptor activity                             | Plasma membrane                | Cell surface receptor                    | Cell communication; Cell motility                                | TM                                          | No                       |  |
| ATP5O       | 539     | ATP synthase subunit O, mitochondrial precursor                    | NP_001688.1       | 1          | 12                | 12         | 56     | 0.9                                                      | 1.1                                                      | 4.63                                                                                   | 4.99                                                                                   | 23.9                                                                                          | 31.4                                                                                          | 32                                                                             | 31                                                                             | 2899    | 539            | ATP synthase, H <sup>+</sup> -transporting, mitochondrial F1 complex, O subunit (oligomycin sensitivity conferring protein) | Transporter activity                          | Mitochondrion                  | Transport/cargo protein                  | Metabolism; Energy pathways                                      | -                                           | Yes                      |  |
| BIRC6       | 57448   | baculoviral IAP repeat-containing protein 6                        | NP_057336.3       | 1          | 6                 | 6          | 9      | 0.9                                                      | 1.09                                                     | 4.11                                                                                   | 3.21                                                                                   | 6.4                                                                                           | 6.1                                                                                           | 3                                                                              | 3                                                                              | 5731    | 57448          | baculoviral IAP repeat-containing 6 (apollon)                                                                               | Receptor signaling complex scaffold activity  | Cytoplasm                      | Adapter molecule                         | Apoptosis                                                        | BIRUBC;CC                                   | Yes                      |  |
| RRP15       | 51018   | RRP15-like protein                                                 | NP_057136.2       | 1          | 3                 | 3          | 5      | 0.9                                                      | 1.09                                                     | 3.38                                                                                   | 23.65                                                                                  | 4.3                                                                                           | 37.9                                                                                          | 2                                                                              | 2                                                                              | 10822   | 51018          | None                                                                                                                        | Molecular function unknown                    | Nucleus                        | Unclassified                             | Biological process unknown                                       | CC                                          | No                       |  |
| SPTAN1      | 6709    | spectrin alpha chain, non-erythrocytic 1 isoform 2                 | NP_003118.2       | 4          | 99                | 99         | 274    | 0.9                                                      | 1.08                                                     | 2.49                                                                                   | 2.11                                                                                   | 28                                                                                            | 28.2                                                                                          | 148                                                                            | 147                                                                            | 1684    | 6709           | spectrin, alpha, non-erythrocytic 1 (alpha-fodrin)                                                                          | Structural constituent of cytoskeleton        | Cytoplasm; Nucleus             | Cytoskeletal protein; Structural protein | Cell growth and/or maintenance                                   | SPECTRIN;CC                                 | Yes                      |  |
| PGAM1       | 5223    | phosphoglycerate mutase 1                                          | NP_002620.1       | 2          | 11                | 18         | 110    | 0.9                                                      | 1.07                                                     | 6.45                                                                                   | 7.3                                                                                    | 32.6                                                                                          | 44.8                                                                                          | 30                                                                             | 30                                                                             | 1392    | 5223           | phosphoglycerate mutase 1 (brin)                                                                                            | Catalytic activity                            | Cytoplasm                      | Enzyme: Mutase                           | Metabolism; Energy pathways                                      | -                                           | Yes                      |  |
| PGM2        | 55276   | phosphoglucomutase-2                                               | NP_060760.2       | 1          | 12                | 12         | 28     | 0.9                                                      | 1.06                                                     | 3.17                                                                                   | 5.15                                                                                   | 12.6                                                                                          | 24.2                                                                                          | 19                                                                             | 19                                                                             | 11761   | 55276          | phosphoglucomutase 2                                                                                                        | Catalytic activity                            | -                              | Enzyme: Phosphotransferase               | Metabolism; Energy pathways                                      | -                                           | Yes                      |  |
| SEC63       | 11231   | translocation protein SEC63 homolog                                | NP_009145.1       | 1          | 16                | 16         | 38     | 0.9                                                      | 1.06                                                     | 4.47                                                                                   | 6.29                                                                                   | 19.4                                                                                          | 32.9                                                                                          | 23                                                                             | 23                                                                             | 9783    | 11231          | SEC63-like (S. cerevisiae)                                                                                                  | Transporter activity                          | Endoplasmic reticulum          | Transport/cargo protein                  | Transport                                                        | TM;DNAJ;CC                                  | Yes                      |  |
| NUP107      | 57122   | nuclear pore complex protein Nup107                                | NP_065134.1       | 1          | 16                | 16         | 30     | 0.9                                                      | 1.05                                                     | 11.73                                                                                  | 7.76                                                                                   | 35.9                                                                                          | 27.6                                                                                          | 11                                                                             | 11                                                                             | 6356    | 57122          | nucleoporin 107kDa                                                                                                          | Transporter activity                          | Nucleus                        | Transport/cargo protein                  | Transport                                                        | -                                           | Yes                      |  |
| PPP4C       | 5531    | serine/threonine-protein phosphatase 4 catalytic subunit isoform 1 | NP_002711.1       | 3          | 4                 | 6          | 13     | 0.9                                                      | 1.05                                                     | 8.49                                                                                   | 13.71                                                                                  | 15.4                                                                                          | 29.3                                                                                          | 4                                                                              | 4                                                                              | 3615    | 5531           | protein phosphatase 4 (formerly X), catalytic subunit                                                                       | Protein serine/threonine phosphatase activity | Nucleus                        | Serine/threonine phosphatase             | Cell communication; Signal transduction                          | PP2A                                        | No                       |  |
| MRPL53      | 116540  | 39S ribosomal protein L53, mitochondrial                           | NP_444278.1       | 1          | 1                 | 1          | 1      | 0.9                                                      | 1.04                                                     |                                                                                        |                                                                                        |                                                                                               |                                                                                               | 1                                                                              | 1                                                                              | 14771   | 116540         | mitochondrial ribosomal protein L53                                                                                         | Structural constituent of ribosome            | Mitochondrion                  | Ribosomal subunit                        | Protein metabolism                                               | -                                           | No                       |  |
| ABCF3       | 55324   | ATP-binding cassette sub-family F member 3                         | NP_060828.2       | 1          | 9                 | 9          | 16     | 0.9                                                      | 1.04                                                     | 7.36                                                                                   | 6.85                                                                                   | 20                                                                                            | 21.7                                                                                          | 9                                                                              | 9                                                                              | 12404   | 55324          | ATP-binding cassette, sub-family F (GCN20), member 3                                                                        | Transporter activity                          | -                              | Transport/cargo protein                  | Transport                                                        | AAA                                         | No                       |  |
| CSTF2       | 1478    | cleavage stimulation factor subunit 2 isoform 1                    | NP_001293135.1    | 3          | 2                 | 5          | 10     | 0.9                                                      | 1.03                                                     | 18.48                                                                                  | 5.6                                                                                    | 23.7                                                                                          | 8.2                                                                                           | 2                                                                              | 2                                                                              | 2652    | 1478           | cleavage stimulation factor, 3' pre-RNA, subunit 2, 64kDa                                                                   | RNA binding                                   | Nucleus                        | RNA binding protein                      | Regulation of nucleobase, nucleotide and nucleic acid metabolism | RRM                                         | Yes                      |  |

Supplementary Table S1. List of quantified proteins in OKF6/TERT1-Smoke cells  
 Raingonalan *et al.*, 2017. Role of protein kinase N2 (PKN2) in cigarette smoke-mediated oncogenic transformation of oral cells

| Gene Symbol | Gene ID | Protein Description                                                              | Protein Accession | # Proteins | # Unique Peptides | # Peptides | # PSMs | OKF6/TERT1-Smoke/<br>OKF6/TERT1-Parental<br>(130/126) R1 | OKF6/TERT1-Smoke/<br>OKF6/TERT1-Parental<br>(128/127) R2 | Ratio Standard Errors [%]:<br>OKF6/TERT1-Smoke/<br>OKF6/TERT1-Parental<br>(130/126) R1 | Ratio Standard Errors [%]:<br>OKF6/TERT1-Smoke/<br>OKF6/TERT1-Parental<br>(128/127) R2 | Ratio Variabilities [%]:<br>F13: OKF6/TERT1-<br>Smoke/<br>OKF6/TERT1-Parental<br>(130/126) R1 | Ratio Variabilities [%]:<br>F13: OKF6/TERT1-<br>Smoke/<br>OKF6/TERT1-Parental<br>(128/127) R2 | Ratio Counts: F13:<br>OKF6/TERT1-Smoke/<br>OKF6/TERT1-Parental<br>(130/126) R1 | Ratio Counts: F13:<br>OKF6/TERT1-Smoke/<br>OKF6/TERT1-Parental<br>(128/127) R2 | HPRD ID | Entrez Gene ID | Gene Name                                                                 | Molecular Function                                             | Primary Localization      | Molecular Class                                       | Biological Process                                                           | Domains                       | Plasma Proteome Database |
|-------------|---------|----------------------------------------------------------------------------------|-------------------|------------|-------------------|------------|--------|----------------------------------------------------------|----------------------------------------------------------|----------------------------------------------------------------------------------------|----------------------------------------------------------------------------------------|-----------------------------------------------------------------------------------------------|-----------------------------------------------------------------------------------------------|--------------------------------------------------------------------------------|--------------------------------------------------------------------------------|---------|----------------|---------------------------------------------------------------------------|----------------------------------------------------------------|---------------------------|-------------------------------------------------------|------------------------------------------------------------------------------|-------------------------------|--------------------------|
| PDE5A       | 8654    | cGMP-specific 3',5'-cyclic phosphodiesterase isoform 1                           | NP_001074.2       | 3          | 1                 | 1          | 2      | 0.9                                                      | 1.02                                                     |                                                                                        |                                                                                        |                                                                                               |                                                                                               | 1                                                                              | 1                                                                              | 4497    | 8654           | phosphodiesterase 5A, cGMP-specific                                       | Phosphoric diester hydrolase activity                          | Nucleus                   | Enzyme: Phosphodiesterase                             | Cell communication;Signal transduction                                       | GAFF_HDC                      | Yes                      |
| EEF2        | 1938    | elongation factor 2                                                              | NP_001952.1       | 1          | 46                | 47         | 305    | 0.9                                                      | 1.02                                                     | 3.39                                                                                   | 2.75                                                                                   | 39.5                                                                                          | 35.9                                                                                          | 156                                                                            | 155                                                                            | 561     | 1938           | eukaryotic translation elongation factor 2                                | Translation regulator activity                                 | Cytoplasm                 | Translation regulatory protein                        | Protein metabolism;Translation                                               | -                             | Yes                      |
| PARN        | 5073    | poly(A)-specific ribonuclease PARN isoform 1                                     | NP_002573.1       | 3          | 3                 | 3          | 4      | 0.9                                                      | 1.02                                                     | 17.29                                                                                  | 13.27                                                                                  | 22.2                                                                                          | 19.3                                                                                          | 2                                                                              | 2                                                                              | 7250    | 5073           | poly(A)-specific ribonuclease (deadenylationnuclease)                     | Ribonuclease activity                                          | Cytoplasm                 | Ribonuclease                                          | Regulation of nucleobase, nucleoside, nucleotide and nucleic acid metabolism | CCR3H                         | Yes                      |
| GLYR1       | 84656   | putative oxidoreductase GLYR1                                                    | NP_115958.2       | 1          | 4                 | 4          | 6      | 0.9                                                      | 1.01                                                     | 8.36                                                                                   | 8.35                                                                                   | 15.2                                                                                          | 16.9                                                                                          | 4                                                                              | 4                                                                              | 17625   | 84656          | None                                                                      | Catalytic activity                                             | Nucleus                   | Enzyme: Dehydrogenase                                 | Metabolism;Energy pathways                                                   | PWWP_AT_hook                  | Yes                      |
| DNAJB4      | 11080   | dnaJ homolog subfamily B member 4                                                | NP_008965.2       | 1          | 4                 | 5          | 10     | 0.9                                                      | 1.01                                                     | 31.72                                                                                  | 23.42                                                                                  | 52.7                                                                                          | 42.8                                                                                          | 3                                                                              | 3                                                                              | 7486    | 11080          | DnaJ (Hsp40) homolog, subfamily B, member 4                               | Heat shock protein activity                                    | -                         | Heat shock protein                                    | Protein metabolism                                                           | DNAJ                          | Yes                      |
| YTHDF2      | 51441   | YTH domain-containing family protein 2 isoform 1                                 | NP_001166599.1    | 2          | 4                 | 7          | 10     | 0.9                                                      | 1.01                                                     | 10.11                                                                                  | 2.71                                                                                   | 18.4                                                                                          | 5.5                                                                                           | 4                                                                              | 4                                                                              | 6587    | 51441          | YTH domain family, member 2                                               | Molecular function unknown                                     | -                         | Unclassified                                          | Biological process unknown                                                   | -                             | Yes                      |
| DUS2        | 54920   | tRNA-dihydropyridinase(20) synthase [NAD(P)+-like isoform 1                      | NP_060273.1       | 2          | 1                 | 1          | 2      | 0.9                                                      | 1.01                                                     |                                                                                        |                                                                                        |                                                                                               |                                                                                               | 1                                                                              | 1                                                                              |         |                |                                                                           |                                                                |                           |                                                       |                                                                              |                               |                          |
| ZBTB33      | 10009   | transcriptional regulator Kaiso                                                  | NP_006768.1       | 1          | 1                 | 1          | 3      | 0.9                                                      | 1                                                        |                                                                                        |                                                                                        |                                                                                               |                                                                                               | 1                                                                              | 1                                                                              | 2269    | 10009          | zinc finger and BTB domain containing 33                                  | Transcription factor activity;Transcription regulator activity | Nucleus                   | Transcription regulatory protein;Transcription factor | Regulation of nucleobase, nucleoside, nucleotide and nucleic acid metabolism | BTB;ZNF2;NLS                  | Yes                      |
| TTC27       | 55622   | tetratricopeptide repeat protein 27 isoform 1                                    | NP_060205.3       | 2          | 3                 | 3          | 7      | 0.9                                                      | 0.99                                                     | 9.04                                                                                   | 6.21                                                                                   | 16.3                                                                                          | 12.4                                                                                          | 4                                                                              | 4                                                                              | 8618    | 55622          | None                                                                      | Molecular function unknown                                     | -                         | Unclassified                                          | Biological process unknown                                                   | TPR                           | No                       |
| ASAP2       | 8853    | arF-GAP with SH3 domain, ANK repeat and PH domain-containing protein 2 isoform a | NP_003878.1       | 2          | 6                 | 6          | 14     | 0.9                                                      | 0.99                                                     | 3.11                                                                                   | 1.35                                                                                   | 6.9                                                                                           | 3.3                                                                                           | 6                                                                              | 6                                                                              | 4820    | 8853           | development and differentiation enhancing factor 2                        | GTPase activator activity                                      | Golgi apparatus;Cytoplasm | GTPase activating protein                             | Cell communication;Signal transduction                                       | PH;ARFGAP;ANK;SH3;BAR         | Yes                      |
| GFM2        | 84340   | ribosome-releasing factor 2, mitochondrial isoform 4                             | NP_001268231.4    | 4          | 4                 | 4          | 15     | 0.9                                                      | 0.99                                                     | 3.26                                                                                   | 11.49                                                                                  | 7.8                                                                                           | 30.6                                                                                          | 7                                                                              | 7                                                                              | 9413    | 84340          | G elongation factor, mitochondrial 2                                      | Translation regulator activity                                 | Mitochondrion             | Translation regulatory protein                        | Regulation of translation                                                    | GTP_EFTU;GTP_EFTU_D2          | Yes                      |
| GORASP2     | 26003   | Golgi assembly-stacking protein 2 isoform 1                                      | NP_056345.3       | 2          | 4                 | 4          | 12     | 0.9                                                      | 0.99                                                     | 8.39                                                                                   | 11.99                                                                                  | 18.7                                                                                          | 29.6                                                                                          | 6                                                                              | 6                                                                              | 8303    | 26003          | golgi reassembly stacking protein 2, 55kDa                                | Transporter activity                                           | Golgi apparatus           | Transport/cargo protein                               | Transport                                                                    | PDZ                           | Yes                      |
| NCAPG       | 64151   | condensin complex subunit 3                                                      | NP_071741.2       | 1          | 10                | 10         | 20     | 0.9                                                      | 0.99                                                     | 8.11                                                                                   | 4.96                                                                                   | 24.7                                                                                          | 16.4                                                                                          | 11                                                                             | 11                                                                             | 12097   | 64151          | None                                                                      | DNA binding                                                    | Nucleus                   | DNA binding protein                                   | Regulation of nucleobase, nucleoside, nucleotide and nucleic acid metabolism | CC;HEAT                       | Yes                      |
| H3F3A       | 3020    | histone H3.3                                                                     | NP_002098.1       | 2          | 2                 | 7          | 32     | 0.9                                                      | 0.97                                                     | 10.65                                                                                  | 2.11                                                                                   | 13.6                                                                                          | 2.9                                                                                           | 2                                                                              | 2                                                                              | 3082    | 3020           | H3 histone, family 3A                                                     | DNA binding                                                    | Nucleus                   | DNA binding protein                                   | Regulation of nucleobase, nucleoside, nucleotide and nucleic acid metabolism | -                             | No                       |
| RAB3GAP1    | 22930   | rab3 GTPase-activating protein catalytic subunit isoform 2                       | NP_036365.1       | 2          | 15                | 15         | 29     | 0.9                                                      | 0.97                                                     | 6.94                                                                                   | 7.36                                                                                   | 27.6                                                                                          | 31.8                                                                                          | 19                                                                             | 19                                                                             | 16002   | 22930          | None                                                                      | GTPase activator activity                                      | Nucleus                   | GTPase activating protein                             | Cell communication;Signal transduction                                       | -                             | Yes                      |
| HIF1AN      | 55662   | hypoxia-inducible factor 1-alpha inhibitor                                       | NP_060372.2       | 1          | 1                 | 1          | 1      | 0.9                                                      | 0.97                                                     |                                                                                        |                                                                                        |                                                                                               |                                                                                               | 1                                                                              | 1                                                                              | 9426    | 55662          | hypoxia-inducible factor 1, alpha subunitinhibitor                        | Catalytic activity                                             | Cytoplasm                 | Enzyme: Hydroxylase                                   | Metabolism;Energy pathways                                                   | JMIC                          | Yes                      |
| EIF2AK2     | 5610    | interferon-induced, double-stranded RNA-activated protein kinase isoform a       | NP_001129123.1    | 2          | 15                | 15         | 54     | 0.9                                                      | 0.97                                                     | 3.28                                                                                   | 3.24                                                                                   | 14.8                                                                                          | 15.8                                                                                          | 25                                                                             | 25                                                                             | 1468    | 5610           | eukaryotic translation initiation factor2, alpha kinase 2                 | Protein serine/threonine kinase activity                       | Ribosome                  | Serine/threonine kinase                               | Cell communication;Signal transduction                                       | S_T_kinase;DSR;M_S_T_Y_kinase | Yes                      |
| TM9SF3      | 56889   | transmembrane 9 superfamily member 3 precursor                                   | NP_064508.3       | 1          | 4                 | 4          | 9      | 0.9                                                      | 0.96                                                     | 11.92                                                                                  | 7.74                                                                                   | 26.7                                                                                          | 18.3                                                                                          | 6                                                                              | 6                                                                              | 18073   | 56889          | None                                                                      | Auxiliary transport protein activity                           | Plasma membrane           | Membrane transport protein                            | Transport                                                                    | SP;TM                         | Yes                      |
| ANXA1       | 301     | annexin A1                                                                       | NP_000691.1       | 1          | 28                | 28         | 273    | 0.9                                                      | 0.96                                                     | 2.72                                                                                   | 2.62                                                                                   | 29.2                                                                                          | 30                                                                                            | 136                                                                            | 136                                                                            | 1060    | 301            | annexin A1                                                                | Calcium ion binding                                            | Plasma membrane           | Calcium binding protein                               | Cell communication;Signal transduction                                       | ANX                           | Yes                      |
| DARS        | 1615    | aspartate-tRNA ligase, cytoplasmic isoform 1                                     | NP_001340.2       | 2          | 28                | 28         | 90     | 0.9                                                      | 0.96                                                     | 4.16                                                                                   | 4.41                                                                                   | 26.6                                                                                          | 30.2                                                                                          | 49                                                                             | 49                                                                             | 4361    | 1615           | aspartyl-tRNA synthetase                                                  | ATPase activity                                                | Cytoplasm                 | ATPase                                                | Metabolism;Energy pathways                                                   | TRNA                          | Yes                      |
| ELP6        | 54859   | elongator complex protein 6                                                      | NP_001026873.2    | 1          | 2                 | 2          | 2      | 0.9                                                      | 0.96                                                     | 19.17                                                                                  | 0.62                                                                                   | 24.8                                                                                          | 0.8                                                                                           | 2                                                                              | 2                                                                              |         |                |                                                                           |                                                                |                           |                                                       |                                                                              |                               |                          |
| EIF3C       | 8663    | eukaryotic translation initiation factor 3 subunit C isoform a                   | NP_001032897.1    | 3          | 21                | 21         | 65     | 0.9                                                      | 0.96                                                     | 4.63                                                                                   | 4.9                                                                                    | 25.6                                                                                          | 29.2                                                                                          | 37                                                                             | 37                                                                             | 4889    | 8663           | eukaryotic translation initiation factor 3 subunit C, 110kDa              | Translation regulator activity                                 | Cytoplasm                 | Translation regulatory protein                        | Protein metabolism                                                           | CC;PNT                        | Yes                      |
| C21orf33    | 8209    | ES1 protein homolog, mitochondrial isoform Ia precursor                          | NP_004640.3       | 2          | 6                 | 6          | 13     | 0.9                                                      | 0.95                                                     | 1.56                                                                                   | 10.96                                                                                  | 3.7                                                                                           | 28.1                                                                                          | 7                                                                              | 7                                                                              | 9044    | 8209           | chromosome 21 open reading frame 33                                       | Molecular function unknown                                     | Mitochondrion             | Unclassified                                          | Biological process unknown                                                   | SP                            | Yes                      |
| IKKBK       | 3551    | inhibitor of nuclear factor kappa-B kinase subunit beta isoform 1                | NP_001547.1       | 3          | 2                 | 3          | 4      | 0.9                                                      | 0.95                                                     |                                                                                        |                                                                                        |                                                                                               |                                                                                               | 1                                                                              | 1                                                                              | 4462    | 3551           | inhibitor of kappa light polypeptide geneenhancer in B cells, kinase beta | Protein serine/threonine kinase activity                       | Cytoplasm                 | Serine/threonine kinase                               | Cell communication;Signal transduction                                       | S_T_kinase                    | Yes                      |
| MTA1        | 9112    | metastasis-associated protein MTA1 isoform MTA1                                  | NP_004680.2       | 4          | 2                 | 5          | 13     | 0.9                                                      | 0.95                                                     | 18.59                                                                                  | 11.53                                                                                  | 24                                                                                            | 15.5                                                                                          | 2                                                                              | 2                                                                              | 4633    | 9112           | metastasis associated 1                                                   | Transcription regulator activity                               | Nucleus                   | Transcription regulatory protein                      | Regulation of nucleobase, nucleoside, nucleotide and nucleic acid metabolism | SANT;ZNF_GAT A;BAH            | Yes                      |
| SPR         | 6697    | sepiapterin reductase                                                            | NP_003115.1       | 1          | 5                 | 5          | 11     | 0.9                                                      | 0.94                                                     | 10.37                                                                                  | 8.35                                                                                   | 23.3                                                                                          | 19.5                                                                                          | 6                                                                              | 6                                                                              | 1632    | 6697           | sepiapterin reductase (7,8-dihydrobiopterin:NADP+oxidoreductase)          | Catalytic activity                                             | -                         | Enzyme: Reductase                                     | Metabolism;Energy pathways                                                   | SP                            | Yes                      |
| MYO1B       | 4430    | unconventional myosin-Ib isoform 2                                               | NP_036355.2       | 5          | 44                | 44         | 190    | 0.9                                                      | 0.94                                                     | 2.05                                                                                   | 2.32                                                                                   | 18.1                                                                                          | 21.1                                                                                          | 94                                                                             | 92                                                                             | 8407    | 4430           | myosin IB                                                                 | Motor activity                                                 | Plasma membrane           | Motor protein                                         | Cell growth and/or maintenance                                               | MYOSIN;IQ                     | Yes                      |

Supplementary Table S1. List of quantified proteins in OKF6/TERT1-Smoke cells  
 Raigonalan *et al.*, 2017. Role of protein kinase N2 (PKN2) in cigarette smoke-mediated oncogenic transformation of oral cells

| Gene Symbol | Gene ID | Protein Description                                                | Protein Accession | # Proteins | # Unique Peptides | # Peptides | # PSMs | OKF6/TERT1-Smoke/<br>OKF6/TERT1-Parental<br>(130/126) R1 | OKF6/TERT1-Smoke/<br>OKF6/TERT1-Parental<br>(128/127) R2 | Ratio Standard Errors [%]:<br>OKF6/TERT1-Smoke/<br>OKF6/TERT1-Parental<br>(130/126) R1 | Ratio Standard Errors [%]:<br>OKF6/TERT1-Smoke/<br>OKF6/TERT1-Parental<br>(128/127) R2 | Ratio Variabilities [%]:<br>F13: OKF6/TERT1-<br>Smoke/<br>OKF6/TERT1-Parental<br>(130/126) R1 | Ratio Variabilities [%]:<br>F13: OKF6/TERT1-<br>Smoke/<br>OKF6/TERT1-Parental<br>(128/127) R2 | Ratio Counts: F13:<br>OKF6/TERT1-Smoke/<br>OKF6/TERT1-Parental<br>(130/126) R1 | Ratio Counts: F13:<br>OKF6/TERT1-Smoke/<br>OKF6/TERT1-Parental<br>(128/127) R2 | HPRD ID | Entrez Gene ID | Gene Name                                                         | Molecular Function                             | Primary Localization                                              | Molecular Class                     | Biological Process                                                                                    | Domains                  | Plasma Proteome Database |
|-------------|---------|--------------------------------------------------------------------|-------------------|------------|-------------------|------------|--------|----------------------------------------------------------|----------------------------------------------------------|----------------------------------------------------------------------------------------|----------------------------------------------------------------------------------------|-----------------------------------------------------------------------------------------------|-----------------------------------------------------------------------------------------------|--------------------------------------------------------------------------------|--------------------------------------------------------------------------------|---------|----------------|-------------------------------------------------------------------|------------------------------------------------|-------------------------------------------------------------------|-------------------------------------|-------------------------------------------------------------------------------------------------------|--------------------------|--------------------------|
| COG4        | 25839   | conserved oligomeric Golgi complex subunit 4 isoform 1             | NP_056201.2       | 2          | 5                 | 5          | 9      | 0.9                                                      | 0.93                                                     | 7.85                                                                                   | 12.91                                                                                  | 14.3                                                                                          | 24.5                                                                                          | 4                                                                              | 4                                                                              | 8444    | 25839          | component of oligomeric golgi complex 4                           | Transporter activity                           | Golgi apparatus                                                   | Transport/cargo protein             | Transport                                                                                             | CC                       | Yes                      |
| CDK2        | 1017    | cyclin-dependent kinase 2 isoform 1                                | NP_001789.2       | 49         | 3                 | 5          | 25     | 0.9                                                      | 0.93                                                     | 6.32                                                                                   | 2.45                                                                                   | 9.9                                                                                           | 3.9                                                                                           | 3                                                                              | 3                                                                              | 310     | 1017           | cyclin-dependent kinase 2                                         | Kinase activity                                | Nucleus                                                           | Cell cycle control protein          | Regulation of nucleobase, nucleotide and nucleic acid metabolism                                      | S_T_kinase               | Yes                      |
| SEH1L       | 81929   | nucleoporin SEH1 isoform 1                                         | NP_001013455.1    | 2          | 6                 | 6          | 13     | 0.9                                                      | 0.93                                                     | 8.49                                                                                   | 3.49                                                                                   | 20.4                                                                                          | 8.6                                                                                           | 7                                                                              | 7                                                                              | 15319   | 81929          | SEH1-like (S. cerevisiae)                                         | Molecular function unknown                     | Kinetochore                                                       | Unclassified                        | Biological process unknown                                                                            | WD40                     | Yes                      |
| SDC1        | 6382    | syndecan-1 precursor                                               | NP_002988.3       | 1          | 3                 | 3          | 11     | 0.9                                                      | 0.92                                                     | 5.77                                                                                   | 4.54                                                                                   | 12.8                                                                                          | 10.3                                                                                          | 6                                                                              | 6                                                                              | 1718    | 6382           | syndecan 1                                                        | Receptor activity                              | Plasma membrane                                                   | Cell surface receptor               | Cell communication;Signal transduction;Cell surface receptor linked signal transduction;Cell adhesion | SP;TM;Band 4.1           | Yes                      |
| EHHADH      | 1962    | peroxisomal bifunctional enzyme isoform 1                          | NP_001957.2       | 2          | 3                 | 3          | 5      | 0.9                                                      | 0.92                                                     | 17.15                                                                                  | 6.46                                                                                   | 27.3                                                                                          | 10.3                                                                                          | 3                                                                              | 3                                                                              | 6125    | 1962           | enoyl-Coenzyme A hydratase/3-hydroxyacyl-Coenzyme A dehydrogenase | Catalytic activity                             | Peroxisome                                                        | Enzyme                              | Metabolism;Energy pathways                                                                            | -                        | Yes                      |
| SH3GLB1     | 51100   | endophilin-B1 isoform 1                                            | NP_057093.1       | 4          | 5                 | 6          | 6      | 0.9                                                      | 0.91                                                     | 12.89                                                                                  | 13.18                                                                                  | 26.5                                                                                          | 27.2                                                                                          | 5                                                                              | 5                                                                              | 15333   | 51100          | SH3-domain GRB2-like endophilin B1                                | Acyltransferase activity                       | Cytoplasm                                                         | Enzyme: Acyltransferase             | Metabolism;Energy pathways                                                                            | SH3;CC                   | Yes                      |
| TBCD        | 6904    | tubulin-specific chaperone D                                       | NP_005984.3       | 1          | 16                | 16         | 31     | 0.9                                                      | 0.91                                                     | 8.92                                                                                   | 4.94                                                                                   | 30.8                                                                                          | 16.9                                                                                          | 14                                                                             | 14                                                                             | 5227    | 6904           | tubulin-specific chaperone d                                      | Chaperone activity                             | Microtubule                                                       | Chaperone                           | Protein metabolism;Protein folding                                                                    | HEAT                     | No                       |
| UBR3        | 130507  | E3 ubiquitin-protein ligase UBR3                                   | NP_742067.3       | 1          | 2                 | 2          | 2      | 0.9                                                      | 0.9                                                      | 0.9                                                                                    | 0.9                                                                                    | 0.9                                                                                           | 0.9                                                                                           | 1                                                                              | 1                                                                              | 15887   | 130507         | zinc finger protein 650                                           | Molecular function unknown                     | -                                                                 | Unclassified                        | Biological process unknown                                                                            | CC;ZPC3                  | Yes                      |
| PC          | 5091    | pyruvate carboxylase, mitochondrial precursor                      | NP_071504.2       | 1          | 30                | 30         | 82     | 0.9                                                      | 0.89                                                     | 2.84                                                                                   | 5.31                                                                                   | 16.8                                                                                          | 31.7                                                                                          | 43                                                                             | 43                                                                             | 2032    | 5091           | pyruvate carboxylase                                              | Ligase activity                                | Mitochondrion                                                     | Enzyme: Carboxylase                 | Metabolism;Energy pathways                                                                            | SP                       | Yes                      |
| FDXR        | 2232    | NADPH:ferredoxin oxidoreductase, mitochondrial isoform 3 precursor | NP_001244941.2    | 7          | 9                 | 9          | 19     | 0.9                                                      | 0.88                                                     | 3.51                                                                                   | 6.58                                                                                   | 10.5                                                                                          | 19.4                                                                                          | 11                                                                             | 11                                                                             | 60      | 2232           | ferredoxin reductase                                              | Oxidoreductase activity                        | Mitochondrion                                                     | Enzyme: Oxidoreductase              | Metabolism;Energy pathways                                                                            | SP                       | Yes                      |
| MYO1E       | 4643    | unconventional myosin-Ie                                           | NP_004989.2       | 1          | 22                | 22         | 50     | 0.9                                                      | 0.87                                                     | 4.74                                                                                   | 7.01                                                                                   | 21.1                                                                                          | 30.6                                                                                          | 24                                                                             | 24                                                                             | 3281    | 4643           | myosin Ie                                                         | Motor activity                                 | Cytoplasm                                                         | Motor protein                       | Cell growth and/or maintenance                                                                        | MYOSIN;SH3;IQ            | Yes                      |
| MRPL28      | 10573   | 39S ribosomal protein L28, mitochondrial                           | NP_006419.2       | 1          | 3                 | 3          | 6      | 0.9                                                      | 0.87                                                     | 20.14                                                                                  | 10.68                                                                                  | 42.4                                                                                          | 21.1                                                                                          | 5                                                                              | 5                                                                              | 6889    | 10573          | mitochondrial ribosomal protein L28                               | Structural molecule activity;Ribonucleoprotein | Mitochondrion                                                     | Structural protein                  | Protein metabolism;RNA metabolism                                                                     | -                        | Yes                      |
| STAG2       | 10735   | cohesin subunit SA-2 isoform a                                     | NP_001036214.1    | 2          | 2                 | 3          | 5      | 0.9                                                      | 0.87                                                     | 9.32                                                                                   | 2.21                                                                                   | 11.9                                                                                          | 2.7                                                                                           | 2                                                                              | 2                                                                              | 5077    | 10735          | stromal antigen 2                                                 | Molecular function unknown                     | Nucleus                                                           | Cell cycle control protein          | Cell growth and/or maintenance                                                                        | CC                       | Yes                      |
| SSFA2       | 6744    | sperm-specific antigen 2 isoform 1                                 | NP_001123917.1    | 5          | 5                 | 5          | 9      | 0.9                                                      | 0.86                                                     | 6.86                                                                                   | 10.53                                                                                  | 13.8                                                                                          | 20.4                                                                                          | 5                                                                              | 5                                                                              | 353     | 6744           | sperm specific antigen 2                                          | Molecular function unknown                     | Plasma membrane                                                   | Unclassified                        | Biological process unknown                                                                            | CC                       | Yes                      |
| TMEM43      | 79188   | transmembrane protein 43                                           | NP_077310.1       | 1          | 14                | 14         | 34     | 0.9                                                      | 0.86                                                     | 5.7                                                                                    | 6.16                                                                                   | 22.6                                                                                          | 23.3                                                                                          | 19                                                                             | 19                                                                             | 15541   | 79188          | transmembrane protein 43                                          | Molecular function unknown                     | Integral to membrane                                              | Integral membrane protein           | Biological process unknown                                                                            | TM                       | Yes                      |
| ATXN10      | 25814   | ataxin-10 isoform 1                                                | NP_037368.1       | 3          | 10                | 11         | 30     | 0.9                                                      | 0.86                                                     | 5.22                                                                                   | 10.38                                                                                  | 17.7                                                                                          | 34.4                                                                                          | 14                                                                             | 14                                                                             | 4624    | 25814          | None                                                              | Molecular function unknown                     | -                                                                 | Unclassified                        | Biological process unknown                                                                            | -                        | Yes                      |
| OGDH        | 4967    | 2-oxoglutarate dehydrogenase, mitochondrial isoform 1 precursor    | NP_002532.2       | 6          | 21                | 21         | 59     | 0.9                                                      | 0.86                                                     | 5.67                                                                                   | 7.21                                                                                   | 29                                                                                            | 35.5                                                                                          | 31                                                                             | 31                                                                             | 8938    | 4967           | oxoglutarate (alpha-ketoglutarate) dehydrogenase(lip coamide)     | Catalytic activity                             | Mitochondrion                                                     | Enzyme: Dehydrogenase               | Metabolism;Energy pathways                                                                            | -                        | Yes                      |
| MTPN        | 136319  | myotrophin                                                         | NP_665807.1       | 1          | 2                 | 2          | 8      | 0.9                                                      | 0.85                                                     | 2.31                                                                                   | 8.72                                                                                   | 4.2                                                                                           | 14.8                                                                                          | 4                                                                              | 4                                                                              | 7574    | 136319         | myotrophin                                                        | Protein binding                                | Cytoplasm                                                         | Cell cycle control protein          | Protein metabolism                                                                                    | ANKLNLS;NES              | Yes                      |
| DLG1        | 1739    | discs large homolog 1 isoform 2                                    | NP_004078.2       | 11         | 10                | 10         | 19     | 0.9                                                      | 0.84                                                     | 8.58                                                                                   | 8.18                                                                                   | 27.1                                                                                          | 24.2                                                                                          | 12                                                                             | 12                                                                             | 3007    | 1739           | discs, large homolog 1 (Drosophila)                               | Cell adhesion molecule activity                | Plasma membrane;Nucleus;Cytoplasm;Membrane fraction;Cell junction | Cell junction protein               | Cell communication;Signal transduction                                                                | PDZ;SH3;GukKinase;CC;L27 | Yes                      |
| TP63        | 8626    | tumor protein 63 isoform 1                                         | NP_003713.3       | 19         | 8                 | 8          | 16     | 0.9                                                      | 0.84                                                     | 9.19                                                                                   | 14.97                                                                                  | 25.2                                                                                          | 39.1                                                                                          | 9                                                                              | 9                                                                              | 4469    | 8626           | tumor protein p73-like                                            | Transcription factor activity                  | Nucleus                                                           | Transcription factor                | Regulation of nucleobase, nucleotide and nucleic acid metabolism                                      | SAM                      | Yes                      |
| SPTBN1      | 6711    | spectrin beta chain, non-erythrocytic 1 isoform 1                  | NP_003119.2       | 4          | 8                 | 81         | 245    | 0.9                                                      | 0.84                                                     | 5.01                                                                                   | 4.93                                                                                   | 17.6                                                                                          | 16.2                                                                                          | 15                                                                             | 15                                                                             | 1683    | 6711           | spectrin, beta, non-erythrocytic 1                                | Structural constituent of cytoskeleton         | Cytoskeleton                                                      | Cytoskeletal protein                | Cell growth and/or maintenance                                                                        | SPECTRIN;CC;P;H;CH       | Yes                      |
| GLRX5       | 51218   | glutaredoxin-related protein 5, mitochondrial precursor            | NP_057501.2       | 1          | 1                 | 1          | 1      | 0.9                                                      | 0.83                                                     | 0.83                                                                                   | 0.83                                                                                   | 0.83                                                                                          | 0.83                                                                                          | 1                                                                              | 1                                                                              | 12659   | 51218          | chromosome 14 open reading frame 87                               | Oxidoreductase activity                        | Mitochondrion                                                     | Enzyme: Oxidoreductase              | Metabolism;Energy pathways                                                                            | -                        | Yes                      |
| RPS4X       | 6191    | 40S ribosomal protein S4, X isoform X1 isoform                     | NP_000998.1       | 3          | 18                | 18         | 91     | 0.9                                                      | 0.83                                                     | 5.22                                                                                   | 8.08                                                                                   | 33.5                                                                                          | 49.4                                                                                          | 48                                                                             | 48                                                                             | 2427    | 6191           | ribosomal protein S4, X-linked                                    | Structural constituent of ribosome             | Ribosome                                                          | Ribosomal subunit                   | Protein metabolism                                                                                    | KOW                      | Yes                      |
| DOCK5       | 80005   | dedicator of cytokinesis protein 5                                 | NP_079216.4       | 1          | 11                | 12         | 19     | 0.9                                                      | 0.82                                                     | 8.95                                                                                   | 4.18                                                                                   | 27.1                                                                                          | 11.4                                                                                          | 11                                                                             | 11                                                                             | 9925    | 80005          | dedicator of cytokinesis 5                                        | Molecular function unknown                     | -                                                                 | Unclassified                        | Cell communication;Signal transduction                                                                | SH3                      | Yes                      |
| H2AFY2      | 55506   | core histone macro-H2A.2                                           | NP_061119.1       | 1          | 9                 | 11         | 40     | 0.9                                                      | 0.82                                                     | 7.62                                                                                   | 4.41                                                                                   | 29                                                                                            | 15                                                                                            | 17                                                                             | 17                                                                             | 13625   | 55506          | H2A histone family, member Y2                                     | DNA binding                                    | Nucleus                                                           | DNA binding protein                 | Regulation of nucleobase, nucleotide and nucleic acid metabolism                                      | H2A-A1pp                 | Yes                      |
| MAGT1       | 84061   | magnesium transporter protein 1                                    | NP_115497.4       | 1          | 3                 | 3          | 4      | 0.9                                                      | 0.81                                                     | 7.16                                                                                   | 6.87                                                                                   | 11.2                                                                                          | 9.6                                                                                           | 3                                                                              | 3                                                                              | 6487    | 84061          | None                                                              | Molecular function unknown                     | -                                                                 | Unclassified                        | Biological process unknown                                                                            | SP;TM                    | No                       |
| SUMO3       | 6612    | small ubiquitin-related modifier 3 isoform 2                       | NP_001273345.1    | 2          | 1                 | 2          | 7      | 0.9                                                      | 0.81                                                     | 0.81                                                                                   | 0.81                                                                                   | 0.81                                                                                          | 0.81                                                                                          | 1                                                                              | 1                                                                              | 3754    | 6612           | SMT3 suppressor of mit two 3 homolog 3 (yeast)                    | Ubiquitin-specific protease activity           | Cytoplasm;Nucleus                                                 | Ubiquitin proteasome system protein | Protein metabolism                                                                                    | UBQ                      | Yes                      |



Supplementary Table S1. List of quantified proteins in OKF6/TERT1-Smoke cells  
 Raignanalan *et al.*, 2017. Role of protein kinase N2 (PKN2) in cigarette smoke-mediated oncogenic transformation of oral cells

| Gene Symbol | Gene ID | Protein Description                                                | Protein Accession | # Proteins | # Unique Peptides | # Peptides | # PSMs | OKF6/TERT1-Smoke/<br>OKF6/TERT1-Parental<br>(130/126) R1 | OKF6/TERT1-Smoke/<br>OKF6/TERT1-Parental<br>(128/127) R2 | Ratio Standard Errors [%]:<br>OKF6/TERT1-Smoke/<br>OKF6/TERT1-Parental<br>(130/126) R1 | Ratio Standard Errors [%]:<br>OKF6/TERT1-Smoke/<br>OKF6/TERT1-Parental<br>(128/127) R2 | Ratio Variabilities [%]:<br>F13: OKF6/TERT1-<br>Smoke/<br>OKF6/TERT1-Parental<br>(130/126) R1 | Ratio Variabilities [%]:<br>F13: OKF6/TERT1-<br>Smoke/<br>OKF6/TERT1-Parental<br>(128/127) R2 | Ratio Counts: F13:<br>OKF6/TERT1-Smoke/<br>OKF6/TERT1-Parental<br>(130/126) R1 | Ratio Counts: F13:<br>OKF6/TERT1-Smoke/<br>OKF6/TERT1-Parental<br>(128/127) R2 | HPRD ID | Entrez Gene ID | Gene Name                                                                         | Molecular Function                                                    | Primary Localization | Molecular Class                     | Biological Process                                                           | Domains                 | Plasma Proteome Database |  |
|-------------|---------|--------------------------------------------------------------------|-------------------|------------|-------------------|------------|--------|----------------------------------------------------------|----------------------------------------------------------|----------------------------------------------------------------------------------------|----------------------------------------------------------------------------------------|-----------------------------------------------------------------------------------------------|-----------------------------------------------------------------------------------------------|--------------------------------------------------------------------------------|--------------------------------------------------------------------------------|---------|----------------|-----------------------------------------------------------------------------------|-----------------------------------------------------------------------|----------------------|-------------------------------------|------------------------------------------------------------------------------|-------------------------|--------------------------|--|
| EXOSC1      | 51013   | exosome complex component CSL4                                     | NP_057130.1       | 1          | 4                 | 4          | 7      | 0.89                                                     | 1.21                                                     | 2.35                                                                                   | 1.55                                                                                   | 3.6                                                                                           | 3.3                                                                                           | 3                                                                              | 3                                                                              | 16223   | 51013          | exosome component 1                                                               | Ribonuclease activity                                                 | Nucleus              | Ribonuclease                        | Regulation of nucleobase, nucleoside, nucleotide and nucleic acid metabolism | S1                      | Yes                      |  |
| SSR3        | 6747    | translocin-associated protein subunit gamma isoform 1              | NP_001295126.1    | 2          | 1                 | 1          | 2      | 0.89                                                     | 1.21                                                     |                                                                                        |                                                                                        |                                                                                               |                                                                                               | 1                                                                              | 1                                                                              | 16206   | 6747           | signal sequence receptor, gamma/translocin-associated protein gamma               | Auxiliary transport protein activity                                  | Microsome            | Membrane transport protein          | Transport                                                                    | TM                      | Yes                      |  |
| ARHGEF7     | 8874    | rho guanine nucleotide exchange factor 7 isoform c                 | NP_001106983.1    | 4          | 2                 | 2          | 4      | 0.89                                                     | 1.21                                                     | 8.16                                                                                   | 4.5                                                                                    | 10.3                                                                                          | 7.7                                                                                           | 2                                                                              | 2                                                                              | 5688    | 8874           | Rho guanine nucleotide exchange factor (GEF7)                                     | Guanyl-nucleotide exchange factor activity;Molecular function unknown | Cytoplasm            | Guanine nucleotide exchange factor  | Cell communication;Signal transduction;Regulation of signal transduction     | CH,SH3,RHOGEF,PH,CC,NLS | Yes                      |  |
| NOP9        | 161424  | nucleolar protein 9 isoform 1                                      | NP_777573.1       | 2          | 2                 | 2          | 5      | 0.89                                                     | 1.17                                                     | 11.92                                                                                  | 4.53                                                                                   | 15                                                                                            | 7.5                                                                                           | 2                                                                              | 2                                                                              |         |                |                                                                                   |                                                                       |                      |                                     |                                                                              |                         |                          |  |
| ACY1        | 95      | aminocyclase-1 isoform a                                           | NP_000657.1       | 4          | 7                 | 7          | 17     | 0.89                                                     | 1.16                                                     | 8.69                                                                                   | 7.49                                                                                   | 25                                                                                            | 28                                                                                            | 10                                                                             | 10                                                                             | 92      | 95             | aminocyclase 1                                                                    | Hydrolase activity                                                    | Cytoplasm            | Enzyme: Hydrolase                   | Metabolism;Energy pathways                                                   | -                       | Yes                      |  |
| CTTNBP2NL   | 55917   | CTTNBP2 N-terminal-like protein                                    | NP_061174.1       | 1          | 1                 | 1          | 2      | 0.89                                                     | 1.16                                                     |                                                                                        |                                                                                        |                                                                                               |                                                                                               | 1                                                                              | 1                                                                              | 10906   | 55917          | None                                                                              | Molecular function unknown                                            | -                    | Unclassified                        | Biological process unknown                                                   | CC                      | No                       |  |
| GLRX3       | 10539   | glutaredoxin-3                                                     | NP_001186797.1    | 1          | 11                | 11         | 27     | 0.89                                                     | 1.16                                                     | 8.76                                                                                   | 7.11                                                                                   | 29.7                                                                                          | 31.6                                                                                          | 14                                                                             | 14                                                                             | 10153   | 10539          | thioredoxin-like 2                                                                | Molecular function unknown                                            | Cytoplasm            | Unclassified                        | Biological process unknown                                                   | -                       | Yes                      |  |
| MKNK1       | 8569    | MAP kinase-interacting serine/threonine-protein kinase 1 isoform 1 | NP_003675.2       | 3          | 1                 | 1          | 2      | 0.89                                                     | 1.12                                                     |                                                                                        |                                                                                        |                                                                                               |                                                                                               | 1                                                                              | 1                                                                              | 9468    | 8569           | MAP kinase interacting serine/threonine kinase1                                   | ATP binding;Protein serine/threonine kinase activity                  | Cytoplasm;Nucleus    | Serine/threonine kinase             | Apoptosis;Regulation of transcription;Cell communication;Signal transduction | S,T_kinase;NLS;NES      | Yes                      |  |
| Clorf27     | 54953   | protein odr-4 homolog isoform 1                                    | NP_060317.3       | 3          | 8                 | 8          | 15     | 0.89                                                     | 1.11                                                     | 5.35                                                                                   | 7.54                                                                                   | 13.6                                                                                          | 24.1                                                                                          | 8                                                                              | 8                                                                              | 12723   | 54953          | chromosome 1 open reading frame 27                                                | Molecular function unknown                                            | Integral to membrane | Unclassified                        | Biological process unknown                                                   | TM                      | No                       |  |
| AGTRAP      | 57085   | type-1 angiotensin II receptor-associated protein isoform a        | NP_065083.3       | 2          | 2                 | 2          | 13     | 0.89                                                     | 1.11                                                     | 6.07                                                                                   | 6.85                                                                                   | 15.3                                                                                          | 21.8                                                                                          | 8                                                                              | 8                                                                              | 16379   | 57085          | angiotensin II receptor associated protein                                        | Molecular function unknown                                            | Integral to membrane | Unclassified                        | Biological process unknown                                                   | SP;TM                   | No                       |  |
| NCKIPSD     | 51517   | NCK-interacting protein with SH3 domain isoform 1                  | NP_057537.1       | 2          | 1                 | 1          | 2      | 0.89                                                     | 1.1                                                      |                                                                                        |                                                                                        |                                                                                               |                                                                                               | 1                                                                              | 1                                                                              | 9450    | 51517          | NCK interacting protein with SH3 domain                                           | Receptor signaling complex scaffold activity                          | Nucleus              | Adapter molecule                    | Cell communication;Signal transduction                                       | SH3;NLS                 | Yes                      |  |
| MX1         | 4599    | interferon-induced GTP-binding protein Mx1 isoform a               | NP_001138397.1    | 2          | 31                | 35         | 141    | 0.89                                                     | 1.06                                                     | 4.13                                                                                   | 3.57                                                                                   | 29.2                                                                                          | 30.7                                                                                          | 61                                                                             | 62                                                                             | 919     | 4599           | myxovirus (influenza virus) resistance 1;interferon-inducible protein p78 (mouse) | GTPase activity                                                       | Cytoplasm            | GTPase                              | Cell communication;Signal transduction                                       | CC;GD;DYNC              | Yes                      |  |
| SRC         | 6714    | proto-oncogene tyrosine-protein kinase Src                         | NP_005408.1       | 1          | 6                 | 9          | 17     | 0.89                                                     | 1.04                                                     | 3.98                                                                                   | 7.09                                                                                   | 8.7                                                                                           | 18.2                                                                                          | 6                                                                              | 6                                                                              | 1819    | 6714           | v-src sarcoma (Schmidt-Ruppin A-2) viral oncogene homolog (avian)                 | Protein-tyrosine kinase activity                                      | Cytoplasm            | Tyrosine kinase                     | Signal transduction                                                          | SH3;SH2;Tyr_Kinase      | Yes                      |  |
| PDPK1       | 5170    | 3-phosphoinositide-dependent protein kinase 1 isoform 1            | NP_002604.1       | 2          | 1                 | 1          | 2      | 0.89                                                     | 1.03                                                     |                                                                                        |                                                                                        |                                                                                               |                                                                                               | 1                                                                              | 1                                                                              | 5556    | 5170           | 3-phosphoinositide dependent protein kinase-1                                     | Protein serine/threonine kinase activity                              | Cytoplasm;Nucleus    | Serine/threonine kinase             | Signal transduction                                                          | S,T_kinase;S,T_V_Kinase | Yes                      |  |
| CDC16       | 8881    | cell division cycle protein 16 homolog                             | NP_003894.3       | 1          | 5                 | 5          | 8      | 0.89                                                     | 1.03                                                     | 15.56                                                                                  | 7.64                                                                                   | 31.7                                                                                          | 17.7                                                                                          | 5                                                                              | 5                                                                              | 4587    | 8881           | CDC16 cell division cycle 16 homolog (S.cerevisiae)                               | Protein binding                                                       | Centrosome           | Cell cycle control protein          | Cell communication;Signal transduction                                       | TFR                     | Yes                      |  |
| ASL         | 435     | argininosuccinate lyase isoform 1                                  | NP_001020114.1    | 3          | 5                 | 5          | 12     | 0.89                                                     | 1.03                                                     | 14.94                                                                                  | 18.58                                                                                  | 33.5                                                                                          | 49.5                                                                                          | 6                                                                              | 6                                                                              | 1948    | 435            | argininosuccinate lyase                                                           | Lyase activity                                                        | -                    | Enzyme: Lyase                       | Metabolism;Energy pathways                                                   | -                       | Yes                      |  |
| CTPS2       | 56474   | CTP synthase 2                                                     | NP_001137474.1    | 1          | 5                 | 7          | 12     | 0.89                                                     | 1.01                                                     | 12.87                                                                                  | 5.3                                                                                    | 28.6                                                                                          | 13.2                                                                                          | 6                                                                              | 6                                                                              | 2305    | 56474          | CTP synthase II                                                                   | Ligase activity                                                       | -                    | Enzyme: Synthase;Enzyme: Ligase     | Regulation of nucleobase, nucleoside, nucleotide and nucleic acid metabolism | -                       | No                       |  |
| MTMR6       | 9107    | myotubularin-related protein 6                                     | NP_004676.3       | 1          | 2                 | 2          | 3      | 0.89                                                     | 1                                                        | 9.8                                                                                    | 3.29                                                                                   | 12.4                                                                                          | 4.6                                                                                           | 2                                                                              | 2                                                                              | 11946   | 9107           | myotubularin related protein 6                                                    | Lipid phosphatase activity                                            | Cytoplasm            | Lipid phosphatase                   | Cell communication;Signal transduction                                       | CC                      | Yes                      |  |
| RARS        | 5917    | arginine--tRNA ligase, cytoplasmic                                 | NP_002878.2       | 1          | 33                | 33         | 128    | 0.89                                                     | 0.99                                                     | 4.15                                                                                   | 3.15                                                                                   | 30.8                                                                                          | 25.8                                                                                          | 66                                                                             | 66                                                                             | 142     | 5917           | arginyl-tRNA synthetase                                                           | Ligase activity                                                       | Cytoplasm            | Enzyme: Ligase                      | Protein metabolism                                                           | CC                      | Yes                      |  |
| LCN2        | 3934    | neutrophil gelatinase-associated lipocalin precursor               | NP_005555.2       | 1          | 2                 | 2          | 3      | 0.89                                                     | 0.98                                                     | 16.05                                                                                  | 34.58                                                                                  | 20.5                                                                                          | 50.9                                                                                          | 2                                                                              | 2                                                                              | 2551    | 3934           | lipocalin 2 (oncogene 24p3)                                                       | Transporter activity                                                  | Extracellular        | Transport/cargo protein             | Transport                                                                    | SP                      | Yes                      |  |
| VPS39       | 23339   | vam6/Vps39-like protein isoform a                                  | NP_001288067.1    | 2          | 1                 | 1          | 1      | 0.89                                                     | 0.98                                                     |                                                                                        |                                                                                        |                                                                                               |                                                                                               | 1                                                                              | 1                                                                              | 10300   | 23339          | vacuolar protein sorting 39 (yeast)                                               | Transporter activity                                                  | Lysosome             | Transport/cargo protein             | Transport                                                                    | CNH                     | Yes                      |  |
| SYNJ1       | 8867    | synaptotagmin-1 isoform a                                          | NP_003886.3       | 4          | 1                 | 1          | 1      | 0.89                                                     | 0.98                                                     |                                                                                        |                                                                                        |                                                                                               |                                                                                               | 1                                                                              | 1                                                                              | 9182    | 8867           | synaptotagmin 1                                                                   | Hydrolase activity                                                    | Synaptic vesicle     | Enzyme: Phosphatase                 | Metabolism                                                                   | I.Phosphatase;RRM       | Yes                      |  |
| ACTR10      | 55860   | actin-related protein 10                                           | NP_060947.1       | 2          | 6                 | 6          | 16     | 0.89                                                     | 0.96                                                     | 11.51                                                                                  | 10.75                                                                                  | 29.5                                                                                          | 29.8                                                                                          | 8                                                                              | 8                                                                              | 12420   | 55860          | actin-related protein 10 homolog (S.cerevisiae)                                   | Cytoskeletal protein binding                                          | Cytoskeleton         | Cytoskeletal associated protein     | Cell growth and/or maintenance                                               | ACTIN                   | Yes                      |  |
| MRPL4       | 51073   | 39S ribosomal protein L4, mitochondrial isoform a                  | NP_666499.1       | 2          | 8                 | 8          | 19     | 0.89                                                     | 0.95                                                     | 3.68                                                                                   | 5.01                                                                                   | 9.9                                                                                           | 14.4                                                                                          | 9                                                                              | 9                                                                              | 14759   | 51073          | mitochondrial ribosomal protein L4                                                | Structural constituent of ribosome                                    | Mitochondrion        | Ribosomal subunit                   | Protein metabolism                                                           | -                       | No                       |  |
| UBEZ2       | 65264   | ubiquitin-conjugating enzyme E2 Z                                  | NP_075567.2       | 1          | 2                 | 2          | 2      | 0.89                                                     | 0.95                                                     | 21.57                                                                                  | 57.44                                                                                  | 27.5                                                                                          | 89.9                                                                                          | 2                                                                              | 2                                                                              | 8589    | 65264          | None                                                                              | Ubiquitin-specific protease activity                                  | -                    | Ubiquitin proteasome system protein | Protein metabolism                                                           | UBC                     | No                       |  |
| ENOPH1      | 58478   | enolase-phosphatase E1 isoform 1                                   | NP_067027.1       | 2          | 5                 | 5          | 7      | 0.89                                                     | 0.95                                                     | 8.59                                                                                   | 16.82                                                                                  | 17.1                                                                                          | 37                                                                                            | 5                                                                              | 5                                                                              | 17467   | 58478          | None                                                                              | Molecular function unknown                                            | -                    | Unclassified                        | Biological process unknown                                                   | -                       | No                       |  |
| RABGAP1     | 23637   | rab GTPase-activating protein 1                                    | NP_036329.3       | 1          | 9                 | 10         | 17     | 0.89                                                     | 0.94                                                     | 6.33                                                                                   | 10.89                                                                                  | 16                                                                                            | 29.6                                                                                          | 8                                                                              | 8                                                                              | 6575    | 23637          | RAB GTPase activating protein 1                                                   | GTPase activator activity                                             | Cytoplasm            | GTPase activating protein           | Cell communication;Signal transduction                                       | PTB;CC                  | No                       |  |
| HUWE1       | 10075   | E3 ubiquitin-protein ligase HUWE1                                  | NP_113584.3       | 1          | 38                | 38         | 73     | 0.89                                                     | 0.94                                                     | 3.83                                                                                   | 4.26                                                                                   | 20.3                                                                                          | 24                                                                                            | 35                                                                             | 35                                                                             | 6608    | 10075          | HECT, UBA and WWE domain containing 1                                             | DNA binding                                                           | Nucleus              | DNA binding protein                 | Regulation of nucleobase, nucleoside, nucleotide and nucleic acid metabolism | UBA;CC;HECT;WWE;UM      | Yes                      |  |

Supplementary Table S1. List of quantified proteins in OKF6/TERT1-Smoke cells  
 Raingopaln *et al.*, 2017. Role of protein kinase N2 (PKN2) in cigarette smoke-mediated oncogenic transformation of oral cells

| Gene Symbol | Gene ID | Protein Description                                                                         | Protein Accession | # Proteins | # Unique Peptides | # Peptides | # PSMs | OKF6/TERT1-Smoke/<br>OKF6/TERT1-Parental<br>(130/126) R1 | OKF6/TERT1-Smoke/<br>OKF6/TERT1-Parental<br>(128/127) R2 | Ratio Standard Errors [%]:<br>OKF6/TERT1-Smoke/<br>OKF6/TERT1-Parental<br>(130/126) R1 | Ratio Standard Errors [%]:<br>OKF6/TERT1-Smoke/<br>OKF6/TERT1-Parental<br>(128/127) R2 | Ratio Variabilities [%]:<br>F13: OKF6/TERT1-<br>Smoke/<br>OKF6/TERT1-Parental<br>(130/126) R1 | Ratio Variabilities [%]:<br>F13: OKF6/TERT1-<br>Smoke/<br>OKF6/TERT1-Parental<br>(128/127) R2 | Ratio Counts: F13:<br>OKF6/TERT1-Smoke/<br>OKF6/TERT1-Parental<br>(130/126) R1 | Ratio Counts: F13:<br>OKF6/TERT1-Smoke/<br>OKF6/TERT1-Parental<br>(128/127) R2 | HPRD ID | Entrez Gene ID | Gene Name                                                                                                            | Molecular Function                                      | Primary Localization                    | Molecular Class                              | Biological Process                                                            | Domains             | Plasma Proteome Database |
|-------------|---------|---------------------------------------------------------------------------------------------|-------------------|------------|-------------------|------------|--------|----------------------------------------------------------|----------------------------------------------------------|----------------------------------------------------------------------------------------|----------------------------------------------------------------------------------------|-----------------------------------------------------------------------------------------------|-----------------------------------------------------------------------------------------------|--------------------------------------------------------------------------------|--------------------------------------------------------------------------------|---------|----------------|----------------------------------------------------------------------------------------------------------------------|---------------------------------------------------------|-----------------------------------------|----------------------------------------------|-------------------------------------------------------------------------------|---------------------|--------------------------|
| TRIM47      | 91107   | tripartite motif-containing protein 47                                                      | NP_258411.2       | 1          | 5                 | 5          | 8      | 0.89                                                     | 0.93                                                     | 7.49                                                                                   | 11.68                                                                                  | 15                                                                                            | 24.6                                                                                          | 5                                                                              | 5                                                                              | 15564   | 91107          | tripartite motif-containing 47                                                                                       | Transcription regulator activity                        | Nucleus                                 | Transcription regulatory protein             | Regulation of nucleobase, nucleoside, nucleotide and nucleic acid metabolism  | RING,BBOX;PRY,SPRY  | Yes                      |
| ETFDH       | 2110    | electron transfer flavoprotein-ubiquinone oxidoreductase, mitochondrial isoform 1 precursor | NP_004444.2       | 3          | 2                 | 2          | 5      | 0.89                                                     | 0.92                                                     | 12.04                                                                                  | 12.2                                                                                   | 15.2                                                                                          | 16                                                                                            | 2                                                                              | 2                                                                              | 1978    | 2110           | electron-transferring-flavoprotein:ubiquinone dehydrogenase                                                          | Oxidoreductase activity                                 | Mitochondrion                           | Enzyme: Oxidoreductase                       | Metabolism;Energy pathways                                                    | -                   | Yes                      |
| CDKN2AIP    | 55602   | CDKN2A-interacting protein                                                                  | NP_060102.1       | 1          | 7                 | 7          | 13     | 0.89                                                     | 0.91                                                     | 2.47                                                                                   | 6.99                                                                                   | 5.8                                                                                           | 16.9                                                                                          | 7                                                                              | 7                                                                              | 16683   | 55602          | None                                                                                                                 | RNA binding                                             | Nucleus                                 | RNA binding protein                          | Regulation of nucleobase, nucleoside, nucleotide and nucleic acid metabolism  | DSRM                | No                       |
| XRN1        | 54464   | 5'-3' exoribonuclease 1 isoform a                                                           | NP_061874.3       | 2          | 3                 | 3          | 6      | 0.89                                                     | 0.9                                                      | 5.71                                                                                   | 7.95                                                                                   | 10.1                                                                                          | 14.4                                                                                          | 4                                                                              | 4                                                                              | 10470   | 54464          | 5'-3' exoribonuclease 1                                                                                              | Ribonuclease activity                                   | Cytoplasm                               | Ribonuclease                                 | Regulation of nucleobase, nucleoside, nucleotide and nucleic acid metabolism  | -                   | No                       |
| CNP         | 1267    | 2',3'-cyclic-nucleotide 3'-phosphodiesterase                                                | NP_149124.3       | 1          | 5                 | 6          | 14     | 0.89                                                     | 0.9                                                      | 5.01                                                                                   | 16.15                                                                                  | 10                                                                                            | 33.2                                                                                          | 5                                                                              | 5                                                                              | 448     | 1267           | 2',3'-cyclic nucleotide 3' phosphodiesterase                                                                         | Phosphoric diester hydrolase activity                   | Cytoplasm                               | Enzyme: Phosphodiesterase                    | Metabolism;Energy pathways                                                    | -                   | Yes                      |
| WNK1        | 65125   | serine/threonine-protein kinase WNK1 isoform 4                                              | NP_001171914.1    | 4          | 4                 | 4          | 6      | 0.89                                                     | 0.9                                                      | 6.1                                                                                    | 6.65                                                                                   | 10.9                                                                                          | 12.1                                                                                          | 4                                                                              | 4                                                                              | 5570    | 65125          | WNK lysine deficient protein kinase 1                                                                                | Protein serine/threonine kinase activity                | Cytoplasm                               | Serine/threonine kinase                      | Cell communication;Signal transduction                                        | S_T_kinase;CC       | Yes                      |
| DNMT1       | 1786    | DNA (cytosine-5)-methyltransferase 1 isoform a                                              | NP_001124295.1    | 2          | 3                 | 3          | 5      | 0.89                                                     | 0.89                                                     | 0.69                                                                                   | 23.7                                                                                   | 1.1                                                                                           | 37.9                                                                                          | 3                                                                              | 3                                                                              | 532     | 1786           | DNA (cytosine-5)-methyltransferase 1                                                                                 | DNA-methyltransferase activity                          | Nucleus                                 | DNA methyltransferase                        | Regulation of nucleobase, nucleoside, nucleotide and nucleic acid metabolism  | BAH                 | Yes                      |
| GDA         | 9615    | guanine deaminase isoform b                                                                 | NP_004284.1       | 2          | 1                 | 18         | 48     | 0.89                                                     | 0.88                                                     | 0.88                                                                                   | 0.88                                                                                   | 0.88                                                                                          | 0.88                                                                                          | 1                                                                              | 1                                                                              | 8849    | 9615           | guanine deaminase                                                                                                    | Deaminase activity                                      | Cytoplasm                               | Enzyme: Deaminase                            | Metabolism;Energy pathways                                                    | -                   | Yes                      |
| ATP2A2      | 488     | sarcoplasmic/endoplasmic reticulum calcium ATPase 2 isoform b                               | NP_733765.1       | 11         | 38                | 38         | 165    | 0.89                                                     | 0.88                                                     | 3.52                                                                                   | 4.76                                                                                   | 29.1                                                                                          | 39.6                                                                                          | 83                                                                             | 83                                                                             | 161     | 488            | ATPase, Ca++ transporting, cardiac muscle,slow twitch 2                                                              | Auxiliary transport protein activity                    | Endoplasmic reticulum;Nucleus;Cytoplasm | Membrane transport protein                   | Transport                                                                     | TM                  | Yes                      |
| NMT1        | 4836    | glycylpeptide N-tetradecanoyltransferase 1                                                  | NP_066565.1       | 1          | 7                 | 10         | 32     | 0.89                                                     | 0.88                                                     | 3.94                                                                                   | 4.31                                                                                   | 12.6                                                                                          | 13.8                                                                                          | 13                                                                             | 13                                                                             | 1187    | 4836           | N-myristoyltransferase 1                                                                                             | Molecular function unknown;Acyltransferase activity     | Ribosome                                | Enzyme: Acyltransferase;Unclassified         | Metabolism;Energy pathways;Protein metabolism                                 | -                   | Yes                      |
| DNAJC13     | 23317   | dnaJ homolog subfamily C member 13                                                          | NP_056083.3       | 1          | 18                | 18         | 33     | 0.89                                                     | 0.87                                                     | 4.17                                                                                   | 4.29                                                                                   | 16.2                                                                                          | 16.3                                                                                          | 19                                                                             | 19                                                                             | 10915   | 23317          | DnaJ (Hsp40) homolog, subfamily C, member 13                                                                         | Chaperone activity;Molecular function unknown           | Endosome                                | Unclassified;Chaperone                       | Protein metabolism;Biological process unknown                                 | DNAJ                | Yes                      |
| AP1S1       | 1174    | AP-1 complex subunit sigma-1A                                                               | NP_001274.1       | 1          | 3                 | 3          | 7      | 0.89                                                     | 0.87                                                     | 16.16                                                                                  | 2.07                                                                                   | 25.3                                                                                          | 3.1                                                                                           | 3                                                                              | 3                                                                              | 4635    | 1174           | adaptor-related protein complex 1, sigma 1 subunit                                                                   | Transporter activity                                    | Golgi apparatus                         | Transport/cargo protein                      | Transport                                                                     | -                   | Yes                      |
| BCS1L       | 617     | mitochondrial chaperone BCS1                                                                | NP_001244271.1    | 1          | 10                | 10         | 26     | 0.89                                                     | 0.87                                                     | 11.34                                                                                  | 5.27                                                                                   | 37.8                                                                                          | 16.7                                                                                          | 13                                                                             | 13                                                                             | 4708    | 617            | BCS1-like (yeast)                                                                                                    | Molecular function unknown                              | Mitochondrion                           | Unclassified                                 | Metabolism;Energy pathways                                                    | AAA;SP              | Yes                      |
| AKR1A1      | 10327   | alcohol dehydrogenase [NADP(+)]                                                             | NP_697021.1       | 1          | 10                | 11         | 45     | 0.89                                                     | 0.86                                                     | 5.88                                                                                   | 9.69                                                                                   | 23.1                                                                                          | 37.6                                                                                          | 19                                                                             | 19                                                                             | 69      | 10327          | aldo-keto reductase family 1, member A1(aldehyde reductase)                                                          | Oxidoreductase activity                                 | Cytoplasm                               | Enzyme: Oxidoreductase                       | Metabolism                                                                    | ALDKR               | Yes                      |
| SLC25A12    | 8604    | calcium-binding mitochondrial carrier protein Aralar1                                       | NP_003696.2       | 1          | 8                 | 12         | 27     | 0.89                                                     | 0.86                                                     | 7.38                                                                                   | 3.01                                                                                   | 19.9                                                                                          | 7.8                                                                                           | 9                                                                              | 9                                                                              | 4719    | 8604           | solute carrier family 25 (mitochondrialcarrier, Aralar), member 12                                                   | Transporter activity                                    | Mitochondrion                           | Transport/cargo protein                      | Transport                                                                     | EF                  | Yes                      |
| EVPL        | 2125    | envoplakin                                                                                  | NP_001979.2       | 1          | 3                 | 3          | 9      | 0.89                                                     | 0.86                                                     | 9.03                                                                                   | 18.77                                                                                  | 18.1                                                                                          | 37.3                                                                                          | 5                                                                              | 5                                                                              | 3352    | 2125           | envoplakin                                                                                                           | Structural molecule activity                            | Plasma membrane                         | Structural protein                           | Cell growth and/or maintenance                                                | SPECTRIN;PLECKSTRIN | Yes                      |
| GBE1        | 2632    | 1,4-alpha-glucan-branching enzyme                                                           | NP_000149.3       | 1          | 13                | 13         | 32     | 0.89                                                     | 0.86                                                     | 5.69                                                                                   | 5.36                                                                                   | 22.3                                                                                          | 20.3                                                                                          | 19                                                                             | 19                                                                             | 1985    | 2632           | glucan (1,4-alpha)-branching enzyme 1(glycogen branching enzyme, Andersen disease, glycogen storage disease type IV) | Transferase activity                                    | -                                       | Enzyme: Glycosyltransferase                  | Metabolism;Energy pathways                                                    | AMY                 | Yes                      |
| DSG2        | 1829    | desmoglein-2 preproprotein                                                                  | NP_001934.2       | 1          | 24                | 24         | 92     | 0.89                                                     | 0.86                                                     | 4.19                                                                                   | 5.08                                                                                   | 23.9                                                                                          | 27.8                                                                                          | 40                                                                             | 39                                                                             | 516     | 1829           | desmoglein 2                                                                                                         | Cell adhesion molecule activity                         | Plasma membrane                         | Adhesion molecule                            | Cell growth and/or maintenance                                                | SP,Cadherin;TM      | Yes                      |
| M6PR        | 4074    | cation-dependent mannose-6-phosphate receptor isoform 1 precursor                           | NP_002346.1       | 2          | 4                 | 4          | 14     | 0.89                                                     | 0.86                                                     | 11.77                                                                                  | 7.55                                                                                   | 28.3                                                                                          | 17.2                                                                                          | 7                                                                              | 7                                                                              | 1106    | 4074           | mannose-6-phosphate receptor (cation dependent)                                                                      | Receptor activity                                       | Plasma membrane                         | Integral membrane protein                    | Protein metabolism                                                            | SP;TM               | Yes                      |
| SVIL        | 6840    | supervillin isoform 2                                                                       | NP_068506.2       | 2          | 6                 | 6          | 13     | 0.89                                                     | 0.85                                                     | 13.09                                                                                  | 11.6                                                                                   | 31.5                                                                                          | 26.6                                                                                          | 7                                                                              | 7                                                                              | 4992    | 6840           | supervillin                                                                                                          | Cytoskeletal protein binding                            | Plasma membrane                         | Cytoskeletal associated protein              | Cell growth and/or maintenance                                                | GEL,VHP             | Yes                      |
| INF2        | 64423   | inverted fomin-2 isoform 1                                                                  | NP_071934.3       | 3          | 14                | 14         | 42     | 0.89                                                     | 0.85                                                     | 6.43                                                                                   | 5.26                                                                                   | 25.9                                                                                          | 20.2                                                                                          | 20                                                                             | 20                                                                             | 8648    | 64423          | chromosome 14 open reading frame 173                                                                                 | Molecular function unknown;Cytoskeletal protein binding | Nucleus;Cytoplasm                       | Cytoskeletal associated protein;Unclassified | Biological processes unknown;Cytoskeletal protein organization and biogenesis | CC;FH2              | Yes                      |
| DIP2B       | 57609   | disco-interacting protein 2 homolog B                                                       | NP_775873.2       | 7          | 9                 | 9          | 16     | 0.89                                                     | 0.84                                                     | 6.83                                                                                   | 9.45                                                                                   | 17.3                                                                                          | 22.8                                                                                          | 8                                                                              | 8                                                                              | 11148   | 57609          | None                                                                                                                 | Molecular function unknown                              | -                                       | Unclassified                                 | Biological processes unknown                                                  | SP                  | Yes                      |
| FGD4        | 121512  | FYVE, RhoGEF and PH domain-containing protein 4 isoform 1                                   | NP_001291409.1    | 5          | 3                 | 3          | 6      | 0.89                                                     | 0.84                                                     | 8.93                                                                                   | 70.94                                                                                  | 13.8                                                                                          | 138.2                                                                                         | 3                                                                              | 3                                                                              | 16891   | 121512         | FYVE, RhoGEF and PH domain containing 4                                                                              | Guanyl-nucleotide exchange factor activity              | Cytoskeleton                            | Guanine nucleotide exchange factor           | Cell communication;Signal transduction                                        | RHOGEF;FYVE         | Yes                      |
| SDSL        | 113675  | serine dehydratase-like                                                                     | NP_612441.1       | 1          | 3                 | 3          | 8      | 0.89                                                     | 0.84                                                     | 9.9                                                                                    | 3                                                                                      | 17.7                                                                                          | 5                                                                                             | 4                                                                              | 4                                                                              | 11542   | 113675         | serine dehydratase-like                                                                                              | Molecular function unknown                              | -                                       | Unclassified                                 | Biological processes unknown                                                  | SP                  | No                       |



Supplementary Table S1. List of quantified proteins in OKF6/TERT1-Smoke cells  
 Raingopaln *et al.*, 2017. Role of protein kinase N2 (PKN2) in cigarette smoke-mediated oncogenic transformation of oral cells

| Gene Symbol | Gene ID | Protein Description                                                              | Protein Accession | # Proteins | # Unique Peptides | # Peptides | # PSMs | OKF6/TERT1-Smoke/<br>OKF6/TERT1-Parental<br>(130/126) R1 | OKF6/TERT1-Smoke/<br>OKF6/TERT1-Parental<br>(128/127) R2 | Ratio Standard Errors [%]:<br>OKF6/TERT1-Smoke/<br>OKF6/TERT1-Parental<br>(130/126) R1 | Ratio Standard Errors [%]:<br>OKF6/TERT1-Smoke/<br>OKF6/TERT1-Parental<br>(128/127) R2 | Ratio Variabilities [%]:<br>F13: OKF6/TERT1-<br>Smoke/<br>OKF6/TERT1-Parental<br>(130/126) R1 | Ratio Variabilities [%]:<br>F13: OKF6/TERT1-<br>Smoke/<br>OKF6/TERT1-Parental<br>(128/127) R2 | Ratio Counts: F13:<br>OKF6/TERT1-Smoke/<br>OKF6/TERT1-Parental<br>(130/126) R1 | Ratio Counts: F13:<br>OKF6/TERT1-Smoke/<br>OKF6/TERT1-Parental<br>(128/127) R2 | HPRD ID | Entrez Gene Id | Gene Name                                                                                 | Molecular Function                            | Primary Localization  | Molecular Class                     | Biological Process                                                           | Domains      | Plasma Proteome Database |
|-------------|---------|----------------------------------------------------------------------------------|-------------------|------------|-------------------|------------|--------|----------------------------------------------------------|----------------------------------------------------------|----------------------------------------------------------------------------------------|----------------------------------------------------------------------------------------|-----------------------------------------------------------------------------------------------|-----------------------------------------------------------------------------------------------|--------------------------------------------------------------------------------|--------------------------------------------------------------------------------|---------|----------------|-------------------------------------------------------------------------------------------|-----------------------------------------------|-----------------------|-------------------------------------|------------------------------------------------------------------------------|--------------|--------------------------|
| HMGNI       | 3150    | non-histone chromosomal protein HMG-14                                           | NP_004956.5       | 1          | 5                 | 5          | 11     | 0.88                                                     | 1.21                                                     | 11.04                                                                                  | 13.14                                                                                  | 26.2                                                                                          | 44.1                                                                                          | 7                                                                              | 7                                                                              | 1231    | 3150           | high-mobility group nucleosome binding domain 1                                           | Transcription regulator activity              | Nucleus               | Transcription regulatory protein    | Regulation of nucleobase, nucleoside, nucleotide and nucleic acid metabolism | NLS          | Yes                      |
| TXLNA       | 200081  | alpha-taxilin                                                                    | NP_787048.1       | 1          | 11                | 11         | 34     | 0.88                                                     | 1.2                                                      | 6.26                                                                                   | 8.31                                                                                   | 22.2                                                                                          | 41.6                                                                                          | 16                                                                             | 16                                                                             | 9408    | 200081         | None                                                                                      | Molecular function unknown                    | Cytoplasm             | Unclassified                        | Cell communication;Signal transduction                                       | CC           | Yes                      |
| PSMG2       | 56984   | proteasome assembly chaperone 2 isoform 1                                        | NP_064617.2       | 2          | 6                 | 6          | 11     | 0.88                                                     | 1.16                                                     | 8.32                                                                                   | 3.81                                                                                   | 16.5                                                                                          | 9.9                                                                                           | 5                                                                              | 5                                                                              | 11638   | 56984          | tumor necrosis factor superfamily, member 5-induced protein 1                             | Molecular function unknown                    | Nucleus               | Cell cycle control protein          | Cell communication;Signal transduction                                       | -            | No                       |
| GNB2L1      | 10399   | guanine nucleotide-binding protein subunit beta-2-like 1                         | NP_006089.1       | 1          | 19                | 19         | 92     | 0.88                                                     | 1.12                                                     | 3.37                                                                                   | 3.5                                                                                    | 21.4                                                                                          | 28.5                                                                                          | 51                                                                             | 51                                                                             | 1503    | 10399          | guanine nucleotide binding protein (G-protein) beta polypeptide 2 like 1                  | Receptor signaling complex scaffold activity  | Cytoplasm             | Adapter molecule                    | Cell communication;Signal transduction                                       | WD40         | Yes                      |
| PPP3CB      | 5532    | serine/threonine-protein phosphatase 2B catalytic subunit beta isoform isoform a | NP_001135825.1    | 5          | 1                 | 7          | 20     | 0.88                                                     | 1.11                                                     | 6.09                                                                                   | 7.32                                                                                   | 7.6                                                                                           | 11.5                                                                                          | 2                                                                              | 2                                                                              | 235     | 5532           | protein phosphatase 3 (formerly 2B), catalytic subunit, beta isoform (calcineurin A beta) | Protein serine/threonine phosphatase activity | Cytoplasm             | Serine/threonine phosphatase        | Cell communication;Signal transduction                                       | PP2A         | Yes                      |
| CBR1        | 873     | carboxyl reductase [NADPH] 1 isoform 1                                           | NP_001748.1       | 2          | 17                | 17         | 61     | 0.88                                                     | 1.11                                                     | 5.16                                                                                   | 4.55                                                                                   | 25.3                                                                                          | 28.2                                                                                          | 30                                                                             | 30                                                                             | 267     | 873            | carboxyl reductase 1                                                                      | Oxidoreductase activity                       | Cytoplasm             | Enzyme: Oxidoreductase              | Metabolism;Energy pathways                                                   | -            | Yes                      |
| PNP         | 4860    | putine nucleoside phosphorylase                                                  | NP_000261.2       | 1          | 16                | 16         | 65     | 0.88                                                     | 1.08                                                     | 4.95                                                                                   | 4.94                                                                                   | 25.5                                                                                          | 31.2                                                                                          | 33                                                                             | 33                                                                             | 1247    | 4860           | nucleoside phosphorylase                                                                  | Phosphorylase activity                        | Cytoplasm             | Enzyme: Phosphorylase               | Metabolism;Energy pathways                                                   | -            | Yes                      |
| QTRT1       | 81890   | queuine tRNA-ribosyltransferase                                                  | NP_112486.1       | 1          | 2                 | 2          | 5      | 0.88                                                     | 1.07                                                     |                                                                                        |                                                                                        |                                                                                               |                                                                                               | 1                                                                              | 1                                                                              | 17943   | 81890          | queuine tRNA-ribosyltransferase 1 (tRNA-guaninetransglycosylase)                          | Catalytic activity                            | -                     | Enzyme: Ribosyltransferase          | Metabolism;Energy pathways                                                   | -            | Yes                      |
| YIPF5       | 81555   | protein YIPF5 isoform a                                                          | NP_001020118.1    | 2          | 2                 | 2          | 6      | 0.88                                                     | 1.06                                                     | 9.83                                                                                   | 3.97                                                                                   | 15.1                                                                                          | 7.3                                                                                           | 3                                                                              | 3                                                                              | 18071   | 81555          | None                                                                                      | Molecular function unknown                    | Golgi apparatus       | Unclassified                        | Biological process unknown                                                   | TM           | No                       |
| CMTR2       | 55783   | cap-specific mRNA (nucleoside-2'-O)-methyltransferase 2                          | NP_060818.4       | 1          | 1                 | 1          | 2      | 0.88                                                     | 1.05                                                     |                                                                                        |                                                                                        |                                                                                               |                                                                                               | 1                                                                              | 1                                                                              |         |                |                                                                                           |                                               |                       |                                     |                                                                              |              |                          |
| BDH2        | 56898   | 3-hydroxybutyrate dehydrogenase type 2                                           | NP_064524.3       | 1          | 2                 | 2          | 3      | 0.88                                                     | 1.04                                                     |                                                                                        |                                                                                        |                                                                                               |                                                                                               | 1                                                                              | 1                                                                              | 7103    | 56898          | dehydrogenase/reductase (SDR family) member 6                                             | Oxidoreductase activity                       | -                     | Enzyme: Oxidoreductase              | Metabolism;Energy pathways                                                   | -            | No                       |
| DNPEP       | 23549   | aspartyl aminopeptidase                                                          | NP_036232.2       | 1          | 9                 | 9          | 20     | 0.88                                                     | 1.04                                                     | 6.2                                                                                    | 8.15                                                                                   | 18.3                                                                                          | 28.6                                                                                          | 11                                                                             | 11                                                                             | 9924    | 23549          | aspartyl aminopeptidase                                                                   | Aminopeptidase activity                       | Cytoplasm             | Aminopeptidase                      | Protein metabolism                                                           | -            | Yes                      |
| APIB1       | 162     | AP-1 complex subunit beta-1 isoform b                                            | NP_663782.2       | 3          | 14                | 27         | 103    | 0.88                                                     | 1.04                                                     | 4.49                                                                                   | 5.94                                                                                   | 17.3                                                                                          | 27.4                                                                                          | 19                                                                             | 19                                                                             | 2541    | 162            | adaptor-related protein complex 1, beta 1 subunit                                         | Transporter activity                          | Golgi apparatus       | Transport/cargo protein             | Transport                                                                    | ADAP         | Yes                      |
| QDPR        | 5860    | dihydropteridine reductase isoform 1                                             | NP_000311.2       | 2          | 4                 | 4          | 7      | 0.88                                                     | 1.04                                                     | 10.97                                                                                  | 19.42                                                                                  | 19.5                                                                                          | 42                                                                                            | 4                                                                              | 4                                                                              | 2025    | 5860           | quinoid dihydropteridine reductase                                                        | Catalytic activity                            | Extracellular         | Enzyme: Reductase                   | Metabolism;Energy pathways                                                   | -            | Yes                      |
| CLPP        | 8192    | ATP-dependent Clp protease proteolytic subunit, mitochondrial precursor          | NP_006003.1       | 1          | 4                 | 4          | 7      | 0.88                                                     | 1.04                                                     | 1.91                                                                                   | 9.63                                                                                   | 3.8                                                                                           | 22.6                                                                                          | 5                                                                              | 5                                                                              | 3074    | 8192           | ClpP caseinolytic protease, ATP-dependent, proteolytic subunit homolog (E. coli)          | Peptidase activity                            | Mitochondrion         | Protease                            | Protein metabolism                                                           | -            | Yes                      |
| RPL36A      | 6173    | 60S ribosomal protein L36a isoform a                                             | NP_066357.2       | 5          | 6                 | 6          | 11     | 0.88                                                     | 1.02                                                     | 8.62                                                                                   | 4.5                                                                                    | 21.7                                                                                          | 13                                                                                            | 8                                                                              | 8                                                                              | 6709    | 6173           | ribosomal protein L36a                                                                    | Structural constituent of ribosome            | Cytoplasm             | Ribosomal subunit                   | Protein metabolism                                                           | -            | No                       |
| MAVS        | 57506   | mitochondrial antiviral-signaling protein isoform 1                              | NP_065797.2       | 2          | 7                 | 7          | 20     | 0.88                                                     | 1                                                        | 8.92                                                                                   | 11.65                                                                                  | 21.1                                                                                          | 31.5                                                                                          | 7                                                                              | 7                                                                              | 13847   | 57506          | None                                                                                      | Molecular function unknown                    | -                     | Unclassified                        | Biological process unknown                                                   | TM           | Yes                      |
| DRG2        | 1819    | developmentally-regulated GTP-binding protein 2                                  | NP_001379.1       | 1          | 8                 | 8          | 18     | 0.88                                                     | 1                                                        | 7.49                                                                                   | 8.01                                                                                   | 21.2                                                                                          | 25.8                                                                                          | 10                                                                             | 10                                                                             | 4286    | 1819           | developmentally-regulated GTP binding protein 2                                           | Molecular function unknown                    | -                     | Unclassified                        | Cell communication;Signal transduction                                       | -            | Yes                      |
| HCCS        | 3052    | cytochrome c-type heme lyase                                                     | NP_001165462.1    | 1          | 2                 | 2          | 3      | 0.88                                                     | 0.99                                                     | 42.77                                                                                  | 36.24                                                                                  | 57.5                                                                                          | 54.3                                                                                          | 2                                                                              | 2                                                                              | 2085    | 3052           | holocytochrome c synthase (cytochrome heme-lyase)                                         | Lyase activity                                | Mitochondrion         | Enzyme: Synthase                    | Metabolism;Energy pathways                                                   | -            | Yes                      |
| DTYMK       | 1841    | thymidylate kinase isoform 1                                                     | NP_036277.2       | 2          | 4                 | 4          | 6      | 0.88                                                     | 0.99                                                     | 6.37                                                                                   | 8.14                                                                                   | 11.3                                                                                          | 16.2                                                                                          | 4                                                                              | 4                                                                              | 1773    | 1841           | deoxythymidylate kinase (thymidylate kinase)                                              | Catalytic activity                            | Cytoplasm             | Enzyme: Phosphotransferase          | Metabolism;Energy pathways                                                   | -            | No                       |
| LMNB2       | 84823   | lamin-B2                                                                         | NP_116126.3       | 1          | 34                | 38         | 105    | 0.88                                                     | 0.99                                                     | 4.21                                                                                   | 4.09                                                                                   | 25.8                                                                                          | 28.4                                                                                          | 47                                                                             | 47                                                                             | 1037    | 84823          | lamin B2                                                                                  | Structural molecule activity                  | Nucleus               | Structural protein                  | Cell growth and/or maintenance                                               | NLS;CC       | Yes                      |
| MYH9        | 4627    | myosin-9                                                                         | NP_002464.1       | 9          | 127               | 159        | 1287   | 0.88                                                     | 0.98                                                     | 1.64                                                                                   | 2.95                                                                                   | 33.4                                                                                          | 72.9                                                                                          | 511                                                                            | 512                                                                            | 1177    | 4627           | myosin, heavy polypeptide 9, non muscle                                                   | Structural molecule activity                  | Cytoplasm             | Structural protein                  | Cell growth and/or maintenance                                               | MYOSIN;IQ;CC | Yes                      |
| DHRS1       | 115817  | dehydrogenase/reductase SDR family member 1                                      | NP_001129522.1    | 1          | 5                 | 5          | 10     | 0.88                                                     | 0.98                                                     | 5.39                                                                                   | 9.36                                                                                   | 11.6                                                                                          | 22.8                                                                                          | 6                                                                              | 6                                                                              | 9914    | 115817         | dehydrogenase/reductase (SDR family) member 1                                             | Catalytic activity                            | Endoplasmic reticulum | Enzyme: Dehydrogenase               | Metabolism;Energy pathways                                                   | -            | Yes                      |
| RPA3        | 6119    | replication protein A 14 kDa subunit                                             | NP_002938.1       | 1          | 3                 | 3          | 6      | 0.88                                                     | 0.97                                                     | 13.45                                                                                  | 3.21                                                                                   | 20.8                                                                                          | 5.4                                                                                           | 3                                                                              | 3                                                                              | 1567    | 6119           | replication protein A3, 14kDa                                                             | DNA binding                                   | Nucleolus             | DNA binding protein                 | Regulation of nucleobase, nucleoside, nucleotide and nucleic acid metabolism | TRNA         | Yes                      |
| NONO        | 4841    | non-POU domain-containing octamer-binding protein isoform 1                      | NP_031389.3       | 2          | 17                | 18         | 75     | 0.88                                                     | 0.97                                                     | 4.73                                                                                   | 7.73                                                                                   | 26.2                                                                                          | 49                                                                                            | 38                                                                             | 38                                                                             | 2098    | 4841           | non-POU domain containing, octamer-binding                                                | RNA binding                                   | Nucleus               | RNA binding protein                 | Regulation of nucleobase, nucleoside, nucleotide and nucleic acid metabolism | RRM;CC       | Yes                      |
| USP24       | 23358   | ubiquitin carboxyl-terminal hydrolase 24                                         | NP_056121.2       | 2          | 8                 | 9          | 19     | 0.88                                                     | 0.97                                                     | 4.12                                                                                   | 7.14                                                                                   | 10.3                                                                                          | 19.7                                                                                          | 8                                                                              | 8                                                                              | 11664   | 23358          | ubiquitin specific protease 24                                                            | Ubiquitin-specific protease activity          | Cytoplasm             | Ubiquitin proteasome system protein | Protein metabolism                                                           | UCH          | Yes                      |
| TBL2        | 26608   | transducin beta-like protein 2 precursor                                         | NP_036585.1       | 1          | 5                 | 5          | 13     | 0.88                                                     | 0.96                                                     | 3.54                                                                                   | 2.55                                                                                   | 8.2                                                                                           | 6.5                                                                                           | 7                                                                              | 7                                                                              | 9319    | 26608          | transducin (beta)-like 2                                                                  | Molecular function unknown                    | Nucleus               | Unclassified                        | Cell communication;Signal transduction                                       | WD40;CC;TM   | Yes                      |

Supplementary Table S1. List of quantified proteins in OKF6/TERT1-Smoke cells  
Raignanalan *et al.*, 2017. Role of protein kinase N2 (PKN2) in cigarette smoke-mediated oncogenic transformation of oral cells

| Gene Symbol | Gene ID | Protein Description                                                                    | Protein Accession | # Proteins | # Unique Peptides | # Peptides | # PSMs | OKF6/TERT1-Smoke/<br>OKF6/TERT1-Parental<br>(130/126) R1 | OKF6/TERT1-Smoke/<br>OKF6/TERT1-Parental<br>(128/127) R2 | Ratio Standard Errors [%]:<br>OKF6/TERT1-Smoke/<br>OKF6/TERT1-Parental<br>(130/126) R1 | Ratio Standard Errors [%]:<br>OKF6/TERT1-Smoke/<br>OKF6/TERT1-Parental<br>(128/127) R2 | Ratio Variabilities [%]:<br>F13: OKF6/TERT1-Smoke/<br>OKF6/TERT1-Parental<br>(130/126) R1 | Ratio Variabilities [%]:<br>F13: OKF6/TERT1-Smoke/<br>OKF6/TERT1-Parental<br>(128/127) R2 | Ratio Counts: F13:<br>OKF6/TERT1-Smoke/<br>OKF6/TERT1-Parental<br>(130/126) R1 | Ratio Counts: F13:<br>OKF6/TERT1-Smoke/<br>OKF6/TERT1-Parental<br>(128/127) R2 | HPRD ID | Entrez Gene ID | Gene Name                                                            | Molecular Function                           | Primary Localization   | Molecular Class                     | Biological Process                       | Domains                   | Plasma Proteome Database |
|-------------|---------|----------------------------------------------------------------------------------------|-------------------|------------|-------------------|------------|--------|----------------------------------------------------------|----------------------------------------------------------|----------------------------------------------------------------------------------------|----------------------------------------------------------------------------------------|-------------------------------------------------------------------------------------------|-------------------------------------------------------------------------------------------|--------------------------------------------------------------------------------|--------------------------------------------------------------------------------|---------|----------------|----------------------------------------------------------------------|----------------------------------------------|------------------------|-------------------------------------|------------------------------------------|---------------------------|--------------------------|
| PIK3IP1     | 113791  | phosphoinositide-3-kinase-interacting protein 1 isoform 1 precursor                    | NP_443112.2       | 1          | 1                 | 1          | 4      | 0.88                                                     | 0.96                                                     | 41.11                                                                                  | 15.43                                                                                  | 54.5                                                                                      | 21.2                                                                                      | 2                                                                              | 2                                                                              | 17518   | 113791         | None                                                                 | Molecular function unknown                   | Integral to membrane   | Integral membrane protein           | Biological process unknown               | SP;KRINGLET M             | Yes                      |
| IPO9        | 55705   | importin-9                                                                             | NP_060555.2       | 1          | 18                | 18         | 41     | 0.88                                                     | 0.96                                                     | 5.46                                                                                   | 5.36                                                                                   | 23.8                                                                                      | 25.6                                                                                      | 24                                                                             | 24                                                                             | 17154   | 55705          | importin 9                                                           | Transporter activity                         | Cytoplasm              | Transport/cargo protein             | Transport                                | SP                        | Yes                      |
| FASTKD1     | 79675   | FAST kinase domain-containing protein 1 isoform 1                                      | NP_078898.3       | 2          | 2                 | 2          | 3      | 0.88                                                     | 0.95                                                     |                                                                                        |                                                                                        |                                                                                           |                                                                                           | 1                                                                              | 1                                                                              | 7969    | 79675          | None                                                                 | Molecular function unknown                   | -                      | Unclassified                        | Biological process unknown               | CC                        | No                       |
| PIK3R4      | 30849   | phosphoinositide 3-kinase regulatory subunit 4                                         | NP_055417.1       | 1          | 9                 | 9          | 22     | 0.88                                                     | 0.95                                                     | 2.71                                                                                   | 4.62                                                                                   | 7.9                                                                                       | 14.6                                                                                      | 11                                                                             | 11                                                                             | 4010    | 30849          | phosphoinositide-3-kinase, regulatory subunit 4, p150                | Receptor signaling complex scaffold activity | -                      | Adapter molecule                    | Protein metabolism                       | S_T_Y_Kinase;C CWD40;HEAT | No                       |
| SNX17       | 9784    | sorting nexin-17 isoform 1                                                             | NP_055563.1       | 4          | 5                 | 5          | 8      | 0.88                                                     | 0.94                                                     | 7.53                                                                                   | 20.88                                                                                  | 15                                                                                        | 46.3                                                                                      | 5                                                                              | 5                                                                              | 5812    | 9784           | sorting nexin 17                                                     | Receptor signaling complex scaffold activity | Cytoplasm              | Adapter molecule                    | Cell communication;Signal transduction   | PXB41                     | Yes                      |
| SPTLC1      | 10558   | serine palmitoyltransferase 1 isoform a                                                | NP_006406.1       | 3          | 9                 | 9          | 23     | 0.88                                                     | 0.94                                                     | 4.82                                                                                   | 5.19                                                                                   | 14.8                                                                                      | 17                                                                                        | 12                                                                             | 12                                                                             | 5754    | 10558          | serine palmitoyltransferase, long chain base subunit 1               | Palmitoyltransferase activity                | Endoplasmic reticulum  | Enzyme: Palmitoyltransferase        | Metabolism;Energy pathways               | TM                        | Yes                      |
| SCRIB       | 23513   | protein scribble homolog isoform a                                                     | NP_874365.3       | 2          | 15                | 16         | 27     | 0.88                                                     | 0.93                                                     | 5.82                                                                                   | 5.43                                                                                   | 19.4                                                                                      | 19.8                                                                                      | 14                                                                             | 15                                                                             | 6984    | 23513          | scribbled homolog (Drosophila)                                       | Ubiquitin-specific protease activity         | Cytoplasm              | Ubiquitin proteasome system protein | Protein metabolism                       | LRR;CC;PDZ                | Yes                      |
| CTNNA1      | 1495    | catenin alpha-1 isoform 1                                                              | NP_001894.2       | 8          | 35                | 35         | 205    | 0.88                                                     | 0.93                                                     | 3.84                                                                                   | 5                                                                                      | 34                                                                                        | 47.4                                                                                      | 95                                                                             | 94                                                                             | 285     | 1495           | catenin (cadherin-associated protein), alpha 1, 102kDa               | Structural constituent of cytoskeleton       | Cytoplasm              | Cytoskeletal protein                | Cell growth and/or maintenance           | CC                        | Yes                      |
| UBR5        | 51366   | E3 ubiquitin-protein ligase UBR5 isoform 1                                             | NP_056986.2       | 2          | 6                 | 6          | 10     | 0.88                                                     | 0.92                                                     | 3.54                                                                                   | 14.26                                                                                  | 7                                                                                         | 30                                                                                        | 5                                                                              | 5                                                                              | 6436    | 51366          | None                                                                 | Ubiquitin-specific protease activity         | Nucleus                | Ubiquitin proteasome system protein | Protein metabolism                       | UBA;HECT-NLS              | Yes                      |
| ESYT1       | 23344   | extended synaptotagmin-1 isoform 1                                                     | NP_001171725.1    | 2          | 24                | 24         | 95     | 0.88                                                     | 0.91                                                     | 5.97                                                                                   | 5.09                                                                                   | 36.6                                                                                      | 32.7                                                                                      | 46                                                                             | 47                                                                             | 14367   | 23344          | family with sequence similarity 62 (C2 domain-containing) member A   | Calcium ion binding                          | Plasma membrane        | Calcium binding protein             | Cell communication;Signal transduction   | TM;C2                     | No                       |
| TSTA3       | 7264    | GDP-L-fucose synthase                                                                  | NP_003304.1       | 1          | 6                 | 6          | 17     | 0.88                                                     | 0.9                                                      | 3.13                                                                                   | 7.11                                                                                   | 8.3                                                                                       | 19.3                                                                                      | 9                                                                              | 9                                                                              | 654     | 7264           | tissue specific transplantation antigen P35B                         | Oxidoreductase activity                      | Cytoplasm              | Enzyme: Oxidoreductase              | Metabolism;Energy pathways               | -                         | Yes                      |
| UGT1        | 56886   | UDP-glucose:glycoprotein glucosyltransferase 1 precursor                               | NP_064505.1       | 2          | 33                | 33         | 93     | 0.88                                                     | 0.9                                                      | 3.84                                                                                   | 4.21                                                                                   | 24.4                                                                                      | 27.5                                                                                      | 51                                                                             | 51                                                                             | 12064   | 56886          | UDP-glucose ceramide glucosyltransferase-like 1                      | Transferase activity                         | Endoplasmic reticulum  | Enzyme: Glycosyltransferase         | Metabolism;Energy pathways               | SP;CC                     | Yes                      |
| ARHGAP10    | 79658   | rho GTPase-activating protein 10                                                       | NP_078881.3       | 1          | 1                 | 1          | 2      | 0.88                                                     | 0.89                                                     |                                                                                        |                                                                                        |                                                                                           |                                                                                           | 1                                                                              | 1                                                                              | 7949    | 79658          | Rho GTPase activating protein 10                                     | GTPase activator activity                    | Cytoplasm              | GTPase activating protein           | Cell communication;Signal transduction   | RHO;GAP;SH3;C CPH         | Yes                      |
| GUK1        | 2987    | guanylate kinase isoform c                                                             | NP_001229769.1    | 3          | 2                 | 2          | 2      | 0.88                                                     | 0.89                                                     | 6.07                                                                                   | 4.63                                                                                   | 7.6                                                                                       | 5.8                                                                                       | 2                                                                              | 2                                                                              | 755     | 2987           | guanylate kinase 1                                                   | Catalytic activity                           | Cytoplasm              | Enzyme: Phosphotransferase          | Cell communication;Signal transduction   | GaKinase                  | Yes                      |
| RPS10       | 6204    | 40S ribosomal protein S10                                                              | NP_001190174.1    | 2          | 14                | 14         | 51     | 0.88                                                     | 0.87                                                     | 3.72                                                                                   | 11.8                                                                                   | 16.2                                                                                      | 54                                                                                        | 24                                                                             | 24                                                                             | 4697    | 6204           | ribosomal protein S10                                                | Structural constituent of ribosome           | Ribosome               | Ribosomal subunit                   | Protein metabolism                       | -                         | Yes                      |
| ATP5H       | 10476   | ATP synthase subunit d, mitochondrial isoform a                                        | NP_006347.1       | 2          | 7                 | 7          | 14     | 0.88                                                     | 0.86                                                     | 5.41                                                                                   | 8.36                                                                                   | 14.4                                                                                      | 21.7                                                                                      | 9                                                                              | 9                                                                              | 16519   | 10476          | ATP synthase, H+-transporting, mitochondrial F1Fo complex, subunit d | Transporter activity                         | Mitochondrial membrane | Transport/cargo protein             | Metabolism;Energy pathways;ion transport | CC                        | No                       |
| APIG1       | 164     | AP-1 complex subunit gamma-1 isoform a                                                 | NP_001025178.1    | 2          | 13                | 13         | 32     | 0.88                                                     | 0.85                                                     | 4.73                                                                                   | 4.83                                                                                   | 17.3                                                                                      | 17                                                                                        | 17                                                                             | 17                                                                             | 4637    | 164            | adaptor-related protein complex 1, gamma 1 subunit                   | Transporter activity                         | Golgi apparatus        | Transport/cargo protein             | Vesicle-mediated transport               | ADAP                      | Yes                      |
| PTBP3       | 9991    | polypyrimidine tract-binding protein 3 isoform 6                                       | NP_001231827.1    | 6          | 9                 | 12         | 43     | 0.88                                                     | 0.85                                                     | 4.35                                                                                   | 10.75                                                                                  | 13.3                                                                                      | 32.4                                                                                      | 12                                                                             | 12                                                                             |         |                |                                                                      |                                              |                        |                                     |                                          |                           |                          |
| NDUFA10     | 4705    | NADH dehydrogenase [ubiquinone] 1 alpha subcomplex subunit 10, mitochondrial precursor | NP_004535.1       | 1          | 6                 | 6          | 15     | 0.88                                                     | 0.85                                                     | 15.09                                                                                  | 17.48                                                                                  | 38.9                                                                                      | 44.1                                                                                      | 8                                                                              | 8                                                                              | 11950   | 4705           | NADH dehydrogenase (ubiquinone) 1 alpha subcomplex, 10, 42kDa        | Oxidoreductase activity                      | Mitochondrion          | Enzyme: Oxidoreductase              | Metabolism;Energy pathways               | SP                        | Yes                      |
| NUBPL       | 80224   | iron-sulfur protein NUBPL isoform 1 precursor                                          | NP_079428.2       | 3          | 3                 | 3          | 5      | 0.88                                                     | 0.85                                                     | 2.34                                                                                   | 3.4                                                                                    | 2.9                                                                                       | 4.1                                                                                       | 2                                                                              | 2                                                                              | 16600   | 80224          | nucleotide binding protein-like                                      | Molecular function unknown                   | -                      | Unclassified                        | Biological process unknown               | -                         | Yes                      |
| CAPZA1      | 829     | F-actin-capping protein subunit alpha-1                                                | NP_006126.1       | 1          | 11                | 13         | 88     | 0.88                                                     | 0.85                                                     | 4.42                                                                                   | 5.99                                                                                   | 22                                                                                        | 28.9                                                                                      | 31                                                                             | 31                                                                             | 3347    | 829            | capping protein (actin filament) muscle/z-line, alpha 1              | Structural molecule activity                 | Cytoplasm              | Structural protein                  | Cell growth and/or maintenance           | -                         | Yes                      |
| RAB7A       | 7879    | ras-related protein Rab-7a                                                             | NP_004628.4       | 1          | 16                | 16         | 65     | 0.88                                                     | 0.84                                                     | 4.68                                                                                   | 4.53                                                                                   | 23.9                                                                                      | 22.1                                                                                      | 33                                                                             | 33                                                                             | 3805    | 7879           | RAB7, member RAS oncogene family                                     | GTPase activity                              | Endosome               | GTPase                              | Cell communication;Signal transduction   | RAB                       | Yes                      |
| ARRDC2      | 27106   | arrestin domain-containing protein 2 isoform 2                                         | NP_001020775.1    | 1          | 1                 | 1          | 1      | 0.88                                                     | 0.83                                                     |                                                                                        |                                                                                        |                                                                                           |                                                                                           | 1                                                                              | 1                                                                              | 12492   | 27106          | arrestin domain containing 2                                         | Molecular function unknown                   | -                      | Unclassified                        | Biological process unknown               | SP                        | No                       |
| PFKL        | 5211    | ATP-dependent 6-phosphofructokinase, liver type isoform b                              | NP_002617.3       | 2          | 17                | 20         | 71     | 0.88                                                     | 0.83                                                     | 5.52                                                                                   | 6.18                                                                                   | 23                                                                                        | 24.5                                                                                      | 22                                                                             | 22                                                                             | 1385    | 5211           | phosphofructokinase, liver                                           | Catalytic activity                           | Cytoplasm              | Enzyme: Phosphotransferase          | Metabolism;Energy pathways               | -                         | Yes                      |
| IDH2        | 3418    | isocitrate dehydrogenase [NADP], mitochondrial isoform 1 precursor                     | NP_002159.2       | 3          | 11                | 12         | 41     | 0.88                                                     | 0.83                                                     | 4.97                                                                                   | 6.24                                                                                   | 20.6                                                                                      | 24.5                                                                                      | 22                                                                             | 22                                                                             | 973     | 3418           | isocitrate dehydrogenase 2 (NADP+), mitochondrial                    | Catalytic activity                           | Mitochondrion          | Enzyme: Dehydrogenase               | Metabolism;Energy pathways               | -                         | Yes                      |
| EXOC4       | 60412   | exocyst complex component 4 isoform a                                                  | NP_068579.3       | 2          | 8                 | 8          | 16     | 0.88                                                     | 0.82                                                     | 5.5                                                                                    | 12.76                                                                                  | 14.6                                                                                      | 32                                                                                        | 9                                                                              | 9                                                                              | 12185   | 60412          | SEC8-like 1 (S. cerevisiae)                                          | Transporter activity                         | Plasma membrane        | Transport/cargo protein             | Transport                                | CC                        | Yes                      |
| STX6        | 10228   | syntaxin-6 isoform 1                                                                   | NP_005810.1       | 2          | 3                 | 3          | 4      | 0.88                                                     | 0.81                                                     | 0.45                                                                                   | 4.62                                                                                   | 0.7                                                                                       | 6.5                                                                                       | 3                                                                              | 3                                                                              | 7231    | 10228          | syntaxin 6                                                           | Auxiliary transport protein activity         | Plasma membrane        | Membrane transport protein          | Cell communication;Signal transduction   | CC;TM                     | Yes                      |
| EXOC1       | 55763   | exocyst complex component 1 isoform 1                                                  | NP_060731.2       | 2          | 10                | 10         | 17     | 0.88                                                     | 0.79                                                     | 3.27                                                                                   | 11.05                                                                                  | 9.1                                                                                       | 28.2                                                                                      | 10                                                                             | 10                                                                             | 7615    | 55763          | SEC3-like 1 (S. cerevisiae)                                          | Transporter activity                         | Cytoplasm              | Transport/cargo protein             | Transport                                | CC                        | Yes                      |
| HINT1       | 3094    | histidine triad nucleotide-binding protein 1                                           | NP_005331.1       | 1          | 3                 | 3          | 4      | 0.88                                                     | 0.78                                                     | 8.09                                                                                   | 13.11                                                                                  | 12.4                                                                                      | 17.9                                                                                      | 3                                                                              | 3                                                                              | 3204    | 3094           | histidine triad nucleotide binding protein 1                         | ATPase activity                              | Cytoplasm              | ATPase                              | Cell communication;Signal transduction   | -                         | Yes                      |
| ABRACL      | 58527   | cotarsin family protein ABRACL                                                         | NP_067066.1       | 1          | 2                 | 2          | 3      | 0.88                                                     | 0.77                                                     |                                                                                        |                                                                                        |                                                                                           |                                                                                           | 1                                                                              | 1                                                                              |         |                |                                                                      |                                              |                        |                                     |                                          |                           |                          |
| FASTKD2     | 22868   | FAST kinase domain-containing protein 2                                                | NP_055744.2       | 1          | 3                 | 3          | 5      | 0.88                                                     | 0.75                                                     | 9.79                                                                                   | 4.52                                                                                   | 15                                                                                        | 5.9                                                                                       | 3                                                                              | 3                                                                              | 13825   | 22868          | KIAA0971                                                             | Molecular function unknown                   | -                      | Unclassified                        | Biological process unknown               | -                         | No                       |

Supplementary Table S1. List of quantified proteins in OKF6/TERT1-Smoke cells

Raijnagan et al., 2017. Role of protein kinase N2 (PKN2) in cigarette smoke-mediated oncogenic transformation of oral cells

| Gene Symbol | Gene ID | Protein Description                                                       | Protein Accession | # Proteins | # Unique Peptides | # Peptides | # PSMs | OKF6/TERT1-Smoke/<br>OKF6/TERT1-Parental<br>(130/126) R1 | OKF6/TERT1-Smoke/<br>OKF6/TERT1-Parental<br>(128/127) R2 | Ratio Standard Errors [%]:<br>OKF6/TERT1-Smoke/<br>OKF6/TERT1-Parental<br>(130/126) R1 | Ratio Standard Errors [%]:<br>OKF6/TERT1-Smoke/<br>OKF6/TERT1-Parental<br>(128/127) R2 | Ratio Variabilities [%]:<br>F13: OKF6/TERT1-Smoke/<br>OKF6/TERT1-Parental<br>(130/126) R1 | Ratio Variabilities [%]:<br>F13: OKF6/TERT1-Smoke/<br>OKF6/TERT1-Parental<br>(128/127) R2 | Ratio Counts: F13:<br>OKF6/TERT1-Smoke/<br>OKF6/TERT1-Parental<br>(130/126) R1 | Ratio Counts: F13:<br>OKF6/TERT1-Smoke/<br>OKF6/TERT1-Parental<br>(128/127) R2 | HPRD ID | Entrez Gene ID | Gene Name                                                        | Molecular Function                           | Primary Localization   | Molecular Class            | Biological Process                                               | Domains        | Plasma Proteome Database |
|-------------|---------|---------------------------------------------------------------------------|-------------------|------------|-------------------|------------|--------|----------------------------------------------------------|----------------------------------------------------------|----------------------------------------------------------------------------------------|----------------------------------------------------------------------------------------|-------------------------------------------------------------------------------------------|-------------------------------------------------------------------------------------------|--------------------------------------------------------------------------------|--------------------------------------------------------------------------------|---------|----------------|------------------------------------------------------------------|----------------------------------------------|------------------------|----------------------------|------------------------------------------------------------------|----------------|--------------------------|
| PKP3        | 11187   | plakophilin-3 isoform PKP3b                                               | NP_001289958.1    | 2          | 28                | 28         | 75     | 0.88                                                     | 0.75                                                     | 4.25                                                                                   | 5.46                                                                                   | 23.4                                                                                      | 25.7                                                                                      | 38                                                                             | 38                                                                             | 5711    | 11187          | plakophilin 3                                                    | Cell adhesion molecule activity              | Plasma membrane        | Cell junction protein      | Cell communication;Signal transduction                           | ARM            | Yes                      |
| MORC3       | 23515   | MORC family CW-type zinc finger protein 3                                 | NP_056173.1       | 1          | 6                 | 6          | 9      | 0.88                                                     | 0.75                                                     | 20.34                                                                                  | 4.81                                                                                   | 41.9                                                                                      | 8.1                                                                                       | 5                                                                              | 5                                                                              | 10316   | 23515          | zinc finger, CW type with coiled-coil domain 3                   | RNA binding                                  | Nucleus                | RNA binding protein        | Regulation of nucleobase, nucleotide and nucleic acid metabolism | CC,NLS         | Yes                      |
| KLHL36      | 79786   | kelch-like protein 36 isoform 1                                           | NP_079007.2       | 2          | 1                 | 1          | 1      | 0.88                                                     | 0.75                                                     |                                                                                        |                                                                                        |                                                                                           |                                                                                           | 1                                                                              | 1                                                                              | 12675   | 79786          | chromosome 16 open reading frame 44                              | Molecular function unknown                   | -                      | Unclassified               | Biological process unknown                                       | BTB,KELCH      | No                       |
| UBFD1       | 56061   | ubiquitin domain-containing protein UBFD1                                 | NP_061989.2       | 1          | 1                 | 1          | 2      | 0.88                                                     | 0.73                                                     |                                                                                        |                                                                                        |                                                                                           |                                                                                           | 1                                                                              | 1                                                                              | 15606   | 56061          | None                                                             | Molecular function unknown                   | -                      | Unclassified               | Protein metabolism                                               | UBQ            | No                       |
| RHOT2       | 89941   | mitochondrial Rho GTPase 2                                                | NP_620124.1       | 9          | 12                | 12         | 38     | 0.88                                                     | 0.72                                                     | 4.03                                                                                   | 7.85                                                                                   | 14.6                                                                                      | 23.6                                                                                      | 17                                                                             | 17                                                                             | 15248   | 89941          | ras homolog gene family, member T2                               | GTPase activity                              | Mitochondrion          | GTPase                     | Cell communication;Signal transduction                           | EF-TM          | Yes                      |
| RPA2        | 6118    | replication protein A 32 kDa subunit isoform 3                            | NP_001284487.1    | 3          | 4                 | 4          | 20     | 0.88                                                     | 0.71                                                     | 3.61                                                                                   | 35.24                                                                                  | 7.1                                                                                       | 60.8                                                                                      | 5                                                                              | 5                                                                              | 1566    | 6118           | replication protein A2, 32kDa                                    | DNA binding                                  | Nucleus                | DNA binding protein        | Regulation of nucleobase, nucleotide and nucleic acid metabolism | TRNAAs         | Yes                      |
| SMG1        | 23049   | serine/threonine-protein kinase SMG1                                      | NP_055907.3       | 1          | 2                 | 2          | 3      | 0.88                                                     | 0.69                                                     | 34.93                                                                                  | 47.39                                                                                  | 45.6                                                                                      | 48.6                                                                                      | 2                                                                              | 2                                                                              | 6123    | 23049          | None                                                             | Molecular function unknown                   | Nucleus                | Unclassified               | Regulation of nucleobase, nucleotide and nucleic acid metabolism | PI3K,CC        | Yes                      |
| TMED3       | 23423   | transmembrane emp24 domain-containing protein 3 isoform a precursor       | NP_031390.1       | 1          | 2                 | 2          | 4      | 0.88                                                     | 0.68                                                     | 1.13                                                                                   | 16.99                                                                                  | 1.4                                                                                       | 16.5                                                                                      | 2                                                                              | 2                                                                              | 18200   | 23423          | transmembrane emp24 domain containing 3                          | Molecular function unknown                   | Integral to membrane   | Integral membrane protein  | Biological processes unknown                                     | SP,TM          | Yes                      |
| FTL         | 2512    | ferritin light chain                                                      | NP_000137.2       | 1          | 3                 | 3          | 7      | 0.88                                                     | 0.64                                                     | 7.75                                                                                   | 13.14                                                                                  | 13.7                                                                                      | 16.9                                                                                      | 4                                                                              | 4                                                                              | 616     | 2512           | ferritin, light polypeptide                                      | Storage protein                              | Cytoplasm              | Storage protein            | Transport                                                        | -              | Yes                      |
| RNF185      | 91445   | E3 ubiquitin-protein ligase RNF185 isoform 1                              | NP_689480.2       | 1          | 2                 | 2          | 3      | 0.88                                                     | 0.58                                                     |                                                                                        |                                                                                        |                                                                                           |                                                                                           | 1                                                                              | 1                                                                              | 8790    | 91445          | ring finger protein 185                                          | Molecular function unknown                   | -                      | Unclassified               | Biological processes unknown                                     | RING,TM        | No                       |
| HINT2       | 84681   | histidine triad nucleotide-binding protein 2, mitochondrial precursor     | NP_115982.1       | 1          | 5                 | 5          | 9      | 0.88                                                     | 0.51                                                     | 3.87                                                                                   | 53.87                                                                                  | 6.8                                                                                       | 60                                                                                        | 4                                                                              | 4                                                                              | 17106   | 84681          | histidine triad nucleotide binding protein 2                     | Hydrolase activity                           | Mitochondrion          | Enzyme;Hydrolase           | Metabolism;Energy pathways                                       | SP             | Yes                      |
| ANKZF1      | 55139   | ankyrin repeat and zinc finger domain-containing protein 1 isoform 1      | NP_001035869.1    | 2          | 4                 | 4          | 9      | 0.87                                                     | 1.89                                                     | 34.98                                                                                  | 10.6                                                                                   | 56.7                                                                                      | 35.7                                                                                      | 3                                                                              | 3                                                                              | 7673    | 55139          | None                                                             | Molecular function unknown                   | Cytoplasm              | Unclassified               | Biological processes unknown                                     | ANK,CC         | No                       |
| FADD        | 8772    | FAS-associated death domain protein                                       | NP_003815.1       | 1          | 1                 | 1          | 1      | 0.87                                                     | 1.54                                                     |                                                                                        |                                                                                        |                                                                                           |                                                                                           | 1                                                                              | 1                                                                              | 3909    | 8772           | Fas (TNFRSF6) associated via death domain                        | Receptor signaling complex scaffold activity | Cytoplasm              | Adapter molecule           | Cell communication;Signal transduction                           | DED,DEATH      | Yes                      |
| STK39       | 27347   | STE20/SPS1-related proline-alanine-rich protein kinase                    | NP_037365.2       | 1          | 4                 | 5          | 12     | 0.87                                                     | 1.53                                                     | 5.66                                                                                   | 6.08                                                                                   | 11                                                                                        | 21.1                                                                                      | 5                                                                              | 5                                                                              | 9627    | 27347          | serine/threonine kinase 39 (STE20/SPS1 homolog yeast)            | Protein serine/threonine kinase activity     | Cytoplasm              | Serine/threonine kinase    | Cell communication;Signal transduction                           | S,T_kinase;NLS | Yes                      |
| OSTM1       | 28962   | osteopetrosis-associated transmembrane protein 1                          | NP_054747.2       | 1          | 2                 | 2          | 5      | 0.87                                                     | 1.42                                                     | 1.53                                                                                   | 44.87                                                                                  | 1.9                                                                                       | 112.4                                                                                     | 2                                                                              | 2                                                                              | 9628    | 28962          | osteopetrosis associated transmembrane protein                   | Molecular function unknown                   | Plasma membrane        | Unclassified               | Biological processes unknown                                     | TM             | No                       |
| CSNK2B      | 1460    | casein kinase II subunit beta isoform 1                                   | NP_001311.3       | 2          | 4                 | 4          | 9      | 0.87                                                     | 1.4                                                      | 24.25                                                                                  | 22.44                                                                                  | 49.8                                                                                      | 79.5                                                                                      | 5                                                                              | 5                                                                              | 278     | 1460           | casein kinase 2, beta polypeptide                                | Protein serine/threonine kinase activity     | -                      | Serine/threonine kinase    | Cell communication;Signal transduction                           | -              | Yes                      |
| GPKOW       | 27238   | G patch domain and KOW motif-containing protein                           | NP_056513.2       | 1          | 4                 | 4          | 10     | 0.87                                                     | 1.36                                                     | 10.57                                                                                  | 6.82                                                                                   | 22.9                                                                                      | 23.1                                                                                      | 6                                                                              | 6                                                                              | 6737    | 27238          | G patch domain and KOW motifs                                    | Molecular function unknown                   | Cytoplasm              | Unclassified               | Biological processes unknown                                     | G_PATCH        | Yes                      |
| NUPL2       | 11097   | nucleoporin-like protein 2                                                | NP_031368.1       | 1          | 1                 | 1          | 2      | 0.87                                                     | 1.3                                                      |                                                                                        |                                                                                        |                                                                                           |                                                                                           | 1                                                                              | 1                                                                              | 14855   | 11097          | nucleoporin like 2                                               | Transporter activity                         | Nuclear membrane       | Transport/cargo protein    | Transport                                                        | CC             | No                       |
| CRKL        | 1399    | crk-like protein                                                          | NP_005198.1       | 1          | 2                 | 2          | 4      | 0.87                                                     | 1.26                                                     |                                                                                        |                                                                                        |                                                                                           |                                                                                           | 1                                                                              | 1                                                                              | 3596    | 1399           | v-crck sarcoma virus CT10 oncogene homolog (avian)-like          | Receptor signaling complex scaffold activity | Cytoplasm              | Adapter molecule           | Cell communication;Signal transduction                           | SH2,SH3        | Yes                      |
| METTL15     | 196074  | probable methyltransferase-like protein 15 isoform 1                      | NP_001107000.1    | 1          | 4                 | 4          | 9      | 0.87                                                     | 1.22                                                     | 8.98                                                                                   | 16.1                                                                                   | 17.6                                                                                      | 46                                                                                        | 5                                                                              | 5                                                                              |         |                |                                                                  |                                              |                        |                            |                                                                  |                |                          |
| SNRPB2      | 6629    | U2 small nuclear ribonucleoprotein B'                                     | NP_937863.1       | 1          | 3                 | 4          | 6      | 0.87                                                     | 1.22                                                     | 1.56                                                                                   | 12.81                                                                                  | 2.7                                                                                       | 32                                                                                        | 4                                                                              | 4                                                                              | 4628    | 6629           | small nuclear ribonucleoprotein polypeptide B'                   | RNA binding                                  | Nucleus                | Ribonucleoprotein          | RNA metabolism                                                   | RRM            | Yes                      |
| RPL30       | 6156    | 60S ribosomal protein L30                                                 | NP_000980.1       | 1          | 7                 | 7          | 61     | 0.87                                                     | 1.2                                                      | 7.5                                                                                    | 6.78                                                                                   | 37.4                                                                                      | 47.5                                                                                      | 31                                                                             | 31                                                                             | 1595    | 6156           | ribosomal protein L30                                            | Structural constituent of ribosome           | -                      | Ribosomal subunit          | Protein metabolism                                               | -              | Yes                      |
| VPS4B       | 9525    | vacuolar protein sorting-associated protein 4B                            | NP_004860.2       | 3          | 11                | 13         | 39     | 0.87                                                     | 1.19                                                     | 4.98                                                                                   | 8.11                                                                                   | 15.1                                                                                      | 34.3                                                                                      | 12                                                                             | 12                                                                             | 15653   | 9525           | vacuolar protein sorting 4B (yeast)                              | Transporter activity                         | Perinuclear region     | Transport/cargo protein    | Transport                                                        | CC,AAA         | Yes                      |
| SLC25A46    | 91137   | solute carrier family 25 member 46 isoform 1                              | NP_620128.1       | 3          | 1                 | 1          | 2      | 0.87                                                     | 1.18                                                     |                                                                                        |                                                                                        |                                                                                           |                                                                                           | 1                                                                              | 1                                                                              | 14283   | 91137          | None                                                             | Transporter activity                         | Mitochondrial membrane | Transport/cargo protein    | Transport                                                        | -              | Yes                      |
| RRP12       | 23223   | RRP12-like protein isoform 1                                              | NP_055994.2       | 3          | 14                | 14         | 25     | 0.87                                                     | 1.18                                                     | 13.83                                                                                  | 6.81                                                                                   | 39.2                                                                                      | 25.9                                                                                      | 10                                                                             | 10                                                                             | 11103   | 23223          | KIAA0690                                                         | Molecular function unknown                   | Nucleolus              | Unclassified               | Biological processes unknown                                     | CC             | No                       |
| MARCKS      | 4082    | myristoylated alanine-rich C-kinase substrate                             | NP_002347.5       | 1          | 8                 | 9          | 27     | 0.87                                                     | 1.17                                                     | 12.44                                                                                  | 14.6                                                                                   | 40.6                                                                                      | 67.8                                                                                      | 13                                                                             | 13                                                                             | 7519    | 4082           | myristoylated alanine-rich protein kinase C substrate            | Structural constituent of cytoskeleton       | Plasma membrane        | Cytoskeletal protein       | Cell growth and/or maintenance                                   | -              | Yes                      |
| AK1         | 203     | adenylate kinase isoenzyme 1                                              | NP_000467.1       | 1          | 6                 | 6          | 14     | 0.87                                                     | 1.16                                                     | 15.77                                                                                  | 9.64                                                                                   | 37.4                                                                                      | 30.2                                                                                      | 7                                                                              | 7                                                                              | 46      | 203            | adenylate kinase 1                                               | Catalytic activity                           | Cytoplasm              | Enzyme;Phosphotransferase  | Metabolism;Energy pathways                                       | -              | Yes                      |
| GTF2B       | 2959    | transcription initiation factor IIb                                       | NP_001505.1       | 1          | 4                 | 4          | 4      | 0.87                                                     | 1.15                                                     | 8.93                                                                                   | 4.88                                                                                   | 13.5                                                                                      | 9.7                                                                                       | 3                                                                              | 3                                                                              | 8928    | 2959           | general transcription factor IIb                                 | Transcription factor activity                | Nucleus                | Transcription factor       | -                                                                | CYCLIN         | Yes                      |
| FAM160B1    | 57700   | protein FAM160B1 isoform a                                                | NP_065991.3       | 3          | 3                 | 3          | 7      | 0.87                                                     | 1.15                                                     | 11.61                                                                                  | 10.38                                                                                  | 20.5                                                                                      | 24.2                                                                                      | 4                                                                              | 4                                                                              | 17219   | 57700          | KIAA1600                                                         | Molecular function unknown                   | -                      | Unclassified               | Biological processes unknown                                     | -              | Yes                      |
| TMM17B      | 10245   | mitochondrial import inner membrane translocase subunit Tim17-B isoform 2 | NP_005825.1       | 2          | 3                 | 3          | 5      | 0.87                                                     | 1.14                                                     | 7.14                                                                                   | 39.44                                                                                  | 8.8                                                                                       | 70.4                                                                                      | 2                                                                              | 2                                                                              | 2218    | 10245          | translocase of inner mitochondrial membrane 17 homolog B (yeast) | Auxiliary transport protein activity         | Plasma membrane        | Membrane transport protein | Transport                                                        | TM             | Yes                      |

Supplementary Table S1. List of quantified proteins in OKF6/TERT1-Smoke cells  
 Raingonpalan *et al.*, 2017. Role of protein kinase N2 (PKN2) in cigarette smoke-mediated oncogenic transformation of oral cells

| Gene Symbol | Gene ID | Protein Description                                              | Protein Accession | # Proteins | # Unique Peptides | # Peptides | # PSMs | OKF6/TERT1-Smoke/<br>OKF6/TERT1-Parental<br>(130/126) R1 | OKF6/TERT1-Smoke/<br>OKF6/TERT1-Parental<br>(128/127) R2 | Ratio Standard Errors [%]:<br>OKF6/TERT1-Smoke/<br>OKF6/TERT1-Parental<br>(130/126) R1 | Ratio Standard Errors [%]:<br>OKF6/TERT1-Smoke/<br>OKF6/TERT1-Parental<br>(128/127) R2 | Ratio Variabilities [%]:<br>F13: OKF6/TERT1-<br>Smoke/<br>OKF6/TERT1-Parental<br>(130/126) R1 | Ratio Variabilities [%]:<br>F13: OKF6/TERT1-<br>Smoke/<br>OKF6/TERT1-Parental<br>(128/127) R2 | Ratio Counts: F13:<br>OKF6/TERT1-Smoke/<br>OKF6/TERT1-Parental<br>(130/126) R1 | Ratio Counts: F13:<br>OKF6/TERT1-Smoke/<br>OKF6/TERT1-Parental<br>(128/127) R2 | HPRD ID | Entrez Gene Id | Gene Name                                                                                           | Molecular Function                             | Primary Localization   | Molecular Class                         | Biological Process                                               | Domains     | Plasma Proteome Database |
|-------------|---------|------------------------------------------------------------------|-------------------|------------|-------------------|------------|--------|----------------------------------------------------------|----------------------------------------------------------|----------------------------------------------------------------------------------------|----------------------------------------------------------------------------------------|-----------------------------------------------------------------------------------------------|-----------------------------------------------------------------------------------------------|--------------------------------------------------------------------------------|--------------------------------------------------------------------------------|---------|----------------|-----------------------------------------------------------------------------------------------------|------------------------------------------------|------------------------|-----------------------------------------|------------------------------------------------------------------|-------------|--------------------------|
| COG7        | 91949   | conserved oligomeric Golgi complex subunit 7                     | NP_705831.1       | 1          | 3                 | 3          | 7      | 0.87                                                     | 1.12                                                     | 4.03                                                                                   | 6.76                                                                                   | 7                                                                                             | 15.2                                                                                          | 4                                                                              | 4                                                                              | 7373    | 91949          | component of oligomeric golgi complex 7                                                             | Structural molecule activity                   | Golgi apparatus        | Structural protein                      | Transport                                                        | CC          | Yes                      |
| PAP1        | 10605   | polyadenylate-binding protein-interacting protein 1 isoform 1    | NP_006442.2       | 3          | 8                 | 8          | 20     | 0.87                                                     | 1.12                                                     | 6.75                                                                                   | 6.02                                                                                   | 18.7                                                                                          | 21.6                                                                                          | 10                                                                             | 10                                                                             | 5539    | 10605          | poly(A) binding protein interacting protein 1                                                       | Translation regulator activity;Protein binding | Cytoplasm              | Translation regulatory protein          | Protein metabolism;Regulation of translation                     | MIF4G       | Yes                      |
| COTL1       | 23406   | coactosin-like protein                                           | NP_066972.1       | 1          | 7                 | 7          | 22     | 0.87                                                     | 1.12                                                     | 12.25                                                                                  | 5.4                                                                                    | 36.3                                                                                          | 20.3                                                                                          | 11                                                                             | 11                                                                             | 9482    | 23406          | coactosin-like 1 (Dicyostelium)                                                                     | Molecular function unknown                     | Cytoplasm              | Unclassified                            | Cell growth and/or maintenance                                   | ADF         | Yes                      |
| POR         | 5447    | NADPH-cytochrome P450 reductase                                  | NP_000932.3       | 1          | 10                | 10         | 33     | 0.87                                                     | 1.12                                                     | 7.13                                                                                   | 9.41                                                                                   | 25                                                                                            | 42.5                                                                                          | 16                                                                             | 15                                                                             | 485     | 5447           | P450 (cytochrome) oxidoreductase                                                                    | Catalytic activity                             | Endoplasmic reticulum  | Enzyme: Reductase                       | Metabolism;Energy pathways                                       | TM          | Yes                      |
| AK3         | 50808   | GTP-AMP phosphotransferase AK3, mitochondrial isoform a          | NP_057366.2       | 3          | 6                 | 6          | 8      | 0.87                                                     | 1.11                                                     | 0.68                                                                                   | 10.15                                                                                  | 1.3                                                                                           | 25.7                                                                                          | 5                                                                              | 5                                                                              | 12439   | 50808          | adenylate kinase 3                                                                                  | Catalytic activity                             | Mitochondrion          | Enzyme: Phosphotransferase              | Metabolism;Energy pathways                                       | -           | Yes                      |
| ALG1        | 56052   | chitinobiosyl/diphosphodichol beta-mannosyltransferase           | NP_061982.3       | 3          | 5                 | 5          | 8      | 0.87                                                     | 1.11                                                     | 18.42                                                                                  | 16.37                                                                                  | 37.1                                                                                          | 42.4                                                                                          | 5                                                                              | 5                                                                              | 10437   | 56052          | asparagine-linked glycosylation 1 homolog/yeast, beta-1,4-mannosyltransferase                       | Mannosyltransferase activity                   | Endoplasmic reticulum  | Enzyme: Mannosyltransferase             | Metabolism;Energy pathways                                       | TM          | No                       |
| GALNT1      | 2589    | polypeptide N-acetylgalactosaminyltransferase 1                  | NP_065207.2       | 1          | 2                 | 2          | 5      | 0.87                                                     | 1.1                                                      | 13.32                                                                                  | 0.64                                                                                   | 20.2                                                                                          | 1.2                                                                                           | 3                                                                              | 3                                                                              | 3781    | 2589           | UDP-N-acetyl-alpha-D-galactosamine:polypeptideN-acetylgalactosaminyltransferase 1 (GalNAc-T1)       | Galactosyltransferase activity                 | Endoplasmic reticulum  | Enzyme: Galactosyltransferase           | Metabolism;Energy pathways                                       | TM          | Yes                      |
| SNX9        | 51429   | sorting nexin-9                                                  | NP_057308.1       | 1          | 6                 | 6          | 12     | 0.87                                                     | 1.1                                                      | 7.41                                                                                   | 18.41                                                                                  | 17.2                                                                                          | 57.9                                                                                          | 7                                                                              | 7                                                                              | 12072   | 51429          | sorting nexin 9                                                                                     | Receptor signaling complex scaffold activity   | -                      | Adapter molecule                        | Cell communication;Signal transduction                           | SH3;PX      | Yes                      |
| AKR1C3      | 8644    | aldo-keto reductase family 1 member C3 isoform 1                 | NP_003730.4       | 6          | 6                 | 15         | 53     | 0.87                                                     | 1.1                                                      | 10.75                                                                                  | 10.34                                                                                  | 34.6                                                                                          | 42.9                                                                                          | 13                                                                             | 13                                                                             | 4911    | 8644           | aldo-keto reductase family 1, member C3(3-alpha hydroxysteroid dehydrogenase, type II)              | Catalytic activity                             | Cytoplasm              | Enzyme: Reductase                       | Metabolism;Energy pathways                                       | ALDKR       | Yes                      |
| NTPCR       | 84284   | cancer-related nucleoside-triphosphatase                         | NP_115700.1       | 1          | 6                 | 6          | 14     | 0.87                                                     | 1.09                                                     | 5.93                                                                                   | 6.15                                                                                   | 14.6                                                                                          | 19.1                                                                                          | 8                                                                              | 8                                                                              |         |                |                                                                                                     |                                                |                        |                                         |                                                                  |             |                          |
| CD59        | 966     | CD59 glycoprotein preproprotein                                  | NP_001120695.1    | 1          | 6                 | 6          | 21     | 0.87                                                     | 1.08                                                     | 12.83                                                                                  | 5.36                                                                                   | 38.3                                                                                          | 19.5                                                                                          | 11                                                                             | 11                                                                             | 117     | 966            | CD59 antigen p18-20 (antigen identified by monoclonal antibodies 16.3A5, EJ16, EJ30, EJ32 and G344) | Receptor activity                              | Plasma membrane        | Cell surface receptor                   | Immune response                                                  | GPLSP       | Yes                      |
| CEBPZ       | 10153   | CCAAT/enhancer-binding protein zeta                              | NP_005751.2       | 1          | 5                 | 5          | 9      | 0.87                                                     | 1.07                                                     | 5.73                                                                                   | 6.73                                                                                   | 11.2                                                                                          | 16.3                                                                                          | 5                                                                              | 5                                                                              | 9875    | 10153          | CCAAT/enhancer binding protein zeta                                                                 | Transcription regulator activity               | Nucleus                | Transcription regulatory protein        | Regulation of nucleobase, nucleotide and nucleic acid metabolism | NLS         | Yes                      |
| CCDC6       | 8030    | coiled-coil domain-containing protein 6                          | NP_005427.2       | 1          | 6                 | 6          | 13     | 0.87                                                     | 1.07                                                     | 6.46                                                                                   | 5.75                                                                                   | 16                                                                                            | 17.5                                                                                          | 8                                                                              | 8                                                                              | 9064    | 8030           | coiled-coil domain containing 6                                                                     | Structural constituent of cytoskeleton         | Cytoplasm              | Unclassified;Cell cycle control protein | Apoptosis                                                        | CC          | Yes                      |
| SKIV2L      | 6499    | helicase SKI2W                                                   | NP_008860.4       | 1          | 12                | 12         | 39     | 0.87                                                     | 1.06                                                     | 4.12                                                                                   | 4.6                                                                                    | 14.9                                                                                          | 19.8                                                                                          | 17                                                                             | 16                                                                             | 2724    | 6499           | superkiller viraliclike activity 2-like (S.cerevisiae)                                              | RNA binding                                    | Nucleolus              | RNA binding protein                     | Regulation of nucleobase, nucleotide and nucleic acid metabolism | DEXDc;HELIC | Yes                      |
| SLC12A2     | 6558    | solute carrier family 12 member 2 isoform 1                      | NP_001037.1       | 2          | 3                 | 3          | 6      | 0.87                                                     | 1.05                                                     | 3.16                                                                                   | 6.11                                                                                   | 4.8                                                                                           | 11.1                                                                                          | 3                                                                              | 3                                                                              | 6775    | 6558           | solute carrier family 12(sodium/potassium/chloride transporters), member 2                          | Auxiliary transport protein activity           | Plasma membrane        | Membrane transport protein              | Transport                                                        | TM          | Yes                      |
| MED15       | 51586   | mediator of RNA polymerase II transcription subunit 15 isoform a | NP_001003891.1    | 5          | 2                 | 2          | 2      | 0.87                                                     | 1.04                                                     |                                                                                        |                                                                                        |                                                                                               |                                                                                               | 1                                                                              | 1                                                                              | 12117   | 51586          | PC2 (positive cofactor 2, multiprotein complex)glutamine Q-rich-associated protein                  | Transcription regulator activity               | Cytoplasm              | Transcription regulatory protein        | Biological process unknown                                       | CC;NLS      | Yes                      |
| GTF3C2      | 2976    | general transcription factor 3C polypeptide 2                    | NP_001512.1       | 1          | 2                 | 2          | 2      | 0.87                                                     | 1.04                                                     | 1.3                                                                                    | 16.38                                                                                  | 1.6                                                                                           | 24.5                                                                                          | 2                                                                              | 2                                                                              | 5347    | 2976           | general transcription factor IIC', beta polypeptide2, beta 110kDa                                   | Transcription factor activity                  | Nucleus                | Transcription factor                    | Regulation of nucleobase, nucleotide and nucleic acid metabolism | WD40        | Yes                      |
| PRPS1       | 5631    | ribose-phosphate pyrophosphokinase 1 isoform 1                   | NP_002755.1       | 3          | 4                 | 11         | 26     | 0.87                                                     | 1.03                                                     | 7.57                                                                                   | 12.52                                                                                  | 13.3                                                                                          | 26.3                                                                                          | 4                                                                              | 4                                                                              | 2413    | 5631           | phosphoribosyl pyrophosphate synthetase 1                                                           | Ligase activity                                | -                      | Enzyme: Ligase                          | Metabolism;Energy pathways                                       | -           | Yes                      |
| DCXR        | 51181   | L-xylulose reductase isoform 1                                   | NP_057370.1       | 2          | 4                 | 4          | 6      | 0.87                                                     | 1.03                                                     | 6.18                                                                                   | 9                                                                                      | 9.3                                                                                           | 16.2                                                                                          | 3                                                                              | 3                                                                              | 16320   | 51181          | dicarbonyl-L-xylulose reductase                                                                     | Oxidoreductase activity                        | Integral to membrane   | Enzyme: Oxidoreductase                  | Metabolism;Energy pathways                                       | -           | Yes                      |
| FSCN1       | 6624    | fascin                                                           | NP_003079.1       | 1          | 33                | 33         | 179    | 0.87                                                     | 1.02                                                     | 2.23                                                                                   | 2.04                                                                                   | 18.5                                                                                          | 20                                                                                            | 89                                                                             | 89                                                                             | 4068    | 6624           | fascin homolog 1, actin-binding protein(Strongylocentrotus purpuratus)                              | Structural molecule activity                   | Cytoplasm              | Structural protein                      | Cell growth and/or maintenance                                   | -           | Yes                      |
| LRRCS7      | 255252  | leucine-rich repeat-containing protein 57                        | NP_694992.2       | 1          | 3                 | 3          | 13     | 0.87                                                     | 1.02                                                     | 8.06                                                                                   | 13.47                                                                                  | 18.7                                                                                          | 37.7                                                                                          | 7                                                                              | 7                                                                              | 8212    | 255252         | None                                                                                                | Molecular function unknown                     | -                      | Unclassified                            | Biological process unknown                                       | LRR         | No                       |
| TIMM22      | 29928   | mitochondrial import inner membrane translocase subunit Tim22    | NP_037469.2       | 1          | 1                 | 1          | 2      | 0.87                                                     | 1.01                                                     |                                                                                        |                                                                                        |                                                                                               |                                                                                               | 1                                                                              | 1                                                                              | 6262    | 29928          | translocase of inner mitochondrial membrane 22homolog (yeast)                                       | Transporter activity                           | Mitochondrial membrane | Transport/cargo protein                 | Transport                                                        | TM          | Yes                      |

Supplementary Table S1. List of quantified proteins in OKF6/TERT1-Smoke cells  
 Raigonalan et al., 2017. Role of protein kinase N2 (PKN2) in cigarette smoke-mediated oncogenic transformation of oral cells

| Gene Symbol | Gene ID | Protein Description                                                             | Protein Accession | # Proteins | # Unique Peptides | # Peptides | # PSMs | OKF6/TERT1-Smoke/<br>OKF6/TERT1-Parental<br>(130/126) R1 | OKF6/TERT1-Smoke/<br>OKF6/TERT1-Parental<br>(128/127) R2 | Ratio Standard Errors [%]:<br>OKF6/TERT1-Smoke/<br>OKF6/TERT1-Parental<br>(130/126) R1 | Ratio Standard Errors [%]:<br>OKF6/TERT1-Smoke/<br>OKF6/TERT1-Parental<br>(128/127) R2 | Ratio Variabilities [%]:<br>F13: OKF6/TERT1-<br>Smoke/<br>OKF6/TERT1-Parental<br>(130/126) R1 | Ratio Variabilities [%]:<br>F13: OKF6/TERT1-<br>Smoke/<br>OKF6/TERT1-Parental<br>(128/127) R2 | Ratio Counts: F13:<br>OKF6/TERT1-Smoke/<br>OKF6/TERT1-Parental<br>(130/126) R1 | Ratio Counts: F13:<br>OKF6/TERT1-Smoke/<br>OKF6/TERT1-Parental<br>(128/127) R2 | HFPR ID | Entrez<br>Gene ID | Gene Name                                                                               | Molecular<br>Function                        | Primary<br>Localization | Molecular Class                     | Biological<br>Process                                                        | Domains                         | Plasma<br>Proteome<br>Database |
|-------------|---------|---------------------------------------------------------------------------------|-------------------|------------|-------------------|------------|--------|----------------------------------------------------------|----------------------------------------------------------|----------------------------------------------------------------------------------------|----------------------------------------------------------------------------------------|-----------------------------------------------------------------------------------------------|-----------------------------------------------------------------------------------------------|--------------------------------------------------------------------------------|--------------------------------------------------------------------------------|---------|-------------------|-----------------------------------------------------------------------------------------|----------------------------------------------|-------------------------|-------------------------------------|------------------------------------------------------------------------------|---------------------------------|--------------------------------|
| CASK        | 8573    | peripheral plasma membrane protein CASK isoform 1                               | NP_003679.2       | 3          | 6                 | 6          | 7      | 0.87                                                     | 1.01                                                     | 7.82                                                                                   | 1.15                                                                                   | 13.6                                                                                          | 2.3                                                                                           | 4                                                                              | 4                                                                              | 2164    | 8573              | calcium/calmodulin-dependent serine protein kinase (MAGUK family)                       | Protein serine/threonine kinase activity     | Plasma membrane         | Serine/threonine kinase             | Cell communication;Signal transduction                                       | S.T_kinase;PDZ;SH3;GuKinase;L27 | Yes                            |
| HERC4       | 26091   | probable E3 ubiquitin-protein ligase HERC4 isoform a                            | NP_071362.1       | 4          | 5                 | 5          | 7      | 0.87                                                     | 1                                                        | 7.98                                                                                   | 7.4                                                                                    | 13.9                                                                                          | 14.9                                                                                          | 4                                                                              | 4                                                                              | 13646   | 26091             | hect domain and RLD 4                                                                   | Ubiquitin-specific protease activity         | Cytoplasm               | Ubiquitin proteasome system protein | Protein metabolism                                                           | HECT                            | Yes                            |
| FTTM2       | 128486  | fat storage-inducing transmembrane protein 2                                    | NP_001073941.1    | 1          | 1                 | 1          | 1      | 0.87                                                     | 1                                                        |                                                                                        |                                                                                        |                                                                                               |                                                                                               | 1                                                                              | 1                                                                              | 19101   | 128486            | chromosome 20 open reading frame 142                                                    | Molecular function unknown                   | -                       | Unclassified                        | Biological_process unknown                                                   | TM                              | Yes                            |
| GGPS1       | 9453    | geranylgeranyl pyrophosphate synthase                                           | NP_001032354.1    | 1          | 3                 | 3          | 7      | 0.87                                                     | 0.96                                                     | 5.91                                                                                   | 2.43                                                                                   | 10.3                                                                                          | 4.7                                                                                           | 4                                                                              | 4                                                                              | 6099    | 9453              | geranylgeranyl diphosphate synthase 1                                                   | Transferase activity                         | Cytoplasm               | Enzyme: Prenyltransferase           | Metabolism;Energy pathways                                                   | 3SEXO                           | Yes                            |
| ESD         | 2098    | S-formylglutathione hydrolase                                                   | NP_001975.1       | 1          | 12                | 12         | 39     | 0.87                                                     | 0.96                                                     | 3.4                                                                                    | 4.44                                                                                   | 14.3                                                                                          | 20.6                                                                                          | 23                                                                             | 23                                                                             | 588     | 2098              | esterase D-formylglutathione hydrolase                                                  | Hydrolase activity                           | Cytoplasm               | Enzyme: Esterase                    | Metabolism;Energy pathways                                                   | -                               | Yes                            |
| TMEM214     | 54867   | transmembrane protein 214 isoform 1                                             | NP_060197.4       | 2          | 3                 | 3          | 5      | 0.87                                                     | 0.96                                                     | 5.35                                                                                   | 13.75                                                                                  | 6.6                                                                                           | 18.7                                                                                          | 2                                                                              | 2                                                                              | 7887    | 54867             | None                                                                                    | Molecular function unknown                   | -                       | Unclassified                        | Biological_process unknown                                                   | -                               | No                             |
| THOC5       | 8563    | THO complex subunit 5 homolog                                                   | NP_003669.4       | 1          | 2                 | 2          | 3      | 0.87                                                     | 0.95                                                     | 6.04                                                                                   | 8                                                                                      | 7.5                                                                                           | 10.8                                                                                          | 2                                                                              | 2                                                                              | 16650   | 8563              | chromosome 22 open reading frame 19                                                     | Molecular function unknown                   | Nucleus                 | Unclassified                        | Biological_process unknown                                                   | NLS;LZ;WW                       | Yes                            |
| PFND5       | 5204    | prefoldin subunit 5 isoform alpha                                               | NP_002615.2       | 2          | 2                 | 2          | 5      | 0.87                                                     | 0.95                                                     | 0.02                                                                                   | 13.04                                                                                  | 0                                                                                             | 21.7                                                                                          | 3                                                                              | 3                                                                              | 5359    | 5204              | prefoldin 5                                                                             | Chaperone activity                           | Nucleus                 | Chaperone                           | Protein metabolism                                                           | CC                              | No                             |
| PCK2        | 5106    | phosphoenolpyruvate carboxykinase (GTP), mitochondrial isoform 1 precursor      | NP_004554.3       | 4          | 19                | 19         | 58     | 0.87                                                     | 0.95                                                     | 6.21                                                                                   | 3.52                                                                                   | 29.3                                                                                          | 18.1                                                                                          | 28                                                                             | 29                                                                             | 2026    | 5106              | phosphoenolpyruvate carboxykinase 2 (mitochondrial)                                     | Catalytic activity                           | Mitochondrion           | Enzyme: Phosphotransferase          | Metabolism;Energy pathways                                                   | -                               | Yes                            |
| L2HGDH      | 79944   | L-2-hydroxyglutarate dehydrogenase, mitochondrial precursor                     | NP_079160.1       | 1          | 3                 | 3          | 6      | 0.87                                                     | 0.94                                                     | 15.6                                                                                   | 10.52                                                                                  | 20.6                                                                                          | 17.3                                                                                          | 3                                                                              | 3                                                                              | 12640   | 79944             | L-2-hydroxyglutarate dehydrogenase                                                      | Catalytic activity                           | Mitochondrion           | Enzyme: Dehydrogenase               | Metabolism;Energy pathways                                                   | SP                              | No                             |
| SQRDL       | 58472   | sulfide:quinone oxidoreductase, mitochondrial                                   | NP_067022.1       | 1          | 26                | 26         | 130    | 0.87                                                     | 0.91                                                     | 4.3                                                                                    | 3.14                                                                                   | 32.3                                                                                          | 24.3                                                                                          | 71                                                                             | 71                                                                             | 18102   | 58472             | sulfide:quinone reductase-like (yeast)                                                  | Oxidoreductase activity                      | Mitochondrion           | Enzyme: Oxidoreductase              | Metabolism;Energy pathways                                                   | SP                              | Yes                            |
| UBA7        | 7318    | ubiquitin-like modifier-activating enzyme 7                                     | NP_003262.2       | 1          | 5                 | 5          | 10     | 0.87                                                     | 0.9                                                      | 27.05                                                                                  | 11.67                                                                                  | 56.1                                                                                          | 23.8                                                                                          | 5                                                                              | 5                                                                              | 1873    | 7318              | ubiquitin-activating enzyme E1-like                                                     | Ubiquitin-specific protease activity         | Cytoplasm               | Ubiquitin proteasome system protein | Protein metabolism                                                           | -                               | Yes                            |
| IMP1A       | 3612    | inositol monophosphatase 1 isoform 2                                            | NP_001138350.1    | 3          | 5                 | 5          | 8      | 0.87                                                     | 0.9                                                      | 11.88                                                                                  | 15.13                                                                                  | 23.4                                                                                          | 31.2                                                                                          | 5                                                                              | 5                                                                              | 3641    | 3612              | inositol(myo)-1(or 4)-monophosphatase 1                                                 | Phosphoprotein phosphatase activity          | Cytoplasm               | Enzyme: Phosphatase                 | Metabolism;Energy pathways                                                   | L_Phosphatase                   | Yes                            |
| BCKDHA      | 593     | 2-oxoisovalerate dehydrogenase subunit alpha, mitochondrial isoform 1 precursor | NP_000700.1       | 2          | 1                 | 1          | 2      | 0.87                                                     | 0.89                                                     |                                                                                        |                                                                                        |                                                                                               |                                                                                               | 1                                                                              | 1                                                                              | 2009    | 593               | branched chain keto acid dehydrogenase E1.alpha polypeptide (maple syrup urine disease) | Catalytic activity                           | Mitochondrion           | Enzyme: Dehydrogenase               | Metabolism;Energy pathways                                                   | SP                              | Yes                            |
| VAV2        | 7410    | guanine nucleotide exchange factor VAV2 isoform 1                               | NP_001127870.1    | 3          | 8                 | 8          | 17     | 0.87                                                     | 0.87                                                     | 11.16                                                                                  | 8.24                                                                                   | 26                                                                                            | 19.1                                                                                          | 7                                                                              | 7                                                                              | 2694    | 7410              | vav 2 oncogene                                                                          | Guanyl-nucleotide exchange factor activity   | Cytoplasm               | Guanine nucleotide exchange factor  | Cell communication;Signal transduction                                       | CH;RHOGGEF;PH;CL1;SH3;SH2;CC    | Yes                            |
| ABCB7       | 22      | ATP-binding cassette sub-family B member 7, mitochondrial isoform 1             | NP_004290.2       | 5          | 4                 | 4          | 10     | 0.87                                                     | 0.85                                                     | 10.16                                                                                  | 8.18                                                                                   | 19.9                                                                                          | 15.6                                                                                          | 5                                                                              | 5                                                                              | 2137    | 22                | ATP-binding cassette, sub-family B (MDR/TAP), member 7                                  | Transporter activity                         | Mitochondrion           | Transport/cargo protein             | Transport                                                                    | SP;TM                           | Yes                            |
| GDI2        | 2665    | rab GDP dissociation inhibitor beta isoform 1                                   | NP_001485.2       | 3          | 19                | 26         | 130    | 0.87                                                     | 0.85                                                     | 5.45                                                                                   | 6.42                                                                                   | 32                                                                                            | 36.9                                                                                          | 43                                                                             | 43                                                                             | 2863    | 2665              | GDP dissociation inhibitor 2                                                            | Auxiliary transport protein activity         | Cytoplasm               | Membrane transport protein          | Transport                                                                    | SP                              | Yes                            |
| BNIP1       | 662     | vesicle transport protein SEC20 isoform BNIP1-b                                 | NP_053582.2       | 4          | 2                 | 2          | 2      | 0.87                                                     | 0.84                                                     | 6.14                                                                                   | 12.29                                                                                  | 7.6                                                                                           | 14.6                                                                                          | 2                                                                              | 2                                                                              | 4480    | 662               | BCL2 adenovirus E1B 19kDa interacting protein 1                                         | Receptor signaling complex scaffold activity | Cytoplasm               | Adapter molecule                    | Apoptosis                                                                    | TM;CC;ANK;BH3                   | Yes                            |
| TROVE2      | 6738    | 60 kDa SS-A/Ro ribonucleoprotein isoform 2                                      | NP_004591.2       | 4          | 12                | 12         | 34     | 0.87                                                     | 0.83                                                     | 7.51                                                                                   | 4.57                                                                                   | 26.6                                                                                          | 15.3                                                                                          | 16                                                                             | 16                                                                             | 15964   | 6738              | Sjogren syndrome antigen A2 (60kDa);ribonucleoprotein autoantigen SS-A/Ro               | RNA binding                                  | Cytoplasm               | RNA binding protein                 | Regulation of nucleobase, nucleoside, nucleotide and nucleic acid metabolism | CC                              | Yes                            |
| NDUF9       | 4715    | NADH dehydrogenase (ubiquinone) 1 beta subcomplex subunit 9 isoform 1           | NP_004996.1       | 3          | 3                 | 3          | 4      | 0.87                                                     | 0.83                                                     | 9.16                                                                                   | 26.99                                                                                  | 11.3                                                                                          | 32.3                                                                                          | 2                                                                              | 2                                                                              | 3264    | 4715              | NADH dehydrogenase (ubiquinone) 1 beta subcomplex, 9, 22kDa                             | Oxidoreductase activity                      | Mitochondrion           | Enzyme: Oxidoreductase              | Metabolism;Energy pathways                                                   | CC                              | No                             |
| GSK3B       | 2932    | glycogen synthase kinase-3 beta isoform 1                                       | NP_002084.2       | 2          | 7                 | 9          | 26     | 0.87                                                     | 0.82                                                     | 10.31                                                                                  | 16.46                                                                                  | 24                                                                                            | 39.7                                                                                          | 7                                                                              | 8                                                                              | 5418    | 2932              | glycogen synthase kinase 3 beta                                                         | Protein serine/threonine kinase activity     | Cytoplasm;Nucleus       | Serine/threonine kinase             | Metabolism;Energy pathways                                                   | S_T_kinase                      | Yes                            |
| VCL         | 7414    | vinculin isoform meta-VCL                                                       | NP_054706.1       | 2          | 60                | 60         | 252    | 0.87                                                     | 0.81                                                     | 3.8                                                                                    | 4.28                                                                                   | 39.5                                                                                          | 41.6                                                                                          | 133                                                                            | 132                                                                            | 1900    | 7414              | vinculin                                                                                | Cytoskeletal protein binding                 | Cytoplasm               | Cytoskeletal associated protein     | Cell growth and/or maintenance                                               | CC                              | Yes                            |
| CPNE3       | 8895    | copine-3                                                                        | NP_003900.1       | 10         | 12                | 13         | 29     | 0.87                                                     | 0.8                                                      | 6.78                                                                                   | 9.01                                                                                   | 23.1                                                                                          | 28.4                                                                                          | 15                                                                             | 15                                                                             | 5016    | 8895              | copine III                                                                              | Transporter activity                         | Cytoplasm               | Transport/cargo protein             | Transport                                                                    | C2;VWA                          | Yes                            |
| KIAA1522    | 57648   | uncharacterized protein KIAA1522 isoform 1                                      | NP_065939.2       | 3          | 8                 | 8          | 15     | 0.87                                                     | 0.79                                                     | 8.6                                                                                    | 14.9                                                                                   | 22.7                                                                                          | 36.2                                                                                          | 9                                                                              | 9                                                                              | 18852   | 57648             | KIAA1522                                                                                | Molecular function unknown                   | -                       | Unclassified                        | Biological_process unknown                                                   | -                               | No                             |
| UGP2        | 7360    | UTP-glucose-1-phosphate uridylyltransferase isoform a                           | NP_006750.3       | 2          | 23                | 23         | 71     | 0.87                                                     | 0.78                                                     | 5.43                                                                                   | 4.19                                                                                   | 30.3                                                                                          | 20.7                                                                                          | 39                                                                             | 39                                                                             | 8934    | 7360              | UDP-glucose pyrophosphorylase 2                                                         | Nucleotidyltransferase activity              | -                       | Enzyme: Nucleotidyltransferase      | Metabolism;Energy pathways                                                   | -                               | Yes                            |
| AMZ2        | 51321   | archaemetzincin-2 isoform 1                                                     | NP_001275983.1    | 1          | 1                 | 1          | 1      | 0.87                                                     | 0.77                                                     |                                                                                        |                                                                                        |                                                                                               |                                                                                               | 1                                                                              | 1                                                                              | 14237   | 51321             | None                                                                                    | Metallopeptidase activity                    | -                       | Metallo protease                    | Protein metabolism                                                           | -                               | No                             |
| GF3C1       | 2975    | general transcription factor 3C polypeptide 1 isoform 1                         | NP_001511.2       | 2          | 4                 | 4          | 6      | 0.87                                                     | 0.77                                                     | 9.21                                                                                   | 14                                                                                     | 16.2                                                                                          | 21.9                                                                                          | 4                                                                              | 4                                                                              | 7540    | 2975              | general transcription factor IIC, polypeptide1, alpha 220kDa                            | Transcription factor activity                | Nucleus                 | Transcription factor                | Regulation of nucleobase, nucleoside, nucleotide and nucleic acid metabolism | -                               | Yes                            |
| MICU2       | 221154  | calcium uptake protein 2, mitochondrial                                         | NP_689939.1       | 1          | 1                 | 1          | 2      | 0.87                                                     | 0.77                                                     |                                                                                        |                                                                                        |                                                                                               |                                                                                               | 1                                                                              | 1                                                                              |         |                   |                                                                                         |                                              |                         |                                     |                                                                              |                                 |                                |
| TBCE        | 6905    | tubulin-specific chaperone E isoform b                                          | NP_001274730.1    | 3          | 6                 | 6          | 9      | 0.87                                                     | 0.75                                                     | 5.98                                                                                   | 4.23                                                                                   | 10.4                                                                                          | 6.3                                                                                           | 4                                                                              | 4                                                                              | 5381    | 6905              | tubulin-specific chaperone e                                                            | Chaperone activity                           | Cytoplasm               | Chaperone                           | Protein metabolism                                                           | -                               | No                             |
| CNN3        | 1266    | calponin-3 isoform 1                                                            | NP_001830.1       | 3          | 5                 | 6          | 10     | 0.87                                                     | 0.75                                                     | 5.91                                                                                   | 14.87                                                                                  | 10.3                                                                                          | 22.5                                                                                          | 4                                                                              | 4                                                                              | 3848    | 1266              | calponin 3, acidic                                                                      | Cytoskeletal protein binding                 | Cytoplasm               | Cytoskeletal associated protein     | Cell growth and/or maintenance                                               | CH                              | Yes                            |

Supplementary Table S1. List of quantified proteins in OKF6/TERT1-Smoke cells  
 Raingonalan *et al.*, 2017. Role of protein kinase N2 (PKN2) in cigarette smoke-mediated oncogenic transformation of oral cells

| Gene Symbol | Gene ID | Protein Description                                              | Protein Accession | # Proteins | # Unique Peptides | # Peptides | # PSMs | OKF6/TERT1-Smoke/<br>OKF6/TERT1-Parental<br>(130/126) R1 | OKF6/TERT1-Smoke/<br>OKF6/TERT1-Parental<br>(128/127) R2 | Ratio Standard Errors [%]:<br>OKF6/TERT1-Smoke/<br>OKF6/TERT1-Parental<br>(130/126) R1 | Ratio Standard Errors [%]:<br>OKF6/TERT1-Smoke/<br>OKF6/TERT1-Parental<br>(128/127) R2 | Ratio Variabilities [%]:<br>F13: OKF6/TERT1-<br>Smoke/<br>OKF6/TERT1-Parental<br>(130/126) R1 | Ratio Variabilities [%]:<br>F13: OKF6/TERT1-<br>Smoke/<br>OKF6/TERT1-Parental<br>(128/127) R2 | Ratio Counts: F13:<br>OKF6/TERT1-Smoke/<br>OKF6/TERT1-Parental<br>(130/126) R1 | Ratio Counts: F13:<br>OKF6/TERT1-Smoke/<br>OKF6/TERT1-Parental<br>(128/127) R2 | HPRD ID | Entrez Gene ID | Gene Name                                                               | Molecular Function                                     | Primary Localization  | Molecular Class                     | Biological Process                                                           | Domains           | Plasma Proteome Database |
|-------------|---------|------------------------------------------------------------------|-------------------|------------|-------------------|------------|--------|----------------------------------------------------------|----------------------------------------------------------|----------------------------------------------------------------------------------------|----------------------------------------------------------------------------------------|-----------------------------------------------------------------------------------------------|-----------------------------------------------------------------------------------------------|--------------------------------------------------------------------------------|--------------------------------------------------------------------------------|---------|----------------|-------------------------------------------------------------------------|--------------------------------------------------------|-----------------------|-------------------------------------|------------------------------------------------------------------------------|-------------------|--------------------------|
| UMC1        | 51720   | BRC1A-A complex subunit RAP80                                    | NP_057374.3       | 1          | 1                 | 1          | 2      | 0.87                                                     | 0.73                                                     |                                                                                        |                                                                                        |                                                                                               |                                                                                               | 1                                                                              | 1                                                                              | 11482   | 51720          | None                                                                    | Transcription regulator activity                       | Nucleus               | Transcription regulatory protein    | Regulation of nucleobase, nucleoside, nucleotide and nucleic acid metabolism | UIM,CC,NLS        | Yes                      |
| RAB38       | 23682   | ras-related protein Rab-38                                       | NP_071732.1       | 1          | 3                 | 5          | 15     | 0.87                                                     | 0.7                                                      | 0.16                                                                                   | 13.35                                                                                  | 0.2                                                                                           | 16.4                                                                                          | 3                                                                              | 3                                                                              | 5889    | 23682          | RAB38, member RAS oncogene family                                       | GTPase activity                                        | Cytoplasm             | GTPase                              | Cell communication;Signal transduction                                       | RAB               | Yes                      |
| TBC1D2B     | 23102   | TBC1 domain family member 2B isoform a                           | NP_653173.1       | 2          | 1                 | 1          | 2      | 0.87                                                     | 0.67                                                     |                                                                                        |                                                                                        |                                                                                               |                                                                                               | 1                                                                              | 1                                                                              | 8310    | 23102          | None                                                                    | Transcription regulator activity                       | -                     | Transcription regulatory protein    | Regulation of nucleobase, nucleoside, nucleotide and nucleic acid metabolism | CC,KRAB,PHET BC   | No                       |
| EEHD2       | 79180   | EF-hand domain-containing protein D2                             | NP_077305.2       | 4          | 9                 | 9          | 13     | 0.87                                                     | 0.67                                                     | 8.9                                                                                    | 16.86                                                                                  | 23.5                                                                                          | 34.7                                                                                          | 9                                                                              | 9                                                                              | 13266   | 79180          | EF hand domain family, member D2                                        | Molecular function unknown                             | Nucleus;Cytoplasm     | Unclassified                        | Biological process unknown                                                   | EF,CC             | Yes                      |
| ZC3H7A      | 29066   | zinc finger CCCH domain-containing protein 7A                    | NP_054872.2       | 1          | 1                 | 1          | 2      | 0.87                                                     | 0.64                                                     |                                                                                        |                                                                                        |                                                                                               |                                                                                               | 1                                                                              | 1                                                                              | 11694   | 29066          | zinc finger CCCH type containing 7A                                     | DNA binding                                            | Nucleus               | DNA binding protein                 | Regulation of nucleobase, nucleoside, nucleotide and nucleic acid metabolism | ZNFC2,ZNF_C3H1,CC | No                       |
| PSP1        | 11168   | PC4 and SFRS1-interacting protein isoform 2                      | NP_150091.2       | 2          | 3                 | 4          | 6      | 0.87                                                     | 0.62                                                     | 20.17                                                                                  | 1.24                                                                                   | 31.2                                                                                          | 1.3                                                                                           | 3                                                                              | 3                                                                              | 4688    | 11168          | PC4 and SFRS1 interacting protein 1                                     | Transcription regulator activity                       | Nucleus;Cytoplasm     | Transcription regulatory protein    | Regulation of nucleobase, nucleoside, nucleotide and nucleic acid metabolism | PWWP,CC,NLS       | Yes                      |
| DIABLO      | 56616   | diablo homolog, mitochondrial isoform 1 precursor                | NP_063940.1       | 6          | 7                 | 7          | 15     | 0.87                                                     | 0.59                                                     | 7.21                                                                                   | 19.18                                                                                  | 17.9                                                                                          | 32.6                                                                                          | 8                                                                              | 8                                                                              | 5560    | 56616          | diablo homolog (Drosophila)                                             | Caspase activator activity                             | Mitochondrion         | Cell cycle control protein          | Cell communication;Signal transduction;Apoptosis                             | CC,TM             | Yes                      |
| C5orf22     | 55322   | UPF0489 protein C5orf22                                          | NP_060826.2       | 1          | 3                 | 3          | 6      | 0.86                                                     | 1.98                                                     | 12.47                                                                                  | 22.56                                                                                  | 18.8                                                                                          | 90.4                                                                                          | 3                                                                              | 3                                                                              | 7740    | 55322          | None                                                                    | Molecular function unknown                             | -                     | Unclassified                        | Biological process unknown                                                   | -                 | No                       |
| IRF2BPL     | 64207   | interferon regulatory factor 2-binding protein-like              | NP_078772.1       | 1          | 2                 | 2          | 4      | 0.86                                                     | 1.61                                                     | 39.74                                                                                  | 20.79                                                                                  | 51.1                                                                                          | 50.1                                                                                          | 2                                                                              | 2                                                                              |         |                |                                                                         |                                                        |                       |                                     |                                                                              |                   |                          |
| ORMDL3      | 94103   | ORM1-like protein 3                                              | NP_644809.1       | 3          | 1                 | 1          | 3      | 0.86                                                     | 1.52                                                     | 7.08                                                                                   | 15.8                                                                                   | 8.7                                                                                           | 35                                                                                            | 2                                                                              | 2                                                                              | 17803   | 94103          | ORM1-like 3 (S. cerevisiae)                                             | Molecular function unknown                             | Endoplasmic reticulum | Integral membrane protein           | Protein metabolism                                                           | TM                | Yes                      |
| FAHD2A      | 51011   | farnylacetoacetate hydrolase domain containing protein 2A        | NP_057128.2       | 2          | 1                 | 1          | 3      | 0.86                                                     | 1.52                                                     | 11.16                                                                                  | 11.01                                                                                  | 13.6                                                                                          | 24                                                                                            | 2                                                                              | 2                                                                              | 13287   | 51011          | farnylacetoacetate hydrolase domain containing 2A                       | Molecular function unknown                             | -                     | Unclassified                        | Biological process unknown                                                   | -                 | No                       |
| URI1        | 8725    | unconventional prefolin RPB5 interactor 1 isoform a              | NP_003787.2       | 1          | 2                 | 2          | 3      | 0.86                                                     | 1.51                                                     | 19.74                                                                                  | 21.33                                                                                  | 24.5                                                                                          | 47.9                                                                                          | 2                                                                              | 2                                                                              |         |                |                                                                         |                                                        |                       |                                     |                                                                              |                   |                          |
| TP1         | 7167    | triphosphate isomerase isoform 2                                 | NP_001152759.1    | 3          | 19                | 19         | 123    | 0.86                                                     | 1.49                                                     | 3.49                                                                                   | 2.93                                                                                   | 24.6                                                                                          | 36.3                                                                                          | 65                                                                             | 65                                                                             | 1833    | 7167           | triphosphate isomerase 1                                                | Isomerase activity                                     | Cytoplasm             | Enzyme;Isomerase                    | Metabolism;Energy pathways                                                   | -                 | Yes                      |
| NDUFA4      | 4697    | cytochrome c oxidase subunit NDUFA4                              | NP_002480.1       | 1          | 2                 | 2          | 4      | 0.86                                                     | 1.47                                                     | 23.43                                                                                  | 26.49                                                                                  | 29.2                                                                                          | 59.5                                                                                          | 2                                                                              | 2                                                                              | 4831    | 4697           | NADH dehydrogenase (ubiquinone) 1 alpha subcomplex, 4-9kDa              | Oxidoreductase activity                                | Mitochondrion         | Enzyme;Oxidoreductase               | Metabolism;Energy pathways                                                   | TM                | No                       |
| ARPC5L      | 81873   | actin-related protein 2/3 complex subunit 5-like protein         | NP_112240.1       | 1          | 1                 | 1          | 2      | 0.86                                                     | 1.4                                                      |                                                                                        |                                                                                        |                                                                                               |                                                                                               | 1                                                                              | 1                                                                              | 12490   | 81873          | actin related protein 2/3 complex, subunit5-like                        | Molecular function unknown                             | -                     | Unclassified                        | Biological process unknown                                                   | -                 | No                       |
| MAPKAP1     | 79109   | target of rapamycin complex 2 subunit MAPKAP1 isoform 1          | NP_001006618.1    | 5          | 2                 | 2          | 3      | 0.86                                                     | 1.38                                                     | 2.12                                                                                   | 19.33                                                                                  | 2.6                                                                                           | 39.1                                                                                          | 2                                                                              | 2                                                                              | 17464   | 79109          | mitogen-activated protein kinase associated protein 1                   | Molecular function unknown;Kinase binding              | Cytoplasm             | Unclassified                        | Cell communication;Signal transduction                                       | -                 | Yes                      |
| RHEB        | 6009    | GTP-binding protein Rheb                                         | NP_005605.1       | 1          | 3                 | 3          | 7      | 0.86                                                     | 1.24                                                     | 18.12                                                                                  | 6.24                                                                                   | 36.1                                                                                          | 17.4                                                                                          | 5                                                                              | 5                                                                              | 3188    | 6009           | Ras homolog enriched in brain                                           | GTPase activity                                        | Plasma membrane       | GTPase                              | Cell communication;Signal transduction                                       | RAS               | Yes                      |
| UBE2L3      | 7332    | ubiquitin-conjugating enzyme E2 L3 isoform 4                     | NP_001243284.1    | 3          | 5                 | 5          | 13     | 0.86                                                     | 1.23                                                     | 6.95                                                                                   | 7.46                                                                                   | 15.9                                                                                          | 24.7                                                                                          | 7                                                                              | 7                                                                              | 4762    | 7332           | ubiquitin-conjugating enzyme E2L3                                       | Ubiquitin-specific protease activity;Ubiquitin binding | Cytoplasm             | Ubiquitin proteasome system protein | Protein metabolism                                                           | UBC               | Yes                      |
| MRPS23      | 51649   | 28S ribosomal protein S23, mitochondrial                         | NP_057154.2       | 1          | 4                 | 4          | 10     | 0.86                                                     | 1.19                                                     | 1.58                                                                                   | 5.54                                                                                   | 3                                                                                             | 14.8                                                                                          | 5                                                                              | 5                                                                              | 17592   | 51649          | mitochondrial ribosomal protein S23                                     | Structural constituent of ribosome                     | Mitochondrion         | Ribosomal subunit                   | Protein metabolism                                                           | -                 | Yes                      |
| LRRC1       | 55227   | leucine-rich repeat-containing protein 1                         | NP_060684.4       | 1          | 4                 | 5          | 11     | 0.86                                                     | 1.13                                                     | 20.93                                                                                  | 16.5                                                                                   | 31.9                                                                                          | 33                                                                                            | 3                                                                              | 3                                                                              | 6430    | 55227          | leucine rich repeat containing 1                                        | Molecular function unknown                             | -                     | Unclassified                        | Biological process unknown                                                   | LRR               | No                       |
| NUP205      | 23165   | nuclear pore complex protein Nup205                              | NP_055950.1       | 1          | 19                | 19         | 36     | 0.86                                                     | 1.11                                                     | 4.14                                                                                   | 4.42                                                                                   | 14.8                                                                                          | 20.5                                                                                          | 17                                                                             | 17                                                                             | 17653   | 23165          | nucleoporin 205kDa                                                      | Molecular function unknown                             | Nucleus               | Unclassified                        | Biological process unknown                                                   | -                 | Yes                      |
| ARAF        | 369     | serine/threonine-protein kinase A-Raf isoform 2                  | NP_001243125.1    | 4          | 2                 | 3          | 5      | 0.86                                                     | 1.11                                                     | 30.22                                                                                  | 8.43                                                                                   | 38.1                                                                                          | 13.3                                                                                          | 2                                                                              | 2                                                                              | 2405    | 369            | v-raf murine sarcoma 3611 viral oncogene homolog                        | Protein serine/threonine kinase activity               | Cytoplasm             | Serine/threonine kinase             | Cell communication;Signal transduction                                       | RBD,C1,S_T_kinase | Yes                      |
| ELOVL7      | 79993   | elongation of very long chain fatty acids protein 7 isoform 1    | NP_079206.2       | 1          | 1                 | 1          | 2      | 0.86                                                     | 1.11                                                     | 18.91                                                                                  | 2.64                                                                                   | 23.4                                                                                          | 4.1                                                                                           | 2                                                                              | 2                                                                              | 18700   | 79993          | ELOVL family member 7, elongation of long chain fatty acids (yeast)     | Molecular function unknown                             | -                     | Unclassified                        | Biological process unknown                                                   | TM                | No                       |
| MED23       | 9439    | mediator of RNA polymerase II transcription subunit 23 isoform a | NP_004821.2       | 4          | 2                 | 2          | 3      | 0.86                                                     | 1.1                                                      | 2.7                                                                                    | 9.18                                                                                   | 3.3                                                                                           | 14.3                                                                                          | 2                                                                              | 2                                                                              | 5436    | 9439           | cofactor required for Sp1 transcriptional activation, subunit 3, 130kDa | Transcription regulator activity                       | Nucleus               | Transcription regulatory protein    | Regulation of nucleobase, nucleoside, nucleotide and nucleic acid metabolism | -                 | Yes                      |
| ATG3        | 64422   | ubiquitin-like-conjugating enzyme ATG3 isoform 1                 | NP_071933.2       | 2          | 5                 | 5          | 15     | 0.86                                                     | 1.07                                                     | 4.18                                                                                   | 5.17                                                                                   | 10.2                                                                                          | 15.7                                                                                          | 8                                                                              | 8                                                                              | 10654   | 64422          | APG3 autophagy 3-like (S. cerevisiae)                                   | Molecular function unknown                             | Cytoplasm             | Unclassified                        | Biological process unknown                                                   | -                 | No                       |
| GOLGA1      | 2800    | Golgi subfamily A member 1                                       | NP_002068.1       | 1          | 2                 | 2          | 2      | 0.86                                                     | 1.05                                                     |                                                                                        |                                                                                        |                                                                                               |                                                                                               | 1                                                                              | 1                                                                              | 3934    | 2800           | golgi autoantigen, golgi subfamily a, 1                                 | Structural molecule activity                           | Golgi apparatus       | Structural protein                  | Cell growth and/or maintenance                                               | CC,SPECTRIN       | Yes                      |

Supplementary Table S1. List of quantified proteins in OKF6/TERT1-Smoke cells  
 Raigopalán *et al.*, 2017. Role of protein kinase N2 (PKN2) in cigarette smoke-mediated oncogenic transformation of oral cells

| Gene Symbol | Gene ID | Protein Description                                                          | Protein Accession | # Proteins | # Unique Peptides | # Peptides | # PSMs | OKF6/TERT1-Smoke/<br>OKF6/TERT1-Parental<br>(130/126) R1 | OKF6/TERT1-Smoke/<br>OKF6/TERT1-Parental<br>(128/127) R2 | Ratio Standard Errors [%]:<br>OKF6/TERT1-Smoke/<br>OKF6/TERT1-Parental<br>(130/126) R1 | Ratio Standard Errors [%]:<br>OKF6/TERT1-Smoke/<br>OKF6/TERT1-Parental<br>(128/127) R2 | Ratio Variabilities [%]:<br>F13: OKF6/TERT1-<br>Smoke/<br>OKF6/TERT1-Parental<br>(130/126) R1 | Ratio Variabilities [%]:<br>F13: OKF6/TERT1-<br>Smoke/<br>OKF6/TERT1-Parental<br>(128/127) R2 | Ratio Counts: F13:<br>OKF6/TERT1-Smoke/<br>OKF6/TERT1-Parental<br>(130/126) R1 | Ratio Counts: F13:<br>OKF6/TERT1-Smoke/<br>OKF6/TERT1-Parental<br>(128/127) R2 | HPRD ID | Entrez Gene ID | Gene Name                                                        | Molecular Function                           | Primary Localization | Molecular Class                  | Biological Process                                               | Domains   | Plasma Proteome Database |
|-------------|---------|------------------------------------------------------------------------------|-------------------|------------|-------------------|------------|--------|----------------------------------------------------------|----------------------------------------------------------|----------------------------------------------------------------------------------------|----------------------------------------------------------------------------------------|-----------------------------------------------------------------------------------------------|-----------------------------------------------------------------------------------------------|--------------------------------------------------------------------------------|--------------------------------------------------------------------------------|---------|----------------|------------------------------------------------------------------|----------------------------------------------|----------------------|----------------------------------|------------------------------------------------------------------|-----------|--------------------------|
| NSUN5       | 55695   | probable 28S rRNA (cytosine-C5)-methyltransferase isoform 3                  | NP_001161819.1    | 4          | 3                 | 3          | 3      | 0.86                                                     | 1.05                                                     | 7.48                                                                                   | 3.23                                                                                   | 11.2                                                                                          | 5.9                                                                                           | 3                                                                              | 3                                                                              | 11678   | 55695          | NOLI/NOP2/Sun domain family, member 5                            | Molecular function unknown                   | -                    | Cell cycle control protein       | Cell growth and/or maintenance                                   | SP        | No                       |
| SUCLG1      | 8802    | succinyl-CoA ligase [ADP/GDP-forming] subunit alpha, mitochondrial precursor | NP_003840.2       | 1          | 5                 | 5          | 8      | 0.86                                                     | 1.04                                                     | 8.94                                                                                   | 17.16                                                                                  | 15.4                                                                                          | 37                                                                                            | 4                                                                              | 4                                                                              | 18128   | 8802           | succinate-CoA ligase, GDP-forming, alpha subunit                 | Ligase activity                              | Mitochondrion        | Enzyme: Ligase                   | Metabolism;Energy pathways                                       | -         | Yes                      |
| NRD1        | 4898    | nardilysin isoform a                                                         | NP_002516.2       | 3          | 10                | 10         | 21     | 0.86                                                     | 1.04                                                     | 8.28                                                                                   | 9.46                                                                                   | 26.1                                                                                          | 36.7                                                                                          | 13                                                                             | 13                                                                             | 4036    | 4898           | nardilysin (N-arginine dibasic convertase)                       | Metallopeptidase activity                    | Plasma membrane      | Metallo protease                 | Protein metabolism                                               | CC        | Yes                      |
| CRNKL1      | 51340   | crooked neck-like protein 1 isoform a                                        | NP_057736.4       | 4          | 4                 | 4          | 8      | 0.86                                                     | 1.02                                                     | 8.11                                                                                   | 3.93                                                                                   | 14.1                                                                                          | 8.1                                                                                           | 4                                                                              | 4                                                                              | 9898    | 51340          | Crn, crooked neck like 1 (Drosophila)                            | RNA binding                                  | Nucleus              | RNA binding protein              | Regulation of nucleobase, nucleotide and nucleic acid metabolism | CC,HAT    | Yes                      |
| MRPL11      | 65003   | 39S ribosomal protein L11, mitochondrial isoform a                           | NP_057134.1       | 3          | 8                 | 8          | 18     | 0.86                                                     | 1.01                                                     | 3.81                                                                                   | 10.13                                                                                  | 10.4                                                                                          | 33.4                                                                                          | 10                                                                             | 10                                                                             | 14739   | 65003          | mitochondrial ribosomal protein L11                              | Structural constituent of ribosome           | Mitochondrion        | Ribosomal subunit                | Protein metabolism                                               | -         | Yes                      |
| FABP5       | 2171    | fatty acid-binding protein, epidermal                                        | NP_001435.1       | 1          | 4                 | 4          | 8      | 0.86                                                     | 1.01                                                     | 9.59                                                                                   | 1.02                                                                                   | 16.6                                                                                          | 2                                                                                             | 4                                                                              | 4                                                                              | 5524    | 2171           | fatty acid binding protein 5 (psoriasis-associated)              | Transporter activity                         | Cytoplasm            | Transport/cargo protein          | Transport                                                        | -         | Yes                      |
| ACTR3       | 10096   | actin-related protein 3 isoform 1                                            | NP_005712.1       | 5          | 21                | 21         | 113    | 0.86                                                     | 1                                                        | 3.92                                                                                   | 3.15                                                                                   | 26.2                                                                                          | 24.4                                                                                          | 58                                                                             | 58                                                                             | 5024    | 10096          | ARP3 actin-related protein 3 homolog (yeast)                     | Structural constituent of cytoskeleton       | Cytoplasm            | Cytoskeletal protein             | Cell growth and/or maintenance                                   | ACTIN     | Yes                      |
| TMEM167A    | 153339  | protein kish-A precursor                                                     | NP_777569.1       | 1          | 2                 | 2          | 3      | 0.86                                                     | 0.99                                                     |                                                                                        |                                                                                        |                                                                                               |                                                                                               | 1                                                                              | 1                                                                              | 14490   | 153339         | None                                                             | Molecular function unknown                   | -                    | Integral membrane protein        | Biological process unknown                                       | SP,TM     | No                       |
| CARD6       | 84674   | caspase recruitment domain-containing protein 6                              | NP_115976.2       | 1          | 2                 | 2          | 6      | 0.86                                                     | 0.99                                                     | 8.99                                                                                   | 3.6                                                                                    | 13.4                                                                                          | 6.2                                                                                           | 3                                                                              | 3                                                                              | 9871    | 84674          | caspase recruitment domain family, member 6                      | Receptor signaling complex scaffold activity | Cytoplasm            | Adapter molecule                 | Cell communication;Signal transduction                           | CARD      | Yes                      |
| SC5D        | 6309    | lathosterol oxidase                                                          | NP_008849.2       | 1          | 1                 | 1          | 1      | 0.86                                                     | 0.99                                                     |                                                                                        |                                                                                        |                                                                                               |                                                                                               | 1                                                                              | 1                                                                              |         |                |                                                                  |                                              |                      |                                  |                                                                  |           |                          |
| TOMM20      | 9804    | mitochondrial import receptor subunit TOM20 homolog                          | NP_055580.1       | 1          | 1                 | 1          | 4      | 0.86                                                     | 0.99                                                     | 14.61                                                                                  | 12.27                                                                                  | 17.9                                                                                          | 17.3                                                                                          | 2                                                                              | 2                                                                              | 3507    | 9804           | translocase of outer mitochondrial membrane 20homolog (yeast)    | Auxiliary transport protein activity         | Mitochondrion        | Membrane transport protein       | Transport                                                        | TM        | No                       |
| SEN3        | 26168   | senrin-specific protease 3                                                   | NP_056485.2       | 1          | 2                 | 2          | 2      | 0.86                                                     | 0.99                                                     |                                                                                        |                                                                                        |                                                                                               |                                                                                               | 1                                                                              | 1                                                                              | 8339    | 26168          | SUMO1/senrin/SMT3 specific protease 3                            | Peptidase activity                           | Nucleolus            | Protease                         | Protein metabolism                                               | CC        | Yes                      |
| XYL2        | 64132   | xylosyltransferase 2                                                         | NP_071450.2       | 1          | 1                 | 1          | 3      | 0.86                                                     | 0.98                                                     | 0.19                                                                                   | 5.4                                                                                    | 0.2                                                                                           | 7.5                                                                                           | 2                                                                              | 2                                                                              | 16286   | 64132          | xylosyltransferase II                                            | Transferase activity                         | Extracellular        | Enzyme: Transferase              | Metabolism;Energy pathways                                       | SP        | Yes                      |
| FAM129A     | 116496  | protein Niban                                                                | NP_443198.1       | 1          | 14                | 14         | 42     | 0.86                                                     | 0.98                                                     | 7.99                                                                                   | 4.53                                                                                   | 33.1                                                                                          | 21                                                                                            | 22                                                                             | 22                                                                             | 10725   | 116496         | chromosome 1 open reading frame 24                               | Molecular function unknown                   | -                    | Unclassified                     | Biological process unknown                                       | CC        | Yes                      |
| RPL26L1     | 51121   | 60S ribosomal protein L26-like 1                                             | NP_057177.1       | 2          | 10                | 10         | 23     | 0.86                                                     | 0.98                                                     | 17.52                                                                                  | 20.87                                                                                  | 58.6                                                                                          | 85                                                                                            | 13                                                                             | 13                                                                             | 17993   | 51121          | ribosomal protein L26-like 1                                     | Molecular function unknown                   | Ribosome             | Unclassified                     | Biological process unknown                                       | KOW       | Yes                      |
| STRN        | 6801    | striatin                                                                     | NP_003153.2       | 1          | 8                 | 8          | 16     | 0.86                                                     | 0.97                                                     | 4.54                                                                                   | 7.32                                                                                   | 11.1                                                                                          | 20.2                                                                                          | 8                                                                              | 8                                                                              | 18124   | 6801           | striatin, calmodulin binding protein                             | Molecular function unknown                   | Cytoplasm            | Unclassified                     | Cell communication;Signal transduction                           | CC;WD40   | Yes                      |
| SUMO2       | 6613    | small ubiquitin-related modifier 2 isoform a precursor                       | NP_008868.3       | 3          | 1                 | 2          | 11     | 0.86                                                     | 0.97                                                     | 1.28                                                                                   | 3.16                                                                                   | 1.6                                                                                           | 4.3                                                                                           | 2                                                                              | 2                                                                              | 4332    | 6613           | SMT3 suppressor of mit two 3 homolog 2 (yeast)                   | Molecular function unknown                   | Nucleus              | Unclassified                     | Biological process unknown                                       | UBQ       | No                       |
| NEDD1       | 121441  | protein NEDD1 isoform a                                                      | NP_001128647.1    | 3          | 1                 | 1          | 2      | 0.86                                                     | 0.96                                                     |                                                                                        |                                                                                        |                                                                                               |                                                                                               | 1                                                                              | 1                                                                              | 2655    | 121441         | neural precursor cell expressed developmentally down-regulated 1 | Molecular function unknown                   | -                    | Unclassified                     | Cell communication;Signal transduction                           | WD40      | No                       |
| EHP1        | 23301   | EH domain-binding protein 1 isoform 1                                        | NP_056067.2       | 3          | 8                 | 8          | 18     | 0.86                                                     | 0.96                                                     | 8.84                                                                                   | 2.33                                                                                   | 21.7                                                                                          | 6.4                                                                                           | 8                                                                              | 8                                                                              | 10109   | 23301          | EH domain binding protein 1                                      | Molecular function unknown                   | -                    | Unclassified                     | Biological process unknown                                       | CH,CC     | Yes                      |
| NPM3        | 10360   | nucleoplasm-in-3                                                             | NP_008924.1       | 1          | 4                 | 4          | 13     | 0.86                                                     | 0.96                                                     | 10.43                                                                                  | 6.7                                                                                    | 22.2                                                                                          | 15.8                                                                                          | 6                                                                              | 6                                                                              | 7346    | 10360          | nucleoplasm-in-3 clecplasm-in, 3                                 | Chaperone activity                           | Nucleus              | Chaperone                        | Protein metabolism                                               | -         | Yes                      |
| CUX1        | 1523    | protein CASP isoform b                                                       | NP_001904.2       | 7          | 4                 | 4          | 7      | 0.86                                                     | 0.95                                                     | 4.46                                                                                   | 3.62                                                                                   | 7.7                                                                                           | 6.9                                                                                           | 4                                                                              | 4                                                                              | 295     | 1523           | cut-like 1, CCAAT displacement protein(Drosophila)               | Transcription regulator activity             | Nucleus              | Transcription regulatory protein | Regulation of nucleobase, nucleotide and nucleic acid metabolism | CC;HOX;TM | Yes                      |
| JUNB        | 3726    | transcription factor jun-B                                                   | NP_002220.1       | 1          | 6                 | 6          | 19     | 0.86                                                     | 0.95                                                     | 2.2                                                                                    | 8.56                                                                                   | 6                                                                                             | 26.2                                                                                          | 10                                                                             | 10                                                                             | 1303    | 3726           | jun B proto-oncogene                                             | Transcription factor activity                | Nucleus              | Transcription factor             | Regulation of nucleobase, nucleotide and nucleic acid metabolism | BRLZ,CC   | Yes                      |
| FNTA        | 2339    | protein farnesyltransferase/geranyltransferase type-1 subunit alpha          | NP_002018.1       | 1          | 5                 | 5          | 11     | 0.86                                                     | 0.95                                                     | 7.29                                                                                   | 5.86                                                                                   | 15.5                                                                                          | 13.8                                                                                          | 6                                                                              | 6                                                                              | 607     | 2339           | farnesyltransferase, CAAX box, alpha                             | Transferase activity                         | Cytoplasm            | Enzyme: Transferase              | Protein modification                                             | CC        | Yes                      |
| RP2         | 6102    | protein XRP2                                                                 | NP_008846.2       | 1          | 2                 | 2          | 5      | 0.86                                                     | 0.94                                                     | 20.55                                                                                  | 3.73                                                                                   | 31.4                                                                                          | 6                                                                                             | 3                                                                              | 3                                                                              | 2424    | 6102           | retinitis pigmentosa 2 (X-linked recessive)                      | Structural molecule activity                 | Plasma membrane      | Structural protein               | Cell growth and/or maintenance                                   | CARP      | Yes                      |
| HK1         | 3098    | hexokinase-1 isoform HK1-tatb                                                | NP_277033.1       | 6          | 34                | 37         | 128    | 0.86                                                     | 0.94                                                     | 3.35                                                                                   | 3.37                                                                                   | 23.1                                                                                          | 25.5                                                                                          | 63                                                                             | 63                                                                             | 809     | 3098           | hexokinase 1                                                     | Catalytic activity                           | Cytoplasm            | Enzyme: Sugar phosphotransferase | Metabolism;Energy pathways                                       | -         | Yes                      |
| ADK         | 132     | adenosine kinase isoform b                                                   | NP_006712.2       | 4          | 13                | 13         | 28     | 0.86                                                     | 0.93                                                     | 5.25                                                                                   | 10.5                                                                                   | 17.6                                                                                          | 39.3                                                                                          | 15                                                                             | 15                                                                             | 39      | 132            | adenosine kinase                                                 | Catalytic activity                           | Cytoplasm            | Enzyme: Phosphotransferase       | Regulation of nucleobase, nucleotide and nucleic acid metabolism | -         | Yes                      |
| RPS5        | 6193    | 40S ribosomal protein S5                                                     | NP_001000.2       | 1          | 10                | 10         | 64     | 0.86                                                     | 0.9                                                      | 3.44                                                                                   | 4.69                                                                                   | 17                                                                                            | 24.7                                                                                          | 33                                                                             | 33                                                                             | 4695    | 6193           | ribosomal protein S5                                             | Structural constituent of ribosome           | Ribosome             | Ribosomal subunit                | Protein metabolism                                               | -         | Yes                      |
| MRPS2       | 51116   | 28S ribosomal protein S2, mitochondrial                                      | NP_057118.1       | 1          | 4                 | 4          | 6      | 0.86                                                     | 0.9                                                      | 13.54                                                                                  | 28.68                                                                                  | 23.6                                                                                          | 55.4                                                                                          | 4                                                                              | 4                                                                              | 14783   | 51116          | mitochondrial ribosomal protein S2                               | Structural constituent of ribosome           | Mitochondrion        | Ribosomal subunit                | Protein metabolism                                               | -         | Yes                      |
| GCN1L1      | 10985   | translational activator GCN1                                                 | NP_006827.1       | 1          | 67                | 67         | 175    | 0.86                                                     | 0.88                                                     | 2.77                                                                                   | 3.29                                                                                   | 22.6                                                                                          | 27.7                                                                                          | 87                                                                             | 87                                                                             | 16127   | 10985          | GCN1 general control of amino acid synthesis-like 1 (yeast)      | Translation regulator activity               | Nucleolus            | Translation regulatory protein   | Protein metabolism                                               | HRI,CC    | Yes                      |

Supplementary Table S1. List of quantified proteins in OKF6/TERT1-Smoke cells  
 Raingopaln *et al.*, 2017. Role of protein kinase N2 (PKN2) in cigarette smoke-mediated oncogenic transformation of oral cells

| Gene Symbol | Gene ID | Protein Description                                                    | Protein Accession | # Proteins | # Unique Peptides | # Peptides | # PSMs | OKF6/TERT1-Smoke/<br>OKF6/TERT1-Parental<br>(130/126) R1 | OKF6/TERT1-Smoke/<br>OKF6/TERT1-Parental<br>(128/127) R2 | Ratio Standard Errors [%]:<br>OKF6/TERT1-Smoke/<br>OKF6/TERT1-Parental<br>(130/126) R1 | Ratio Standard Errors [%]:<br>OKF6/TERT1-Smoke/<br>OKF6/TERT1-Parental<br>(128/127) R2 | Ratio Variabilities [%]:<br>F13: OKF6/TERT1-<br>Smoke/<br>OKF6/TERT1-Parental<br>(130/126) R1 | Ratio Variabilities [%]:<br>F13: OKF6/TERT1-<br>Smoke/<br>OKF6/TERT1-Parental<br>(128/127) R2 | Ratio Counts: F13:<br>OKF6/TERT1-Smoke/<br>OKF6/TERT1-Parental<br>(130/126) R1 | Ratio Counts: F13:<br>OKF6/TERT1-Smoke/<br>OKF6/TERT1-Parental<br>(128/127) R2 | HPRD ID | Entrez Gene Id | Gene Name                                                                                       | Molecular Function                           | Primary Localization        | Molecular Class                 | Biological Process                                                              | Domains                       | Plasma Proteome Database |
|-------------|---------|------------------------------------------------------------------------|-------------------|------------|-------------------|------------|--------|----------------------------------------------------------|----------------------------------------------------------|----------------------------------------------------------------------------------------|----------------------------------------------------------------------------------------|-----------------------------------------------------------------------------------------------|-----------------------------------------------------------------------------------------------|--------------------------------------------------------------------------------|--------------------------------------------------------------------------------|---------|----------------|-------------------------------------------------------------------------------------------------|----------------------------------------------|-----------------------------|---------------------------------|---------------------------------------------------------------------------------|-------------------------------|--------------------------|
| NDUFA1      | 51103   | complex I intermediate-associated protein 30, mitochondrial precursor  | NP_057097.2       | 1          | 1                 | 1          | 2      | 0.86                                                     | 0.88                                                     |                                                                                        |                                                                                        |                                                                                               |                                                                                               | 1                                                                              | 1                                                                              | 9500    | 51103          | NADH dehydrogenase (ubiquinone) 1 alpha subcomplex, assembly factor 1                           | Chaperone activity                           | Mitochondrion               | Chaperone                       | Biological process unknown                                                      | -                             | No                       |
| GPD2        | 2820    | glycerol-3-phosphate dehydrogenase, mitochondrial precursor            | NP_001076581.2    | 1          | 22                | 22         | 65     | 0.86                                                     | 0.87                                                     | 4.44                                                                                   | 3.71                                                                                   | 22.9                                                                                          | 19.3                                                                                          | 35                                                                             | 35                                                                             | 715     | 2820           | glycerol-3-phosphate dehydrogenase 2(mitochondrial)                                             | Catalytic activity                           | Mitochondrion               | Enzyme: Dehydrogenase           | Metabolism;Energy pathways                                                      | EF;TM                         | Yes                      |
| NDUFS1      | 4719    | NADH-ubiquinone oxidoreductase 75 kDa subunit, mitochondrial isoform 5 | NP_001186913.1    | 5          | 23                | 23         | 81     | 0.86                                                     | 0.86                                                     | 4.06                                                                                   | 5.46                                                                                   | 23.9                                                                                          | 32.4                                                                                          | 45                                                                             | 45                                                                             | 1145    | 4719           | NADH dehydrogenase (ubiquinone) Fe-S protein, 75kDa (NADH-coenzyme Q reductase)                 | Oxidoreductase activity                      | Mitochondrion               | Enzyme: Oxidoreductase          | Metabolism;Energy pathways                                                      | -                             | Yes                      |
| TCP11L1     | 55346   | T-complex protein 11-like protein 1                                    | NP_001139013.1    | 1          | 1                 | 1          | 1      | 0.86                                                     | 0.85                                                     |                                                                                        |                                                                                        |                                                                                               |                                                                                               | 1                                                                              | 1                                                                              | 7750    | 55346          | None                                                                                            | Molecular function unknown                   | -                           | Unclassified                    | Biological process unknown                                                      | -                             | Yes                      |
| LAMA5       | 3911    | laminin subunit alpha-5 precursor                                      | NP_005551.3       | 1          | 8                 | 8          | 27     | 0.86                                                     | 0.85                                                     | 4.16                                                                                   | 5.84                                                                                   | 13.5                                                                                          | 18.7                                                                                          | 14                                                                             | 14                                                                             | 3020    | 3911           | laminin, alpha 5                                                                                | Cell adhesion molecule activity              | Extracellular               | Adhesion molecule               | Cell growth and/or maintenance                                                  | LAMNT;EGFLA;MLAMB1;LAMG;SP;CC | Yes                      |
| CASP7       | 840     | caspase-7 isoform delta                                                | NP_203124.1       | 5          | 2                 | 2          | 3      | 0.86                                                     | 0.83                                                     | 0.91                                                                                   | 23.55                                                                                  | 1.1                                                                                           | 28.1                                                                                          | 2                                                                              | 2                                                                              | 3457    | 840            | caspase 7, apoptosis-related cysteine protease                                                  | Cysteine-type peptidase activity             | Cytoplasm                   | Cysteine protease               | Apoptosis                                                                       | CASC                          | Yes                      |
| UPF2        | 26019   | regulator of nonsense transcripts 2                                    | NP_542166.1       | 1          | 6                 | 6          | 12     | 0.86                                                     | 0.83                                                     | 5.64                                                                                   | 14.77                                                                                  | 12                                                                                            | 30.6                                                                                          | 6                                                                              | 6                                                                              | 10405   | 26019          | UPF2 regulator of nonsense transcripts homolog(yeast)                                           | RNA binding;MRNA binding                     | Cytoplasm                   | RNA binding protein             | Regulation of nucleosome, nucleotide and nucleic acid metabolism;RNA metabolism | CC;MIFAG                      | Yes                      |
| STAMPB      | 10617   | STAM-binding protein                                                   | NP_006454.1       | 1          | 5                 | 5          | 7      | 0.86                                                     | 0.82                                                     | 17.38                                                                                  | 17.04                                                                                  | 34.6                                                                                          | 31.9                                                                                          | 5                                                                              | 5                                                                              | 5877    | 10617          | STAM binding protein                                                                            | Receptor signaling complex scaffold activity | Cytoplasm                   | Adapter molecule                | Cell communication;Signal transduction                                          | JAB;CC                        | No                       |
| PRKCD       | 5580    | protein kinase C delta type                                            | NP_006245.2       | 1          | 5                 | 5          | 9      | 0.86                                                     | 0.81                                                     | 12.74                                                                                  | 5.94                                                                                   | 25                                                                                            | 10.8                                                                                          | 5                                                                              | 5                                                                              | 1501    | 5580           | protein kinase C, delta                                                                         | Protein serine/threonine kinase activity     | Cytosol                     | Serine/threonine kinase         | Cell communication;Signal transduction                                          | C2;C1;S_T_kinase              | Yes                      |
| DTD1        | 92675   | D-tyrosyl-tRNA(Tyr) deacylase 1                                        | NP_543010.3       | 1          | 2                 | 2          | 5      | 0.86                                                     | 0.8                                                      | 13.26                                                                                  | 27.8                                                                                   | 20                                                                                            | 39.9                                                                                          | 3                                                                              | 3                                                                              | 13631   | 92675          | histidyl-tRNA synthetase 2                                                                      | ATPase activity                              | Nucleus                     | Enzyme: Ligase                  | Metabolism;Energy pathways                                                      | -                             | Yes                      |
| RPL15       | 6138    | 60S ribosomal protein L15 isoform 1                                    | NP_002939.2       | 2          | 8                 | 8          | 34     | 0.86                                                     | 0.8                                                      | 6.62                                                                                   | 6.84                                                                                   | 25.2                                                                                          | 24.1                                                                                          | 19                                                                             | 19                                                                             | 16043   | 6138           | ribosomal protein L15                                                                           | Structural constituent of ribosome           | Ribosome                    | Ribosomal subunit               | Protein metabolism                                                              | -                             | Yes                      |
| SFXN1       | 94081   | sideroflexin-1                                                         | NP_073591.2       | 1          | 13                | 15         | 48     | 0.86                                                     | 0.79                                                     | 5.08                                                                                   | 9.01                                                                                   | 22.7                                                                                          | 37.7                                                                                          | 26                                                                             | 26                                                                             | 18044   | 94081          | sideroflexin 1                                                                                  | Transporter activity                         | Mitochondrion               | Transport/cargo protein         | Transport                                                                       | TM                            | Yes                      |
| CCDC8       | 83987   | coiled-coil domain-containing protein 8                                | NP_114429.2       | 1          | 3                 | 3          | 10     | 0.86                                                     | 0.79                                                     | 17.82                                                                                  | 13.23                                                                                  | 35.4                                                                                          | 23.7                                                                                          | 5                                                                              | 5                                                                              | 13009   | 83987          | coiled-coil domain containing 8                                                                 | Molecular function unknown                   | -                           | Unclassified                    | Biological process unknown                                                      | -                             | Yes                      |
| ESYT2       | 57488   | extended synaptotagmin-2                                               | NP_065779.1       | 1          | 15                | 15         | 46     | 0.86                                                     | 0.79                                                     | 5.07                                                                                   | 6.8                                                                                    | 22.1                                                                                          | 27.5                                                                                          | 25                                                                             | 25                                                                             | 13053   | 57488          | family with sequence similarity 62 (C2 domain-containing) member B                              | Molecular function unknown                   | Mitochondrion               | Unclassified                    | Biological process unknown                                                      | TM;C2                         | Yes                      |
| TMEM115     | 11070   | transmembrane protein 115                                              | NP_008955.1       | 1          | 2                 | 2          | 5      | 0.86                                                     | 0.77                                                     | 21.46                                                                                  | 7.93                                                                                   | 32.8                                                                                          | 10.6                                                                                          | 3                                                                              | 3                                                                              | 6144    | 11070          | None                                                                                            | Molecular function unknown                   | Plasma membrane             | Unclassified                    | Biological process unknown                                                      | TM;SP;NLS                     | Yes                      |
| DHRS7B      | 25979   | dehydrogenase/reductase SDR family member 7B                           | NP_056325.2       | 1          | 5                 | 5          | 12     | 0.86                                                     | 0.77                                                     | 7.51                                                                                   | 2.11                                                                                   | 15.9                                                                                          | 4                                                                                             | 6                                                                              | 6                                                                              | 13215   | 25979          | None                                                                                            | Oxidoreductase activity                      | Cytosol                     | Enzyme: Oxidoreductase          | Metabolism;Energy pathways                                                      | SP                            | No                       |
| GAA         | 2548    | lysosomal alpha-glucosidase preproprotein                              | NP_000143.2       | 1          | 8                 | 8          | 17     | 0.86                                                     | 0.76                                                     | 14.08                                                                                  | 13.74                                                                                  | 37.4                                                                                          | 32                                                                                            | 9                                                                              | 9                                                                              | 6006    | 2548           | glucosidase, alpha acid (Pompe disease, glycoconjugate storage disease type II)                 | Glucosidase activity                         | Lysosome                    | Enzyme: Glucosidase             | Metabolism;Energy pathways                                                      | Trefoil;LSP                   | Yes                      |
| SERPINB1    | 1992    | leukocyte elastase inhibitor                                           | NP_109591.1       | 3          | 18                | 19         | 64     | 0.86                                                     | 0.76                                                     | 5.45                                                                                   | 6.09                                                                                   | 27                                                                                            | 27.2                                                                                          | 32                                                                             | 33                                                                             | 555     | 1992           | serine (or cysteine) protease inhibitor,clade B (ovalbumin), member 1                           | Protease inhibitor activity                  | Cytoplasm                   | Protease inhibitor              | Protein metabolism                                                              | SERPIN                        | Yes                      |
| CASP3       | 836     | caspase-3 preproprotein                                                | NP_004337.2       | 1          | 2                 | 2          | 3      | 0.86                                                     | 0.75                                                     |                                                                                        |                                                                                        |                                                                                               |                                                                                               | 1                                                                              | 1                                                                              | 2799    | 836            | caspase 3, apoptosis-related cysteine protease                                                  | Cysteine-type peptidase activity             | Cytoplasm                   | Cysteine protease               | Apoptosis                                                                       | CASC                          | Yes                      |
| SLC9A3R1    | 9368    | Na(+)/H(+) exchange regulatory cofactor NHE-RF1                        | NP_004243.1       | 1          | 4                 | 4          | 8      | 0.86                                                     | 0.74                                                     | 1.68                                                                                   | 2.64                                                                                   | 2.9                                                                                           | 3.9                                                                                           | 4                                                                              | 4                                                                              | 5406    | 9368           | solute carrier family 9 (sodium/hydrogen exchanger), isoform 3 regulator 1                      | Receptor binding                             | Cytoplasm;Membrane fraction | Membrane bound ligand           | Cell communication;Signal transduction                                          | PDZ                           | Yes                      |
| PRKCDBP     | 112464  | protein kinase C delta-binding protein                                 | NP_659477.2       | 1          | 7                 | 7          | 19     | 0.86                                                     | 0.73                                                     | 4.99                                                                                   | 13.16                                                                                  | 13                                                                                            | 29.3                                                                                          | 9                                                                              | 9                                                                              | 17908   | 112464         | protein kinase C, delta binding protein                                                         | Molecular function unknown                   | Nucleus                     | Unclassified                    | Cell communication;Signal transduction                                          | -                             | No                       |
| RPS6KA1     | 6195    | ribosomal protein S6 kinase alpha-1 isoform b                          | NP_001006666.1    | 22         | 14                | 20         | 48     | 0.86                                                     | 0.72                                                     | 6.19                                                                                   | 12.12                                                                                  | 21.6                                                                                          | 35.8                                                                                          | 16                                                                             | 16                                                                             | 3402    | 6195           | ribosomal protein S6 kinase, 90kDa, polypeptide 1                                               | Protein serine/threonine kinase activity     | Cytosol                     | Serine/threonine kinase         | Cell communication;Signal transduction                                          | S_T_kinase                    | Yes                      |
| CCBL1       | 883     | kyurenine-oxoglutarate transaminase 1 isoform c                        | NP_001274319.1    | 3          | 1                 | 2          | 4      | 0.86                                                     | 0.72                                                     |                                                                                        |                                                                                        |                                                                                               |                                                                                               | 1                                                                              | 1                                                                              | 2769    | 883            | cysteine conjugate beta lyase; cytoplasmic;glutamine transaminase K, kyurenine aminotransferase | Lyase activity                               | Cytoplasm                   | Enzyme: Lyase                   | Metabolism;Energy pathways                                                      | -                             | Yes                      |
| ARPC5       | 10092   | actin-related protein 2/3 complex subunit 5 isoform 1                  | NP_005708.1       | 2          | 5                 | 5          | 19     | 0.86                                                     | 0.72                                                     | 8.65                                                                                   | 20.78                                                                                  | 25.1                                                                                          | 52.9                                                                                          | 11                                                                             | 11                                                                             | 11969   | 10092          | actin related protein 2/3 complex, subunit 5,16kDa                                              | Cytoskeletal protein binding                 | Cytoskeleton                | Cytoskeletal associated protein | Cell growth and/or maintenance                                                  | -                             | Yes                      |

Supplementary Table S1. List of quantified proteins in OKF6/TERT1-Smoke cells  
 Raingonalan *et al.*, 2017. Role of protein kinase N2 (PKN2) in cigarette smoke-mediated oncogenic transformation of oral cells

| Gene Symbol | Gene ID | Protein Description                                                         | Protein Accession | # Proteins | # Unique Peptides | # Peptides | # PSMs | OKF6/TERT1-Smoke/<br>OKF6/TERT1-Parental<br>(130/126) R1 | OKF6/TERT1-Smoke/<br>OKF6/TERT1-Parental<br>(128/127) R2 | Ratio Standard Errors [%]:<br>OKF6/TERT1-Smoke/<br>OKF6/TERT1-Parental<br>(130/126) R1 | Ratio Standard Errors [%]:<br>OKF6/TERT1-Smoke/<br>OKF6/TERT1-Parental<br>(128/127) R2 | Ratio Variabilities [%]:<br>F13: OKF6/TERT1-<br>Smoke/<br>OKF6/TERT1-Parental<br>(130/126) R1 | Ratio Variabilities [%]:<br>F13: OKF6/TERT1-<br>Smoke/<br>OKF6/TERT1-Parental<br>(128/127) R2 | Ratio Counts: F13:<br>OKF6/TERT1-Smoke/<br>OKF6/TERT1-Parental<br>(130/126) R1 | Ratio Counts: F13:<br>OKF6/TERT1-Smoke/<br>OKF6/TERT1-Parental<br>(128/127) R2 | HPRD ID | Entrez Gene ID | Gene Name                                                            | Molecular Function                              | Primary Localization              | Molecular Class                    | Biological Process                                                                           | Domains           | Plasma Proteome Database |
|-------------|---------|-----------------------------------------------------------------------------|-------------------|------------|-------------------|------------|--------|----------------------------------------------------------|----------------------------------------------------------|----------------------------------------------------------------------------------------|----------------------------------------------------------------------------------------|-----------------------------------------------------------------------------------------------|-----------------------------------------------------------------------------------------------|--------------------------------------------------------------------------------|--------------------------------------------------------------------------------|---------|----------------|----------------------------------------------------------------------|-------------------------------------------------|-----------------------------------|------------------------------------|----------------------------------------------------------------------------------------------|-------------------|--------------------------|
| TCOF1       | 6949    | treacle protein isoform d                                                   | NP_001128715.1    | 6          | 28                | 28         | 59     | 0.86                                                     | 0.72                                                     | 3.75                                                                                   | 5.23                                                                                   | 18.6                                                                                          | 22                                                                                            | 33                                                                             | 33                                                                             | 6026    | 6949           | Tracheal Collins-Franceschetti syndrome 1                            | Transcription regulator activity                | Nucleolus                         | Transcription regulatory protein   | Transcription;Cell migration;Ribosome biogenesis and assembly                                | LISH;NLS;NES      | Yes                      |
| FAM83F      | 113828  | protein FAM83F                                                              | NP_612444.2       | 1          | 2                 | 2          | 4      | 0.86                                                     | 0.7                                                      | 7.36                                                                                   | 35.92                                                                                  | 9                                                                                             | 36.6                                                                                          | 2                                                                              | 2                                                                              | 11228   | 113828         | None                                                                 | Molecular function unknown                      | -                                 | Unclassified                       | Biological process unknown                                                                   | -                 | No                       |
| MCM7        | 4176    | DNA replication licensing factor MCM7 isoform 1                             | NP_005907.3       | 2          | 16                | 16         | 35     | 0.86                                                     | 0.69                                                     | 7.28                                                                                   | 7.24                                                                                   | 26.9                                                                                          | 21.6                                                                                          | 18                                                                             | 18                                                                             | 1154    | 4176           | MCM7 minichromosome maintenance deficient 7 (S.cerevisiae)           | Helicase activity                               | Nucleus                           | Unclassified;DNA helicase          | Regulation of nucleobase, nucleoside, nucleotide and nucleic acid metabolism;DNA replication | MCM               | Yes                      |
| ITPR1       | 3708    | inositol 1,4,5-trisphosphate receptor type 1 isoform 3                      | NP_001161744.1    | 3          | 1                 | 7          | 13     | 0.86                                                     | 0.68                                                     |                                                                                        |                                                                                        |                                                                                               |                                                                                               | 1                                                                              | 1                                                                              | 925     | 3708           | inositol 1,4,5-trisphosphate receptor, type 1                        | Intracellular ligand-gated ion channel activity | Endoplasmic reticulum             | Intracellular ligand gated channel | Cell communication;Signal transduction                                                       | MIR;RYDR;CC;TM    | Yes                      |
| OSTF1       | 26578   | osteoclast-stimulating factor 1                                             | NP_036515.4       | 1          | 3                 | 3          | 10     | 0.86                                                     | 0.62                                                     | 14.47                                                                                  | 14.19                                                                                  | 28.2                                                                                          | 19.8                                                                                          | 5                                                                              | 5                                                                              | 17808   | 26578          | osteoclast stimulating factor 1                                      | Receptor signaling complex scaffold activity    | Nucleus                           | Adapter molecule                   | Cell communication;Signal transduction                                                       | SH3;ANK           | Yes                      |
| LIMS1       | 3987    | LIM and senescent cell antigen-like-containing domain protein 1 isoform e   | NP_001180413.1    | 5          | 4                 | 4          | 8      | 0.86                                                     | 0.6                                                      | 2.24                                                                                   | 34.33                                                                                  | 4.3                                                                                           | 48.5                                                                                          | 5                                                                              | 5                                                                              | 3978    | 3987           | LIM and senescent cell antigen-like domains 1                        | Receptor signaling complex scaffold activity    | Cytoplasm                         | Adapter molecule                   | Cell communication;Signal transduction                                                       | LIM               | Yes                      |
| PPAP2C      | 8612    | lipid phosphate phosphohydrolase 2 isoform 3                                | NP_808211.1       | 3          | 1                 | 1          | 2      | 0.86                                                     | 0.58                                                     |                                                                                        |                                                                                        |                                                                                               |                                                                                               | 1                                                                              | 1                                                                              | 6180    | 8612           | phosphatidic acid phosphatase type 2C                                | Hydrolase activity;Lipid phosphatase activity   | Integral to membrane              | Lipid phosphatase;Enzyme           | Cell communication;Signal transduction;Lipid metabolism                                      | TM;AcidPPe;SP     | No                       |
| COL5A2      | 1290    | collagen alpha-2(V) chain prepropeptide                                     | NP_000384.2       | 1          | 1                 | 1          | 5      | 0.86                                                     | 0.53                                                     | 5.35                                                                                   | 12.84                                                                                  | 6.5                                                                                           | 9.7                                                                                           | 2                                                                              | 2                                                                              | 366     | 1290           | collagen, type V, alpha 2                                            | Extracellular matrix structural constituent     | Extracellular                     | Extracellular matrix protein       | Cell growth and/or maintenance                                                               | VWC;COLL;COLFLSP  | Yes                      |
| PIIF        | 10105   | peptidylprolyl cis-trans isomerase F, mitochondrial precursor               | NP_005720.1       | 8          | 3                 | 4          | 8      | 0.86                                                     | 0.51                                                     |                                                                                        |                                                                                        |                                                                                               |                                                                                               | 1                                                                              | 1                                                                              | 6839    | 10105          | peptidylprolyl isomerase F (cyclophilin F)                           | Isomerase activity                              | Mitochondrion                     | Enzyme;Isomerase                   | Protein metabolism                                                                           | -                 | Yes                      |
| ASPSR1      | 79058   | tether containing UBX domain for GLUT4 isoform 2                            | NP_001238817.1    | 2          | 1                 | 1          | 2      | 0.86                                                     |                                                          |                                                                                        |                                                                                        |                                                                                               |                                                                                               | 1                                                                              | 1                                                                              | 6947    | 79058          | alveolar soft part sarcoma chromosome region,candidate 1             | Molecular function unknown                      | Cytoplasm                         | Unclassified                       | Biological process unknown                                                                   | CC;UBX            | Yes                      |
| RNF217      | 154214  | probable E3 ubiquitin-protein ligase RNF217 isoform a                       | NP_001273327.1    | 1          | 1                 | 1          | 1      | 0.85                                                     | 1.93                                                     |                                                                                        |                                                                                        |                                                                                               |                                                                                               | 1                                                                              | 1                                                                              | 17125   | 154214         | IBR domain containing 1                                              | Molecular function unknown                      | Integral to membrane              | Integral membrane protein          | Biological process unknown                                                                   | IBR;TM            | Yes                      |
| IMPDH1      | 3614    | inosine 5'-monophosphate dehydrogenase 1 isoform a                          | NP_000874.2       | 8          | 4                 | 5          | 12     | 0.85                                                     | 1.63                                                     | 5.54                                                                                   | 11.74                                                                                  | 9.5                                                                                           | 39.6                                                                                          | 4                                                                              | 4                                                                              | 8853    | 3614           | IMP (inosine monophosphate) dehydrogenase 1                          | Catalytic activity                              | Cytosol                           | Enzyme;Dehydrogenase               | Metabolism;Energy pathways                                                                   | CBS               | Yes                      |
| SDE2        | 163859  | protein SDE2 homolog                                                        | NP_689821.3       | 1          | 2                 | 2          | 2      | 0.85                                                     | 1.58                                                     |                                                                                        |                                                                                        |                                                                                               |                                                                                               | 1                                                                              | 1                                                                              |         |                |                                                                      |                                                 |                                   |                                    |                                                                                              |                   |                          |
| C19orf66    | 55337   | UPP0515 protein C19orf66 isoform 1                                          | NP_060851.2       | 2          | 2                 | 2          | 3      | 0.85                                                     | 1.51                                                     |                                                                                        |                                                                                        |                                                                                               |                                                                                               | 1                                                                              | 1                                                                              | 7747    | 55337          | None                                                                 | Molecular function unknown                      | -                                 | Unclassified                       | Biological process unknown                                                                   | CC                | No                       |
| SLC30A7     | 148867  | zinc transporter 7                                                          | NP_598003.2       | 1          | 1                 | 1          | 1      | 0.85                                                     | 1.42                                                     |                                                                                        |                                                                                        |                                                                                               |                                                                                               | 1                                                                              | 1                                                                              | 15369   | 148867         | solute carrier family 30 (zinc transporter),member 7                 | Auxiliary transport protein activity            | Golgi apparatus                   | Membrane transport protein         | Transport                                                                                    | TM                | Yes                      |
| SSR1        | 6745    | translocon-associated protein subunit alpha isoform 1 precursor             | NP_003135.2       | 2          | 4                 | 4          | 33     | 0.85                                                     | 1.33                                                     | 19.43                                                                                  | 12.18                                                                                  | 58.9                                                                                          | 57.8                                                                                          | 11                                                                             | 11                                                                             | 2924    | 6745           | signal sequence receptor, alpha(translocon-associated protein alpha) | Auxiliary transport protein activity            | Endoplasmic reticulum             | Membrane transport protein         | Transport                                                                                    | SP;TM             | Yes                      |
| GNB1        | 2782    | guanine nucleotide-binding protein G(i)(G(s)/G(t)) subunit beta-1 isoform 1 | NP_002065.1       | 4          | 6                 | 11         | 53     | 0.85                                                     | 1.32                                                     | 8.31                                                                                   | 6.28                                                                                   | 25                                                                                            | 29.4                                                                                          | 12                                                                             | 12                                                                             | 766     | 2782           | guanine nucleotide binding protein (G protein),beta polypeptide 1    | GTPase activity                                 | Plasma membrane                   | G protein                          | Cell communication;Signal transduction                                                       | CC;WD40           | Yes                      |
| VBP1        | 7411    | prefoldin subunit 3 isoform 2                                               | NP_001290472.1    | 4          | 5                 | 5          | 15     | 0.85                                                     | 1.31                                                     | 11.33                                                                                  | 6.1                                                                                    | 24.1                                                                                          | 19.8                                                                                          | 6                                                                              | 6                                                                              | 2135    | 7411           | von Hippel-Lindau binding protein 1                                  | Chaperone activity                              | Cytoplasm                         | Chaperone                          | Protein metabolism                                                                           | CC                | Yes                      |
| MRPL55      | 128308  | 39S ribosomal protein L55, mitochondrial isoform b                          | NP_852127.2       | 2          | 2                 | 2          | 3      | 0.85                                                     | 1.3                                                      | 9.81                                                                                   | 23.05                                                                                  | 11.8                                                                                          | 44.3                                                                                          | 2                                                                              | 2                                                                              | 14773   | 128308         | mitochondrial ribosomal protein L55                                  | Structural constituent of ribosome              | Mitochondrion                     | Ribosomal subunit                  | Protein metabolism                                                                           | CC                | No                       |
| SCYL3       | 57147   | protein-associating with the carboxyl-terminal domain of ezrin isoform 2    | NP_851607.2       | 2          | 2                 | 2          | 3      | 0.85                                                     | 1.23                                                     |                                                                                        |                                                                                        |                                                                                               |                                                                                               | 1                                                                              | 1                                                                              | 7459    | 57147          | SCY1-like 3 (S.cerevisiae)                                           | Molecular function unknown                      | Golgi apparatus                   | Unclassified                       | Biological process unknown                                                                   | S,T,Y_Kinase;HEAT | No                       |
| FAM188A     | 80013   | protein FAM188A                                                             | NP_079224.1       | 1          | 2                 | 2          | 3      | 0.85                                                     | 1.2                                                      |                                                                                        |                                                                                        |                                                                                               |                                                                                               | 1                                                                              | 1                                                                              | 10702   | 80013          | chromosome 10 open reading frame 97                                  | Molecular function unknown                      | Nucleus                           | Cell cycle control protein         | Apoptosis                                                                                    | CARD;EF           | No                       |
| COP9        | 10980   | COP9 signalosome complex subunit 6                                          | NP_006824.2       | 1          | 6                 | 6          | 16     | 0.85                                                     | 1.17                                                     | 10.48                                                                                  | 9.37                                                                                   | 27.2                                                                                          | 33.9                                                                                          | 9                                                                              | 9                                                                              | 16735   | 10980          | COP9 constitutive photomorphogenic homolog subunit 6 (Arabidopsis)   | Protein binding                                 | Cytoplasm                         | Cell cycle control protein         | Cell communication;Signal transduction                                                       | JAB               | No                       |
| METTL13     | 51603   | methyltransferase-like protein 13 isoform 1                                 | NP_057019.3       | 3          | 3                 | 3          | 4      | 0.85                                                     | 1.13                                                     | 0.34                                                                                   | 10.42                                                                                  | 0.5                                                                                           | 20.5                                                                                          | 3                                                                              | 3                                                                              | 13821   | 51603          | KIAA0859                                                             | Molecular function unknown                      | -                                 | Unclassified                       | Biological process unknown                                                                   | -                 | Yes                      |
| ASNA1       | 439     | ATPase ASNA1                                                                | NP_004308.2       | 1          | 8                 | 8          | 23     | 0.85                                                     | 1.13                                                     | 11.06                                                                                  | 8.97                                                                                   | 33.6                                                                                          | 36.2                                                                                          | 12                                                                             | 12                                                                             | 3555    | 439            | arsenic transporter, ATP-binding, homolog (bacterial)                | ATPase activity                                 | Cytoplasm                         | ATPase                             | Metabolism;Energy pathways                                                                   | -                 | Yes                      |
| MRPL3       | 11222   | 39S ribosomal protein L3, mitochondrial                                     | NP_009139.1       | 1          | 2                 | 2          | 4      | 0.85                                                     | 1.11                                                     | 5.18                                                                                   | 7.08                                                                                   | 6.3                                                                                           | 11.1                                                                                          | 2                                                                              | 2                                                                              | 6175    | 11222          | mitochondrial ribosomal protein L3                                   | Structural constituent of ribosome              | Nucleolus                         | Ribosomal subunit                  | Protein metabolism                                                                           | -                 | Yes                      |
| MAT2B       | 27430   | methionine adenosyltransferase 2 subunit beta isoform 1                     | NP_037415.1       | 2          | 9                 | 9          | 20     | 0.85                                                     | 1.11                                                     | 7.17                                                                                   | 8.22                                                                                   | 21.2                                                                                          | 32.4                                                                                          | 12                                                                             | 12                                                                             | 5701    | 27430          | methionine adenosyltransferase 2, beta                               | Catalytic activity                              | Cytoplasm                         | Enzyme;Adenosyltransferase         | Metabolism                                                                                   | -                 | No                       |
| NUMB        | 8650    | protein numb homolog isoform 1                                              | NP_001005743.1    | 4          | 2                 | 4          | 6      | 0.85                                                     | 1.08                                                     | 0.28                                                                                   | 5.41                                                                                   | 0.3                                                                                           | 8.2                                                                                           | 2                                                                              | 2                                                                              | 4767    | 8650           | numb homolog (Drosophila)                                            | Molecular function unknown                      | Plasma membrane;Nucleus;Cytoplasm | Unclassified                       | Development                                                                                  | PTB               | Yes                      |
| WDR60       | 55112   | WD repeat-containing protein 60                                             | NP_060521.4       | 1          | 1                 | 1          | 1      | 0.85                                                     | 1.07                                                     |                                                                                        |                                                                                        |                                                                                               |                                                                                               | 1                                                                              | 1                                                                              | 8545    | 55112          | WD repeat domain 60                                                  | Molecular function unknown                      | -                                 | Unclassified                       | Biological process unknown                                                                   | CC;WD40           | No                       |

Supplementary Table S1. List of quantified proteins in OKF6/TERT1-Smoke cells  
Raignanalan *et al.*, 2017. Role of protein kinase N2 (PKN2) in cigarette smoke-mediated oncogenic transformation of oral cells

| Gene Symbol | Gene ID | Protein Description                                                                      | Protein Accession | # Proteins | # Unique Peptides | # Peptides | # PSMs | OKF6/TERT1-Smoke/<br>OKF6/TERT1-Parental<br>(130/126) R1 | OKF6/TERT1-Smoke/<br>OKF6/TERT1-Parental<br>(128/127) R2 | Ratio Standard Errors [%]:<br>OKF6/TERT1-Smoke/<br>OKF6/TERT1-Parental<br>(130/126) R1 | Ratio Standard Errors [%]:<br>OKF6/TERT1-Smoke/<br>OKF6/TERT1-Parental<br>(128/127) R2 | Ratio Variabilities [%]:<br>F13: OKF6/TERT1-Smoke/<br>OKF6/TERT1-Parental<br>(130/126) R1 | Ratio Variabilities [%]:<br>F13: OKF6/TERT1-Smoke/<br>OKF6/TERT1-Parental<br>(128/127) R2 | Ratio Counts: F13:<br>OKF6/TERT1-Smoke/<br>OKF6/TERT1-Parental<br>(130/126) R1 | Ratio Counts: F13:<br>OKF6/TERT1-Smoke/<br>OKF6/TERT1-Parental<br>(128/127) R2 | HPRD ID | Entrez Gene Id | Gene Name                                                                              | Molecular Function                           | Primary Localization              | Molecular Class                 | Biological Process                                    | Domains                  | Plasma Proteome Database |  |
|-------------|---------|------------------------------------------------------------------------------------------|-------------------|------------|-------------------|------------|--------|----------------------------------------------------------|----------------------------------------------------------|----------------------------------------------------------------------------------------|----------------------------------------------------------------------------------------|-------------------------------------------------------------------------------------------|-------------------------------------------------------------------------------------------|--------------------------------------------------------------------------------|--------------------------------------------------------------------------------|---------|----------------|----------------------------------------------------------------------------------------|----------------------------------------------|-----------------------------------|---------------------------------|-------------------------------------------------------|--------------------------|--------------------------|--|
| DENN4C      | 55667   | DENN domain-containing protein 4C                                                        | NP_060395.5       | 1          | 2                 | 2          | 3      | 0.85                                                     | 1.06                                                     | 37.56                                                                                  | 8                                                                                      | 47.7                                                                                      | 12                                                                                        | 2                                                                              | 2                                                                              | 12927   | 55667          | chromosome 9 open reading frame 55                                                     | Molecular function unknown                   | Nucleus                           | Unclassified                    | Biological process unknown                            | -                        | Yes                      |  |
| SCLY        | 51540   | selenocysteine lyase                                                                     | NP_057594.4       | 1          | 1                 | 1          | 2      | 0.85                                                     | 1.05                                                     |                                                                                        |                                                                                        |                                                                                           |                                                                                           | 1                                                                              | 1                                                                              | 15303   | 51540          | selenocysteine lyase                                                                   | Lyase activity                               | Cytoplasm                         | Enzyme: Lyase                   | Metabolism;Energy pathways                            | -                        | No                       |  |
| CDK6        | 1021    | cyclin-dependent kinase 6                                                                | NP_001250.1       | 46         | 7                 | 8          | 26     | 0.85                                                     | 1.02                                                     | 3.83                                                                                   | 17.37                                                                                  | 8                                                                                         | 45.6                                                                                      | 6                                                                              | 6                                                                              | 4533    | 1021           | cyclin-dependent kinase 6                                                              | Protein binding                              | Nucleus                           | Cell cycle control protein      | Cell communication;Signal transduction                | S_T_Kinase               | Yes                      |  |
| NCDN        | 23154   | neurochondrin isoform 1                                                                  | NP_055099.1       | 2          | 7                 | 7          | 10     | 0.85                                                     | 1.02                                                     | 5.85                                                                                   | 7.01                                                                                   | 12.2                                                                                      | 17.7                                                                                      | 6                                                                              | 6                                                                              | 10530   | 23154          | neurochondrin                                                                          | Molecular function unknown                   | Cytoplasm                         | Unclassified                    | Biological process unknown                            | RGD                      | Yes                      |  |
| PKMTY1      | 9088    | membrane-associated tyrosine- and threonine-specific cdc2-inhibitory kinase isoform 1    | NP_004194.3       | 3          | 1                 | 1          | 2      | 0.85                                                     | 1.01                                                     |                                                                                        |                                                                                        |                                                                                           |                                                                                           | 1                                                                              | 1                                                                              | 3920    | 9088           | protein kinase, membrane associated/tyrosine/threonine 1                               | Protein threonine/tyrosine kinase activity   | Endoplasmic reticulum             | Dual specificity kinase         | Negative regulation of enzyme activity                | S_T_Y_Kinase             | Yes                      |  |
| HSD17B10    | 3028    | 3-hydroxyacyl-CoA dehydrogenase type-2 isoform 1                                         | NP_004484.1       | 2          | 9                 | 9          | 34     | 0.85                                                     | 1.01                                                     | 2.88                                                                                   | 7.93                                                                                   | 10.2                                                                                      | 33.8                                                                                      | 17                                                                             | 17                                                                             | 2223    | 3028           | 3-hydroxyacyl-Coenzyme A dehydrogenase, type II                                        | Catalytic activity                           | Mitochondrion                     | Enzyme: Dehydrogenase           | Metabolism;Energy pathways                            | KRINGLE                  | Yes                      |  |
| NDUFA12     | 55967   | NADH dehydrogenase [ubiquinone] 1 alpha subcomplex subunit 12 isoform a                  | NP_061326.1       | 1          | 2                 | 2          | 5      | 0.85                                                     | 1                                                        | 2.3                                                                                    | 0.7                                                                                    | 3.4                                                                                       | 1.2                                                                                       | 3                                                                              | 3                                                                              | 16781   | 55967          | None                                                                                   | Oxidoreductase activity                      | Mitochondrion                     | Enzyme: Oxidoreductase          | Metabolism;Energy pathways                            | -                        | Yes                      |  |
| AP3S1       | 1176    | AP-3 complex subunit sigma-1                                                             | NP_001275.1       | 1          | 3                 | 3          | 9      | 0.85                                                     | 0.99                                                     | 10.62                                                                                  | 3.79                                                                                   | 20.4                                                                                      | 8.4                                                                                       | 5                                                                              | 5                                                                              | 3298    | 1176           | adaptor-related protein complex 3 sigma 1 subunit                                      | Receptor signaling complex scaffold activity | Cytoplasm                         | Adapter molecule                | Cell communication;Signal transduction                | -                        | Yes                      |  |
| MALSU1      | 115416  | mitochondrial assembly of ribosomal large subunit protein 1                              | NP_612455.1       | 1          | 2                 | 2          | 2      | 0.85                                                     | 0.99                                                     | 21.13                                                                                  | 13.42                                                                                  | 25.8                                                                                      | 18.9                                                                                      | 2                                                                              | 2                                                                              |         |                |                                                                                        |                                              |                                   |                                 |                                                       |                          |                          |  |
| MRPS22      | 56945   | 28S ribosomal protein S22, mitochondrial                                                 | NP_064576.1       | 1          | 7                 | 7          | 12     | 0.85                                                     | 0.98                                                     | 14.67                                                                                  | 2.43                                                                                   | 34                                                                                        | 6.3                                                                                       | 7                                                                              | 7                                                                              | 10430   | 56945          | mitochondrial ribosomal protein S22                                                    | Structural constituent of ribosome           | Mitochondrion                     | Ribosomal subunit               | Protein metabolism                                    | SP                       | No                       |  |
| TOLLIP      | 54472   | toll-interacting protein                                                                 | NP_061882.2       | 1          | 3                 | 3          | 5      | 0.85                                                     | 0.98                                                     | 22.32                                                                                  | 14.6                                                                                   | 27.5                                                                                      | 20.4                                                                                      | 2                                                                              | 2                                                                              | 5887    | 54472          | toll interacting protein                                                               | Receptor signaling complex scaffold activity | Cytoplasm                         | Adapter molecule                | Cell communication;Signal transduction                | C2,CUE                   | Yes                      |  |
| SLC25A19    | 60386   | mitochondrial thiamine pyrophosphate carrier                                             | NP_068380.3       | 1          | 2                 | 2          | 4      | 0.85                                                     | 0.97                                                     | 17.83                                                                                  | 10.84                                                                                  | 21.6                                                                                      | 14.9                                                                                      | 2                                                                              | 2                                                                              | 8405    | 60386          | solute carrier family 25 (mitochondrial/lysosomal/vesicular carriers), member 19       | Auxiliary transport protein activity         | Mitochondrion                     | Membrane transport protein      | Transport                                             | TM                       | Yes                      |  |
| PRDX6       | 9588    | peroxiredoxin-6                                                                          | NP_004896.1       | 1          | 20                | 20         | 116    | 0.85                                                     | 0.96                                                     | 6.13                                                                                   | 7.88                                                                                   | 42.3                                                                                      | 63.2                                                                                      | 60                                                                             | 59                                                                             | 3817    | 9588           | peroxiredoxin 6                                                                        | Peroxidase activity                          | Lysosome                          | Enzyme: Peroxidase              | Metabolism;Energy pathways                            | -                        | Yes                      |  |
| BSG         | 682     | basigin isoform 1 precursor                                                              | NP_001719.2       | 4          | 7                 | 7          | 30     | 0.85                                                     | 0.95                                                     | 7.91                                                                                   | 4.37                                                                                   | 28.3                                                                                      | 17.2                                                                                      | 17                                                                             | 17                                                                             | 176     | 682            | basigin (OK blood group)                                                               | Receptor activity                            | Plasma membrane;Nucleus;Cytoplasm | Cell surface receptor           | Cell communication;Signal transduction                | IG,TMLSP                 | Yes                      |  |
| PRDX2       | 7001    | peroxiredoxin-2                                                                          | NP_005800.3       | 1          | 8                 | 9          | 35     | 0.85                                                     | 0.93                                                     | 6.22                                                                                   | 9.68                                                                                   | 21.5                                                                                      | 37                                                                                        | 16                                                                             | 16                                                                             | 2763    | 7001           | peroxiredoxin 2                                                                        | Peroxidase activity                          | Cytoplasm                         | Enzyme: Peroxidase              | Metabolism;Energy pathways                            | -                        | Yes                      |  |
| UFM1        | 51569   | ubiquitin-fold modifier 1 isoform 1 precursor                                            | NP_057701.1       | 2          | 1                 | 1          | 8      | 0.85                                                     | 0.92                                                     | 2.31                                                                                   | 3.18                                                                                   | 3.9                                                                                       | 5.8                                                                                       | 4                                                                              | 4                                                                              | 15644   | 51569          | ubiquitin-fold modifier 1                                                              | Molecular function unknown                   | -                                 | Unclassified                    | Biological process unknown                            | -                        | Yes                      |  |
| TVP23C      | 201158  | Golgi apparatus membrane protein TVP23 homolog C isoform 1                               | NP_660344.2       | 4          | 1                 | 1          | 2      | 0.85                                                     | 0.91                                                     |                                                                                        |                                                                                        |                                                                                           |                                                                                           | 1                                                                              | 1                                                                              |         |                |                                                                                        |                                              |                                   |                                 |                                                       |                          |                          |  |
| NDUFS2      | 4720    | NADH dehydrogenase [ubiquinone] iron-sulfur protein 2, mitochondrial isoform 1 precursor | NP_004541.1       | 2          | 10                | 10         | 28     | 0.85                                                     | 0.9                                                      | 12.55                                                                                  | 6.75                                                                                   | 41.5                                                                                      | 23                                                                                        | 14                                                                             | 14                                                                             | 4285    | 4720           | NADH dehydrogenase (ubiquinone) Fe-S protein2, 49kDa (NADH-coenzyme Q reductase)       | Oxidoreductase activity                      | Mitochondrion                     | Enzyme: Oxidoreductase          | Metabolism;Energy pathways                            | SP                       | Yes                      |  |
| CISD3       | 284106  | CDGSH iron-sulfur domain-containing protein 3, mitochondrial precursor                   | NP_001129970.1    | 1          | 1                 | 1          | 1      | 0.85                                                     | 0.89                                                     |                                                                                        |                                                                                        |                                                                                           |                                                                                           | 1                                                                              | 1                                                                              | 19534   | 284106         | CDGSH iron sulfur domain 3                                                             | Metal ion binding                            | -                                 | Unclassified                    | Biological process unknown                            | -                        | No                       |  |
| TUBGCP2     | 10844   | gamma-tubulin complex component 2 isoform 1                                              | NP_001243546.1    | 3          | 7                 | 7          | 13     | 0.85                                                     | 0.89                                                     | 7.2                                                                                    | 13.19                                                                                  | 16.3                                                                                      | 31.9                                                                                      | 7                                                                              | 7                                                                              | 18245   | 10844          | tubulin, gamma complex associated protein 2                                            | Cytoskeletal protein binding                 | Centrosome                        | Cytoskeletal associated protein | Cell growth and/or maintenance                        | SP                       | Yes                      |  |
| NDUFV2      | 4729    | NADH dehydrogenase [ubiquinone] flavoprotein 2, mitochondrial precursor                  | NP_066552.2       | 1          | 4                 | 4          | 14     | 0.85                                                     | 0.89                                                     | 20.9                                                                                   | 13.98                                                                                  | 49.6                                                                                      | 33.8                                                                                      | 7                                                                              | 7                                                                              | 2757    | 4729           | NADH dehydrogenase (ubiquinone) flavoprotein2, 24kDa                                   | Oxidoreductase activity                      | Mitochondrion                     | Enzyme: Oxidoreductase          | Metabolism;Energy pathways                            | -                        | Yes                      |  |
| REEP3       | 221035  | receptor expression-enhancing protein 3                                                  | NP_001001330.1    | 1          | 2                 | 2          | 3      | 0.85                                                     | 0.88                                                     | 19.2                                                                                   | 5.57                                                                                   | 23.5                                                                                      | 6.9                                                                                       | 2                                                                              | 2                                                                              | 16582   | 221035         | chromosome 10 open reading frame 74                                                    | Molecular function unknown                   | -                                 | Unclassified                    | Biological process unknown                            | -                        | No                       |  |
| PLXNB2      | 23654   | plexin-B2 precursor                                                                      | NP_036533.2       | 1          | 18                | 18         | 33     | 0.85                                                     | 0.87                                                     | 3.28                                                                                   | 4.86                                                                                   | 11.6                                                                                      | 17.5                                                                                      | 17                                                                             | 17                                                                             | 5050    | 23654          | plexin B2                                                                              | Receptor activity                            | Plasma membrane                   | Cell surface receptor           | Cell communication;Signal transduction                | -                        | Yes                      |  |
| NPTN        | 27020   | neuroligin isoform b precursor                                                           | NP_036560.1       | 4          | 7                 | 7          | 14     | 0.85                                                     | 0.86                                                     | 5.9                                                                                    | 10.42                                                                                  | 14.3                                                                                      | 25.7                                                                                      | 8                                                                              | 8                                                                              | 18033   | 27020          | stromal cell derived factor receptor 1                                                 | Antigen binding                              | Plasma membrane                   | Immunoglobulin                  | Immune response                                       | SP,IGC2;Ig_LIKE;TM       | No                       |  |
| EXOC2       | 55770   | exocyst complex component 2                                                              | NP_060773.3       | 1          | 7                 | 7          | 13     | 0.85                                                     | 0.86                                                     | 11.09                                                                                  | 3.97                                                                                   | 27.1                                                                                      | 9.7                                                                                       | 8                                                                              | 8                                                                              | 11544   | 55770          | SECS-like 1 (S. cerevisiae)                                                            | Auxiliary transport protein activity         | Plasma membrane                   | Membrane transport protein      | Transport                                             | IPT                      | Yes                      |  |
| MINK1       | 50488   | misshapen-like kinase 1 isoform 3                                                        | NP_722549.2       | 8          | 7                 | 11         | 21     | 0.85                                                     | 0.86                                                     | 5.33                                                                                   | 4.84                                                                                   | 12.9                                                                                      | 11.8                                                                                      | 8                                                                              | 8                                                                              | 11366   | 50488          | misshapen-like kinase 1 (zebrafish)                                                    | Protein serine/threonine kinase activity     | Golgi apparatus;Nucleus;Cytoplasm | Serine/threonine kinase         | Signal transduction                                   | S_T_Kinase;CNI;CC        | Yes                      |  |
| AARS2       | 57505   | alanine-tRNA ligase, mitochondrial                                                       | NP_065796.1       | 1          | 10                | 10         | 23     | 0.85                                                     | 0.85                                                     | 7.4                                                                                    | 7.47                                                                                   | 20.2                                                                                      | 21.4                                                                                      | 10                                                                             | 11                                                                             | 12397   | 57505          | alanyl-tRNA synthetase like                                                            | Molecular function unknown                   | Mitochondrion                     | Unclassified;Enzyme: Synthase   | Metabolism;Energy pathways;Biological process unknown | -                        | Yes                      |  |
| UTRN        | 7402    | utrophin                                                                                 | NP_009055.2       | 1          | 6                 | 6          | 11     | 0.85                                                     | 0.85                                                     | 4.71                                                                                   | 17.57                                                                                  | 9                                                                                         | 34.6                                                                                      | 5                                                                              | 5                                                                              | 547     | 7402           | utrophin (homologous to dystrophin) carbohydrate-phosphate synthetase 1, mitochondrial | Cytoskeletal anchoring activity              | Cytoplasm                         | Anchor protein                  | Cell growth and/or maintenance                        | CH,CC,WW,ZnF,ZZ,SPECTRIN | Yes                      |  |
| CPS1        | 1373    | carbamoyl-phosphate synthase [ammonia], mitochondrial isoform a precursor                | NP_001116105.1    | 3          | 7                 | 7          | 18     | 0.85                                                     | 0.85                                                     | 2.88                                                                                   | 13.64                                                                                  | 5.5                                                                                       | 26.4                                                                                      | 5                                                                              | 5                                                                              | 1995    | 1373           | None                                                                                   | Ligase activity                              | Mitochondrion                     | Enzyme: Ligase                  | Metabolism;Energy pathways                            | -                        | Yes                      |  |

Supplementary Table S1. List of quantified proteins in OKF6/TERT1-Smoke cells  
 Raingonalan *et al.*, 2017. Role of protein kinase N2 (PKN2) in cigarette smoke-mediated oncogenic transformation of oral cells

| Gene Symbol | Gene ID | Protein Description                                                            | Protein Accession | # Proteins | # Unique Peptides | # Peptides | # PSMs | OKF6/TERT1-Smoke/<br>OKF6/TERT1-Parental<br>(130/126) R1 | OKF6/TERT1-Smoke/<br>OKF6/TERT1-Parental<br>(128/127) R2 | Ratio Standard Errors [%]:<br>OKF6/TERT1-Smoke/<br>OKF6/TERT1-Parental<br>(130/126) R1 | Ratio Standard Errors [%]:<br>OKF6/TERT1-Smoke/<br>OKF6/TERT1-Parental<br>(128/127) R2 | Ratio Variabilities [%]:<br>F13: OKF6/TERT1-<br>Smoke/<br>OKF6/TERT1-Parental<br>(130/126) R1 | Ratio Variabilities [%]:<br>F13: OKF6/TERT1-<br>Smoke/<br>OKF6/TERT1-Parental<br>(128/127) R2 | Ratio Counts: F13:<br>OKF6/TERT1-Smoke/<br>OKF6/TERT1-Parental<br>(130/126) R1 | Ratio Counts: F13:<br>OKF6/TERT1-Smoke/<br>OKF6/TERT1-Parental<br>(128/127) R2 | HPRD ID | Entrez Gene ID | Gene Name                                                                                                                           | Molecular Function                                                        | Primary Localization  | Molecular Class                                        | Biological Process                                                                                                  | Domains              | Plasma Proteome Database |
|-------------|---------|--------------------------------------------------------------------------------|-------------------|------------|-------------------|------------|--------|----------------------------------------------------------|----------------------------------------------------------|----------------------------------------------------------------------------------------|----------------------------------------------------------------------------------------|-----------------------------------------------------------------------------------------------|-----------------------------------------------------------------------------------------------|--------------------------------------------------------------------------------|--------------------------------------------------------------------------------|---------|----------------|-------------------------------------------------------------------------------------------------------------------------------------|---------------------------------------------------------------------------|-----------------------|--------------------------------------------------------|---------------------------------------------------------------------------------------------------------------------|----------------------|--------------------------|
| EFTUD1      | 79631   | elongation factor Tu GTP-binding domain-containing protein 1 isoform 1         | NP_078856.4       | 2          | 9                 | 9          | 40     | 0.85                                                     | 0.85                                                     | 7.6                                                                                    | 8.57                                                                                   | 26.2                                                                                          | 27.9                                                                                          | 16                                                                             | 14                                                                             | 7812    | 79631          | elongation factor Tu GTP binding domain-containing 1                                                                                | Translation regulator activity                                            | -                     | Translation regulatory protein                         | Regulation of nucleobase, nucleoside, nucleotide and nucleic acid metabolism                                        | GTP_EFTU:GTP_EFTU_D2 | No                       |
| CCND2       | 894     | G1/S-specific cyclin-D2                                                        | NP_001750.1       | 1          | 3                 | 3          | 6      | 0.85                                                     | 0.85                                                     | 9.23                                                                                   | 13.63                                                                                  | 15.9                                                                                          | 23.6                                                                                          | 4                                                                              | 4                                                                              | 451     | 894            | cyclin D2                                                                                                                           | Kinase binding                                                            | Cytoplasm             | Cell cycle control protein                             | Cell communication;Signal transduction                                                                              | CYCLIN_N;CYCLIN_C    | No                       |
| MACF1       | 23499   | microtubule-actin cross-linking factor 1                                       | NP_036222.3       | 1          | 52                | 54         | 94     | 0.85                                                     | 0.85                                                     | 3.55                                                                                   | 4.01                                                                                   | 21.7                                                                                          | 24.4                                                                                          | 50                                                                             | 50                                                                             | 9750    | 23499          | microtubule-actin crosslinking factor 1                                                                                             | Cytoskeletal protein binding                                              | Cytoplasm;Nucleus     | Cytoskeletal associated protein                        | Cell communication;Signal transduction                                                                              | PLECC;SPECTRIN;EFCH  | Yes                      |
| MGAT1       | 4245    | alpha-1,3-mannosyl-glycoprotein 2-beta-N-acetylglucosaminyltransferase         | NP_002397.2       | 1          | 4                 | 4          | 7      | 0.85                                                     | 0.84                                                     | 20.88                                                                                  | 16.58                                                                                  | 31.7                                                                                          | 24.5                                                                                          | 3                                                                              | 3                                                                              | 1189    | 4245           | mannosyl (alpha-1,3-)-glycoproteinbeta-1,2-N-acetylglucosaminyltransferase                                                          | Transferase activity                                                      | Golgi apparatus       | Enzyme: Glucosaminyltransferase                        | Metabolism;Energy pathways                                                                                          | SP;TM                | Yes                      |
| ZW10        | 9183    | centromere/kinetochore protein zw10 homolog                                    | NP_004715.1       | 1          | 9                 | 9          | 23     | 0.85                                                     | 0.83                                                     | 6.14                                                                                   | 3.77                                                                                   | 17.5                                                                                          | 10.5                                                                                          | 11                                                                             | 11                                                                             | 4902    | 9183           | ZW10 homolog, centromere/kinetochore protein(Drosophila)                                                                            | DNA binding                                                               | Cytoplasm             | Cell cycle control protein                             | Cell communication;Signal transduction                                                                              | CC                   | Yes                      |
| RPS6KA4     | 8986    | ribosomal protein S6 kinase alpha-4 isoform a                                  | NP_003933.1       | 3          | 4                 | 4          | 8      | 0.85                                                     | 0.81                                                     | 9.11                                                                                   | 17.14                                                                                  | 15.7                                                                                          | 28.4                                                                                          | 4                                                                              | 4                                                                              | 4677    | 8986           | ribosomal protein S6 kinase, 90kDa, polypeptide 4                                                                                   | Protein serine/threonine kinase activity;Transcription regulator activity | Nucleus               | Translation regulatory protein;Serine/threonine kinase | Cell communication;Signal transduction;Regulation of nucleobase, nucleoside, nucleotide and nucleic acid metabolism | S_T_kinase           | Yes                      |
| SPECC1      | 92521   | cytosein-B isoform 1                                                           | NP_001028725.1    | 5          | 2                 | 2          | 3      | 0.85                                                     | 0.81                                                     |                                                                                        |                                                                                        |                                                                                               |                                                                                               | 1                                                                              | 1                                                                              |         |                |                                                                                                                                     |                                                                           |                       |                                                        |                                                                                                                     |                      |                          |
| NDUFS3      | 4722    | NADH dehydrogenase [ubiquinone] iron-sulfur protein 3, mitochondrial precursor | NP_004542.1       | 1          | 11                | 11         | 31     | 0.85                                                     | 0.8                                                      | 3.74                                                                                   | 5.27                                                                                   | 13.2                                                                                          | 17.6                                                                                          | 17                                                                             | 17                                                                             | 10355   | 4722           | NADH dehydrogenase (ubiquinone) Fe-S protein3, 30kDa (NADH-coenzyme Q reductase)                                                    | Catalytic activity                                                        | Mitochondrion         | Enzyme: Dehydrogenase                                  | Metabolism;Energy pathways                                                                                          | SP                   | Yes                      |
| FRYL        | 285527  | protein fury homolog-like                                                      | NP_055845.1       | 1          | 9                 | 9          | 20     | 0.85                                                     | 0.79                                                     | 4.14                                                                                   | 4.43                                                                                   | 11.2                                                                                          | 11                                                                                            | 10                                                                             | 10                                                                             | 18995   | 285527         | None                                                                                                                                | Molecular function unknown                                                | -                     | Unclassified                                           | Biological process unknown                                                                                          | -                    | No                       |
| ZFP36L2     | 678     | zinc finger protein 36, C3H1 type-like 2                                       | NP_008818.3       | 1          | 3                 | 3          | 5      | 0.85                                                     | 0.78                                                     | 26.47                                                                                  | 7.49                                                                                   | 40.4                                                                                          | 10.2                                                                                          | 3                                                                              | 3                                                                              | 18319   | 678            | zinc finger protein 36, C3H type-like 2                                                                                             | Transcription factor activity                                             | Nucleus               | Transcription factor                                   | Regulation of nucleobase, nucleoside, nucleotide and nucleic acid metabolism                                        | ZnF_C3H1             | Yes                      |
| HLA-E       | 3133    | HLA class I histocompatibility antigen, alpha chain E precursor                | NP_005507.3       | 1          | 1                 | 2          | 13     | 0.85                                                     | 0.78                                                     | 10.29                                                                                  | 21.85                                                                                  | 12.4                                                                                          | 24.6                                                                                          | 2                                                                              | 2                                                                              | 877     | 3133           | major histocompatibility complex, class I, E                                                                                        | MHC class I receptor activity;MHC class II receptor activity              | Plasma membrane       | MHC complex protein                                    | Immune response                                                                                                     | SP;JG;TM             | Yes                      |
| IRF9        | 10379   | interferon regulatory factor 9                                                 | NP_006075.3       | 1          | 2                 | 2          | 2      | 0.85                                                     | 0.77                                                     |                                                                                        |                                                                                        |                                                                                               |                                                                                               | 1                                                                              | 1                                                                              | 960     | 10379          | interferon-stimulated transcription factor 3,gamma 48kDa                                                                            | Transcription factor activity                                             | Nucleus               | Transcription factor                                   | Regulation of nucleobase, nucleoside, nucleotide and nucleic acid metabolism                                        | IRF                  | Yes                      |
| HADHB       | 3032    | trifunctional enzyme subunit beta, mitochondrial isoform 1 precursor           | NP_000174.1       | 3          | 18                | 18         | 79     | 0.85                                                     | 0.77                                                     | 9.37                                                                                   | 5.32                                                                                   | 55.1                                                                                          | 27                                                                                            | 42                                                                             | 42                                                                             | 887     | 3032           | hydroxyacyl-Coenzyme A dehydrogenase/3-ketoacyl-Coenzyme A thiolase/oxo-l-Coenzyme A hydratase(trifunctional protein), beta subunit | Catalytic activity                                                        | Mitochondrion         | Enzyme: Dehydrogenase                                  | Metabolism;Energy pathways                                                                                          | -                    | Yes                      |
| PON2        | 5445    | serum paraoxonase/arylesterase 2 isoform 1                                     | NP_000296.2       | 2          | 3                 | 3          | 9      | 0.85                                                     | 0.77                                                     | 5.86                                                                                   | 7.25                                                                                   | 10                                                                                            | 11.2                                                                                          | 4                                                                              | 4                                                                              | 3903    | 5445           | paraoxonase 2                                                                                                                       | Hydrolase activity;Antioxidant activity                                   | Plasma membrane       | Enzyme: Esterase                                       | Metabolism;Energy pathways;Lipid metabolism                                                                         | SP                   | Yes                      |
| STIM1       | 6786    | stromal interaction molecule 1 isoform 2 precursor                             | NP_003147.2       | 3          | 7                 | 7          | 13     | 0.85                                                     | 0.77                                                     | 6.11                                                                                   | 15.2                                                                                   | 13.8                                                                                          | 31.8                                                                                          | 7                                                                              | 7                                                                              | 5803    | 6786           | stromal interaction molecule 1                                                                                                      | Cell adhesion molecule activity                                           | Plasma membrane       | Adhesion molecule                                      | Cell communication;Signal transduction                                                                              | SAM;TM;SP;CC         | Yes                      |
| SLK         | 9748    | STE20-like serine/threonine-protein kinase isoform 1                           | NP_055535.2       | 2          | 20                | 21         | 45     | 0.85                                                     | 0.76                                                     | 3.15                                                                                   | 4.99                                                                                   | 13.2                                                                                          | 18.8                                                                                          | 24                                                                             | 24                                                                             | 11585   | 9748           | STE20-like kinase (yeast)                                                                                                           | Protein serine/threonine kinase activity                                  | Cytoplasm             | Serine/threonine kinase                                | Cell communication;Signal transduction                                                                              | S_T_kinase;CC        | Yes                      |
| MKL2        | 57496   | MKL/myocardin-like protein 2 isoform 1                                         | NP_001295071.1    | 2          | 2                 | 3          | 4      | 0.85                                                     | 0.76                                                     |                                                                                        |                                                                                        |                                                                                               |                                                                                               | 1                                                                              | 1                                                                              | 17577   | 57496          | MKL/myocardin-like 2                                                                                                                | Transcription factor activity                                             | Nucleus               | Transcription factor                                   | Regulation of nucleobase, nucleoside, nucleotide and nucleic acid metabolism                                        | SAP;CC               | Yes                      |
| TNS1        | 7145    | tensin-1 isoform 1                                                             | NP_072174.3       | 3          | 1                 | 1          | 3      | 0.85                                                     | 0.75                                                     | 32.87                                                                                  | 19.77                                                                                  | 41.2                                                                                          | 21.2                                                                                          | 2                                                                              | 2                                                                              | 2512    | 7145           | tensin 1                                                                                                                            | Cell adhesion molecule activity                                           | Plasma membrane       | Adhesion molecule                                      | Cell communication;Signal transduction                                                                              | DSPC;SH2;PTB         | Yes                      |
| KDSR        | 2531    | 3-ketodihydroxyglutinsome reductase precursor                                  | NP_002026.1       | 1          | 5                 | 5          | 8      | 0.85                                                     | 0.75                                                     | 7.63                                                                                   | 18.32                                                                                  | 16                                                                                            | 34.9                                                                                          | 6                                                                              | 6                                                                              | 640     | 2531           | follicular lymphoma variant translocation 1                                                                                         | Oxidoreductase activity                                                   | Extracellular         | Secreted polypeptide                                   | Regulation of nucleobase, nucleoside, nucleotide and nucleic acid metabolism                                        | SP                   | Yes                      |
| WDR35       | 57539   | WD repeat-containing protein 35 isoform 1                                      | NP_001006658.1    | 2          | 1                 | 1          | 2      | 0.85                                                     | 0.75                                                     |                                                                                        |                                                                                        |                                                                                               |                                                                                               | 1                                                                              | 1                                                                              | 15667   | 57539          | WD repeat domain 35                                                                                                                 | Molecular function unknown                                                | -                     | Unclassified                                           | Biological process unknown                                                                                          | WD40                 | Yes                      |
| GGCX        | 2677    | vitamin K-dependent gamma-carboxylase isoform 1                                | NP_000812.2       | 2          | 3                 | 3          | 4      | 0.85                                                     | 0.74                                                     |                                                                                        |                                                                                        |                                                                                               |                                                                                               | 1                                                                              | 1                                                                              | 665     | 2677           | gamma-glutamyl carboxylase                                                                                                          | Ligase activity                                                           | Endoplasmic reticulum | Enzyme: Carboxylase                                    | Metabolism;Energy pathways                                                                                          | TM                   | Yes                      |

Supplementary Table S1. List of quantified proteins in OKF6/TERT1-Smoke cells  
 Raingonalan *et al.*, 2017. Role of protein kinase N2 (PKN2) in cigarette smoke-mediated oncogenic transformation of oral cells

| Gene Symbol | Gene ID | Protein Description                                                     | Protein Accession | # Proteins | # Unique Peptides | # Peptides | # PSMs | OKF6/TERT1-Smoke/<br>OKF6/TERT1-Parental<br>(130/126) R1 | OKF6/TERT1-Smoke/<br>OKF6/TERT1-Parental<br>(128/127) R2 | Ratio Standard Errors [%]:<br>OKF6/TERT1-Smoke/<br>OKF6/TERT1-Parental<br>(130/126) R1 | Ratio Standard Errors [%]:<br>OKF6/TERT1-Smoke/<br>OKF6/TERT1-Parental<br>(128/127) R2 | Ratio Variabilities [%]:<br>F13: OKF6/TERT1-<br>Smoke/<br>OKF6/TERT1-Parental<br>(130/126) R1 | Ratio Variabilities [%]:<br>F13: OKF6/TERT1-<br>Smoke/<br>OKF6/TERT1-Parental<br>(128/127) R2 | Ratio Counts: F13:<br>OKF6/TERT1-Smoke/<br>OKF6/TERT1-Parental<br>(130/126) R1 | Ratio Counts: F13:<br>OKF6/TERT1-Smoke/<br>OKF6/TERT1-Parental<br>(128/127) R2 | HPRD ID | Entrez Gene ID | Gene Name                                                                   | Molecular Function                                                           | Primary Localization      | Molecular Class                          | Biological Process                                                | Domains                | Plasma Proteome Database |
|-------------|---------|-------------------------------------------------------------------------|-------------------|------------|-------------------|------------|--------|----------------------------------------------------------|----------------------------------------------------------|----------------------------------------------------------------------------------------|----------------------------------------------------------------------------------------|-----------------------------------------------------------------------------------------------|-----------------------------------------------------------------------------------------------|--------------------------------------------------------------------------------|--------------------------------------------------------------------------------|---------|----------------|-----------------------------------------------------------------------------|------------------------------------------------------------------------------|---------------------------|------------------------------------------|-------------------------------------------------------------------|------------------------|--------------------------|
| MYO9B       | 4650    | unconventional myosin-IXb isoform 1                                     | NP_004136.2       | 2          | 5                 | 5          | 10     | 0.85                                                     | 0.74                                                     | 4.26                                                                                   | 8.49                                                                                   | 8.1                                                                                           | 14.1                                                                                          | 5                                                                              | 2                                                                              | 3677    | 4650           | myosin IXB                                                                  | Motor activity                                                               | Cytoplasm                 | Motor protein                            | Cell growth and/or maintenance                                    | RA;IQCI;RHOG;AP;CC     | Yes                      |
| LRRC16A     | 55604   | leucine-rich repeat-containing protein 16A isoform 1                    | NP_060110.4       | 2          | 3                 | 3          | 5      | 0.85                                                     | 0.73                                                     | 18.54                                                                                  | 9.06                                                                                   | 22.6                                                                                          | 9.4                                                                                           | 2                                                                              | 2                                                                              | 11285   | 55604          | leucine rich repeat containing 16                                           | Molecular function unknown                                                   | -                         | Unclassified                             | Biological process unknown                                        | LRR                    | No                       |
| ALDH3A2     | 224     | fatty aldehyde dehydrogenase isoform 1                                  | NP_001026976.1    | 6          | 14                | 15         | 42     | 0.85                                                     | 0.73                                                     | 9.22                                                                                   | 6.03                                                                                   | 35.1                                                                                          | 19.3                                                                                          | 19                                                                             | 19                                                                             | 7188    | 224            | aldehyde dehydrogenase 3 family, member A2                                  | Catalytic activity                                                           | Endoplasmic reticulum     | Enzyme: Dehydrogenase                    | Metabolism                                                        | TM                     | Yes                      |
| FOXK2       | 3607    | forkhead box protein K2                                                 | NP_004505.2       | 1          | 1                 | 1          | 2      | 0.85                                                     | 0.72                                                     |                                                                                        |                                                                                        |                                                                                               |                                                                                               | 1                                                                              | 1                                                                              | 982     | 3607           | forkhead box K2                                                             | Transcription factor activity;DNA binding                                    | Nucleus                   | Transcription factor;DNA binding protein | Regulation of nucleobase, nucleotide and nucleic acid metabolism  | FHA;FHLNLS             | Yes                      |
| AFAP1       | 60312   | actin filament-associated protein 1 isoform A                           | NP_001128119.1    | 2          | 1                 | 1          | 2      | 0.85                                                     | 0.71                                                     |                                                                                        |                                                                                        |                                                                                               |                                                                                               | 1                                                                              | 1                                                                              | 9747    | 60312          | None                                                                        | Receptor signaling complex scaffold activity;Cytoskeletal anchoring activity | Cytoplasm                 | Adapter molecule                         | Cell growth and/or maintenance                                    | PH;CC                  | No                       |
| ERLEC1      | 27248   | endoplasmic reticulum lectin 1 isoform 1 precursor                      | NP_056516.2       | 3          | 2                 | 2          | 4      | 0.85                                                     | 0.67                                                     | 43.1                                                                                   | 38.82                                                                                  | 55.5                                                                                          | 38.3                                                                                          | 2                                                                              | 2                                                                              | 10310   | 27248          | chromosome 2 open reading frame 30                                          | Molecular function unknown                                                   | -                         | Unclassified                             | Biological process unknown                                        | SP                     | No                       |
| PLEKHF1     | 79156   | pleckstrin homology domain-containing family F member 1                 | NP_077286.3       | 1          | 1                 | 2          | 5      | 0.85                                                     | 0.66                                                     |                                                                                        |                                                                                        |                                                                                               |                                                                                               | 1                                                                              | 1                                                                              | 15146   | 79156          | pleckstrin homology domain containing, family F (with FYVE domain) member 1 | Molecular function unknown                                                   | -                         | Unclassified                             | Biological process unknown                                        | SP;PH;FYVE             | No                       |
| ERGIC1      | 57222   | endoplasmic reticulum-Golgi intermediate compartment protein 1          | NP_001026881.1    | 1          | 6                 | 6          | 18     | 0.85                                                     | 0.66                                                     | 10.15                                                                                  | 17.51                                                                                  | 23                                                                                            | 31.5                                                                                          | 7                                                                              | 7                                                                              | 13836   | 57222          | None                                                                        | Transporter activity                                                         | Golgi apparatus           | Transport/cargo protein                  | Transport                                                         | TM                     | No                       |
| CD63        | 967     | CD63 antigen isoform A                                                  | NP_001771.1       | 3          | 1                 | 1          | 2      | 0.85                                                     | 0.58                                                     |                                                                                        |                                                                                        |                                                                                               |                                                                                               | 1                                                                              | 1                                                                              | 1121    | 967            | CD63 antigen (melanoma 1 antigen)                                           | Molecular function unknown                                                   | Lysosome                  | Integral membrane protein                | Cell communication;Signal transduction                            | TM                     | Yes                      |
| NME1-NME2   | 654364  | NME1-NME2 protein                                                       | NP_001018146.1    | 5          | 14                | 14         | 63     | 0.84                                                     | 1.49                                                     | 7.65                                                                                   | 6.06                                                                                   | 41.3                                                                                          | 61.3                                                                                          | 38                                                                             | 39                                                                             |         |                |                                                                             |                                                                              |                           |                                          |                                                                   |                        |                          |
| SMYD2       | 56950   | N-lysine methyltransferase SMYD2                                        | NP_064582.2       | 1          | 1                 | 1          | 2      | 0.84                                                     | 1.34                                                     |                                                                                        |                                                                                        |                                                                                               |                                                                                               | 1                                                                              | 1                                                                              | 15406   | 56950          | SET and MYND domain containing 2                                            | Molecular function unknown                                                   | Nucleus                   | Unclassified                             | Biological process unknown                                        | SET                    | Yes                      |
| ARF1        | 375     | ADP-ribosylation factor 1                                               | NP_001649.1       | 2          | 6                 | 10         | 81     | 0.84                                                     | 1.3                                                      | 10.55                                                                                  | 19.32                                                                                  | 40                                                                                            | 151.2                                                                                         | 19                                                                             | 19                                                                             | 54      | 375            | ADP-ribosylation factor 1                                                   | GTPase activity                                                              | Golgi apparatus           | GTPase                                   | Signal transduction;Endosome transport                            | ARF                    | No                       |
| Sep-66      | 23157   | septin-6 isoform B                                                      | NP_055944.2       | 4          | 1                 | 3          | 40     | 0.84                                                     | 1.26                                                     |                                                                                        |                                                                                        |                                                                                               |                                                                                               | 1                                                                              | 1                                                                              |         |                |                                                                             |                                                                              |                           |                                          |                                                                   |                        |                          |
| CSTB        | 1476    | cystatin-B                                                              | NP_000091.1       | 1          | 2                 | 2          | 3      | 0.84                                                     | 1.26                                                     | 16.9                                                                                   | 39.74                                                                                  | 20.4                                                                                          | 80.9                                                                                          | 2                                                                              | 2                                                                              | 3091    | 1476           | cystatin B (stefin B)                                                       | Protease inhibitor activity                                                  | Nucleus                   | Protease inhibitor                       | Protein metabolism                                                | CYSTATIN               | Yes                      |
| HNRNP3      | 3189    | heterogeneous nuclear ribonucleoprotein H3 isoform a                    | NP_036339.1       | 2          | 9                 | 9          | 28     | 0.84                                                     | 1.25                                                     | 5.88                                                                                   | 3.66                                                                                   | 18.6                                                                                          | 17.3                                                                                          | 14                                                                             | 14                                                                             | 3818    | 3189           | heterogeneous nuclear ribonucleoprotein H3(2H9)                             | Ribonucleoprotein                                                            | Nucleus                   | Ribonucleoprotein                        | Regulation of nucleobase, nucleotide and nucleic acid metabolism  | RRM                    | Yes                      |
| ENY2        | 56943   | transcription and snRNA export factor ENY2 isoform 1                    | NP_064574.1       | 2          | 1                 | 1          | 2      | 0.84                                                     | 1.25                                                     |                                                                                        |                                                                                        |                                                                                               |                                                                                               | 1                                                                              | 1                                                                              | 13121   | 56943          | enhancer of yellow 2 homolog (Drosophila)                                   | Transcription factor activity                                                | Nucleus                   | Transcription factor                     | Regulation of nucleobase, nucleotide and nucleic acid metabolism  | -                      | No                       |
| FAS         | 355     | tumor necrosis factor receptor superfamily member 6 isoform 1 precursor | NP_000034.1       | 2          | 4                 | 4          | 6      | 0.84                                                     | 1.23                                                     | 10.26                                                                                  | 10.62                                                                                  | 17.4                                                                                          | 26.6                                                                                          | 4                                                                              | 4                                                                              | 609     | 355            | Fas (TNF receptor superfamily, member 6)                                    | Receptor activity;Binding                                                    | Plasma membrane           | Cell surface receptor;Unclassified       | Cell communication;Signal transduction;Anti-apoptosis             | TM;TNFR;DEAT;HSP       | No                       |
| ADSL        | 158     | adenylosuccinate lyase isoform a                                        | NP_000017.1       | 2          | 7                 | 7          | 16     | 0.84                                                     | 1.15                                                     | 16.05                                                                                  | 4.91                                                                                   | 39.5                                                                                          | 16.1                                                                                          | 8                                                                              | 8                                                                              | 49      | 158            | adenylosuccinate lyase                                                      | Lyase activity                                                               | Cytoplasm                 | Enzyme: Lyase                            | Metabolism;Energy pathways                                        | CC                     | Yes                      |
| SLC30A6     | 55676   | zinc transporter 6 isoform 1                                            | NP_001180442.1    | 4          | 1                 | 1          | 2      | 0.84                                                     | 1.14                                                     |                                                                                        |                                                                                        |                                                                                               |                                                                                               | 1                                                                              | 1                                                                              | 15368   | 55676          | solute carrier family 30 (zinc transporter), member 6                       | Transporter activity                                                         | Golgi apparatus           | Transport/cargo protein                  | Transport                                                         | TM                     | No                       |
| MRPL45      | 84311   | 39S ribosomal protein L45, mitochondrial isoform 1                      | NP_115727.5       | 1          | 1                 | 1          | 3      | 0.84                                                     | 1.12                                                     | 3.67                                                                                   | 11.66                                                                                  | 5.3                                                                                           | 22.9                                                                                          | 3                                                                              | 3                                                                              | 14764   | 84311          | mitochondrial ribosomal protein L45                                         | Structural constituent of ribosome                                           | Mitochondrion             | Ribosomal subunit                        | Protein metabolism                                                | -                      | Yes                      |
| DGKZ        | 8525    | diacylglycerol kinase zeta isoform 4                                    | NP_001099010.1    | 7          | 3                 | 3          | 4      | 0.84                                                     | 1.12                                                     | 24.38                                                                                  | 3.5                                                                                    | 29.6                                                                                          | 5.5                                                                                           | 2                                                                              | 2                                                                              | 3260    | 8525           | diacylglycerol kinase, zeta 104kDa                                          | Catalytic activity                                                           | Nucleus                   | Enzyme: Phosphotransferase               | Cell communication;Signal transduction;Vesicle-mediated transport | C1;DAGKC;ANK;DAGKa;ANX | Yes                      |
| MOB2        | 81532   | MOB kinase activator 2 isoform 1                                        | NP_001165694.1    | 2          | 1                 | 1          | 2      | 0.84                                                     | 1.11                                                     |                                                                                        |                                                                                        |                                                                                               |                                                                                               | 1                                                                              | 1                                                                              |         |                |                                                                             |                                                                              |                           |                                          |                                                                   |                        |                          |
| TBC1D15     | 64786   | TBC1 domain family member 15 isoform 2                                  | NP_001139686.1    | 3          | 4                 | 4          | 6      | 0.84                                                     | 1.11                                                     | 18.38                                                                                  | 10.18                                                                                  | 22                                                                                            | 16                                                                                            | 2                                                                              | 2                                                                              | 15470   | 64786          | TBC1 domain family member 15                                                | GTPase activator activity                                                    | -                         | GTPase activating protein                | Cell communication;Signal transduction                            | TBC                    | No                       |
| CAB39       | 51719   | calcium-binding protein 39                                              | NP_057373.1       | 2          | 12                | 12         | 32     | 0.84                                                     | 1.11                                                     | 13.91                                                                                  | 14.08                                                                                  | 47.4                                                                                          | 66.5                                                                                          | 15                                                                             | 15                                                                             | 10091   | 51719          | calcium binding protein 39                                                  | Calcium ion binding                                                          | -                         | Calcium binding protein                  | Biological process unknown                                        | -                      | Yes                      |
| SCPEP1      | 59342   | retinoid-inducible serine carboxypeptidase precursor                    | NP_067639.1       | 1          | 4                 | 4          | 12     | 0.84                                                     | 1.1                                                      | 4.46                                                                                   | 13.35                                                                                  | 9.1                                                                                           | 37.2                                                                                          | 6                                                                              | 6                                                                              | 10194   | 59342          | serine carboxypeptidase 1                                                   | Carboxypeptidase activity                                                    | Cytoplasm                 | Carboxypeptidase                         | Protein metabolism                                                | SP                     | No                       |
| PRPSAP1     | 5635    | phosphoribosyl pyrophosphate synthase-associated protein 1              | NP_002757.2       | 1          | 7                 | 10         | 31     | 0.84                                                     | 1.07                                                     | 12.03                                                                                  | 9.83                                                                                   | 34.5                                                                                          | 36.1                                                                                          | 11                                                                             | 11                                                                             | 3151    | 5635           | phosphoribosyl pyrophosphate synthase-associated protein 1                  | Enzyme regulator activity                                                    | Cytoplasm                 | Regulatory/other subunit                 | Metabolism;Energy pathways                                        | -                      | Yes                      |
| APOBEC3F    | 200316  | DNA dC>dU-editing enzyme APOBEC-3F isoform a                            | NP_660341.2       | 3          | 1                 | 3          | 6      | 0.84                                                     | 1.07                                                     |                                                                                        |                                                                                        |                                                                                               |                                                                                               | 1                                                                              | 1                                                                              | 16415   | 200316         | apolipoprotein B mRNA editing enzyme, catalytic polypeptide-like 3F         | RNA binding                                                                  | -                         | RNA binding protein                      | RNA metabolism                                                    | -                      | Yes                      |
| ZYX         | 7791    | zyxin                                                                   | NP_003452.1       | 1          | 14                | 14         | 42     | 0.84                                                     | 1.04                                                     | 6.45                                                                                   | 6.41                                                                                   | 26.3                                                                                          | 32.9                                                                                          | 23                                                                             | 23                                                                             | 3592    | 7791           | zyxin                                                                       | Cell adhesion molecule activity                                              | Plasma membrane;Cytoplasm | Adhesion molecule                        | Signal transduction                                               | LIM                    | Yes                      |

Supplementary Table S1. List of quantified proteins in OKF6/TERT1-Smoke cells

Rajagopalan et al., 2017, Role of protein kinase N2 (PKN2) in cigarette smoke-mediated oncogenic transformation of oral cells

| Gene Symbol | Gene ID | Protein Description                                                                       | Protein Accession | # Proteins | # Unique Peptides | # Peptides | # PSMs | OKF6/TERT1-Smoke/<br>OKF6/TERT1-Parental<br>(130/126) R1 | OKF6/TERT1-Smoke/<br>OKF6/TERT1-Parental<br>(128/127) R2 | Ratio Standard Errors [%]:<br>OKF6/TERT1-Smoke/<br>OKF6/TERT1-Parental<br>(130/126) R1 | Ratio Standard Errors [%]:<br>OKF6/TERT1-Smoke/<br>OKF6/TERT1-Parental<br>(128/127) R2 | Ratio Variabilities [%]:<br>F13: OKF6/TERT1-<br>Smoke/<br>OKF6/TERT1-Parental<br>(130/126) R1 | Ratio Variabilities [%]:<br>F13: OKF6/TERT1-<br>Smoke/<br>OKF6/TERT1-Parental<br>(128/127) R2 | Ratio Counts: F13:<br>OKF6/TERT1-Smoke/<br>OKF6/TERT1-Parental<br>(130/126) R1 | Ratio Counts: F13:<br>OKF6/TERT1-Smoke/<br>OKF6/TERT1-Parental<br>(128/127) R2 | HFPRD ID | Entrez Gene Id | Gene Name                                                                                                                        | Molecular Function                            | Primary Localization | Molecular Class                                | Biological Process                                               | Domains              | Plasma Proteome Database |  |
|-------------|---------|-------------------------------------------------------------------------------------------|-------------------|------------|-------------------|------------|--------|----------------------------------------------------------|----------------------------------------------------------|----------------------------------------------------------------------------------------|----------------------------------------------------------------------------------------|-----------------------------------------------------------------------------------------------|-----------------------------------------------------------------------------------------------|--------------------------------------------------------------------------------|--------------------------------------------------------------------------------|----------|----------------|----------------------------------------------------------------------------------------------------------------------------------|-----------------------------------------------|----------------------|------------------------------------------------|------------------------------------------------------------------|----------------------|--------------------------|--|
| ATP5C1      | 509     | ATP synthase subunit gamma, mitochondrial isoform L (liver) precursor                     | NP_001001973.1    | 2          | 10                | 10         | 37     | 0.84                                                     | 1.04                                                     | 4.22                                                                                   | 7.33                                                                                   | 16.3                                                                                          | 36.1                                                                                          | 21                                                                             | 21                                                                             | 156      | 509            | ATP synthase, H-transferring, mitochondrial F1 complex, gamma polypeptide 1                                                      | Transporter activity                          | Mitochondrion        | Transport/cargo protein                        | Metabolism;Energy pathways                                       | -                    | Yes                      |  |
| AMIGO2      | 347902  | amphoterin-induced protein 2 precursor                                                    | NP_862830.1       | 1          | 1                 | 1          | 5      | 0.84                                                     | 1.03                                                     | 37.7                                                                                   | 10.42                                                                                  | 46.9                                                                                          | 15.3                                                                                          | 2                                                                              | 2                                                                              | 16483    | 347902         | None                                                                                                                             | Cell adhesion molecule activity               | Plasma membrane      | Adhesion molecule                              | Cell growth and/or maintenance                                   | SP;LRR;IG;TM         | No                       |  |
| GALK2       | 2585    | N-acetylgalactosamine kinase isoform 1                                                    | NP_002035.1       | 3          | 4                 | 4          | 9      | 0.84                                                     | 1.03                                                     | 3.86                                                                                   | 6.82                                                                                   | 8                                                                                             | 17.3                                                                                          | 6                                                                              | 6                                                                              | 657      | 2585           | galactokinase 2                                                                                                                  | Galactosyltransferase activity                | Cytoplasm            | Enzyme: Sugar phosphotransferase               | Metabolism;Energy pathways                                       | -                    | Yes                      |  |
| SHMT1       | 6470    | serine hydroxymethyltransferase, cytosolic isoform 1                                      | NP_004160.3       | 3          | 1                 | 2          | 21     | 0.84                                                     | 1.03                                                     |                                                                                        |                                                                                        |                                                                                               |                                                                                               | 1                                                                              | 1                                                                              | 1643     | 6470           | serine hydroxymethyltransferase 1 (soluble)                                                                                      | Methyltransferase activity;RNA binding        | Cytoplasm            | Enzyme: Methyltransferase; RNA binding protein | Metabolism;Energy pathways                                       | -                    | Yes                      |  |
| VWA8        | 23078   | von Willebrand factor A domain-containing protein 8 isoform a precursor                   | NP_055873.1       | 2          | 14                | 14         | 28     | 0.84                                                     | 1                                                        | 6.06                                                                                   | 4.86                                                                                   | 19.9                                                                                          | 18.9                                                                                          | 15                                                                             | 15                                                                             |          |                |                                                                                                                                  |                                               |                      |                                                |                                                                  |                      |                          |  |
| NCS1        | 23413   | neuronal calcium sensor 1 isoform 1                                                       | NP_055101.2       | 2          | 1                 | 1          | 2      | 0.84                                                     | 1                                                        |                                                                                        |                                                                                        |                                                                                               |                                                                                               | 1                                                                              | 1                                                                              | 4500     | 23413          | nequinin homolog (Drosophila)                                                                                                    | Calcium ion binding                           | Golgi apparatus      | Calcium binding protein                        | Cell communication;Signal transduction                           | EF                   | Yes                      |  |
| PPP2RSD     | 5528    | serine/threonine-protein phosphatase 2A 56 kDa regulatory subunit delta isoform isoform 1 | NP_006236.1       | 4          | 7                 | 10         | 19     | 0.84                                                     | 1                                                        | 19.67                                                                                  | 13.43                                                                                  | 52.5                                                                                          | 42.2                                                                                          | 9                                                                              | 9                                                                              | 9039     | 5528           | protein phosphatase 2, regulatory subunit B (B56), delta isoform                                                                 | Protein serine/threonine phosphatase activity | Nucleus;Cytoplasm    | Serine/threonine phosphatase                   | Cell communication;Signal transduction                           | -                    | Yes                      |  |
| GNS         | 2799    | N-acetylglucosamine-6-sulfatase precursor                                                 | NP_002067.1       | 1          | 3                 | 3          | 8      | 0.84                                                     | 0.99                                                     | 12.67                                                                                  | 3.73                                                                                   | 24.2                                                                                          | 8.3                                                                                           | 5                                                                              | 5                                                                              | 9637     | 2799           | glucosamine (N-acetyl)-6-sulfatase (Sanfilippo disease III)                                                                      | Catalytic activity                            | Lysosome             | Enzyme: Sulphatase                             | Metabolism;Energy pathways                                       | TM;SULF              | No                       |  |
| RANBP6      | 26953   | ran-binding protein 6 isoform 1                                                           | NP_036548.1       | 2          | 3                 | 5          | 24     | 0.84                                                     | 0.97                                                     |                                                                                        |                                                                                        |                                                                                               |                                                                                               | 1                                                                              | 1                                                                              | 17953    | 26953          | RAN binding protein 6                                                                                                            | Transporter activity                          | -                    | Transport/cargo protein                        | Transport                                                        | CC;HEAT              | Yes                      |  |
| ACAT2       | 39      | acetyl-CoA acetyltransferase, cytosolic isoform 1                                         | NP_005882.2       | 2          | 15                | 15         | 75     | 0.84                                                     | 0.97                                                     | 4.12                                                                                   | 6.13                                                                                   | 21.8                                                                                          | 39.1                                                                                          | 39                                                                             | 40                                                                             | 6        | 39             | acetyl-Coenzyme A acetyltransferase 2 (acetoacetyl-Coenzyme A thioesterase)                                                      | Acyltransferase activity                      | Cytoplasm            | Enzyme: Acyltransferase                        | Metabolism;Energy pathways                                       | -                    | Yes                      |  |
| CAPN2       | 824     | calpain-2 catalytic subunit isoform 1                                                     | NP_001739.2       | 2          | 30                | 30         | 145    | 0.84                                                     | 0.96                                                     | 3.22                                                                                   | 2.43                                                                                   | 23.1                                                                                          | 19.7                                                                                          | 71                                                                             | 71                                                                             | 254      | 824            | calpain 2, (mD) large subunit (Homo sapiens) Oth or Alias: HGNC:1479; CAPN2L; CAPN2; mCANP; Other Designations: Calpain 2, large | Cysteine-type peptidase activity              | Cytoplasm            | Cysteine protease                              | Protein metabolism                                               | CYSPC;CALPAIN_III;EF | Yes                      |  |
| FARS2       | 10667   | phenylalanine-tRNA ligase, mitochondrial precursor                                        | NP_006558.1       | 1          | 2                 | 2          | 3      | 0.84                                                     | 0.96                                                     | 0.95                                                                                   | 0.83                                                                                   | 1.1                                                                                           | 1.1                                                                                           | 2                                                                              | 2                                                                              | 9946     | 10667          | phenylalanine-tRNA synthetase 2 (mitochondrial)                                                                                  | Ligase activity                               | Mitochondrion        | Enzyme: Ligase                                 | Metabolism;Energy pathways                                       | -                    | Yes                      |  |
| GNPDA2      | 132789  | glucosamine-6-phosphate isomerase 2 isoform 1                                             | NP_612208.1       | 3          | 4                 | 7          | 16     | 0.84                                                     | 0.94                                                     | 8.89                                                                                   | 37.1                                                                                   | 13                                                                                            | 66.6                                                                                          | 3                                                                              | 3                                                                              | 13594    | 132789         | glucosamine-6-phosphate deaminase 2                                                                                              | Deaminase activity                            | -                    | Enzyme: Deaminase                              | Metabolism;Energy pathways                                       | CC                   | No                       |  |
| OXR1        | 55074   | oxidation resistance protein 1 isoform 3                                                  | NP_001185461.1    | 6          | 2                 | 2          | 2      | 0.84                                                     | 0.93                                                     |                                                                                        |                                                                                        |                                                                                               |                                                                                               | 1                                                                              | 1                                                                              | 16126    | 55074          | oxidation resistance 1                                                                                                           | Molecular function unknown                    | Mitochondrion        | Unclassified                                   | Biological process unknown                                       | -                    | Yes                      |  |
| CAP1        | 10487   | adenylyl cyclase-associated protein 1                                                     | NP_001099000.1    | 2          | 27                | 27         | 209    | 0.84                                                     | 0.91                                                     | 4.17                                                                                   | 4                                                                                      | 37.5                                                                                          | 38.3                                                                                          | 106                                                                            | 104                                                                            | 9869     | 10487          | CAP, adenylyl cyclase-associated protein 1 (yeast)                                                                               | Molecular function unknown                    | Cytoplasm            | Unclassified                                   | Cell growth and/or maintenance                                   | CARP                 | Yes                      |  |
| PRKAG1      | 5571    | 5'-AMP-activated protein kinase subunit gamma-1 isoform 3                                 | NP_001193638.1    | 7          | 6                 | 6          | 15     | 0.84                                                     | 0.91                                                     | 17.62                                                                                  | 6.96                                                                                   | 46.7                                                                                          | 19.2                                                                                          | 9                                                                              | 9                                                                              | 4118     | 5571           | protein kinase, AMP-activated, gamma 1 non-catalytic subunit                                                                     | Molecular function unknown                    | -                    | Regulatory/other subunit                       | Signal transduction                                              | CBS                  | Yes                      |  |
| LPP         | 4026    | lipoma-preferred partner isoform a                                                        | NP_005569.1       | 2          | 4                 | 4          | 11     | 0.84                                                     | 0.91                                                     | 21.45                                                                                  | 8.18                                                                                   | 37.5                                                                                          | 14.9                                                                                          | 4                                                                              | 4                                                                              | 2828     | 4026           | LIM domain containing preferred translocation partner in lipoma                                                                  | Molecular function unknown                    | Cytoplasm            | Unclassified                                   | Cell growth and/or maintenance                                   | CC;LIM;NLS           | Yes                      |  |
| PHGDH       | 26227   | D-3-phosphoglycerate dehydrogenase                                                        | NP_006614.2       | 1          | 17                | 17         | 62     | 0.84                                                     | 0.9                                                      | 4.83                                                                                   | 3.61                                                                                   | 22.5                                                                                          | 17.9                                                                                          | 30                                                                             | 30                                                                             | 6047     | 26227          | phosphoglycerate dehydrogenase                                                                                                   | Catalytic activity                            | Extracellular        | Enzyme: Dehydrogenase                          | Metabolism;Energy pathways                                       | 2HD                  | Yes                      |  |
| PHLDB1      | 23187   | pleckstrin homology-like domain family B member 1 isoform a                               | NP_001138230.1    | 2          | 12                | 12         | 20     | 0.84                                                     | 0.89                                                     | 4.96                                                                                   | 9.64                                                                                   | 14.5                                                                                          | 30.3                                                                                          | 12                                                                             | 12                                                                             | 15128    | 23187          | pleckstrin homology-like domain, family B, member 1                                                                              | Molecular function unknown                    | Nucleus;Cytoplasm    | Unclassified                                   | Biological process unknown                                       | FHA;CC;PH            | No                       |  |
| NIF3L1      | 60491   | NIF3-like protein 1 isoform 1                                                             | NP_001129511.1    | 3          | 7                 | 7          | 13     | 0.84                                                     | 0.89                                                     | 14.7                                                                                   | 15.55                                                                                  | 33.4                                                                                          | 37.7                                                                                          | 7                                                                              | 7                                                                              | 10424    | 60491          | NIF3 NGG1 interacting factor 3-like 1 (S.pombe)                                                                                  | Transcription regulator activity              | Nucleus              | Transcription regulatory protein               | Regulation of nucleoside, nucleotide and nucleic acid metabolism | -                    | Yes                      |  |
| PGLS        | 25796   | 6-phosphogluconolactonase                                                                 | NP_036220.1       | 1          | 7                 | 7          | 25     | 0.84                                                     | 0.89                                                     | 9.77                                                                                   | 9.97                                                                                   | 26.3                                                                                          | 31.3                                                                                          | 10                                                                             | 12                                                                             | 12001    | 25796          | 6-phosphogluconolactonase                                                                                                        | Hydrolase activity                            | -                    | Enzyme: Hydrolase                              | Metabolism;Energy pathways                                       | SP                   | Yes                      |  |
| NRM         | 11270   | nurim isoform 2                                                                           | NP_001257636.1    | 4          | 2                 | 2          | 3      | 0.84                                                     | 0.86                                                     | 23.35                                                                                  | 3.5                                                                                    | 28.1                                                                                          | 4.3                                                                                           | 2                                                                              | 2                                                                              | 10120    | 11270          | nurim (nuclear envelope membrane protein)                                                                                        | Molecular function unknown                    | Nucleus              | Unclassified                                   | Biological process unknown                                       | TM                   | No                       |  |
| STX12       | 23673   | syntaxin-12                                                                               | NP_803173.1       | 1          | 8                 | 8          | 22     | 0.84                                                     | 0.85                                                     | 13.83                                                                                  | 9.57                                                                                   | 40.1                                                                                          | 27.4                                                                                          | 11                                                                             | 11                                                                             | 6059     | 23673          | syntaxin 12                                                                                                                      | Auxiliary transport protein activity          | Endosome             | Membrane transport protein                     | Transport                                                        | SynN;TM;CC;S_NARE    | Yes                      |  |
| EZR         | 7430    | ezrin                                                                                     | NP_003370.2       | 1          | 28                | 39         | 164    | 0.84                                                     | 0.85                                                     | 4.53                                                                                   | 7.29                                                                                   | 25.9                                                                                          | 43.3                                                                                          | 45                                                                             | 45                                                                             | 475      | 7430           | villin 2 (ezrin)                                                                                                                 | Cytoskeletal anchoring activity               | Cytoplasm            | Anchor protein                                 | Cell growth and/or maintenance                                   | B41;ERM;CC           | Yes                      |  |
| TOM1L2      | 146691  | TOM1-like protein 2 isoform 3                                                             | NP_001076437.1    | 4          | 1                 | 1          | 2      | 0.84                                                     | 0.84                                                     |                                                                                        |                                                                                        |                                                                                               |                                                                                               | 1                                                                              | 1                                                                              | 18213    | 146691         | target of myb1-like 2 (chicken)                                                                                                  | Transporter activity                          | -                    | Transport/cargo protein                        | Transport                                                        | VHS;CC               | No                       |  |
| NDEL1       | 81565   | nuclear distribution protein nadeE-like 1 isoform B                                       | NP_110435.1       | 3          | 2                 | 2          | 4      | 0.84                                                     | 0.84                                                     | 5.18                                                                                   | 0.12                                                                                   | 6.1                                                                                           | 0.1                                                                                           | 2                                                                              | 2                                                                              | 6340     | 81565          | mdeE nuclear distribution gene E homolog like 1(A, nidulans)                                                                     | Molecular function unknown                    | Centrosome           | Cell cycle control protein                     | Cell growth and/or maintenance                                   | CC                   | Yes                      |  |
| WDR41       | 55255   | WD repeat-containing protein 41                                                           | NP_060738.2       | 1          | 1                 | 1          | 8      | 0.84                                                     | 0.83                                                     |                                                                                        |                                                                                        |                                                                                               |                                                                                               | 1                                                                              | 1                                                                              | 7714     | 55255          | WD repeat domain 41                                                                                                              | Molecular function unknown                    | -                    | Unclassified                                   | Biological process unknown                                       | WD40                 | Yes                      |  |

Supplementary Table S1. List of quantified proteins in OKF6/TERT1-Smoke cells

Ratnagonalan *et al.*, 2017. Role of protein kinase N2 (PKN2) in cigarette smoke-mediated oncogenic transformation of oral cells

| Gene Symbol | Gene ID | Protein Description                                                         | Protein Accession | # Proteins | # Unique Peptides | # Peptides | # PSMs | OKF6/TERT1-Smoke/<br>OKF6/TERT1-Parental<br>(130/126) R1 | OKF6/TERT1-Smoke/<br>OKF6/TERT1-Parental<br>(128/127) R2 | Ratio Standard Errors [%]:<br>OKF6/TERT1-Smoke/<br>OKF6/TERT1-Parental<br>(130/126) R1 | Ratio Standard Errors [%]:<br>OKF6/TERT1-Smoke/<br>OKF6/TERT1-Parental<br>(128/127) R2 | Ratio Variabilities [%]:<br>F13: OKF6/TERT1-<br>Smoke/<br>OKF6/TERT1-Parental<br>(130/126) R1 | Ratio Variabilities [%]:<br>F13: OKF6/TERT1-<br>Smoke/<br>OKF6/TERT1-Parental<br>(128/127) R2 | Ratio Counts: F13:<br>OKF6/TERT1-Smoke/<br>OKF6/TERT1-Parental<br>(130/126) R1 | Ratio Counts: F13:<br>OKF6/TERT1-Smoke/<br>OKF6/TERT1-Parental<br>(128/127) R2 | HPRD ID | Entrez Gene ID | Gene Name                                                                            | Molecular Function                         | Primary Localization  | Molecular Class                    | Biological Process                                               | Domains             | Plasma Proteome Database |  |  |
|-------------|---------|-----------------------------------------------------------------------------|-------------------|------------|-------------------|------------|--------|----------------------------------------------------------|----------------------------------------------------------|----------------------------------------------------------------------------------------|----------------------------------------------------------------------------------------|-----------------------------------------------------------------------------------------------|-----------------------------------------------------------------------------------------------|--------------------------------------------------------------------------------|--------------------------------------------------------------------------------|---------|----------------|--------------------------------------------------------------------------------------|--------------------------------------------|-----------------------|------------------------------------|------------------------------------------------------------------|---------------------|--------------------------|--|--|
| CAMK2G      | 818     | calcium/calmodulin-dependent protein kinase type II subunit gamma isoform 1 | NP_751911.1       | 16         | 2                 | 4          | 7      | 0.84                                                     | 0.81                                                     | 0.21                                                                                   | 13.68                                                                                  | 0.3                                                                                           | 15.7                                                                                          | 2                                                                              | 2                                                                              | 3672    | 818            | calcium/calmodulin-dependent protein kinase (CaM kinase) II gamma                    | Protein serine/threonine kinase activity   | Cytoplasm             | Serine/threonine kinase            | Cell communication;Signal transduction                           | S_T_kinase          | Yes                      |  |  |
| FAM114A2    | 10827   | protein FAM114A2                                                            | NP_061161.2       | 1          | 8                 | 8          | 25     | 0.84                                                     | 0.8                                                      | 5.55                                                                                   | 23.62                                                                                  | 14                                                                                            | 62                                                                                            | 9                                                                              | 9                                                                              | 12831   | 10827          | chromosome 5 open reading frame 3                                                    | Molecular function unknown                 | -                     | Unclassified                       | Biological process unknown                                       | CC                  | No                       |  |  |
| ATPIF1      | 93974   | ATPase inhibitor, mitochondrial isoform 1 precursor                         | NP_057395.1       | 3          | 1                 | 1          | 1      | 0.84                                                     | 0.79                                                     |                                                                                        |                                                                                        |                                                                                               |                                                                                               | 1                                                                              | 1                                                                              | 16529   | 93974          | ATPase inhibitory factor 1                                                           | Enzyme inhibitor activity                  | Mitochondrion         | Enzyme regulator                   | Energy pathways                                                  | -                   | No                       |  |  |
| SMAD4       | 4089    | mothers against decapentaplegic homolog 4                                   | NP_005350.1       | 1          | 2                 | 2          | 2      | 0.84                                                     | 0.79                                                     |                                                                                        |                                                                                        |                                                                                               |                                                                                               | 1                                                                              | 1                                                                              | 2995    | 4089           | SMAD, mothers against DPP homolog 4 (Drosophila)                                     | Transcription factor activity              | Nucleus               | Transcription factor               | Regulation of nucleobase, nucleotide and nucleic acid metabolism | SAD;CC              | No                       |  |  |
| CAMSAP2     | 23271   | calmodulin-regulated spectrin-associated protein 2 isoform 1                | NP_001284636.1    | 3          | 8                 | 8          | 14     | 0.84                                                     | 0.76                                                     | 9.54                                                                                   | 22.49                                                                                  | 21.4                                                                                          | 47.8                                                                                          | 7                                                                              | 7                                                                              |         |                |                                                                                      |                                            |                       |                                    |                                                                  |                     |                          |  |  |
| CYFIP1      | 23191   | cytoplasmic FMR1-interacting protein 1 isoform a                            | NP_055423.1       | 2          | 19                | 19         | 48     | 0.84                                                     | 0.76                                                     | 5.48                                                                                   | 7.07                                                                                   | 23.7                                                                                          | 27.8                                                                                          | 26                                                                             | 26                                                                             | 5890    | 23191          | cytoplasmic FMR1 interacting protein 1                                               | Molecular function unknown                 | Cytoplasm             | Unclassified                       | Biological process unknown                                       | -                   | Yes                      |  |  |
| RIPK1       | 8737    | receptor-interacting serine/threonine-protein kinase 1                      | NP_003795.2       | 1          | 3                 | 3          | 5      | 0.84                                                     | 0.75                                                     | 1.19                                                                                   | 44.76                                                                                  | 1.7                                                                                           | 63.7                                                                                          | 3                                                                              | 3                                                                              | 4583    | 8737           | receptor (TNFRSF)-interacting serine-threonine kinase 1                              | Protein serine/threonine kinase activity   | Cytoplasm             | Serine/threonine kinase            | Cell communication                                               | S_T_kinase;DEATH;CC | Yes                      |  |  |
| CDH1        | 999     | cadherin-1 preproprotein                                                    | NP_004351.1       | 1          | 9                 | 12         | 29     | 0.84                                                     | 0.73                                                     | 6.52                                                                                   | 7.05                                                                                   | 22.8                                                                                          | 21.4                                                                                          | 17                                                                             | 17                                                                             | 1885    | 999            | cadherin 1, type 1, E-cadherin (epithelial)                                          | Cell adhesion molecule activity            | Plasma membrane       | Adhesion molecule                  | Cell communication;Signal transduction                           | TM;Cadherin;SP      | Yes                      |  |  |
| RPL22L1     | 200916  | 60S ribosomal protein L22-like 1                                            | NP_001093115.1    | 1          | 1                 | 1          | 2      | 0.84                                                     | 0.72                                                     |                                                                                        |                                                                                        |                                                                                               |                                                                                               | 1                                                                              | 1                                                                              | 19507   | 200916         | ribosomal protein L22-like 1                                                         | Structural constituent of ribosome         | -                     | Unclassified                       | Translation                                                      | -                   | Yes                      |  |  |
| ARL8B       | 55207   | ADP-ribosylation factor-like protein 8B                                     | NP_060654.1       | 2          | 2                 | 5          | 19     | 0.84                                                     | 0.69                                                     | 16.9                                                                                   | 33.07                                                                                  | 28.9                                                                                          | 47.7                                                                                          | 4                                                                              | 4                                                                              | 12483   | 55207          | ADP-ribosylation factor-like 10C                                                     | GTPase activity                            | Cytoskeleton          | GTPase                             | Cell communication;Signal transduction                           | -                   | No                       |  |  |
| TPT1        | 7178    | translationally-controlled tumor protein isoform 1                          | NP_001273201.1    | 4          | 9                 | 9          | 68     | 0.84                                                     | 0.69                                                     | 12.76                                                                                  | 29.51                                                                                  | 63                                                                                            | 144.4                                                                                         | 29                                                                             | 27                                                                             | 15979   | 7178           | tumor protein, translationally-controlled 1                                          | Calcium ion binding                        | Nucleus               | Calcium binding protein            | Cell growth and/or maintenance                                   | -                   | Yes                      |  |  |
| RAB31       | 11031   | ras-related protein Rab-31                                                  | NP_006859.2       | 1          | 2                 | 4          | 9      | 0.84                                                     | 0.67                                                     | 17.72                                                                                  | 2.64                                                                                   | 21.2                                                                                          | 2.5                                                                                           | 2                                                                              | 2                                                                              | 5751    | 11031          | RAB31, member RAS oncogene family                                                    | GTPase activity                            | Plasma membrane       | GTPase                             | Cell communication;Signal transduction                           | RAB                 | Yes                      |  |  |
| RRAGB       | 10325   | ras-related GTP-binding protein B long isoform                              | NP_057740.2       | 3          | 3                 | 3          | 3      | 0.84                                                     | 0.62                                                     | 15.93                                                                                  | 42.92                                                                                  | 19.1                                                                                          | 38.8                                                                                          | 2                                                                              | 2                                                                              | 6710    | 10325          | Ras-related GTP binding B                                                            | Guanyl-nucleotide exchange factor activity | Cytoplasm             | Guanine nucleotide exchange factor | Cell communication;Signal transduction                           | -                   | No                       |  |  |
| ANO10       | 55129   | anoctamin-10 isoform 1                                                      | NP_060545.3       | 5          | 4                 | 4          | 6      | 0.84                                                     | 0.55                                                     | 4.78                                                                                   | 23                                                                                     | 6.9                                                                                           | 22                                                                                            | 3                                                                              | 3                                                                              | 7667    | 55129          | None                                                                                 | Molecular function unknown                 | -                     | Integral membrane protein          | Biological process unknown                                       | TM                  | No                       |  |  |
| POT1        | 653269  | POTE ankyrin domain family member 1                                         | NP_001264335.1    | 1          | 2                 | 12         | 272    | 0.84                                                     | 0.52                                                     | 4.44                                                                                   | 11.7                                                                                   | 21                                                                                            | 34.8                                                                                          | 31                                                                             | 31                                                                             |         |                |                                                                                      |                                            |                       |                                    |                                                                  |                     |                          |  |  |
| WDR13       | 64743   | WD repeat-containing protein 13 isoform 1                                   | NP_060353.2       | 2          | 1                 | 1          | 1      | 0.83                                                     | 1.49                                                     |                                                                                        |                                                                                        |                                                                                               |                                                                                               | 1                                                                              | 1                                                                              | 6753    | 64743          | WD repeat domain 13                                                                  | Transcription regulator activity           | Nucleus               | Transcription regulatory protein   | Regulation of nucleobase, nucleotide and nucleic acid metabolism | WD40                | Yes                      |  |  |
| RXRβ        | 6257    | retinoic acid receptor RXR-beta isoform 1                                   | NP_001257330.1    | 8          | 3                 | 3          | 3      | 0.83                                                     | 1.46                                                     | 47.27                                                                                  | 43.57                                                                                  | 59.7                                                                                          | 111.9                                                                                         | 2                                                                              | 2                                                                              | 1578    | 6257           | retinoid X receptor, beta                                                            | Ligand-dependent nuclear receptor activity | Nucleus               | Nuclear receptor                   | Cell communication;Signal transduction                           | ZnF_C4;HOL1         | Yes                      |  |  |
| SSU72       | 29101   | RNA polymerase II subunit A C-terminal domain phosphatase SSU72             | NP_054907.1       | 1          | 3                 | 3          | 4      | 0.83                                                     | 1.43                                                     | 0.62                                                                                   | 11.63                                                                                  | 0.9                                                                                           | 29.3                                                                                          | 3                                                                              | 3                                                                              | 13712   | 29101          | Ssu72 RNA polymerase II CTD phosphatase homolog (yeast)                              | Molecular function unknown                 | -                     | Unclassified                       | Biological process unknown                                       | -                   | No                       |  |  |
| RPS15A      | 6210    | 40S ribosomal protein S15a                                                  | NP_001010.2       | 1          | 10                | 10         | 43     | 0.83                                                     | 1.41                                                     | 9.61                                                                                   | 13.86                                                                                  | 37.9                                                                                          | 110.7                                                                                         | 21                                                                             | 21                                                                             | 4723    | 6210           | ribosomal protein S15a                                                               | Structural constituent of ribosome         | Ribosome              | Ribosomal subunit                  | Protein metabolism                                               | -                   | Yes                      |  |  |
| CRYZ        | 1429    | quinone oxidoreductase isoform a                                            | NP_001880.2       | 3          | 12                | 12         | 43     | 0.83                                                     | 1.31                                                     | 5.1                                                                                    | 7.6                                                                                    | 21.5                                                                                          | 52.9                                                                                          | 25                                                                             | 25                                                                             | 437     | 1429           | crystallin, zeta (quinone reductase)                                                 | Oxidoreductase activity                    | Cytoplasm             | Enzyme: Oxidoreductase             | Metabolism;Energy pathways                                       | -                   | Yes                      |  |  |
| TMCO1       | 54499   | transmembrane and coiled-coil domain-containing protein 1 isoform a         | NP_061899.2       | 3          | 3                 | 3          | 15     | 0.83                                                     | 1.3                                                      | 11.2                                                                                   | 6.04                                                                                   | 25.1                                                                                          | 20.9                                                                                          | 7                                                                              | 7                                                                              | 14243   | 54499          | transmembrane and coiled-coil domains 4                                              | Molecular function unknown                 | Endoplasmic reticulum | Integral membrane protein          | Biological process unknown                                       | CC;TM               | Yes                      |  |  |
| GAPDH       | 2597    | glyceraldehyde-3-phosphate dehydrogenase isoform 1                          | NP_002037.2       | 3          | 26                | 26         | 525    | 0.83                                                     | 1.28                                                     | 2.8                                                                                    | 3.07                                                                                   | 38.7                                                                                          | 70.2                                                                                          | 259                                                                            | 258                                                                            | 713     | 2597           | glyceraldehyde-3-phosphate dehydrogenase                                             | Catalytic activity                         | Cytoplasm             | Enzyme: Dehydrogenase              | Metabolism;Energy pathways                                       | -                   | Yes                      |  |  |
| ENO1        | 2023    | alpha-enolase isoform 1                                                     | NP_001419.1       | 2          | 28                | 31         | 407    | 0.83                                                     | 1.28                                                     | 3.04                                                                                   | 2.6                                                                                    | 34.6                                                                                          | 46.3                                                                                          | 177                                                                            | 177                                                                            | 1400    | 2023           | enolase 1, (alpha)                                                                   | Enzyme: Hydratase                          | Cytoplasm             | Enzyme: Hydratase                  | Metabolism;Energy pathways                                       | -                   | Yes                      |  |  |
| ASCL1       | 429     | achaete-scute homolog 1                                                     | NP_004307.2       | 1          | 1                 | 1          | 1      | 0.83                                                     | 1.27                                                     |                                                                                        |                                                                                        |                                                                                               |                                                                                               | 1                                                                              | 1                                                                              | 11      | 429            | achaete-scute complex-like 1 (Drosophila)                                            | Transcription factor activity              | Nucleus               | Transcription factor               | Regulation of nucleobase, nucleotide and nucleic acid metabolism | HLH                 | No                       |  |  |
| MTRR        | 4552    | methionine synthase reductase isoform 2                                     | NP_076915.2       | 2          | 2                 | 2          | 4      | 0.83                                                     | 1.2                                                      | 25.02                                                                                  | 28.96                                                                                  | 30.1                                                                                          | 52.3                                                                                          | 2                                                                              | 2                                                                              | 3979    | 4552           | 5-methyltetrahydrofolate-homocysteinemethyltransferase reductase (Homo sapiens)Other | Oxidoreductase activity                    | Cytoplasm             | Enzyme: Oxidoreductase             | Metabolism;Energy pathways                                       | -                   | Yes                      |  |  |
| ATG12       | 9140    | ubiquitin-like protein ATG12 isoform 1                                      | NP_004698.3       | 1          | 1                 | 1          | 1      | 0.83                                                     | 1.18                                                     |                                                                                        |                                                                                        |                                                                                               |                                                                                               | 1                                                                              | 1                                                                              | 8496    | 9140           | APG12 autophagy 12-like (S. cerevisiae)                                              | Molecular function unknown                 | Cytoplasm             | Unclassified                       | Biological process unknown                                       | -                   | Yes                      |  |  |

Supplementary Table S1. List of quantified proteins in OKF6/TERT1-Smoke cells  
 Raigonalan *et al.*, 2017. Role of protein kinase N2 (PKN2) in cigarette smoke-mediated oncogenic transformation of oral cells

| Gene Symbol | Gene ID | Protein Description                                                             | Protein Accession | # Proteins | # Unique Peptides | # Peptides | # PSMs | OKF6/TERT1-Smoke/<br>OKF6/TERT1-Parental<br>(130/126) R1 | OKF6/TERT1-Smoke/<br>OKF6/TERT1-Parental<br>(128/127) R2 | Ratio Standard Errors [%]:<br>OKF6/TERT1-Smoke/<br>OKF6/TERT1-Parental<br>(130/126) R1 | Ratio Standard Errors [%]:<br>OKF6/TERT1-Smoke/<br>OKF6/TERT1-Parental<br>(128/127) R2 | Ratio Variabilities [%]:<br>F13: OKF6/TERT1-<br>Smoke/<br>OKF6/TERT1-Parental<br>(130/126) R1 | Ratio Variabilities [%]:<br>F13: OKF6/TERT1-<br>Smoke/<br>OKF6/TERT1-Parental<br>(128/127) R2 | Ratio Counts: F13:<br>OKF6/TERT1-Smoke/<br>OKF6/TERT1-Parental<br>(130/126) R1 | Ratio Counts: F13:<br>OKF6/TERT1-Smoke/<br>OKF6/TERT1-Parental<br>(128/127) R2 | HPRD ID | Entrez Gene ID | Gene Name                                                                                                            | Molecular Function                                                       | Primary Localization      | Molecular Class                        | Biological Process                                                           | Domains        | Plasma Proteome Database |  |
|-------------|---------|---------------------------------------------------------------------------------|-------------------|------------|-------------------|------------|--------|----------------------------------------------------------|----------------------------------------------------------|----------------------------------------------------------------------------------------|----------------------------------------------------------------------------------------|-----------------------------------------------------------------------------------------------|-----------------------------------------------------------------------------------------------|--------------------------------------------------------------------------------|--------------------------------------------------------------------------------|---------|----------------|----------------------------------------------------------------------------------------------------------------------|--------------------------------------------------------------------------|---------------------------|----------------------------------------|------------------------------------------------------------------------------|----------------|--------------------------|--|
| NCEH1       | 57552   | neutral cholesterol ester hydrolase 1 isoform a                                 | NP_001139748.1    | 3          | 6                 | 6          | 34     | 0.83                                                     | 1.14                                                     | 5.45                                                                                   | 5.2                                                                                    | 17                                                                                            | 22.5                                                                                          | 14                                                                             | 14                                                                             | 7489    | 57552          | arylacetylamine deacetylase-like 1                                                                                   | Molecular function unknown                                               | -                         | Unclassified                           | Biological process unknown                                                   | SP             | No                       |  |
| FSCN2       | 25794   | fascin-2 isoform 2                                                              | NP_001070650.1    | 2          | 1                 | 1          | 2      | 0.83                                                     | 1.14                                                     | 13.01                                                                                  | 5.86                                                                                   | 15.3                                                                                          | 9.5                                                                                           | 2                                                                              | 2                                                                              | 6366    | 25794          | fascin homolog 2, actin-binding protein,retinal (Strongylocentrotus purpuratus)                                      | Structural molecule activity                                             | Cytoplasm;Plasma membrane | Structural protein                     | Cell growth and/or maintenance                                               | -              | Yes                      |  |
| VP526B      | 112936  | vacuolar protein sorting-associated protein 26B                                 | NP_443107.1       | 1          | 4                 | 4          | 7      | 0.83                                                     | 1.1                                                      | 9                                                                                      | 26.25                                                                                  | 15                                                                                            | 63                                                                                            | 4                                                                              | 4                                                                              | 14395   | 112936         | None                                                                                                                 | Transporter activity                                                     | Plasma membrane           | Transport/cargo protein                | Transport                                                                    | -              | No                       |  |
| PP1G        | 9360    | peptidyl-prolyl cis-trans isomerase G                                           | NP_004783.2       | 1          | 4                 | 4          | 6      | 0.83                                                     | 1.07                                                     | 14.93                                                                                  | 23.4                                                                                   | 17.7                                                                                          | 36.6                                                                                          | 2                                                                              | 2                                                                              | 12083   | 9360           | peptidyl-prolyl isomerase G (cyclophilin G)                                                                          | Isomerase activity                                                       | Nucleus                   | Enzyme: isomerase                      | Metabolism;Energy pathways                                                   | -              | Yes                      |  |
| THNSL1      | 79896   | threonine synthase-like 1                                                       | NP_079114.3       | 1          | 1                 | 1          | 1      | 0.83                                                     | 1.06                                                     |                                                                                        |                                                                                        |                                                                                               |                                                                                               | 1                                                                              | 1                                                                              | 7974    | 79896          | threonine synthase-like 1 (bacterial)                                                                                | Molecular function unknown                                               | -                         | Unclassified                           | Biological process unknown                                                   | -              | Yes                      |  |
| NUP160      | 23279   | nuclear pore complex protein Nup160                                             | NP_056046.1       | 1          | 11                | 11         | 24     | 0.83                                                     | 1.05                                                     | 9.11                                                                                   | 5.62                                                                                   | 29                                                                                            | 22.3                                                                                          | 14                                                                             | 14                                                                             | 16254   | 23279          | nucleoporin 160kDa                                                                                                   | Transporter activity                                                     | Nucleus                   | Transport/cargo protein                | Transport                                                                    | -              | Yes                      |  |
| ORC5        | 5001    | origin recognition complex subunit 5 isoform 1                                  | NP_002544.1       | 2          | 3                 | 3          | 5      | 0.83                                                     | 1.04                                                     | 9.61                                                                                   | 1.5                                                                                    | 13.8                                                                                          | 2.7                                                                                           | 3                                                                              | 3                                                                              |         |                |                                                                                                                      |                                                                          |                           |                                        |                                                                              |                |                          |  |
| OAS2        | 4939    | 2'-5'-oligoadenylate synthase 2 isoform 2                                       | NP_002526.2       | 4          | 16                | 16         | 33     | 0.83                                                     | 1.03                                                     | 3.35                                                                                   | 5.36                                                                                   | 11.8                                                                                          | 23.6                                                                                          | 18                                                                             | 18                                                                             | 4518    | 4939           | 2'-5'-oligoadenylate synthetase 2, 69/71kDa                                                                          | Ligase activity                                                          | Cytoplasm                 | Enzyme: Ligase                         | Immune response                                                              | -              | Yes                      |  |
| UBP1        | 51506   | ubiquitin-fold modifier-conjugating enzyme 1                                    | NP_057490.2       | 1          | 2                 | 2          | 3      | 0.83                                                     | 1.01                                                     | 3.16                                                                                   | 7.24                                                                                   | 3.7                                                                                           | 10.4                                                                                          | 2                                                                              | 2                                                                              | 15643   | 51506          | ubiquitin-fold modifier conjugating enzyme 1                                                                         | Molecular function unknown                                               | -                         | Unclassified                           | Protein metabolism                                                           | -              | Yes                      |  |
| MRPS24      | 64951   | 28S ribosomal protein S24, mitochondrial precursor                              | NP_114403.1       | 1          | 1                 | 1          | 1      | 0.83                                                     | 1                                                        |                                                                                        |                                                                                        |                                                                                               |                                                                                               | 1                                                                              | 1                                                                              | 17593   | 64951          | mitochondrial ribosomal protein S24                                                                                  | Structural constituent of ribosome                                       | Mitochondrion             | Ribosomal subunit                      | Protein metabolism                                                           | -              | No                       |  |
| UNG         | 7374    | uracil-DNA glycosylase isoform UNG2                                             | NP_550433.1       | 2          | 1                 | 1          | 1      | 0.83                                                     | 0.98                                                     |                                                                                        |                                                                                        |                                                                                               |                                                                                               | 1                                                                              | 1                                                                              | 1881    | 7374           | uracil-DNA glycosylase                                                                                               | DNA binding,DNA repair protein                                           | Nucleus,Cytoplasm         | DNA binding protein,DNA repair protein | DNA repair                                                                   | -              | Yes                      |  |
| LSM1        | 27257   | U6 snRNA-associated Sm-like protein LSM1                                        | NP_055277.1       | 1          | 2                 | 2          | 4      | 0.83                                                     | 0.98                                                     |                                                                                        |                                                                                        |                                                                                               |                                                                                               | 1                                                                              | 1                                                                              | 6281    | 27257          | LSM1 homolog, U6 snRNA associated(S. cerevisiae)                                                                     | RNA binding                                                              | Cytoplasm                 | RNA binding protein                    | Regulation of nucleobase, nucleoside and nucleic acid metabolism             | SM,CC          | Yes                      |  |
| COG6        | 57511   | conserved oligomeric Golgi complex subunit 6 isoform 1                          | NP_065802.1       | 2          | 5                 | 5          | 8      | 0.83                                                     | 0.96                                                     | 2.39                                                                                   | 6.59                                                                                   | 4.4                                                                                           | 14.3                                                                                          | 5                                                                              | 5                                                                              | 8445    | 57511          | component of oligomeric golgi complex 6                                                                              | Structural molecule activity                                             | Golgi apparatus           | Structural protein                     | Transport                                                                    | CC             | Yes                      |  |
| RPL18A      | 6142    | 60S ribosomal protein L18a                                                      | NP_000971.1       | 1          | 12                | 12         | 46     | 0.83                                                     | 0.95                                                     | 9.74                                                                                   | 7                                                                                      | 38.5                                                                                          | 31.2                                                                                          | 21                                                                             | 21                                                                             | 16045   | 6142           | ribosomal protein L18a                                                                                               | RNA binding                                                              | Cytoplasm                 | RNA binding protein                    | Regulation of nucleobase, nucleoside, nucleotide and nucleic acid metabolism | -              | Yes                      |  |
| UCKL1       | 54963   | uridine-cytidine kinase-like 1 isoform 1                                        | NP_060329.2       | 1          | 1                 | 1          | 2      | 0.83                                                     | 0.95                                                     |                                                                                        |                                                                                        |                                                                                               |                                                                                               | 1                                                                              | 1                                                                              | 15607   | 54963          | uridine-cytidine kinase 1-like 1                                                                                     | Transferase activity                                                     | Cytoplasm                 | Enzyme: Transferase                    | Regulation of nucleobase, nucleoside, nucleotide and nucleic acid metabolism | -              | Yes                      |  |
| AGL         | 178     | glycogen debranching enzyme isoform 1                                           | NP_000191.2       | 3          | 7                 | 7          | 10     | 0.83                                                     | 0.93                                                     | 3.19                                                                                   | 8.09                                                                                   | 6.5                                                                                           | 18.6                                                                                          | 6                                                                              | 6                                                                              | 1984    | 178            | amylo-1, 6-galactosidase,4-alpha-glucanotransferase (glycogen debranching enzyme, glycogen storage disease type III) | Glycosidase activity                                                     | Cytoplasm                 | Enzyme: Glycosidase                    | Carbohydrate metabolism;Energy pathways                                      | -              | Yes                      |  |
| VTA1        | 51534   | vacuolar protein sorting-associated protein VTA1 homolog isoform a              | NP_057569.2       | 3          | 4                 | 4          | 13     | 0.83                                                     | 0.93                                                     | 17.15                                                                                  | 12.37                                                                                  | 35.9                                                                                          | 28.8                                                                                          | 6                                                                              | 6                                                                              | 9855    | 51534          | chromosome 6 open reading frame 55                                                                                   | Molecular function unknown                                               | -                         | Unclassified                           | Biological process unknown                                                   | -              | Yes                      |  |
| PCDH16      | 57717   | protocadherin beta-16 precursor                                                 | NP_066008.2       | 1          | 1                 | 1          | 2      | 0.83                                                     | 0.92                                                     |                                                                                        |                                                                                        |                                                                                               |                                                                                               | 1                                                                              | 1                                                                              | 6961    | 57717          | protocadherin beta 16                                                                                                | Cell adhesion molecule activity                                          | Plasma membrane           | Adhesion molecule                      | Cell communication;Signal transduction                                       | SP,Cadherin,TM | Yes                      |  |
| LRCH1       | 23143   | leucine-rich repeat and calponin homology domain-containing protein 1 isoform 1 | NP_001157683.1    | 5          | 2                 | 2          | 7      | 0.83                                                     | 0.92                                                     | 9.19                                                                                   | 1.97                                                                                   | 15.3                                                                                          | 3.6                                                                                           | 4                                                                              | 4                                                                              | 14307   | 23143          | leucine-rich repeats and calponin homology (CH)domain containing 1                                                   | Molecular function unknown                                               | -                         | Unclassified                           | Biological process unknown                                                   | LRR,CH         | Yes                      |  |
| ARFGAP1     | 10565   | brefeldin A-inhibited guanine nucleotide-exchange protein 1                     | NP_006412.2       | 1          | 4                 | 7          | 10     | 0.83                                                     | 0.92                                                     | 7.41                                                                                   | 3.73                                                                                   | 12.3                                                                                          | 6.9                                                                                           | 4                                                                              | 4                                                                              | 9163    | 10565          | ADP-ribosylation factor guanine nucleotide exchange factor 1(brefeldin A-inhibited)                                  | Guanyl-nucleotide exchange factor activity                               | Golgi apparatus           | Guanine nucleotide exchange factor     | Cell communication;Signal transduction                                       | Sec7           | Yes                      |  |
| RB1         | 5925    | retinoblastoma-associated protein                                               | NP_000312.2       | 1          | 1                 | 1          | 2      | 0.83                                                     | 0.91                                                     |                                                                                        |                                                                                        |                                                                                               |                                                                                               | 1                                                                              | 1                                                                              | 1574    | 5925           | retinoblastoma 1 (including osteosarcoma)                                                                            | Transcription regulator activity                                         | Nucleus                   | Transcription regulatory protein       | Regulation of nucleobase, nucleoside, nucleotide and nucleic acid metabolism | CYCLIN_N       | Yes                      |  |
| EXOC3       | 11336   | exocyst complex component 3                                                     | NP_009208.2       | 1          | 4                 | 4          | 7      | 0.83                                                     | 0.9                                                      | 1.31                                                                                   | 5.25                                                                                   | 2.2                                                                                           | 9.4                                                                                           | 4                                                                              | 4                                                                              | 9738    | 11336          | SEC6-like 1 (S. cerevisiae)                                                                                          | Auxiliary transport protein activity                                     | Plasma membrane           | Membrane transport protein             | Transport                                                                    | -              | Yes                      |  |
| FKBP8       | 23770   | peptidyl-prolyl cis-trans isomerase FKBP8 isoform 1                             | NP_036313.3       | 2          | 7                 | 7          | 20     | 0.83                                                     | 0.89                                                     | 10.01                                                                                  | 7.58                                                                                   | 26.9                                                                                          | 21.5                                                                                          | 10                                                                             | 10                                                                             | 5327    | 23770          | FK506 binding protein 8, 38kDa                                                                                       | Receptor signaling complex scaffold activity;Protease inhibitor activity | Mitochondrion             | Adapter molecule                       | Apoptosis                                                                    | TPR,I2,TM      | Yes                      |  |
| GCC2        | 9648    | GRIP and coiled-coil domain-containing protein 2                                | NP_852118.1       | 5          | 2                 | 3          | 6      | 0.83                                                     | 0.88                                                     | 24.86                                                                                  | 30.95                                                                                  | 29.8                                                                                          | 40                                                                                            | 2                                                                              | 2                                                                              | 11001   | 9648           | GRIP and coiled-coil domain containing 2                                                                             | Structural molecule activity                                             | Golgi apparatus           | Structural protein                     | Cell growth and/or maintenance                                               | CC,GRIP        | Yes                      |  |

Supplementary Table S1. List of quantified proteins in OKF6/TERT1-Smoke cells  
 Raingopaln *et al.*, 2017. Role of protein kinase N2 (PKN2) in cigarette smoke-mediated oncogenic transformation of oral cells

| Gene Symbol | Gene ID | Protein Description                                                                   | Protein Accession | # Proteins | # Unique Peptides | # Peptides | # PSMs | OKF6/TERT1-Smoke/<br>OKF6/TERT1-Parental<br>(130/126) R1 | OKF6/TERT1-Smoke/<br>OKF6/TERT1-Parental<br>(128/127) R2 | Ratio Standard Errors [%]:<br>OKF6/TERT1-Smoke/<br>OKF6/TERT1-Parental<br>(130/126) R1 | Ratio Standard Errors [%]:<br>OKF6/TERT1-Smoke/<br>OKF6/TERT1-Parental<br>(128/127) R2 | Ratio Variabilities [%]:<br>F13: OKF6/TERT1-<br>Smoke/<br>OKF6/TERT1-Parental<br>(130/126) R1 | Ratio Variabilities [%]:<br>F13: OKF6/TERT1-<br>Smoke/<br>OKF6/TERT1-Parental<br>(128/127) R2 | Ratio Counts: F13:<br>OKF6/TERT1-Smoke/<br>OKF6/TERT1-Parental<br>(130/126) R1 | Ratio Counts: F13:<br>OKF6/TERT1-Smoke/<br>OKF6/TERT1-Parental<br>(128/127) R2 | HPRD ID | Entrez Gene Id | Gene Name                                                                 | Molecular Function                       | Primary Localization | Molecular Class                         | Biological Process                                                           | Domains                  | Plasma Proteome Database |
|-------------|---------|---------------------------------------------------------------------------------------|-------------------|------------|-------------------|------------|--------|----------------------------------------------------------|----------------------------------------------------------|----------------------------------------------------------------------------------------|----------------------------------------------------------------------------------------|-----------------------------------------------------------------------------------------------|-----------------------------------------------------------------------------------------------|--------------------------------------------------------------------------------|--------------------------------------------------------------------------------|---------|----------------|---------------------------------------------------------------------------|------------------------------------------|----------------------|-----------------------------------------|------------------------------------------------------------------------------|--------------------------|--------------------------|
| MDN1        | 23195   | midasin                                                                               | NP_055426.1       | 1          | 2                 | 2          | 3      | 0.83                                                     | 0.88                                                     |                                                                                        |                                                                                        |                                                                                               |                                                                                               | 1                                                                              | 1                                                                              | 10069   | 23195          | MDN1, midasin homolog (yeast)                                             | Chaperone activity                       | Nucleus              | Chaperone                               | Regulation of nucleobase, nucleoside, nucleotide and nucleic acid metabolism | AAA,VWA,CC               | Yes                      |
| STAT6       | 6778    | signal transducer and activator of transcription 6 isoform 1                          | NP_003144.3       | 2          | 7                 | 7          | 7      | 0.83                                                     | 0.88                                                     | 13.41                                                                                  | 13.01                                                                                  | 25.4                                                                                          | 25.9                                                                                          | 5                                                                              | 5                                                                              | 3302    | 6778           | signal transducer and activator of transcription 6, interleukin-4 induced | Transcription factor activity            | Cytoplasm            | Transcription factor                    | Regulation of nucleobase, nucleoside, nucleotide and nucleic acid metabolism | SH2                      | Yes                      |
| GLUD1       | 2746    | glutamate dehydrogenase 1, mitochondrial precursor                                    | NP_005262.1       | 2          | 26                | 26         | 94     | 0.83                                                     | 0.87                                                     | 4.23                                                                                   | 4.24                                                                                   | 26.1                                                                                          | 27.8                                                                                          | 54                                                                             | 54                                                                             | 11748   | 2746           | glutamate dehydrogenase 1                                                 | Catalytic activity                       | Mitochondrion        | Enzyme: Dehydrogenase                   | Metabolism;Energy pathways                                                   | SP                       | Yes                      |
| CAND1       | 55832   | cullin-associated NEDD8-dissociated protein 1                                         | NP_060918.2       | 1          | 41                | 43         | 140    | 0.83                                                     | 0.86                                                     | 3.01                                                                                   | 3.41                                                                                   | 20.5                                                                                          | 24.1                                                                                          | 65                                                                             | 65                                                                             | 6983    | 55832          | cullin-associated and neddylation-dissociated 1                           | Transcription regulator activity         | Nucleus              | Transcription regulatory protein        | Regulation of nucleobase, nucleoside, nucleotide and nucleic acid metabolism | -                        | Yes                      |
| ARHGAP5     | 394     | rho GTPase-activating protein 5 isoform a                                             | NP_001025226.1    | 2          | 7                 | 7          | 11     | 0.83                                                     | 0.86                                                     | 2.6                                                                                    | 18.09                                                                                  | 5.3                                                                                           | 39.7                                                                                          | 6                                                                              | 6                                                                              | 4060    | 394            | Rho GTPase activating protein 5                                           | GTPase activator activity                | Cytoplasm            | GTPase activating protein               | Cell communication;Signal transduction                                       | RHO GAP,FF,Sma IL_GTPase | Yes                      |
| ERLIN2      | 11160   | erlin-2 isoform 1                                                                     | NP_009106.1       | 2          | 9                 | 12         | 44     | 0.83                                                     | 0.86                                                     | 9.59                                                                                   | 18.14                                                                                  | 32.6                                                                                          | 66.6                                                                                          | 16                                                                             | 15                                                                             | 15437   | 11160          | SPFH domain family, member 2                                              | Molecular function unknown               | -                    | Unclassified                            | Biological process unknown                                                   | PHB;TM                   | Yes                      |
| TPM2        | 7169    | tropomyosin beta chain isoform Tpm2.1.smcy                                            | NP_998839.1       | 4          | 13                | 23         | 51     | 0.83                                                     | 0.86                                                     | 8.01                                                                                   | 5.65                                                                                   | 25.4                                                                                          | 18.4                                                                                          | 14                                                                             | 14                                                                             | 11768   | 7169           | tropomyosin 2 (beta)                                                      | Structural constituent of cytoskeleton   | Cytoskeleton         | Cytoskeletal protein                    | Cell growth and/or maintenance                                               | -                        | Yes                      |
| ALCAM       | 214     | CD166 antigen isoform 1 precursor                                                     | NP_001618.2       | 4          | 16                | 16         | 56     | 0.83                                                     | 0.85                                                     | 5.88                                                                                   | 3.94                                                                                   | 24.2                                                                                          | 16.6                                                                                          | 24                                                                             | 24                                                                             | 3389    | 214            | activated leukocyte cell adhesion molecule                                | Cell adhesion molecule activity          | Plasma membrane      | Adhesion molecule                       | Immune response                                                              | SP,Ig_LIKE,IG,TM         | Yes                      |
| SLC29A1     | 2030    | equilibrative nucleoside transporter 1 isoform 5                                      | NP_001291391.1    | 5          | 1                 | 1          | 2      | 0.83                                                     | 0.85                                                     |                                                                                        |                                                                                        |                                                                                               |                                                                                               | 1                                                                              | 1                                                                              | 3724    | 2030           | solute carrier family 29 (nucleoside transporters), member 1              | Auxiliary transport protein activity     | Plasma membrane      | Membrane transport protein              | Transport                                                                    | TM                       | Yes                      |
| PLXNA1      | 5361    | plexin-A1 precursor                                                                   | NP_115618.3       | 1          | 2                 | 2          | 4      | 0.83                                                     | 0.84                                                     | 4.81                                                                                   | 30.33                                                                                  | 5.6                                                                                           | 37.2                                                                                          | 2                                                                              | 2                                                                              | 11868   | 5361           | plexin A1                                                                 | Receptor activity                        | Plasma membrane      | Cell surface receptor                   | Cell communication;Signal transduction                                       | SEMA,PSI,PT              | No                       |
| RABGGTA     | 5875    | geranylgeranyl transferase type-2 subunit alpha                                       | NP_878256.1       | 1          | 11                | 11         | 32     | 0.83                                                     | 0.84                                                     | 5.82                                                                                   | 5.53                                                                                   | 19.5                                                                                          | 18.7                                                                                          | 16                                                                             | 16                                                                             | 3547    | 5875           | Rab geranylgeranyltransferase, alpha subunit                              | Transferase activity                     | Cytoplasm            | Enzyme: Prenyltransferase               | Protein modification                                                         | LRR                      | Yes                      |
| NDUFB11     | 54539   | NADH dehydrogenase [ubiquinone] 1 beta subcomplex subunit 11, mitochondrial isoform 1 | NP_061929.2       | 2          | 2                 | 2          | 6      | 0.83                                                     | 0.83                                                     | 3.95                                                                                   | 21.02                                                                                  | 5.7                                                                                           | 31                                                                                            | 3                                                                              | 3                                                                              | 2323    | 54539          | NADH dehydrogenase (ubiquinone) 1 beta subcomplex, 11, 17.3kDa            | Oxidoreductase activity                  | -                    | Enzyme: Oxidoreductase                  | Metabolism;Energy pathways                                                   | TM,PEST                  | Yes                      |
| LAGE3       | 8270    | EKC/KEOPS complex subunit LAGE3                                                       | NP_006005.2       | 1          | 2                 | 2          | 3      | 0.83                                                     | 0.82                                                     |                                                                                        |                                                                                        |                                                                                               |                                                                                               | 1                                                                              | 1                                                                              | 2087    | 8270           | None                                                                      | Molecular function unknown               | -                    | Unclassified                            | Biological process unknown                                                   | -                        | Yes                      |
| MYO6        | 4646    | unconventional myosin-VI isoform 2                                                    | NP_001287828.1    | 2          | 23                | 23         | 52     | 0.83                                                     | 0.81                                                     | 4.68                                                                                   | 5.47                                                                                   | 22.1                                                                                          | 25.3                                                                                          | 32                                                                             | 32                                                                             | 2985    | 4646           | myosin VI                                                                 | Motor activity                           | Golgi apparatus      | Motor protein                           | Cell growth and/or maintenance                                               | MYOSIN,JC,CC             | Yes                      |
| DGKH        | 160851  | diacylglycerol kinase eta isoform 2                                                   | NP_821077.1       | 5          | 2                 | 2          | 3      | 0.83                                                     | 0.81                                                     | 4.56                                                                                   | 10.42                                                                                  | 5.3                                                                                           | 11.9                                                                                          | 2                                                                              | 2                                                                              | 7237    | 160851         | diacylglycerol kinase, eta                                                | Lipid kinase activity                    | Cytoplasm            | Lipid Kinase                            | Signal transduction                                                          | PHCI,DAKGC,SAM,DAGKA     | Yes                      |
| WDR66       | 144406  | WD repeat-containing protein 66 isoform 1                                             | NP_653269.3       | 2          | 2                 | 2          | 4      | 0.83                                                     | 0.79                                                     | 40.47                                                                                  | 13.68                                                                                  | 50.3                                                                                          | 15.4                                                                                          | 2                                                                              | 2                                                                              | 14570   | 144406         | WD repeat domain 66                                                       | Molecular function unknown               | -                    | Unclassified                            | Biological process unknown                                                   | WD40                     | No                       |
| STK3        | 6788    | serine/threonine-protein kinase 3 isoform 2                                           | NP_001243241.1    | 3          | 5                 | 7          | 15     | 0.83                                                     | 0.76                                                     | 10.29                                                                                  | 8.8                                                                                    | 21.2                                                                                          | 16.6                                                                                          | 6                                                                              | 6                                                                              | 5433    | 6788           | serine/threonine kinase 3 (STE20 homolog, yeast)                          | Protein serine/threonine kinase activity | Cytoplasm            | Serine/threonine kinase                 | Cell communication;Signal transduction                                       | S,T_kinase;CC            | Yes                      |
| AASS        | 10157   | alpha-aminoadipic semialdehyde synthase, mitochondrial                                | NP_005754.2       | 1          | 7                 | 7          | 13     | 0.83                                                     | 0.75                                                     | 4.91                                                                                   | 13.87                                                                                  | 10                                                                                            | 25.8                                                                                          | 6                                                                              | 6                                                                              | 5489    | 10157          | aminoadipate-semialdehyde synthase                                        | Oxidoreductase activity                  | Mitochondrion        | Enzyme: Oxidoreductase;Enzyme: Synthase | Metabolism;Energy pathways                                                   | -                        | Yes                      |
| SEC14L2     | 23541   | SEC14-like protein 2 isoform 1                                                        | NP_036561.1       | 7          | 13                | 13         | 39     | 0.83                                                     | 0.74                                                     | 8.44                                                                                   | 11.16                                                                                  | 31.1                                                                                          | 37.3                                                                                          | 19                                                                             | 19                                                                             | 6344    | 23541          | SEC14-like 2 (S. cerevisiae)                                              | Transcription regulator activity         | Cytoplasm            | Transcription regulatory protein        | Regulation of nucleobase, nucleoside, nucleotide and nucleic acid metabolism | SEC14                    | Yes                      |
| MAPKAPK2    | 9261    | MAP kinase-activated protein kinase 2 isoform 2                                       | NP_116584.2       | 4          | 1                 | 2          | 3      | 0.83                                                     | 0.73                                                     |                                                                                        |                                                                                        |                                                                                               |                                                                                               | 1                                                                              | 1                                                                              | 11882   | 9261           | mitogen-activated protein kinase-activated protein kinase 2               | Protein serine/threonine kinase activity | Nucleus              | Serine/threonine kinase                 | Cell communication;Signal transduction                                       | S,T_kinase;NLS;CC;NES    | Yes                      |
| NAA25       | 80018   | N-alpha-acetyltransferase 25, NalB auxiliary subunit                                  | NP_079229.2       | 1          | 3                 | 3          | 5      | 0.83                                                     | 0.71                                                     | 15.97                                                                                  | 2.25                                                                                   | 23.3                                                                                          | 2.8                                                                                           | 3                                                                              | 3                                                                              | 8578    | 80018          | None                                                                      | Molecular function unknown               | -                    | Unclassified                            | Biological process unknown                                                   | -                        | No                       |
| H1FX        | 8971    | histone H1x                                                                           | NP_006017.1       | 1          | 6                 | 6          | 22     | 0.83                                                     | 0.68                                                     | 11.87                                                                                  | 9.1                                                                                    | 30.2                                                                                          | 18.8                                                                                          | 9                                                                              | 9                                                                              | 4151    | 8971           | H1 histone family, member X                                               | DNA binding                              | Nucleus              | DNA binding protein                     | Regulation of nucleobase, nucleoside, nucleotide and nucleic acid metabolism | H1S                      | Yes                      |
| VAMP4       | 8674    | vesicle-associated membrane protein 4 isoform 1                                       | NP_003753.2       | 2          | 1                 | 1          | 1      | 0.83                                                     | 0.65                                                     |                                                                                        |                                                                                        |                                                                                               |                                                                                               | 1                                                                              | 1                                                                              | 6070    | 8674           | vesicle-associated membrane protein 4                                     | Auxiliary transport protein activity     | Golgi apparatus      | Membrane transport protein              | Protein transport                                                            | CC;TM                    | Yes                      |
| CCNA2       | 890     | cyclin A2                                                                             | NP_001228.1       | 1          | 1                 | 1          | 1      | 0.83                                                     | 0.56                                                     |                                                                                        |                                                                                        |                                                                                               |                                                                                               | 1                                                                              | 1                                                                              | 453     | 890            | cyclin A2                                                                 | Kinase binding                           | Nucleus              | Cell cycle control protein              | Cell communication;Signal transduction                                       | CYCLIN_N,CYC LIN_C       | Yes                      |
| GGA2        | 23062   | ADP-ribosylation factor-binding protein GGA2                                          | NP_055859.1       | 4          | 1                 | 2          | 3      | 0.83                                                     | 0.55                                                     |                                                                                        |                                                                                        |                                                                                               |                                                                                               | 1                                                                              | 1                                                                              | 9347    | 23062          | golgi associated, gamma adaptin ear containing,ARF binding protein 2      | Transporter activity                     | Golgi apparatus      | Transport/cargo protein                 | Transport                                                                    | SP,VHS,CC                | Yes                      |

Supplementary Table S1. List of quantified proteins in OKF6/TERT1-Smoke cells

Raignonpalan *et al.*, 2017. Role of protein kinase N2 (PKN2) in cigarette smoke-mediated oncogenic transformation of oral cells

| Gene Symbol | Gene ID | Protein Description                                         | Protein Accession | # Proteins | # Unique Peptides | # Peptides | # PSMs | OKF6/TERT1-Smoke/<br>OKF6/TERT1-Parental<br>(130/126) R1 | OKF6/TERT1-Smoke/<br>OKF6/TERT1-Parental<br>(128/127) R2 | Ratio Standard Errors [%]:<br>OKF6/TERT1-Smoke/<br>OKF6/TERT1-Parental<br>(130/126) R1 | Ratio Standard Errors [%]:<br>OKF6/TERT1-Smoke/<br>OKF6/TERT1-Parental<br>(128/127) R2 | Ratio Variabilities [%]:<br>F13: OKF6/TERT1-<br>Smoke/<br>OKF6/TERT1-Parental<br>(130/126) R1 | Ratio Variabilities [%]:<br>F13: OKF6/TERT1-<br>Smoke/<br>OKF6/TERT1-Parental<br>(128/127) R2 | Ratio Counts: F13:<br>OKF6/TERT1-Smoke/<br>OKF6/TERT1-Parental<br>(130/126) R1 | Ratio Counts: F13:<br>OKF6/TERT1-Smoke/<br>OKF6/TERT1-Parental<br>(128/127) R2 | HPRD ID | Entrez Gene Id | Gene Name                                                                                                              | Molecular Function                                        | Primary Localization  | Molecular Class                                     | Biological Process                                                                                                    | Domains              | Plasma Proteome Database |
|-------------|---------|-------------------------------------------------------------|-------------------|------------|-------------------|------------|--------|----------------------------------------------------------|----------------------------------------------------------|----------------------------------------------------------------------------------------|----------------------------------------------------------------------------------------|-----------------------------------------------------------------------------------------------|-----------------------------------------------------------------------------------------------|--------------------------------------------------------------------------------|--------------------------------------------------------------------------------|---------|----------------|------------------------------------------------------------------------------------------------------------------------|-----------------------------------------------------------|-----------------------|-----------------------------------------------------|-----------------------------------------------------------------------------------------------------------------------|----------------------|--------------------------|
| RSRC2       | 65117   | arginine-serine-rich coiled-coil protein 2                  | NP_075388.2       | 1          | 2                 | 2          | 3      | 0.82                                                     | 1.97                                                     | 42.5                                                                                   | 24.85                                                                                  | 52.6                                                                                          | 78.6                                                                                          | 2                                                                              | 2                                                                              | 13342   | 65117          | None                                                                                                                   | Molecular function unknown; Transcription factor activity | Nucleus               | Unclassified                                        | Biological process unknown; Cell proliferation                                                                        | CC                   | No                       |
| MARS2       | 92935   | methionine-tRNA ligase, mitochondrial precursor             | NP_612404.1       | 1          | 1                 | 1          | 2      | 0.82                                                     | 1.86                                                     |                                                                                        |                                                                                        |                                                                                               |                                                                                               | 1                                                                              | 1                                                                              | 14363   | 92935          | methionine-tRNA synthetase 2 (mitochondrial)                                                                           | Ligase activity                                           | -                     | Enzyme: Synthase                                    | Metabolism; Energy pathways                                                                                           | SP                   | No                       |
| SORBS3      | 10174   | vinexin isoform 1                                           | NP_005766.3       | 2          | 1                 | 1          | 1      | 0.82                                                     | 1.6                                                      |                                                                                        |                                                                                        |                                                                                               |                                                                                               | 1                                                                              | 1                                                                              | 11535   | 10174          | None                                                                                                                   | Cell adhesion molecule activity                           | Cytoplasm             | Adhesion molecule                                   | Cell growth and/or maintenance; Cytoskeleton organization and biogenesis                                              | SH3;SORB             | Yes                      |
| BCAS2       | 10286   | pre-mRNA-splicing factor SPF27                              | NP_005863.1       | 1          | 1                 | 1          | 1      | 0.82                                                     | 1.54                                                     |                                                                                        |                                                                                        |                                                                                               |                                                                                               | 1                                                                              | 1                                                                              | 5777    | 10286          | breast carcinoma amplified sequence 2                                                                                  | Pre-mRNA splicing factor activity                         | Nucleus               | Cell cycle control protein                          | Cell communication; Signal transduction; Regulation of nucleobase, nucleoside, nucleotide and nucleic acid metabolism | CC                   | No                       |
| HERC2       | 8924    | E3 ubiquitin-protein ligase HERC2                           | NP_004658.3       | 2          | 1                 | 2          | 3      | 0.82                                                     | 1.38                                                     |                                                                                        |                                                                                        |                                                                                               |                                                                                               | 1                                                                              | 1                                                                              | 6905    | 8924           | hect domain and RLD 2                                                                                                  | Ubiquitin-specific protease activity                      | -                     | Ubiquitin proteasome system protein                 | Protein metabolism                                                                                                    | CC;ZnF_ZZ;HECT       | No                       |
| ASUN        | 55726   | protein asunder homolog                                     | NP_060634.2       | 1          | 1                 | 1          | 1      | 0.82                                                     | 1.37                                                     |                                                                                        |                                                                                        |                                                                                               |                                                                                               | 1                                                                              | 1                                                                              |         |                |                                                                                                                        |                                                           |                       |                                                     |                                                                                                                       |                      |                          |
| MBLAC2      | 153364  | metallo-beta-lactamase domain-containing protein 2          | NP_981951.1       | 1          | 2                 | 2          | 7      | 0.82                                                     | 1.11                                                     | 5.33                                                                                   | 18.9                                                                                   | 7.6                                                                                           | 37.6                                                                                          | 3                                                                              | 3                                                                              | 14099   | 153364         | None                                                                                                                   | Molecular function unknown                                | -                     | Unclassified                                        | Biological process unknown                                                                                            | -                    | No                       |
| TDRKH       | 11022   | tudor and KH domain-containing protein isoform a            | NP_006853.2       | 2          | 2                 | 2          | 5      | 0.82                                                     | 1.03                                                     | 0.63                                                                                   | 0.62                                                                                   | 0.7                                                                                           | 0.9                                                                                           | 2                                                                              | 2                                                                              | 15485   | 11022          | tudor and KH domain containing                                                                                         | RNA binding                                               | -                     | RNA binding protein                                 | Regulation of nucleobase, nucleoside, nucleotide and nucleic acid metabolism                                          | TM;KH;TUDOR          | Yes                      |
| EXOSC6      | 118460  | exosome complex component MTR3                              | NP_478126.1       | 1          | 4                 | 4          | 9      | 0.82                                                     | 1.02                                                     | 6.07                                                                                   | 8.14                                                                                   | 10                                                                                            | 16.8                                                                                          | 4                                                                              | 4                                                                              | 12107   | 118460         | exosome component 6                                                                                                    | Ribonuclease activity                                     | Nucleus               | Ribonuclease                                        | Regulation of nucleobase, nucleoside, nucleotide and nucleic acid metabolism                                          | -                    | No                       |
| CTSB        | 1508    | cathepsin B preproprotein                                   | NP_001899.1       | 1          | 7                 | 7          | 24     | 0.82                                                     | 1                                                        | 7.26                                                                                   | 11.66                                                                                  | 21.8                                                                                          | 43.8                                                                                          | 13                                                                             | 13                                                                             | 287     | 1508           | cathepsin B                                                                                                            | Cysteine-type peptidase activity                          | Lysosome              | Cysteine protease                                   | Protein metabolism; Apoptosis                                                                                         | PPTC1;SP             | Yes                      |
| TRIM22      | 10346   | E3 ubiquitin-protein ligase TRIM22 isoform 1                | NP_006065.2       | 2          | 4                 | 4          | 8      | 0.82                                                     | 1                                                        | 23.2                                                                                   | 3.43                                                                                   | 39.7                                                                                          | 6.9                                                                                           | 4                                                                              | 4                                                                              | 5951    | 10346          | tripartite motif-containing 22                                                                                         | Transcription regulator activity                          | Cytoplasm             | Transcription regulatory protein                    | Regulation of nucleobase, nucleoside, nucleotide and nucleic acid metabolism                                          | RNG;BBOX;PRY;CC;SPRY | Yes                      |
| COG2        | 22796   | conserved oligomeric Golgi complex subunit 2 isoform 1      | NP_031383.1       | 2          | 5                 | 5          | 13     | 0.82                                                     | 0.99                                                     | 8.16                                                                                   | 13.47                                                                                  | 15.1                                                                                          | 33.7                                                                                          | 5                                                                              | 6                                                                              | 7372    | 22796          | component of oligomeric golgi complex 2                                                                                | Structural molecule activity                              | Golgi apparatus       | Structural protein                                  | Transport                                                                                                             | CC                   | Yes                      |
| RAB18       | 22931   | ras-related protein Rab-18 isoform 1                        | NP_067075.1       | 5          | 7                 | 7          | 24     | 0.82                                                     | 0.98                                                     | 4.61                                                                                   | 6.59                                                                                   | 13.2                                                                                          | 22.6                                                                                          | 12                                                                             | 12                                                                             | 3731    | 22931          | RAB18, member RAS oncogene family                                                                                      | GTPase activity                                           | Plasma membrane       | GTPase                                              | Cell communication; Signal transduction                                                                               | RAB                  | Yes                      |
| C19orf70    | 125988  | protein QIL1 isoform 1                                      | NP_001295169.1    | 2          | 2                 | 2          | 6      | 0.82                                                     | 0.98                                                     | 38.65                                                                                  | 10.72                                                                                  | 58.9                                                                                          | 18.3                                                                                          | 3                                                                              | 3                                                                              | 15198   | 125988         | None                                                                                                                   | Molecular function unknown                                | -                     | Unclassified                                        | Biological process unknown                                                                                            | -                    | No                       |
| NSDHL       | 50814   | sterol-4-alpha-carboxylate 3-dehydrogenase, decarboxylating | NP_001123237.1    | 1          | 10                | 10         | 22     | 0.82                                                     | 0.98                                                     | 8.97                                                                                   | 4.03                                                                                   | 25.9                                                                                          | 13.8                                                                                          | 12                                                                             | 12                                                                             | 2229    | 50814          | NAD(P) dependent steroid dehydrogenase-like                                                                            | Catalytic activity                                        | Endoplasmic reticulum | Enzyme: Dehydrogenase                               | Metabolism; Energy pathways                                                                                           | TM                   | Yes                      |
| RAB4A       | 5867    | ras-related protein Rab-4A isoform 1                        | NP_004569.2       | 11         | 3                 | 5          | 41     | 0.82                                                     | 0.97                                                     | 10.93                                                                                  | 2.13                                                                                   | 15.7                                                                                          | 3.6                                                                                           | 3                                                                              | 3                                                                              | 1541    | 5867           | RAB4A, member RAS oncogene family                                                                                      | GTPase activity                                           | Endosome              | GTPase                                              | Cell communication; Signal transduction                                                                               | RAB                  | Yes                      |
| BAG3        | 9531    | BAG family molecular chaperone regulator 3                  | NP_004272.2       | 1          | 3                 | 3          | 5      | 0.82                                                     | 0.96                                                     | 2.78                                                                                   | 10.53                                                                                  | 3.2                                                                                           | 14.4                                                                                          | 2                                                                              | 2                                                                              | 4860    | 9531           | BCL2-associated athanogene 3                                                                                           | Receptor signaling complex scaffold activity              | Cytoplasm             | Adapter molecule                                    | Apoptosis                                                                                                             | WW;BAG;CC            | Yes                      |
| AKR1C1      | 1645    | aldo-keto reductase family 1 member C1                      | NP_001344.2       | 4          | 1                 | 15         | 58     | 0.82                                                     | 0.94                                                     |                                                                                        |                                                                                        |                                                                                               |                                                                                               | 1                                                                              | 1                                                                              | 7194    | 1645           | aldo-keto reductase family 1, member C1 (dihydrodiol dehydrogenase 1; 20-alpha (3-alpha)-hydroxysteroid dehydrogenase) | Catalytic activity                                        | Cytoplasm             | Enzyme: Reductase                                   | Metabolism; Energy pathways                                                                                           | ALDKR                | Yes                      |
| CYB5R3      | 1727    | NADH-cytochrome b5 reductase 3 isoform 3                    | NP_001165131.1    | 3          | 10                | 10         | 51     | 0.82                                                     | 0.92                                                     | 8.39                                                                                   | 8.3                                                                                    | 36.9                                                                                          | 41.4                                                                                          | 27                                                                             | 27                                                                             | 8942    | 1727           | dihydropyridine (NADH) (cytochrome b-5 reductase)                                                                      | Catalytic activity                                        | Cytoplasm             | Enzyme: Reductase                                   | Metabolism; Energy pathways                                                                                           | -                    | Yes                      |
| NEK9        | 91754   | serine/threonine-protein kinase Nek9                        | NP_149107.4       | 1          | 8                 | 8          | 20     | 0.82                                                     | 0.92                                                     | 5.94                                                                                   | 6.7                                                                                    | 16.2                                                                                          | 20.7                                                                                          | 11                                                                             | 11                                                                             | 11386   | 91754          | NIMA (never in mitosis gene a)-related kinase 9                                                                        | Kinase activity                                           | Cytoplasm             | Serine/threonine kinase; Cell cycle control protein | Cell growth and/or maintenance                                                                                        | NLS;CC               | Yes                      |
| LPCAT4      | 254531  | lysophospholipid acyltransferase LPCAT4                     | NP_705841.2       | 1          | 4                 | 4          | 13     | 0.82                                                     | 0.92                                                     | 10.88                                                                                  | 15.24                                                                                  | 20.1                                                                                          | 32.1                                                                                          | 5                                                                              | 5                                                                              | 8315    | 254531         | None                                                                                                                   | Acyltransferase activity                                  | Endoplasmic reticulum | Enzyme: Acyltransferase                             | Metabolism; Energy pathways                                                                                           | TM;PISC              | No                       |
| TMEM109     | 79073   | transmembrane protein 109 precursor                         | NP_076997.1       | 1          | 3                 | 3          | 7      | 0.82                                                     | 0.92                                                     | 16.14                                                                                  | 3.52                                                                                   | 27                                                                                            | 6.5                                                                                           | 4                                                                              | 4                                                                              | 14687   | 79073          | None                                                                                                                   | Molecular function unknown                                | -                     | Unclassified                                        | Biological process unknown                                                                                            | SP;TM;CC             | No                       |
| CLEC14A     | 161198  | C-type lectin domain family 14 member A precursor           | NP_778230.1       | 1          | 1                 | 1          | 1      | 0.82                                                     | 0.89                                                     |                                                                                        |                                                                                        |                                                                                               |                                                                                               | 1                                                                              | 1                                                                              | 10711   | 161198         | C-type lectin domain family 14, member A                                                                               | Molecular function unknown                                | -                     | Unclassified                                        | Biological process unknown                                                                                            | LECTIN_C;SP;TM       | Yes                      |
| OSBP3       | 26031   | oxysterol-binding protein-related protein 3 isoform a       | NP_056365.1       | 4          | 13                | 14         | 25     | 0.82                                                     | 0.89                                                     | 10.81                                                                                  | 10.2                                                                                   | 34.3                                                                                          | 34.9                                                                                          | 14                                                                             | 14                                                                             | 9474    | 26031          | oxysterol binding protein-like 3                                                                                       | Endoplasmic reticulum membrane                            | Unclassified          | Steroid metabolism                                  | PH;CC                                                                                                                 | Yes                  |                          |
| PGRMC2      | 10424   | membrane-associated progesterone receptor component 2       | NP_006311.2       | 1          | 3                 | 3          | 9      | 0.82                                                     | 0.89                                                     | 26.06                                                                                  | 13.33                                                                                  | 38.2                                                                                          | 20.7                                                                                          | 3                                                                              | 3                                                                              | 9665    | 10424          | progesterone receptor membrane component 2                                                                             | Steroid hormone receptor activity                         | Plasma membrane       | Integral membrane protein                           | Cell communication; Signal transduction                                                                               | TM                   | No                       |

Supplementary Table S1. List of quantified proteins in OKF6/TERT1-Smoke cells  
 Raingonalan *et al.*, 2017. Role of protein kinase N2 (PKN2) in cigarette smoke-mediated oncogenic transformation of oral cells

| Gene Symbol | Gene ID | Protein Description                                                   | Protein Accession | # Proteins | # Unique Peptides | # Peptides | # PSMs | OKF6/TERT1-Smoke/<br>OKF6/TERT1-Parental<br>(130/126) R1 | OKF6/TERT1-Smoke/<br>OKF6/TERT1-Parental<br>(128/127) R2 | Ratio Standard Errors [%]:<br>OKF6/TERT1-Smoke/<br>OKF6/TERT1-Parental<br>(130/126) R1 | Ratio Standard Errors [%]:<br>OKF6/TERT1-Smoke/<br>OKF6/TERT1-Parental<br>(128/127) R2 | Ratio Variabilities [%]:<br>F13: OKF6/TERT1-<br>Smoke/<br>OKF6/TERT1-Parental<br>(130/126) R1 | Ratio Variabilities [%]:<br>F13: OKF6/TERT1-<br>Smoke/<br>OKF6/TERT1-Parental<br>(128/127) R2 | Ratio Counts: F13:<br>OKF6/TERT1-Smoke/<br>OKF6/TERT1-Parental<br>(130/126) R1 | Ratio Counts: F13:<br>OKF6/TERT1-Smoke/<br>OKF6/TERT1-Parental<br>(128/127) R2 | HPRD<br>ID | Entrez<br>Gene Id | Gene Name                                                           | Molecular<br>Function                  | Primary<br>Localization | Molecular Class                 | Biological<br>Process                                                        | Domains                 | Plasma<br>Proteome<br>Database |
|-------------|---------|-----------------------------------------------------------------------|-------------------|------------|-------------------|------------|--------|----------------------------------------------------------|----------------------------------------------------------|----------------------------------------------------------------------------------------|----------------------------------------------------------------------------------------|-----------------------------------------------------------------------------------------------|-----------------------------------------------------------------------------------------------|--------------------------------------------------------------------------------|--------------------------------------------------------------------------------|------------|-------------------|---------------------------------------------------------------------|----------------------------------------|-------------------------|---------------------------------|------------------------------------------------------------------------------|-------------------------|--------------------------------|
| CSPG4       | 1464    | chondroitin sulfate proteoglycan 4 precursor                          | NP_001888.2       | 1          | 3                 | 3          | 4      | 0.82                                                     | 0.88                                                     | 1.39                                                                                   | 24.99                                                                                  | 1.6                                                                                           | 31.8                                                                                          | 2                                                                              | 2                                                                              | 3105       | 1464              | chondroitin sulfate proteoglycan-4 (melanoma-associated)            | Protein binding                        | Plasma membrane         | Integral membrane protein       | Cell communication; Signal transduction                                      | SP;TM;LAMG              | No                             |
| ACO2        | 50      | aconitate hydratase, mitochondrial precursor                          | NP_001089.1       | 1          | 26                | 26         | 129    | 0.82                                                     | 0.88                                                     | 4.15                                                                                   | 5.15                                                                                   | 27.4                                                                                          | 37.2                                                                                          | 62                                                                             | 63                                                                             | 12         | 50                | aconitase 2, mitochondrial                                          | Catalytic activity                     | Mitochondrion           | Enzyme: Hydratase               | Metabolism;Energy pathways                                                   | -                       | Yes                            |
| LRBA        | 987     | lipopolysaccharide-responsive and beige-like anchor protein isoform 1 | NP_001186211.2    | 4          | 17                | 21         | 45     | 0.82                                                     | 0.86                                                     | 3.5                                                                                    | 4.55                                                                                   | 12.9                                                                                          | 17.5                                                                                          | 20                                                                             | 20                                                                             | 7344       | 987               | LPS-responsive vesicle trafficking, beach anchor containing         | Cytoskeletal anchoring activity        | Golgi apparatus         | Anchor protein                  | Cell communication; Signal transduction                                      | WD40                    | Yes                            |
| ARPC4       | 10093   | actin-related protein 2/3 complex subunit 4 isoform c                 | NP_001185709.1    | 4          | 7                 | 7          | 24     | 0.82                                                     | 0.85                                                     | 5.81                                                                                   | 7.23                                                                                   | 18.6                                                                                          | 24.2                                                                                          | 15                                                                             | 15                                                                             | 10368      | 10093             | actin related protein 2/3 complex, subunit 4, 20kDa                 | Cytoskeletal protein binding           | Cytoskeleton            | Cytoskeletal associated protein | Cell growth and/or maintenance                                               | -                       | Yes                            |
| CAPZB       | 832     | F-actin-capping protein subunit beta isoform 4                        | NP_001269091.1    | 4          | 12                | 12         | 47     | 0.82                                                     | 0.84                                                     | 3.52                                                                                   | 2.93                                                                                   | 14.1                                                                                          | 12.1                                                                                          | 24                                                                             | 24                                                                             | 11872      | 832               | capping protein (actin filament) muscle Z-line/beta                 | Structural constituent of cytoskeleton | Cytoskeleton            | Cytoskeletal protein            | Cell growth and/or maintenance                                               | -                       | Yes                            |
| RAB35       | 11021   | ras-related protein Rab-35 isoform 1                                  | NP_006852.1       | 13         | 5                 | 7          | 88     | 0.82                                                     | 0.84                                                     | 3.97                                                                                   | 7.43                                                                                   | 8.7                                                                                           | 16.5                                                                                          | 7                                                                              | 7                                                                              | 5010       | 11021             | RAB35, member RAS oncogene family                                   | GTPase activity                        | -                       | GTPase                          | Cell communication; Signal transduction                                      | RAB                     | Yes                            |
| NME3        | 4832    | nucleoside diphosphate kinase 3 precursor                             | NP_002504.2       | 1          | 1                 | 1          | 2      | 0.82                                                     | 0.83                                                     |                                                                                        |                                                                                        |                                                                                               |                                                                                               | 1                                                                              | 1                                                                              | 3488       | 4832              | non-metastatic cells 3, protein expressed in                        | Catalytic activity                     | Mitochondrion           | Enzyme: Phosphotransferase      | Metabolism;Energy pathways                                                   | SP;NDK                  | Yes                            |
| ATP1A1      | 476     | sodium/potassium-transporting ATPase subunit alpha-1 isoform a        | NP_000692.2       | 11         | 43                | 43         | 209    | 0.82                                                     | 0.83                                                     | 3.65                                                                                   | 4.79                                                                                   | 32.3                                                                                          | 43.2                                                                                          | 111                                                                            | 108                                                                            | 1662       | 476               | ATPase, Na+/K+ transporting, alpha 1 polypeptide                    | ATPase activity                        | Plasma membrane         | ATPase                          | Transport                                                                    | TM                      | Yes                            |
| SLC16A3     | 9123    | monocarboxylate transporter 4                                         | NP_004198.1       | 1          | 5                 | 5          | 16     | 0.82                                                     | 0.82                                                     | 5.05                                                                                   | 2.78                                                                                   | 12.5                                                                                          | 6.8                                                                                           | 9                                                                              | 9                                                                              | 4854       | 9123              | solute carrier family 16 (monocarboxylate transporters), member 3   | Auxiliary transport protein activity   | Plasma membrane         | Membrane transport protein      | Transport                                                                    | TM                      | Yes                            |
| APOBEC3C    | 27350   | DNA dC→dU-editing enzyme APOBEC-3C                                    | NP_055323.2       | 2          | 2                 | 3          | 6      | 0.82                                                     | 0.82                                                     | 1.71                                                                                   | 20.23                                                                                  | 2                                                                                             | 23.9                                                                                          | 2                                                                              | 2                                                                              | 9671       | 27350             | apolipoprotein B mRNA editing enzyme, catalytic polypeptide-like 3C | Deaminase activity                     | -                       | Enzyme: Deaminase               | Metabolism;Energy pathways                                                   | -                       | No                             |
| MSN         | 4478    | moesin                                                                | NP_002435.1       | 1          | 37                | 48         | 319    | 0.82                                                     | 0.81                                                     | 4.72                                                                                   | 10.4                                                                                   | 44                                                                                            | 110.1                                                                                         | 118                                                                            | 113                                                                            | 2399       | 4478              | moesin                                                              | Structural constituent of cytoskeleton | Cytoplasm               | Cytoskeletal protein            | Cell growth and/or maintenance                                               | B4;ERM;CC               | Yes                            |
| DHRS4       | 10901   | dehydrogenase/reductase SDR family member 4 isoform 1                 | NP_066284.2       | 3          | 2                 | 2          | 4      | 0.82                                                     | 0.81                                                     | 4.98                                                                                   | 32.02                                                                                  | 5.8                                                                                           | 38.1                                                                                          | 2                                                                              | 2                                                                              | 7484       | 10901             | dehydrogenase/reductase (SDR family) member 4                       | Catalytic activity                     | Peroxisome              | Enzyme: Dehydrogenase           | Metabolism;Energy pathways                                                   | -                       | No                             |
| H6PD        | 9563    | GDH6PGL endoplasmic bifunctional protein isoform 1 precursor          | NP_001269516.1    | 2          | 6                 | 6          | 8      | 0.82                                                     | 0.8                                                      | 17                                                                                     | 12.6                                                                                   | 35.1                                                                                          | 25.1                                                                                          | 6                                                                              | 6                                                                              | 681        | 9563              | hexose-6-phosphate dehydrogenase (glucose 1--dehydrogenase)         | Catalytic activity                     | Endoplasmic reticulum   | Enzyme: Dehydrogenase           | Metabolism;Energy pathways                                                   | SP                      | Yes                            |
| ACAD11      | 84129   | acyl-CoA dehydrogenase family member 11                               | NP_115545.3       | 1          | 2                 | 2          | 2      | 0.82                                                     | 0.79                                                     | 3.19                                                                                   | 6.17                                                                                   | 3.7                                                                                           | 6.9                                                                                           | 2                                                                              | 2                                                                              | 13352      | 84129             | None                                                                | Catalytic activity                     | Peroxisome              | Enzyme: Dehydrogenase           | Metabolism;Energy pathways                                                   | -                       | No                             |
| MTIF2       | 4528    | translation initiation factor IF-2, mitochondrial precursor           | NP_002444.2       | 1          | 5                 | 5          | 10     | 0.82                                                     | 0.79                                                     | 8.95                                                                                   | 17.77                                                                                  | 18                                                                                            | 35.5                                                                                          | 6                                                                              | 6                                                                              | 4792       | 4528              | mitochondrial translational initiation factor 2                     | Translation regulator activity         | Mitochondrion           | Translation regulatory protein  | Protein metabolism                                                           | GTP_EFTU;GTP_EFTU_D2;CC | Yes                            |
| PI4K2A      | 55361   | phosphatidylinositol 4-kinase type 2-alpha                            | NP_060895.1       | 2          | 14                | 15         | 21     | 0.82                                                     | 0.79                                                     | 6.28                                                                                   | 3.11                                                                                   | 19.5                                                                                          | 9.2                                                                                           | 14                                                                             | 14                                                                             | 11431      | 55361             | None                                                                | Lipid kinase activity                  | Golgi apparatus         | Lipid Kinase                    | Cell communication; Signal transduction                                      | PI3KC                   | Yes                            |
| ATP5I       | 521     | ATP synthase subunit e, mitochondrial                                 | NP_009031.1       | 1          | 2                 | 2          | 7      | 0.82                                                     | 0.77                                                     | 3.66                                                                                   | 37.46                                                                                  | 6                                                                                             | 63.2                                                                                          | 4                                                                              | 4                                                                              | 3308       | 521               | ATP synthase, H+ transporting, mitochondrial F1complex, subunit e   | Transporter activity                   | Mitochondrion           | Transport/cargo protein         | Metabolism;Energy pathways                                                   | CC                      | Yes                            |
| SYPL1       | 6856    | synaptophysin-like protein 1 isoform a                                | NP_006745.1       | 2          | 3                 | 3          | 8      | 0.82                                                     | 0.73                                                     | 7.58                                                                                   | 7.21                                                                                   | 15.3                                                                                          | 12.9                                                                                          | 6                                                                              | 6                                                                              | 15459      | 6856              | synaptophysin-like 1                                                | Transporter activity                   | Cytoplasmic vesicle     | Integral membrane protein       | Transport                                                                    | TM                      | No                             |
| TSC1        | 7248    | hamartin isoform 1                                                    | NP_000359.1       | 3          | 1                 | 1          | 2      | 0.82                                                     | 0.73                                                     |                                                                                        |                                                                                        |                                                                                               |                                                                                               | 1                                                                              | 1                                                                              | 5594       | 7248              | tuberous sclerosis 1                                                | Protein binding                        | Cytoplasm               | Cytoskeletal associated protein | Regulation of cell growth                                                    | CC                      | Yes                            |
| HP1BP3      | 50809   | heterochromatin protein 1-binding protein 3                           | NP_057371.2       | 1          | 15                | 15         | 35     | 0.82                                                     | 0.73                                                     | 4.95                                                                                   | 8.22                                                                                   | 19.2                                                                                          | 28.8                                                                                          | 22                                                                             | 22                                                                             | 11026      | 50809             | heterochromatin protein 1, binding protein 3                        | DNA binding                            | Nucleus                 | DNA binding protein             | Regulation of nucleosome, nucleoside, nucleotide and nucleic acid metabolism | H15                     | Yes                            |
| MCM3        | 4172    | DNA replication licensing factor MCM3 isoform 1                       | NP_002379.3       | 2          | 22                | 22         | 56     | 0.82                                                     | 0.73                                                     | 5.01                                                                                   | 5.31                                                                                   | 22.5                                                                                          | 21.1                                                                                          | 29                                                                             | 29                                                                             | 4072       | 4172              | MCM3 minichromosome maintenance deficient 3 (S.cerevisiae)          | DNA binding                            | Nucleus                 | DNA binding protein             | Regulation of nucleosome, nucleoside, nucleotide and nucleic acid metabolism | AAA;CC                  | Yes                            |
| C6orf120    | 387263  | UPF0669 protein C6orf120 precursor                                    | NP_001025034.1    | 1          | 1                 | 1          | 4      | 0.82                                                     | 0.7                                                      | 25.21                                                                                  | 1.81                                                                                   | 29.9                                                                                          | 1.8                                                                                           | 2                                                                              | 2                                                                              | 18800      | 387263            | Chromosome 6 open reading frame 120                                 | Molecular function unknown             | -                       | Unclassified                    | Biological process unknown                                                   | -                       | No                             |
| MPZL1       | 9019    | myelin protein zero-like protein 1 isoform a precursor                | NP_003944.1       | 3          | 4                 | 4          | 6      | 0.82                                                     | 0.7                                                      | 11.29                                                                                  | 10.77                                                                                  | 18.7                                                                                          | 15.2                                                                                          | 4                                                                              | 4                                                                              | 5086       | 9019              | myelin protein zero-like 1                                          | Binding                                | Integral to membrane    | Unclassified                    | Cell-cell signaling                                                          | SP;IGV;TM               | No                             |
| TMEM126B    | 55863   | complex I assembly factor TMEM126B, mitochondrial isoform a           | NP_060950.3       | 1          | 1                 | 1          | 2      | 0.82                                                     | 0.69                                                     |                                                                                        |                                                                                        |                                                                                               |                                                                                               | 1                                                                              | 1                                                                              | 13715      | 55863             | None                                                                | Molecular function unknown             | Integral to membrane    | Unclassified                    | Biological process unknown                                                   | TM                      | No                             |
| FZD6        | 8323    | frizzled-6 isoform a precursor                                        | NP_003497.2       | 2          | 1                 | 1          | 6      | 0.82                                                     | 0.69                                                     |                                                                                        |                                                                                        |                                                                                               |                                                                                               | 1                                                                              | 1                                                                              | 4559       | 8323              | frizzled homolog 6 (Drosophila)                                     | G-protein coupled receptor activity    | Plasma membrane         | G protein coupled receptor      | Cell communication; Signal transduction                                      | FZ;TM;SP                | Yes                            |
| DENND6A     | 201627  | protein DENND6A                                                       | NP_689891.1       | 1          | 2                 | 2          | 4      | 0.82                                                     | 0.69                                                     | 3.25                                                                                   | 2.87                                                                                   | 3.8                                                                                           | 2.8                                                                                           | 2                                                                              | 2                                                                              |            |                   |                                                                     |                                        |                         |                                 |                                                                              |                         |                                |
| GPX1        | 2876    | glutathione peroxidase 1 isoform 1                                    | NP_000572.2       | 2          | 7                 | 7          | 16     | 0.82                                                     | 0.69                                                     | 10.65                                                                                  | 26.02                                                                                  | 28.2                                                                                          | 61.3                                                                                          | 10                                                                             | 10                                                                             | 11749      | 2876              | glutathione peroxidase 1                                            | Peroxidase activity                    | Cytosol                 | Enzyme: Peroxidase              | Anti-apoptosis                                                               | -                       | Yes                            |
| LMF2        | 91289   | lipase maturation factor 2                                            | NP_149977.2       | 1          | 1                 | 1          | 2      | 0.82                                                     | 0.69                                                     |                                                                                        |                                                                                        |                                                                                               |                                                                                               | 1                                                                              | 1                                                                              | 12519      | 91289             | None                                                                | Molecular function unknown             | Integral to membrane    | Unclassified                    | Biological process unknown                                                   | TM                      | No                             |

Supplementary Table S1. List of quantified proteins in OKF6/TERT1-Smoke cells  
Rajagopal *et al.*, 2017. Role of protein kinase N2 (PKN2) in cigarette smoke-mediated oncogenic transformation of oral cells

| Gene Symbol | Gene ID | Protein Description                                                         | Protein Accession | # Proteins | # Unique Peptides | # Peptides | # PSMs | OKF6/TERT1-Smoke/<br>OKF6/TERT1-Parental<br>(130/126) R1 | OKF6/TERT1-Smoke/<br>OKF6/TERT1-Parental<br>(128/127) R2 | Ratio Standard Errors [%]:<br>OKF6/TERT1-Smoke/<br>OKF6/TERT1-Parental<br>(130/126) R1 | Ratio Standard Errors [%]:<br>OKF6/TERT1-Smoke/<br>OKF6/TERT1-Parental<br>(128/127) R2 | Ratio Variabilities [%]:<br>F13: OKF6/TERT1-<br>Smoke/<br>OKF6/TERT1-Parental<br>(130/126) R1 | Ratio Variabilities [%]:<br>F13: OKF6/TERT1-<br>Smoke/<br>OKF6/TERT1-Parental<br>(128/127) R2 | Ratio Counts: F13:<br>OKF6/TERT1-Smoke/<br>OKF6/TERT1-Parental<br>(130/126) R1 | Ratio Counts: F13:<br>OKF6/TERT1-Smoke/<br>OKF6/TERT1-Parental<br>(128/127) R2 | HPRD ID | Entrez Gene ID | Gene Name                                                                       | Molecular Function                           | Primary Localization                  | Molecular Class                  | Biological Process                                                           | Domains                          | Plasma Proteome Database |
|-------------|---------|-----------------------------------------------------------------------------|-------------------|------------|-------------------|------------|--------|----------------------------------------------------------|----------------------------------------------------------|----------------------------------------------------------------------------------------|----------------------------------------------------------------------------------------|-----------------------------------------------------------------------------------------------|-----------------------------------------------------------------------------------------------|--------------------------------------------------------------------------------|--------------------------------------------------------------------------------|---------|----------------|---------------------------------------------------------------------------------|----------------------------------------------|---------------------------------------|----------------------------------|------------------------------------------------------------------------------|----------------------------------|--------------------------|
| PLK3        | 1263    | serine/threonine-protein kinase PLK3                                        | NP_004064.2       | 1          | 1                 | 1          | 1      | 0.82                                                     | 0.68                                                     |                                                                                        |                                                                                        |                                                                                               |                                                                                               | 1                                                                              | 1                                                                              | 4222    | 1263           | polo-like kinase 3 (Drosophila)                                                 | Protein serine/threonine kinase activity     | Cytoplasm                             | Serine/threonine kinase          | Cell communication;Signal transduction                                       | S_T_kinase                       | Yes                      |
| POM121      | 9883    | nuclear envelope pore membrane protein POM 121 isoform 1                    | NP_001244119.1    | 3          | 1                 | 1          | 2      | 0.82                                                     | 0.68                                                     |                                                                                        |                                                                                        |                                                                                               |                                                                                               | 1                                                                              | 1                                                                              | 11448   | 9883           | POM121 membrane glycoprotein (rat)                                              | Structural constituent of nuclear pore       | Nucleus                               | Integral membrane protein        | Transport                                                                    | -                                | No                       |
| VAMP7       | 6845    | vesicle-associated membrane protein 7 isoform 3                             | NP_001172112.1    | 3          | 2                 | 2          | 5      | 0.82                                                     | 0.66                                                     | 30.85                                                                                  | 22.64                                                                                  | 37.1                                                                                          | 21.4                                                                                          | 2                                                                              | 2                                                                              | 2084    | 6845           | synaptobrevin-like 1                                                            | Transporter activity                         | Plasma membrane;Cell surface;Lysosome | Transport/cargo protein          | Transport                                                                    | TM;SP                            | No                       |
| VPS36       | 51028   | vacuolar protein-sorting-associated protein 36 isoform 1                    | NP_057159.2       | 3          | 3                 | 3          | 5      | 0.82                                                     | 0.64                                                     | 14.66                                                                                  | 28.27                                                                                  | 17.1                                                                                          | 26.1                                                                                          | 2                                                                              | 2                                                                              | 12620   | 51028          | chromosome 13 open reading frame 9                                              | Molecular function unknown                   | -                                     | Unclassified                     | Biological process unknown                                                   | CC                               | No                       |
| DCN         | 1634    | decorin isoform a preproprotein                                             | NP_001911.1       | 2          | 1                 | 1          | 17     | 0.82                                                     | 0.61                                                     | 5.17                                                                                   | 8.07                                                                                   | 16.5                                                                                          | 19.1                                                                                          | 15                                                                             | 15                                                                             | 501     | 1634           | decorin                                                                         | Extracellular matrix structural constituent  | Extracellular                         | Extracellular matrix protein     | Cell growth and/or maintenance                                               | SP;LRR;CC                        | Yes                      |
| ALS2CL      | 259173  | ALS2 C-terminal-like protein isoform 1                                      | NP_667340.2       | 1          | 1                 | 1          | 1      | 0.82                                                     | 0.61                                                     |                                                                                        |                                                                                        |                                                                                               |                                                                                               | 1                                                                              | 1                                                                              | 10643   | 259173         | ALS2 C-terminal like                                                            | Molecular function unknown                   | Cytoplasm                             | Unclassified                     | Cell communication;Signal transduction                                       | MORN;VPS9;PH                     | Yes                      |
| AFAP1L2     | 84632   | actin filament-associated protein 1-like 2 isoform 3                        | NP_001274753.1    | 3          | 3                 | 3          | 9      | 0.82                                                     | 0.59                                                     | 19.42                                                                                  | 22.09                                                                                  | 36.6                                                                                          | 29.6                                                                                          | 5                                                                              | 5                                                                              | 13902   | 84632          | KIAA1914                                                                        | Transcription regulator activity             | Cytoplasm                             | Adapter molecule                 | Signal transduction                                                          | PH;CC                            | No                       |
| CHD1        | 1105    | chromodomain-helicase-DNA-binding protein 1                                 | NP_001261.2       | 1          | 2                 | 4          | 7      | 0.81                                                     | 1.56                                                     | 21.42                                                                                  | 14.96                                                                                  | 24.8                                                                                          | 34                                                                                            | 2                                                                              | 2                                                                              | 3668    | 1105           | chromodomain helicase DNA binding protein 1                                     | DNA binding                                  | Nucleus                               | DNA binding protein              | Regulation of nucleobase, nucleoside, nucleotide and nucleic acid metabolism | CHROMO;DEXDc;HELIC;CC            | Yes                      |
| MYLK        | 4638    | myosin light chain kinase, smooth muscle isoform 1                          | NP_444253.3       | 9          | 1                 | 2          | 4      | 0.81                                                     | 1.38                                                     |                                                                                        |                                                                                        |                                                                                               |                                                                                               | 1                                                                              | 1                                                                              | 2952    | 4638           | myosin, light polypeptide kinase                                                | Protein serine/threonine kinase activity     | Plasma membrane                       | Serine/threonine kinase          | Cell communication;Signal transduction                                       | IGC2;FN3_S_T_kinase;S_T_Y_Kinase | Yes                      |
| C11orf68    | 83638   | UPF0696 protein C11orf68 isoform 1                                          | NP_001129107.1    | 2          | 2                 | 2          | 3      | 0.81                                                     | 1.34                                                     |                                                                                        |                                                                                        |                                                                                               |                                                                                               | 1                                                                              | 1                                                                              | 12553   | 83638          | None                                                                            | Molecular function unknown                   | -                                     | Unclassified                     | Biological process unknown                                                   | -                                | No                       |
| CLASP2      | 23122   | CLIP-associating protein 2 isoform 2                                        | NP_001193973.1    | 1          | 1                 | 6          | 20     | 0.81                                                     | 1.27                                                     |                                                                                        |                                                                                        |                                                                                               |                                                                                               | 1                                                                              | 1                                                                              | 12054   | 23122          | cytoplasmic linker associated protein 2                                         | Cytoskeletal protein binding                 | Cytoplasm                             | Cytoskeletal associated protein  | Cell growth and/or maintenance                                               | -                                | No                       |
| SCAP        | 22937   | sterol regulatory element-binding protein cleavage-activating protein       | NP_036367.2       | 1          | 1                 | 1          | 2      | 0.81                                                     | 1.13                                                     |                                                                                        |                                                                                        |                                                                                               |                                                                                               | 1                                                                              | 1                                                                              | 3300    | 22937          | None                                                                            | Chaperone activity                           | Endoplasmic reticulum                 | Chaperone                        | Metabolism;Energy pathways                                                   | WD40;TM                          | Yes                      |
| HMG2        | 3151    | non-histone chromosomal protein HMG-17                                      | NP_005508.1       | 1          | 4                 | 4          | 20     | 0.81                                                     | 1.12                                                     | 10.19                                                                                  | 13.29                                                                                  | 27.9                                                                                          | 52.5                                                                                          | 11                                                                             | 11                                                                             | 1230    | 3151           | high-mobility group nucleosomal binding domain2                                 | Transcription regulator activity             | Nucleus                               | Transcription regulatory protein | Regulation of nucleobase, nucleoside, nucleotide and nucleic acid metabolism | NLS                              | Yes                      |
| PCYOX1      | 51449   | prenylcysteine oxidase 1 precursor                                          | NP_057381.3       | 1          | 10                | 10         | 32     | 0.81                                                     | 1.08                                                     | 5.78                                                                                   | 7.45                                                                                   | 21.8                                                                                          | 38.2                                                                                          | 21                                                                             | 21                                                                             | 11422   | 51449          | prenylcysteine oxidase 1                                                        | Catalytic activity                           | Lysosome                              | Enzyme;Oxidase                   | Metabolism;Energy pathways                                                   | -                                | Yes                      |
| NCK1        | 4690    | cytoplasmic protein NCK1 isoform 1                                          | NP_006144.1       | 3          | 2                 | 2          | 3      | 0.81                                                     | 1.07                                                     | 22.81                                                                                  | 11.03                                                                                  | 26.5                                                                                          | 16.9                                                                                          | 2                                                                              | 2                                                                              | 2740    | 4690           | NCK adaptor protein 1                                                           | Receptor signaling complex scaffold activity | Cytoplasm                             | Adapter molecule                 | Cell communication;Signal transduction                                       | SH3;SH2                          | Yes                      |
| TXNRD2      | 10587   | thioredoxin reductase 2, mitochondrial isoform 1 precursor                  | NP_006431.2       | 1          | 1                 | 1          | 2      | 0.81                                                     | 1.07                                                     |                                                                                        |                                                                                        |                                                                                               |                                                                                               | 1                                                                              | 1                                                                              | 18519   | 10587          | thioredoxin reductase 2                                                         | Catalytic activity                           | Mitochondrion                         | Enzyme;Reductase                 | Cell death;Cell proliferation                                                | -                                | Yes                      |
| BAIAP2L1    | 55971   | brain-specific angiogenesis inhibitor 1-associated protein 2-like protein 1 | NP_061330.2       | 1          | 4                 | 4          | 8      | 0.81                                                     | 1.06                                                     | 12                                                                                     | 10.02                                                                                  | 22                                                                                            | 24                                                                                            | 5                                                                              | 5                                                                              | 11270   | 55971          | BAI1-associated protein 2-like 1                                                | Molecular function unknown                   | -                                     | Unclassified                     | Biological process unknown                                                   | SH3;CC                           | No                       |
| ARL6IP4     | 51329   | ADP-ribosylation factor-like protein 6 interacting protein 4 isoform 3      | NP_001002251.2    | 4          | 2                 | 6          | 11     | 0.81                                                     | 1.06                                                     |                                                                                        |                                                                                        |                                                                                               |                                                                                               | 1                                                                              | 1                                                                              | 9640    | 51329          | ADP-ribosylation-like factor 6 interacting protein 4                            | Molecular function unknown                   | Nucleus;Cytoplasm                     | Unclassified                     | Regulation of nucleobase, nucleoside, nucleotide and nucleic acid metabolism | NLS                              | No                       |
| GNAQ        | 2776    | guanine nucleotide-binding protein (Gq) subunit alpha                       | NP_002063.2       | 1          | 5                 | 8          | 18     | 0.81                                                     | 1.06                                                     | 12.68                                                                                  | 6.51                                                                                   | 23.4                                                                                          | 15.6                                                                                          | 5                                                                              | 5                                                                              | 2998    | 2776           | guanine nucleotide binding protein (G protein) alpha polypeptide                | GTPase activity                              | Plasma membrane                       | G protein                        | Cell communication;Signal transduction                                       | CC                               | Yes                      |
| POP4        | 10775   | ribonuclease P protein subunit p29                                          | NP_006618.1       | 1          | 1                 | 1          | 2      | 0.81                                                     | 1.05                                                     |                                                                                        |                                                                                        |                                                                                               |                                                                                               | 1                                                                              | 1                                                                              | 9358    | 10775          | processing of precursor 4, ribonuclease P/MRP subunit (S. cerevisiae)           | Ribonuclease activity                        | Nucleolus                             | Ribonuclease                     | Protein metabolism                                                           | -                                | No                       |
| CPSF6       | 11052   | cleavage and polyadenylation specificity factor subunit 6 isoform 2         | NP_001287876.1    | 2          | 12                | 12         | 24     | 0.81                                                     | 1.05                                                     | 10.69                                                                                  | 6.79                                                                                   | 31.8                                                                                          | 26.1                                                                                          | 13                                                                             | 13                                                                             | 5401    | 11052          | cleavage and polyadenylation specific factor 6,68kDa                            | RNA binding                                  | Nucleus                               | RNA binding protein              | Regulation of nucleobase, nucleoside, nucleotide and nucleic acid metabolism | RRM                              | Yes                      |
| TUBA4A      | 7277    | tubulin alpha-4A chain isoform 1                                            | NP_005591.1       | 4          | 8                 | 28         | 418    | 0.81                                                     | 1.05                                                     | 5.62                                                                                   | 4.94                                                                                   | 27.7                                                                                          | 31.9                                                                                          | 36                                                                             | 36                                                                             | 1851    | 7277           | tubulin, alpha 1 (testis specific)                                              | Structural constituent of cytoskeleton       | Cytoplasm                             | Cytoskeletal protein             | Cell growth and/or maintenance                                               | TUBULIN                          | Yes                      |
| CREBBP      | 1387    | CREB-binding protein isoform a                                              | NP_004371.2       | 3          | 1                 | 1          | 2      | 0.81                                                     | 1.04                                                     |                                                                                        |                                                                                        |                                                                                               |                                                                                               | 1                                                                              | 1                                                                              | 2534    | 1387           | CREB binding protein (Rubinstein-Taybis syndrome)                               | Transcription regulator activity             | Nucleus                               | Transcription regulatory protein | Regulation of nucleobase, nucleoside, nucleotide and nucleic acid metabolism | BROMO;ZnF;ZZ;CC                  | Yes                      |
| ALG3        | 10195   | dol-P-Mann(5)GlcNAc(2)-PP-Dal alpha-1,3-mannosyltransferase isoform a       | NP_005778.1       | 1          | 1                 | 1          | 2      | 0.81                                                     | 1.03                                                     |                                                                                        |                                                                                        |                                                                                               |                                                                                               | 1                                                                              | 1                                                                              | 3067    | 10195          | asparagine-linked glycosylation 3 homolog(yeast, alpha-1,3-mannosyltransferase) | Transferase activity                         | Endoplasmic reticulum membrane        | Enzyme;Mannosyltransferase       | Metabolism;Energy pathways                                                   | TM                               | Yes                      |
| LPXN        | 9404    | leupaxin isoform 1                                                          | NP_001137467.1    | 3          | 2                 | 2          | 6      | 0.81                                                     | 1                                                        | 5.32                                                                                   | 9.59                                                                                   | 7.5                                                                                           | 16.7                                                                                          | 3                                                                              | 3                                                                              | 5651    | 9404           | leupaxin                                                                        | Receptor signaling complex scaffold activity | Cytoplasm;Nucleus                     | Adapter molecule                 | Cell communication;Signal transduction                                       | LIM                              | Yes                      |
| TNPO2       | 30000   | transportin-2 isoform 2                                                     | NP_038461.2       | 2          | 5                 | 9          | 33     | 0.81                                                     | 0.99                                                     | 8.74                                                                                   | 12.71                                                                                  | 16                                                                                            | 28.7                                                                                          | 5                                                                              | 5                                                                              | 4301    | 30000          | transportin 2 (importin beta 2b)                                                | Transporter activity                         | Nucleoplasm                           | Transport/cargo protein          | Transport                                                                    | IBN_NT;HEAT;ARM                  | Yes                      |

Supplementary Table S1. List of quantified proteins in OKF6/TERT1-Smoke cells  
 Raigopaln *et al.*, 2017. Role of protein kinase N2 (PKN2) in cigarette smoke-mediated oncogenic transformation of oral cells

| Gene Symbol   | Gene ID   | Protein Description                                            | Protein Accession | # Proteins | # Unique Peptides | # Peptides | # PSMs | OKF6/TERT1-Smoke/<br>OKF6/TERT1-Parental<br>(130/126) R1 | OKF6/TERT1-Smoke/<br>OKF6/TERT1-Parental<br>(128/127) R2 | Ratio Standard Errors [%]:<br>OKF6/TERT1-Smoke/<br>OKF6/TERT1-Parental<br>(130/126) R1 | Ratio Standard Errors [%]:<br>OKF6/TERT1-Smoke/<br>OKF6/TERT1-Parental<br>(128/127) R2 | Ratio Variabilities [%]:<br>F13: OKF6/TERT1-<br>Smoke/<br>OKF6/TERT1-Parental<br>(130/126) R1 | Ratio Variabilities [%]:<br>F13: OKF6/TERT1-<br>Smoke/<br>OKF6/TERT1-Parental<br>(128/127) R2 | Ratio Counts: F13:<br>OKF6/TERT1-Smoke/<br>OKF6/TERT1-Parental<br>(130/126) R1 | Ratio Counts: F13:<br>OKF6/TERT1-Smoke/<br>OKF6/TERT1-Parental<br>(128/127) R2 | HPRD ID | Entrez Gene ID | Gene Name                                                                                                                           | Molecular Function                     | Primary Localization    | Molecular Class            | Biological Process                                                      | Domains       | Plasma Proteome Database |
|---------------|-----------|----------------------------------------------------------------|-------------------|------------|-------------------|------------|--------|----------------------------------------------------------|----------------------------------------------------------|----------------------------------------------------------------------------------------|----------------------------------------------------------------------------------------|-----------------------------------------------------------------------------------------------|-----------------------------------------------------------------------------------------------|--------------------------------------------------------------------------------|--------------------------------------------------------------------------------|---------|----------------|-------------------------------------------------------------------------------------------------------------------------------------|----------------------------------------|-------------------------|----------------------------|-------------------------------------------------------------------------|---------------|--------------------------|
| GPAI1         | 8733      | glycosylphosphatidylinositol anchor attachment 1 protein       | NP_003792.1       | 1          | 2                 | 2          | 2      | 0.81                                                     | 0.99                                                     | 20.82                                                                                  | 9.34                                                                                   | 24.3                                                                                          | 13.1                                                                                          | 2                                                                              | 2                                                                              | 4334    | 8733           | GPAI1P anchor attachment protein 1 (homology/yeast)                                                                                 | Cytoskeletal anchoring activity        | Endoplasmic reticulum   | Anchor protein             | Protein metabolism                                                      | TM            | Yes                      |
| ARPC2         | 10109     | actin-related protein 2/3 complex subunit 2                    | NP_005722.1       | 1          | 12                | 12         | 33     | 0.81                                                     | 0.99                                                     | 6.44                                                                                   | 7.27                                                                                   | 24.3                                                                                          | 34.1                                                                                          | 21                                                                             | 21                                                                             | 10367   | 10109          | actin related protein 2/3 complex, subunit 2,34kDa                                                                                  | Cytoskeletal protein binding           | Actin cytoskeleton      | Cytoskeletal protein       | Cell growth and/or maintenance;Cytoskeleton organization and biogenesis | -             | Yes                      |
| GLB1          | 2720      | beta-galactosidase isoform a preproprotein                     | NP_000395.2       | 5          | 10                | 10         | 42     | 0.81                                                     | 0.96                                                     | 5.22                                                                                   | 10.2                                                                                   | 20.5                                                                                          | 49.4                                                                                          | 23                                                                             | 23                                                                             | 1975    | 2720           | galactosidase, beta 1                                                                                                               | Catalytic activity                     | Lysosome                | Enzyme: Hydroxylase        | Metabolism;Energy pathways                                              | SP            | Yes                      |
| RAB5C         | 5878      | ras-related protein Rab-5C isoform b                           | NP_001238968.1    | 2          | 8                 | 11         | 74     | 0.81                                                     | 0.95                                                     | 15.02                                                                                  | 17.54                                                                                  | 70.4                                                                                          | 105.3                                                                                         | 27                                                                             | 27                                                                             | 4947    | 5878           | RAB5C, member RAS oncogene family                                                                                                   | GTPase activity                        | Endosome                | GTPase                     | Cell communication;Signal transduction                                  | RAB           | Yes                      |
| IDH1          | 3417      | isocitrate dehydrogenase [NADP] cytoplasmic                    | NP_005887.2       | 1          | 22                | 23         | 82     | 0.81                                                     | 0.94                                                     | 5.25                                                                                   | 7.61                                                                                   | 27.9                                                                                          | 48.1                                                                                          | 41                                                                             | 41                                                                             | 984     | 3417           | isocitrate dehydrogenase 1 (NADP+), soluble                                                                                         | Catalytic activity                     | Cytoplasm               | Enzyme: Dehydrogenase      | Metabolism;Energy pathways                                              | -             | Yes                      |
| CD46          | 4179      | membrane cofactor protein isoform 2 precursor                  | NP_758869.1       | 8          | 4                 | 4          | 9      | 0.81                                                     | 0.94                                                     | 7.38                                                                                   | 2.59                                                                                   | 14.7                                                                                          | 6                                                                                             | 6                                                                              | 6                                                                              | 406     | 4179           | membrane cofactor protein (CD46,prophylaxis lymphocyte cross reactive antigen)                                                      | Receptor activity                      | Plasma membrane         | Cell surface receptor      | Cell communication;Signal transduction                                  | TM;SUSHI;SP   | Yes                      |
| MVP           | 9961      | major vault protein isoform 1                                  | NP_005106.2       | 3          | 40                | 40         | 194    | 0.81                                                     | 0.93                                                     | 3.67                                                                                   | 3.57                                                                                   | 28.8                                                                                          | 32.7                                                                                          | 91                                                                             | 92                                                                             | 5475    | 9961           | major vault protein                                                                                                                 | Nucleocytoplasmic transporter activity | Cytoplasm               | Transport/cargo protein    | Cell growth and/or maintenance                                          | CC            | Yes                      |
| ZWILCH        | 55055     | protein zwilch homolog isoform 1                               | NP_060445.3       | 2          | 2                 | 2          | 5      | 0.81                                                     | 0.93                                                     | 0.65                                                                                   | 10.87                                                                                  | 0.9                                                                                           | 17.6                                                                                          | 3                                                                              | 3                                                                              | 7640    | 55055          | None                                                                                                                                | Molecular function unknown             | Kinetochore             | Unclassified               | Biological process unknown                                              | -             | No                       |
| WLS           | 79971     | protein wless homolog isoform 2                                | NP_001002292.3    | 3          | 1                 | 1          | 1      | 0.81                                                     | 0.92                                                     |                                                                                        |                                                                                        |                                                                                               |                                                                                               | 1                                                                              | 1                                                                              |         |                |                                                                                                                                     |                                        |                         |                            |                                                                         |               |                          |
| PKM           | 5315      | pyruvate kinase PKM isoform a                                  | NP_002645.3       | 5          | 5                 | 41         | 641    | 0.81                                                     | 0.91                                                     | 5.28                                                                                   | 5.37                                                                                   | 28                                                                                            | 32.2                                                                                          | 41                                                                             | 41                                                                             |         |                |                                                                                                                                     |                                        |                         |                            |                                                                         |               |                          |
| GLOD4         | 51031     | glyoxalase domain-containing protein 4                         | NP_057164.3       | 1          | 10                | 10         | 34     | 0.81                                                     | 0.9                                                      | 7.95                                                                                   | 5.12                                                                                   | 27.7                                                                                          | 19.7                                                                                          | 18                                                                             | 18                                                                             | 12678   | 51031          | chromosome 17 open reading frame 25                                                                                                 | Molecular function unknown             | Mitochondrion           | Unclassified               | Biological process unknown                                              | -             | Yes                      |
| KIF11         | 3832      | kinesin-like protein KIF11                                     | NP_004514.2       | 1          | 2                 | 2          | 3      | 0.81                                                     | 0.89                                                     | 6.95                                                                                   | 29.6                                                                                   | 8                                                                                             | 38.6                                                                                          | 2                                                                              | 2                                                                              | 1023    | 3832           | kinesin family member 11                                                                                                            | Motor activity                         | Cytoplasm               | Motor protein              | Cell growth and/or maintenance                                          | KISC;CC       | Yes                      |
| PPA2          | 27068     | inorganic pyrophosphatase 2, mitochondrial isoform 1 precursor | NP_789845.1       | 4          | 13                | 14         | 38     | 0.81                                                     | 0.89                                                     | 8.68                                                                                   | 6.98                                                                                   | 29.7                                                                                          | 26.1                                                                                          | 17                                                                             | 17                                                                             | 18494   | 27068          | None                                                                                                                                | Catalytic activity                     | Mitochondrion;Cytoplasm | Enzyme: Phosphatase        | Metabolism;Energy pathways                                              | SP            | Yes                      |
| DCTPP1        | 79077     | dCTP pyrophosphatase 1                                         | NP_077001.1       | 1          | 4                 | 4          | 7      | 0.81                                                     | 0.88                                                     | 6.89                                                                                   | 2.83                                                                                   | 11.2                                                                                          | 5                                                                                             | 4                                                                              | 4                                                                              | 18310   | 79077          | None                                                                                                                                | Molecular function unknown             | -                       | Unclassified               | Biological process unknown                                              | -             | No                       |
| DHRS7         | 51635     | dehydrogenase/reductase SDR family member 7 precursor          | NP_057113.1       | 1          | 9                 | 9          | 27     | 0.81                                                     | 0.87                                                     | 4.69                                                                                   | 12.14                                                                                  | 12.6                                                                                          | 36.3                                                                                          | 11                                                                             | 11                                                                             | 16802   | 51635          | dehydrogenase/reductase (SDR family) member 7                                                                                       | Catalytic activity                     | -                       | Enzyme: Dehydrogenase      | Metabolism;Energy pathways                                              | SP            | Yes                      |
| MACROD1       | 28992     | O-acetyl-ADP-ribose deacetylase MACROD1                        | NP_054786.2       | 1          | 3                 | 3          | 4      | 0.81                                                     | 0.86                                                     | 22.5                                                                                   | 0.38                                                                                   | 32.3                                                                                          | 0.6                                                                                           | 3                                                                              | 3                                                                              | 17448   | 28992          | None                                                                                                                                | Molecular function unknown             | Mitochondrion           | Unclassified               | Regulation of nucleobase, nucleotide and nucleic acid metabolism        | A1pp          | Yes                      |
| TRIM14        | 9830      | tripartite motif-containing protein 14                         | NP_055603.2       | 1          | 2                 | 2          | 5      | 0.81                                                     | 0.84                                                     | 14.93                                                                                  | 2.8                                                                                    | 17.3                                                                                          | 3.3                                                                                           | 2                                                                              | 2                                                                              | 5948    | 9830           | tripartite motif-containing 14                                                                                                      | Molecular function unknown             | Cytoplasm               | Unclassified               | Biological process unknown                                              | BBOX;PRY;SPRY | Yes                      |
| AKR7A2        | 8574      | aflatoxin B1 aldehyde reductase member 2                       | NP_003680.2       | 2          | 6                 | 6          | 21     | 0.81                                                     | 0.83                                                     | 6.42                                                                                   | 9.02                                                                                   | 17.5                                                                                          | 25.3                                                                                          | 11                                                                             | 11                                                                             | 4567    | 8574           | aldo-keto reductase family 7, member A2(aflatoxin aldehyde reductase)                                                               | Catalytic activity                     | Cytoplasm               | Enzyme: Reductase          | Metabolism;Energy pathways                                              | ALDKR         | Yes                      |
| HADHA         | 3030      | trifunctional enzyme subunit alpha, mitochondrial precursor    | NP_000173.2       | 1          | 40                | 40         | 197    | 0.81                                                     | 0.83                                                     | 4.04                                                                                   | 4.63                                                                                   | 35.8                                                                                          | 42.6                                                                                          | 113                                                                            | 112                                                                            | 2934    | 3030           | hydroxyacyl-Coenzyme A dehydrogenase/3-oxoacyl-Coenzyme A thiolase/enoyl-Coenzyme A hydratase(trifunctional protein), alpha subunit | Catalytic activity                     | Mitochondrion           | Enzyme: Dehydrogenase      | Metabolism;Energy pathways                                              | CC            | Yes                      |
| PTGESL-AARSD1 | 100885850 | PTGESL-AARSD1 protein isoform 1                                | NP_001129514.2    | 3          | 2                 | 2          | 8      | 0.81                                                     | 0.83                                                     | 16.09                                                                                  | 1.94                                                                                   | 26.5                                                                                          | 3.2                                                                                           | 4                                                                              | 4                                                                              |         |                |                                                                                                                                     |                                        |                         |                            |                                                                         |               |                          |
| SLC9A1        | 6548      | sodium/hydrogen exchanger 1                                    | NP_003038.2       | 1          | 6                 | 6          | 10     | 0.81                                                     | 0.83                                                     | 19.56                                                                                  | 16.43                                                                                  | 40.5                                                                                          | 34.3                                                                                          | 6                                                                              | 6                                                                              | 123     | 6548           | solute carrier family 9 (sodium/hydrogen exchanger), isoform 1 (antiporter, Na+H+, amiloride sensitive)                             | Auxiliary transport protein activity   | Plasma membrane         | Membrane transport protein | Transport                                                               | CC;TM;SP      | Yes                      |
| VIM           | 7431      | vimentin                                                       | NP_003371.2       | 8          | 44                | 52         | 371    | 0.81                                                     | 0.81                                                     | 3.03                                                                                   | 3.91                                                                                   | 34                                                                                            | 44.8                                                                                          | 182                                                                            | 181                                                                            | 1899    | 7431           | vimentin                                                                                                                            | Structural constituent of cytoskeleton | Intermediate filament   | Cytoskeletal protein       | Cell growth and/or maintenance                                          | CC            | Yes                      |
| EFS           | 10278     | embryonal Fyn-associated substrate isoform 1                   | NP_005855.1       | 3          | 1                 | 1          | 1      | 0.81                                                     | 0.8                                                      |                                                                                        |                                                                                        |                                                                                               |                                                                                               | 1                                                                              | 1                                                                              | 9932    | 10278          | embryonal Fyn-associated substrate                                                                                                  | Molecular function unknown             | Cytoplasm               | Unclassified               | Signal transduction                                                     | SH3           | Yes                      |
| MCM2          | 4171      | DNA replication licensing factor MCM2                          | NP_004517.2       | 1          | 15                | 15         | 37     | 0.81                                                     | 0.79                                                     | 4.84                                                                                   | 10.7                                                                                   | 17.2                                                                                          | 38.3                                                                                          | 19                                                                             | 19                                                                             | 303     | 4171           | MCM2 minichromosome maintenance deficient 2,mitotin (S. cerevisiae)                                                                 | DNA binding                            | Nucleus                 | DNA binding protein        | Regulation of nucleobase, nucleotide and nucleic acid metabolism        | MCM;CC        | Yes                      |
| TMEM11        | 8834      | transmembrane protein 11, mitochondrial                        | NP_003867.1       | 1          | 2                 | 2          | 4      | 0.81                                                     | 0.78                                                     | 10.81                                                                                  | 9.86                                                                                   | 12.4                                                                                          | 10.9                                                                                          | 2                                                                              | 2                                                                              | 12680   | 8834           | chromosome 17 open reading frame 35                                                                                                 | Molecular function unknown             | Plasma membrane         | Integral membrane protein  | Cell communication;Signal transduction                                  | TM            | No                       |
| MVK           | 4598      | mevalonate kinase isoform a                                    | NP_000422.1       | 2          | 7                 | 7          | 19     | 0.81                                                     | 0.78                                                     | 10.12                                                                                  | 10.54                                                                                  | 27.6                                                                                          | 27.8                                                                                          | 11                                                                             | 11                                                                             | 2015    | 4598           | mevalonate kinase (mevalonic aciduria)                                                                                              | Catalytic activity                     | Cytoplasm               | Enzyme: Phosphotransferase | Metabolism;Energy pathways                                              | -             | Yes                      |

Supplementary Table S1. List of quantified proteins in OKF6/TERT1-Smoke cells  
 Raingonalan *et al.*, 2017. Role of protein kinase N2 (PKN2) in cigarette smoke-mediated oncogenic transformation of oral cells

| Gene Symbol | Gene ID | Protein Description                                                 | Protein Accession | # Proteins | # Unique Peptides | # Peptides | # PSMs | OKF6/TERT1-Smoke/<br>OKF6/TERT1-Parental<br>(130/126) R1 | OKF6/TERT1-Smoke/<br>OKF6/TERT1-Parental<br>(128/127) R2 | Ratio Standard Errors [%]:<br>OKF6/TERT1-Smoke/<br>OKF6/TERT1-Parental<br>(130/126) R1 | Ratio Standard Errors [%]:<br>OKF6/TERT1-Smoke/<br>OKF6/TERT1-Parental<br>(128/127) R2 | Ratio Variabilities [%]:<br>F13: OKF6/TERT1-<br>Smoke/<br>OKF6/TERT1-Parental<br>(130/126) R1 | Ratio Variabilities [%]:<br>F13: OKF6/TERT1-<br>Smoke/<br>OKF6/TERT1-Parental<br>(128/127) R2 | Ratio Counts: F13:<br>OKF6/TERT1-Smoke/<br>OKF6/TERT1-Parental<br>(130/126) R1 | Ratio Counts: F13:<br>OKF6/TERT1-Smoke/<br>OKF6/TERT1-Parental<br>(128/127) R2 | HPRD ID | Entrez Gene ID | Gene Name                                                               | Molecular Function                                                                | Primary Localization | Molecular Class                                | Biological Process                                                           | Domains                      | Plasma Proteome Database |
|-------------|---------|---------------------------------------------------------------------|-------------------|------------|-------------------|------------|--------|----------------------------------------------------------|----------------------------------------------------------|----------------------------------------------------------------------------------------|----------------------------------------------------------------------------------------|-----------------------------------------------------------------------------------------------|-----------------------------------------------------------------------------------------------|--------------------------------------------------------------------------------|--------------------------------------------------------------------------------|---------|----------------|-------------------------------------------------------------------------|-----------------------------------------------------------------------------------|----------------------|------------------------------------------------|------------------------------------------------------------------------------|------------------------------|--------------------------|
| SP3         | 6670    | transcription factor Sp3 isoform 1                                  | NP_003102.1       | 3          | 1                 | 1          | 2      | 0.81                                                     | 0.77                                                     |                                                                                        |                                                                                        |                                                                                               |                                                                                               | 1                                                                              | 1                                                                              | 3483    | 6670           | Sp3 transcription factor                                                | Transcription factor activity                                                     | Nucleus              | Transcription factor                           | Regulation of nucleobase, nucleoside, nucleotide and nucleic acid metabolism | ZNF2                         | Yes                      |
| RNF123      | 63891   | E3 ubiquitin-protein ligase RNF123                                  | NP_071347.2       | 1          | 2                 | 2          | 2      | 0.81                                                     | 0.77                                                     |                                                                                        |                                                                                        |                                                                                               |                                                                                               | 1                                                                              | 1                                                                              | 11499   | 63891          | ring finger protein 123                                                 | Ubiquitin-specific protease activity                                              | Cytoplasm            | Ubiquitin proteasome system protein            | Protein metabolism                                                           | SPRY,CC,RING                 | No                       |
| UBN2        | 254048  | ubiquitin-2                                                         | NP_775840.3       | 1          | 1                 | 1          | 3      | 0.81                                                     | 0.77                                                     |                                                                                        |                                                                                        |                                                                                               |                                                                                               | 1                                                                              | 1                                                                              | 19387   | 254048         | None                                                                    | Molecular function unknown                                                        | -                    | Unclassified                                   | Biological process unknown                                                   | -                            | No                       |
| DPM1        | 8813    | dolichol-phosphate mannosyltransferase subunit 1                    | NP_003850.1       | 1          | 6                 | 6          | 14     | 0.81                                                     | 0.76                                                     | 8.16                                                                                   | 8.43                                                                                   | 16.3                                                                                          | 15.8                                                                                          | 6                                                                              | 6                                                                              | 4613    | 8813           | dolichyl-phosphate mannosyltransferase polypeptide 1, catalytic subunit | Mannosyltransferase activity                                                      | Plasma membrane      | Enzyme; Synthase                               | Metabolism;Energy pathways                                                   | -                            | Yes                      |
| C20orf27    | 54976   | UPF0687 protein C20orf27 isoform 1                                  | NP_001034229.1    | 2          | 1                 | 1          | 7      | 0.81                                                     | 0.74                                                     | 7.37                                                                                   | 8.97                                                                                   | 12                                                                                            | 13.3                                                                                          | 4                                                                              | 4                                                                              | 16648   | 54976          | chromosome 20 open reading frame 27                                     | Molecular function unknown                                                        | -                    | Unclassified                                   | Biological process unknown                                                   | -                            | No                       |
| RNPEP       | 6051    | aminopeptidase B                                                    | NP_064601.3       | 1          | 24                | 24         | 79     | 0.81                                                     | 0.74                                                     | 4.8                                                                                    | 4.83                                                                                   | 26.8                                                                                          | 24.6                                                                                          | 46                                                                             | 46                                                                             | 4055    | 6051           | arginyl-aminopeptidase (aminopeptidase B)                               | Aminopeptidase activity                                                           | Golgi apparatus      | Aminopeptidase                                 | Protein metabolism                                                           | -                            | Yes                      |
| ACTG1       | 71      | actin, cytoplasmic 2                                                | NP_001186883.1    | 2          | 12                | 34         | 1614   | 0.81                                                     | 0.74                                                     | 1.92                                                                                   | 4.83                                                                                   | 33.9                                                                                          | 87.1                                                                                          | 452                                                                            | 443                                                                            | 17      | 71             | actin, gamma 1                                                          | Structural constituent of cytoskeleton                                            | Cytoplasm            | Structural protein                             | Cell growth and/or maintenance                                               | ACTIN                        | Yes                      |
| CHMP6       | 79643   | charged multivesicular body protein 6                               | NP_078867.2       | 1          | 1                 | 1          | 2      | 0.81                                                     | 0.7                                                      |                                                                                        |                                                                                        |                                                                                               |                                                                                               | 1                                                                              | 1                                                                              | 8564    | 79643          | chromatin modifying protein 6                                           | Molecular function unknown                                                        | -                    | Unclassified                                   | Transport                                                                    | CC                           | No                       |
| C9orf41     | 138199  | UPF0586 protein C9orf41                                             | NP_689633.1       | 1          | 1                 | 1          | 2      | 0.81                                                     | 0.68                                                     |                                                                                        |                                                                                        |                                                                                               |                                                                                               | 1                                                                              | 1                                                                              | 12958   | 138199         | chromosome 9 open reading frame 41                                      | Molecular function unknown                                                        | -                    | Unclassified                                   | Biological process unknown                                                   | -                            | No                       |
| CMPK1       | 51727   | UMP-CMP kinase isoform a                                            | NP_057392.1       | 1          | 2                 | 2          | 3      | 0.81                                                     | 0.64                                                     | 33.59                                                                                  | 84.64                                                                                  | 39.9                                                                                          | 89.4                                                                                          | 2                                                                              | 2                                                                              | 18258   | 51727          | cytidylate kinase                                                       | Catalytic activity                                                                | Cytoplasm            | Enzyme; Phosphotransferase                     | Regulation of nucleobase, nucleoside, nucleotide and nucleic acid metabolism | SP                           | Yes                      |
| KRT75       | 9119    | keratin, type II cytoskeletal 75                                    | NP_004684.2       | 2          | 1                 | 18         | 202    | 0.81                                                     | 0.6                                                      |                                                                                        |                                                                                        |                                                                                               |                                                                                               | 1                                                                              | 1                                                                              | 11057   | 9119           | None                                                                    | Structural molecule activity                                                      | -                    | Structural protein                             | Cell growth and/or maintenance                                               | CC                           | Yes                      |
| RBM47       | 54502   | RNA-binding protein 47 isoform a                                    | NP_001092104.1    | 2          | 1                 | 1          | 4      | 0.81                                                     | 0.57                                                     | 1.68                                                                                   | 2.61                                                                                   | 1.9                                                                                           | 2.1                                                                                           | 2                                                                              | 2                                                                              | 13373   | 54502          | None                                                                    | RNA binding                                                                       | -                    | RNA binding protein                            | Regulation of gene expression, epigenetic                                    | RRM                          | No                       |
| MST1R       | 4486    | macrophage-stimulating protein receptor isoform 1 preproprotein     | NP_002438.2       | 2          | 3                 | 3          | 4      | 0.81                                                     | 0.57                                                     | 4.99                                                                                   | 12.05                                                                                  | 7                                                                                             | 12                                                                                            | 3                                                                              | 3                                                                              | 2545    | 4486           | macrophage stimulating 1 receptor(c-met-related tyrosine kinase)        | Transmembrane receptor protein tyrosine kinase activity                           | Plasma membrane      | Receptor tyrosine kinase                       | Cell communication;Signal transduction                                       | TM,SEMA,PSLIP,T,Ty_Kinase,SP | Yes                      |
| MTMR1       | 8776    | myotubularin-related protein 1 isoform 1                            | NP_001293073.1    | 2          | 2                 | 2          | 3      | 0.81                                                     | 0.54                                                     | 11.06                                                                                  | 60.28                                                                                  | 12.7                                                                                          | 49                                                                                            | 2                                                                              | 2                                                                              | 2163    | 8776           | myotubularin related protein 1                                          | Protein tyrosine/serine/threonine phosphatase activity;Lipid phosphatase activity | -                    | Lipid phosphatase;Dual specificity phosphatase | Cell communication;Signal transduction                                       | GRAM,CC                      | Yes                      |
| TRIM16      | 10626   | tripartite motif-containing protein 16                              | NP_006461.3       | 1          | 1                 | 1          | 2      | 0.81                                                     | 0.51                                                     |                                                                                        |                                                                                        |                                                                                               |                                                                                               | 1                                                                              | 1                                                                              | 15552   | 10626          | tripartite motif-containing 16                                          | Structural constituent of cytoskeleton                                            | Cytoplasm            | Cytoskeletal protein                           | Cell growth and/or maintenance                                               | BBOX,CC,PRY,SPRY             | Yes                      |
| POLR2E      | 5434    | DNA-directed RNA polymerases I, II, and III subunit RPABC1          | NP_002686.2       | 1          | 1                 | 1          | 2      | 0.8                                                      | 1.83                                                     |                                                                                        |                                                                                        |                                                                                               |                                                                                               | 1                                                                              | 1                                                                              | 15946   | 5434           | polymerase (RNA) II (DNA directed) polypeptideE, 25kDa                  | DNA-directed RNA polymerase activity                                              | Nucleus              | RNA polymerase                                 | Regulation of nucleobase, nucleoside, nucleotide and nucleic acid metabolism | -                            | Yes                      |
| MED25       | 81857   | mediator of RNA polymerase II transcription subunit 25              | NP_112235.2       | 1          | 1                 | 1          | 2      | 0.8                                                      | 1.81                                                     |                                                                                        |                                                                                        |                                                                                               |                                                                                               | 1                                                                              | 1                                                                              | 14380   | 81857          | mediator of RNA polymerase II transcription, subunit 25 homolog (yeast) | Transcription regulator activity                                                  | Nucleus              | Transcription regulatory protein               | Regulation of nucleobase, nucleoside, nucleotide and nucleic acid metabolism | -                            | No                       |
| CPSF4       | 10898   | cleavage and polyadenylation specificity factor subunit 4 isoform 1 | NP_006684.1       | 2          | 1                 | 1          | 2      | 0.8                                                      | 1.76                                                     |                                                                                        |                                                                                        |                                                                                               |                                                                                               | 1                                                                              | 1                                                                              | 4338    | 10898          | cleavage and polyadenylation specific factor 4,30kDa                    | RNA binding                                                                       | Nucleus              | RNA binding protein                            | Regulation of nucleobase, nucleoside, nucleotide and nucleic acid metabolism | ZaF_C2HC,ZaF_C3H1            | Yes                      |
| KLHL24      | 54800   | kelch-like protein 24                                               | NP_060114.2       | 1          | 1                 | 1          | 1      | 0.8                                                      | 1.69                                                     |                                                                                        |                                                                                        |                                                                                               |                                                                                               | 1                                                                              | 1                                                                              | 16838   | 54800          | None                                                                    | Molecular function unknown                                                        | -                    | Unclassified                                   | Biological process unknown                                                   | BTB,KELCH                    | Yes                      |
| C19orf25    | 148223  | UPF0449 protein C19orf25                                            | NP_689695.2       | 1          | 1                 | 1          | 1      | 0.8                                                      | 1.5                                                      |                                                                                        |                                                                                        |                                                                                               |                                                                                               | 1                                                                              | 1                                                                              | 12703   | 148223         | chromosome 19 open reading frame 25                                     | Molecular function unknown                                                        | -                    | Unclassified                                   | Biological process unknown                                                   | -                            | No                       |
| NAB2        | 4665    | NGF-A-binding protein 2                                             | NP_005958.1       | 1          | 1                 | 1          | 2      | 0.8                                                      | 1.44                                                     |                                                                                        |                                                                                        |                                                                                               |                                                                                               | 1                                                                              | 1                                                                              | 3854    | 4665           | NGF-A binding protein 2 (EGR1 binding protein2)                         | Transcription regulator activity                                                  | Nucleus;Cytoplasm    | Transcription regulatory protein               | Regulation of nucleobase, nucleoside, nucleotide and nucleic acid metabolism | NLS                          | Yes                      |
| SAMD1       | 90378   | atherin                                                             | NP_612361.1       | 1          | 1                 | 1          | 1      | 0.8                                                      | 1.39                                                     |                                                                                        |                                                                                        |                                                                                               |                                                                                               | 1                                                                              | 1                                                                              | 18011   | 90378          | serine alpha motif domain containing 1                                  | Molecular function unknown                                                        | -                    | Unclassified                                   | Biological process unknown                                                   | SAM                          | No                       |
| TBP         | 6908    | TATA-box-binding protein isoform 1                                  | NP_003185.1       | 2          | 1                 | 1          | 2      | 0.8                                                      | 1.37                                                     |                                                                                        |                                                                                        |                                                                                               |                                                                                               | 1                                                                              | 1                                                                              | 2511    | 6908           | TATA box binding protein                                                | Transcription factor activity                                                     | Nucleus              | Transcription factor                           | Regulation of nucleobase, nucleoside, nucleotide and nucleic acid metabolism | CC                           | No                       |
| TBL1XR1     | 79718   | F-box-like/WD repeat-containing protein TBL1XR1                     | NP_078941.2       | 1          | 3                 | 3          | 4      | 0.8                                                      | 1.3                                                      | 0.92                                                                                   | 12.5                                                                                   | 1.3                                                                                           | 28.7                                                                                          | 3                                                                              | 3                                                                              | 15476   | 79718          | transducin (beta)-like 1X-linked receptor 1                             | Transcription regulator activity                                                  | Nucleus              | Transcription regulatory protein               | Regulation of nucleobase, nucleoside, nucleotide and nucleic acid metabolism | LISH,WD40                    | Yes                      |

Supplementary Table S1. List of quantified proteins in OKF6/TERT1-Smoke cells  
 Raingopaln *et al.*, 2017. Role of protein kinase N2 (PKN2) in cigarette smoke-mediated oncogenic transformation of oral cells

| Gene Symbol  | Gene ID   | Protein Description                                                     | Protein Accession | # Proteins | # Unique Peptides | # Peptides | # PSMs | OKF6/TERT1-Smoke/<br>OKF6/TERT1-Parental<br>(130/126) R1 | OKF6/TERT1-Smoke/<br>OKF6/TERT1-Parental<br>(128/127) R2 | Ratio Standard Errors [%]:<br>OKF6/TERT1-Smoke/<br>OKF6/TERT1-Parental<br>(130/126) R1 | Ratio Standard Errors [%]:<br>OKF6/TERT1-Smoke/<br>OKF6/TERT1-Parental<br>(128/127) R2 | Ratio Variabilities [%]:<br>F13: OKF6/TERT1-<br>Smoke/<br>OKF6/TERT1-Parental<br>(130/126) R1 | Ratio Variabilities [%]:<br>F13: OKF6/TERT1-<br>Smoke/<br>OKF6/TERT1-Parental<br>(128/127) R2 | Ratio Counts: F13:<br>OKF6/TERT1-Smoke/<br>OKF6/TERT1-Parental<br>(130/126) R1 | Ratio Counts: F13:<br>OKF6/TERT1-Smoke/<br>OKF6/TERT1-Parental<br>(128/127) R2 | HPRD ID | Entrez Gene ID | Gene Name                                                                                    | Molecular Function                           | Primary Localization              | Molecular Class                     | Biological Process                                               | Domains                   | Plasma Proteome Database |
|--------------|-----------|-------------------------------------------------------------------------|-------------------|------------|-------------------|------------|--------|----------------------------------------------------------|----------------------------------------------------------|----------------------------------------------------------------------------------------|----------------------------------------------------------------------------------------|-----------------------------------------------------------------------------------------------|-----------------------------------------------------------------------------------------------|--------------------------------------------------------------------------------|--------------------------------------------------------------------------------|---------|----------------|----------------------------------------------------------------------------------------------|----------------------------------------------|-----------------------------------|-------------------------------------|------------------------------------------------------------------|---------------------------|--------------------------|
| JTB          | 10899     | protein JTB precursor                                                   | NP_066685.1       | 1          | 1                 | 1          | 2      | 0.8                                                      | 1.28                                                     |                                                                                        |                                                                                        |                                                                                               |                                                                                               | 1                                                                              | 1                                                                              | 5240    | 10899          | Jumping translocation breakpoint                                                             | Molecular function unknown                   | Plasma membrane                   | Integral membrane protein           | Biological process unknown                                       | TM,SP                     | Yes                      |
| VDAC1        | 7416      | voltage-dependent anion-selective channel protein 1                     | NP_003365.1       | 1          | 15                | 16         | 112    | 0.8                                                      | 1.26                                                     | 5.13                                                                                   | 2.84                                                                                   | 28.5                                                                                          | 24.6                                                                                          | 46                                                                             | 46                                                                             | 5137    | 7416           | voltage-dependent anion channel 1                                                            | Voltage-gated ion channel activity           | Mitochondrion                     | Voltage gated channel               | Transport                                                        | -                         | Yes                      |
| ELP2         | 55250     | elongator complex protein 2 isoform 1                                   | NP_001229804.1    | 6          | 4                 | 4          | 6      | 0.8                                                      | 1.26                                                     | 8.42                                                                                   | 9.69                                                                                   | 11.6                                                                                          | 21.3                                                                                          | 3                                                                              | 3                                                                              | 15443   | 55250          | signal transducer and activator of transcription 3 interacting protein 1                     | Receptor signaling complex scaffold activity | Nucleus                           | Adapter molecule                    | Cell communication;Signal transduction                           | WD40                      | No                       |
| MRPL38       | 64978     | 39S ribosomal protein L38, mitochondrial                                | NP_115867.2       | 1          | 5                 | 5          | 10     | 0.8                                                      | 1.24                                                     | 20.88                                                                                  | 7.62                                                                                   | 42.5                                                                                          | 23.5                                                                                          | 6                                                                              | 6                                                                              | 14758   | 64978          | mitochondrial ribosomal protein L38                                                          | Structural constituent of ribosome           | Mitochondrion                     | Ribosomal subunit                   | Protein metabolism                                               | -                         | No                       |
| ADAM9        | 8754      | disintegrin and metalloproteinase domain-containing protein 9 precursor | NP_003807.1       | 1          | 10                | 10         | 16     | 0.8                                                      | 1.22                                                     | 5.68                                                                                   | 9.2                                                                                    | 13.7                                                                                          | 34.7                                                                                          | 9                                                                              | 9                                                                              | 4091    | 8754           | a disintegrin and metalloproteinase domain 9(meltrin gamma)                                  | Metallopeptidase activity                    | Plasma membrane;Nucleus;Cytoplasm | Metallo protease                    | Protein metabolism                                               | TM,REP;DISINT;ACR,SP;EGFL | Yes                      |
| MGST3        | 4259      | microsomal glutathione S-transferase 3                                  | NP_004519.1       | 1          | 4                 | 4          | 13     | 0.8                                                      | 1.19                                                     | 18.71                                                                                  | 43.61                                                                                  | 41                                                                                            | 236.5                                                                                         | 7                                                                              | 7                                                                              | 5192    | 4259           | microsomal glutathione S-transferase 3                                                       | Glutathione transferase activity             | Endoplasmic reticulum             | Enzyme: Glutathione transferase     | Metabolism;Energy pathways                                       | TM                        | Yes                      |
| C1orf35      | 79169     | multiple myeloma tumor-associated protein 2                             | NP_077295.1       | 1          | 1                 | 1          | 4      | 0.8                                                      | 1.15                                                     | 20.02                                                                                  | 20.68                                                                                  | 22.9                                                                                          | 34.8                                                                                          | 2                                                                              | 2                                                                              | 10090   | 79169          | chromosome 1 open reading frame 35                                                           | Molecular function unknown                   | Nucleus                           | Unclassified                        | Biological process unknown                                       | -                         | No                       |
| TMEM199      | 147007    | transmembrane protein 199                                               | NP_689677.1       | 1          | 2                 | 2          | 3      | 0.8                                                      | 1.13                                                     | 1.99                                                                                   | 7.96                                                                                   | 2.3                                                                                           | 12.8                                                                                          | 2                                                                              | 2                                                                              | 12679   | 147007         | chromosome 17 open reading frame 32                                                          | Molecular function unknown                   | -                                 | Unclassified                        | Biological process unknown                                       | TM                        | Yes                      |
| MDH2         | 4191      | malate dehydrogenase, mitochondrial isoform 1 precursor                 | NP_005909.2       | 4          | 20                | 20         | 122    | 0.8                                                      | 1.09                                                     | 3.07                                                                                   | 2.74                                                                                   | 19.3                                                                                          | 23.5                                                                                          | 60                                                                             | 60                                                                             | 1099    | 4191           | malate dehydrogenase 2, NAD (mitochondrial)                                                  | Catalytic activity                           | Mitochondrion                     | Enzyme: Dehydrogenase               | Metabolism;Energy pathways                                       | -                         | Yes                      |
| HTRA2        | 27429     | serine protease HTRA2, mitochondrial isoform 1 preproprotein            | NP_037379.1       | 4          | 3                 | 3          | 6      | 0.8                                                      | 1.09                                                     | 1.06                                                                                   | 1.74                                                                                   | 1.2                                                                                           | 3.3                                                                                           | 2                                                                              | 3                                                                              | 5919    | 27429          | protease, serine, 25                                                                         | Serine-type peptidase activity               | Mitochondrion                     | Serine protease                     | Protein metabolism                                               | TM,TRYPSIN,PDZ            | Yes                      |
| CLIP4        | 79745     | CAP-Gly domain-containing linker protein 4 isoform 1                    | NP_078968.3       | 2          | 1                 | 1          | 1      | 0.8                                                      | 1.06                                                     |                                                                                        |                                                                                        |                                                                                               |                                                                                               | 1                                                                              | 1                                                                              | 8634    | 79745          | resitin-like 2                                                                               | Cytoskeletal protein binding                 | -                                 | Cytoskeletal associated protein     | Cell growth and/or maintenance                                   | ANK                       | Yes                      |
| PSMB1        | 5689      | proteasome subunit beta type-1                                          | NP_002784.1       | 1          | 11                | 11         | 42     | 0.8                                                      | 1.04                                                     | 10.28                                                                                  | 4.59                                                                                   | 40.1                                                                                          | 22.7                                                                                          | 22                                                                             | 22                                                                             | 3603    | 5689           | proteasome (prosome, macropain) subunit, betatype, 1                                         | Ubiquitin-specific protease activity         | -                                 | Ubiquitin proteasome system protein | Protein metabolism                                               | -                         | Yes                      |
| BRE          | 9577      | BRCA1-A complex subunit BRE isoform 2                                   | NP_954661.1       | 4          | 4                 | 4          | 12     | 0.8                                                      | 1.04                                                     | 10.61                                                                                  | 8.71                                                                                   | 19.2                                                                                          | 20.5                                                                                          | 5                                                                              | 5                                                                              | 8498    | 9577           | brain and reproductive organ expressed (TNFRSF1A modulator)                                  | Binding                                      | Cytosol                           | Unclassified                        | Cell proliferation;Regulation of signal transduction             | -                         | No                       |
| HACD3        | 51495     | very-long-chain (3R)-3-hydroxyacyl-CoA dehydratase 3                    | NP_057479.2       | 1          | 4                 | 4          | 12     | 0.8                                                      | 1.01                                                     | 8.36                                                                                   | 1.28                                                                                   | 16.4                                                                                          | 3.2                                                                                           | 6                                                                              | 6                                                                              |         |                |                                                                                              |                                              |                                   |                                     |                                                                  |                           |                          |
| PDLIM5       | 10611     | PDZ and LIM domain protein 5 isoform a                                  | NP_006448.4       | 8          | 18                | 18         | 55     | 0.8                                                      | 1.01                                                     | 6.53                                                                                   | 6.35                                                                                   | 28.2                                                                                          | 35                                                                                            | 28                                                                             | 28                                                                             | 5799    | 10611          | PDZ and LIM domain 5                                                                         | Receptor signaling complex scaffold activity | Cytoplasm                         | Adapter molecule                    | Cell communication;Signal transduction                           | PDZ,LIM                   | Yes                      |
| SEC13        | 6396      | protein SEC13 homolog isoform 3                                         | NP_001129498.1    | 5          | 8                 | 8          | 22     | 0.8                                                      | 1.01                                                     | 15.82                                                                                  | 3.65                                                                                   | 48.4                                                                                          | 13.3                                                                                          | 13                                                                             | 13                                                                             | 2538    | 6396           | SEC13-like 1 (S. cerevisiae)                                                                 | Transporter activity                         | Endoplasmic reticulum             | Transport/cargo protein             | Transport                                                        | WD40                      | Yes                      |
| NTSC1B-RDH14 | 100526794 | NTSC1B-RDH14 protein isoform 1                                          | NP_001186032.1    | 2          | 1                 | 1          | 1      | 0.8                                                      | 0.99                                                     |                                                                                        |                                                                                        |                                                                                               |                                                                                               | 1                                                                              | 1                                                                              |         |                |                                                                                              |                                              |                                   |                                     |                                                                  |                           |                          |
| UBE3A        | 7337      | ubiquitin-protein ligase E3A isoform 2                                  | NP_000453.2       | 3          | 7                 | 7          | 21     | 0.8                                                      | 0.95                                                     | 6.72                                                                                   | 4.97                                                                                   | 17.1                                                                                          | 15                                                                                            | 10                                                                             | 10                                                                             | 3375    | 7337           | ubiquitin protein ligase E3A (human papillomavirus E6 associated protein, Angelman syndrome) | Ubiquitin-specific protease activity         | Cytoplasm                         | Ubiquitin proteasome system protein | Metabolism;Energy pathways                                       | HECT,CC                   | Yes                      |
| BCL2L13      | 23786     | bcl-2-like protein 13 isoform b                                         | NP_001257655.1    | 8          | 7                 | 7          | 12     | 0.8                                                      | 0.95                                                     | 9.08                                                                                   | 8.13                                                                                   | 20.7                                                                                          | 22                                                                                            | 8                                                                              | 8                                                                              | 9822    | 23786          | BCL2-like 13 (apoptosis facilitator)                                                         | Molecular function unknown                   | Mitochondrion                     | Integral membrane protein           | Apoptosis                                                        | CC,BCL,TM                 | Yes                      |
| GNAI3        | 2773      | guanine nucleotide-binding protein G(i) subunit alpha                   | NP_006487.1       | 8          | 6                 | 10         | 73     | 0.8                                                      | 0.95                                                     | 16.5                                                                                   | 7.46                                                                                   | 54.3                                                                                          | 27.9                                                                                          | 15                                                                             | 15                                                                             | 765     | 2773           | guanine nucleotide binding protein (G protein), alpha inhibiting activity polypeptide 3      | GTPase activity                              | Plasma membrane                   | G protein                           | Cell communication;Signal transduction                           | -                         | Yes                      |
| ELMO3        | 79767     | engulfment and cell motility protein 3                                  | NP_078988.2       | 1          | 9                 | 9          | 19     | 0.8                                                      | 0.93                                                     | 11.55                                                                                  | 6.19                                                                                   | 26.5                                                                                          | 17.4                                                                                          | 8                                                                              | 9                                                                              | 12104   | 79767          | engulfment and cell motility 3 (ced-12 homolog,C. elegans)                                   | Motor activity                               | -                                 | Motor protein                       | Cell growth and/or maintenance                                   | -                         | Yes                      |
| EMC4         | 51234     | ER membrane protein complex subunit 4 isoform a                         | NP_057538.1       | 2          | 3                 | 3          | 4      | 0.8                                                      | 0.93                                                     | 18.92                                                                                  | 3.59                                                                                   | 21.8                                                                                          | 4.7                                                                                           | 2                                                                              | 2                                                                              |         |                |                                                                                              |                                              |                                   |                                     |                                                                  |                           |                          |
| PLEC         | 5339      | plectin isoform 1c                                                      | NP_000436.2       | 16         | 1                 | 345        | 1360   | 0.8                                                      | 0.92                                                     |                                                                                        |                                                                                        |                                                                                               |                                                                                               | 1                                                                              | 1                                                                              |         |                |                                                                                              |                                              |                                   |                                     |                                                                  |                           |                          |
| ATP1B1       | 481       | sodium/potassium-transporting ATPase subunit beta-1                     | NP_001668.1       | 1          | 7                 | 7          | 25     | 0.8                                                      | 0.91                                                     | 5.58                                                                                   | 4.58                                                                                   | 16.9                                                                                          | 15.7                                                                                          | 14                                                                             | 14                                                                             | 1663    | 481            | ATPase, Na <sup>+</sup> /K <sup>+</sup> transporting, beta (polypeptide)                     | ATPase activity                              | Plasma membrane                   | ATPase                              | Transport                                                        | TM                        | No                       |
| GALNT3       | 2591      | polypeptide N-acetylgalactosaminyltransferase 3                         | NP_004473.2       | 2          | 8                 | 8          | 12     | 0.8                                                      | 0.91                                                     | 12.74                                                                                  | 14.3                                                                                   | 29.5                                                                                          | 38                                                                                            | 8                                                                              | 8                                                                              | 3453    | 2591           | UDP-N-acetyl-alpha-D-galactosaminopyridine-N-acetylgalactosaminyltransferase 3 (GalNAc-T3)   | Galactosyltransferase activity               | Golgi apparatus                   | Enzyme: Galactosyltransferase       | Protein metabolism                                               | TM,CC                     | Yes                      |
| LTA4H        | 4048      | leukotriene A-4 hydrolase isoform 1                                     | NP_000886.1       | 3          | 28                | 28         | 92     | 0.8                                                      | 0.89                                                     | 5.34                                                                                   | 5.52                                                                                   | 30.6                                                                                          | 35.5                                                                                          | 49                                                                             | 49                                                                             | 1056    | 4048           | leukotriene A4 hydrolase                                                                     | Hydrolase activity                           | Cytoplasm                         | Enzyme: Hydrolase                   | Protein metabolism                                               | -                         | Yes                      |
| PTRF         | 284119    | polymerase I and transcript release factor                              | NP_036364.2       | 1          | 17                | 17         | 110    | 0.8                                                      | 0.89                                                     | 7.4                                                                                    | 7.76                                                                                   | 46.5                                                                                          | 55.1                                                                                          | 56                                                                             | 56                                                                             | 4433    | 284119         | polymerase I and transcript release factor                                                   | Transcription regulator activity             | Nucleus;Cytoplasm                 | Transcription regulatory protein    | Regulation of nucleoside, nucleotide and nucleic acid metabolism | NLS,CC                    | Yes                      |
| FAM49B       | 51571     | protein FAM49B                                                          | NP_001243692.1    | 2          | 10                | 10         | 33     | 0.8                                                      | 0.88                                                     | 4.21                                                                                   | 3.68                                                                                   | 14                                                                                            | 13.4                                                                                          | 17                                                                             | 17                                                                             | 13313   | 51571          | family with sequence similarity 49, member B                                                 | Molecular function unknown                   | -                                 | Unclassified                        | Biological process unknown                                       | -                         | Yes                      |

Supplementary Table S1. List of quantified proteins in OKF6/TERT1-Smoke cells

| Gene Symbol | Gene ID | Protein Description                                                          | Protein Accession | # Proteins | # Unique Peptides | # Peptides | # PSMs | OKF6/TERT1-Smoke/<br>OKF6/TERT1-Parental<br>(130/126) R1 | OKF6/TERT1-Smoke/<br>OKF6/TERT1-Parental<br>(128/127) R2 | Ratio Standard Errors [%]:<br>OKF6/TERT1-Smoke/<br>OKF6/TERT1-Parental<br>(130/126) R1 | Ratio Standard Errors [%]:<br>OKF6/TERT1-Smoke/<br>OKF6/TERT1-Parental<br>(128/127) R2 | Ratio Variabilities [%]:<br>F13: OKF6/TERT1-<br>Smoke/<br>OKF6/TERT1-Parental<br>(130/126) R1 | Ratio Variabilities [%]:<br>F13: OKF6/TERT1-<br>Smoke/<br>OKF6/TERT1-Parental<br>(128/127) R2 | Ratio Counts: F13:<br>OKF6/TERT1-Smoke/<br>OKF6/TERT1-Parental<br>(130/126) R1 | Ratio Counts: F13:<br>OKF6/TERT1-Smoke/<br>OKF6/TERT1-Parental<br>(128/127) R2 | HPFD ID | Entrez Gene ID | Gene Name                                                                               | Molecular Function                                    | Primary Localization        | Molecular Class                  | Biological Process                                                             | Domains              | Plasma Proteome Database |
|-------------|---------|------------------------------------------------------------------------------|-------------------|------------|-------------------|------------|--------|----------------------------------------------------------|----------------------------------------------------------|----------------------------------------------------------------------------------------|----------------------------------------------------------------------------------------|-----------------------------------------------------------------------------------------------|-----------------------------------------------------------------------------------------------|--------------------------------------------------------------------------------|--------------------------------------------------------------------------------|---------|----------------|-----------------------------------------------------------------------------------------|-------------------------------------------------------|-----------------------------|----------------------------------|--------------------------------------------------------------------------------|----------------------|--------------------------|
| SLC25A11    | 8402    | mitochondrial 2-oxoglutarate/malate carrier protein isoform 1                | NP_003553.2       | 3          | 10                | 10         | 23     | 0.8                                                      | 0.88                                                     | 9.61                                                                                   | 6.49                                                                                   | 28.2                                                                                          | 20.8                                                                                          | 13                                                                             | 13                                                                             | 5003    | 8402           | solute carrier family 25 (mitochondrial carrier, oxoglutarate carrier), member 11       | Auxiliary transport protein activity                  | Mitochondrion               | Membrane transport protein       | Transport                                                                      | TM                   | Yes                      |
| TKFC        | 26007   | bifunctional ATP-dependent dihydroxyacetone kinase/FAD-AMP lyase (cyclizing) | NP_056348.2       | 2          | 7                 | 7          | 11     | 0.8                                                      | 0.86                                                     | 11.75                                                                                  | 5.07                                                                                   | 23.2                                                                                          | 10.6                                                                                          | 6                                                                              | 6                                                                              |         |                |                                                                                         |                                                       |                             |                                  |                                                                                |                      |                          |
| CHD1L       | 9557    | chromodomain-helicase-DNA-binding protein 1-like isoform 1                   | NP_004275.4       | 5          | 1                 | 1          | 1      | 0.8                                                      | 0.86                                                     |                                                                                        |                                                                                        |                                                                                               |                                                                                               | 1                                                                              | 1                                                                              | 9880    | 9557           | chromodomain helicase DNA binding protein-like                                          | DNA binding                                           | Nucleus                     | DNA binding protein              | Regulation of nucleobase, nucleotide and nucleic acid metabolism               | HELIC;DExDc;C C;A1pp | Yes                      |
| PRM2        | 5558    | DNA primase large subunit isoform a                                          | NP_000938.2       | 1          | 2                 | 2          | 3      | 0.8                                                      | 0.86                                                     |                                                                                        |                                                                                        |                                                                                               |                                                                                               | 1                                                                              | 1                                                                              | 8900    | 5558           | primase, polypeptide 2A, 58kDa                                                          | DNA-directed RNA polymerase activity                  | Nucleus                     | RNA polymerase                   | Regulation of nucleobase, nucleotide and nucleic acid metabolism               | -                    | Yes                      |
| UBXN6       | 80700   | UBX domain-containing protein 6 isoform 1                                    | NP_079517.1       | 2          | 3                 | 3          | 7      | 0.8                                                      | 0.84                                                     | 21.15                                                                                  | 8.03                                                                                   | 29.8                                                                                          | 11.7                                                                                          | 3                                                                              | 3                                                                              | 18253   | 80700          | UBX domain containing 1                                                                 | Molecular function unknown                            | Cytoplasm;Membrane fraction | Unclassified                     | Biological process unknown                                                     | PUG;UBX              | Yes                      |
| PML         | 5371    | protein PML isoform 1                                                        | NP_150241.2       | 9          | 24                | 24         | 55     | 0.8                                                      | 0.83                                                     | 4.45                                                                                   | 5.03                                                                                   | 20.5                                                                                          | 23.9                                                                                          | 32                                                                             | 32                                                                             | 23      | 5371           | promyelocytic leukemia                                                                  | Transcription regulator activity;Transporter activity | Nucleus;Cytoplasm           | Transcription regulatory protein | Regulation of gene expression, epigenetic                                      | RING;BBOX;CC;NLS;LZ  | Yes                      |
| PLOD1       | 5351    | procollagen-lysine,2-oxoglutarate 5-dioxygenase 1 precursor                  | NP_000293.2       | 1          | 16                | 17         | 58     | 0.8                                                      | 0.78                                                     | 3.58                                                                                   | 6.62                                                                                   | 13.5                                                                                          | 24.7                                                                                          | 22                                                                             | 22                                                                             | 1086    | 5351           | procollagen-lysine 1,2-oxoglutarate dioxygenase 1                                       | Catalytic activity                                    | Endoplasmic reticulum       | Enzyme: Hydroxylase              | Metabolism;Energy pathways                                                     | P4HC;SP              | Yes                      |
| BLVRA       | 644     | biliverdin reductase A precursor                                             | NP_001240752.1    | 1          | 11                | 11         | 30     | 0.8                                                      | 0.76                                                     | 4.15                                                                                   | 7.19                                                                                   | 14.9                                                                                          | 24.9                                                                                          | 20                                                                             | 20                                                                             | 11229   | 644            | biliverdin reductase A                                                                  | Oxidoreductase activity                               | Cytoplasm                   | Enzyme: Oxidoreductase           | Metabolism;Energy pathways                                                     | -                    | Yes                      |
| PARP4       | 143     | poly (ADP-ribose) polymerase 4                                               | NP_006428.2       | 1          | 15                | 15         | 32     | 0.8                                                      | 0.73                                                     | 4.94                                                                                   | 10.17                                                                                  | 16                                                                                            | 30.6                                                                                          | 16                                                                             | 16                                                                             | 9598    | 143            | poly (ADP-ribose) polymerase family, member 4                                           | Catalytic activity                                    | Nucleus                     | Enzyme: Ribosyltransferase       | Regulation of nucleobase, nucleotide and nucleic acid metabolism               | BRCT;VIT;VWA         | Yes                      |
| YWHAZ       | 7534    | 14-3-3 protein zeta/delta                                                    | NP_003397.1       | 1          | 15                | 19         | 196    | 0.8                                                      | 0.69                                                     | 4.22                                                                                   | 7.15                                                                                   | 29.6                                                                                          | 44.1                                                                                          | 73                                                                             | 73                                                                             | 3183    | 7534           | tyrosine 3-monooxygenase/tyrosophan5-monooxygenase activation protein, zeta polypeptide | Receptor signaling complex scaffold activity          | Cytoplasm                   | Adapter molecule                 | Regulation of cell cycle                                                       | CC                   | Yes                      |
| CDH13       | 1012    | cadherin-13 isoform 2                                                        | NP_001207417.1    | 5          | 3                 | 3          | 5      | 0.8                                                      | 0.66                                                     | 31.93                                                                                  | 36.42                                                                                  | 46.4                                                                                          | 43.5                                                                                          | 3                                                                              | 3                                                                              | 3219    | 1012           | cadherin 13, H-cadherin (heart)                                                         | Cell adhesion molecule activity                       | Plasma membrane             | Adhesion molecule                | Cell growth and/or maintenance                                                 | SP;Cadherin;GPI      | Yes                      |
| TACC2       | 10579   | transforming acidic coiled-coil-containing protein 2 isoform a               | NP_996744.3       | 8          | 1                 | 1          | 2      | 0.8                                                      | 0.66                                                     |                                                                                        |                                                                                        |                                                                                               |                                                                                               | 1                                                                              | 1                                                                              | 5600    | 10579          | transforming acidic coiled-coil containing protein 2                                    | Molecular function unknown                            | Centrosome                  | Cell cycle control protein       | Cell growth and/or maintenance                                                 | CC                   | Yes                      |
| S100A6      | 6277    | protein S100-A6                                                              | NP_055439.1       | 1          | 4                 | 4          | 12     | 0.8                                                      | 0.64                                                     | 42.36                                                                                  | 25.21                                                                                  | 87.5                                                                                          | 37.6                                                                                          | 5                                                                              | 5                                                                              | 237     | 6277           | S100 calcium binding protein A6 (calcyclin)                                             | Calcium ion binding                                   | Cytoplasm                   | Calcium binding protein          | Cell communication;Signal transduction                                         | EF_S_100             | Yes                      |
| S100A9      | 6280    | protein S100-A9                                                              | NP_002956.1       | 1          | 6                 | 6          | 15     | 0.8                                                      | 0.62                                                     | 5.79                                                                                   | 27.11                                                                                  | 13.1                                                                                          | 50.2                                                                                          | 8                                                                              | 8                                                                              | 472     | 6280           | S100 calcium binding protein A9 (calgranulinB)                                          | Calcium ion binding                                   | Cytoplasm                   | Calcium binding protein          | Cell communication;Signal transduction                                         | EF                   | Yes                      |
| NDUFB4      | 4710    | NADH dehydrogenase [ubiquinone] 1 beta subcomplex isoform 1                  | NP_004538.2       | 2          | 4                 | 4          | 12     | 0.8                                                      | 0.61                                                     | 2.04                                                                                   | 17.3                                                                                   | 4.3                                                                                           | 28.3                                                                                          | 7                                                                              | 7                                                                              | 11955   | 4710           | NADH dehydrogenase (ubiquinone) 1 beta subcomplex, 4, 15kDa                             | Oxidoreductase activity                               | Integral to membrane        | Enzyme: Oxidoreductase           | Metabolism;Energy pathways                                                     | TM                   | No                       |
| LSR         | 51599   | lipolysis-stimulated lipoprotein receptor isoform 2                          | NP_991403.1       | 5          | 3                 | 3          | 5      | 0.8                                                      | 0.56                                                     | 3.79                                                                                   | 67.84                                                                                  | 5.3                                                                                           | 72.8                                                                                          | 3                                                                              | 3                                                                              | 17283   | 51599          | None                                                                                    | Receptor activity                                     | Plasma membrane             | Integral membrane protein        | Lipoprotein metabolism                                                         | IG;TM                | No                       |
| PLSCR3      | 57048   | phospholipid scramblase 3                                                    | NP_065093.2       | 1          | 1                 | 1          | 3      | 0.79                                                     | 1.88                                                     |                                                                                        |                                                                                        |                                                                                               |                                                                                               | 1                                                                              | 1                                                                              | 7400    | 57048          | phospholipid scramblase 3                                                               | Transporter activity                                  | Mitochondrion               | Transport/cargo protein          | Transport                                                                      | -                    | Yes                      |
| PCBP2       | 5094    | poly(rC)-binding protein 2 isoform b                                         | NP_114366.1       | 8          | 1                 | 11         | 75     | 0.79                                                     | 1.7                                                      |                                                                                        |                                                                                        |                                                                                               |                                                                                               | 1                                                                              | 1                                                                              | 3129    | 5094           | poly(rC) binding protein 2                                                              | RNA binding;DNA binding                               | Nucleus                     | RNA binding protein              | Regulation of nucleobase, nucleotide and nucleic acid metabolism               | KH                   | Yes                      |
| HERC5       | 51191   | E3 ISG15-protein ligase HERC5                                                | NP_057407.2       | 1          | 1                 | 1          | 2      | 0.79                                                     | 1.69                                                     |                                                                                        |                                                                                        |                                                                                               |                                                                                               | 1                                                                              | 1                                                                              | 10502   | 51191          | hect domain and RLD 5                                                                   | Ligase activity                                       | Cytoplasm                   | Cell cycle control protein       | Cell communication;Signal transduction                                         | HECT                 | Yes                      |
| NAA35       | 60560   | N-alpha-acetyltransferase 35, NaC auxiliary subunit                          | NP_078911.3       | 1          | 4                 | 4          | 6      | 0.79                                                     | 1.27                                                     | 6.66                                                                                   | 8.94                                                                                   | 9.2                                                                                           | 19.9                                                                                          | 3                                                                              | 3                                                                              | 11291   | 60560          | MAK10 homolog, amino-acid N-acetyltransferase subunit, (S. cerevisiae)                  | Molecular function unknown                            | -                           | Unclassified                     | Cell growth and/or maintenance                                                 | -                    | Yes                      |
| SF3B6       | 51639   | splicing factor 3B subunit 6                                                 | NP_057131.1       | 1          | 3                 | 3          | 3      | 0.79                                                     | 1.2                                                      |                                                                                        |                                                                                        |                                                                                               |                                                                                               | 1                                                                              | 1                                                                              |         |                |                                                                                         |                                                       |                             |                                  |                                                                                |                      |                          |
| GM2A        | 2760    | ganglioside GM2 activator isoform 1 precursor                                | NP_000396.2       | 2          | 4                 | 4          | 12     | 0.79                                                     | 1.17                                                     | 6.01                                                                                   | 2.21                                                                                   | 11.7                                                                                          | 6.4                                                                                           | 6                                                                              | 6                                                                              | 2034    | 2760           | GM2 ganglioside activator                                                               | Transporter activity                                  | Lysosome                    | Transport/cargo protein          | Metabolism;Energy pathways                                                     | SP                   | Yes                      |
| SAR1B       | 51128   | GTP-binding protein SAR1b                                                    | NP_057187.1       | 1          | 3                 | 7          | 38     | 0.79                                                     | 1.15                                                     | 7.97                                                                                   | 19.92                                                                                  | 14.2                                                                                          | 48.3                                                                                          | 5                                                                              | 4                                                                              | 9647    | 51128          | SAR1a gene homolog 2 (S. cerevisiae)                                                    | GTPase activity                                       | Endoplasmic reticulum       | GTPase                           | Cell communication;Signal transduction                                         | -                    | Yes                      |
| ZNF207      | 7756    | BUB3-interacting and GLEBS motif-containing protein ZNF207 isoform c         | NP_001091977.1    | 3          | 2                 | 2          | 3      | 0.79                                                     | 1.14                                                     | 4.91                                                                                   | 17.59                                                                                  | 5.5                                                                                           | 29                                                                                            | 2                                                                              | 2                                                                              | 4576    | 7756           | zinc finger protein 207                                                                 | DNA binding;Transcription factor activity             | Nucleus                     | DNA binding protein              | Regulation of nucleobase, nucleotide and nucleic acid metabolism;Transcription | ZNFC2;NLS            | Yes                      |
| GPX8        | 493869  | probable glutathione peroxidase 8 isoform a                                  | NP_001008398.2    | 4          | 2                 | 2          | 4      | 0.79                                                     | 1.12                                                     | 17.68                                                                                  | 16.8                                                                                   | 19.9                                                                                          | 27.2                                                                                          | 2                                                                              | 2                                                                              | 17416   | 493869         | None                                                                                    | Molecular function unknown                            | Integral to membrane        | Unclassified                     | Biological process unknown                                                     | TM                   | No                       |

Supplementary Table S1. List of quantified proteins in OKF6/TERT1-Smoke cells  
 Raingopaln *et al.*, 2017. Role of protein kinase N2 (PKN2) in cigarette smoke-mediated oncogenic transformation of oral cells

| Gene Symbol | Gene ID | Protein Description                                                                         | Protein Accession | # Proteins | # Unique Peptides | # Peptides | # PSMs | OKF6/TERT1-Smoke/<br>OKF6/TERT1-Parental<br>(130/126) R1 | OKF6/TERT1-Smoke/<br>OKF6/TERT1-Parental<br>(128/127) R2 | Ratio Standard Errors [%]:<br>OKF6/TERT1-Smoke/<br>OKF6/TERT1-Parental<br>(130/126) R1 | Ratio Standard Errors [%]:<br>OKF6/TERT1-Smoke/<br>OKF6/TERT1-Parental<br>(128/127) R2 | Ratio Variabilities [%]:<br>F13: OKF6/TERT1-<br>Smoke/<br>OKF6/TERT1-Parental<br>(130/126) R1 | Ratio Variabilities [%]:<br>F13: OKF6/TERT1-<br>Smoke/<br>OKF6/TERT1-Parental<br>(128/127) R2 | Ratio Counts: F13:<br>OKF6/TERT1-Smoke/<br>OKF6/TERT1-Parental<br>(130/126) R1 | Ratio Counts: F13:<br>OKF6/TERT1-Smoke/<br>OKF6/TERT1-Parental<br>(128/127) R2 | HPRD ID | Entrez Gene Id | Gene Name                                                                  | Molecular Function                       | Primary Localization  | Molecular Class                 | Biological Process                                                                              | Domains                       | Plasma Proteome Database |
|-------------|---------|---------------------------------------------------------------------------------------------|-------------------|------------|-------------------|------------|--------|----------------------------------------------------------|----------------------------------------------------------|----------------------------------------------------------------------------------------|----------------------------------------------------------------------------------------|-----------------------------------------------------------------------------------------------|-----------------------------------------------------------------------------------------------|--------------------------------------------------------------------------------|--------------------------------------------------------------------------------|---------|----------------|----------------------------------------------------------------------------|------------------------------------------|-----------------------|---------------------------------|-------------------------------------------------------------------------------------------------|-------------------------------|--------------------------|
| OSBPL6      | 114880  | oxysterol-binding protein-related protein 6 isoform c                                       | NP_001188409.1    | 5          | 1                 | 2          | 3      | 0.79                                                     | 1.09                                                     |                                                                                        |                                                                                        |                                                                                               |                                                                                               | 1                                                                              | 1                                                                              | 9476    | 114880         | oxysterol binding protein-like 6                                           | Transporter activity;Lipid binding       | Cytoplasm             | Transport/cargo protein         | Transport;Lipid metabolism                                                                      | PH,CC                         | Yes                      |
| GPAM        | 57678   | glycerol-3-phosphate acyltransferase 1, mitochondrial precursor                             | NP_065949.3       | 1          | 1                 | 1          | 2      | 0.79                                                     | 1.08                                                     |                                                                                        |                                                                                        |                                                                                               |                                                                                               | 1                                                                              | 1                                                                              | 3865    | 57678          | glycerol-3-phosphate acyltransferase, mitochondrial                        | Acyltransferase activity                 | Mitochondrion         | Enzyme; Acyltransferase         | Metabolism;Energy pathways                                                                      | PISC                          | Yes                      |
| GPR108      | 56927   | protein GPR108 precursor                                                                    | NP_001073921.1    | 1          | 1                 | 1          | 2      | 0.79                                                     | 1.07                                                     |                                                                                        |                                                                                        |                                                                                               |                                                                                               | 1                                                                              | 1                                                                              | 18896   | 56927          | G protein-coupled receptor 108                                             | G-protein coupled receptor activity      | Integral to membrane  | G protein coupled receptor      | Signal transduction                                                                             | TM                            | Yes                      |
| NEK7        | 140609  | serine/threonine-protein kinase Nek7                                                        | NP_598001.1       | 1          | 1                 | 1          | 3      | 0.79                                                     | 1.07                                                     |                                                                                        |                                                                                        |                                                                                               |                                                                                               | 1                                                                              | 1                                                                              | 6027    | 140609         | NIMA (never in mitosis gene a)-related kinase 7                            | Protein serine/threonine kinase activity | Cytoplasm             | Serine/threonine kinase         | Cell communication;Signal transduction                                                          | S_T_kinase                    | Yes                      |
| PIK3CA      | 5290    | phosphatidylinositol 4,5-bisphosphate 3-kinase catalytic subunit alpha isoform              | NP_006209.2       | 1          | 1                 | 1          | 2      | 0.79                                                     | 1.05                                                     |                                                                                        |                                                                                        |                                                                                               |                                                                                               | 1                                                                              | 1                                                                              | 1382    | 5290           | phosphoinositide-3-kinase, catalytic, alphapolyptide                       | Lipid kinase activity                    | Plasma membrane       | Lipid Kinase                    | Cell communication;Signal transduction                                                          | C2;PI3KA;PI3KC;CC             | Yes                      |
| RPS16       | 6217    | 40S ribosomal protein S16                                                                   | NP_001011.1       | 1          | 15                | 15         | 58     | 0.79                                                     | 1.05                                                     | 9.99                                                                                   | 4.34                                                                                   | 44.7                                                                                          | 24.8                                                                                          | 29                                                                             | 29                                                                             | 4724    | 6217           | ribosomal protein S16                                                      | Structural constituent of ribosome       | Ribosome              | Ribosomal subunit               | Protein metabolism                                                                              | -                             | Yes                      |
| MICAL1      | 64780   | protein-methionine sulfoxide oxidase MICAL1 isoform 3                                       | NP_001273542.1    | 3          | 5                 | 5          | 8      | 0.79                                                     | 1                                                        | 1.69                                                                                   | 24.93                                                                                  | 2.7                                                                                           | 53.1                                                                                          | 4                                                                              | 4                                                                              | 6183    | 64780          | microtubule associated monooxygenase, calpainin LIM domain containing 1    | Structural constituent of cytoskeleton   | Cytoplasm             | Cytoskeletal protein            | Cell growth and/or maintenance                                                                  | CHLIM,CC                      | Yes                      |
| NTSC2       | 22978   | cytosolic purine 5'-nucleotidase                                                            | NP_036361.1       | 1          | 5                 | 5          | 7      | 0.79                                                     | 0.99                                                     | 22.43                                                                                  | 12.04                                                                                  | 41.2                                                                                          | 27.3                                                                                          | 5                                                                              | 5                                                                              | 2686    | 22978          | 5'-nucleotidase, cytosolic II                                              | Hydrolase activity                       | Cytoplasm             | Enzyme; Hydrolase               | Metabolism;Energy pathways                                                                      | -                             | Yes                      |
| ELP3        | 55140   | elongator complex protein 3 isoform 1                                                       | NP_060561.3       | 5          | 5                 | 5          | 12     | 0.79                                                     | 0.99                                                     | 1.05                                                                                   | 1.83                                                                                   | 1.9                                                                                           | 4.1                                                                                           | 5                                                                              | 5                                                                              | 10936   | 55140          | elongation protein 3 homolog (S. cerevisiae)                               | Acyltransferase activity                 | Nucleus               | Enzyme; Acyltransferase         | Metabolism;Energy pathways                                                                      | -                             | Yes                      |
| WDR75       | 84128   | WD repeat-containing protein 75 isoform 1                                                   | NP_115544.1       | 2          | 7                 | 7          | 11     | 0.79                                                     | 0.99                                                     | 9.12                                                                                   | 13.03                                                                                  | 17.7                                                                                          | 32.5                                                                                          | 6                                                                              | 6                                                                              | 7775    | 84128          | WD repeat domain 75                                                        | Molecular function unknown               | -                     | Unclassified                    | Cell communication                                                                              | WD40                          | No                       |
| TFCP2       | 7024    | alpha-globin transcription factor CP2 isoform 1                                             | NP_005644.2       | 3          | 3                 | 5          | 10     | 0.79                                                     | 0.93                                                     | 7.52                                                                                   | 5.78                                                                                   | 10.3                                                                                          | 9.3                                                                                           | 3                                                                              | 3                                                                              | 1790    | 7024           | transcription factor CP2                                                   | Transcription factor activity            | Nucleus               | Transcription factor            | Regulation of nucleobase, nucleoside, nucleotide and nucleic acid metabolism                    | -                             | Yes                      |
| PPP2R5E     | 5529    | serine/threonine-protein phosphatase 2A 56 kDa regulatory subunit epsilon isoform isoform a | NP_006237.1       | 3          | 5                 | 6          | 12     | 0.79                                                     | 0.93                                                     | 14.94                                                                                  | 12.76                                                                                  | 26.9                                                                                          | 27.1                                                                                          | 5                                                                              | 5                                                                              | 9040    | 5529           | protein phosphatase 2, regulatory subunit B (B56), epsilon isoform         | Molecular function unknown               | Cytoplasm             | Regulatory/other subunit        | Cell communication;Signal transduction                                                          | -                             | No                       |
| FAM208A     | 23272   | protein FAM208A isoform a                                                                   | NP_001106207.1    | 2          | 2                 | 2          | 4      | 0.79                                                     | 0.92                                                     | 29.9                                                                                   | 16.34                                                                                  | 34.3                                                                                          | 21.5                                                                                          | 2                                                                              | 2                                                                              |         |                |                                                                            |                                          |                       |                                 |                                                                                                 |                               |                          |
| AGK         | 55750   | acylglycerol kinase, mitochondrial precursor                                                | NP_060708.1       | 1          | 8                 | 8          | 16     | 0.79                                                     | 0.92                                                     | 8.01                                                                                   | 8.19                                                                                   | 19.1                                                                                          | 23                                                                                            | 9                                                                              | 9                                                                              | 8554    | 55750          | multiple substrate lipid kinase                                            | Lipid kinase activity                    | Integral to membrane  | Lipid Kinase                    | Cell communication;Signal transduction                                                          | DAGKC                         | No                       |
| HSDL1       | 83693   | inactive hydroxysteroid dehydrogenase-like protein 1 isoform a                              | NP_113651.4       | 2          | 2                 | 2          | 3      | 0.79                                                     | 0.9                                                      | 18.83                                                                                  | 3.62                                                                                   | 21.4                                                                                          | 4.6                                                                                           | 2                                                                              | 2                                                                              | 17117   | 83693          | hydroxysteroid dehydrogenase like 1                                        | Catalytic activity                       | -                     | Enzyme; Dehydrogenase           | Metabolism;Energy pathways                                                                      | -                             | No                       |
| NBEAL2      | 23218   | neurobeachin-like protein 2                                                                 | NP_055990.1       | 1          | 8                 | 8          | 15     | 0.79                                                     | 0.9                                                      | 6.89                                                                                   | 9.21                                                                                   | 16.4                                                                                          | 25.4                                                                                          | 9                                                                              | 9                                                                              | 11789   | 23218          | neurobeachin-like 2                                                        | Molecular function unknown               | -                     | Unclassified                    | Biological process unknown;Signal transduction                                                  | WD40                          | No                       |
| MAP2        | 4133    | microtubule-associated protein 2 isoform 1                                                  | NP_002365.3       | 4          | 4                 | 4          | 6      | 0.79                                                     | 0.9                                                      | 9.75                                                                                   | 1.17                                                                                   | 15.5                                                                                          | 2.1                                                                                           | 4                                                                              | 4                                                                              | 1140    | 4133           | microtubule-associated protein 2                                           | Cytoskeletal protein binding             | Cytoplasm;Nucleus     | Cytoskeletal associated protein | Cell growth and/or maintenance                                                                  | -                             | Yes                      |
| PRKCZ       | 5590    | protein kinase C zeta type isoform 1                                                        | NP_002735.3       | 3          | 1                 | 1          | 2      | 0.79                                                     | 0.89                                                     |                                                                                        |                                                                                        |                                                                                               |                                                                                               | 1                                                                              | 1                                                                              | 1504    | 5590           | protein kinase C, zeta                                                     | Protein serine/threonine kinase activity | Cytoplasm             | Serine/threonine kinase         | Anti-apoptosis;Signal transduction;Negative regulation of enzyme activity;Inflammatory response | PB1;C1;S_T_kinase;Tyr_Kinase  | Yes                      |
| PTPN11      | 5781    | tyrosine-protein phosphatase non-receptor type 11 isoform 1                                 | NP_002825.3       | 2          | 18                | 18         | 32     | 0.79                                                     | 0.88                                                     | 6.66                                                                                   | 12.5                                                                                   | 22                                                                                            | 47.8                                                                                          | 17                                                                             | 17                                                                             | 1470    | 5781           | protein tyrosine phosphatase, non-receptor type 11 (Noonan syndrome 1)     | Protein tyrosine phosphatase activity    | Cytoplasm             | Tyrosine phosphatase            | Cell communication;Signal transduction                                                          | SH2;Tyr_Phosph                | Yes                      |
| LGALS1      | 3956    | galectin-1                                                                                  | NP_002296.1       | 1          | 9                 | 9          | 50     | 0.79                                                     | 0.86                                                     | 4.25                                                                                   | 8.48                                                                                   | 17                                                                                            | 37.9                                                                                          | 25                                                                             | 25                                                                             | 1040    | 3956           | lectin, galactoside-binding, soluble, 1 (galactin 1)                       | Receptor binding                         | Extracellular         | Ligand                          | Immune response                                                                                 | -                             | Yes                      |
| NAPRT       | 93100   | nicotinate phosphoribosyltransferase isoform 1                                              | NP_660202.3       | 2          | 9                 | 9          | 27     | 0.79                                                     | 0.83                                                     | 12.14                                                                                  | 17.21                                                                                  | 38.4                                                                                          | 60.1                                                                                          | 15                                                                             | 15                                                                             |         |                |                                                                            |                                          |                       |                                 |                                                                                                 |                               |                          |
| PIGO        | 84720   | GPI ethanolamine phosphate transferase 3 isoform 1                                          | NP_116023.2       | 2          | 3                 | 3          | 6      | 0.79                                                     | 0.83                                                     | 9.24                                                                                   | 35.77                                                                                  | 12.7                                                                                          | 55.2                                                                                          | 3                                                                              | 3                                                                              | 15134   | 84720          | phosphatidylinositol glycan, class O                                       | Molecular function unknown               | Endoplasmic reticulum | Unclassified                    | Biological process unknown                                                                      | SP;TM                         | Yes                      |
| PGGT1B      | 5229    | geranylgeranyl transferase type-1 subunit beta                                              | NP_005014.2       | 1          | 2                 | 2          | 3      | 0.79                                                     | 0.83                                                     | 11.64                                                                                  | 10.33                                                                                  | 13.1                                                                                          | 12.2                                                                                          | 2                                                                              | 2                                                                              | 3612    | 5229           | protein geranylgeranyltransferase type 1, betasubunit                      | Transferase activity                     | -                     | Enzyme; Prenyltransferase       | Metabolism;Energy pathways                                                                      | -                             | Yes                      |
| AKAP1       | 8165    | A-kinase anchor protein 1, mitochondrial precursor                                          | NP_003479.1       | 1          | 2                 | 2          | 3      | 0.79                                                     | 0.83                                                     | 16.47                                                                                  | 15.03                                                                                  | 18.7                                                                                          | 17.8                                                                                          | 2                                                                              | 2                                                                              | 3905    | 8165           | A kinase (PKA) anchor protein 1                                            | Cytoskeletal anchoring activity          | Cytoplasm             | Anchor protein                  | Cell growth and/or maintenance                                                                  | TM;KH;TUDOR                   | Yes                      |
| PRRC2B      | 84726   | protein PRRC2B                                                                              | NP_037450.2       | 1          | 6                 | 8          | 13     | 0.79                                                     | 0.8                                                      | 14.36                                                                                  | 10.26                                                                                  | 25.9                                                                                          | 18.6                                                                                          | 5                                                                              | 5                                                                              |         |                |                                                                            |                                          |                       |                                 |                                                                                                 |                               |                          |
| LRP1        | 4035    | low-density lipoprotein receptor-related protein 1 precursor                                | NP_002323.2       | 1          | 10                | 10         | 21     | 0.79                                                     | 0.77                                                     | 11.79                                                                                  | 13.14                                                                                  | 31.5                                                                                          | 34.7                                                                                          | 11                                                                             | 11                                                                             | 138     | 4035           | low density lipoprotein-related protein 1 (alpha-2-macroglobulin receptor) | Receptor activity                        | Endoplasmic reticulum | Cell surface receptor           | Cell communication;Signal transduction                                                          | LDLR;EGF;EGFR;EPCAM;SP;TMDLLA | Yes                      |
| MYOIC       | 4641    | unconventional myosin-k isoform a                                                           | NP_001074248.1    | 3          | 30                | 30         | 109    | 0.79                                                     | 0.76                                                     | 3.74                                                                                   | 3.84                                                                                   | 23.1                                                                                          | 22.8                                                                                          | 59                                                                             | 59                                                                             | 9411    | 4641           | myosin IC                                                                  | Motor activity                           | Plasma membrane       | Motor protein                   | Cell growth and/or maintenance                                                                  | MYOSIN;IQ                     | Yes                      |

Supplementary Table S1. List of quantified proteins in OKF6/TERT1-Smoke cells  
 Raigopaln *et al.*, 2017. Role of protein kinase N2 (PKN2) in cigarette smoke-mediated oncogenic transformation of oral cells

| Gene Symbol | Gene ID | Protein Description                                                      | Protein Accession | # Proteins | # Unique Peptides | # Peptides | # PSMs | OKF6/TERT1-Smoke/<br>OKF6/TERT1-Parental<br>(130/126) R1 | OKF6/TERT1-Smoke/<br>OKF6/TERT1-Parental<br>(128/127) R2 | Ratio Standard Errors [%]:<br>OKF6/TERT1-Smoke/<br>OKF6/TERT1-Parental<br>(130/126) R1 | Ratio Standard Errors [%]:<br>OKF6/TERT1-Smoke/<br>OKF6/TERT1-Parental<br>(128/127) R2 | Ratio Variabilities [%]:<br>F13: OKF6/TERT1-<br>Smoke/<br>OKF6/TERT1-Parental<br>(130/126) R1 | Ratio Variabilities [%]:<br>F13: OKF6/TERT1-<br>Smoke/<br>OKF6/TERT1-Parental<br>(128/127) R2 | Ratio Counts: F13:<br>OKF6/TERT1-Smoke/<br>OKF6/TERT1-Parental<br>(130/126) R1 | Ratio Counts: F13:<br>OKF6/TERT1-Smoke/<br>OKF6/TERT1-Parental<br>(128/127) R2 | HPRD ID | Entrez Gene ID | Gene Name                                                                                             | Molecular Function                     | Primary Localization                    | Molecular Class                  | Biological Process                                                                                 | Domains            | Plasma Proteome Database |
|-------------|---------|--------------------------------------------------------------------------|-------------------|------------|-------------------|------------|--------|----------------------------------------------------------|----------------------------------------------------------|----------------------------------------------------------------------------------------|----------------------------------------------------------------------------------------|-----------------------------------------------------------------------------------------------|-----------------------------------------------------------------------------------------------|--------------------------------------------------------------------------------|--------------------------------------------------------------------------------|---------|----------------|-------------------------------------------------------------------------------------------------------|----------------------------------------|-----------------------------------------|----------------------------------|----------------------------------------------------------------------------------------------------|--------------------|--------------------------|
| MCM6        | 4175    | DNA replication licensing factor MCM6                                    | NP_005906.2       | 1          | 19                | 19         | 36     | 0.79                                                     | 0.76                                                     | 8.69                                                                                   | 8.79                                                                                   | 27.2                                                                                          | 26.4                                                                                          | 15                                                                             | 15                                                                             | 3485    | 4175           | MCM6 minichromosome maintenance deficient 6(MISS homolog, S. pombe) (S. cerevisiae)                   | Protein binding                        | Nucleus                                 | Cell cycle control protein       | Regulation of nucleoside, nucleotide and nucleic acid metabolism                                   | MCM                | Yes                      |
| LLGL1       | 3996    | lethal(2) giant larvae protein homolog 1                                 | NP_004131.3       | 1          | 8                 | 8          | 14     | 0.79                                                     | 0.74                                                     | 7.5                                                                                    | 12.78                                                                                  | 17.8                                                                                          | 29.1                                                                                          | 9                                                                              | 9                                                                              | 2982    | 3996           | lethal giant larvae homolog 1 (Drosophila)                                                            | Structural constituent of cytoskeleton | Cytoplasm;Plasma membrane;Cell junction | Cytoskeletal protein             | Cell growth and/or maintenance                                                                     | WD40               | No                       |
| STAT2       | 6773    | signal transducer and activator of transcription 2 isoform 1             | NP_005410.1       | 4          | 5                 | 5          | 17     | 0.79                                                     | 0.74                                                     | 6.86                                                                                   | 10.15                                                                                  | 14.4                                                                                          | 20.2                                                                                          | 7                                                                              | 7                                                                              | 2778    | 6773           | signal transducer and activator of transcription 2, 113kDa                                            | Transcription factor activity          | Cytoplasm                               | Transcription factor             | Regulation of nucleoside, nucleotide and nucleic acid metabolism                                   | SH2;CC             | Yes                      |
| IRF2BP2     | 359948  | interferon regulatory factor 2-binding protein 2 isoform A               | NP_892017.2       | 2          | 2                 | 2          | 3      | 0.79                                                     | 0.74                                                     | 28.36                                                                                  | 22.53                                                                                  | 32.6                                                                                          | 23.9                                                                                          | 2                                                                              | 2                                                                              | 17160   | 359948         | interferon regulatory factor 2 binding protein 2                                                      | Transcription regulator activity       | Nucleus                                 | Transcription regulatory protein | Regulation of nucleoside, nucleotide and nucleic acid metabolism                                   | ZFC3               | No                       |
| CMBL        | 134147  | carboxymethylchitinase homolog                                           | NP_620164.1       | 1          | 2                 | 2          | 6      | 0.79                                                     | 0.73                                                     | 1.64                                                                                   | 9.74                                                                                   | 2.2                                                                                           | 12.4                                                                                          | 3                                                                              | 3                                                                              | 14055   | 134147         | None                                                                                                  | Molecular function unknown             | -                                       | Unclassified                     | Biological process unknown                                                                         | -                  | No                       |
| PVRL1       | 5818    | nectin-1 isoform 1 precursor                                             | NP_002846.3       | 3          | 6                 | 6          | 7      | 0.79                                                     | 0.72                                                     | 1.44                                                                                   | 5.96                                                                                   | 2.3                                                                                           | 8.6                                                                                           | 4                                                                              | 4                                                                              | 7200    | 5818           | poliovirus receptor related 1 (herpesvirus entry mediator C; nectin)                                  | Cell adhesion molecule activity        | Cell junction                           | Immunoglobulin;Adhesion molecule | Immune response;Cell adhesion                                                                      | IGV;SP;TM;Ig_LI KE | Yes                      |
| ERAP1       | 51752   | endoplasmic reticulum aminopeptidase 1 isoform a precursor               | NP_057526.3       | 2          | 10                | 10         | 25     | 0.79                                                     | 0.72                                                     | 7.59                                                                                   | 9.22                                                                                   | 21.9                                                                                          | 24.4                                                                                          | 13                                                                             | 13                                                                             | 6015    | 51752          | None                                                                                                  | Aminopeptidase activity                | Endoplasmic reticulum                   | Aminopeptidase                   | Protein metabolism                                                                                 | SP                 | Yes                      |
| HIBCH       | 26275   | 3-hydroxyisobutyryl-CoA hydrolase, mitochondrial isoform 1 precursor     | NP_055177.2       | 2          | 3                 | 3          | 3      | 0.79                                                     | 0.71                                                     | 18.61                                                                                  | 12.4                                                                                   | 21.1                                                                                          | 12.6                                                                                          | 2                                                                              | 2                                                                              | 11023   | 26275          | 3-hydroxyisobutyryl Coenzyme A hydrolase                                                              | Hydrolase activity                     | Mitochondrion                           | Enzyme                           | Metabolism;Energy pathways                                                                         | -                  | No                       |
| HADH        | 3033    | hydroxyacyl-coenzyme A dehydrogenase, mitochondrial isoform 1 precursor  | NP_0011171634.2   | 2          | 6                 | 7          | 18     | 0.79                                                     | 0.67                                                     | 11.32                                                                                  | 21.27                                                                                  | 30.1                                                                                          | 50.1                                                                                          | 11                                                                             | 11                                                                             | 8372    | 3033           | L-3-hydroxyacyl-Coenzyme A dehydrogenase, short chain                                                 | Molecular function unknown             | Mitochondrion                           | Enzyme: Dehydrogenase            | Biological process unknown                                                                         | SP                 | Yes                      |
| C1orf123    | 54987   | UPF0587 protein C1orf123 isoform 1                                       | NP_060357.1       | 2          | 2                 | 2          | 2      | 0.79                                                     | 0.65                                                     |                                                                                        |                                                                                        |                                                                                               |                                                                                               | 1                                                                              | 1                                                                              | 7929    | 54987          | None                                                                                                  | Molecular function unknown             | -                                       | Unclassified                     | Biological process unknown                                                                         | -                  | No                       |
| SNCA        | 6622    | alpha-synuclein isoform NACP140                                          | NP_000336.1       | 3          | 7                 | 7          | 13     | 0.79                                                     | 0.63                                                     | 4.22                                                                                   | 12.69                                                                                  | 9.5                                                                                           | 23                                                                                            | 8                                                                              | 8                                                                              | 1227    | 6622           | synuclein, alpha (non A4 component of amyloid precursor)                                              | Chaperone activity                     | Cytoplasm                               | Chaperone                        | Protein metabolism                                                                                 | SYNUC              | Yes                      |
| SH3BGL3     | 83442   | SH3 domain-binding glutamic acid-rich-like protein 3                     | NP_112576.1       | 1          | 3                 | 3          | 6      | 0.79                                                     | 0.62                                                     | 12.2                                                                                   | 6.31                                                                                   | 19.5                                                                                          | 7.8                                                                                           | 4                                                                              | 4                                                                              | 15332   | 83442          | SH3 domain binding glutamic acid-rich protein like 3                                                  | Molecular function unknown             | Cytoplasm                               | Unclassified                     | Biological process unknown                                                                         | -                  | Yes                      |
| PPP3R1      | 5534    | calcineurin subunit B type 1                                             | NP_000936.1       | 1          | 2                 | 2          | 3      | 0.79                                                     | 0.57                                                     | 52.57                                                                                  | 116.3                                                                                  | 63.9                                                                                          | 117.2                                                                                         | 2                                                                              | 2                                                                              | 3195    | 5534           | protein phosphatase 3 (formerly 2B) regulatory subunit B, 19kDa alpha isoform (calcineurin B, type 1) | Phosphatase regulator activity         | Cytoplasm                               | Regulatory/other subunit         | Cell communication;Signal transduction                                                             | EF                 | Yes                      |
| SFT2D2      | 375035  | vesicle transport protein SFT2B                                          | NP_955376.1       | 1          | 2                 | 2          | 3      | 0.79                                                     | 0.51                                                     | 6.46                                                                                   | 90.44                                                                                  | 7.2                                                                                           | 73                                                                                            | 2                                                                              | 2                                                                              | 14192   | 375035         | None                                                                                                  | Molecular function unknown             | -                                       | Unclassified                     | Biological process unknown                                                                         | TM                 | No                       |
| ISOC2       | 79763   | isochorismatase domain-containing protein 2, mitochondrial isoform 2     | NP_078986.1       | 3          | 5                 | 5          | 13     | 0.78                                                     | 1.52                                                     | 16.53                                                                                  | 13.72                                                                                  | 32.5                                                                                          | 54.7                                                                                          | 6                                                                              | 6                                                                              | 8030    | 79763          | isochorismatase domain containing 2                                                                   | Molecular function unknown             | -                                       | Unclassified                     | Metabolism;Energy pathways                                                                         | -                  | Yes                      |
| CD81        | 975     | CD81 antigen isoform 1                                                   | NP_004347.1       | 2          | 3                 | 3          | 9      | 0.78                                                     | 1.44                                                     | 21.58                                                                                  | 11.74                                                                                  | 38.9                                                                                          | 39.1                                                                                          | 5                                                                              | 5                                                                              | 8924    | 975            | CD81 antigen (target of antiproliferative antibody 1)                                                 | Catalytic activity                     | Plasma membrane                         | Enzyme: Oxidase                  | Metabolism;Energy pathways                                                                         | TM                 | Yes                      |
| MTMR14      | 64419   | myotubularin-related protein 14 isoform 2                                | NP_001070993.1    | 3          | 1                 | 1          | 3      | 0.78                                                     | 1.37                                                     |                                                                                        |                                                                                        |                                                                                               |                                                                                               | 1                                                                              | 1                                                                              | 8654    | 64419          | None                                                                                                  | Lipid phosphatase activity             | Cytoplasm                               | Lipid phosphatase                | Phosphoinositide-mediated signaling;Lipid metabolism;Endosome transport;Vesicle-mediated transport | -                  | No                       |
| ADAM10      | 102     | disintegrin and metalloproteinase domain-containing protein 10 precursor | NP_001101.1       | 1          | 4                 | 4          | 5      | 0.78                                                     | 1.32                                                     | 0.85                                                                                   | 9.38                                                                                   | 1.2                                                                                           | 21.6                                                                                          | 3                                                                              | 3                                                                              | 3723    | 102            | a disintegrin and metalloproteinase domain 10                                                         | Metalloprotease activity               | Plasma membrane                         | Metalloprotease                  | Protein metabolism                                                                                 | TM;REP;DISNT;SP    | Yes                      |
| DYNLL1      | 8655    | dynein light chain 1, cytoplasmic                                        | NP_003737.1       | 1          | 4                 | 5          | 25     | 0.78                                                     | 1.25                                                     | 19.78                                                                                  | 26.6                                                                                   | 52.2                                                                                          | 141.3                                                                                         | 10                                                                             | 10                                                                             | 3334    | 8655           | dynein, cytoplasmic, light polypeptide 1                                                              | Motor activity                         | Cytoplasm                               | Motor protein                    | Cell growth and/or maintenance                                                                     | -                  | Yes                      |
| ABCB4       | 5244    | multidrug resistance protein 3 isoform B                                 | NP_061337.1       | 3          | 1                 | 1          | 1      | 0.78                                                     | 1.15                                                     |                                                                                        |                                                                                        |                                                                                               |                                                                                               | 1                                                                              | 1                                                                              | 1371    | 5244           | ATP-binding cassette, subfamily B (MDR/TAP), member 4                                                 | Transporter activity                   | Plasma membrane                         | Transport/cargo protein          | Transport                                                                                          | TM;AAA             | Yes                      |
| TMED1       | 11018   | transmembrane emp24 domain-containing protein 1 precursor                | NP_006849.1       | 1          | 2                 | 2          | 4      | 0.78                                                     | 1.14                                                     | 18.88                                                                                  | 4.9                                                                                    | 21.1                                                                                          | 7.9                                                                                           | 2                                                                              | 2                                                                              | 5653    | 11018          | transmembrane emp24 domain containing 1                                                               | Receptor binding                       | Plasma membrane                         | Ligand                           | Cell communication;Signal transduction                                                             | TM                 | No                       |
| LRWD1       | 222229  | leucine-rich repeat and WD repeat-containing protein 1                   | NP_690852.1       | 1          | 1                 | 1          | 2      | 0.78                                                     | 1.11                                                     |                                                                                        |                                                                                        |                                                                                               |                                                                                               | 1                                                                              | 1                                                                              | 10904   | 222229         | None                                                                                                  | Molecular function unknown             | Nucleus                                 | Unclassified                     | Biological process unknown                                                                         | LRR;WD40           | No                       |
| RPS27A      | 6233    | ubiquitin-40S ribosomal protein S27a precursor                           | NP_001129064.1    | 3          | 4                 | 11         | 86     | 0.78                                                     | 1.09                                                     | 11                                                                                     | 35.33                                                                                  | 26.3                                                                                          | 167.5                                                                                         | 9                                                                              | 9                                                                              | 1878    | 6233           | ribosomal protein S27a                                                                                | Ubiquitin-specific protease activity   | Ribosome                                | Ubiquitin proteasome system      | Protein metabolism                                                                                 | UBQ                | No                       |
| ZNF330      | 27309   | zinc finger protein 330 isoform 1                                        | NP_055302.1       | 1          | 1                 | 1          | 2      | 0.78                                                     | 1.09                                                     |                                                                                        |                                                                                        |                                                                                               |                                                                                               | 1                                                                              | 1                                                                              | 15775   | 27309          | zinc finger protein 330                                                                               | Molecular function unknown             | Nucleolus                               | Unclassified                     | Biological process unknown                                                                         | NLS;CXXC           | Yes                      |

Supplementary Table S1. List of quantified proteins in OKF6/TERT1-Smoke cells  
 Raigonalan *et al.*, 2017. Role of protein kinase N2 (PKN2) in cigarette smoke-mediated oncogenic transformation of oral cells

| Gene Symbol | Gene ID | Protein Description                                                                | Protein Accession | # Proteins | # Unique Peptides | # Peptides | # PSMs | OKF6/TERT1-Smoke/<br>OKF6/TERT1-Parental<br>(130/126) R1 | OKF6/TERT1-Smoke/<br>OKF6/TERT1-Parental<br>(128/127) R2 | Ratio Standard Errors [%]:<br>OKF6/TERT1-Smoke/<br>OKF6/TERT1-Parental<br>(130/126) R1 | Ratio Standard Errors [%]:<br>OKF6/TERT1-Smoke/<br>OKF6/TERT1-Parental<br>(128/127) R2 | Ratio Variabilities [%]:<br>F13: OKF6/TERT1-<br>Smoke/<br>OKF6/TERT1-Parental<br>(130/126) R1 | Ratio Variabilities [%]:<br>F13: OKF6/TERT1-<br>Smoke/<br>OKF6/TERT1-Parental<br>(128/127) R2 | Ratio Counts: F13:<br>OKF6/TERT1-Smoke/<br>OKF6/TERT1-Parental<br>(130/126) R1 | Ratio Counts: F13:<br>OKF6/TERT1-Smoke/<br>OKF6/TERT1-Parental<br>(128/127) R2 | HPRD ID | Entrez Gene ID | Gene Name                                                                     | Molecular Function                           | Primary Localization  | Molecular Class                   | Biological Process                                                              | Domains                       | Plasma Proteome Database |
|-------------|---------|------------------------------------------------------------------------------------|-------------------|------------|-------------------|------------|--------|----------------------------------------------------------|----------------------------------------------------------|----------------------------------------------------------------------------------------|----------------------------------------------------------------------------------------|-----------------------------------------------------------------------------------------------|-----------------------------------------------------------------------------------------------|--------------------------------------------------------------------------------|--------------------------------------------------------------------------------|---------|----------------|-------------------------------------------------------------------------------|----------------------------------------------|-----------------------|-----------------------------------|---------------------------------------------------------------------------------|-------------------------------|--------------------------|
| TMEM141     | 85014   | transmembrane protein 141                                                          | NP_116317.1       | 1          | 1                 | 1          | 1      | 0.78                                                     | 1.05                                                     |                                                                                        |                                                                                        |                                                                                               |                                                                                               | 1                                                                              | 1                                                                              | 17490   | 85014          | None                                                                          | Molecular function unknown                   | Integral to membrane  | Unclassified                      | Biological process unknown                                                      | TM                            | No                       |
| TBK1        | 29110   | serine/threonine-protein kinase TBK1                                               | NP_037386.1       | 1          | 1                 | 1          | 2      | 0.78                                                     | 1.05                                                     |                                                                                        |                                                                                        |                                                                                               |                                                                                               | 1                                                                              | 1                                                                              | 5322    | 29110          | TANK-binding kinase 1                                                         | Protein serine/threonine kinase activity     | Cytoplasm             | Serine/threonine kinase           | Cell communication;Signal transduction                                          | S_T_kinase                    | No                       |
| FLRT3       | 23767   | leucine-rich repeat transmembrane protein FLRT3 precursor                          | NP_938205.1       | 1          | 5                 | 5          | 7      | 0.78                                                     | 1.04                                                     | 26.43                                                                                  | 14.34                                                                                  | 43.1                                                                                          | 30.4                                                                                          | 4                                                                              | 4                                                                              | 5313    | 23767          | fibronectin leucine rich transmembrane protein3                               | Cell adhesion molecule activity              | Plasma membrane       | Adhesion molecule                 | Cell communication;Signal transduction                                          | SPLRR;TM                      | Yes                      |
| MCM3AP      | 8888    | germlinal-center associated nuclear protein                                        | NP_003897.2       | 1          | 3                 | 3          | 4      | 0.78                                                     | 1.04                                                     | 67.56                                                                                  | 5.53                                                                                   | 86.1                                                                                          | 8.1                                                                                           | 2                                                                              | 2                                                                              | 4483    | 8888           | MCM3 minichromosome maintenance deficient 3(S. cerevisiae) associated protein | Chromatin binding                            | Nucleus               | Cell cycle control protein        | Cell communication;Signal transduction                                          | CC                            | Yes                      |
| AAK1        | 22848   | AP2-associated protein kinase 1                                                    | NP_055726.3       | 1          | 6                 | 6          | 10     | 0.78                                                     | 1                                                        | 12.97                                                                                  | 17.07                                                                                  | 25.3                                                                                          | 43.9                                                                                          | 6                                                                              | 6                                                                              | 10620   | 22848          | AP2 associated kinase 1                                                       | Cytoskeletal protein binding                 | Cytoskeleton          | Cytoskeletal associated protein   | Transport                                                                       | S_T_Y_kinase                  | No                       |
| CDC42BPA    | 8476    | serine/threonine-protein kinase MRCK alpha isoform B                               | NP_003598.2       | 9          | 1                 | 3          | 6      | 0.78                                                     | 0.96                                                     |                                                                                        |                                                                                        |                                                                                               |                                                                                               | 1                                                                              | 1                                                                              | 4562    | 8476           | CDC42 binding protein kinase alpha(DMPK-like)                                 | Protein serine/threonine kinase activity     | Cell junction         | Serine/threonine kinase           | Cell communication;Signal transduction;Cytoskeleton organization and biogenesis | S_T_kinase;CC;C1;PH3;CNHL;PBD | Yes                      |
| HS1BP3      | 64342   | HCLS1-binding protein 3                                                            | NP_071905.3       | 1          | 4                 | 4          | 12     | 0.78                                                     | 0.95                                                     | 27.33                                                                                  | 31.05                                                                                  | 55.7                                                                                          | 83                                                                                            | 6                                                                              | 6                                                                              | 13357   | 64342          | None                                                                          | Molecular function unknown                   | -                     | Unclassified                      | Biological process unknown                                                      | PX                            | No                       |
| FLNA        | 2316    | filamin A isoform 2                                                                | NP_001104026.1    | 2          | 126               | 138        | 957    | 0.78                                                     | 0.94                                                     | 2.1                                                                                    | 1.59                                                                                   | 34.8                                                                                          | 31.5                                                                                          | 421                                                                            | 422                                                                            | 2060    | 2316           | filamin A, alpha (actin binding protein 280)                                  | Cytoskeletal anchoring activity              | Cytoplasm             | Anchor protein;Structural protein | Cell growth and/or maintenance                                                  | CH;K;FLMN                     | Yes                      |
| FAF1        | 11124   | FAS-associated factor 1                                                            | NP_008982.1       | 1          | 6                 | 6          | 11     | 0.78                                                     | 0.94                                                     | 19.94                                                                                  | 9.97                                                                                   | 35.6                                                                                          | 21.1                                                                                          | 5                                                                              | 5                                                                              | 5124    | 11124          | Fas (TNFRSF6) associated factor 1                                             | Receptor signaling complex scaffold activity | Cytoplasm             | Adapter molecule                  | Apoptosis                                                                       | UBX;CC                        | Yes                      |
| SIRPA       | 140885  | tyrosine-protein phosphatase non-receptor type substrate 1 precursor               | NP_001035111.1    | 2          | 1                 | 1          | 1      | 0.78                                                     | 0.94                                                     |                                                                                        |                                                                                        |                                                                                               |                                                                                               | 1                                                                              | 1                                                                              | 3912    | 140885         | protein tyrosine phosphatase, non-receptor type substrate 1                   | Receptor activity                            | Plasma membrane       | Cell surface receptor             | Cell communication;Signal transduction                                          | SP;TM;IGC;Ig_LI;KE            | Yes                      |
| MRPL18      | 29074   | 39S ribosomal protein L18, mitochondrial                                           | NP_054880.2       | 1          | 1                 | 1          | 1      | 0.78                                                     | 0.94                                                     |                                                                                        |                                                                                        |                                                                                               |                                                                                               | 1                                                                              | 1                                                                              | 14744   | 29074          | mitochondrial ribosomal protein L18                                           | Structural constituent of ribosome           | Mitochondrion         | Ribosomal subunit                 | Protein metabolism                                                              | -                             | No                       |
| TAPBP       | 6892    | tapasin isoform 2 precursor                                                        | NP_757345.2       | 2          | 3                 | 3          | 7      | 0.78                                                     | 0.93                                                     | 14.1                                                                                   | 23.31                                                                                  | 22.2                                                                                          | 45.5                                                                                          | 4                                                                              | 4                                                                              | 9061    | 6892           | TAP binding protein (tapasin)                                                 | Chaperone activity                           | Endoplasmic reticulum | Chaperone                         | Protein folding                                                                 | Ig_LIKE;TM;SP                 | Yes                      |
| RTKN        | 6242    | thotekin isoform a                                                                 | NP_001015055.1    | 3          | 8                 | 8          | 21     | 0.78                                                     | 0.93                                                     | 19.06                                                                                  | 8.06                                                                                   | 52.3                                                                                          | 24                                                                                            | 11                                                                             | 10                                                                             | 3795    | 6242           | thotekin                                                                      | Transcription regulator activity             | Cytoplasm             | Transcription regulatory protein  | Cell communication;Signal transduction                                          | HRI;PH                        | No                       |
| SH3BP4      | 23677   | SH3 domain-binding protein 4                                                       | NP_055336.1       | 1          | 4                 | 4          | 6      | 0.78                                                     | 0.91                                                     | 7.98                                                                                   | 21.36                                                                                  | 12.5                                                                                          | 40.5                                                                                          | 4                                                                              | 4                                                                              | 9285    | 23677          | SH3-domain binding protein 4                                                  | Receptor signaling complex scaffold activity | -                     | Adapter molecule                  | Cell communication;Signal transduction                                          | SH3                           | No                       |
| ZNF385A     | 25946   | zinc finger protein 385A isoform a                                                 | NP_001124439.1    | 4          | 1                 | 1          | 1      | 0.78                                                     | 0.88                                                     |                                                                                        |                                                                                        |                                                                                               |                                                                                               | 1                                                                              | 1                                                                              | 16448   | 25946          | zinc finger protein 385                                                       | Transcription factor activity                | Nucleolus             | Transcription factor              | Regulation of nucleobase, nucleoside, nucleotide and nucleic acid metabolism    | ZNF;C2;NLS                    | Yes                      |
| IFI5        | 3430    | interferon-induced 35 kDa protein                                                  | NP_005524.2       | 1          | 1                 | 1          | 1      | 0.78                                                     | 0.87                                                     |                                                                                        |                                                                                        |                                                                                               |                                                                                               | 1                                                                              | 1                                                                              | 2844    | 3430           | interferon-induced protein 35                                                 | Molecular function unknown                   | Cytoplasm             | Unclassified                      | Immune response                                                                 | LZ                            | Yes                      |
| TBPL1       | 9519    | TATA box-binding protein-like protein 1                                            | NP_001240605.1    | 1          | 1                 | 1          | 1      | 0.78                                                     | 0.86                                                     |                                                                                        |                                                                                        |                                                                                               |                                                                                               | 1                                                                              | 1                                                                              | 9272    | 9519           | TBP-like 1                                                                    | Transcription factor activity                | Nucleus               | Transcription factor              | Regulation of nucleobase, nucleoside, nucleotide and nucleic acid metabolism    | -                             | Yes                      |
| TRIM26      | 7726    | tripartite motif-containing protein 26                                             | NP_003440.1       | 1          | 2                 | 2          | 6      | 0.78                                                     | 0.85                                                     | 6.21                                                                                   | 0.65                                                                                   | 6.9                                                                                           | 0.8                                                                                           | 2                                                                              | 2                                                                              | 2901    | 7726           | tripartite motif-containing 26                                                | DNA binding                                  | Nucleus               | DNA binding protein               | Biological process unknown                                                      | RING;BBOX;PRY;SPRY;CC         | Yes                      |
| SLC12A4     | 6560    | solute carrier family 12 member 4 isoform a                                        | NP_005063.1       | 10         | 4                 | 4          | 12     | 0.78                                                     | 0.85                                                     | 8.37                                                                                   | 15.97                                                                                  | 14.6                                                                                          | 31                                                                                            | 5                                                                              | 5                                                                              | 4987    | 6560           | solute carrier family 12 (potassium/chloride cotransporters), member 4        | Ion transporter activity                     | Plasma membrane       | Integral membrane protein         | Transport                                                                       | TM                            | Yes                      |
| PARL        | 55486   | presenilin-associated rhomboid-like protein, mitochondrial isoform 1 preproprotein | NP_061092.3       | 2          | 1                 | 1          | 1      | 0.78                                                     | 0.85                                                     |                                                                                        |                                                                                        |                                                                                               |                                                                                               | 1                                                                              | 1                                                                              | 8484    | 55486          | presenilin associated, rhomboid-like                                          | Metalloprotease activity                     | Mitochondrion         | Metallo protease                  | Protein metabolism                                                              | TM                            | No                       |
| SLFN5       | 162394  | schlafen family member 5                                                           | NP_659412.3       | 3          | 12                | 14         | 26     | 0.78                                                     | 0.84                                                     | 6.12                                                                                   | 3.85                                                                                   | 17.3                                                                                          | 11.8                                                                                          | 13                                                                             | 13                                                                             | 17519   | 162394         | None                                                                          | Molecular function unknown                   | -                     | Unclassified                      | Biological process unknown                                                      | -                             | No                       |
| FAM83H      | 286077  | protein FAM83H                                                                     | NP_940890.3       | 1          | 26                | 26         | 56     | 0.78                                                     | 0.83                                                     | 7.7                                                                                    | 10.73                                                                                  | 33.2                                                                                          | 49.6                                                                                          | 29                                                                             | 28                                                                             | 13521   | 286077         | None                                                                          | Molecular function unknown                   | Nucleus               | Unclassified                      | Biological process unknown                                                      | CC                            | No                       |
| KDM5B       | 10765   | lysine-specific demethylase 5B                                                     | NP_006609.3       | 1          | 4                 | 4          | 5      | 0.78                                                     | 0.82                                                     | 20.17                                                                                  | 57.81                                                                                  | 27.9                                                                                          | 97.5                                                                                          | 3                                                                              | 3                                                                              | 9251    | 10765          | Jumonji, AT rich interactive domain 1B(RBP2-like)                             | Transcription regulator activity             | Nucleus               | Transcription regulatory protein  | Regulation of nucleobase, nucleoside, nucleotide and nucleic acid metabolism    | BRIGHT;PHD;JMJC;JugN          | Yes                      |
| PDCD6IP     | 10015   | programmed cell death 6-interacting protein isoform 1                              | NP_037506.2       | 3          | 36                | 36         | 128    | 0.78                                                     | 0.8                                                      | 3.55                                                                                   | 3.37                                                                                   | 22.8                                                                                          | 21.9                                                                                          | 66                                                                             | 65                                                                             | 6425    | 10015          | programmed cell death 6 interacting protein                                   | Molecular function unknown                   | Cytoplasm             | Unclassified                      | Apoptosis                                                                       | CC                            | Yes                      |
| KIAA1033    | 23325   | WASH complex subunit 7 isoform 1                                                   | NP_001280569.1    | 2          | 8                 | 9          | 17     | 0.78                                                     | 0.8                                                      | 6.96                                                                                   | 14.46                                                                                  | 16.5                                                                                          | 35.6                                                                                          | 9                                                                              | 9                                                                              | 13829   | 23325          | KIAA1033                                                                      | Molecular function unknown                   | -                     | Unclassified                      | Biological process unknown                                                      | CC                            | No                       |
| CPT2        | 1376    | carnitine O-palmitoyltransferase 2, mitochondrial precursor                        | NP_000089.1       | 1          | 7                 | 7          | 16     | 0.78                                                     | 0.77                                                     | 7.96                                                                                   | 13.32                                                                                  | 17.7                                                                                          | 29.7                                                                                          | 8                                                                              | 8                                                                              | 2802    | 1376           | carnitine palmitoyltransferase II                                             | Palmitoyltransferase activity                | Mitochondrion         | Enzyme;Palmitoyltransferase       | Metabolism;Energy pathways                                                      | -                             | Yes                      |

Supplementary Table S1. List of quantified proteins in OKF6/TERT1-Smoke cells  
 Raingonalan *et al.*, 2017. Role of protein kinase N2 (PKN2) in cigarette smoke-mediated oncogenic transformation of oral cells

| Gene Symbol | Gene ID | Protein Description                                                            | Protein Accession | # Proteins | # Unique Peptides | # Peptides | # PSMs | OKF6/TERT1-Smoke/<br>OKF6/TERT1-Parental<br>(130/126) R1 | OKF6/TERT1-Smoke/<br>OKF6/TERT1-Parental<br>(128/127) R2 | Ratio Standard Errors [%]:<br>OKF6/TERT1-Smoke/<br>OKF6/TERT1-Parental<br>(130/126) R1 | Ratio Standard Errors [%]:<br>OKF6/TERT1-Smoke/<br>OKF6/TERT1-Parental<br>(128/127) R2 | Ratio Variabilities [%]:<br>F13: OKF6/TERT1-<br>Smoke/<br>OKF6/TERT1-Parental<br>(130/126) R1 | Ratio Variabilities [%]:<br>F13: OKF6/TERT1-<br>Smoke/<br>OKF6/TERT1-Parental<br>(128/127) R2 | Ratio Counts: F13:<br>OKF6/TERT1-Smoke/<br>OKF6/TERT1-Parental<br>(130/126) R1 | Ratio Counts: F13:<br>OKF6/TERT1-Smoke/<br>OKF6/TERT1-Parental<br>(128/127) R2 | HPRD ID | Entrez Gene Id | Gene Name                                                                                | Molecular Function                           | Primary Localization            | Molecular Class                     | Biological Process                                                           | Domains                      | Plasma Proteome Database |
|-------------|---------|--------------------------------------------------------------------------------|-------------------|------------|-------------------|------------|--------|----------------------------------------------------------|----------------------------------------------------------|----------------------------------------------------------------------------------------|----------------------------------------------------------------------------------------|-----------------------------------------------------------------------------------------------|-----------------------------------------------------------------------------------------------|--------------------------------------------------------------------------------|--------------------------------------------------------------------------------|---------|----------------|------------------------------------------------------------------------------------------|----------------------------------------------|---------------------------------|-------------------------------------|------------------------------------------------------------------------------|------------------------------|--------------------------|
| BASP1       | 10409   | brain acid soluble protein 1                                                   | NP_006308.3       | 1          | 15                | 15         | 61     | 0.78                                                     | 0.76                                                     | 6.19                                                                                   | 6.15                                                                                   | 28.3                                                                                          | 27.2                                                                                          | 33                                                                             | 33                                                                             | 8389    | 10409          | brain abundant, membrane attached signalprotein 1                                        | Transcription regulator activity             | Nucleus                         | Transcription regulatory protein    | Regulation of nucleobase, nucleoside, nucleotide and nucleic acid metabolism | -                            | Yes                      |
| NID2        | 22795   | nidogen-2 precursor                                                            | NP_031387.3       | 2          | 1                 | 1          | 2      | 0.78                                                     | 0.75                                                     |                                                                                        |                                                                                        |                                                                                               |                                                                                               | 1                                                                              | 1                                                                              | 5654    | 22795          | nidogen 2 (osteonidogen)                                                                 | Extracellular matrix structural constituent  | Extracellular                   | Extracellular matrix protein        | Cell growth and/or maintenance                                               | NIDO2;EGFC A;THYRO;LDLR B;SP | Yes                      |
| DPM3        | 54344   | dolichol phosphate mannosyltransferase subunit 3 isoform 1                     | NP_061846.2       | 2          | 1                 | 1          | 4      | 0.78                                                     | 0.73                                                     | 24.07                                                                                  | 7.14                                                                                   | 26.9                                                                                          | 7.3                                                                                           | 2                                                                              | 2                                                                              | 16179   | 54344          | dolichyl-phosphate mannosyltransferase polypeptide 3                                     | Catalytic activity                           | Endoplasmic reticulum           | Enzyme: Synthase                    | Metabolism                                                                   | TM                           | No                       |
| SEC14L1     | 6397    | SEC14-like protein 1 isoform b                                                 | NP_001191337.1    | 3          | 1                 | 1          | 2      | 0.78                                                     | 0.71                                                     |                                                                                        |                                                                                        |                                                                                               |                                                                                               | 1                                                                              | 1                                                                              | 3295    | 6397           | SEC14-like 1 (S. cerevisiae)                                                             | Transporter activity                         | Golgi apparatus                 | Transport/cargo protein             | Transport                                                                    | SEC14                        | Yes                      |
| STX7        | 8417    | syntaxin-7                                                                     | NP_003560.2       | 1          | 7                 | 7          | 27     | 0.78                                                     | 0.71                                                     | 12.41                                                                                  | 6.18                                                                                   | 33.1                                                                                          | 14.7                                                                                          | 11                                                                             | 11                                                                             | 4449    | 8417           | syntaxin 7                                                                               | Protein binding                              | Endosome                        | Integral membrane protein           | Transport                                                                    | SynN;TM;CC                   | Yes                      |
| COQ6        | 51004   | ubiquinone biosynthesis monooxygenase COQ6, mitochondrial isoform a            | NP_872282.1       | 2          | 1                 | 1          | 1      | 0.78                                                     | 0.69                                                     |                                                                                        |                                                                                        |                                                                                               |                                                                                               | 1                                                                              | 1                                                                              | 16742   | 51004          | coenzyme Q6 homolog (yeast)                                                              | FAD binding                                  | -                               | Unclassified                        | Metabolism                                                                   | -                            | Yes                      |
| ATL3        | 25923   | atlastin-3 isoform 1                                                           | NP_056274.3       | 2          | 15                | 15         | 42     | 0.78                                                     | 0.68                                                     | 5.42                                                                                   | 7.94                                                                                   | 20.5                                                                                          | 26.2                                                                                          | 23                                                                             | 23                                                                             | 13170   | 25923          | None                                                                                     | Molecular function unknown                   | Mitochondrion                   | Unclassified                        | Immune response                                                              | -                            | No                       |
| ANTXR2      | 118429  | anthrax toxin receptor 2 isoform 2 precursor                                   | NP_001139266.1    | 3          | 1                 | 1          | 1      | 0.78                                                     | 0.66                                                     |                                                                                        |                                                                                        |                                                                                               |                                                                                               | 1                                                                              | 1                                                                              | 7452    | 118429         | anthrax toxin receptor 2                                                                 | Cytoskeletal protein binding                 | Endoplasmic reticulum           | Cytoskeletal associated protein     | Cell growth and/or maintenance                                               | SP;VWA;TM                    | Yes                      |
| DEF6        | 50619   | differentially expressed in FDCP 6 homolog                                     | NP_071330.3       | 1          | 2                 | 2          | 3      | 0.78                                                     | 0.63                                                     | 20.4                                                                                   | 42.29                                                                                  | 22.8                                                                                          | 38.8                                                                                          | 2                                                                              | 2                                                                              | 10869   | 50619          | differentially expressed in FDCP 6 homolog(mouse)                                        | Guanyl-nucleotide exchange factor activity   | Cytoplasm                       | Guanine nucleotide exchange factor  | Cell communication;Signal transduction                                       | PH;CC                        | No                       |
| ENDOD1      | 23052   | endonuclease domain-containing 1 protein precursor                             | NP_055851.1       | 1          | 8                 | 8          | 22     | 0.78                                                     | 0.63                                                     | 9.01                                                                                   | 33.9                                                                                   | 20                                                                                            | 65.8                                                                                          | 8                                                                              | 8                                                                              | 13819   | 23052          | None                                                                                     | Molecular function unknown                   | -                               | Unclassified                        | Regulation of nucleobase, nucleoside, nucleotide and nucleic acid metabolism | SP;Endonuclease;TM           | Yes                      |
| LCLAT1      | 253558  | lysocardiolipin acyltransferase 1 isoform 1                                    | NP_872357.2       | 3          | 1                 | 1          | 1      | 0.78                                                     | 0.61                                                     |                                                                                        |                                                                                        |                                                                                               |                                                                                               | 1                                                                              | 1                                                                              | 17458   | 253558         | lysocardiolipin acyltransferase                                                          | Acyltransferase activity                     | Endoplasmic reticulum           | Enzyme: Acyltransferase             | Metabolism                                                                   | TM;PISC;SP                   | No                       |
| CLN5        | 1203    | ceroid-lipofuscinosis neuronal protein 5                                       | NP_006484.1       | 1          | 3                 | 3          | 5      | 0.78                                                     | 0.6                                                      | 24.82                                                                                  | 10.87                                                                                  | 34.4                                                                                          | 11.4                                                                                          | 3                                                                              | 3                                                                              | 7619    | 1203           | ceroid-lipofuscinosis, neuronal 5                                                        | Molecular function unknown                   | Lysosome                        | Unclassified                        | Biological process unknown                                                   | TM                           | Yes                      |
| EGLN1       | 54583   | egl nine homolog 1                                                             | NP_071334.1       | 3          | 1                 | 1          | 2      | 0.77                                                     | 1.43                                                     |                                                                                        |                                                                                        |                                                                                               |                                                                                               | 1                                                                              | 1                                                                              | 6971    | 54583          | egl nine homolog 1 (C. elegans)                                                          | Ubiquitin-specific protease activity         | Cytoplasm                       | Ubiquitin proteasome system protein | Protein metabolism                                                           | PHC                          | Yes                      |
| EPN3        | 55040   | epsin-3                                                                        | NP_060427.2       | 1          | 2                 | 4          | 6      | 0.77                                                     | 1.17                                                     |                                                                                        |                                                                                        |                                                                                               |                                                                                               | 1                                                                              | 1                                                                              | 6272    | 55040          | epsin 3                                                                                  | Molecular function unknown                   | Extracellular                   | Unclassified                        | Biological process unknown                                                   | UIM                          | Yes                      |
| DGAT1       | 8694    | diacylglycerol O-acyltransferase 1                                             | NP_036211.2       | 1          | 2                 | 2          | 4      | 0.77                                                     | 1.12                                                     | 10.41                                                                                  | 3.85                                                                                   | 14                                                                                            | 7.5                                                                                           | 3                                                                              | 3                                                                              | 5360    | 8694           | diacylglycerol O-acyltransferase homolog 1(mouse)                                        | Acyltransferase activity                     | Endoplasmic reticulum           | Enzyme: Acyltransferase             | Metabolism;Energy pathways                                                   | TM                           | Yes                      |
| SRPX        | 8406    | sushi repeat-containing protein SRPX isoform 1 precursor                       | NP_006298.1       | 4          | 3                 | 3          | 3      | 0.77                                                     | 1.08                                                     | 3.94                                                                                   | 12.9                                                                                   | 5.2                                                                                           | 24.4                                                                                          | 3                                                                              | 3                                                                              | 2175    | 8406           | sushi-repeat-containing protein X-linked                                                 | Molecular function unknown                   | Plasma membrane                 | Unclassified                        | Biological process unknown                                                   | SP;SUSHI                     | Yes                      |
| CDS2        | 8760    | phosphatidate cytidylyltransferase 2                                           | NP_003809.1       | 1          | 1                 | 1          | 2      | 0.77                                                     | 1.08                                                     |                                                                                        |                                                                                        |                                                                                               |                                                                                               | 1                                                                              | 1                                                                              | 9150    | 8760           | CDP-diacylglycerol synthase (phosphatidatecytidylyltransferase) 2                        | Nucleotidyltransferase activity              | Mitochondrion;Nucleus;Cytoplasm | Enzyme: Nucleotidyltransferase      | Metabolism;Energy pathways                                                   | TM                           | Yes                      |
| TAGLN2      | 8407    | transgelin-2 isoform a                                                         | NP_001264153.1    | 3          | 11                | 11         | 51     | 0.77                                                     | 1.07                                                     | 5.14                                                                                   | 7.21                                                                                   | 20.4                                                                                          | 40.9                                                                                          | 26                                                                             | 26                                                                             | 6864    | 8407           | transgelin 2                                                                             | Molecular function unknown                   | -                               | Unclassified                        | Biological process unknown                                                   | CH                           | Yes                      |
| YWHAQ       | 10971   | 14-3-3 protein theta                                                           | NP_006817.1       | 1          | 11                | 16         | 150    | 0.77                                                     | 1.03                                                     | 10.99                                                                                  | 7.58                                                                                   | 54                                                                                            | 48.8                                                                                          | 36                                                                             | 35                                                                             | 886     | 10971          | tyrosine 3-monooxygenase/tyrosophan5-monooxygenase activation protein, theta polypeptide | Receptor signaling complex scaffold activity | Cytoplasm                       | Adapter molecule                    | Cell communication;Signal transduction                                       | -                            | Yes                      |
| VPS51       | 738     | vacuolar protein sorting-associated protein 51 homolog                         | NP_037397.2       | 1          | 5                 | 5          | 10     | 0.77                                                     | 1                                                        | 17.64                                                                                  | 6.53                                                                                   | 27.8                                                                                          | 13.1                                                                                          | 4                                                                              | 4                                                                              |         |                |                                                                                          |                                              |                                 |                                     |                                                                              |                              |                          |
| MCM4        | 4173    | DNA replication licensing factor MCM4                                          | NP_005905.2       | 1          | 17                | 17         | 39     | 0.77                                                     | 1                                                        | 6.21                                                                                   | 8.14                                                                                   | 21.7                                                                                          | 37.7                                                                                          | 20                                                                             | 20                                                                             | 9094    | 4173           | MCM4 minichromosome maintenance deficient 4 (S.cerevisiae)                               | DNA binding                                  | Nucleus                         | DNA binding protein                 | Regulation of nucleobase, nucleoside, nucleotide and nucleic acid metabolism | MCM                          | Yes                      |
| GPR89B      | 51463   | Golgi pH regulator B                                                           | NP_057418.1       | 2          | 3                 | 3          | 9      | 0.77                                                     | 0.99                                                     | 12.75                                                                                  | 13.69                                                                                  | 22.2                                                                                          | 30.9                                                                                          | 5                                                                              | 5                                                                              | 13604   | 51463          | G protein-coupled receptor 89                                                            | G-protein coupled receptor activity          | Integral to membrane            | G protein coupled receptor          | Cell communication;Signal transduction                                       | TM                           | No                       |
| ARSA        | 410     | arylsulfatase A isoform a precursor                                            | NP_001078896.2    | 2          | 2                 | 2          | 4      | 0.77                                                     | 0.99                                                     | 29.7                                                                                   | 20.47                                                                                  | 33.3                                                                                          | 29.4                                                                                          | 2                                                                              | 2                                                                              | 9617    | 410            | arylsulfatase A                                                                          | Catalytic activity                           | Lysosome                        | Enzyme: Sulfatase                   | Metabolism;Energy pathways                                                   | SULF;SP                      | Yes                      |
| TBC1D2      | 55357   | TBC1 domain family member 2A isoform 1                                         | NP_001254500.1    | 3          | 14                | 14         | 35     | 0.77                                                     | 0.97                                                     | 9.24                                                                                   | 8.73                                                                                   | 31.6                                                                                          | 37.2                                                                                          | 19                                                                             | 18                                                                             | 11624   | 55357          | TBC1 domain family, member 2                                                             | GTPase activator activity                    | -                               | GTPase activating protein           | Cell communication;Signal transduction;Regulation of cell growth             | PH;CC;TBC                    | Yes                      |
| NDUFS8      | 4728    | NADH dehydrogenase [ubiquinone] iron-sulfur protein 8, mitochondrial precursor | NP_002487.1       | 1          | 4                 | 4          | 7      | 0.77                                                     | 0.91                                                     | 11.99                                                                                  | 37.29                                                                                  | 18.5                                                                                          | 76.9                                                                                          | 4                                                                              | 4                                                                              | 3683    | 4728           | NADH dehydrogenase (ubiquinone) Fe-S protein8, 23kDa (NADH-coenzyme Q reductase)         | Oxidoreductase activity                      | Mitochondrion                   | Enzyme: Oxidoreductase              | Metabolism;Energy pathways                                                   | SP                           | Yes                      |
| RASA1       | 5921    | ras GTPase-activating protein 1 isoform 1                                      | NP_002881.1       | 2          | 7                 | 7          | 15     | 0.77                                                     | 0.91                                                     | 11.2                                                                                   | 11.47                                                                                  | 24.9                                                                                          | 30.2                                                                                          | 8                                                                              | 8                                                                              | 745     | 5921           | RAS p21 protein activator GTPase activating protein1                                     | GTPase activator activity                    | Cytoplasm                       | GTPase activating protein           | Cell communication;Signal transduction                                       | SH2;SH3;PH;C2;RASGAP         | Yes                      |

Supplementary Table S1. List of quantified proteins in OKF6/TERT1-Smoke cells  
 Raingopaln *et al.*, 2017. Role of protein kinase N2 (PKN2) in cigarette smoke-mediated oncogenic transformation of oral cells

| Gene Symbol | Gene ID | Protein Description                                                               | Protein Accession | # Proteins | # Unique Peptides | # Peptides | # PSMs | OKF6/TERT1-Smoke/<br>OKF6/TERT1-Parental<br>(130/126) R1 | OKF6/TERT1-Smoke/<br>OKF6/TERT1-Parental<br>(128/127) R2 | Ratio Standard Errors [%]:<br>OKF6/TERT1-Smoke/<br>OKF6/TERT1-Parental<br>(130/126) R1 | Ratio Standard Errors [%]:<br>OKF6/TERT1-Smoke/<br>OKF6/TERT1-Parental<br>(128/127) R2 | Ratio Variabilities [%]:<br>F13: OKF6/TERT1-Smoke/<br>OKF6/TERT1-Parental<br>(130/126) R1 | Ratio Variabilities [%]:<br>F13: OKF6/TERT1-Smoke/<br>OKF6/TERT1-Parental<br>(128/127) R2 | Ratio Counts: F13:<br>OKF6/TERT1-Smoke/<br>OKF6/TERT1-Parental<br>(130/126) R1 | Ratio Counts: F13:<br>OKF6/TERT1-Smoke/<br>OKF6/TERT1-Parental<br>(128/127) R2 | HPRD ID | Entrez Gene ID | Gene Name                                               | Molecular Function                                     | Primary Localization          | Molecular Class                    | Biological Process                                                           | Domains                              | Plasma Proteome Database |
|-------------|---------|-----------------------------------------------------------------------------------|-------------------|------------|-------------------|------------|--------|----------------------------------------------------------|----------------------------------------------------------|----------------------------------------------------------------------------------------|----------------------------------------------------------------------------------------|-------------------------------------------------------------------------------------------|-------------------------------------------------------------------------------------------|--------------------------------------------------------------------------------|--------------------------------------------------------------------------------|---------|----------------|---------------------------------------------------------|--------------------------------------------------------|-------------------------------|------------------------------------|------------------------------------------------------------------------------|--------------------------------------|--------------------------|
| PDLIM7      | 9260    | PDZ and LIM domain protein 7 isoform 1                                            | NP_005442.2       | 3          | 14                | 14         | 52     | 0.77                                                     | 0.91                                                     | 6.51                                                                                   | 10.04                                                                                  | 25                                                                                        | 47.2                                                                                      | 24                                                                             | 24                                                                             | 10436   | 9260           | PDZ and LIM domain 7 (enigma)                           | Receptor signaling complex scaffold activity           | Cytoskeleton                  | Adapter molecule                   | Cell communication;Signal transduction                                       | PDZ,LIM                              | Yes                      |
| RDH10       | 157506  | retinol dehydrogenase 10                                                          | NP_742034.1       | 1          | 1                 | 1          | 1      | 0.77                                                     | 0.89                                                     |                                                                                        |                                                                                        |                                                                                           |                                                                                           | 1                                                                              | 1                                                                              | 7605    | 157506         | retinol dehydrogenase 10 (all-trans)                    | Catalytic activity                                     | Endoplasmic reticulum         | Enzyme: Dehydrogenase              | Metabolism;Energy pathways                                                   | TM                                   | No                       |
| TTC38       | 55020   | tetratricopeptide repeat protein 38                                               | NP_060401.2       | 1          | 2                 | 2          | 2      | 0.77                                                     | 0.83                                                     |                                                                                        |                                                                                        |                                                                                           |                                                                                           | 1                                                                              | 1                                                                              | 7943    | 55020          | None                                                    | Molecular function unknown                             | -                             | Unclassified                       | Biological process unknown                                                   | -                                    | No                       |
| ARL6IP5     | 10550   | PRA1 family protein 3                                                             | NP_006398.1       | 1          | 4                 | 4          | 23     | 0.77                                                     | 0.83                                                     | 10.12                                                                                  | 7.64                                                                                   | 28.6                                                                                      | 23.3                                                                                      | 13                                                                             | 13                                                                             | 9303    | 10550          | ADP-ribosylation-like factor 6 interacting protein 5    | Molecular function unknown                             | Cytoplasm                     | Unclassified                       | Cell communication;Signal transduction                                       | TM                                   | No                       |
| VARS        | 7407    | valine-tRNA ligase                                                                | NP_006286.1       | 6          | 35                | 35         | 116    | 0.77                                                     | 0.78                                                     | 4.44                                                                                   | 4.1                                                                                    | 26.3                                                                                      | 24.4                                                                                      | 57                                                                             | 57                                                                             | 10362   | 7407           | valyl-tRNA synthetase 2                                 | Ligase activity                                        | -                             | Enzyme: Ligase                     | Metabolism;Energy pathways                                                   | CC                                   | Yes                      |
| HSD17B7     | 51478   | 3-keto-steroid reductase isoform 1                                                | NP_057455.1       | 1          | 2                 | 2          | 3      | 0.77                                                     | 0.78                                                     | 19.75                                                                                  | 9.46                                                                                   | 21.7                                                                                      | 10.5                                                                                      | 2                                                                              | 2                                                                              | 5996    | 51478          | hydroxysteroid (17-beta) dehydrogenase 7                | Catalytic activity                                     | Endoplasmic reticulum         | Enzyme: Dehydrogenase              | Metabolism;Energy pathways                                                   | TM                                   | Yes                      |
| PARP14      | 54625   | poly [ADP-ribose] polymerase 14                                                   | NP_060024.2       | 1          | 21                | 21         | 53     | 0.77                                                     | 0.75                                                     | 7.7                                                                                    | 4.59                                                                                   | 30.4                                                                                      | 17.4                                                                                      | 25                                                                             | 25                                                                             | 11421   | 54625          | poly (ADP-ribose) polymerase family, member 14          | Molecular function unknown                             | -                             | Unclassified                       | Biological process unknown                                                   | -                                    | Yes                      |
| MCL1        | 4170    | induced myeloid leukemia cell differentiation protein Mcl-1 isoform 1             | NP_068779.1       | 2          | 2                 | 2          | 3      | 0.77                                                     | 0.74                                                     |                                                                                        |                                                                                        |                                                                                           |                                                                                           |                                                                                |                                                                                | 8870    | 4170           | myeloid cell leukemia sequence 1 (BCL2 related)         | Protein binding;Chaperone activity                     | Mitochondrial membrane        | Chaperone                          | Anti-apoptosis;Apoptosis;Signal transduction                                 | BCL, TM                              | Yes                      |
| ERLIN1      | 10613   | erlin-1                                                                           | NP_006450.2       | 1          | 11                | 14         | 48     | 0.77                                                     | 0.73                                                     | 8.41                                                                                   | 9.17                                                                                   | 28.6                                                                                      | 29.8                                                                                      | 19                                                                             | 19                                                                             | 8502    | 10613          | SPFH domain family, member 1                            | Molecular function unknown                             | Plasma membrane               | Unclassified                       | Biological process unknown                                                   | TM, PHB                              | No                       |
| CA2         | 760     | carbonic anhydrase 2 isoform 1                                                    | NP_000058.1       | 2          | 7                 | 7          | 45     | 0.77                                                     | 0.73                                                     | 5.04                                                                                   | 5.6                                                                                    | 17.6                                                                                      | 18.4                                                                                      | 20                                                                             | 20                                                                             | 2023    | 760            | carbonic anhydrase II                                   | Catalytic activity                                     | Cytoplasm                     | Enzyme: Carbonic anhydrase         | Metabolism;Energy pathways                                                   | -                                    | Yes                      |
| XDH         | 7498    | xanthine dehydrogenase/oxidase                                                    | NP_000370.2       | 2          | 17                | 17         | 51     | 0.77                                                     | 0.72                                                     | 4.63                                                                                   | 11.36                                                                                  | 17.5                                                                                      | 41.7                                                                                      | 24                                                                             | 24                                                                             | 6363    | 7498           | xanthine dehydrogenase                                  | Catalytic activity                                     | Peroxisome                    | Enzyme: Dehydrogenase              | Metabolism;Energy pathways                                                   | -                                    | Yes                      |
| SSH1        | 54434   | protein phosphatase Slingshot homolog 1 isoform 1                                 | NP_061857.3       | 3          | 2                 | 2          | 2      | 0.77                                                     | 0.71                                                     | 48.08                                                                                  | 68.63                                                                                  | 56.1                                                                                      | 77.3                                                                                      | 2                                                                              | 2                                                                              | 9486    | 54434          | slingshot homolog 1 (Drosophila)                        | Protein tyrosine/serine/threonine phosphatase activity | Cytoplasm                     | Dual specificity phosphatase       | Cell growth and/or maintenance                                               | DSPC                                 | Yes                      |
| MYO18A      | 399687  | unconventional myosin-XVIIIa isoform a                                            | NP_510880.2       | 2          | 16                | 16         | 26     | 0.77                                                     | 0.7                                                      | 8.34                                                                                   | 7.27                                                                                   | 25.2                                                                                      | 19.9                                                                                      | 15                                                                             | 15                                                                             | 10106   | 399687         | myosin XVIIIa                                           | Structural molecule activity                           | Endoplasmic reticulum;Nucleus | Structural protein                 | Cell growth and/or maintenance                                               | PDZ, MYOSIN, IQ, CC                  | Yes                      |
| SPATS2L     | 26010   | SPATS2-like protein isoform b                                                     | NP_001093894.1    | 1          | 1                 | 15         | 33     | 0.77                                                     | 0.7                                                      |                                                                                        |                                                                                        |                                                                                           |                                                                                           | 1                                                                              | 1                                                                              | 10916   | 26010          | None                                                    | Molecular function unknown                             | Nucleus                       | Unclassified                       | Biological process unknown                                                   | CC                                   | Yes                      |
| HN1         | 51155   | hematological and neurological expressed 1 protein isoform 2                      | NP_001002032.1    | 4          | 3                 | 3          | 4      | 0.77                                                     | 0.67                                                     | 28.6                                                                                   | 2.22                                                                                   | 32.1                                                                                      | 2.1                                                                                       | 2                                                                              | 2                                                                              | 13665   | 51155          | hematological and neurological expressed 1              | Molecular function unknown                             | Nucleus;Cytoplasm             | Cell cycle control protein         | Cell communication;Signal transduction                                       | -                                    | Yes                      |
| IQGAP1      | 8826    | ras GTPase-activating-like protein IQGAP1                                         | NP_003861.1       | 3          | 59                | 63         | 278    | 0.77                                                     | 0.65                                                     | 4.15                                                                                   | 4.96                                                                                   | 37.7                                                                                      | 38.2                                                                                      | 129                                                                            | 130                                                                            | 4541    | 8826           | IQ motif containing GTPase activating protein 1         | GTPase activator activity                              | Cytoplasm                     | GTPase activating protein          | Cytoskeleton organization and biogenesis                                     | CH, CC, WW, IQ, R, ASGAP             | Yes                      |
| EFR3A       | 23167   | protein EFR3 homolog A                                                            | NP_055952.2       | 1          | 3                 | 3          | 5      | 0.77                                                     | 0.64                                                     | 8.71                                                                                   | 25.33                                                                                  | 11.7                                                                                      | 23.4                                                                                      | 3                                                                              | 2                                                                              | 17179   | 23167          | None                                                    | Molecular function unknown                             | -                             | Unclassified                       | Biological process unknown                                                   | -                                    | Yes                      |
| RBM17       | 84991   | splicing factor 45                                                                | NP_116294.1       | 1          | 2                 | 2          | 5      | 0.76                                                     | 1.89                                                     | 32.79                                                                                  | 24.39                                                                                  | 36.5                                                                                      | 73                                                                                        | 2                                                                              | 2                                                                              | 9501    | 84991          | RNA binding motif protein 17                            | RNA binding                                            | Nucleus                       | RNA binding protein                | Regulation of nucleobase, nucleoside, nucleotide and nucleic acid metabolism | CC-G, PATCH, R, RM                   | Yes                      |
| TM9SF1      | 10548   | transmembrane 9 superfamily member 1 isoform a precursor                          | NP_006396.2       | 2          | 1                 | 1          | 2      | 0.76                                                     | 1.6                                                      |                                                                                        |                                                                                        |                                                                                           |                                                                                           | 1                                                                              | 1                                                                              | 9987    | 10548          | transmembrane 9 superfamily member 1                    | Receptor activity                                      | Plasma membrane               | Integral membrane protein          | Signal transduction                                                          | SP, TM                               | Yes                      |
| MRPS34      | 65993   | 28S ribosomal protein S34, mitochondrial isoform 1                                | NP_001287829.1    | 2          | 2                 | 2          | 7      | 0.76                                                     | 1.52                                                     | 15.27                                                                                  | 4.75                                                                                   | 23.4                                                                                      | 14.5                                                                                      | 4                                                                              | 4                                                                              | 17599   | 65993          | mitochondrial ribosomal protein S34                     | Structural constituent of ribosome                     | Mitochondrion                 | Ribosomal subunit                  | Protein metabolism                                                           | -                                    | Yes                      |
| SOS1        | 6654    | son of sevenless homolog 1                                                        | NP_005624.2       | 1          | 1                 | 1          | 1      | 0.76                                                     | 1.49                                                     |                                                                                        |                                                                                        |                                                                                           |                                                                                           | 1                                                                              | 1                                                                              | 1681    | 6654           | son of sevenless homolog 1 (Drosophila)                 | Guanyl-nucleotide exchange factor activity             | Cytoplasm                     | Guanine nucleotide exchange factor | Cell communication;Signal transduction                                       | RHOGEF, PHLRas, GEFN, RasGEF, C, CSP | Yes                      |
| QRSL1       | 55278   | glutamyl-tRNA(Gln) amidotransferase subunit A, mitochondrial                      | NP_060762.3       | 1          | 1                 | 1          | 2      | 0.76                                                     | 1.42                                                     |                                                                                        |                                                                                        |                                                                                           |                                                                                           | 1                                                                              | 1                                                                              | 15199   | 55278          | glutamyl-tRNA synthetase (glutamine-hydrolyzing)-like 1 | Amidotransferase activity                              | -                             | Enzyme: Amidotransferase           | Metabolism;Energy pathways                                                   | -                                    | No                       |
| ET4         | 9538    | etoposide-induced protein 2.4 homolog isoform 1                                   | NP_004870.3       | 1          | 1                 | 1          | 3      | 0.76                                                     | 1.3                                                      | 22.7                                                                                   | 4.07                                                                                   | 24.8                                                                                      | 7.5                                                                                       | 2                                                                              | 2                                                                              | 5526    | 9538           | etoposide induced 2.4 mRNA                              | Signal transducer activity                             | Integral to membrane          | Integral membrane protein          | Cell communication;Signal transduction                                       | SP, TM                               | No                       |
| PHF6        | 84295   | PHD finger protein 6 isoform 1                                                    | NP_001015877.1    | 2          | 5                 | 5          | 12     | 0.76                                                     | 1.13                                                     | 20.99                                                                                  | 12.15                                                                                  | 40.3                                                                                      | 34.5                                                                                      | 6                                                                              | 6                                                                              | 2330    | 84295          | PHD finger protein 6                                    | Transcription regulator activity                       | Nucleolus;Nucleus;Cytoplasm   | Transcription regulatory protein   | Regulation of nucleobase, nucleoside, nucleotide and nucleic acid metabolism | PHD;NLS                              | Yes                      |
| KIAA1671    | 85379   | uncharacterized protein KIAA1671                                                  | NP_001138678.1    | 1          | 3                 | 3          | 5      | 0.76                                                     | 1.11                                                     | 14.07                                                                                  | 4.87                                                                                   | 15.1                                                                                      | 7.7                                                                                       | 2                                                                              | 2                                                                              | 19693   | 85379          | KIAA1671                                                | Molecular function unknown                             | -                             | Unclassified                       | Biological process unknown                                                   | -                                    | No                       |
| SIPA1L3     | 23094   | signal-induced proliferation-associated 1-like protein 3                          | NP_055888.1       | 1          | 3                 | 4          | 6      | 0.76                                                     | 1.09                                                     | 3.87                                                                                   | 0.03                                                                                   | 5.1                                                                                       | 0.1                                                                                       | 3                                                                              | 3                                                                              | 18755   | 23094          | signal-induced proliferation-associated 1 like 3        | Peptide binding                                        | -                             | Unclassified                       | Biological process unknown                                                   | PDZ;CC                               | Yes                      |
| SUCLG2      | 8801    | succinyl-CoA ligase (GDP-forming) subunit beta, mitochondrial isoform 2 precursor | NP_003839.2       | 2          | 13                | 13         | 38     | 0.76                                                     | 1.08                                                     | 5.32                                                                                   | 1.99                                                                                   | 17.4                                                                                      | 9.2                                                                                       | 18                                                                             | 18                                                                             | 6799    | 8801           | succinate-CoA ligase, GDP-forming, beta subunit         | Ligase activity                                        | Mitochondrion                 | Enzyme: Ligase                     | Metabolism;Energy pathways                                                   | -                                    | Yes                      |
| CYBSB       | 80777   | cytochrome b5 type B                                                              | NP_085056.2       | 1          | 2                 | 2          | 3      | 0.76                                                     | 1.06                                                     | 69.7                                                                                   | 8.61                                                                                   | 86.7                                                                                      | 13                                                                                        | 2                                                                              | 2                                                                              | 13106   | 80777          | None                                                    | Transporter activity                                   | Mitochondrion                 | Transport/cargo protein            | Transport                                                                    | TM                                   | Yes                      |
| EEF1A1      | 1915    | elongation factor 1-alpha 1                                                       | NP_001393.1       | 1          | 14                | 25         | 353    | 0.76                                                     | 1.04                                                     | 9.2                                                                                    | 11.99                                                                                  | 83.3                                                                                      | 212.6                                                                                     | 108                                                                            | 109                                                                            | 559     | 1915           | eukaryotic translation elongation factor 1 alpha 1      | Transcription regulator activity                       | Cytoplasm                     | Transcription regulatory protein   | Regulation of cell cycle                                                     | -                                    | Yes                      |

Supplementary Table S1. List of quantified proteins in OKF6/TERT1-Smoke cells  
 Raingopaln *et al.*, 2017. Role of protein kinase N2 (PKN2) in cigarette smoke-mediated oncogenic transformation of oral cells

| Gene Symbol | Gene ID | Protein Description                                               | Protein Accession | # Proteins | # Unique Peptides | # Peptides | # PSMs | OKF6/TERT1-Smoke/<br>OKF6/TERT1-Parental<br>(130/126) R1 | OKF6/TERT1-Smoke/<br>OKF6/TERT1-Parental<br>(128/127) R2 | Ratio Standard Errors [%]:<br>OKF6/TERT1-Smoke/<br>OKF6/TERT1-Parental<br>(130/126) R1 | Ratio Standard Errors [%]:<br>OKF6/TERT1-Smoke/<br>OKF6/TERT1-Parental<br>(128/127) R2 | Ratio Variabilities [%]:<br>F13: OKF6/TERT1-<br>Smoke/<br>OKF6/TERT1-Parental<br>(130/126) R1 | Ratio Variabilities [%]:<br>F13: OKF6/TERT1-<br>Smoke/<br>OKF6/TERT1-Parental<br>(128/127) R2 | Ratio Counts: F13:<br>OKF6/TERT1-Smoke/<br>OKF6/TERT1-Parental<br>(130/126) R1 | Ratio Counts: F13:<br>OKF6/TERT1-Smoke/<br>OKF6/TERT1-Parental<br>(128/127) R2 | HPRD ID | Entrez Gene ID | Gene Name                                                                        | Molecular Function                                           | Primary Localization                  | Molecular Class                          | Biological Process                                                                           | Domains       | Plasma Proteome Database |
|-------------|---------|-------------------------------------------------------------------|-------------------|------------|-------------------|------------|--------|----------------------------------------------------------|----------------------------------------------------------|----------------------------------------------------------------------------------------|----------------------------------------------------------------------------------------|-----------------------------------------------------------------------------------------------|-----------------------------------------------------------------------------------------------|--------------------------------------------------------------------------------|--------------------------------------------------------------------------------|---------|----------------|----------------------------------------------------------------------------------|--------------------------------------------------------------|---------------------------------------|------------------------------------------|----------------------------------------------------------------------------------------------|---------------|--------------------------|
| MPHOSPH8    | 54737   | M-phase phosphoprotein 8                                          | NP_059990.2       | 1          | 2                 | 2          | 4      | 0.76                                                     | 1.02                                                     | 15.53                                                                                  | 15.26                                                                                  | 16.9                                                                                          | 22.3                                                                                          | 2                                                                              | 2                                                                              | 13682   | 54737          | None                                                                             | Molecular function unknown                                   | Nucleus                               | Cell cycle control protein               | Cell growth and/or maintenance                                                               | CHROMO-ANK-CC | Yes                      |
| TOMM70A     | 9868    | mitochondrial import receptor subunit TOM70                       | NP_055635.3       | 1          | 15                | 15         | 41     | 0.76                                                     | 0.93                                                     | 8.4                                                                                    | 6.08                                                                                   | 28.3                                                                                          | 25                                                                                            | 19                                                                             | 19                                                                             | 16194   | 9868           | translocase of outer mitochondrial membrane70 homolog A (yeast)                  | Auxiliary transport protein activity                         | Mitochondrion                         | Membrane transport protein               | Transport                                                                                    | SP;TM;TPR     | Yes                      |
| CCDC53      | 51019   | WASH complex subunit CCDC53 isoform 1                             | NP_057137.1       | 2          | 1                 | 1          | 4      | 0.76                                                     | 0.92                                                     | 19.47                                                                                  | 40.31                                                                                  | 21.1                                                                                          | 56.1                                                                                          | 2                                                                              | 2                                                                              | 13031   | 51019          | None                                                                             | Molecular function unknown                                   | -                                     | Unclassified                             | Biological process unknown                                                                   | CC            | Yes                      |
| APMAP       | 57136   | adipocyte plasma membrane-associated protein                      | NP_065392.1       | 1          | 15                | 15         | 48     | 0.76                                                     | 0.89                                                     | 6.47                                                                                   | 6.47                                                                                   | 25.1                                                                                          | 39.3                                                                                          | 25                                                                             | 25                                                                             |         |                |                                                                                  |                                                              |                                       |                                          |                                                                                              |               |                          |
| EPHX1       | 2052    | epoxide hydrolase 1                                               | NP_001129490.1    | 1          | 8                 | 8          | 22     | 0.76                                                     | 0.87                                                     | 7.96                                                                                   | 8.67                                                                                   | 21.1                                                                                          | 26.5                                                                                          | 12                                                                             | 12                                                                             | 581     | 2052           | epoxide hydrolase 1, microsomal (xenobiotic)                                     | Hydrolase activity                                           | Endoplasmic reticulum                 | Enzyme; Hydrolase                        | Metabolism;Energy pathways                                                                   | ABH           | No                       |
| HSPA4L      | 22824   | heat shock 70 kDa protein 4L                                      | NP_055093.2       | 1          | 23                | 28         | 86     | 0.76                                                     | 0.85                                                     | 6.77                                                                                   | 9.27                                                                                   | 28.8                                                                                          | 45.1                                                                                          | 30                                                                             | 30                                                                             | 7137    | 22824          | heat shock 70kDa protein 4-like                                                  | Heat shock protein activity                                  | Cytoplasm                             | Heat shock protein                       | Protein metabolism                                                                           | -             | Yes                      |
| ERP29       | 10961   | endoplasmic reticulum resident protein 29 isoform 1 precursor     | NP_006808.1       | 2          | 8                 | 8          | 37     | 0.76                                                     | 0.83                                                     | 6.49                                                                                   | 6.55                                                                                   | 21.1                                                                                          | 23.3                                                                                          | 18                                                                             | 18                                                                             | 3794    | 10961          | chromosome 12 open reading frame 8                                               | Chaperone activity                                           | Endoplasmic reticulum                 | Chaperone                                | Protein folding                                                                              | SP;TM         | Yes                      |
| VDAC3       | 7419    | voltage-dependent anion-selective channel protein 3 isoform 1     | NP_005653.3       | 2          | 11                | 12         | 78     | 0.76                                                     | 0.83                                                     | 5.2                                                                                    | 5.69                                                                                   | 21.8                                                                                          | 26.4                                                                                          | 30                                                                             | 30                                                                             | 6750    | 7419           | voltage-dependent anion channel 3                                                | Voltage-gated ion channel activity                           | Mitochondrion                         | Voltage gated channel                    | Transport                                                                                    | LZ            | Yes                      |
| ATP13A1     | 57130   | manganese-transporting ATPase 13A1                                | NP_065143.2       | 1          | 8                 | 8          | 17     | 0.76                                                     | 0.82                                                     | 2.92                                                                                   | 5.44                                                                                   | 7                                                                                             | 14.1                                                                                          | 10                                                                             | 10                                                                             | 12501   | 57130          | ATPase type 13A1                                                                 | ATPase activity                                              | Integral to membrane                  | ATPase                                   | Metabolism;Energy pathways                                                                   | TM            | Yes                      |
| ICMT        | 23463   | protein-S-isoprenylcysteine O-methyltransferase                   | NP_036537.1       | 1          | 1                 | 1          | 1      | 0.76                                                     | 0.8                                                      |                                                                                        |                                                                                        |                                                                                               |                                                                                               | 1                                                                              | 1                                                                              | 9321    | 23463          | isoprenylcysteine carboxyl methyltransferase                                     | Methyltransferase activity                                   | Endoplasmic reticulum                 | Enzyme; Methyltransferase                | Protein modification                                                                         | TM            | Yes                      |
| RAB4B       | 53916   | ras-related protein Rab-4B                                        | NP_057238.3       | 10         | 2                 | 4          | 37     | 0.76                                                     | 0.78                                                     | 38.13                                                                                  | 48.02                                                                                  | 42.5                                                                                          | 57.3                                                                                          | 2                                                                              | 2                                                                              | 11473   | 53916          | RAB4B, member RAS oncogene family                                                | GTPase activity                                              | -                                     | GTPase                                   | Cell communication;Signal transduction                                                       | RAB           | Yes                      |
| RALB        | 5899    | ras-related protein Ral-B                                         | NP_002872.1       | 1          | 2                 | 3          | 7      | 0.76                                                     | 0.77                                                     | 16.91                                                                                  | 3.41                                                                                   | 18.4                                                                                          | 3.7                                                                                           | 2                                                                              | 2                                                                              | 1550    | 5899           | v-ral simian leukemia viral oncogene homolog B(ras related, GTP binding protein) | GTPase activity                                              | Cytoplasm                             | GTPase                                   | Cell communication;Signal transduction                                                       | RAS           | No                       |
| CAST        | 831     | calpastatin isoform f                                             | NP_001035905.1    | 2          | 4                 | 27         | 136    | 0.76                                                     | 0.77                                                     | 13.37                                                                                  | 3.27                                                                                   | 29.3                                                                                          | 7.1                                                                                           | 8                                                                              | 8                                                                              | 233     | 831            | calpastatin                                                                      | Protease inhibitor activity                                  | Nucleus;Cytoplasm;Perinuclear region  | Protease inhibitor                       | Protein metabolism                                                                           | CC            | Yes                      |
| ARMCX3      | 51566   | armadillo repeat-containing X-linked protein 3                    | NP_057691.1       | 1          | 3                 | 3          | 5      | 0.76                                                     | 0.77                                                     | 9.26                                                                                   | 14.06                                                                                  | 12.2                                                                                          | 19                                                                                            | 3                                                                              | 3                                                                              | 2294    | 51566          | armadillo repeat containing, X-linked 3                                          | Molecular function unknown                                   | Plasma membrane                       | Unclassified                             | Immune response;Embryonic development                                                        | ARM;TM        | Yes                      |
| MICAL2      | 9645    | protein-methionine sulfoxide oxidase MICAL2 isoform a             | NP_055447.1       | 5          | 2                 | 3          | 5      | 0.76                                                     | 0.77                                                     |                                                                                        |                                                                                        |                                                                                               |                                                                                               | 1                                                                              | 1                                                                              | 10085   | 9645           | microtubule associated monooxygenase, calpain and LIM domain containing 2        | Cytoskeletal protein binding                                 | -                                     | Cytoskeletal associated protein          | Cell growth and/or maintenance                                                               | CHLIM         | Yes                      |
| HSD17B11    | 51170   | estradiol 17-beta-dehydrogenase 11 precursor                      | NP_057329.3       | 1          | 1                 | 1          | 2      | 0.76                                                     | 0.7                                                      |                                                                                        |                                                                                        |                                                                                               |                                                                                               | 1                                                                              | 1                                                                              | 10881   | 51170          | dehydrogenase/red uctase (SDR family) member 8                                   | Catalytic activity                                           | Cytoplasm                             | Enzyme; Dehydrogenase                    | Metabolism;Energy pathways                                                                   | SP            | No                       |
| PLEK2       | 26499   | pleckstrin-2                                                      | NP_057529.1       | 1          | 3                 | 3          | 7      | 0.76                                                     | 0.68                                                     | 9.61                                                                                   | 10.45                                                                                  | 14.7                                                                                          | 14.3                                                                                          | 4                                                                              | 4                                                                              | 12151   | 26499          | pleckstrin 2                                                                     | Cytoskeletal protein binding                                 | Plasma membrane                       | Cytoskeletal associated protein          | Cell growth and/or maintenance                                                               | PH;DSH        | Yes                      |
| LAMTOR1     | 55004   | regulator complex protein LAMTOR1                                 | NP_060377.1       | 1          | 5                 | 5          | 15     | 0.76                                                     | 0.68                                                     | 8.14                                                                                   | 6.68                                                                                   | 17.6                                                                                          | 12.9                                                                                          | 8                                                                              | 8                                                                              |         |                |                                                                                  |                                                              |                                       |                                          |                                                                                              |               |                          |
| NCOA2       | 10499   | nuclear receptor coactivator 2                                    | NP_006531.1       | 1          | 1                 | 1          | 2      | 0.76                                                     | 0.65                                                     |                                                                                        |                                                                                        |                                                                                               |                                                                                               | 1                                                                              | 1                                                                              | 9066    | 10499          | nuclear receptor coactivator 2                                                   | Transcription regulator activity                             | Nucleus                               | Transcription regulatory protein         | Regulation of nucleobase, nucleoside, nucleotide and nucleic acid metabolism                 | HLH;PAS       | Yes                      |
| HLA-A       | 3105    | HLA class I histocompatibility antigen, A-1 alpha chain precursor | NP_001229687.1    | 1          | 1                 | 6          | 26     | 0.76                                                     | 0.64                                                     | 6.52                                                                                   | 4.68                                                                                   | 7.1                                                                                           | 4.3                                                                                           | 2                                                                              | 2                                                                              | 826     | 3105           | major histocompatibility complex, class I, A                                     | MHC class I receptor activity;MHC class II receptor activity | Plasma membrane                       | MHC complex protein                      | Immune response                                                                              | IGC;SP;TM     | Yes                      |
| VPS29       | 51699   | vacuolar protein sorting-associated protein 29 isoform 3          | NP_001269079.1    | 4          | 4                 | 4          | 14     | 0.76                                                     | 0.63                                                     | 3.68                                                                                   | 11.11                                                                                  | 7.9                                                                                           | 20.1                                                                                          | 8                                                                              | 8                                                                              | 9499    | 51699          | vacuolar protein sorting 29 (yeast)                                              | Hydrolase activity;Protein binding                           | Endosome                              | Transport/cargo protein;Enzyme;Hydrolase | Protein metabolism;Protein targeting                                                         | -             | Yes                      |
| LGALS3      | 3958    | galectin-3 isoform 1                                              | NP_002297.2       | 2          | 4                 | 4          | 8      | 0.76                                                     | 0.61                                                     | 27.39                                                                                  | 9.63                                                                                   | 54.5                                                                                          | 14.4                                                                                          | 6                                                                              | 6                                                                              | 1090    | 3958           | lectin, galactoside binding, soluble, 3(galectin 3)                              | Transcription regulator activity                             | Cytoplasm                             | Transcription regulatory protein         | Regulation of nucleobase, nucleoside, nucleotide and nucleic acid metabolism                 | GLECT         | Yes                      |
| C14orf159   | 80017   | UPF0317 protein C14orf159, mitochondrial isoform b precursor      | NP_001273399.1    | 5          | 4                 | 4          | 8      | 0.76                                                     | 0.55                                                     | 42.69                                                                                  | 31.56                                                                                  | 72.1                                                                                          | 35.5                                                                                          | 4                                                                              | 4                                                                              | 16612   | 80017          | chromosome 14 open reading frame 159                                             | Molecular function unknown                                   | -                                     | Unclassified                             | Biological process unknown                                                                   | -             | Yes                      |
| BCAM        | 4059    | basal cell adhesion molecule isoform 1 precursor                  | NP_005572.2       | 2          | 7                 | 7          | 15     | 0.76                                                     | 0.55                                                     | 24.76                                                                                  | 10.02                                                                                  | 57.1                                                                                          | 15.7                                                                                          | 8                                                                              | 8                                                                              | 197     | 4059           | Lutheran blood group (Aberberg antigen included)                                 | Cell adhesion molecule activity                              | Plasma membrane                       | Adhesion molecule                        | Cell communication;Signal transduction;Cell-cell adhesion;Cell-matrix adhesion;Cell adhesion | TM;IG;KC2;SP  | Yes                      |
| INPP5K      | 51763   | inositol polyphosphate 5-phosphatase K isoform 1                  | NP_057616.2       | 2          | 1                 | 1          | 2      | 0.76                                                     | 0.54                                                     |                                                                                        |                                                                                        |                                                                                               |                                                                                               | 1                                                                              | 1                                                                              | 8489    | 51763          | None                                                                             | Lipid phosphatase activity                                   | Golgi apparatus;Endoplasmic reticulum | Lipid phosphatase                        | Regulation of signal transduction                                                            | L;Phosphatase | Yes                      |
| PCBP2       | 5094    | poly(rC)-binding protein 2 isoform a                              | NP_005007.2       | 6          | 1                 | 11         | 78     | 0.75                                                     | 1.49                                                     | 29.84                                                                                  | 45.18                                                                                  | 32.4                                                                                          | 121                                                                                           | 2                                                                              | 2                                                                              | 3129    | 5094           | poly(rC) binding protein 2                                                       | RNA binding;DNA binding                                      | Nucleus                               | RNA binding protein                      | Regulation of nucleobase, nucleoside, nucleotide and nucleic acid metabolism                 | KH            | Yes                      |

Supplementary Table S1. List of quantified proteins in OKF6/TERT1-Smoke cells  
 Raingonalan *et al.*, 2017. Role of protein kinase N2 (PKN2) in cigarette smoke-mediated oncogenic transformation of oral cells

| Gene Symbol | Gene ID | Protein Description                                         | Protein Accession | # Proteins | # Unique Peptides | # Peptides | # PSMs | OKF6/TERT1-Smoke/<br>OKF6/TERT1-Parental<br>(130/126) R1 | OKF6/TERT1-Smoke/<br>OKF6/TERT1-Parental<br>(128/127) R2 | Ratio Standard Errors [%]:<br>OKF6/TERT1-Smoke/<br>OKF6/TERT1-Parental<br>(130/126) R1 | Ratio Standard Errors [%]:<br>OKF6/TERT1-Smoke/<br>OKF6/TERT1-Parental<br>(128/127) R2 | Ratio Variabilities [%]:<br>F13: OKF6/TERT1-<br>Smoke/<br>OKF6/TERT1-Parental<br>(130/126) R1 | Ratio Variabilities [%]:<br>F13: OKF6/TERT1-<br>Smoke/<br>OKF6/TERT1-Parental<br>(128/127) R2 | Ratio Counts: F13:<br>OKF6/TERT1-Smoke/<br>OKF6/TERT1-Parental<br>(130/126) R1 | Ratio Counts: F13:<br>OKF6/TERT1-Smoke/<br>OKF6/TERT1-Parental<br>(128/127) R2 | HPRD ID | Entrez Gene ID                          | Gene Name                                                       | Molecular Function                         | Primary Localization                             | Molecular Class                 | Biological Process                                               | Domains        | Plasma Proteome Database |
|-------------|---------|-------------------------------------------------------------|-------------------|------------|-------------------|------------|--------|----------------------------------------------------------|----------------------------------------------------------|----------------------------------------------------------------------------------------|----------------------------------------------------------------------------------------|-----------------------------------------------------------------------------------------------|-----------------------------------------------------------------------------------------------|--------------------------------------------------------------------------------|--------------------------------------------------------------------------------|---------|-----------------------------------------|-----------------------------------------------------------------|--------------------------------------------|--------------------------------------------------|---------------------------------|------------------------------------------------------------------|----------------|--------------------------|
| ARMC8       | 25852   | armadillo repeat-containing protein 8 isoform 2             | NP_056211.2       | 5          | 3                 | 3          | 7      | 0.75                                                     | 1.39                                                     | 7.41                                                                                   | 10.04                                                                                  | 9.7                                                                                           | 24.4                                                                                          | 3                                                                              | 9992                                                                           | 25852   | armadillo repeat containing 8           | Molecular function unknown                                      | -                                          | Unclassified                                     | Biological process unknown      | ARM                                                              | No             |                          |
| DEFA6       | 1671    | defensin-6 preproprotein                                    | NP_001917.1       | 1          | 1                 | 1          | 2      | 0.75                                                     | 1.23                                                     |                                                                                        |                                                                                        |                                                                                               |                                                                                               | 1                                                                              | 2719                                                                           | 1671    | defensin, alpha 6, Paneth cell-specific | Defense/immunity protein activity                               | Secretory granule                          | Defensin                                         | Immune response                 | SP                                                               | Yes            |                          |
| URB1        | 9875    | nucleolar pre-ribosomal-associated protein 1                | NP_055640.2       | 1          | 5                 | 5          | 8      | 0.75                                                     | 1.23                                                     | 41.05                                                                                  | 7.1                                                                                    | 78.4                                                                                          | 19.7                                                                                          | 5                                                                              | 5                                                                              | 19701   | 9875                                    | URB1 ribosome biogenesis 1 homolog (S. cerevisiae)              | Protein binding                            | -                                                | Unclassified                    | Biological process unknown                                       | -              | Yes                      |
| IRF6        | 3664    | interferon regulatory factor 6 isoform 1                    | NP_006138.1       | 2          | 13                | 13         | 38     | 0.75                                                     | 1.21                                                     | 9.79                                                                                   | 10.44                                                                                  | 34.4                                                                                          | 63.4                                                                                          | 21                                                                             | 21                                                                             | 6227    | 3664                                    | interferon regulatory factor 6                                  | Transcription factor activity              | Nucleus                                          | Transcription factor            | Regulation of nucleobase, nucleotide and nucleic acid metabolism | IRF            | Yes                      |
| CIRBP       | 1153    | cold-inducible RNA-binding protein isoform 1                | NP_001271.1       | 3          | 6                 | 6          | 11     | 0.75                                                     | 1.16                                                     | 14.34                                                                                  | 18.15                                                                                  | 24.3                                                                                          | 49.6                                                                                          | 5                                                                              | 5                                                                              | 8375    | 1153                                    | cold inducible RNA binding protein                              | RNA binding                                | Nucleus                                          | RNA binding protein             | Cell communication;Signal transduction                           | RRM            | Yes                      |
| ZZEF1       | 23140   | zinc finger ZZ-type and EF-hand domain-containing protein 1 | NP_055928.3       | 1          | 1                 | 1          | 1      | 0.75                                                     | 1.16                                                     | 1.16                                                                                   |                                                                                        |                                                                                               |                                                                                               | 1                                                                              | 1                                                                              | 15906   | 23140                                   | zinc finger, ZZ-type with EF hand domain 1                      | Molecular function unknown                 | -                                                | Unclassified                    | Biological process unknown                                       | EF;F59C;ZnF_ZZ | Yes                      |
| CNN2        | 1265    | calponin-2 isoform d                                        | NP_001290430.1    | 4          | 12                | 13         | 46     | 0.75                                                     | 1.15                                                     | 10.99                                                                                  | 9.94                                                                                   | 38                                                                                            | 54.5                                                                                          | 20                                                                             | 20                                                                             | 3847    | 1265                                    | calponin 2                                                      | Cytoskeletal protein binding               | Cytoplasm                                        | Cytoskeletal associated protein | Cell growth and/or maintenance                                   | CH             | Yes                      |
| FBLN1       | 54751   | filamin-binding LIM protein 1 isoform a                     | NP_060026.2       | 3          | 7                 | 7          | 12     | 0.75                                                     | 1.07                                                     | 7.71                                                                                   | 13.4                                                                                   | 14.2                                                                                          | 36.2                                                                                          | 6                                                                              | 6                                                                              | 9669    | 54751                                   | None                                                            | Cytoskeletal protein binding               | Actin cytoskeleton                               | Cytoskeletal associated protein | Regulation of cell shape                                         | LIM;NES        | No                       |
| NR2F1       | 7025    | COUP transcription factor 1                                 | NP_005645.1       | 4          | 1                 | 1          | 1      | 0.75                                                     | 1.05                                                     | 1.05                                                                                   |                                                                                        |                                                                                               |                                                                                               | 1                                                                              | 1                                                                              | 584     | 7025                                    | nuclear receptor subfamily 2, group F, member 1                 | Ligand-dependent nuclear receptor activity | Nucleus                                          | Nuclear receptor                | Cell communication;Signal transduction                           | ZnF_C4;HOLI    | Yes                      |
| GOLGA7      | 51125   | Golgin subfamily A member 7 isoform a                       | NP_057183.2       | 2          | 1                 | 1          | 10     | 0.75                                                     | 1.05                                                     | 20.99                                                                                  | 21.94                                                                                  | 36.2                                                                                          | 55                                                                                            | 5                                                                              | 5                                                                              | 13595   | 51125                                   | golgi autoantigen, golgin subfamily a, 7                        | Transporter activity                       | Golgi apparatus                                  | Integral membrane protein       | Transport                                                        | CC             | No                       |
| XPO4        | 64328   | exportin-4                                                  | NP_071904.4       | 1          | 5                 | 6          | 14     | 0.75                                                     | 1.04                                                     | 29.02                                                                                  | 4.02                                                                                   | 57.4                                                                                          | 10.2                                                                                          | 6                                                                              | 6                                                                              | 18307   | 64328                                   | exportin 4                                                      | Transporter activity                       | Nucleus                                          | Transport/cargo protein         | Transport                                                        | -              | Yes                      |
| STBD1       | 8987    | starch-binding domain-containing protein 1                  | NP_003934.1       | 1          | 2                 | 2          | 3      | 0.75                                                     | 1.03                                                     | 0.94                                                                                   | 8.63                                                                                   | 1                                                                                             | 12.6                                                                                          | 2                                                                              | 2                                                                              | 8460    | 8987                                    | None                                                            | Molecular function unknown                 | Plasma membrane                                  | Integral membrane protein       | Biological process unknown                                       | TM             | Yes                      |
| HIP1R       | 9026    | huntingtin-interacting protein 1-related protein isoform 1  | NP_003950.1       | 3          | 3                 | 4          | 6      | 0.75                                                     | 0.99                                                     | 0.5                                                                                    | 7.3                                                                                    | 0.6                                                                                           | 12.6                                                                                          | 3                                                                              | 3                                                                              | 10412   | 9026                                    | None                                                            | Cytoskeletal protein binding               | Cytoplasmic vesicle                              | Cytoskeletal associated protein | Cell growth and/or maintenance                                   | CC             | Yes                      |
| SEC11A      | 23478   | signal peptidase complex catalytic subunit SEC11A isoform 3 | NP_001258851.1    | 6          | 5                 | 5          | 11     | 0.75                                                     | 0.99                                                     | 16                                                                                     | 22.71                                                                                  | 32.4                                                                                          | 65.3                                                                                          | 7                                                                              | 7                                                                              | 7503    | 23478                                   | SEC11-like 1 (S. cerevisiae)                                    | Aminopeptidase activity                    | -                                                | Aminopeptidase                  | Protein metabolism                                               | TM             | Yes                      |
| NPC2        | 10577   | epididymal secretory protein E1 precursor                   | NP_006423.1       | 1          | 1                 | 1          | 2      | 0.75                                                     | 0.99                                                     | 0.99                                                                                   |                                                                                        |                                                                                               |                                                                                               | 1                                                                              | 1                                                                              | 3008    | 10577                                   | Niemann-Pick disease, type C2                                   | Transporter activity                       | Lysosome                                         | Transport/cargo protein         | Metabolism;Energy pathways                                       | SP             | Yes                      |
| ZNF414      | 84330   | zinc finger protein 414 isoform 1                           | NP_001139647.1    | 1          | 1                 | 1          | 2      | 0.75                                                     | 0.98                                                     | 0.98                                                                                   |                                                                                        |                                                                                               |                                                                                               | 1                                                                              | 1                                                                              | 17511   | 84330                                   | zinc finger protein 414                                         | DNA binding                                | Nucleus                                          | DNA binding protein             | Regulation of nucleobase, nucleotide and nucleic acid metabolism | ZNFC2          | No                       |
| NAGK        | 55577   | N-acetyl-D-glucosamine kinase                               | NP_060037.3       | 1          | 7                 | 7          | 18     | 0.75                                                     | 0.94                                                     | 11.64                                                                                  | 11.82                                                                                  | 26.5                                                                                          | 34.1                                                                                          | 9                                                                              | 9                                                                              | 8441    | 55577                                   | N-acetylglucosamine kinase                                      | Catalytic activity                         | -                                                | Enzyme: Phosphotransferase      | Metabolism;Energy pathways                                       | -              | Yes                      |
| UBLCP1      | 134510  | ubiquitin-like domain-containing CTD phosphatase 1          | NP_659486.2       | 1          | 3                 | 3          | 4      | 0.75                                                     | 0.9                                                      | 25.4                                                                                   | 16.83                                                                                  | 33.8                                                                                          | 26.7                                                                                          | 3                                                                              | 3                                                                              | 8318    | 134510                                  | None                                                            | Hydrolase activity                         | Nucleus                                          | Enzyme: Phosphatase             | RNA metabolism                                                   | UBQ;CC;CPD;    | No                       |
| ITPA        | 3704    | inosine triphosphate pyrophosphatase isoform a              | NP_258412.1       | 3          | 2                 | 2          | 5      | 0.75                                                     | 0.86                                                     | 5.08                                                                                   | 2.86                                                                                   | 6.6                                                                                           | 4.3                                                                                           | 3                                                                              | 3                                                                              | 8856    | 3704                                    | inosine triphosphatase (nucleoside triphosphatepyrophosphatase) | Hydrolase activity                         | Cytoplasm                                        | Enzyme: Hydrolase               | Metabolism;Energy pathways                                       | -              | Yes                      |
| ARL3        | 403     | ADP-ribosylation factor-like protein 3                      | NP_004302.1       | 1          | 8                 | 8          | 16     | 0.75                                                     | 0.84                                                     | 5.36                                                                                   | 4.28                                                                                   | 12.1                                                                                          | 10.8                                                                                          | 9                                                                              | 9                                                                              | 5260    | 403                                     | ADP-ribosylation factor-like 3                                  | GTPase activity                            | Cytoplasm                                        | GTPase                          | Cell communication;Signal transduction                           | ARF            | Yes                      |
| RDH11       | 51109   | retinol dehydrogenase 11 isoform 1 precursor                | NP_057110.3       | 2          | 6                 | 6          | 16     | 0.75                                                     | 0.84                                                     | 11.13                                                                                  | 13.06                                                                                  | 25.3                                                                                          | 33.7                                                                                          | 9                                                                              | 9                                                                              | 9707    | 51109                                   | retinol dehydrogenase 11 (all-trans and 9-cis)                  | Catalytic activity                         | Endoplasmic reticulum                            | Enzyme: Dehydrogenase           | Metabolism;Energy pathways                                       | TM             | Yes                      |
| GNPAT       | 8443    | dihydroxyacetone phosphate acyltransferase                  | NP_055051.1       | 1          | 3                 | 3          | 5      | 0.75                                                     | 0.83                                                     | 1.61                                                                                   | 22.41                                                                                  | 2.1                                                                                           | 33.2                                                                                          | 3                                                                              | 3                                                                              | 4120    | 8443                                    | glyceronephosphate O-acetyltransferase                          | Acyltransferase activity                   | Peroxisome                                       | Enzyme: Acyltransferase         | Metabolism;Energy pathways                                       | PISC           | No                       |
| RIN1        | 9610    | ras and Rab interactor 1                                    | NP_004283.2       | 1          | 7                 | 7          | 15     | 0.75                                                     | 0.8                                                      | 6.49                                                                                   | 3.46                                                                                   | 13.9                                                                                          | 7.8                                                                                           | 8                                                                              | 8                                                                              | 5813    | 9610                                    | Ras and Rab interactor 1                                        | Molecular function unknown                 | Plasma membrane                                  | Unclassified                    | Cell communication;Signal transduction                           | SH2;VPS9;RA    | Yes                      |
| STX17       | 55014   | syntaxin-17                                                 | NP_060389.2       | 1          | 2                 | 2          | 3      | 0.75                                                     | 0.79                                                     | 1.31                                                                                   | 40.99                                                                                  | 1.4                                                                                           | 48.2                                                                                          | 2                                                                              | 2                                                                              | 5013    | 55014                                   | syntaxin 17                                                     | Auxiliary transport protein activity       | Endoplasmic reticulum                            | Membrane transport protein      | Transport                                                        | CC;TM;SNARE    | Yes                      |
| IAH1        | 285148  | isoamyl acetate-hydrolyzing esterase 1 homolog precursor    | NP_001034702.1    | 1          | 4                 | 4          | 6      | 0.75                                                     | 0.77                                                     | 28.96                                                                                  | 8.36                                                                                   | 38.8                                                                                          | 11.1                                                                                          | 3                                                                              | 3                                                                              | 19064   | 285148                                  | isoamyl acetate-hydrolyzing esterase 1 homolog (S. cerevisiae)  | Hydrolase activity                         | -                                                | Enzyme: Esterase                | Energy pathways;Metabolism                                       | -              | No                       |
| TACO1       | 51204   | translational activator of cytochrome oxidase 1             | NP_057444.2       | 1          | 3                 | 3          | 6      | 0.75                                                     | 0.73                                                     | 21.61                                                                                  | 9.46                                                                                   | 28.8                                                                                          | 12                                                                                            | 3                                                                              | 3                                                                              | 17421   | 51204                                   | None                                                            | Molecular function unknown                 | -                                                | Unclassified                    | Biological process unknown                                       | SP             | Yes                      |
| EHD2        | 30846   | EH domain-containing protein 2                              | NP_055416.2       | 1          | 13                | 15         | 46     | 0.75                                                     | 0.73                                                     | 8.52                                                                                   | 14.8                                                                                   | 32.8                                                                                          | 58.4                                                                                          | 25                                                                             | 25                                                                             | 10434   | 30846                                   | EH-domain containing 2                                          | Molecular function unknown                 | Cytoplasm                                        | Unclassified                    | Cell communication;Signal transduction                           | EH;NLS         | Yes                      |
| HSPB1       | 3315    | heat shock protein beta-1                                   | NP_001531.1       | 1          | 12                | 12         | 252    | 0.75                                                     | 0.72                                                     | 4.89                                                                                   | 4.58                                                                                   | 43.8                                                                                          | 39.3                                                                                          | 132                                                                            | 131                                                                            | 9076    | 3315                                    | heat shock 27kDa protein 1                                      | Chaperone activity                         | Cytoplasm                                        | Chaperone                       | Protein metabolism                                               | -              | Yes                      |
| TMPO        | 7112    | thymopoietin isoform beta                                   | NP_001027454.1    | 3          | 8                 | 15         | 44     | 0.75                                                     | 0.72                                                     | 8.55                                                                                   | 13.47                                                                                  | 21.5                                                                                          | 33.1                                                                                          | 11                                                                             | 11                                                                             | 1777    | 7112                                    | thymopoietin                                                    | Molecular function unknown                 | Nucleus;Nuclear membrane;Mitochondrion;Cytoplasm | Peptide hormone                 | Nuclear organization and biogenesis;Regulation of cell cycle     | TM             | Yes                      |
| RAP1A       | 5906    | ras-related protein Rap-1A precursor                        | NP_001010935.1    | 1          | 2                 | 9          | 22     | 0.75                                                     | 0.72                                                     | 42.33                                                                                  | 31.75                                                                                  | 47.1                                                                                          | 33.3                                                                                          | 2                                                                              | 2                                                                              | 1545    | 5906                                    | RAP1A, member of RAS oncogene family                            | GTPase activity                            | Plasma membrane                                  | GTPase                          | Cell communication;Signal transduction                           | RAS            | No                       |

Supplementary Table S1. List of quantified proteins in OKF6/TERT1-Smoke cells  
 Raigopaln *et al.*, 2017. Role of protein kinase N2 (PKN2) in cigarette smoke-mediated oncogenic transformation of oral cells

| Gene Symbol | Gene ID   | Protein Description                                                    | Protein Accession | # Proteins | # Unique Peptides | # Peptides | # PSMs | OKF6/TERT1-Smoke/<br>OKF6/TERT1-Parental<br>(130/126) R1 | OKF6/TERT1-Smoke/<br>OKF6/TERT1-Parental<br>(128/127) R2 | Ratio Standard Errors [%]:<br>OKF6/TERT1-Smoke/<br>OKF6/TERT1-Parental<br>(130/126) R1 | Ratio Standard Errors [%]:<br>OKF6/TERT1-Smoke/<br>OKF6/TERT1-Parental<br>(128/127) R2 | Ratio Variabilities [%]:<br>F13: OKF6/TERT1-<br>Smoke/<br>OKF6/TERT1-Parental<br>(130/126) R1 | Ratio Variabilities [%]:<br>F13: OKF6/TERT1-<br>Smoke/<br>OKF6/TERT1-Parental<br>(128/127) R2 | Ratio Counts: F13:<br>OKF6/TERT1-Smoke/<br>OKF6/TERT1-Parental<br>(130/126) R1 | Ratio Counts: F13:<br>OKF6/TERT1-Smoke/<br>OKF6/TERT1-Parental<br>(128/127) R2 | HPRD ID | Entrez Gene ID | Gene Name                                                                         | Molecular Function                                               | Primary Localization         | Molecular Class                  | Biological Process                                                                | Domains                     | Plasma Proteome Database |
|-------------|-----------|------------------------------------------------------------------------|-------------------|------------|-------------------|------------|--------|----------------------------------------------------------|----------------------------------------------------------|----------------------------------------------------------------------------------------|----------------------------------------------------------------------------------------|-----------------------------------------------------------------------------------------------|-----------------------------------------------------------------------------------------------|--------------------------------------------------------------------------------|--------------------------------------------------------------------------------|---------|----------------|-----------------------------------------------------------------------------------|------------------------------------------------------------------|------------------------------|----------------------------------|-----------------------------------------------------------------------------------|-----------------------------|--------------------------|
| PHAX        | 51808     | phosphorylated adapter RNA export protein                              | NP_115553.2       | 1          | 3                 | 3          | 5      | 0.75                                                     | 0.71                                                     | 22.89                                                                                  | 32.52                                                                                  | 24.6                                                                                          | 33.7                                                                                          | 2                                                                              | 2                                                                              | 15122   | 51808          | None                                                                              | RNA binding                                                      | Nucleus                      | RNA binding protein              | Regulation of nucleobase, nucleoside, nucleotide and nucleic acid metabolism      | NES                         | No                       |
| VEZT        | 55591     | vezatin                                                                | NP_060069.3       | 1          | 2                 | 2          | 3      | 0.75                                                     | 0.63                                                     | 39.22                                                                                  | 146.24                                                                                 | 43.2                                                                                          | 209.4                                                                                         | 2                                                                              | 2                                                                              | 11671   | 55591          | None                                                                              | Cell adhesion molecule activity                                  | Plasma membrane              | Adhesion molecule                | Cell growth and/or maintenance                                                    | TM,CC                       | Yes                      |
| ARPP19      | 10776     | cAMP-regulated phosphoprotein 19 isoform 1                             | NP_001293120.1    | 9          | 3                 | 3          | 4      | 0.75                                                     | 0.62                                                     | 21.02                                                                                  | 20.52                                                                                  | 22.5                                                                                          | 18.2                                                                                          | 2                                                                              | 2                                                                              | 9264    | 10776          | None                                                                              | Molecular function unknown                                       | Cytoplasm                    | Unclassified                     | Cell communication;Signal transduction                                            | -                           | Yes                      |
| FIS1        | 51024     | mitochondrial fission 1 protein                                        | NP_057152.2       | 1          | 4                 | 4          | 16     | 0.75                                                     | 0.6                                                      | 16.94                                                                                  | 10.28                                                                                  | 37.1                                                                                          | 17.6                                                                                          | 8                                                                              | 8                                                                              | 12352   | 51024          | tetratricopeptide repeat domain 11                                                | Molecular function unknown                                       | Mitochondrion                | Unclassified                     | Apoptosis                                                                         | TM,LLZ,CC,TPR               | Yes                      |
| C16orf62    | 57020     | UPF0505 protein C16orf62 isoform 1                                     | NP_064710.4       | 2          | 1                 | 1          | 2      | 0.75                                                     | 0.55                                                     |                                                                                        |                                                                                        |                                                                                               |                                                                                               | 1                                                                              | 1                                                                              | 14455   | 57020          | None                                                                              | Molecular function unknown                                       | Nucleus                      | Unclassified                     | Biological process unknown                                                        | -                           | No                       |
| GBP6        | 163351    | guanylate-binding protein 6                                            | NP_940862.2       | 1          | 5                 | 5          | 8      | 0.75                                                     | 0.55                                                     | 5.6                                                                                    | 75.5                                                                                   | 8.4                                                                                           | 100.1                                                                                         | 4                                                                              | 4                                                                              | 13572   | 163351         | guanylate binding protein family, member 6                                        | GTPase activity                                                  | -                            | GTPase                           | Cell communication;Signal transduction                                            | CC                          | No                       |
| CNNM3       | 26505     | metal transporter CNNM3 isoform 1 precursor                            | NP_060093.3       | 2          | 1                 | 1          | 2      | 0.74                                                     | 1.42                                                     |                                                                                        |                                                                                        |                                                                                               |                                                                                               | 1                                                                              | 1                                                                              | 7419    | 26505          | cyclin M3                                                                         | Molecular function unknown                                       | Nucleus                      | Cell cycle control protein       | Cell communication;Signal transduction                                            | TM                          | No                       |
| VIL1        | 7429      | villin-1                                                               | NP_009058.2       | 1          | 1                 | 1          | 2      | 0.74                                                     | 1.33                                                     |                                                                                        |                                                                                        |                                                                                               |                                                                                               | 1                                                                              | 1                                                                              | 1898    | 7429           | villin 1                                                                          | Cytoskeletal protein binding                                     | Cytoplasm                    | Cytoskeletal associated protein  | Cell growth and/or maintenance                                                    | GEL,VHP                     | Yes                      |
| RTN3        | 10313     | reticulon-3 isoform d                                                  | NP_958833.1       | 9          | 3                 | 3          | 7      | 0.74                                                     | 1.21                                                     | 27.95                                                                                  | 16.22                                                                                  | 29.9                                                                                          | 28.3                                                                                          | 2                                                                              | 2                                                                              | 18516   | 10313          | reticulon 3                                                                       | Molecular function unknown                                       | Endoplasmic reticulum        | Integral membrane protein        | Biological process unknown                                                        | TM                          | Yes                      |
| PCDH1       | 5097      | protocadherin-1 isoform 2 precursor                                    | NP_115796.2       | 4          | 1                 | 1          | 1      | 0.74                                                     | 1.2                                                      |                                                                                        |                                                                                        |                                                                                               |                                                                                               | 1                                                                              | 1                                                                              | 4692    | 5097           | protocadherin 1 (cadherin-like 1)                                                 | Cell adhesion molecule activity                                  | Plasma membrane              | Adhesion molecule                | Cell adhesion                                                                     | SP,Cadherin,TM              | Yes                      |
| HSPE1-MOB4  | 100529241 | HSPE1-MOB4 protein                                                     | NP_001189414.1    | 4          | 4                 | 5          | 19     | 0.74                                                     | 1.17                                                     | 4.31                                                                                   | 15.18                                                                                  | 8.5                                                                                           | 49.5                                                                                          | 7                                                                              | 7                                                                              |         |                |                                                                                   |                                                                  |                              |                                  |                                                                                   |                             |                          |
| GNB2        | 2783      | guanine nucleotide-binding protein G(i)G(s)G(t) subunit beta-2         | NP_005264.2       | 3          | 4                 | 10         | 49     | 0.74                                                     | 1.17                                                     | 15.07                                                                                  | 7.32                                                                                   | 36.4                                                                                          | 27.5                                                                                          | 10                                                                             | 10                                                                             | 11820   | 2783           | guanine nucleotide binding protein (G protein),beta polypeptide 2                 | GTPase activity                                                  | Cytoplasm                    | G protein                        | Cell communication;Signal transduction                                            | CC,WD40                     | Yes                      |
| SPG20       | 23111     | spartin                                                                | NP_001135766.1    | 1          | 2                 | 2          | 3      | 0.74                                                     | 1.15                                                     | 19.08                                                                                  | 42.76                                                                                  | 20.2                                                                                          | 78.9                                                                                          | 2                                                                              | 2                                                                              | 6170    | 23111          | spastic paraplegia 20, spartin (Troyersyndrome)                                   | Molecular function unknown                                       | Cytoplasm                    | Unclassified                     | Transport                                                                         | CC                          | Yes                      |
| PIR         | 8544      | pirin                                                                  | NP_001018119.1    | 1          | 1                 | 1          | 2      | 0.74                                                     | 1.12                                                     |                                                                                        |                                                                                        |                                                                                               |                                                                                               | 1                                                                              | 1                                                                              | 4510    | 8544           | pirin (iron-binding nuclear protein)                                              | Transcription regulator activity;Transcription cofactor activity | Nuclear matrix               | Transcription regulatory protein | Regulation of nucleobase, nucleoside, nucleotide and nucleic acid metabolism      | -                           | Yes                      |
| CMPK2       | 129607    | UMP-CMP kinase 2, mitochondrial isoform 1 precursor                    | NP_997198.2       | 3          | 2                 | 2          | 4      | 0.74                                                     | 1.07                                                     | 3.81                                                                                   | 12.86                                                                                  | 4                                                                                             | 19.6                                                                                          | 2                                                                              | 2                                                                              | 11233   | 129607         | None                                                                              | Molecular function unknown                                       | -                            | Unclassified                     | Biological process unknown                                                        | -                           | No                       |
| VKORC1L1    | 154807    | vitamin K epoxide reductase complex subunit 1-like protein 1 isoform 2 | NP_001271271.1    | 2          | 2                 | 2          | 3      | 0.74                                                     | 1.06                                                     |                                                                                        |                                                                                        |                                                                                               |                                                                                               | 1                                                                              | 1                                                                              | 12312   | 154807         | vitamin K epoxide reductase complex, subunit 1-like 1                             | Molecular function unknown                                       | -                            | Integral membrane protein        | Biological process unknown                                                        | TM                          | No                       |
| AK2         | 204       | adenylate kinase 2, mitochondrial isoform a                            | NP_001616.1       | 3          | 7                 | 7          | 24     | 0.74                                                     | 1.01                                                     | 15.83                                                                                  | 9.35                                                                                   | 38.5                                                                                          | 30.5                                                                                          | 10                                                                             | 10                                                                             | 47      | 204            | adenylate kinase 2                                                                | Catalytic activity                                               | Mitochondrion                | Enzyme;Phosphotransferase        | Metabolism;Energy pathways                                                        | -                           | Yes                      |
| RBFOX2      | 23543     | RNA binding protein fox-1 homolog 2 isoform 5                          | NP_001076047.1    | 12         | 1                 | 1          | 1      | 0.74                                                     | 1                                                        |                                                                                        |                                                                                        |                                                                                               |                                                                                               | 1                                                                              | 1                                                                              |         |                |                                                                                   |                                                                  |                              |                                  |                                                                                   |                             |                          |
| HMGCL       | 3155      | hydroxymethylglutaryl-CoA lyase, mitochondrial isoform 1 precursor     | NP_000182.2       | 1          | 1                 | 1          | 2      | 0.74                                                     | 0.96                                                     |                                                                                        |                                                                                        |                                                                                               |                                                                                               | 1                                                                              | 1                                                                              | 2003    | 3155           | 3-hydroxymethyl-3-methylglutaryl-Coenzyme A lyase (hydroxymethylglutaricaciduria) | Lyase activity                                                   | Mitochondrion                | Enzyme;Lyase                     | Metabolism;Energy pathways                                                        | SP                          | Yes                      |
| NDFUS7      | 374291    | NADH dehydrogenase [ubiquinone] iron-sulfur protein 7, mitochondrial   | NP_077718.3       | 1          | 4                 | 4          | 8      | 0.74                                                     | 0.88                                                     | 8.14                                                                                   | 4.62                                                                                   | 13.4                                                                                          | 9.1                                                                                           | 5                                                                              | 5                                                                              | 3491    | 374291         | NADH dehydrogenase (ubiquinone)-Fe-S protein7, 20kDa (NADH-coenzyme Q reductase)  | Oxidoreductase activity                                          | Mitochondrion                | Enzyme;Oxidoreductase            | Metabolism;Energy pathways                                                        | -                           | Yes                      |
| GLO1        | 2739      | lactoylglutathione lyase                                               | NP_006699.2       | 1          | 7                 | 7          | 13     | 0.74                                                     | 0.87                                                     | 13.62                                                                                  | 14.54                                                                                  | 32.7                                                                                          | 41.7                                                                                          | 10                                                                             | 10                                                                             | 730     | 2739           | glyoxalase I                                                                      | Lyase activity                                                   | Cytoplasm                    | Enzyme;Lyase                     | Metabolism;Energy pathways                                                        | -                           | Yes                      |
| HOOK2       | 29911     | protein Hook homolog 2 isoform 1                                       | NP_037444.2       | 2          | 1                 | 1          | 2      | 0.74                                                     | 0.87                                                     |                                                                                        |                                                                                        |                                                                                               |                                                                                               | 1                                                                              | 1                                                                              | 9698    | 29911          | hook homolog 2 (Drosophila)                                                       | Cytoskeletal protein binding                                     | Cytoplasm                    | Cytoskeletal associated protein  | Cell growth and/or maintenance                                                    | CC,TM                       | Yes                      |
| POGLUT1     | 56983     | protein O-glucosyltransferase 1 precursor                              | NP_689518.1       | 1          | 4                 | 4          | 12     | 0.74                                                     | 0.85                                                     | 14.25                                                                                  | 7.92                                                                                   | 26.4                                                                                          | 16.5                                                                                          | 6                                                                              | 6                                                                              |         |                |                                                                                   |                                                                  |                              |                                  |                                                                                   |                             |                          |
| CCDC50      | 152137    | coiled-coil domain-containing protein 50 long isoform                  | NP_848018.1       | 2          | 1                 | 1          | 2      | 0.74                                                     | 0.83                                                     |                                                                                        |                                                                                        |                                                                                               |                                                                                               | 1                                                                              | 1                                                                              | 6463    | 152137         | chromosome 3 open reading frame 6                                                 | Molecular function unknown                                       | Nucleus;Cytoplasm            | Unclassified                     | Biological process unknown                                                        | CC                          | Yes                      |
| ITGB4       | 3691      | integrin beta-4 isoform 1 precursor                                    | NP_000204.3       | 1          | 1                 | 65         | 204    | 0.74                                                     | 0.82                                                     |                                                                                        |                                                                                        |                                                                                               |                                                                                               | 1                                                                              | 1                                                                              | 946     | 3691           | integrin, beta 4                                                                  | Cell adhesion molecule activity                                  | Integral to membrane;Nucleus | Adhesion molecule                | Cell communication;Signal transduction;Cell migration;Cell adhesion;Wound healing | PSL,VWA,CALXB,FNS,TM,EGF,SP | Yes                      |
| PLP2        | 5355      | protolipid protein 2 (colonic epithelium enriched)                     | NP_002659.1       | 1          | 2                 | 2          | 8      | 0.74                                                     | 0.78                                                     | 14.46                                                                                  | 16.6                                                                                   | 21.5                                                                                          | 26.4                                                                                          | 4                                                                              | 4                                                                              | 2121    | 5355           | protolipid protein 2 (colonic epithelium enriched)                                | Ion channel activity                                             | Endoplasmic reticulum        | Ion channel                      | Transport                                                                         | TM,SP                       | No                       |
| HOMER3      | 9454      | homer protein homolog 3 isoform 1                                      | NP_004829.3       | 3          | 5                 | 5          | 8      | 0.74                                                     | 0.76                                                     | 14.2                                                                                   | 17.8                                                                                   | 23.8                                                                                          | 31                                                                                            | 5                                                                              | 5                                                                              | 7270    | 9454           | homer homolog 3 (Drosophila)                                                      | Receptor signaling complex scaffold activity                     | Cytoplasm                    | Adapter molecule                 | Cell communication;Signal transduction                                            | WH1,SPECTRIN,CC             | Yes                      |
| CSNKID      | 1453      | casein kinase 1 isoform delta isoform 1                                | NP_001884.2       | 2          | 1                 | 4          | 6      | 0.74                                                     | 0.74                                                     |                                                                                        |                                                                                        |                                                                                               |                                                                                               | 1                                                                              | 1                                                                              | 2920    | 1453           | casein kinase 1, delta                                                            | Protein serine/threonine kinase activity                         | Cytoplasm;Nucleus            | Serine/threonine kinase          | Cell communication;Signal transduction                                            | S_T_kinase                  | Yes                      |

Supplementary Table S1. List of quantified proteins in OKF6/TERT1-Smoke cells  
 Raingonpala *et al.*, 2017. Role of protein kinase N2 (PKN2) in cigarette smoke-mediated oncogenic transformation of oral cells

| Gene Symbol | Gene ID | Protein Description                                                           | Protein Accession | # Proteins | # Unique Peptides | # Peptides | # PSMs | OKF6/TERT1-Smoke/<br>OKF6/TERT1-Parental<br>(130/126) R1 | OKF6/TERT1-Smoke/<br>OKF6/TERT1-Parental<br>(128/127) R2 | Ratio Standard Errors [%]:<br>OKF6/TERT1-Smoke/<br>OKF6/TERT1-Parental<br>(130/126) R1 | Ratio Standard Errors [%]:<br>OKF6/TERT1-Smoke/<br>OKF6/TERT1-Parental<br>(128/127) R2 | Ratio Variabilities [%]:<br>F13: OKF6/TERT1-<br>Smoke/<br>OKF6/TERT1-Parental<br>(130/126) R1 | Ratio Variabilities [%]:<br>F13: OKF6/TERT1-<br>Smoke/<br>OKF6/TERT1-Parental<br>(128/127) R2 | Ratio Counts: F13:<br>OKF6/TERT1-Smoke/<br>OKF6/TERT1-Parental<br>(130/126) R1 | Ratio Counts: F13:<br>OKF6/TERT1-Smoke/<br>OKF6/TERT1-Parental<br>(128/127) R2 | HPRD ID | Entrez Gene ID | Gene Name                                                                             | Molecular Function                            | Primary Localization     | Molecular Class                  | Biological Process                                                           | Domains   | Plasma Proteome Database |
|-------------|---------|-------------------------------------------------------------------------------|-------------------|------------|-------------------|------------|--------|----------------------------------------------------------|----------------------------------------------------------|----------------------------------------------------------------------------------------|----------------------------------------------------------------------------------------|-----------------------------------------------------------------------------------------------|-----------------------------------------------------------------------------------------------|--------------------------------------------------------------------------------|--------------------------------------------------------------------------------|---------|----------------|---------------------------------------------------------------------------------------|-----------------------------------------------|--------------------------|----------------------------------|------------------------------------------------------------------------------|-----------|--------------------------|
| MCM5        | 4174    | DNA replication licensing factor MCM5                                         | NP_006730.2       | 1          | 14                | 14         | 31     | 0.74                                                     | 0.73                                                     | 11.99                                                                                  | 8.52                                                                                   | 37.8                                                                                          | 26                                                                                            | 17                                                                             | 17                                                                             | 4075    | 4174           | MCM5<br>minichromosome maintenance deficient 5 cell division cycle 46 (S. cerevisiae) | DNA binding                                   | Nucleus                  | DNA binding protein              | Regulation of nucleobase, nucleoside, nucleotide and nucleic acid metabolism | MCM       | Yes                      |
| PALLD       | 23022   | palladin isoform 4                                                            | NP_001159582.1    | 6          | 19                | 19         | 37     | 0.74                                                     | 0.72                                                     | 9.59                                                                                   | 12.4                                                                                   | 32.4                                                                                          | 40.5                                                                                          | 20                                                                             | 19                                                                             | 9731    | 23022          | None                                                                                  | Molecular function unknown                    | Cytoplasm                | Unclassified                     | Cell growth and/or maintenance                                               | KIC2      | No                       |
| SAMD9       | 54809   | sterile alpha motif domain-containing protein 9                               | NP_060124.2       | 2          | 16                | 17         | 38     | 0.74                                                     | 0.72                                                     | 6.31                                                                                   | 8.95                                                                                   | 20                                                                                            | 27.9                                                                                          | 18                                                                             | 18                                                                             | 11531   | 54809          | sterile alpha motif domain containing 9                                               | Molecular function unknown                    | -                        | Unclassified                     | Biological process unknown                                                   | SAM       | Yes                      |
| HEBP1       | 50865   | heme-binding protein 1                                                        | NP_057071.2       | 1          | 1                 | 1          | 2      | 0.74                                                     | 0.72                                                     |                                                                                        |                                                                                        |                                                                                               |                                                                                               | 1                                                                              | 1                                                                              | 16162   | 50865          | heme binding protein 1                                                                | Molecular function unknown                    | Cytoplasm                | Unclassified                     | Biological process unknown                                                   | -         | No                       |
| PLIN3       | 10226   | perilipin-3 isoform 1                                                         | NP_005808.3       | 3          | 18                | 18         | 74     | 0.74                                                     | 0.7                                                      | 11.51                                                                                  | 8.56                                                                                   | 56.1                                                                                          | 38.3                                                                                          | 38                                                                             | 38                                                                             | 4080    | 10226          | mannose-6-phosphate receptor binding protein 1                                        | Transporter activity                          | Cytoplasm                | Transport/cargo protein          | Transport                                                                    | -         | Yes                      |
| AIM1        | 202     | absent in melanoma 1 protein                                                  | NP_001615.2       | 1          | 30                | 30         | 79     | 0.74                                                     | 0.69                                                     | 8.1                                                                                    | 8.11                                                                                   | 40.7                                                                                          | 38.1                                                                                          | 43                                                                             | 43                                                                             | 18576   | 202            | absent in melanoma 1                                                                  | Calcium ion binding                           | Cytoskeleton             | Calcium binding protein          | Cell communication; Regulation of cell proliferation; Signal transduction    | XTAL      | Yes                      |
| PKP2        | 5318    | plakophilin-2 isoform 2b                                                      | NP_004563.2       | 6          | 21                | 22         | 52     | 0.74                                                     | 0.68                                                     | 8.05                                                                                   | 12.3                                                                                   | 30                                                                                            | 41.8                                                                                          | 24                                                                             | 23                                                                             | 4177    | 5318           | plakophilin 2                                                                         | Molecular function unknown                    | Nucleus                  | Unclassified                     | Cell adhesion                                                                | ARM       | Yes                      |
| AG04        | 192670  | protein argonaute-4                                                           | NP_060099.2       | 4          | 2                 | 2          | 2      | 0.74                                                     | 0.67                                                     | 8.38                                                                                   | 11.04                                                                                  | 8.8                                                                                           | 10.5                                                                                          | 2                                                                              | 2                                                                              |         |                |                                                                                       |                                               |                          |                                  |                                                                              |           |                          |
| PRDX3       | 10935   | thioredoxin-dependent peroxidase reductase, mitochondrial isoform a precursor | NP_006784.1       | 2          | 8                 | 8          | 45     | 0.74                                                     | 0.66                                                     | 5.18                                                                                   | 11.03                                                                                  | 18.9                                                                                          | 36.7                                                                                          | 24                                                                             | 24                                                                             | 5305    | 10935          | peroxiredoxin 3                                                                       | Peroxidase activity                           | Mitochondrion            | Enzyme; Peroxidase               | Metabolism; Energy pathways                                                  | -         | Yes                      |
| LAMP1       | 3916    | lysosome-associated membrane glycoprotein 1 precursor                         | NP_005552.3       | 1          | 5                 | 5          | 29     | 0.74                                                     | 0.64                                                     | 12.74                                                                                  | 15.36                                                                                  | 36.4                                                                                          | 37.8                                                                                          | 14                                                                             | 14                                                                             | 1076    | 3916           | lysosomal-associated membrane protein 1                                               | Molecular function unknown                    | Lysosome                 | Integral membrane protein        | Biological process unknown                                                   | SP;TM     | Yes                      |
| EFN2        | 1948    | ephrin-B2 precursor                                                           | NP_004084.1       | 1          | 1                 | 1          | 2      | 0.74                                                     | 0.61                                                     |                                                                                        |                                                                                        |                                                                                               |                                                                                               | 1                                                                              | 1                                                                              | 2754    | 1948           | ephrin-B2                                                                             | Receptor binding                              | Plasma membrane          | Membrane bound ligand            | Cell communication; Signal transduction                                      | SP;TM     | Yes                      |
| FAM83A      | 84985   | protein FAM83A isoform a                                                      | NP_116288.2       | 3          | 2                 | 2          | 3      | 0.74                                                     | 0.57                                                     | 18.61                                                                                  | 44.3                                                                                   | 19.8                                                                                          | 37.1                                                                                          | 2                                                                              | 2                                                                              | 17489   | 84985          | None                                                                                  | Molecular function unknown                    | -                        | Unclassified                     | Biological process unknown                                                   | -         | No                       |
| PHPT1       | 29085   | 14 kDa phosphohistidine phosphatase isoform 4                                 | NP_001274271.1    | 4          | 2                 | 2          | 3      | 0.73                                                     | 1.73                                                     |                                                                                        |                                                                                        |                                                                                               |                                                                                               | 1                                                                              | 1                                                                              | 17849   | 29085          | phosphohistidine phosphatase 1                                                        | Phosphoprotein phosphatase activity           | Cytoplasm                | Enzyme; Phosphatase              | Biological process unknown                                                   | -         | No                       |
| MFN1        | 55669   | mitofusin-1                                                                   | NP_284941.2       | 1          | 1                 | 2          | 4      | 0.73                                                     | 1.34                                                     |                                                                                        |                                                                                        |                                                                                               |                                                                                               | 1                                                                              | 1                                                                              | 16344   | 55669          | mitofusin 1                                                                           | GTPase activity                               | Mitochondrion            | GTPase                           | Mitochondrion organization and biogenesis                                    | CC;TM     | Yes                      |
| DNAJB1      | 3337    | dnaJ homolog subfamily B member 1 isoform 1                                   | NP_006136.1       | 2          | 12                | 13         | 39     | 0.73                                                     | 1.19                                                     | 12.4                                                                                   | 6.32                                                                                   | 37.7                                                                                          | 30.9                                                                                          | 16                                                                             | 16                                                                             | 5198    | 3337           | DnaJ (Hsp40) homolog, subfamily B, member 1                                           | Heat shock protein activity                   | Cytoplasm                | Heat shock protein               | Protein metabolism                                                           | DNAJ      | Yes                      |
| PPP6C       | 5537    | serine/threonine-protein phosphatase 6 catalytic subunit isoform a            | NP_001116827.1    | 3          | 5                 | 5          | 8      | 0.73                                                     | 1.13                                                     | 4.19                                                                                   | 25.18                                                                                  | 4.4                                                                                           | 42                                                                                            | 2                                                                              | 2                                                                              | 2141    | 5537           | protein phosphatase 6, catalytic subunit                                              | Protein serine/threonine phosphatase activity | Nucleus                  | Serine/threonine phosphatase     | Cell communication; Signal transduction                                      | PP2A      | Yes                      |
| CSRP1       | 1465    | cysteine and glycine-rich protein 1 isoform 1                                 | NP_004069.1       | 2          | 4                 | 4          | 12     | 0.73                                                     | 1.13                                                     | 14.2                                                                                   | 3.7                                                                                    | 28.1                                                                                          | 11.1                                                                                          | 7                                                                              | 7                                                                              | 470     | 1465           | cysteine and glycine-rich protein 1                                                   | Receptor signaling complex scaffold activity  | Cytoplasm                | Adapter molecule                 | Cell communication; Signal transduction                                      | LIM;NLS   | Yes                      |
| TEL2        | 9894    | telomere length regulation protein TEL2 homolog                               | NP_057195.2       | 1          | 7                 | 7          | 13     | 0.73                                                     | 1.06                                                     | 7.6                                                                                    | 12.85                                                                                  | 14.7                                                                                          | 37.4                                                                                          | 7                                                                              | 7                                                                              | 10016   | 9894           | None                                                                                  | Molecular function unknown                    | -                        | Unclassified                     | Biological process unknown                                                   | -         | No                       |
| PARVA       | 55742   | alpha-parvin                                                                  | NP_060692.2       | 1          | 3                 | 4          | 15     | 0.73                                                     | 1.06                                                     | 8.65                                                                                   | 8.57                                                                                   | 14.3                                                                                          | 20.5                                                                                          | 5                                                                              | 5                                                                              | 16283   | 55742          | parvin, alpha                                                                         | Cytoskeletal protein binding                  | Plasma membrane; Nucleus | Cytoskeletal associated protein  | Cell growth and/or maintenance                                               | CH;NLS    | Yes                      |
| ARMT1       | 79624   | protein-glutamate O-methyltransferase isoform a                               | NP_078849.1       | 2          | 4                 | 4          | 8      | 0.73                                                     | 1.06                                                     | 4.78                                                                                   | 3.03                                                                                   | 7                                                                                             | 6.4                                                                                           | 4                                                                              | 4                                                                              |         |                |                                                                                       |                                               |                          |                                  |                                                                              |           |                          |
| SNX3        | 8724    | sorting nexin-3 isoform a                                                     | NP_003786.1       | 4          | 2                 | 3          | 4      | 0.73                                                     | 1.04                                                     |                                                                                        |                                                                                        |                                                                                               |                                                                                               | 1                                                                              | 1                                                                              | 9333    | 8724           | sorting nexin 3                                                                       | Protein transporter activity                  | Endosome                 | Transport/cargo protein          | Intracellular signaling cascade; Protein transport                           | PX        | Yes                      |
| ABI1        | 10006   | abl interactor 1 isoform a                                                    | NP_005461.2       | 12         | 6                 | 7          | 11     | 0.73                                                     | 1.01                                                     | 12.32                                                                                  | 15.94                                                                                  | 22.4                                                                                          | 41                                                                                            | 6                                                                              | 6                                                                              | 4336    | 10006          | abl-interactor 1                                                                      | Binding                                       | Cytosol                  | Adapter molecule                 | Regulation of cell growth; Signal transduction                               | SH3;PEST  | Yes                      |
| ERH         | 2079    | enhancer of rudimentary homolog                                               | NP_004441.1       | 1          | 2                 | 2          | 6      | 0.73                                                     | 1                                                        | 9.35                                                                                   | 8.06                                                                                   | 11.9                                                                                          | 14                                                                                            | 3                                                                              | 3                                                                              | 9026    | 2079           | enhancer of rudimentary homolog (Drosophila)                                          | Transcription regulator activity              | Nucleus                  | Transcription regulatory protein | Regulation of nucleobase, nucleoside, nucleotide and nucleic acid metabolism | -         | Yes                      |
| HEATR6      | 63897   | HEAT repeat-containing protein 6                                              | NP_071353.4       | 1          | 4                 | 4          | 8      | 0.73                                                     | 0.96                                                     | 7.3                                                                                    | 15.18                                                                                  | 10.7                                                                                          | 29.8                                                                                          | 4                                                                              | 4                                                                              | 12399   | 63897          | None                                                                                  | Molecular function unknown                    | -                        | Unclassified                     | Biological process unknown                                                   | HEAT      | No                       |
| TFDP1       | 7027    | transcription factor Dp-1                                                     | NP_009042.1       | 1          | 1                 | 1          | 2      | 0.73                                                     | 0.96                                                     |                                                                                        |                                                                                        |                                                                                               |                                                                                               | 1                                                                              | 1                                                                              | 1792    | 7027           | transcription factor Dp-1                                                             | Transcription factor activity                 | Nucleus                  | Transcription factor             | Regulation of nucleobase, nucleoside, nucleotide and nucleic acid metabolism | CC        | Yes                      |
| SLMAP       | 7871    | sarcolemma membrane-associated protein isoform a                              | NP_001291349.1    | 5          | 4                 | 4          | 16     | 0.73                                                     | 0.96                                                     | 19.46                                                                                  | 19.62                                                                                  | 44.5                                                                                          | 61.6                                                                                          | 9                                                                              | 9                                                                              | 4079    | 7871           | sarcolemma associated protein                                                         | Molecular function unknown                    | Plasma membrane          | Unclassified                     | Biological process unknown                                                   | TM;FHA;CC | Yes                      |
| SLC12A9     | 56996   | solute carrier family 12 member 9 isoform 1                                   | NP_064631.2       | 3          | 3                 | 3          | 6      | 0.73                                                     | 0.89                                                     | 16.8                                                                                   | 11.31                                                                                  | 21.5                                                                                          | 17.5                                                                                          | 3                                                                              | 3                                                                              | 11564   | 56996          | solute carrier family 12 (potassium/chloride cotransporters), member 9                | Auxiliary transport protein activity          | Plasma membrane          | Membrane transport protein       | Transport                                                                    | -         | No                       |
| TMX1        | 81542   | thioredoxin-related transmembrane protein 1 precursor                         | NP_110382.3       | 1          | 7                 | 7          | 14     | 0.73                                                     | 0.85                                                     | 10.58                                                                                  | 8.35                                                                                   | 23.6                                                                                          | 21.5                                                                                          | 9                                                                              | 9                                                                              | 15590   | 81542          | thioredoxin domain containing                                                         | Oxidoreductase activity                       | Endoplasmic reticulum    | Enzyme; Oxidoreductase           | Metabolism; Energy pathways                                                  | SP;TM     | No                       |
| GSTZ1       | 2954    | maleylacetoacetate isomerase isoform 1                                        | NP_665877.1       | 3          | 2                 | 2          | 7      | 0.73                                                     | 0.85                                                     | 59.4                                                                                   | 60.09                                                                                  | 86.4                                                                                          | 109.6                                                                                         | 3                                                                              | 3                                                                              | 4785    | 2954           | glutathione transferase zeta 1 (maleylacetoacetate isomerase)                         | Glutathione transferase activity              | -                        | Enzyme; Glutathione transferase  | Metabolism; Energy pathways                                                  | -         | Yes                      |

Supplementary Table S1. List of quantified proteins in OKF6/TERT1-Smoke cells  
 Raingonalan *et al.*, 2017. Role of protein kinase N2 (PKN2) in cigarette smoke-mediated oncogenic transformation of oral cells

| Gene Symbol | Gene ID | Protein Description                                           | Protein Accession | # Proteins | # Unique Peptides | # Peptides | # PSMs | OKF6/TERT1-Smoke/<br>OKF6/TERT1-Parental<br>(130/126) R1 | OKF6/TERT1-Smoke/<br>OKF6/TERT1-Parental<br>(128/127) R2 | Ratio Standard Errors [%]:<br>OKF6/TERT1-Smoke/<br>OKF6/TERT1-Parental<br>(130/126) R1 | Ratio Standard Errors [%]:<br>OKF6/TERT1-Smoke/<br>OKF6/TERT1-Parental<br>(128/127) R2 | Ratio Variabilities [%]:<br>F13: OKF6/TERT1-<br>Smoke/<br>OKF6/TERT1-Parental<br>(130/126) R1 | Ratio Variabilities [%]:<br>F13: OKF6/TERT1-<br>Smoke/<br>OKF6/TERT1-Parental<br>(128/127) R2 | Ratio Counts: F13:<br>OKF6/TERT1-Smoke/<br>OKF6/TERT1-Parental<br>(130/126) R1 | Ratio Counts: F13:<br>OKF6/TERT1-Smoke/<br>OKF6/TERT1-Parental<br>(128/127) R2 | HPRD ID | Entrez Gene Id | Gene Name                                                               | Molecular Function                              | Primary Localization                             | Molecular Class                     | Biological Process                                                           | Domains            | Plasma Proteome Database |
|-------------|---------|---------------------------------------------------------------|-------------------|------------|-------------------|------------|--------|----------------------------------------------------------|----------------------------------------------------------|----------------------------------------------------------------------------------------|----------------------------------------------------------------------------------------|-----------------------------------------------------------------------------------------------|-----------------------------------------------------------------------------------------------|--------------------------------------------------------------------------------|--------------------------------------------------------------------------------|---------|----------------|-------------------------------------------------------------------------|-------------------------------------------------|--------------------------------------------------|-------------------------------------|------------------------------------------------------------------------------|--------------------|--------------------------|
| C1orf116    | 79098   | specifically androgen-regulated gene protein isoform 1        | NP_076427.2       | 2          | 15                | 15         | 34     | 0.73                                                     | 0.8                                                      | 8.14                                                                                   | 7.56                                                                                   | 26.5                                                                                          | 27                                                                                            | 19                                                                             | 19                                                                             | 15294   | 79098          | None                                                                    | Molecular function unknown                      | Cytoplasm                                        | Unclassified                        | Biological process unknown                                                   | -                  | No                       |
| CEPT1       | 10390   | choline/ethanolaminephosphotransferase 1                      | NP_001007795.1    | 1          | 1                 | 1          | 4      | 0.73                                                     | 0.79                                                     | 7.69                                                                                   | 26.24                                                                                  | 8                                                                                             | 30                                                                                            | 2                                                                              | 2                                                                              | 13024   | 10390          | choline/ethanolamine phosphotransferase 1                               | Catalytic activity                              | Integral to membrane                             | Enzyme: Phosphotransferase          | Metabolism;Energy pathways                                                   | TM                 | Yes                      |
| CAPG        | 822     | macrophage-capping protein isoform 1                          | NP_001738.2       | 2          | 12                | 12         | 49     | 0.73                                                     | 0.77                                                     | 7.88                                                                                   | 8.81                                                                                   | 29.2                                                                                          | 35.1                                                                                          | 25                                                                             | 25                                                                             | 1088    | 822            | capping protein (actin filament), gelsolin-like                         | Cytoskeletal protein binding                    | Cytoplasm                                        | Cytoskeletal associated protein     | Cell growth and/or maintenance                                               | GEL                | Yes                      |
| TXNP        | 10628   | thioredoxin-interacting protein                               | NP_006463.3       | 1          | 2                 | 2          | 6      | 0.73                                                     | 0.77                                                     | 25.6                                                                                   | 16.4                                                                                   | 33.1                                                                                          | 22.1                                                                                          | 3                                                                              | 3                                                                              | 5964    | 10628          | thioredoxin interacting protein                                         | Molecular function unknown                      | Cytoplasm                                        | Cell cycle control protein          | Cell communication;Signal transduction                                       | -                  | Yes                      |
| MTX3        | 345778  | metaxin-3 isoform 1                                           | NP_001161213.1    | 2          | 1                 | 1          | 2      | 0.73                                                     | 0.77                                                     |                                                                                        |                                                                                        |                                                                                               |                                                                                               | 1                                                                              | 1                                                                              | 17614   | 345778         | metaxin 3                                                               | Molecular function unknown                      | -                                                | Unclassified                        | Biological process unknown                                                   | -                  | No                       |
| GABARAP     | 11337   | gamma-aminobutyric acid receptor-associated protein           | NP_009209.1       | 1          | 1                 | 1          | 1      | 0.73                                                     | 0.73                                                     |                                                                                        |                                                                                        |                                                                                               |                                                                                               | 1                                                                              | 1                                                                              | 5496    | 11337          | GABA(A) receptor-associated protein                                     | Molecular function unknown                      | Cytoplasm                                        | Unclassified                        | Transport                                                                    | -                  | No                       |
| ITGA3       | 3675    | integrin alpha-3 isoform a precursor                          | NP_002195.1       | 2          | 18                | 18         | 51     | 0.73                                                     | 0.71                                                     | 7.8                                                                                    | 10.72                                                                                  | 31.2                                                                                          | 42.8                                                                                          | 29                                                                             | 29                                                                             | 5431    | 3675           | integrin, alpha 3 (antigen CD49C, alpha 3 subunit of VLA-3 receptor)    | Receptor activity                               | Plasma membrane                                  | Cell surface receptor               | Cell communication;Signal transduction                                       | TM;INTAS;P         | Yes                      |
| DPP7        | 29952   | dipeptidyl peptidase 2 preproprotein                          | NP_037511.2       | 1          | 3                 | 3          | 6      | 0.73                                                     | 0.7                                                      | 12.27                                                                                  | 68.55                                                                                  | 15.7                                                                                          | 100.7                                                                                         | 3                                                                              | 3                                                                              | 7634    | 29952          | dipeptidylpeptidase 7                                                   | Serine-type peptidase activity                  | Lysosome                                         | Serine protease                     | Protein metabolism                                                           | SP                 | Yes                      |
| NDUFA13     | 51079   | NADH dehydrogenase [ubiquinone] 1 alpha subcomplex subunit 13 | NP_057049.5       | 1          | 4                 | 4          | 16     | 0.73                                                     | 0.66                                                     | 7.65                                                                                   | 11.7                                                                                   | 16.8                                                                                          | 23.4                                                                                          | 9                                                                              | 9                                                                              | 9452    | 51079          | None                                                                    | Oxidoreductase activity                         | Mitochondrion                                    | Enzyme: Oxidoreductase              | Metabolism;Energy pathways                                                   | TM                 | No                       |
| GSTK1       | 373156  | glutathione S-transferase kappa 1 isoform a                   | NP_057001.1       | 4          | 7                 | 7          | 27     | 0.73                                                     | 0.57                                                     | 9.63                                                                                   | 12.78                                                                                  | 27.7                                                                                          | 29                                                                                            | 15                                                                             | 15                                                                             | 13613   | 373156         | glutathione S-transferase kappa 1                                       | Glutathione transferase activity                | Peroxisome;Mitochondrion                         | Enzyme: Glutathione transferase     | Metabolism                                                                   | -                  | Yes                      |
| XPNPEP3     | 63929   | probable Xaa-Pro aminopeptidase 3 isoform 1                   | NP_071381.1       | 1          | 3                 | 4          | 11     | 0.72                                                     | 1.69                                                     | 23.75                                                                                  | 26.25                                                                                  | 24.6                                                                                          | 69.3                                                                                          | 2                                                                              | 2                                                                              | 10052   | 63929          | None                                                                    | Molecular function unknown                      | -                                                | Unclassified                        | Biological process unknown                                                   | -                  | No                       |
| ND2         | 4536    | NADH dehydrogenase subunit 2                                  | YP_003024027.1    | 1          | 1                 | 1          | 4      | 0.72                                                     | 1.53                                                     | 33.84                                                                                  | 3.84                                                                                   | 35.7                                                                                          | 8.3                                                                                           | 2                                                                              | 2                                                                              |         |                |                                                                         |                                                 |                                                  |                                     |                                                                              |                    |                          |
| PSEN1       | 5663    | presenilin-1 isoform 1-467                                    | NP_000012.1       | 2          | 1                 | 1          | 4      | 0.72                                                     | 1.25                                                     | 41.3                                                                                   | 2.76                                                                                   | 44.1                                                                                          | 4.9                                                                                           | 2                                                                              | 2                                                                              | 87      | 5663           | presenilin 1 (Alzheimer disease 3)                                      | Cell adhesion molecule activity                 | Endoplasmic reticulum;Nucleus;Cytoplasm          | Integral membrane protein           | Cell-cell adhesion                                                           | PSN;TM             | Yes                      |
| H2AFZ       | 3015    | histone H2A.Z                                                 | NP_002097.1       | 6          | 3                 | 5          | 23     | 0.72                                                     | 1.19                                                     | 12.77                                                                                  | 16.31                                                                                  | 24.8                                                                                          | 54.9                                                                                          | 7                                                                              | 7                                                                              | 823     | 3015           | H2A histone family, member Z                                            | DNA binding                                     | Nucleus                                          | DNA binding protein                 | Regulation of nucleobase, nucleoside, nucleotide and nucleic acid metabolism | -                  | Yes                      |
| ADH5        | 128     | alcohol dehydrogenase class-3                                 | NP_000662.3       | 1          | 12                | 12         | 49     | 0.72                                                     | 1.15                                                     | 9.16                                                                                   | 4.88                                                                                   | 35.8                                                                                          | 30.4                                                                                          | 28                                                                             | 28                                                                             | 64      | 128            | alcohol dehydrogenase 5 (class III), chondrocyte                        | Oxidoreductase activity                         | Cytoplasm                                        | Enzyme: Oxidoreductase              | Metabolism;Energy pathways                                                   | -                  | Yes                      |
| ORC1        | 4998    | origin recognition complex subunit 1 isoform 1                | NP_004144.2       | 2          | 1                 | 1          | 2      | 0.72                                                     | 1.11                                                     |                                                                                        |                                                                                        |                                                                                               |                                                                                               | 1                                                                              | 1                                                                              |         |                |                                                                         |                                                 |                                                  |                                     |                                                                              |                    |                          |
| RPF2        | 84154   | ribosome production factor 2 homolog isoform 1                | NP_115570.1       | 2          | 3                 | 3          | 7      | 0.72                                                     | 1.11                                                     | 13.23                                                                                  | 6.81                                                                                   | 21.7                                                                                          | 17.1                                                                                          | 5                                                                              | 5                                                                              | 12552   | 84154          | rbx domain containing 1                                                 | Molecular function unknown                      | Nucleolus                                        | Unclassified                        | Biological process unknown                                                   | -                  | No                       |
| YES1        | 7525    | tyrosine-protein kinase Yes                                   | NP_005424.1       | 50         | 2                 | 6          | 26     | 0.72                                                     | 1.07                                                     | 1.5                                                                                    | 14.79                                                                                  | 1.5                                                                                           | 22.6                                                                                          | 2                                                                              | 2                                                                              | 1285    | 7525           | v-yes-1 Yamaguchi sarcoma viral oncogene homolog 1                      | Protein-tyrosine kinase activity                | Cytoplasm                                        | Tyrosine kinase                     | Cell communication;Signal transduction                                       | SH3;SH2;Tyr_Kinase | Yes                      |
| CSNK1E      | 1454    | casein kinase 1 isoform epsilon                               | NP_001885.1       | 1          | 1                 | 4          | 6      | 0.72                                                     | 1.03                                                     |                                                                                        |                                                                                        |                                                                                               |                                                                                               | 1                                                                              | 1                                                                              | 2919    | 1454           | casein kinase 1, epsilon                                                | Protein serine/threonine kinase activity        | Cytoplasm                                        | Serine/threonine kinase             | DNA repair;Signal transduction                                               | S_T_kinase;NLS     | Yes                      |
| AURKA       | 6790    | aurora kinase A                                               | NP_003591.2       | 1          | 1                 | 1          | 2      | 0.72                                                     | 1.01                                                     |                                                                                        |                                                                                        |                                                                                               |                                                                                               | 1                                                                              | 1                                                                              | 4066    | 6790           | serine/threonine kinase 6                                               | Protein serine/threonine kinase activity        | Centrosome                                       | Serine/threonine kinase             | Cell communication;Signal transduction                                       | S_T_kinase         | Yes                      |
| GGH         | 8836    | gamma-glutamyl hydrolase precursor                            | NP_003869.1       | 1          | 5                 | 5          | 16     | 0.72                                                     | 1                                                        | 12.29                                                                                  | 11.18                                                                                  | 25.4                                                                                          | 32.3                                                                                          | 8                                                                              | 8                                                                              | 3299    | 8836           | gamma-glutamyl hydrolase (conjugase, folylpolygamma-glutamyl hydrolase) | Hydrolase activity                              | Lysosome                                         | Enzyme: Hydrolase                   | Metabolism;Energy pathways                                                   | SP                 | Yes                      |
| TANC1       | 85461   | protein TANC1 isoform 1                                       | NP_203752.2       | 1          | 1                 | 1          | 2      | 0.72                                                     | 1                                                        |                                                                                        |                                                                                        |                                                                                               |                                                                                               | 1                                                                              | 1                                                                              | 18146   | 85461          | None                                                                    | Molecular function unknown                      | Extracellular                                    | Unclassified                        | Biological process unknown                                                   | ANK;TPR;CC         | No                       |
| PRPF38A     | 84950   | pre-mRNA-splicing factor 38A                                  | NP_116253.2       | 1          | 1                 | 1          | 1      | 0.72                                                     | 0.97                                                     |                                                                                        |                                                                                        |                                                                                               |                                                                                               | 1                                                                              | 1                                                                              | 10972   | 84950          | PRPF38 pre-mRNA processing factor 38 (yeast) domain containing A        | Molecular function unknown                      | -                                                | Unclassified                        | Biological process unknown                                                   | CC                 | No                       |
| MRPL17      | 63875   | 39S ribosomal protein L17, mitochondrial                      | NP_071344.1       | 1          | 4                 | 4          | 9      | 0.72                                                     | 0.97                                                     | 6.52                                                                                   | 17.03                                                                                  | 8.2                                                                                           | 29.3                                                                                          | 3                                                                              | 3                                                                              | 10096   | 63875          | mitochondrial ribosomal protein L17                                     | Structural constituent of ribosome              | Mitochondrion                                    | Ribosomal subunit                   | Protein metabolism                                                           | -                  | No                       |
| SYNPO       | 11346   | synaptopodin isoform C                                        | NP_001159681.1    | 2          | 1                 | 6          | 12     | 0.72                                                     | 0.91                                                     |                                                                                        |                                                                                        |                                                                                               |                                                                                               | 1                                                                              | 1                                                                              | 12179   | 11346          | synaptopodin                                                            | Cytoskeletal protein binding                    | Cytoskeleton;Nucleus;Cytoplasm                   | Cytoskeletal associated protein     | Cell growth and/or maintenance                                               | -                  | Yes                      |
| RTN4        | 57142   | reticulon-4 isoform A                                         | NP_065393.1       | 5          | 7                 | 7          | 91     | 0.72                                                     | 0.91                                                     | 6.97                                                                                   | 5.76                                                                                   | 35                                                                                            | 36.2                                                                                          | 46                                                                             | 45                                                                             | 7259    | 57142          | reticulon 4                                                             | Protein binding                                 | Endoplasmic reticulum membrane;Nucleus;Cytoplasm | Integral membrane protein           | Regulation of cell growth                                                    | TM;CC              | Yes                      |
| NEDD4       | 4734    | E3 ubiquitin-protein ligase NEDD4 isoform 3                   | NP_001271267.1    | 5          | 4                 | 5          | 12     | 0.72                                                     | 0.89                                                     | 8.43                                                                                   | 3.13                                                                                   | 10.6                                                                                          | 4.8                                                                                           | 3                                                                              | 3                                                                              | 3786    | 4734           | neural precursor cell expressed, developmentally down-regulated 4       | Ubiquitin-specific protease activity            | Cytoplasm                                        | Ubiquitin proteasome system protein | Protein metabolism                                                           | WW;HECT;C2         | Yes                      |
| CLIC4       | 25932   | chloride intracellular channel protein 4                      | NP_039234.1       | 2          | 10                | 11         | 40     | 0.72                                                     | 0.89                                                     | 10.46                                                                                  | 15.66                                                                                  | 38.2                                                                                          | 76.6                                                                                          | 24                                                                             | 24                                                                             | 5943    | 25932          | chloride intracellular channel 4                                        | Intracellular ligand-gated ion channel activity | Cytoplasm                                        | Intracellular ligand-gated channel  | Transport                                                                    | -                  | Yes                      |
| MYO1D       | 4642    | unconventional myosin-1d isoform 1                            | NP_056009.1       | 3          | 10                | 10         | 17     | 0.72                                                     | 0.89                                                     | 18.52                                                                                  | 4.66                                                                                   | 46.8                                                                                          | 13.8                                                                                          | 11                                                                             | 11                                                                             | 7581    | 4642           | myosin 1D                                                               | Structural molecule activity                    | Cytoplasm                                        | Structural protein                  | Cell growth and/or maintenance                                               | IQ                 | Yes                      |

Supplementary Table S1. List of quantified proteins in OKF6/TERT1-Smoke cells  
 Raigopaln *et al.*, 2017. Role of protein kinase N2 (PKN2) in cigarette smoke-mediated oncogenic transformation of oral cells

| Gene Symbol | Gene ID   | Protein Description                                                                      | Protein Accession | # Proteins | # Unique Peptides | # Peptides | # PSMs | OKF6/TERT1-Smoke/<br>OKF6/TERT1-Parental<br>(130/126) R1 | OKF6/TERT1-Smoke/<br>OKF6/TERT1-Parental<br>(128/127) R2 | Ratio Standard Errors [%]:<br>OKF6/TERT1-Smoke/<br>OKF6/TERT1-Parental<br>(130/126) R1 | Ratio Standard Errors [%]:<br>OKF6/TERT1-Smoke/<br>OKF6/TERT1-Parental<br>(128/127) R2 | Ratio Variabilities [%]:<br>F13: OKF6/TERT1-<br>Smoke/<br>OKF6/TERT1-Parental<br>(130/126) R1 | Ratio Variabilities [%]:<br>F13: OKF6/TERT1-<br>Smoke/<br>OKF6/TERT1-Parental<br>(128/127) R2 | Ratio Counts: F13:<br>OKF6/TERT1-Smoke/<br>OKF6/TERT1-Parental<br>(130/126) R1 | Ratio Counts: F13:<br>OKF6/TERT1-Smoke/<br>OKF6/TERT1-Parental<br>(128/127) R2 | HPRD ID | Entrez Gene ID | Gene Name                                                                                       | Molecular Function                                           | Primary Localization  | Molecular Class                     | Biological Process                                                           | Domains                  | Plasma Proteome Database |  |
|-------------|-----------|------------------------------------------------------------------------------------------|-------------------|------------|-------------------|------------|--------|----------------------------------------------------------|----------------------------------------------------------|----------------------------------------------------------------------------------------|----------------------------------------------------------------------------------------|-----------------------------------------------------------------------------------------------|-----------------------------------------------------------------------------------------------|--------------------------------------------------------------------------------|--------------------------------------------------------------------------------|---------|----------------|-------------------------------------------------------------------------------------------------|--------------------------------------------------------------|-----------------------|-------------------------------------|------------------------------------------------------------------------------|--------------------------|--------------------------|--|
| PARP12      | 64761     | poly (ADP-ribose) polymerase 12                                                          | NP_073587.1       | 1          | 1                 | 1          | 1      | 0.72                                                     | 0.87                                                     |                                                                                        |                                                                                        |                                                                                               |                                                                                               | 1                                                                              | 1                                                                              | 15696   | 64761          | poly (ADP-ribose) polymerase family, member 12                                                  | DNA binding                                                  | -                     | DNA binding protein                 | Regulation of nucleobase, nucleoside, nucleotide and nucleic acid metabolism | ZnF_C3H1                 | Yes                      |  |
| SLC25A6     | 293       | ADP/ATP translocase 3                                                                    | NP_001627.2       | 2          | 1                 | 13         | 152    | 0.72                                                     | 0.86                                                     | 4.51                                                                                   | 4.71                                                                                   | 9.2                                                                                           | 11.4                                                                                          | 8                                                                              | 8                                                                              | 2461    | 293            | solute carrier family 25 (mitochondrial carrier, adenine nucleotide translocator), member 6     | Transporter activity                                         | Mitochondrion         | Transport/cargo protein             | Transport                                                                    | TM                       | Yes                      |  |
| RUFY1       | 80230     | RUN and FYVE domain-containing protein 1 isoform a                                       | NP_079434.3       | 10         | 13                | 13         | 26     | 0.72                                                     | 0.83                                                     | 11.21                                                                                  | 8.45                                                                                   | 32.3                                                                                          | 27.8                                                                                          | 15                                                                             | 15                                                                             | 15282   | 80230          | RUN and FYVE domain containing 1                                                                | Ubiquitin-specific protease activity                         | Endosome              | Ubiquitin proteasome system protein | Cell communication;Signal transduction                                       | CC:FYVE                  | Yes                      |  |
| ALDH3A1     | 218       | aldehyde dehydrogenase, dimeric NADP-prefering                                           | NP_000682.3       | 5          | 1                 | 2          | 4      | 0.72                                                     | 0.82                                                     |                                                                                        |                                                                                        |                                                                                               |                                                                                               | 1                                                                              | 1                                                                              | 4       | 218            | aldehyde dehydrogenase 3 family, member A1                                                      | Catalytic activity                                           | Cytoplasm             | Enzyme: Dehydrogenase               | Metabolism;Energy pathways                                                   | CC                       | Yes                      |  |
| ACAP2       | 23527     | arf-GAP with coiled-coil, ANK repeat and PH domain-containing protein 2                  | NP_036419.3       | 1          | 6                 | 6          | 11     | 0.72                                                     | 0.81                                                     | 10.85                                                                                  | 10.53                                                                                  | 22.3                                                                                          | 24.4                                                                                          | 8                                                                              | 8                                                                              | 9681    | 23527          | centaurin, beta 2                                                                               | GTase activator activity                                     | Cytoplasm             | GTase activating protein            | Cell communication;Signal transduction                                       | ANK;CC;ARFGAP            | Yes                      |  |
| TECR        | 9524      | very-long-chain enoyl-CoA reductase                                                      | NP_612510.1       | 1          | 6                 | 6          | 12     | 0.72                                                     | 0.81                                                     | 21.32                                                                                  | 4.65                                                                                   | 42.3                                                                                          | 9.9                                                                                           | 7                                                                              | 7                                                                              | 17076   | 9524           | glycoprotein, synaptic 2                                                                        | Catalytic activity                                           | Endoplasmic reticulum | Enzyme: Reductase                   | Metabolism;Energy pathways                                                   | TM                       | No                       |  |
| NEDD8-MDP1  | 100528064 | NEDD8-MDP1 protein                                                                       | NP_001186752.1    | 2          | 1                 | 1          | 4      | 0.72                                                     | 0.8                                                      | 10.94                                                                                  | 6.02                                                                                   | 13.6                                                                                          | 8.3                                                                                           | 3                                                                              | 3                                                                              |         |                |                                                                                                 |                                                              |                       |                                     |                                                                              |                          |                          |  |
| ELMOD2      | 255520    | ELMO domain-containing protein 2                                                         | NP_714913.1       | 1          | 2                 | 2          | 3      | 0.72                                                     | 0.78                                                     | 7.82                                                                                   | 4.85                                                                                   | 8                                                                                             | 5.3                                                                                           | 2                                                                              | 2                                                                              | 13267   | 255520         | ELMO domain containing 2                                                                        | Molecular function unknown                                   | -                     | Unclassified                        | Biological process unknown                                                   | -                        | No                       |  |
| ANXA2       | 302       | annexin A2 isoform 1                                                                     | NP_001002858.1    | 2          | 31                | 31         | 528    | 0.72                                                     | 0.78                                                     | 2.29                                                                                   | 2.38                                                                                   | 28.4                                                                                          | 32.3                                                                                          | 285                                                                            | 284                                                                            | 1061    | 302            | annexin A2                                                                                      | Calcium ion binding                                          | Nucleus               | Calcium binding protein             | Cell communication;Signal transduction                                       | ANX                      | Yes                      |  |
| KIAA1715    | 80856     | protein lunapark isoform 1 precursor                                                     | NP_001291937.1    | 5          | 4                 | 4          | 7      | 0.72                                                     | 0.74                                                     | 23.07                                                                                  | 24.13                                                                                  | 34.1                                                                                          | 36.9                                                                                          | 4                                                                              | 4                                                                              | 13886   | 80856          | KIAA1715                                                                                        | Protein binding                                              | Integral to membrane  | Integral membrane protein           | Biological process unknown                                                   | TM;CC                    | No                       |  |
| ACSF2       | 80221     | acyl-CoA synthetase family member 2, mitochondrial isoform 1                             | NP_001275897.1    | 5          | 8                 | 8          | 14     | 0.72                                                     | 0.74                                                     | 4.11                                                                                   | 17.08                                                                                  | 7.3                                                                                           | 31.7                                                                                          | 6                                                                              | 6                                                                              | 13380   | 80221          | None                                                                                            | Molecular function unknown                                   | -                     | Unclassified                        | Biological process unknown                                                   | SP                       | No                       |  |
| TMEM245     | 23731     | transmembrane protein 245                                                                | NP_114401.2       | 1          | 1                 | 1          | 2      | 0.72                                                     | 0.72                                                     |                                                                                        |                                                                                        |                                                                                               |                                                                                               | 1                                                                              | 1                                                                              |         |                |                                                                                                 |                                                              |                       |                                     |                                                                              |                          |                          |  |
| RAB9A       | 9367      | ras-related protein Rab-9A                                                               | NP_004242.1       | 2          | 1                 | 1          | 2      | 0.72                                                     | 0.71                                                     |                                                                                        |                                                                                        |                                                                                               |                                                                                               | 1                                                                              | 1                                                                              | 2236    | 9367           | RAB9A, member RAS oncogene family                                                               | Molecular function unknown                                   | Endosome              | Unclassified                        | Cell communication;Signal transduction                                       | RAB                      | No                       |  |
| RAC2        | 5880      | ras-related C3 botulinum toxin substrate 2                                               | NP_002863.1       | 3          | 4                 | 7          | 14     | 0.72                                                     | 0.71                                                     | 14.13                                                                                  | 13.85                                                                                  | 20.5                                                                                          | 19.9                                                                                          | 4                                                                              | 4                                                                              | 3628    | 5880           | ras-related C3 botulinum toxin substrate 2 (rho family, small GTP binding protein Rac2)         | GTase activity                                               | Plasma membrane       | GTase                               | Cell communication;Signal transduction                                       | RHO                      | Yes                      |  |
| ARHGAP21    | 57584     | rho GTPase-activating protein 21                                                         | NP_065875.3       | 1          | 1                 | 1          | 2      | 0.72                                                     | 0.68                                                     |                                                                                        |                                                                                        |                                                                                               |                                                                                               | 1                                                                              | 1                                                                              | 6445    | 57584          | Rho GTPase activating protein 21                                                                | GTase activator activity                                     | Golgi apparatus       | GTase activating protein            | Cell communication;Signal transduction                                       | PDZ;RHOGAP;PH            | Yes                      |  |
| MRC2        | 9902      | C-type mannose receptor 2 precursor                                                      | NP_006030.2       | 1          | 4                 | 4          | 5      | 0.72                                                     | 0.65                                                     | 29.76                                                                                  | 14.86                                                                                  | 38.2                                                                                          | 17                                                                                            | 3                                                                              | 3                                                                              | 10094   | 9902           | mannose receptor, C type 2                                                                      | Receptor activity                                            | Plasma membrane       | Cell surface receptor               | Biological process unknown                                                   | SP;FN2;LECTIN_C;TM;RICIN | Yes                      |  |
| SERPINA1    | 5265      | alpha-1-antitrypsin precursor                                                            | NP_000286.3       | 1          | 1                 | 1          | 2      | 0.72                                                     | 0.64                                                     |                                                                                        |                                                                                        |                                                                                               |                                                                                               | 1                                                                              | 1                                                                              | 2463    | 5265           | serine (or cysteine) proteinase inhibitor, clade A (alpha-1-antitrypsin, antitrypsin), member 1 | Protease inhibitor activity                                  | Extracellular         | Protease inhibitor                  | Protein metabolism                                                           | SP;SERPIN                | Yes                      |  |
| AHNAK2      | 113146    | protein AHNAK2                                                                           | NP_612429.2       | 1          | 89                | 89         | 213    | 0.72                                                     | 0.61                                                     | 4.15                                                                                   | 5.47                                                                                   | 32.6                                                                                          | 36.9                                                                                          | 114                                                                            | 114                                                                            | 12261   | 113146         | chromosome 14 open reading frame 78                                                             | Molecular function unknown                                   | Nucleus               | Unclassified                        | Transport                                                                    | PDZ                      | No                       |  |
| MSRA        | 4482      | mitochondrial peptide methionine sulfoxide reductase isoform a precursor                 | NP_036463.1       | 4          | 1                 | 1          | 2      | 0.72                                                     | 0.6                                                      |                                                                                        |                                                                                        |                                                                                               |                                                                                               | 1                                                                              | 1                                                                              | 3152    | 4482           | methionine sulfoxide reductase A                                                                | Catalytic activity                                           | Mitochondrion         | Enzyme: Reductase                   | Metabolism;Energy pathways                                                   | SP                       | Yes                      |  |
| SUN2        | 25777     | SUN domain-containing protein 2 isoform b                                                | NP_056189.1       | 2          | 13                | 14         | 31     | 0.72                                                     | 0.6                                                      | 12.56                                                                                  | 15.52                                                                                  | 36.3                                                                                          | 37.5                                                                                          | 15                                                                             | 15                                                                             | 15611   | 25777          | unc-84 homolog B (C. elegans)                                                                   | Molecular function unknown                                   | Integral to membrane  | Unclassified                        | Cell organization and biogenesis                                             | TM;CC                    | Yes                      |  |
| SET         | 6418      | protein SET isoform 2                                                                    | NP_003002.2       | 5          | 2                 | 13         | 47     | 0.71                                                     | 1.74                                                     | 11.65                                                                                  | 11.46                                                                                  | 11.7                                                                                          | 28.8                                                                                          | 2                                                                              | 2                                                                              | 9023    | 6418           | SET translocation (myeloid leukemia associated)                                                 | MHC class I receptor activity;MHC class II receptor activity | Nucleus               | MHC complex protein                 | Regulation of nucleobase, nucleoside, nucleotide and nucleic acid metabolism | CC                       | Yes                      |  |
| ERICH1      | 157697    | glutamate-rich protein 1 isoform 1                                                       | NP_997215.1       | 2          | 1                 | 1          | 3      | 0.71                                                     | 1.74                                                     | 30.41                                                                                  | 15.12                                                                                  | 31.1                                                                                          | 38.6                                                                                          | 2                                                                              | 2                                                                              | 14105   | 157697         | None                                                                                            | Molecular function unknown                                   | -                     | Unclassified                        | Biological process unknown                                                   | -                        | No                       |  |
| SLC30A1     | 7779      | zinc transporter 1                                                                       | NP_067017.2       | 1          | 4                 | 4          | 6      | 0.71                                                     | 1.32                                                     | 35.75                                                                                  | 3.11                                                                                   | 46.1                                                                                          | 7.1                                                                                           | 3                                                                              | 3                                                                              | 15366   | 7779           | solute carrier family 30 (zinc transporter), member 1                                           | Auxiliary transport protein activity                         | Integral to membrane  | Membrane transport protein          | Transport                                                                    | TM                       | Yes                      |  |
| ARL1        | 400       | ADP-ribosylation factor-like protein 1 isoform 1                                         | NP_001168.1       | 2          | 6                 | 6          | 21     | 0.71                                                     | 1.25                                                     | 14.89                                                                                  | 15.18                                                                                  | 34.4                                                                                          | 66                                                                                            | 10                                                                             | 10                                                                             | 4574    | 400            | ADP-ribosylation factor-like 1                                                                  | GTase activity                                               | Golgi apparatus       | GTase                               | Cell communication;Signal transduction                                       | ARF                      | Yes                      |  |
| NPC1        | 4864      | Niemann-Pick C1 protein precursor                                                        | NP_000262.2       | 1          | 8                 | 8          | 28     | 0.71                                                     | 1.12                                                     | 9.18                                                                                   | 7.98                                                                                   | 24.9                                                                                          | 34.4                                                                                          | 14                                                                             | 14                                                                             | 9622    | 4864           | Niemann-Pick disease, type C1                                                                   | Receptor activity                                            | Cytoplasm             | Cell surface receptor               | Cell communication;Signal transduction                                       | SP;TM                    | Yes                      |  |
| NDUFV1      | 4723      | NADH dehydrogenase [ubiquinone] flavoprotein 1, mitochondrial isoform 1 precursor        | NP_009034.2       | 2          | 11                | 11         | 20     | 0.71                                                     | 1.08                                                     | 17.49                                                                                  | 11.25                                                                                  | 45.3                                                                                          | 43.9                                                                                          | 12                                                                             | 12                                                                             | 1191    | 4723           | NADH dehydrogenase (ubiquinone) flavoprotein1, 51kDa                                            | Oxidoreductase activity                                      | Mitochondrion         | Enzyme: Oxidoreductase              | Metabolism;Energy pathways                                                   | -                        | No                       |  |
| ALDH6A1     | 4329      | methylmalonate-semialdehyde dehydrogenase [acylating], mitochondrial isoform 1 precursor | NP_005580.1       | 3          | 3                 | 3          | 6      | 0.71                                                     | 1.05                                                     | 11.25                                                                                  | 17.66                                                                                  | 13.9                                                                                          | 33.1                                                                                          | 3                                                                              | 3                                                                              | 4416    | 4329           | aldehyde dehydrogenase 6 family, member A1                                                      | Catalytic activity                                           | Mitochondrion         | Enzyme: Dehydrogenase               | Metabolism;Energy pathways                                                   | TM                       | Yes                      |  |

Supplementary Table S1. List of quantified proteins in OKF6/TERT1-Smoke cells  
 Raingopaln *et al.*, 2017. Role of protein kinase N2 (PKN2) in cigarette smoke-mediated oncogenic transformation of oral cells

| Gene Symbol | Gene ID | Protein Description                                                                   | Protein Accession | # Proteins | # Unique Peptides | # Peptides | # PSMs | OKF6/TERT1-Smoke/<br>OKF6/TERT1-Parental<br>(130/126) R1 | OKF6/TERT1-Smoke/<br>OKF6/TERT1-Parental<br>(128/127) R2 | Ratio Standard Errors [%]:<br>OKF6/TERT1-Smoke/<br>OKF6/TERT1-Parental<br>(130/126) R1 | Ratio Standard Errors [%]:<br>OKF6/TERT1-Smoke/<br>OKF6/TERT1-Parental<br>(128/127) R2 | Ratio Variabilities [%]:<br>F13: OKF6/TERT1-<br>Smoke/<br>OKF6/TERT1-Parental<br>(130/126) R1 | Ratio Variabilities [%]:<br>F13: OKF6/TERT1-<br>Smoke/<br>OKF6/TERT1-Parental<br>(128/127) R2 | Ratio Counts: F13:<br>OKF6/TERT1-Smoke/<br>OKF6/TERT1-Parental<br>(130/126) R1 | Ratio Counts: F13:<br>OKF6/TERT1-Smoke/<br>OKF6/TERT1-Parental<br>(128/127) R2 | HFPRD ID | Entrez Gene ID | Gene Name                                                                       | Molecular Function                       | Primary Localization                 | Molecular Class                     | Biological Process                                               | Domains           | Plasma Proteome Database |
|-------------|---------|---------------------------------------------------------------------------------------|-------------------|------------|-------------------|------------|--------|----------------------------------------------------------|----------------------------------------------------------|----------------------------------------------------------------------------------------|----------------------------------------------------------------------------------------|-----------------------------------------------------------------------------------------------|-----------------------------------------------------------------------------------------------|--------------------------------------------------------------------------------|--------------------------------------------------------------------------------|----------|----------------|---------------------------------------------------------------------------------|------------------------------------------|--------------------------------------|-------------------------------------|------------------------------------------------------------------|-------------------|--------------------------|
| PIH1D1      | 55011   | PIH1 domain-containing protein 1                                                      | NP_060386.1       | 1          | 1                 | 1          | 2      | 0.71                                                     | 1.04                                                     |                                                                                        |                                                                                        |                                                                                               |                                                                                               | 1                                                                              | 1                                                                              | 7938     | 55011          | None                                                                            | Molecular function unknown               | -                                    | Unclassified                        | Biological process unknown                                       | CC                | No                       |
| CD58        | 965     | lymphocyte function-associated antigen 3 isoform 1                                    | NP_001770.1       | 2          | 1                 | 1          | 1      | 0.71                                                     | 0.99                                                     |                                                                                        |                                                                                        |                                                                                               |                                                                                               | 1                                                                              | 1                                                                              | 1081     | 965            | CD58 antigen, (lymphocyte function-associated antigen 3)                        | Molecular function unknown               | Plasma membrane                      | Unclassified                        | Immune response                                                  | SP;IG;GPI;TM      | No                       |
| CORO1C      | 23603   | coronin-1C isoform a                                                                  | NP_001098707.1    | 3          | 16                | 17         | 81     | 0.71                                                     | 0.94                                                     | 6.59                                                                                   | 2.36                                                                                   | 31.3                                                                                          | 14.6                                                                                          | 43                                                                             | 43                                                                             | 9244     | 23603          | coronin, actin binding protein, 1C                                              | Cytoskeletal protein binding             | Cytoplasm                            | Cytoskeletal associated protein     | Cell growth and/or maintenance                                   | WD40              | Yes                      |
| TAOK1       | 57551   | serine/threonine-protein kinase TAO1 isoform 1                                        | NP_065842.1       | 5          | 1                 | 3          | 6      | 0.71                                                     | 0.89                                                     |                                                                                        |                                                                                        |                                                                                               |                                                                                               | 1                                                                              | 1                                                                              | 15467    | 57551          | TAO kinase 1                                                                    | Protein serine/threonine kinase activity | Nucleus                              | Serine/threonine kinase             | Cell communication;Signal transduction                           | S_T_kinase;CC     | No                       |
| PPIC        | 5480    | peptidyl-prolyl cis-trans isomerase C precursor                                       | NP_000934.1       | 1          | 3                 | 3          | 11     | 0.71                                                     | 0.84                                                     | 7.91                                                                                   | 3.3                                                                                    | 12.6                                                                                          | 6.2                                                                                           | 5                                                                              | 5                                                                              | 459      | 5480           | peptidylprolyl isomerase C (cyclophilin C)                                      | Chaperone activity                       | -                                    | Chaperone                           | Protein metabolism                                               | SP                | Yes                      |
| ANXA4       | 307     | annexin A4                                                                            | NP_001144.1       | 1          | 21                | 22         | 61     | 0.71                                                     | 0.8                                                      | 10.27                                                                                  | 3.33                                                                                   | 42.9                                                                                          | 15.1                                                                                          | 32                                                                             | 32                                                                             | 112      | 307            | annexin A4                                                                      | Calcium ion binding                      | Nucleus                              | Calcium binding protein             | Cell communication;Signal transduction                           | ANX               | Yes                      |
| NUP62       | 23636   | nuclear pore glycoprotein p62                                                         | NP_057637.2       | 1          | 1                 | 1          | 2      | 0.71                                                     | 0.77                                                     |                                                                                        |                                                                                        |                                                                                               |                                                                                               | 1                                                                              | 1                                                                              | 5782     | 23636          | nucleoporin 62kDa                                                               | Transporter activity                     | Nuclear membrane                     | Transport/cargo protein             | Transport                                                        | CC                | No                       |
| NDUFA9      | 4704    | NADH dehydrogenase [ubiquinone] 1 alpha subcomplex subunit 9, mitochondrial precursor | NP_004993.1       | 1          | 10                | 10         | 32     | 0.71                                                     | 0.76                                                     | 18.04                                                                                  | 15.15                                                                                  | 60.1                                                                                          | 53.6                                                                                          | 19                                                                             | 19                                                                             | 4832     | 4704           | NADH dehydrogenase (ubiquinone) 1 alpha subcomplex, 9, 39kDa                    | Oxidoreductase activity                  | Mitochondrion                        | Enzyme: Oxidoreductase              | Metabolism;Energy pathways                                       | -                 | Yes                      |
| TRIM25      | 7706    | E3 ubiquitin ligase TRIM25                                                            | NP_005073.2       | 1          | 21                | 21         | 63     | 0.71                                                     | 0.74                                                     | 5.61                                                                                   | 4.75                                                                                   | 22.8                                                                                          | 20                                                                                            | 32                                                                             | 32                                                                             | 2711     | 7706           | tripartite motif-containing 25                                                  | Transcription factor activity            | Nucleus                              | Transcription factor                | Regulation of nucleobase, nucleotide and nucleic acid metabolism | RING;CC;PRY;S_PRY | Yes                      |
| TOP2A       | 7153    | DNA topoisomerase 2-alpha                                                             | NP_001058.2       | 1          | 4                 | 11         | 30     | 0.71                                                     | 0.71                                                     | 9.94                                                                                   | 5.51                                                                                   | 14.3                                                                                          | 7.8                                                                                           | 4                                                                              | 4                                                                              | 536      | 7153           | topoisomerase (DNA) II alpha 170kDa                                             | DNA topoisomerase activity               | Nucleus                              | Enzyme: Topoisomerase               | Regulation of nucleobase, nucleotide and nucleic acid metabolism | CC                | Yes                      |
| LEMD2       | 221496  | LEM domain-containing protein 2 isoform 1                                             | NP_851853.1       | 1          | 4                 | 4          | 6      | 0.71                                                     | 0.71                                                     | 22.23                                                                                  | 5.69                                                                                   | 32.6                                                                                          | 8.1                                                                                           | 4                                                                              | 4                                                                              | 13984    | 221496         | LEM domain containing 2                                                         | Molecular function unknown               | Integral to membrane                 | Integral membrane protein           | Biological process unknown                                       | TM                | No                       |
| MOV10       | 4343    | putative helicase MOV-10 isoform 1                                                    | NP_001123551.1    | 2          | 9                 | 9          | 14     | 0.71                                                     | 0.7                                                      | 10.96                                                                                  | 8.87                                                                                   | 22.2                                                                                          | 17.8                                                                                          | 8                                                                              | 8                                                                              | 14732    | 4343           | Mov10, Moloney leukemia virus 10 homolog(mouse)                                 | Molecular function unknown               | Nucleus;Cytoplasm                    | Unclassified                        | Biological process unknown                                       | -                 | Yes                      |
| DDX60       | 55601   | probable ATP-dependent RNA helicase DDX60                                             | NP_060101.3       | 3          | 21                | 21         | 40     | 0.71                                                     | 0.7                                                      | 3.45                                                                                   | 7.75                                                                                   | 10.7                                                                                          | 23.9                                                                                          | 19                                                                             | 19                                                                             | 7877     | 55601          | None                                                                            | DNA binding                              | -                                    | DNA binding protein                 | Regulation of nucleobase, nucleotide and nucleic acid metabolism | DEXDc;HELIC       | Yes                      |
| FLRT2       | 23768   | leucine-rich repeat transmembrane protein FLRT2 precursor                             | NP_037363.1       | 1          | 3                 | 3          | 5      | 0.71                                                     | 0.68                                                     | 9                                                                                      | 5.02                                                                                   | 9.1                                                                                           | 4.8                                                                                           | 2                                                                              | 2                                                                              | 5312     | 23768          | fibronectin leucine rich transmembrane protein2                                 | Cell adhesion molecule activity          | Plasma membrane                      | Adhesion molecule                   | Cell communication;Signal transduction                           | SP;LRR;TM         | Yes                      |
| PYGL        | 5836    | glycogen phosphorylase, liver form isoform 1                                          | NP_002854.3       | 2          | 36                | 37         | 148    | 0.71                                                     | 0.68                                                     | 6.46                                                                                   | 6.98                                                                                   | 39.7                                                                                          | 41                                                                                            | 70                                                                             | 70                                                                             | 1987     | 5836           | phosphorylase, glycogen; liver (Hers disease, glycogen storage disease type VI) | Phosphorylase activity                   | -                                    | Enzyme: Phosphorylase               | Metabolism;Energy pathways                                       | -                 | Yes                      |
| REL         | 5966    | proto-oncogene c-Rel isoform 1                                                        | NP_002899.1       | 2          | 1                 | 1          | 1      | 0.71                                                     | 0.67                                                     |                                                                                        |                                                                                        |                                                                                               |                                                                                               | 1                                                                              | 1                                                                              | 1286     | 5966           | v-rel reticuloendotheliosis viral oncogene homolog (avian)                      | Transcription factor activity            | Nucleus                              | Transcription factor                | Regulation of nucleobase, nucleotide and nucleic acid metabolism | BP;TRHD           | Yes                      |
| DTX3L       | 151636  | E3 ubiquitin-protein ligase DTX3L                                                     | NP_612144.1       | 1          | 9                 | 9          | 14     | 0.71                                                     | 0.65                                                     | 14.48                                                                                  | 25.86                                                                                  | 25.5                                                                                          | 42.6                                                                                          | 6                                                                              | 6                                                                              | 16843    | 151636         | deltex 3-like (Drosophila)                                                      | Ubiquitin-specific protease activity     | Nucleus                              | Ubiquitin proteasome system protein | Protein metabolism                                               | RING;NLS;NES      | Yes                      |
| NDUFA6      | 4700    | NADH dehydrogenase [ubiquinone] 1 alpha subcomplex subunit 6                          | NP_002481.2       | 1          | 2                 | 2          | 5      | 0.71                                                     | 0.63                                                     | 8.89                                                                                   | 15.24                                                                                  | 10.9                                                                                          | 16.8                                                                                          | 3                                                                              | 3                                                                              | 11884    | 4700           | NADH dehydrogenase (ubiquinone) 1 alpha subcomplex, 6, 14kDa                    | Oxidoreductase activity                  | Mitochondrion                        | Enzyme: Oxidoreductase              | Metabolism;Energy pathways                                       | -                 | No                       |
| ADRF        | 10974   | adipogenesis regulatory factor                                                        | NP_006820.1       | 1          | 1                 | 1          | 2      | 0.71                                                     | 0.58                                                     |                                                                                        |                                                                                        |                                                                                               |                                                                                               | 1                                                                              | 1                                                                              |          |                |                                                                                 |                                          |                                      |                                     |                                                                  |                   |                          |
| RAB1B       | 81876   | ras-related protein Rab-1B                                                            | NP_112243.1       | 12         | 6                 | 14         | 143    | 0.7                                                      | 1.51                                                     | 17.82                                                                                  | 11.2                                                                                   | 67.7                                                                                          | 96.6                                                                                          | 24                                                                             | 23                                                                             | 11469    | 81876          | RAB1B, member RAS oncogene family                                               | GTPase activity                          | Golgi apparatus                      | GTPase                              | Cell communication;Signal transduction                           | RAB               | Yes                      |
| ADGRE5      | 976     | CD97 antigen isoform 1 preproprotein                                                  | NP_510966.1       | 3          | 1                 | 1          | 2      | 0.7                                                      | 1.39                                                     |                                                                                        |                                                                                        |                                                                                               |                                                                                               | 1                                                                              | 1                                                                              |          |                |                                                                                 |                                          |                                      |                                     |                                                                  |                   |                          |
| CAST        | 831     | calpastatin isoform m                                                                 | NP_00117371.1     | 4          | 2                 | 25         | 127    | 0.7                                                      | 1.37                                                     | 33.53                                                                                  | 2.42                                                                                   | 42.2                                                                                          | 5.8                                                                                           | 3                                                                              | 3                                                                              | 233      | 831            | calpastatin                                                                     | Protease inhibitor activity              | Nucleus;Cytoplasm;Perinuclear region | Protease inhibitor                  | Protein metabolism                                               | CC                | Yes                      |
| ESRP1       | 54845   | epithelial splicing regulatory protein 1 isoform 1                                    | NP_060167.2       | 5          | 3                 | 3          | 10     | 0.7                                                      | 1.08                                                     | 0.9                                                                                    | 2.19                                                                                   | 1.3                                                                                           | 4.7                                                                                           | 4                                                                              | 4                                                                              | 7881     | 54845          | None                                                                            | RNA binding                              | Nucleus                              | RNA binding protein                 | Biological process unknown                                       | RRM;SP            | No                       |
| COP57B      | 64708   | COP9 signalosome complex subunit 7b isoform b                                         | NP_073567.1       | 6          | 3                 | 3          | 4      | 0.7                                                      | 1.07                                                     | 28.28                                                                                  | 36.59                                                                                  | 28.7                                                                                          | 59.7                                                                                          | 2                                                                              | 2                                                                              | 9889     | 64708          | COP9 constitutive photomorphogenic homolog subunit 7B (Arabidopsis)             | Molecular function unknown               | Cytoplasm                            | Unclassified                        | Cell communication;Signal transduction                           | PINT;CC           | No                       |
| ADO         | 84890   | 2-aminoethanethiol dioxygenase                                                        | NP_116193.2       | 1          | 3                 | 3          | 4      | 0.7                                                      | 1.06                                                     | 1.71                                                                                   | 12.33                                                                                  | 2.1                                                                                           | 22.9                                                                                          | 3                                                                              | 3                                                                              | 12566    | 84890          | chromosome 10 open reading frame 23                                             | Molecular function unknown               | -                                    | Unclassified                        | Biological process unknown                                       | -                 | No                       |
| COMT        | 1312    | catechol O-methyltransferase isoform MB-COMT                                          | NP_000745.1       | 2          | 7                 | 7          | 32     | 0.7                                                      | 1.05                                                     | 12.02                                                                                  | 7.52                                                                                   | 34.5                                                                                          | 32.5                                                                                          | 16                                                                             | 16                                                                             | 284      | 1312           | catechol O-methyltransferase                                                    | Acytransferase activity                  | Endoplasmic reticulum;Cytoplasm      | Enzyme: Acyltransferase             | Metabolism;Energy pathways                                       | TM                | Yes                      |
| RAB12       | 201475  | ras-related protein Rab-12                                                            | NP_001020471.2    | 10         | 1                 | 2          | 35     | 0.7                                                      | 1                                                        |                                                                                        |                                                                                        |                                                                                               |                                                                                               | 1                                                                              | 1                                                                              | 18749    | 201475         | RAB12, member RAS oncogene family                                               | GTP binding                              | -                                    | G protein                           | Signal transduction                                              | RAB               | No                       |

Supplementary Table S1. List of quantified proteins in OKF6/TERT1-Smoke cells

Raijgonalan *et al.*, 2017. Role of protein kinase N2 (PKN2) in cigarette smoke-mediated oncogenic transformation of oral cells

| Gene Symbol | Gene ID | Protein Description                                                              | Protein Accession | # Proteins | # Unique Peptides | # Peptides | # PSMs | OKF6/TERT1-Smoke/<br>OKF6/TERT1-Parental<br>(130/126) R1 | OKF6/TERT1-Smoke/<br>OKF6/TERT1-Parental<br>(128/127) R2 | Ratio Standard Errors [%]:<br>OKF6/TERT1-Smoke/<br>OKF6/TERT1-Parental<br>(130/126) R1 | Ratio Standard Errors [%]:<br>OKF6/TERT1-Smoke/<br>OKF6/TERT1-Parental<br>(128/127) R2 | Ratio Variabilities [%]:<br>F13: OKF6/TERT1-<br>Smoke/<br>OKF6/TERT1-Parental<br>(130/126) R1 | Ratio Variabilities [%]:<br>F13: OKF6/TERT1-<br>Smoke/<br>OKF6/TERT1-Parental<br>(128/127) R2 | Ratio Counts: F13:<br>OKF6/TERT1-Smoke/<br>OKF6/TERT1-Parental<br>(130/126) R1 | Ratio Counts: F13:<br>OKF6/TERT1-Smoke/<br>OKF6/TERT1-Parental<br>(128/127) R2 | HPRD ID | Entrez Gene ID | Gene Name                                                                                        | Molecular Function                           | Primary Localization             | Molecular Class                 | Biological Process                                                           | Domains                | Plasma Proteome Database |
|-------------|---------|----------------------------------------------------------------------------------|-------------------|------------|-------------------|------------|--------|----------------------------------------------------------|----------------------------------------------------------|----------------------------------------------------------------------------------------|----------------------------------------------------------------------------------------|-----------------------------------------------------------------------------------------------|-----------------------------------------------------------------------------------------------|--------------------------------------------------------------------------------|--------------------------------------------------------------------------------|---------|----------------|--------------------------------------------------------------------------------------------------|----------------------------------------------|----------------------------------|---------------------------------|------------------------------------------------------------------------------|------------------------|--------------------------|
| CALD1       | 800     | caldesmon isoform 1                                                              | NP_149129.2       | 5          | 18                | 18         | 206    | 0.7                                                      | 0.99                                                     | 3.97                                                                                   | 3.06                                                                                   | 26.7                                                                                          | 28.4                                                                                          | 90                                                                             | 84                                                                             | 251     | 800            | caldesmon 1                                                                                      | Cytoskeletal protein binding                 | Cytoplasm/Nucleus                | Cytoskeletal associated protein | Cell growth and/or maintenance                                               | CC                     | Yes                      |
| NBAS        | 51594   | neuroblastoma-amplified sequence                                                 | NP_056993.2       | 1          | 6                 | 6          | 11     | 0.7                                                      | 0.92                                                     | 2.21                                                                                   | 15.02                                                                                  | 2.7                                                                                           | 28.3                                                                                          | 3                                                                              | 4                                                                              | 10473   | 51594          | None                                                                                             | Molecular function unknown                   | Mitochondrion                    | Unclassified                    | Biological processes unknown                                                 | CC                     | No                       |
| GNAI1       | 2770    | guanine nucleotide-binding protein (G $\alpha$ ) subunit alpha-1 isoform 1       | NP_002060.4       | 9          | 5                 | 9          | 60     | 0.7                                                      | 0.89                                                     | 13.65                                                                                  | 15.04                                                                                  | 29.4                                                                                          | 41.9                                                                                          | 9                                                                              | 9                                                                              | 756     | 2770           | guanine nucleotide binding protein (G $\alpha$ ) subunit alpha inhibiting activity polypeptide 1 | GTPase activity                              | Plasma membrane                  | G protein                       | Cell communication;Signal transduction                                       | GALP                   | Yes                      |
| MF12        | 4241    | melanotransferrin isoform 1 precursor                                            | NP_005920.2       | 2          | 4                 | 4          | 9      | 0.7                                                      | 0.86                                                     | 19.85                                                                                  | 15.44                                                                                  | 31.9                                                                                          | 30.2                                                                                          | 5                                                                              | 5                                                                              | 1122    | 4241           | antigen p97 (melanoma associated) identified monoclonal antibodies 133.2 and 96.5                | Molecular function unknown                   | Plasma membrane                  | Unclassified                    | Immune response                                                              | SP;TR_FER              | Yes                      |
| TGFBRAP1    | 9392    | transforming growth factor-beta receptor-associated protein 1                    | NP_004248.2       | 1          | 1                 | 1          | 2      | 0.7                                                      | 0.84                                                     |                                                                                        |                                                                                        |                                                                                               |                                                                                               | 1                                                                              | 1                                                                              | 6948    | 9392           | transforming growth factor, beta receptor-associated protein 1                                   | Chaperone activity                           | Cytoplasm                        | Chaperone                       | Protein metabolism                                                           | -                      | No                       |
| CRIP2       | 1397    | cysteine-rich protein 2 isoform 2                                                | NP_001257766.1    | 3          | 4                 | 4          | 10     | 0.7                                                      | 0.83                                                     | 10.66                                                                                  | 17.88                                                                                  | 16.7                                                                                          | 34                                                                                            | 5                                                                              | 5                                                                              | 3113    | 1397           | cysteine-rich protein 2                                                                          | Receptor signaling complex scaffold activity | Nucleus                          | Adapter molecule                | Regulation of nucleobase, nucleoside, nucleotide and nucleic acid metabolism | LIM                    | Yes                      |
| EXOC5       | 10640   | exocyst complex component 5                                                      | NP_006535.1       | 1          | 2                 | 2          | 4      | 0.7                                                      | 0.82                                                     | 9.97                                                                                   | 47.14                                                                                  | 9.9                                                                                           | 58.8                                                                                          | 2                                                                              | 2                                                                              | 7258    | 10640          | SEC10-like 1 (S. cerevisiae)                                                                     | Transporter activity                         | Cytoplasm                        | Transport/cargo protein         | Transport                                                                    | CC                     | Yes                      |
| RRM2        | 6241    | ribonucleoside-diphosphate reductase subunit M2 isoform 1                        | NP_001159403.1    | 2          | 2                 | 3          | 10     | 0.7                                                      | 0.82                                                     | 3.02                                                                                   | 16.4                                                                                   | 4.2                                                                                           | 27.3                                                                                          | 4                                                                              | 4                                                                              | 1587    | 6241           | ribonucleoside reductase M2 polypeptide                                                          | Oxidoreductase activity                      | Nucleus                          | Cell cycle control protein      | Regulation of nucleobase, nucleoside, nucleotide and nucleic acid metabolism | -                      | Yes                      |
| CKMT1A      | 548596  | creatine kinase U-type, mitochondrial precursor                                  | NP_001015001.1    | 2          | 22                | 23         | 68     | 0.7                                                      | 0.81                                                     | 11.62                                                                                  | 8.25                                                                                   | 51.1                                                                                          | 41.4                                                                                          | 35                                                                             | 35                                                                             | 18683   | 548596         | creatine kinase, mitochondrial 1A                                                                | Transferase activity                         | Mitochondrion                    | Enzyme: Phosphotransferase      | Energy pathways                                                              | SP                     | Yes                      |
| DSTN        | 11034   | destrin isoform a                                                                | NP_006861.1       | 2          | 5                 | 5          | 11     | 0.7                                                      | 0.79                                                     | 11.98                                                                                  | 3.43                                                                                   | 22.4                                                                                          | 7.1                                                                                           | 7                                                                              | 7                                                                              | 16446   | 11034          | destrin (actin depolymerizing factor)                                                            | Cytoskeletal protein binding                 | Nucleus                          | Cytoskeletal associated protein | Cell growth and/or maintenance                                               | ADF                    | Yes                      |
| PARP9       | 83666   | poly [ADP-ribose] polymerase 9 isoform b                                         | NP_001139575.1    | 3          | 12                | 12         | 23     | 0.7                                                      | 0.78                                                     | 14.26                                                                                  | 14.36                                                                                  | 35.8                                                                                          | 40.2                                                                                          | 12                                                                             | 12                                                                             | 10686   | 83666          | poly (ADP-ribose) polymerase family, member 9                                                    | Molecular function unknown                   | Nucleus                          | Unclassified                    | Biological processes unknown                                                 | -                      | Yes                      |
| GBAS        | 2631    | protein NipSnap homolog 2 isoform 1                                              | NP_001474.1       | 2          | 3                 | 3          | 3      | 0.7                                                      | 0.75                                                     | 1.46                                                                                   | 19.62                                                                                  | 1.4                                                                                           | 21                                                                                            | 2                                                                              | 2                                                                              | 4302    | 2631           | glioblastoma amplified sequence                                                                  | Molecular function unknown                   | Plasma membrane                  | Unclassified                    | Cell communication;Signal transduction                                       | SP;TM                  | Yes                      |
| FERMT1      | 55612   | fermitin family homolog 1                                                        | NP_060141.3       | 1          | 11                | 12         | 36     | 0.7                                                      | 0.75                                                     | 12.73                                                                                  | 8.36                                                                                   | 37.8                                                                                          | 26.1                                                                                          | 17                                                                             | 17                                                                             | 6388    | 55612          | chromosome 20 open reading frame 42                                                              | Structural molecule activity                 | Cytoplasm                        | Structural protein              | Cell growth and/or maintenance                                               | PH                     | Yes                      |
| ALDH4A1     | 8659    | delta-1-pyrroline-5-carboxylate dehydrogenase, mitochondrial isoform a precursor | NP_003739.2       | 2          | 13                | 13         | 30     | 0.7                                                      | 0.72                                                     | 7.68                                                                                   | 5.12                                                                                   | 22.4                                                                                          | 15.4                                                                                          | 17                                                                             | 17                                                                             | 6009    | 8659           | aldehyde dehydrogenase 4 family, member A1                                                       | Catalytic activity                           | Mitochondrion                    | Enzyme: Dehydrogenase           | Metabolism;Energy pathways                                                   | -                      | Yes                      |
| PNPLA2      | 57104   | patatin-like phospholipase domain-containing protein 2                           | NP_065109.1       | 1          | 1                 | 1          | 2      | 0.7                                                      | 0.71                                                     |                                                                                        |                                                                                        |                                                                                               |                                                                                               | 1                                                                              | 1                                                                              | 11443   | 57104          | patatin-like phospholipase domain containing 2                                                   | Hydrolase activity                           | Cytoplasm                        | Enzyme: Hydrolase               | Metabolism;Energy pathways                                                   | TM                     | No                       |
| IL1RAP      | 3556    | interleukin-1 receptor accessory protein isoform 3 precursor                     | NP_001161403.1    | 3          | 2                 | 2          | 5      | 0.7                                                      | 0.71                                                     | 8.94                                                                                   | 10.78                                                                                  | 10.8                                                                                          | 13.3                                                                                          | 3                                                                              | 3                                                                              | 4021    | 3556           | interleukin 1 receptor accessory protein                                                         | Receptor activity                            | Plasma membrane;Soluble fraction | Cell surface receptor           | Immune response                                                              | TM;IG;TIR;SP           | Yes                      |
| TEP1        | 7011    | telomerase protein component 1                                                   | NP_009041.2       | 1          | 2                 | 2          | 4      | 0.7                                                      | 0.68                                                     | 23.86                                                                                  | 47.25                                                                                  | 23.8                                                                                          | 48.2                                                                                          | 2                                                                              | 2                                                                              | 3404    | 7011           | telomerase-associated protein 1                                                                  | RNA binding                                  | Nucleus                          | RNA binding protein             | Regulation of nucleobase, nucleoside, nucleotide and nucleic acid metabolism | WD40                   | Yes                      |
| COL7A1      | 1294    | collagen alpha-1(VII) chain precursor                                            | NP_000085.1       | 1          | 14                | 14         | 28     | 0.7                                                      | 0.66                                                     | 10.84                                                                                  | 12.47                                                                                  | 26.9                                                                                          | 29.2                                                                                          | 12                                                                             | 12                                                                             | 358     | 1294           | collagen, type VII, alpha 1 (epidermolysis bullosa, dystrophic, dominant and recessive)          | Extracellular matrix structural constituent  | Extracellular                    | Extracellular matrix protein    | Cell growth and/or maintenance                                               | VWA;FN3;COLL;KUNITZ;SP | Yes                      |
| TRIP10      | 9322    | cdc42-interacting protein 4 isoform 1                                            | NP_001275891.1    | 1          | 1                 | 19         | 46     | 0.7                                                      | 0.57                                                     |                                                                                        |                                                                                        |                                                                                               |                                                                                               | 1                                                                              | 1                                                                              | 5142    | 9322           | thyroid hormone receptor interactor 10                                                           | Receptor signaling complex scaffold activity | Cytoplasm                        | Adapter molecule                | Cell growth and/or maintenance                                               | FES;CC;SH3             | Yes                      |
| FAT2        | 2196    | protocadherin Fat 2 precursor                                                    | NP_001438.1       | 1          | 22                | 22         | 39     | 0.7                                                      | 0.57                                                     | 17.56                                                                                  | 15.83                                                                                  | 65.9                                                                                          | 46.3                                                                                          | 24                                                                             | 24                                                                             | 5041    | 2196           | FAT tumor suppressor homolog 2 (Drosophila)                                                      | Cell adhesion molecule activity              | -                                | Adhesion molecule               | Cell communication;Signal transduction                                       | Cadherin;LAMG;EGF;TM   | Yes                      |
| ITGA5       | 3678    | integrin alpha-5 precursor                                                       | NP_002196.2       | 1          | 4                 | 4          | 8      | 0.7                                                      | 0.57                                                     | 10.9                                                                                   | 11.13                                                                                  | 17.1                                                                                          | 14.3                                                                                          | 5                                                                              | 5                                                                              | 627     | 3678           | integrin, alpha 5 (fibronectin receptor, alpha5 polypeptide)                                     | Receptor activity                            | Plasma membrane                  | Cell surface receptor           | Cell communication;Signal transduction                                       | INTA;SP;TM             | Yes                      |
| MAP6        | 4135    | microtubule-associated protein 6 isoform 1                                       | NP_149052.1       | 1          | 1                 | 1          | 1      | 0.69                                                     | 1.63                                                     |                                                                                        |                                                                                        |                                                                                               |                                                                                               | 1                                                                              | 1                                                                              | 15989   | 4135           | microtubule-associated protein 6                                                                 | Cytoskeletal protein binding                 | Cytoskeleton                     | Cytoskeletal associated protein | Cell growth and/or maintenance                                               | -                      | No                       |
| CIC         | 23152   | protein capicua homolog isoform CIC-L                                            | NP_001291744.1    | 2          | 2                 | 2          | 4      | 0.69                                                     | 1.31                                                     | 42.1                                                                                   | 30.68                                                                                  | 42.6                                                                                          | 61.5                                                                                          | 2                                                                              | 2                                                                              | 10831   | 23152          | capicua homolog (Drosophila)                                                                     | Transcription factor activity                | Nucleus/Cytoplasm                | Transcription factor            | Regulation of nucleobase, nucleoside, nucleotide and nucleic acid metabolism | HMG                    | No                       |
| RSU1        | 6251    | ras suppressor protein 1 isoform 1                                               | NP_036557.1       | 2          | 5                 | 5          | 14     | 0.69                                                     | 0.94                                                     | 7.54                                                                                   | 5.29                                                                                   | 14.7                                                                                          | 14.1                                                                                          | 8                                                                              | 8                                                                              | 1551    | 6251           | Ras suppressor protein 1                                                                         | Molecular function unknown                   | -                                | Unclassified                    | Cell adhesion;Signal transduction                                            | LRR                    | Yes                      |

Supplementary Table S1. List of quantified proteins in OKF6/TERT1-Smoke cells  
 Raingopaln *et al.*, 2017. Role of protein kinase N2 (PKN2) in cigarette smoke-mediated oncogenic transformation of oral cells

| Gene Symbol | Gene ID | Protein Description                                                | Protein Accession | # Proteins | # Unique Peptides | # Peptides | # PSMs | OKF6/TERT1-Smoke/<br>OKF6/TERT1-Parental<br>(130/126) R1 | OKF6/TERT1-Smoke/<br>OKF6/TERT1-Parental<br>(128/127) R2 | Ratio Standard Errors [%]:<br>OKF6/TERT1-Smoke/<br>OKF6/TERT1-Parental<br>(130/126) R1 | Ratio Standard Errors [%]:<br>OKF6/TERT1-Smoke/<br>OKF6/TERT1-Parental<br>(128/127) R2 | Ratio Variabilities [%]:<br>F13: OKF6/TERT1-<br>Smoke/<br>OKF6/TERT1-Parental<br>(130/126) R1 | Ratio Variabilities [%]:<br>F13: OKF6/TERT1-<br>Smoke/<br>OKF6/TERT1-Parental<br>(128/127) R2 | Ratio Counts: F13:<br>OKF6/TERT1-Smoke/<br>OKF6/TERT1-Parental<br>(130/126) R1 | Ratio Counts: F13:<br>OKF6/TERT1-Smoke/<br>OKF6/TERT1-Parental<br>(128/127) R2 | HPRD ID | Entrez Gene ID | Gene Name                                                                                | Molecular Function                                      | Primary Localization  | Molecular Class                                    | Biological Process                                                           | Domains                        | Plasma Proteome Database |
|-------------|---------|--------------------------------------------------------------------|-------------------|------------|-------------------|------------|--------|----------------------------------------------------------|----------------------------------------------------------|----------------------------------------------------------------------------------------|----------------------------------------------------------------------------------------|-----------------------------------------------------------------------------------------------|-----------------------------------------------------------------------------------------------|--------------------------------------------------------------------------------|--------------------------------------------------------------------------------|---------|----------------|------------------------------------------------------------------------------------------|---------------------------------------------------------|-----------------------|----------------------------------------------------|------------------------------------------------------------------------------|--------------------------------|--------------------------|
| ACTN1       | 87      | alpha-actinin-1 isoform b                                          | NP_001093.1       | 3          | 36                | 59         | 412    | 0.69                                                     | 0.9                                                      | 4.5                                                                                    | 5.74                                                                                   | 34.6                                                                                          | 60.6                                                                                          | 118                                                                            | 118                                                                            | 20      | 87             | actinin, alpha 1                                                                         | Cytoskeletal protein binding                            | Cytoplasm             | Cytoskeletal associated protein;Structural protein | Cell growth and/or maintenance                                               | CHSPECTRIN;EF                  | Yes                      |
| PKM         | 5315    | pyruvate kinase PKM isoform c                                      | NP_001193725.1    | 5          | 6                 | 42         | 578    | 0.69                                                     | 0.82                                                     | 6.03                                                                                   | 22.49                                                                                  | 13.2                                                                                          | 63.4                                                                                          | 10                                                                             | 10                                                                             |         |                |                                                                                          |                                                         |                       |                                                    |                                                                              |                                |                          |
| PSMB9       | 5698    | proteasome subunit beta type-9 precursor                           | NP_002791.1       | 1          | 2                 | 2          | 2      | 0.69                                                     | 0.8                                                      | 108.61                                                                                 | 63.78                                                                                  | 144.8                                                                                         | 83.3                                                                                          | 2                                                                              | 2                                                                              | 1514    | 5698           | proteasome (prosome, macropain) subunit, beta type, 9 (large multifunctional protease 2) | Transcription regulator activity                        | Nucleus               | Transcription regulatory protein                   | Cell cycle                                                                   | -                              | Yes                      |
| TBC1D10B    | 26000   | TBC1 domain family member 10B                                      | NP_056342.3       | 1          | 2                 | 2          | 3      | 0.69                                                     | 0.76                                                     | 55.58                                                                                  | 21.54                                                                                  | 58.7                                                                                          | 23.5                                                                                          | 2                                                                              | 2                                                                              | 10892   | 26000          | TBC1 domain family, member 10B                                                           | GTPase activator                                        | -                     | GTPase activating protein                          | Cell communication;Signal transduction                                       | TBC,CC                         | No                       |
| DCARD       | 79877   | diphospho-CoA kinase domain-containing protein                     | NP_001275583.1    | 1          | 3                 | 3          | 6      | 0.69                                                     | 0.74                                                     | 2.87                                                                                   | 5.99                                                                                   | 3.4                                                                                           | 7.7                                                                                           | 3                                                                              | 3                                                                              | 8012    | 79877          | None                                                                                     | Kinase activity                                         | -                     | Enzyme: Phosphorylase                              | Biological process unknown                                                   | TM                             | No                       |
| PTK7        | 5754    | inactive tyrosine-protein kinase 7 isoform e                       | NP_001257327.1    | 5          | 5                 | 5          | 6      | 0.69                                                     | 0.74                                                     | 10.82                                                                                  | 19.5                                                                                   | 16.9                                                                                          | 33.1                                                                                          | 5                                                                              | 5                                                                              | 3534    | 5754           | PTK7 protein tyrosine kinase 7                                                           | Transmembrane receptor protein tyrosine kinase activity | Plasma membrane       | Receptor tyrosine kinase                           | Cell communication;Signal transduction                                       | IGC2;lg_LIKE;Ty_r_Kinase;TM;SP | Yes                      |
| SLC25A20    | 788     | mitochondrial carnitine/acylcarnitine carrier protein              | NP_000378.1       | 1          | 1                 | 1          | 3      | 0.69                                                     | 0.71                                                     |                                                                                        |                                                                                        |                                                                                               |                                                                                               | 1                                                                              | 1                                                                              | 1953    | 788            | solute carrier family 25 (carnitine/acylcarnitine translocase), member 20                | Catalytic activity                                      | Mitochondrion         | Enzyme: Translocase                                | Metabolism;Energy pathways                                                   | TM                             | Yes                      |
| SLC39A10    | 57181   | zinc transporter ZIP10 precursor                                   | NP_065075.1       | 1          | 1                 | 1          | 2      | 0.69                                                     | 0.71                                                     |                                                                                        |                                                                                        |                                                                                               |                                                                                               | 1                                                                              | 1                                                                              | 10572   | 57181          | solute carrier family 39 (zinc transporter), member 10                                   | Auxiliary transport protein activity                    | Plasma membrane       | Membrane transport protein                         | Transport                                                                    | TM                             | No                       |
| MAPKAPK3    | 7867    | MAP kinase-activated protein kinase 3                              | NP_004626.1       | 4          | 4                 | 5          | 8      | 0.69                                                     | 0.71                                                     | 48.83                                                                                  | 35.67                                                                                  | 64                                                                                            | 37                                                                                            | 3                                                                              | 2                                                                              | 3678    | 7867           | mitogen-activated protein kinase-activated protein kinase 3                              | Protein serine/threonine kinase activity                | Nucleus               | Serine/threonine kinase                            | Cell communication;Signal transduction                                       | S_T_Kinase;NLS                 | No                       |
| MAOA        | 4128    | amine oxidase [flavin-containing] A isoform 1                      | NP_000231.1       | 3          | 11                | 11         | 21     | 0.69                                                     | 0.7                                                      | 5.59                                                                                   | 11.82                                                                                  | 13.3                                                                                          | 29.5                                                                                          | 12                                                                             | 12                                                                             | 2400    | 4128           | monoamine oxidase A                                                                      | Catalytic activity                                      | Mitochondrion         | Enzyme: Oxidase                                    | Metabolism;Energy pathways                                                   | -                              | Yes                      |
| HLA-C       | 3107    | HLA class I histocompatibility antigen, Cw-1 alpha chain precursor | NP_001229971.1    | 2          | 8                 | 12         | 35     | 0.69                                                     | 0.69                                                     | 12.13                                                                                  | 12.88                                                                                  | 28.3                                                                                          | 30.2                                                                                          | 11                                                                             | 11                                                                             | 829     | 3107           | MHC class I major histocompatibility complex, class I, C                                 | MHC receptor activity;MHC class II receptor activity    | Plasma membrane       | MHC complex protein                                | Immune response                                                              | SP;IGC;TM                      | Yes                      |
| F11R        | 50848   | junctional adhesion molecule A precursor                           | NP_058642.1       | 1          | 10                | 10         | 25     | 0.69                                                     | 0.67                                                     | 9.65                                                                                   | 5.92                                                                                   | 25.1                                                                                          | 14.8                                                                                          | 14                                                                             | 14                                                                             | 12038   | 50848          | F11 receptor                                                                             | Cell adhesion molecule activity                         | Cell junction         | Adhesion molecule                                  | Cell communication;Signal transduction                                       | IGV;lg_LIKE;TM;SP              | Yes                      |
| GLUL        | 2752    | glutamine synthetase                                               | NP_002056.2       | 1          | 4                 | 4          | 10     | 0.69                                                     | 0.67                                                     | 32.52                                                                                  | 22.93                                                                                  | 53.4                                                                                          | 35.3                                                                                          | 5                                                                              | 5                                                                              | 701     | 2752           | glutamate-ammonia ligase (glutamine synthetase)                                          | Transaminase activity                                   | Cytosol               | Enzyme: Aminotransferase                           | Metabolism;Energy pathways                                                   | -                              | Yes                      |
| FAM83B      | 222584  | protein FAM83B                                                     | NP_001010872.1    | 1          | 10                | 10         | 15     | 0.69                                                     | 0.65                                                     | 7.8                                                                                    | 7.46                                                                                   | 16.2                                                                                          | 14.7                                                                                          | 9                                                                              | 9                                                                              | 10158   | 222584         | chromosome 6 open reading frame 143                                                      | Molecular function unknown                              | -                     | Unclassified                                       | Biological process unknown                                                   | -                              | Yes                      |
| ABHD14B     | 84836   | alpha/beta hydrolase domain-containing protein 14B isoform 1       | NP_116139.1       | 2          | 3                 | 3          | 7      | 0.69                                                     | 0.65                                                     | 24.46                                                                                  | 26.83                                                                                  | 34.8                                                                                          | 36.2                                                                                          | 4                                                                              | 4                                                                              | 17504   | 84836          | None                                                                                     | Molecular function unknown                              | -                     | Unclassified                                       | Biological process unknown                                                   | -                              | Yes                      |
| IMPACT      | 55364   | protein IMPACT                                                     | NP_060909.1       | 1          | 1                 | 1          | 2      | 0.69                                                     | 0.58                                                     |                                                                                        |                                                                                        |                                                                                               |                                                                                               | 1                                                                              | 1                                                                              | 13739   | 55364          | None                                                                                     | Molecular function unknown                              | -                     | Unclassified                                       | Biological process unknown                                                   | RWD                            | No                       |
| GANAB       | 23193   | neutral alpha-glucosidase AB isoform 3 precursor                   | NP_938149.2       | 2          | 1                 | 36         | 142    | 0.68                                                     | 1.43                                                     | 1.53                                                                                   | 4.69                                                                                   | 1.5                                                                                           | 9.5                                                                                           | 2                                                                              | 2                                                                              | 3516    | 23193          | glucosidase, alpha; neutral AB                                                           | Hydrolase activity                                      | Endoplasmic reticulum | Enzyme: Hydrolase                                  | Carbohydrate metabolism                                                      | SP                             | Yes                      |
| C2CD5       | 9847    | C2 domain-containing protein 5 isoform b                           | NP_001273104.1    | 5          | 1                 | 1          | 2      | 0.68                                                     | 1.3                                                      |                                                                                        |                                                                                        |                                                                                               |                                                                                               | 1                                                                              | 1                                                                              |         |                |                                                                                          |                                                         |                       |                                                    |                                                                              |                                |                          |
| FRMD6       | 122786  | FERM domain-containing protein 6 isoform 2                         | NP_001253975.1    | 2          | 1                 | 1          | 2      | 0.68                                                     | 1.07                                                     |                                                                                        |                                                                                        |                                                                                               |                                                                                               | 1                                                                              | 1                                                                              | 12646   | 122786         | chromosome 14 open reading frame 31                                                      | Molecular function unknown                              | Plasma membrane       | Unclassified                                       | Biological process unknown                                                   | B41                            | Yes                      |
| PTPN6       | 5777    | tyrosine-protein phosphatase non-receptor type 6 isoform 3         | NP_536859.1       | 3          | 2                 | 2          | 4      | 0.68                                                     | 1.04                                                     | 56.2                                                                                   | 5.89                                                                                   | 58.4                                                                                          | 8.7                                                                                           | 2                                                                              | 2                                                                              | 1475    | 5777           | protein tyrosine phosphatase, non-receptor type6                                         | Protein tyrosine phosphatase activity                   | Cytoplasm             | Tyrosine phosphatase                               | Cell communication;Signal transduction                                       | SH2;Tyr_Phosph                 | Yes                      |
| PDCD4       | 27250   | programmed cell death protein 4 isoform 1                          | NP_055271.2       | 3          | 12                | 12         | 31     | 0.68                                                     | 0.82                                                     | 13.26                                                                                  | 9.89                                                                                   | 37.2                                                                                          | 33.3                                                                                          | 16                                                                             | 16                                                                             | 10549   | 27250          | programmed cell death 4 (neoplastic transformation inhibitor)                            | Molecular function unknown                              | Nucleus;Cytoplasm     | Unclassified                                       | Apoptosis                                                                    | MA3                            | Yes                      |
| PRDX5       | 25824   | peroxiredoxin-5, mitochondrial isoform a precursor                 | NP_036226.1       | 3          | 12                | 12         | 66     | 0.68                                                     | 0.8                                                      | 9.84                                                                                   | 10.16                                                                                  | 38.5                                                                                          | 47.9                                                                                          | 31                                                                             | 31                                                                             | 5958    | 25824          | peroxiredoxin 5                                                                          | Oxidoreductase activity                                 | Mitochondrion         | Enzyme: Oxidoreductase                             | Metabolism;Energy pathways                                                   | -                              | Yes                      |
| REXO2       | 25996   | oligoribonuclease, mitochondrial precursor                         | NP_056338.2       | 1          | 1                 | 1          | 1      | 0.68                                                     | 0.8                                                      |                                                                                        |                                                                                        |                                                                                               |                                                                                               | 1                                                                              | 1                                                                              | 6192    | 25996          | None                                                                                     | Ribonuclease activity                                   | Mitochondrion         | Ribonuclease                                       | Regulation of nucleobase, nucleoside, nucleotide and nucleic acid metabolism | EXOIII                         | Yes                      |
| NUB1        | 51667   | NEDD8 ultimate buster 1 isoform 1                                  | NP_001230280.1    | 2          | 2                 | 2          | 4      | 0.68                                                     | 0.76                                                     | 51.06                                                                                  | 22.37                                                                                  | 52.6                                                                                          | 24.3                                                                                          | 2                                                                              | 2                                                                              | 7450    | 51667          | None                                                                                     | Ubiquitin-specific protease activity                    | Nucleus               | Ubiquitin proteasome system protein                | Protein metabolism                                                           | CC;UBA;NLS                     | Yes                      |
| MGST2       | 4258    | microsomal glutathione S-transferase 2 isoform 1 precursor         | NP_002404.1       | 2          | 2                 | 2          | 5      | 0.68                                                     | 0.75                                                     | 1.91                                                                                   | 11.61                                                                                  | 2.3                                                                                           | 15.2                                                                                          | 3                                                                              | 3                                                                              | 3436    | 4258           | microsomal glutathione S-transferase 2                                                   | Glutathione transferase activity                        | Endoplasmic reticulum | Enzyme: Glutathione transferase                    | Metabolism;Energy pathways                                                   | SP;TM                          | Yes                      |
| ANO1        | 55107   | anoctamin-1                                                        | NP_060513.5       | 1          | 1                 | 1          | 1      | 0.68                                                     | 0.73                                                     |                                                                                        |                                                                                        |                                                                                               |                                                                                               | 1                                                                              | 1                                                                              | 18202   | 55107          | transmembrane protein 16A                                                                | Molecular function unknown                              | Integral to membrane  | Integral membrane protein                          | Biological process unknown                                                   | TM                             | Yes                      |
| SUB1        | 10923   | activated RNA polymerase II transcriptional coactivator p15        | NP_006704.3       | 1          | 6                 | 6          | 17     | 0.68                                                     | 0.72                                                     | 6.14                                                                                   | 10.94                                                                                  | 11.1                                                                                          | 21.2                                                                                          | 7                                                                              | 7                                                                              | 2737    | 10923          | None                                                                                     | Transcription factor activity                           | Nucleus               | Transcription factor                               | Regulation of nucleobase, nucleoside, nucleotide and nucleic acid metabolism | -                              | Yes                      |
| P14KA       | 5297    | phosphatidylinositol 4-kinase alpha                                | NP_477352.3       | 1          | 2                 | 2          | 4      | 0.68                                                     | 0.7                                                      |                                                                                        |                                                                                        |                                                                                               |                                                                                               | 1                                                                              | 1                                                                              | 8972    | 5297           | phosphatidylinositol 4-kinase catalytic alpha polypeptide                                | Lipid kinase activity                                   | Golgi apparatus       | Lipid Kinase                                       | Cell communication;Signal transduction                                       | PI3KA;PI3KC                    | Yes                      |

Supplementary Table S1. List of quantified proteins in OKF6/TERT1-Smoke cells  
 Raingopaln *et al.*, 2017. Role of protein kinase N2 (PKN2) in cigarette smoke-mediated oncogenic transformation of oral cells

| Gene Symbol | Gene ID | Protein Description                                                                    | Protein Accession | # Proteins | # Unique Peptides | # Peptides | # PSMs | OKF6/TERT1-Smoke/<br>OKF6/TERT1-Parental<br>(130/126) R1 | OKF6/TERT1-Smoke/<br>OKF6/TERT1-Parental<br>(128/127) R2 | Ratio Standard Errors [%]:<br>OKF6/TERT1-Smoke/<br>OKF6/TERT1-Parental<br>(130/126) R1 | Ratio Standard Errors [%]:<br>OKF6/TERT1-Smoke/<br>OKF6/TERT1-Parental<br>(128/127) R2 | Ratio Variabilities [%]:<br>F13: OKF6/TERT1-<br>Smoke/<br>OKF6/TERT1-Parental<br>(130/126) R1 | Ratio Variabilities [%]:<br>F13: OKF6/TERT1-<br>Smoke/<br>OKF6/TERT1-Parental<br>(128/127) R2 | Ratio Counts: F13:<br>OKF6/TERT1-Smoke/<br>OKF6/TERT1-Parental<br>(130/126) R1 | Ratio Counts: F13:<br>OKF6/TERT1-Smoke/<br>OKF6/TERT1-Parental<br>(128/127) R2 | HPRD ID | Entrez Gene ID | Gene Name                                                                                          | Molecular Function                              | Primary Localization           | Molecular Class                    | Biological Process                                                                | Domains                      | Plasma Proteome Database |
|-------------|---------|----------------------------------------------------------------------------------------|-------------------|------------|-------------------|------------|--------|----------------------------------------------------------|----------------------------------------------------------|----------------------------------------------------------------------------------------|----------------------------------------------------------------------------------------|-----------------------------------------------------------------------------------------------|-----------------------------------------------------------------------------------------------|--------------------------------------------------------------------------------|--------------------------------------------------------------------------------|---------|----------------|----------------------------------------------------------------------------------------------------|-------------------------------------------------|--------------------------------|------------------------------------|-----------------------------------------------------------------------------------|------------------------------|--------------------------|
| CADM2       | 253559  | cell adhesion molecule 2 isoform 3 precursor                                           | NP_694854.2       | 5          | 1                 | 1          | 2      | 0.68                                                     | 0.66                                                     |                                                                                        |                                                                                        |                                                                                               |                                                                                               | 1                                                                              | 1                                                                              | 11046   | 253559         | immunoglobulin superfamily, member 4D                                                              | Cell adhesion molecule activity                 | -                              | Adhesion molecule                  | Cell communication;Signal transduction                                            | SP_LIKE;IGC2;Band 4.1;TM;EG  | Yes                      |
| ARL4C       | 10123   | ADP-ribosylation factor-like protein 4C isoform 1                                      | NP_001269360.1    | 2          | 1                 | 1          | 2      | 0.68                                                     | 0.64                                                     |                                                                                        |                                                                                        |                                                                                               |                                                                                               | 1                                                                              | 1                                                                              | 11988   | 10123          | ADP-ribosylation factor-like 7                                                                     | GTPase activity                                 | Nucleus                        | GTPase                             | Cell communication;Signal transduction                                            | ARF                          | Yes                      |
| ITGB4       | 3691    | integrin beta-4 isoform 3 precursor                                                    | NP_001005731.1    | 2          | 1                 | 65         | 203    | 0.68                                                     | 0.63                                                     |                                                                                        |                                                                                        |                                                                                               |                                                                                               | 1                                                                              | 1                                                                              | 946     | 3691           | integrin, beta 4                                                                                   | Cell adhesion molecule activity                 | Integral to membrane;Nucleus   | Adhesion molecule                  | Cell communication;Signal transduction;Cell migration;Cell adhesion;Wound healing | PS1;VWA;CALX;B;FN3;TM;EGF;SP | Yes                      |
| MYO5A       | 4644    | unconventional myosin-Va isoform 1                                                     | NP_000250.3       | 2          | 4                 | 4          | 9      | 0.68                                                     | 0.63                                                     | 13.23                                                                                  | 13.43                                                                                  | 18.1                                                                                          | 17.1                                                                                          | 4                                                                              | 4                                                                              | 1179    | 4644           | myosin VA (heavy polypeptide 12, myosin)                                                           | Structural molecule activity                    | Cytoplasm                      | Structural protein                 | Cell growth and/or maintenance                                                    | MYOSIN;JC;CC                 | Yes                      |
| ADAM15      | 8751    | disintegrin and metalloproteinase domain-containing protein 15 isoform 6 preproprotein | NP_997080.1       | 6          | 1                 | 1          | 1      | 0.68                                                     | 0.63                                                     |                                                                                        |                                                                                        |                                                                                               |                                                                                               | 1                                                                              | 1                                                                              | 5674    | 8751           | a disintegrin and metalloproteinase domain 15 (metaguidin)                                         | Metalloproteinase activity                      | Plasma membrane                | Metallo protease                   | Cell adhesion;Protein metabolism                                                  | TM;REP;DISINT;RGD;SP;ACR     | Yes                      |
| PLEC        | 5339    | plectin isoform 1a                                                                     | NP_958786.1       | 16         | 1                 | 345        | 1368   | 0.68                                                     | 0.61                                                     | 28.22                                                                                  | 21.28                                                                                  | 27.7                                                                                          | 18.4                                                                                          | 2                                                                              | 2                                                                              |         |                |                                                                                                    |                                                 |                                |                                    |                                                                                   |                              |                          |
| ITPR3       | 3710    | inositol 1,4,5-trisphosphate receptor type 3                                           | NP_002215.2       | 1          | 23                | 29         | 58     | 0.68                                                     | 0.61                                                     | 10.01                                                                                  | 9.71                                                                                   | 33.7                                                                                          | 29.1                                                                                          | 23                                                                             | 23                                                                             | 926     | 3710           | inositol 1,4,5-trisphosphate receptor, type 3                                                      | Intracellular ligand-gated ion channel activity | Plasma membrane                | Intracellular ligand-gated channel | Cell communication;Signal transduction                                            | MR;RYDR;TM;CC                | Yes                      |
| FLOT2       | 2319    | flotillin-2                                                                            | NP_004466.2       | 1          | 14                | 14         | 41     | 0.68                                                     | 0.61                                                     | 3.89                                                                                   | 14.19                                                                                  | 12.2                                                                                          | 41.4                                                                                          | 21                                                                             | 21                                                                             | 580     | 2319           | flotillin 2                                                                                        | Cell adhesion molecule activity                 | Plasma membrane                | Adhesion molecule                  | Cell communication;Signal transduction                                            | PHB;CC                       | Yes                      |
| RAB10       | 10890   | ras-related protein Rab-10                                                             | NP_057215.3       | 12         | 6                 | 8          | 78     | 0.68                                                     | 0.6                                                      | 6.18                                                                                   | 7.75                                                                                   | 13.4                                                                                          | 14.9                                                                                          | 10                                                                             | 10                                                                             | 6692    | 10890          | RAB10, member RAS oncogene family                                                                  | GTPase activity                                 | Nucleus;Golgi vesicle          | GTPase                             | Cell communication;Signal transduction                                            | RAB                          | Yes                      |
| TBC1D5      | 9779    | TBC1 domain family member 5 isoform a                                                  | NP_001127853.1    | 2          | 4                 | 4          | 8      | 0.68                                                     | 0.6                                                      | 8.24                                                                                   | 56.41                                                                                  | 12.6                                                                                          | 87                                                                                            | 5                                                                              | 5                                                                              | 10262   | 9779           | TBC1 domain family, member 5                                                                       | Molecular function unknown                      | -                              | Unclassified                       | Biological process unknown                                                        | TBC                          | Yes                      |
| ARF6        | 382     | ADP-ribosylation factor 6                                                              | NP_001654.1       | 4          | 5                 | 5          | 27     | 0.67                                                     | 1.36                                                     | 9.16                                                                                   | 11.08                                                                                  | 21.5                                                                                          | 55.9                                                                                          | 12                                                                             | 12                                                                             | 2714    | 382            | ADP-ribosylation factor 6                                                                          | Transporter activity                            | Cytosol                        | Transport/cargo protein            | Transport                                                                         | ARF                          | Yes                      |
| KRT81       | 3887    | keratin, type II cuticular Hb1                                                         | NP_002272.2       | 4          | 2                 | 3          | 7      | 0.67                                                     | 1.26                                                     |                                                                                        |                                                                                        |                                                                                               |                                                                                               | 1                                                                              | 1                                                                              | 3691    | 3887           | keratin, hair, basic, 1                                                                            | Structural molecule activity                    | Cytoplasm                      | Structural protein                 | Cell growth and/or maintenance                                                    | CC                           | Yes                      |
| FBXW9       | 84261   | F-box/WD repeat-containing protein 9                                                   | NP_115677.2       | 1          | 1                 | 1          | 1      | 0.67                                                     | 1.19                                                     |                                                                                        |                                                                                        |                                                                                               |                                                                                               | 1                                                                              | 1                                                                              | 12361   | 84261          | F-box and WD-40 domain protein 9                                                                   | Molecular function unknown                      | -                              | Unclassified                       | Biological process unknown                                                        | F_BOX;WD40                   | No                       |
| NXT1        | 29107   | NTF2-related export protein 1                                                          | NP_037380.1       | 1          | 1                 | 1          | 3      | 0.67                                                     | 1.09                                                     |                                                                                        |                                                                                        |                                                                                               |                                                                                               | 1                                                                              | 1                                                                              | 16159   | 29107          | NTF2-like export factor 1                                                                          | Transporter activity                            | Nucleus                        | Transport/cargo protein            | Transport                                                                         | -                            | No                       |
| CHMP1A      | 5119    | charged multivesicular body protein 1a isoform 2                                       | NP_002759.2       | 1          | 1                 | 1          | 2      | 0.67                                                     | 1.06                                                     |                                                                                        |                                                                                        |                                                                                               |                                                                                               | 1                                                                              | 1                                                                              | 1237    | 5119           | procollagen (type III) N-endopeptidase                                                             | Metalloproteinase activity                      | -                              | Metallo protease                   | Protein metabolism                                                                | CC                           | No                       |
| TMED2       | 10959   | transmembrane emp24 domain-containing protein 2 precursor                              | NP_006806.1       | 1          | 6                 | 6          | 16     | 0.67                                                     | 1.05                                                     | 30.03                                                                                  | 11.47                                                                                  | 57.5                                                                                          | 32.7                                                                                          | 7                                                                              | 7                                                                              | 17984   | 10959          | None                                                                                               | Transporter activity                            | Golgi apparatus                | Transport/cargo protein            | Transport                                                                         | SP;CC;TM                     | Yes                      |
| MON2        | 23041   | protein MON2 homolog isoform 1                                                         | NP_055841.2       | 5          | 2                 | 2          | 3      | 0.67                                                     | 1.05                                                     |                                                                                        |                                                                                        |                                                                                               |                                                                                               | 1                                                                              | 1                                                                              | 11123   | 23041          | None                                                                                               | Molecular function unknown                      | -                              | Unclassified                       | Biological process unknown                                                        | -                            | Yes                      |
| ATP6V1G1    | 9550    | V-type proton ATPase subunit G 1                                                       | NP_004879.1       | 1          | 4                 | 4          | 5      | 0.67                                                     | 0.99                                                     | 8.37                                                                                   | 6.05                                                                                   | 9.7                                                                                           | 10.4                                                                                          | 3                                                                              | 3                                                                              | 6294    | 9550           | ATPase, H+-transporting, lysosomal 13kDa, V1 subunit G isoform 1                                   | Transporter activity                            | Lysosome                       | Transport/cargo protein            | Metabolism;Energy pathways                                                        | CC                           | Yes                      |
| NDUFA11     | 126328  | NADH dehydrogenase [ubiquinone] 1 alpha subcomplex subunit 11 isoform 2                | NP_001180304.1    | 2          | 2                 | 2          | 8      | 0.67                                                     | 0.98                                                     | 7.83                                                                                   | 2.35                                                                                   | 10.5                                                                                          | 4.6                                                                                           | 4                                                                              | 4                                                                              | 14818   | 126328         | NADH dehydrogenase (ubiquinone) 1 alpha subcomplex, 11, 14.7kDa                                    | Oxidoreductase activity                         | Mitochondrion                  | Enzyme: Oxidoreductase             | Metabolism;Energy pathways                                                        | TM                           | Yes                      |
| RBKS        | 64080   | ribokinase isoform 1                                                                   | NP_071411.1       | 1          | 1                 | 1          | 2      | 0.67                                                     | 0.98                                                     |                                                                                        |                                                                                        |                                                                                               |                                                                                               | 1                                                                              | 1                                                                              | 15222   | 64080          | ribokinase                                                                                         | Catalytic activity                              | -                              | Enzyme: Phosphotransferase         | Metabolism;Energy pathways                                                        | -                            | Yes                      |
| SLC25A4     | 291     | ADP/ATP translocase 1                                                                  | NP_001142.2       | 2          | 1                 | 10         | 29     | 0.67                                                     | 0.87                                                     |                                                                                        |                                                                                        |                                                                                               |                                                                                               | 1                                                                              | 1                                                                              | 58      | 291            | solute carrier family 25 (mitochondrial carrier; ser; adenosine nucleotide translocator), member 4 | Transporter activity                            | Mitochondrion                  | Transport/cargo protein            | Transport                                                                         | TM                           | Yes                      |
| NDUFB1      | 4707    | NADH dehydrogenase [ubiquinone] 1 beta subcomplex subunit 1                            | NP_004536.2       | 1          | 1                 | 1          | 2      | 0.67                                                     | 0.87                                                     |                                                                                        |                                                                                        |                                                                                               |                                                                                               | 1                                                                              | 1                                                                              | 11952   | 4707           | NADH dehydrogenase (ubiquinone) 1 beta subcomplex, 1, 7kDa                                         | Oxidoreductase activity                         | Integral to membrane           | Enzyme: Oxidoreductase             | Metabolism;Energy pathways                                                        | TM                           | No                       |
| BCAP31      | 10134   | B-cell receptor-associated protein 31 isoform a                                        | NP_001132929.1    | 2          | 8                 | 8          | 18     | 0.67                                                     | 0.84                                                     | 10.55                                                                                  | 3.19                                                                                   | 22.7                                                                                          | 8.5                                                                                           | 10                                                                             | 10                                                                             | 2319    | 10134          | B-cell receptor-associated protein 31                                                              | Transporter activity                            | Endoplasmic reticulum          | Transport/cargo protein            | Transport                                                                         | SP;TM;CC                     | Yes                      |
| TCHH        | 7062    | trichohyalin                                                                           | NP_009044.2       | 1          | 1                 | 1          | 1      | 0.67                                                     | 0.8                                                      |                                                                                        |                                                                                        |                                                                                               |                                                                                               | 1                                                                              | 1                                                                              | 19269   | 7062           | trichohyalin                                                                                       | Calcium ion binding                             | -                              | Calcium binding protein            | Calcium-mediated signaling                                                        | S_100;EF;CC                  | Yes                      |
| SYNPO       | 11346   | syntrophin isoform A                                                                   | NP_009217.3       | 2          | 1                 | 6          | 11     | 0.67                                                     | 0.8                                                      |                                                                                        |                                                                                        |                                                                                               |                                                                                               | 1                                                                              | 1                                                                              | 12179   | 11346          | syntrophin                                                                                         | Cytoskeletal protein binding                    | Cytoskeleton;Nucleus;Cytoplasm | Cytoskeletal associated protein    | Cell growth and/or maintenance                                                    | -                            | Yes                      |
| ERMP1       | 79956   | endoplasmic reticulum metalloproteinase 1                                              | NP_079172.2       | 1          | 8                 | 8          | 20     | 0.67                                                     | 0.78                                                     | 8.88                                                                                   | 10.34                                                                                  | 20                                                                                            | 27.4                                                                                          | 11                                                                             | 11                                                                             | 17227   | 79956          | KIAA1815                                                                                           | Molecular function unknown                      | Integral to membrane           | Integral membrane protein          | Biological process unknown                                                        | TM                           | No                       |
| ENO3        | 2027    | beta-enolase isoform 1                                                                 | NP_001967.3       | 2          | 1                 | 4          | 65     | 0.67                                                     | 0.76                                                     |                                                                                        |                                                                                        |                                                                                               |                                                                                               | 1                                                                              | 1                                                                              | 11746   | 2027           | enolase 3 (beta, muscle)                                                                           | Catalytic activity                              | Extracellular                  | Enzyme: Hydratase                  | Metabolism;Energy pathways                                                        | -                            | Yes                      |
| RAC1        | 5879    | ras-related C3 botulinum toxin substrate 1 isoform Rac1b                               | NP_061485.1       | 5          | 5                 | 8          | 25     | 0.67                                                     | 0.76                                                     | 19.77                                                                                  | 9.1                                                                                    | 45.9                                                                                          | 23.2                                                                                          | 11                                                                             | 11                                                                             | 3627    | 5879           | ras-related C3 botulinum toxin substrate 1 (rho family, small GTP binding protein Rac1)            | GTPase activity                                 | Cytoplasm                      | GTPase                             | Cell communication;Signal transduction                                            | RHO                          | Yes                      |

Supplementary Table S1. List of quantified proteins in OKF6/TERT1-Smoke cells  
 Raigonalan *et al.*, 2017. Role of protein kinase N2 (PKN2) in cigarette smoke-mediated oncogenic transformation of oral cells

| Gene Symbol  | Gene ID   | Protein Description                                                                            | Protein Accession | # Proteins | # Unique Peptides | # Peptides | # PSMs | OKF6/TERT1-Smoke/<br>OKF6/TERT1-Parental<br>(130/126) R1 | OKF6/TERT1-Smoke/<br>OKF6/TERT1-Parental<br>(128/127) R2 | Ratio Standard Errors [%]:<br>OKF6/TERT1-Smoke/<br>OKF6/TERT1-Parental<br>(130/126) R1 | Ratio Standard Errors [%]:<br>OKF6/TERT1-Smoke/<br>OKF6/TERT1-Parental<br>(128/127) R2 | Ratio Variabilities [%]:<br>F13: OKF6/TERT1-<br>Smoke/<br>OKF6/TERT1-Parental<br>(130/126) R1 | Ratio Variabilities [%]:<br>F13: OKF6/TERT1-<br>Smoke/<br>OKF6/TERT1-Parental<br>(128/127) R2 | Ratio Counts: F13:<br>OKF6/TERT1-Smoke/<br>OKF6/TERT1-Parental<br>(130/126) R1 | Ratio Counts: F13:<br>OKF6/TERT1-Smoke/<br>OKF6/TERT1-Parental<br>(128/127) R2 | HPRD ID | Entrez Gene ID | Gene Name                                                                                                                                       | Molecular Function                           | Primary Localization | Molecular Class                    | Biological Process                                                           | Domains       | Plasma Proteome Database |
|--------------|-----------|------------------------------------------------------------------------------------------------|-------------------|------------|-------------------|------------|--------|----------------------------------------------------------|----------------------------------------------------------|----------------------------------------------------------------------------------------|----------------------------------------------------------------------------------------|-----------------------------------------------------------------------------------------------|-----------------------------------------------------------------------------------------------|--------------------------------------------------------------------------------|--------------------------------------------------------------------------------|---------|----------------|-------------------------------------------------------------------------------------------------------------------------------------------------|----------------------------------------------|----------------------|------------------------------------|------------------------------------------------------------------------------|---------------|--------------------------|
| ATP2B4       | 493       | plasma membrane calcium-transporting ATPase 4 isoform 4b                                       | NP_001675.3       | 3          | 13                | 19         | 48     | 0.67                                                     | 0.73                                                     | 14.11                                                                                  | 7.99                                                                                   | 36.7                                                                                          | 22.2                                                                                          | 14                                                                             | 14                                                                             | 159     | 493            | ATPase, Ca++ transporting, plasma membrane 4                                                                                                    | ATPase activity                              | Plasma membrane      | ATPase                             | Transport                                                                    | TM            | Yes                      |
| JUP          | 3728      | junction plakoglobin                                                                           | NP_068831.1       | 1          | 30                | 34         | 129    | 0.67                                                     | 0.7                                                      | 6.84                                                                                   | 9.35                                                                                   | 35.2                                                                                          | 52.5                                                                                          | 56                                                                             | 56                                                                             | 1414    | 3728           | junction plakoglobin                                                                                                                            | Cell adhesion molecule activity              | Cytoplasm            | Adhesion molecule                  | Cell communication;Signal transduction                                       | ARM           | Yes                      |
| DFNA5        | 1687      | non-syndromic hearing impairment protein 5 isoform a                                           | NP_001120925.1    | 2          | 10                | 10         | 24     | 0.67                                                     | 0.69                                                     | 8.71                                                                                   | 11.7                                                                                   | 21.2                                                                                          | 29.7                                                                                          | 13                                                                             | 13                                                                             | 2996    | 1687           | deafness, autosomal dominant 5                                                                                                                  | Molecular function unknown                   | -                    | Unclassified                       | Biological process unknown                                                   | -             | Yes                      |
| GUSB         | 2990      | beta-glucuronidase isoform 1 precursor                                                         | NP_000172.2       | 5          | 3                 | 3          | 6      | 0.67                                                     | 0.68                                                     | 6.79                                                                                   | 12.65                                                                                  | 10.2                                                                                          | 19.5                                                                                          | 5                                                                              | 5                                                                              | 2018    | 2990           | glucuronidase, beta                                                                                                                             | Hydrolase activity                           | Lysosome             | Enzyme: Hydrolase                  | Metabolism;Energy pathways                                                   | SP            | Yes                      |
| NDUFB5       | 4711      | NADH dehydrogenase [ubiquinone] 1 beta subcomplex subunit 5, mitochondrial isoform 1 precursor | NP_002483.1       | 2          | 2                 | 2          | 4      | 0.67                                                     | 0.64                                                     | 36.77                                                                                  | 11.9                                                                                   | 44.5                                                                                          | 13.3                                                                                          | 3                                                                              | 3                                                                              | 11956   | 4711           | NADH dehydrogenase (ubiquinone) 1 beta subcomplex, 5, 16kDa                                                                                     | Oxidoreductase activity                      | Mitochondrion        | Enzyme: Oxidoreductase             | Metabolism;Energy pathways                                                   | TM;CC         | Yes                      |
| ITGA6        | 3655      | integrin alpha-6 isoform b precursor                                                           | NP_000201.2       | 2          | 38                | 38         | 123    | 0.67                                                     | 0.63                                                     | 5.63                                                                                   | 9.65                                                                                   | 31.3                                                                                          | 52.9                                                                                          | 66                                                                             | 66                                                                             | 945     | 3655           | integrin, alpha 6                                                                                                                               | Receptor activity                            | Plasma membrane      | Cell surface receptor              | Cell communication;Signal transduction                                       | TM;INTA;SP    | Yes                      |
| SCAF4        | 57466     | splicing factor, arginine/serine-rich 15 isoform 1                                             | NP_065757.1       | 3          | 2                 | 2          | 4      | 0.67                                                     | 0.55                                                     | 54.05                                                                                  | 73.24                                                                                  | 54.8                                                                                          | 61.6                                                                                          | 2                                                                              | 2                                                                              |         |                |                                                                                                                                                 |                                              |                      |                                    |                                                                              |               |                          |
| DNAJB2       | 3300      | dnaJ homolog subfamily B member 2 isoform b                                                    | NP_006727.2       | 4          | 2                 | 3          | 6      | 0.67                                                     | 0.51                                                     | 22.43                                                                                  | 20.07                                                                                  | 21.4                                                                                          | 14.6                                                                                          | 2                                                                              | 2                                                                              | 7249    | 3300           | DnaJ (Hsp40) homolog, subfamily B, member 2                                                                                                     | Heat shock protein activity                  | Cytoplasm            | Heat shock protein                 | Protein metabolism                                                           | DNAJ;UIM      | Yes                      |
| MGST1        | 4257      | microsomal glutathione S-transferase 1 isoform a                                               | NP_665735.1       | 3          | 1                 | 1          | 4      | 0.66                                                     | 1.31                                                     | 46.41                                                                                  | 23.65                                                                                  | 45.8                                                                                          | 45.8                                                                                          | 2                                                                              | 2                                                                              | 705     | 4257           | microsomal glutathione S-transferase 1                                                                                                          | Glutathione transferase activity             | Microsome            | Enzyme: Glutathione transferase    | Metabolism;Energy pathways;Xenobiotic metabolism                             | SP            | Yes                      |
| PTTG1IP      | 754       | pituitary tumor-transforming gene 1 protein-interacting protein isoform 1 precursor            | NP_004330.1       | 1          | 1                 | 1          | 8      | 0.66                                                     | 1.26                                                     | 18.1                                                                                   | 4.79                                                                                   | 24.4                                                                                          | 12.1                                                                                          | 4                                                                              | 4                                                                              | 4807    | 754            | pituitary tumor-transforming 1 interacting protein                                                                                              | Transporter activity                         | Nucleus              | Transport/cargo protein            | Transport                                                                    | NLS;TM;CC;PSI | No                       |
| C14orf169    | 79697     | bifunctional lysine-specific demethylase and histidyl-hydroxylase NO66                         | NP_078920.2       | 1          | 2                 | 2          | 3      | 0.66                                                     | 1.26                                                     |                                                                                        |                                                                                        |                                                                                               |                                                                                               | 1                                                                              | 1                                                                              | 12641   | 79697          | chromosome 14 open reading frame 169                                                                                                            | Transcription regulator activity             | Nucleolus            | Transcription regulatory protein   | Regulation of nucleobase, nucleoside, nucleotide and nucleic acid metabolism | JMIC          | No                       |
| ATP5J2-PTCD1 | 100526740 | ATP5J2-PTCD1 fusion protein                                                                    | NP_001185808.1    | 6          | 4                 | 4          | 19     | 0.66                                                     | 1.19                                                     | 10.97                                                                                  | 13.02                                                                                  | 21.8                                                                                          | 49.2                                                                                          | 9                                                                              | 9                                                                              |         |                |                                                                                                                                                 |                                              |                      |                                    |                                                                              |               |                          |
| ESRRA        | 2101      | steroid hormone receptor ERR1 isoform 1                                                        | NP_004442.3       | 3          | 2                 | 2          | 2      | 0.66                                                     | 1.04                                                     |                                                                                        |                                                                                        |                                                                                               |                                                                                               | 1                                                                              | 1                                                                              | 7210    | 2101           | estrogen-related receptor alpha                                                                                                                 | Transcription regulator activity             | Nucleus              | Transcription regulatory protein   | Regulation of nucleobase, nucleoside, nucleotide and nucleic acid metabolism | ZnF,C4;HOLI   | Yes                      |
| DES          | 1674      | desmin                                                                                         | NP_001918.3       | 5          | 2                 | 8          | 38     | 0.66                                                     | 1.03                                                     | 3.09                                                                                   | 10.44                                                                                  | 4.6                                                                                           | 24.4                                                                                          | 5                                                                              | 5                                                                              | 514     | 1674           | desmin                                                                                                                                          | Structural constituent of cytoskeleton       | Cytoplasm            | Cytoskeletal protein               | Cell growth and/or maintenance                                               | CC            | Yes                      |
| CAV2         | 858       | caveolin-2 isoform a                                                                           | NP_001224.1       | 3          | 1                 | 1          | 3      | 0.66                                                     | 1.03                                                     | 70.88                                                                                  | 14.05                                                                                  | 74.8                                                                                          | 20.8                                                                                          | 2                                                                              | 2                                                                              | 3029    | 858            | caveolin 2                                                                                                                                      | Protein binding                              | Plasma membrane      | Integral membrane protein          | Cell communication;Signal transduction                                       | TM            | Yes                      |
| AKR1C2       | 1646      | aldo-keto reductase family 1 member C2 isoform 1                                               | NP_995317.1       | 2          | 3                 | 14         | 53     | 0.66                                                     | 0.98                                                     | 24.14                                                                                  | 31.7                                                                                   | 32.8                                                                                          | 68.3                                                                                          | 4                                                                              | 4                                                                              | 11857   | 1646           | aldo-keto reductase family 1, member C2(dihydrodiol dehydrogenase 2, bile acid binding protein; 3-alpha hydroxysteroid dehydrogenase, type III) | Oxidoreductase activity;Transporter activity | Cytosol              | Enzyme: Dehydrogenase              | Metabolism;Transport                                                         | -             | No                       |
| RAB32        | 10981     | ras-related protein Rab-32                                                                     | NP_006825.1       | 1          | 5                 | 7          | 20     | 0.66                                                     | 0.91                                                     | 28.48                                                                                  | 5.86                                                                                   | 43.6                                                                                          | 12                                                                                            | 5                                                                              | 5                                                                              | 6700    | 10981          | RAB32, member RAS oncogene family                                                                                                               | GTPase activity                              | Mitochondrion        | GTPase                             | Cell communication;Signal transduction                                       | RAB           | Yes                      |
| RHOC         | 389       | rho-related GTP-binding protein RhoC precursor                                                 | NP_786886.1       | 2          | 4                 | 11         | 47     | 0.66                                                     | 0.83                                                     | 3.73                                                                                   | 4.4                                                                                    | 4.9                                                                                           | 7.3                                                                                           | 4                                                                              | 4                                                                              | 1322    | 389            | ras homolog gene family, member C                                                                                                               | GTPase activity                              | Cytoplasm            | GTPase                             | Cell communication;Signal transduction                                       | RHO           | Yes                      |
| SLC25A1      | 6576      | tricarboxylate transport protein, mitochondrial isoform b                                      | NP_001243463.1    | 3          | 9                 | 9          | 37     | 0.66                                                     | 0.77                                                     | 15.1                                                                                   | 7.85                                                                                   | 45.8                                                                                          | 26.9                                                                                          | 19                                                                             | 19                                                                             | 1832    | 6576           | solute carrier family 25 (mitochondrial carrier, citrate transporter), member 1                                                                 | Transporter activity                         | Mitochondrion        | Transport/cargo protein            | Transport                                                                    | TM            | Yes                      |
| ANXA3        | 306       | annexin A3                                                                                     | NP_005130.1       | 1          | 18                | 18         | 67     | 0.66                                                     | 0.72                                                     | 5.92                                                                                   | 5.87                                                                                   | 23.4                                                                                          | 25.5                                                                                          | 35                                                                             | 35                                                                             | 111     | 306            | annexin A3                                                                                                                                      | Calcium ion binding                          | Cytoplasm            | Calcium binding protein            | Cell communication;Signal transduction                                       | ANX           | Yes                      |
| HSPA12A      | 259217    | heat shock 70kDa protein 12A                                                                   | NP_079291.2       | 1          | 1                 | 1          | 2      | 0.66                                                     | 0.63                                                     |                                                                                        |                                                                                        |                                                                                               |                                                                                               | 1                                                                              | 1                                                                              | 19074   | 259217         | heat shock 70kDa protein 12A                                                                                                                    | Heat shock protein activity                  | -                    | Heat shock protein                 | Protein folding                                                              | -             | Yes                      |
| TOR4A        | 54863     | torin-4A                                                                                       | NP_060193.2       | 1          | 2                 | 2          | 3      | 0.66                                                     | 0.56                                                     |                                                                                        |                                                                                        |                                                                                               |                                                                                               | 1                                                                              | 1                                                                              |         |                |                                                                                                                                                 |                                              |                      |                                    |                                                                              |               |                          |
| TAMM41       | 132001    | phosphatidate cytidyltransferase, mitochondrial isoform a                                      | NP_001271330.1    | 2          | 2                 | 2          | 4      | 0.65                                                     | 1.83                                                     | 80.07                                                                                  | 46.25                                                                                  | 111.6                                                                                         | 277                                                                                           | 3                                                                              | 3                                                                              |         |                |                                                                                                                                                 |                                              |                      |                                    |                                                                              |               |                          |
| ENOSF1       | 55556     | mitochondrial enolase superfamily member 1 isoform rTSbeta                                     | NP_059982.2       | 2          | 1                 | 1          | 1      | 0.65                                                     | 1.81                                                     |                                                                                        |                                                                                        |                                                                                               |                                                                                               | 1                                                                              | 1                                                                              | 9590    | 55556          | enolase superfamily member 1                                                                                                                    | Ligase activity                              | -                    | Enzyme: Ligase                     | Metabolism;Energy pathways                                                   | -             | No                       |
| PDXP         | 57026     | pyridoxal phosphate phosphatase                                                                | NP_064711.1       | 1          | 1                 | 1          | 1      | 0.65                                                     | 1.21                                                     |                                                                                        |                                                                                        |                                                                                               |                                                                                               | 1                                                                              | 1                                                                              | 16468   | 57026          | pyridoxal (pyridoxine, vitamin B6) phosphatase                                                                                                  | Acid phosphatase activity                    | -                    | Enzyme: Phosphatase                | Metabolism;Energy pathways                                                   | -             | Yes                      |
| PSD3         | 23362     | PH and SEC7 domain-containing protein 3 isoform a                                              | NP_056125.3       | 2          | 1                 | 1          | 2      | 0.65                                                     | 1.07                                                     |                                                                                        |                                                                                        |                                                                                               |                                                                                               | 1                                                                              | 1                                                                              | 11462   | 23362          | pleckstrin and Sec7 domain containing 3                                                                                                         | Guanyl-nucleotide exchange factor activity   | -                    | Guanine nucleotide exchange factor | Cell communication;Signal transduction                                       | Sec7;PH;CC    | Yes                      |

Supplementary Table S1. List of quantified proteins in OKF6/TERT1-Smoke cells  
 Raingonalan *et al.*, 2017. Role of protein kinase N2 (PKN2) in cigarette smoke-mediated oncogenic transformation of oral cells

| Gene Symbol | Gene ID | Protein Description                                                         | Protein Accession | # Proteins | # Unique Peptides | # Peptides | # PSMs | OKF6/TERT1-Smoke/<br>OKF6/TERT1-Parental<br>(130/126) R1 | OKF6/TERT1-Smoke/<br>OKF6/TERT1-Parental<br>(128/127) R2 | Ratio Standard Errors [%]:<br>OKF6/TERT1-Smoke/<br>OKF6/TERT1-Parental<br>(130/126) R1 | Ratio Standard Errors [%]:<br>OKF6/TERT1-Smoke/<br>OKF6/TERT1-Parental<br>(128/127) R2 | Ratio Variabilities [%]:<br>F13: OKF6/TERT1-<br>Smoke/<br>OKF6/TERT1-Parental<br>(130/126) R1 | Ratio Variabilities [%]:<br>F13: OKF6/TERT1-<br>Smoke/<br>OKF6/TERT1-Parental<br>(128/127) R2 | Ratio Counts: F13:<br>OKF6/TERT1-Smoke/<br>OKF6/TERT1-Parental<br>(130/126) R1 | Ratio Counts: F13:<br>OKF6/TERT1-Smoke/<br>OKF6/TERT1-Parental<br>(128/127) R2 | HPRD ID | Entrez Gene ID | Gene Name                                                                                        | Molecular Function                                      | Primary Localization  | Molecular Class                     | Biological Process                                                           | Domains                     | Plasma Proteome Database |
|-------------|---------|-----------------------------------------------------------------------------|-------------------|------------|-------------------|------------|--------|----------------------------------------------------------|----------------------------------------------------------|----------------------------------------------------------------------------------------|----------------------------------------------------------------------------------------|-----------------------------------------------------------------------------------------------|-----------------------------------------------------------------------------------------------|--------------------------------------------------------------------------------|--------------------------------------------------------------------------------|---------|----------------|--------------------------------------------------------------------------------------------------|---------------------------------------------------------|-----------------------|-------------------------------------|------------------------------------------------------------------------------|-----------------------------|--------------------------|
| HIST1H1C    | 3006    | histone H1.2                                                                | NP_005310.1       | 3          | 2                 | 11         | 72     | 0.65                                                     | 1.07                                                     | 28.97                                                                                  | 4.19                                                                                   | 38.9                                                                                          | 8.9                                                                                           | 4                                                                              | 4                                                                              | 7514    | 3006           | histone 1, H1c                                                                                   | DNA binding                                             | Nucleus               | DNA binding protein                 | Regulation of nucleobase, nucleoside, nucleotide and nucleic acid metabolism | H15                         | Yes                      |
| RAB27B      | 5874    | ras-related protein Rab-27B                                                 | NP_004154.2       | 1          | 2                 | 2          | 3      | 0.65                                                     | 1.02                                                     |                                                                                        |                                                                                        |                                                                                               |                                                                                               | 1                                                                              | 1                                                                              | 4846    | 5874           | RAB27B, member RAS oncogene family                                                               | GTPase activity                                         | Plasma membrane       | GTPase                              | Cell communication;Signal transduction                                       | RAB                         | Yes                      |
| NDUFB10     | 4716    | NADH dehydrogenase [ubiquinone] 1 beta subcomplex subunit 10                | NP_004539.1       | 1          | 6                 | 6          | 12     | 0.65                                                     | 0.97                                                     | 12.4                                                                                   | 3.89                                                                                   | 22.9                                                                                          | 10.7                                                                                          | 8                                                                              | 8                                                                              | 11958   | 4716           | NADH dehydrogenase (ubiquinone) 1 beta subcomplex, 10, 22kDa                                     | Oxidoreductase activity                                 | Mitochondrion         | Enzyme; Oxidoreductase              | Metabolism;Energy pathways                                                   | -                           | No                       |
| CSNK1A1     | 1452    | casein kinase 1 isoform alpha isoform 2                                     | NP_001883.4       | 5          | 8                 | 9          | 15     | 0.65                                                     | 0.95                                                     | 21.45                                                                                  | 11.45                                                                                  | 41                                                                                            | 31.4                                                                                          | 8                                                                              | 8                                                                              | 2739    | 1452           | casein kinase 1, alpha 1                                                                         | Protein serine/threonine kinase activity                | Cytoplasm             | Serine/threonine kinase             | Cell cycle                                                                   | S_T_Kinase;NLS;S_T_Y_Kinase | Yes                      |
| DHCR24      | 1718    | delta(24)-sterol reductase precursor                                        | NP_055577.1       | 1          | 5                 | 5          | 8      | 0.65                                                     | 0.94                                                     | 16.06                                                                                  | 9.39                                                                                   | 23.6                                                                                          | 19.9                                                                                          | 5                                                                              | 5                                                                              | 5916    | 1718           | 24-dehydrocholesterol reductase                                                                  | Catalytic activity                                      | Plasma membrane       | Enzyme; Reductase                   | Metabolism;Energy pathways                                                   | TM;SP                       | No                       |
| HISTH2AE    | 3012    | histone H2A type 1-B-E                                                      | NP_066390.1       | 3          | 1                 | 7          | 165    | 0.65                                                     | 0.87                                                     | 34.82                                                                                  | 30.91                                                                                  | 33                                                                                            | 39.7                                                                                          | 2                                                                              | 2                                                                              | 4152    | 3012           | histone 1, H2ae                                                                                  | DNA binding                                             | Nucleus               | DNA binding protein                 | Regulation of nucleobase, nucleoside, nucleotide and nucleic acid metabolism | H2A                         | No                       |
| IGF1R       | 3480    | insulin-like growth factor 1 receptor isoform 1 precursor                   | NP_000866.1       | 2          | 1                 | 1          | 2      | 0.65                                                     | 0.83                                                     |                                                                                        |                                                                                        |                                                                                               |                                                                                               | 1                                                                              | 1                                                                              | 932     | 3480           | insulin-like growth factor 1 receptor                                                            | Transmembrane receptor protein tyrosine kinase activity | Plasma membrane       | Receptor tyrosine kinase            | Cell communication;Signal transduction                                       | TM;REC_FU;FN3;Tyr_Kinase;SP | Yes                      |
| NDUFB3      | 4709    | NADH dehydrogenase [ubiquinone] 1 beta subcomplex subunit 3                 | NP_001244031.1    | 1          | 1                 | 1          | 2      | 0.65                                                     | 0.81                                                     |                                                                                        |                                                                                        |                                                                                               |                                                                                               | 1                                                                              | 1                                                                              | 11954   | 4709           | NADH dehydrogenase (ubiquinone) 1 beta subcomplex, 3, 12kDa                                      | Oxidoreductase activity                                 | -                     | Enzyme; Oxidoreductase              | Metabolism;Energy pathways                                                   | TM                          | No                       |
| MINPP1      | 9562    | multiple inositol polyphosphate phosphatase 1 isoform 1 precursor           | NP_004888.2       | 3          | 3                 | 3          | 4      | 0.65                                                     | 0.8                                                      | 15.47                                                                                  | 9.57                                                                                   | 17.6                                                                                          | 13.4                                                                                          | 3                                                                              | 3                                                                              | 5652    | 9562           | multiple inositol polyphosphate histidinylphosphatase, 1                                         | Lipid phosphatase activity                              | Endoplasmic reticulum | Lipid phosphatase                   | Cell communication;Signal transduction                                       | SP                          | Yes                      |
| SNX8        | 29886   | sorting nexin-8                                                             | NP_037453.1       | 1          | 1                 | 1          | 5      | 0.65                                                     | 0.79                                                     | 4.46                                                                                   | 4.54                                                                                   | 4.1                                                                                           | 5.1                                                                                           | 2                                                                              | 2                                                                              | 11592   | 29886          | sorting nexin 8                                                                                  | Transporter activity                                    | -                     | Transport/cargo protein             | Transport                                                                    | PX                          | Yes                      |
| CDC42BPG    | 55561   | serine/threonine-protein kinase MRCK gamma                                  | NP_059955.2       | 1          | 2                 | 2          | 4      | 0.65                                                     | 0.77                                                     | 4.82                                                                                   | 2.94                                                                                   | 4.4                                                                                           | 3.2                                                                                           | 2                                                                              | 2                                                                              | 13013   | 55561          | CDC42 binding protein kinase gamma(DMPK-like)                                                    | Protein serine/threonine kinase activity                | Cytoplasm             | Serine/threonine kinase             | Cell communication;Signal transduction                                       | S_T_Kinase;CC;C1;PHCNH;PBD  | Yes                      |
| FXRD3       | 5349    | FXRD domain-containing ion transport regulator 3 isoform 3                  | NP_001129479.1    | 3          | 1                 | 1          | 2      | 0.65                                                     | 0.75                                                     | 14.75                                                                                  | 22.24                                                                                  | 13.7                                                                                          | 23.8                                                                                          | 2                                                                              | 2                                                                              | 5410    | 5349           | FXRD domain containing ion transport regulator3                                                  | Ion channel activity                                    | Plasma membrane       | Ion channel                         | Transport                                                                    | SP;TM                       | Yes                      |
| CISD2       | 493856  | CDGSH iron-sulfur domain-containing protein 2                               | NP_001008389.1    | 1          | 1                 | 1          | 4      | 0.65                                                     | 0.75                                                     | 0.09                                                                                   | 9.24                                                                                   | 0.1                                                                                           | 9.8                                                                                           | 2                                                                              | 2                                                                              | 17413   | 493856         | None                                                                                             | Molecular function unknown                              | Integral to membrane  | Unclassified                        | Biological process unknown                                                   | TM                          | No                       |
| GNG12       | 55970   | guanine nucleotide-binding protein G(i)(G)s/G(o) subunit gamma-12 precursor | NP_061329.3       | 1          | 4                 | 4          | 15     | 0.65                                                     | 0.71                                                     | 17.1                                                                                   | 14.26                                                                                  | 32                                                                                            | 29.1                                                                                          | 8                                                                              | 8                                                                              | 13592   | 55970          | guanine nucleotide binding protein (G protein), gamma 12                                         | GTPase activity                                         | Cytoplasm             | G protein                           | Cell communication;Signal transduction                                       | CC                          | Yes                      |
| HPX         | 3263    | hemopexin precursor                                                         | NP_000604.1       | 1          | 5                 | 5          | 10     | 0.65                                                     | 0.67                                                     | 9.23                                                                                   | 8.68                                                                                   | 14.8                                                                                          | 14.4                                                                                          | 6                                                                              | 6                                                                              | 793     | 3263           | hemopexin                                                                                        | Transporter activity                                    | Extracellular         | Transport/cargo protein             | Transport                                                                    | SP;HX                       | Yes                      |
| NDUFAB1     | 4706    | acyl carrier protein, mitochondrial precursor                               | NP_004994.1       | 1          | 2                 | 2          | 4      | 0.65                                                     | 0.58                                                     | 22.54                                                                                  | 9.77                                                                                   | 20.8                                                                                          | 8                                                                                             | 2                                                                              | 2                                                                              | 11951   | 4706           | NADH dehydrogenase (ubiquinone) 1, alpha/beta subcomplex, 1, 8kDa                                | Oxidoreductase activity                                 | Mitochondrion         | Enzyme; Oxidoreductase              | Metabolism;Energy pathways                                                   | -                           | No                       |
| GET4        | 51608   | Golgi to ER traffic protein 4 homolog                                       | NP_057033.2       | 1          | 4                 | 4          | 12     | 0.64                                                     | 1.51                                                     | 5.85                                                                                   | 2.75                                                                                   | 8.4                                                                                           | 9.3                                                                                           | 5                                                                              | 5                                                                              |         |                |                                                                                                  |                                                         |                       |                                     |                                                                              |                             |                          |
| SMARCA1     | 6594    | probable global transcription activator SNF2L1 isoform d                    | NP_001269803.1    | 3          | 1                 | 8          | 11     | 0.64                                                     | 1.06                                                     |                                                                                        |                                                                                        |                                                                                               |                                                                                               | 1                                                                              | 1                                                                              | 2055    | 6594           | SWI5NF related, matrix associated, actin dependent regulator of chromatin, subfamily a, member 1 | Transcription regulator activity                        | Nucleus               | Transcription regulatory protein    | Regulation of nucleobase, nucleoside, nucleotide and nucleic acid metabolism | DEXDc;HELIC;SANT            | Yes                      |
| DNAJB14     | 79982   | dnaJ homolog subfamily B member 14 isoform 1                                | NP_001026893.1    | 2          | 1                 | 1          | 4      | 0.64                                                     | 1.05                                                     | 10.7                                                                                   | 32.28                                                                                  | 9.7                                                                                           | 51.1                                                                                          | 2                                                                              | 2                                                                              | 7013    | 79982          | None                                                                                             | Chaperone activity                                      | -                     | Chaperone                           | Protein metabolism;Protein folding                                           | DNAJ                        | Yes                      |
| UBE2N       | 7334    | ubiquitin-conjugating enzyme E2 N                                           | NP_003339.1       | 2          | 7                 | 7          | 24     | 0.64                                                     | 1.05                                                     | 17.59                                                                                  | 9.55                                                                                   | 42.1                                                                                          | 37.5                                                                                          | 13                                                                             | 13                                                                             | 4725    | 7334           | ubiquitin-conjugating enzyme E2N (UBC13)homolog (yeast)                                          | Ubiquitin-specific protease activity                    | Nucleus               | Ubiquitin proteasome system protein | Protein metabolism                                                           | UBC                         | Yes                      |
| ZAK         | 51776   | mitogen-activated protein kinase kinase kinase MLT isoform 1                | NP_057737.2       | 1          | 1                 | 4          | 7      | 0.64                                                     | 1.03                                                     |                                                                                        |                                                                                        |                                                                                               |                                                                                               | 1                                                                              | 1                                                                              |         |                |                                                                                                  |                                                         |                       |                                     |                                                                              |                             |                          |
| EXD2        | 55218   | exonuclease 3'-5' domain-containing protein 2 isoform 1                     | NP_001180289.1    | 2          | 1                 | 1          | 2      | 0.64                                                     | 0.99                                                     |                                                                                        |                                                                                        |                                                                                               |                                                                                               | 1                                                                              | 1                                                                              | 16592   | 55218          | chromosome 14 open reading frame 114                                                             | Exonuclease activity                                    | -                     | DNA exonuclease                     | Regulation of nucleobase, nucleoside, nucleotide and nucleic acid metabolism | 35EXO                       | Yes                      |
| DOCK6       | 57572   | dedicator of cytokinesis protein 6                                          | NP_065863.2       | 1          | 4                 | 4          | 11     | 0.64                                                     | 0.91                                                     | 18.25                                                                                  | 15.97                                                                                  | 23.9                                                                                          | 29.8                                                                                          | 4                                                                              | 4                                                                              | 13243   | 57572          | dedicator of cytokinesis 6                                                                       | Guanyl-nucleotide exchange factor activity              | -                     | Guanine nucleotide exchange factor  | Cell communication;Signal transduction                                       | -                           | Yes                      |
| ITGB1       | 3688    | integrin beta-1 isoform 1A precursor                                        | NP_002202.2       | 2          | 23                | 23         | 129    | 0.64                                                     | 0.79                                                     | 7.03                                                                                   | 6.28                                                                                   | 38.5                                                                                          | 42.3                                                                                          | 67                                                                             | 67                                                                             | 628     | 3688           | integrin, beta 1 (fibronectin receptor, betapolyprotein, antigen CD29 includes MDF2, MSK12)      | Receptor activity                                       | Plasma membrane       | Cell surface receptor               | Cell communication;Immune cell migration                                     | PSEVVA;TM;SP;INTB           | Yes                      |

Supplementary Table S1. List of quantified proteins in OKF6/TERT1-Smoke cells  
 Raigonalan *et al.*, 2017. Role of protein kinase N2 (PKN2) in cigarette smoke-mediated oncogenic transformation of oral cells

| Gene Symbol | Gene ID | Protein Description                                                            | Protein Accession | # Proteins | # Unique Peptides | # Peptides | # PSMs | OKF6/TERT1-Smoke/<br>OKF6/TERT1-Parental<br>(130/126) R1 | OKF6/TERT1-Smoke/<br>OKF6/TERT1-Parental<br>(128/127) R2 | Ratio Standard Errors [%]:<br>OKF6/TERT1-Smoke/<br>OKF6/TERT1-Parental<br>(130/126) R1 | Ratio Standard Errors [%]:<br>OKF6/TERT1-Smoke/<br>OKF6/TERT1-Parental<br>(128/127) R2 | Ratio Variabilities [%]:<br>F13: OKF6/TERT1-<br>Smoke/<br>OKF6/TERT1-Parental<br>(130/126) R1 | Ratio Variabilities [%]:<br>F13: OKF6/TERT1-<br>Smoke/<br>OKF6/TERT1-Parental<br>(128/127) R2 | Ratio Counts: F13:<br>OKF6/TERT1-Smoke/<br>OKF6/TERT1-Parental<br>(130/126) R1 | Ratio Counts: F13:<br>OKF6/TERT1-Smoke/<br>OKF6/TERT1-Parental<br>(128/127) R2 | HPRD ID | Entrez Gene ID | Gene Name                                                                                   | Molecular Function                       | Primary Localization | Molecular Class                  | Biological Process                                               | Domains                   | Plasma Proteome Database |  |
|-------------|---------|--------------------------------------------------------------------------------|-------------------|------------|-------------------|------------|--------|----------------------------------------------------------|----------------------------------------------------------|----------------------------------------------------------------------------------------|----------------------------------------------------------------------------------------|-----------------------------------------------------------------------------------------------|-----------------------------------------------------------------------------------------------|--------------------------------------------------------------------------------|--------------------------------------------------------------------------------|---------|----------------|---------------------------------------------------------------------------------------------|------------------------------------------|----------------------|----------------------------------|------------------------------------------------------------------|---------------------------|--------------------------|--|
| SLC25A5     | 292     | ADP/ATP translocase 2                                                          | NP_001143.2       | 2          | 5                 | 14         | 167    | 0.64                                                     | 0.77                                                     | 6.7                                                                                    | 9.73                                                                                   | 19.5                                                                                          | 34.4                                                                                          | 20                                                                             | 20                                                                             | 2147    | 292            | solute carrier family 25 (mitochondrial carrier, adenine nucleotide translocator), member 5 | ATP binding                              | Mitochondrion        | Integral membrane protein        | Metabolism;Energy pathways                                       | TM                        | Yes                      |  |
| HEBP2       | 23593   | heme-binding protein 2                                                         | NP_055135.1       | 1          | 3                 | 3          | 9      | 0.64                                                     | 0.7                                                      | 14.41                                                                                  | 28.61                                                                                  | 20.8                                                                                          | 47.4                                                                                          | 5                                                                              | 5                                                                              | 9316    | 23593          | heme binding protein 2                                                                      | Molecular function unknown               | Cytoplasm            | Unclassified                     | Biological_process unknown                                       | -                         | No                       |  |
| EPPK1       | 83481   | epiplakin                                                                      | NP_112598.3       | 1          | 21                | 28         | 74     | 0.64                                                     | 0.69                                                     | 10.94                                                                                  | 6.82                                                                                   | 38.3                                                                                          | 25.4                                                                                          | 28                                                                             | 28                                                                             | 6500    | 83481          | epiplakin 1                                                                                 | Cytoskeletal protein binding             | Cytoplasm            | Cytoskeletal associated protein  | Cell growth and/or maintenance                                   | PLEC                      | Yes                      |  |
| CA3         | 761     | carbonic anhydrase 3                                                           | NP_005172.1       | 1          | 1                 | 1          | 2      | 0.64                                                     | 0.69                                                     |                                                                                        |                                                                                        |                                                                                               |                                                                                               | 1                                                                              | 1                                                                              | 260     | 761            | carbonic anhydrase III, muscle specific                                                     | Catalytic activity                       | Cytoplasm            | Enzyme: Carbonic anhydrase       | Metabolism;Energy pathways                                       | -                         | Yes                      |  |
| SF3B4       | 10262   | splicing factor 3B subunit 4                                                   | NP_005841.1       | 1          | 1                 | 1          | 4      | 0.63                                                     | 1.7                                                      | 8.65                                                                                   | 5.79                                                                                   | 7.7                                                                                           | 14                                                                                            | 2                                                                              | 2                                                                              | 12028   | 10262          | splicing factor 3b subunit 4, 49kDa                                                         | Ribonucleoprotein                        | Nucleus              | RNA binding protein              | Regulation of nucleobase, nucleotide and nucleic acid metabolism | RRM                       | Yes                      |  |
| NUBP1       | 4682    | cytosolic Fe-S cluster assembly factor NUBP1 isoform 1                         | NP_002475.2       | 2          | 3                 | 3          | 5      | 0.63                                                     | 1.47                                                     | 60.89                                                                                  | 11.03                                                                                  | 58.7                                                                                          | 23.2                                                                                          | 2                                                                              | 2                                                                              | 2611    | 4682           | nucleotide binding protein 1 (Mtd homolog, E.coli)                                          | DNA binding                              | Nucleus              | DNA binding protein              | Regulation of nucleobase, nucleotide and nucleic acid metabolism | AAA                       | No                       |  |
| STON2       | 85439   | stonin-2 isoform 2                                                             | NP_001243359.1    | 2          | 4                 | 4          | 10     | 0.63                                                     | 1.41                                                     | 7                                                                                      | 33.9                                                                                   | 10.9                                                                                          | 171.5                                                                                         | 6                                                                              | 6                                                                              | 10531   | 85439          | None                                                                                        | Molecular function unknown               | Plasma membrane      | Unclassified                     | Biological_process unknown                                       | -                         | Yes                      |  |
| MED18       | 54797   | mediator of RNA polymerase II transcription subunit 18                         | NP_060108.2       | 1          | 1                 | 1          | 1      | 0.63                                                     | 1.26                                                     |                                                                                        |                                                                                        |                                                                                               |                                                                                               | 1                                                                              | 1                                                                              | 17476   | 54797          | mediator of RNA polymerase II transcription, subunit 18 homolog (yeast)                     | Transcription regulator activity         | -                    | Transcription regulatory protein | Regulation of nucleobase, nucleotide and nucleic acid metabolism | -                         | No                       |  |
| SNAPIN      | 23557   | SNARE-associated protein Snapin                                                | NP_036569.1       | 1          | 1                 | 1          | 2      | 0.63                                                     | 1.15                                                     |                                                                                        |                                                                                        |                                                                                               |                                                                                               | 1                                                                              | 1                                                                              | 6111    | 23557          | SNAP-associated protein                                                                     | Auxiliary transport protein activity     | Cytoplasm            | Membrane transport protein       | Transport                                                        | CC                        | Yes                      |  |
| PDPR        | 55066   | pyruvate dehydrogenase phosphatase regulatory subunit, mitochondrial precursor | NP_060460.4       | 1          | 3                 | 3          | 11     | 0.63                                                     | 1.12                                                     | 16.68                                                                                  | 3.49                                                                                   | 23.9                                                                                          | 8.7                                                                                           | 5                                                                              | 5                                                                              |         |                |                                                                                             |                                          |                      |                                  |                                                                  |                           |                          |  |
| OSBPL10     | 114884  | oxysterol-binding protein-related protein 10 isoform 1                         | NP_060254.2       | 2          | 3                 | 4          | 7      | 0.63                                                     | 0.88                                                     | 23.44                                                                                  | 25.25                                                                                  | 21.1                                                                                          | 32.3                                                                                          | 2                                                                              | 2                                                                              | 9480    | 114884         | oxysterol binding protein-like 10                                                           | Transporter activity                     | Cytoplasm            | Transport/cargo protein          | Transport                                                        | PH                        | Yes                      |  |
| ACOT13      | 55856   | acyl-coenzyme A thioesterase 13 isoform 1                                      | NP_060943.1       | 2          | 3                 | 3          | 11     | 0.63                                                     | 0.87                                                     | 1.05                                                                                   | 5.4                                                                                    | 1.5                                                                                           | 10.6                                                                                          | 5                                                                              | 5                                                                              | 7158    | 55856          | thioesterase superfamily member 2                                                           | Hydrolase activity                       | -                    | Enzyme: Hydrolase                | Metabolism;Energy pathways                                       | -                         | No                       |  |
| OAS1        | 4938    | 2'-5'-oligoadenylate synthase 1 isoform 3                                      | NP_001027581.1    | 3          | 3                 | 3          | 5      | 0.63                                                     | 0.85                                                     | 16.55                                                                                  | 25.17                                                                                  | 14.9                                                                                          | 31                                                                                            | 2                                                                              | 2                                                                              | 8879    | 4938           | 2',5'-oligoadenylate synthetase 1, 40/46kDa                                                 | Ligase activity                          | Cytoplasm            | Enzyme: Ligase                   | Immune response                                                  | -                         | Yes                      |  |
| VRK2        | 7444    | serine/threonine-protein kinase VRK2 isoform 1                                 | NP_001123953.1    | 4          | 1                 | 1          | 2      | 0.63                                                     | 0.84                                                     |                                                                                        |                                                                                        |                                                                                               |                                                                                               | 1                                                                              | 1                                                                              | 3702    | 7444           | vaccinia related kinase 2                                                                   | Protein serine/threonine kinase activity | Nucleus              | Serine/threonine kinase          | Regulation of nucleobase, nucleotide and nucleic acid metabolism | S_T_Kinase;TMS_T_Y_Kinase | Yes                      |  |
| MMS19       | 64210   | MMS19 nucleotide excision repair protein homolog isoform 1                     | NP_071757.4       | 3          | 5                 | 5          | 16     | 0.63                                                     | 0.83                                                     | 16.21                                                                                  | 29.86                                                                                  | 25.6                                                                                          | 66.7                                                                                          | 6                                                                              | 6                                                                              | 17579   | 64210          | MMS19-like (MET18 homolog, S. cerevisiae)                                                   | Transcription regulator activity         | Nucleus              | Transcription regulatory protein | Regulation of nucleobase, nucleotide and nucleic acid metabolism | -                         | No                       |  |
| CNTN1       | 1272    | contactin-1 isoform 1 precursor                                                | NP_001834.2       | 2          | 1                 | 1          | 2      | 0.63                                                     | 0.79                                                     | 4.84                                                                                   | 30.74                                                                                  | 4.4                                                                                           | 35.4                                                                                          | 2                                                                              | 2                                                                              | 7189    | 1272           | contactin 1                                                                                 | Cell adhesion molecule activity          | Plasma membrane      | Adhesion molecule                | Cell growth and/or maintenance                                   | IGC2;FN3;SP1g_LIKE        | Yes                      |  |
| USMG5       | 84833   | up-regulated during skeletal muscle growth protein 5                           | NP_116136.1       | 1          | 3                 | 3          | 6      | 0.63                                                     | 0.73                                                     |                                                                                        |                                                                                        |                                                                                               |                                                                                               | 1                                                                              | 1                                                                              | 18277   | 84833          | upregulated during skeletal muscle growth 5                                                 | Molecular function unknown               | Integral to membrane | Integral membrane protein        | Biological_process unknown                                       | TM                        | Yes                      |  |
| NMI         | 9111    | N-myc-interactor                                                               | NP_004679.2       | 1          | 3                 | 3          | 4      | 0.63                                                     | 0.73                                                     | 48.25                                                                                  | 4.57                                                                                   | 45.2                                                                                          | 4.7                                                                                           | 2                                                                              | 2                                                                              | 4632    | 9111           | N-myc (and STAT) interactor                                                                 | Transcription factor activity            | Cytoplasm            | Transcription factor             | Regulation of nucleobase, nucleotide and nucleic acid metabolism | CC                        | Yes                      |  |
| SPPL2A      | 84888   | signal peptide peptidase-like 2A precursor                                     | NP_116191.2       | 1          | 2                 | 2          | 3      | 0.63                                                     | 0.7                                                      |                                                                                        |                                                                                        |                                                                                               |                                                                                               | 1                                                                              | 1                                                                              |         |                |                                                                                             |                                          |                      |                                  |                                                                  |                           |                          |  |
| GALE        | 2582    | UDP-glucose 4-epimerase                                                        | NP_001121093.1    | 1          | 14                | 14         | 46     | 0.63                                                     | 0.69                                                     | 15.91                                                                                  | 13.38                                                                                  | 44.8                                                                                          | 40.4                                                                                          | 18                                                                             | 18                                                                             | 6092    | 2582           | UDP-galactose-4-epimerase                                                                   | Racemase and epimerase activity          | -                    | Enzyme: Epimerase                | Metabolism                                                       | -                         | No                       |  |
| DECR1       | 1666    | 2,4-dienoyl-CoA reductase, mitochondrial precursor                             | NP_001350.1       | 1          | 7                 | 7          | 31     | 0.63                                                     | 0.64                                                     | 16.38                                                                                  | 17.6                                                                                   | 43.2                                                                                          | 47.5                                                                                          | 16                                                                             | 16                                                                             | 1959    | 1666           | 2,4-dienoyl CoA reductase 1, mitochondrial                                                  | Catalytic activity                       | Mitochondrion        | Enzyme: Reductase                | Metabolism;Energy pathways                                       | -                         | Yes                      |  |
| WDR81       | 124997  | WD repeat-containing protein 81 isoform 1                                      | NP_001157281.1    | 1          | 2                 | 2          | 5      | 0.63                                                     | 0.64                                                     | 69.07                                                                                  | 23.19                                                                                  | 67.8                                                                                          | 21.2                                                                                          | 2                                                                              | 2                                                                              | 8748    | 124997         | None                                                                                        | Molecular function unknown               | -                    | Unclassified                     | Cell communication;Signal transduction                           | WD40                      | No                       |  |
| SPG11       | 80208   | spatacsin isoform 1                                                            | NP_079413.3       | 2          | 1                 | 1          | 2      | 0.63                                                     | 0.62                                                     |                                                                                        |                                                                                        |                                                                                               |                                                                                               | 1                                                                              | 1                                                                              | 7963    | 80208          | None                                                                                        | Molecular function unknown               | Cytosol              | Unclassified                     | Biological_process unknown                                       | CC                        | Yes                      |  |
| PYGB        | 5834    | glycogen phosphorylase, brain form                                             | NP_002853.2       | 1          | 33                | 34         | 135    | 0.63                                                     | 0.59                                                     | 12.41                                                                                  | 10.37                                                                                  | 63.7                                                                                          | 47.5                                                                                          | 55                                                                             | 55                                                                             | 720     | 5834           | phosphorylase, glycogen, brain                                                              | Phosphorylase activity                   | Cytoplasm            | Enzyme: Phosphorylase            | Metabolism;Energy pathways                                       | -                         | Yes                      |  |
| DDX19B      | 11269   | ATP-dependent RNA helicase DDX19B isoform 1                                    | NP_009173.1       | 5          | 1                 | 15         | 47     | 0.62                                                     | 1.82                                                     | 49.93                                                                                  | 23.18                                                                                  | 58                                                                                            | 83.9                                                                                          | 3                                                                              | 3                                                                              | 5781    | 11269          | DEAD (Asp-Glu-Ala-As) box polypeptide 19                                                    | ATPase activity                          | Cytoplasm;Nucleus    | ATPase                           | Metabolism                                                       | DEXDc;HELIC               | Yes                      |  |
| TBC1D24     | 57465   | TBC1 domain family member 24 isoform 1                                         | NP_001186036.1    | 2          | 1                 | 1          | 2      | 0.62                                                     | 1.31                                                     |                                                                                        |                                                                                        |                                                                                               |                                                                                               | 1                                                                              | 1                                                                              | 18938   | 57465          | TBC1 domain family, member 24                                                               | Molecular function unknown               | -                    | Unclassified                     | Cell-cell signaling                                              | TBC                       | No                       |  |
| MTRF1       | 9650    | mitochondrial fission regulator 1 isoform 3                                    | NP_001139311.1    | 3          | 1                 | 1          | 2      | 0.62                                                     | 1.12                                                     |                                                                                        |                                                                                        |                                                                                               |                                                                                               | 1                                                                              | 1                                                                              | 12389   | 9650           | None                                                                                        | Molecular function unknown               | Mitochondrion        | Unclassified                     | Biological_process unknown                                       | -                         | Yes                      |  |
| ANXA8       | 653145  | annexin A8 isoform 2                                                           | NP_001035173.1    | 4          | 2                 | 23         | 121    | 0.62                                                     | 1.1                                                      | 20.26                                                                                  | 11.75                                                                                  | 43.2                                                                                          | 44.9                                                                                          | 11                                                                             | 11                                                                             | 18906   | 653145         | annexin A8-like 1                                                                           | Calcium ion binding                      | -                    | Calcium binding protein          | Signal transduction                                              | ANX                       | Yes                      |  |
| DCTD        | 1635    | deoxycytidylate deaminase isoform a                                            | NP_001012750.1    | 2          | 1                 | 1          | 2      | 0.62                                                     | 1                                                        |                                                                                        |                                                                                        |                                                                                               |                                                                                               | 1                                                                              | 1                                                                              | 9623    | 1635           | dCMP deaminase                                                                              | Deaminase activity                       | -                    | Enzyme: Deaminase                | Metabolism;Energy pathways                                       | -                         | No                       |  |

Supplementary Table S1. List of quantified proteins in OKF6/TERT1-Smoke cells  
 Raigopaln *et al.*, 2017. Role of protein kinase N2 (PKN2) in cigarette smoke-mediated oncogenic transformation of oral cells

| Gene Symbol | Gene ID | Protein Description                                                | Protein Accession | # Proteins | # Unique Peptides | # Peptides | # PSMs | OKF6/TERT1-Smoke/<br>OKF6/TERT1-Parental<br>(130/126) R1 | OKF6/TERT1-Smoke/<br>OKF6/TERT1-Parental<br>(128/127) R2 | Ratio Standard Errors [%]:<br>OKF6/TERT1-Smoke/<br>OKF6/TERT1-Parental<br>(130/126) R1 | Ratio Standard Errors [%]:<br>OKF6/TERT1-Smoke/<br>OKF6/TERT1-Parental<br>(128/127) R2 | Ratio Variabilities [%]:<br>F13: OKF6/TERT1-<br>Smoke/<br>OKF6/TERT1-Parental<br>(130/126) R1 | Ratio Variabilities [%]:<br>F13: OKF6/TERT1-<br>Smoke/<br>OKF6/TERT1-Parental<br>(128/127) R2 | Ratio Counts: F13:<br>OKF6/TERT1-Smoke/<br>OKF6/TERT1-Parental<br>(130/126) R1 | Ratio Counts: F13:<br>OKF6/TERT1-Smoke/<br>OKF6/TERT1-Parental<br>(128/127) R2 | HPRD ID | Entrez Gene Id | Gene Name                                                                     | Molecular Function                                           | Primary Localization  | Molecular Class                 | Biological Process                                               | Domains            | Plasma Proteome Database |  |
|-------------|---------|--------------------------------------------------------------------|-------------------|------------|-------------------|------------|--------|----------------------------------------------------------|----------------------------------------------------------|----------------------------------------------------------------------------------------|----------------------------------------------------------------------------------------|-----------------------------------------------------------------------------------------------|-----------------------------------------------------------------------------------------------|--------------------------------------------------------------------------------|--------------------------------------------------------------------------------|---------|----------------|-------------------------------------------------------------------------------|--------------------------------------------------------------|-----------------------|---------------------------------|------------------------------------------------------------------|--------------------|--------------------------|--|
| VPS28       | 51160   | vacuolar protein sorting-associated protein 28 homolog isoform 2   | NP_898880.1       | 2          | 1                 | 1          | 2      | 0.62                                                     | 0.95                                                     |                                                                                        |                                                                                        |                                                                                               |                                                                                               | 1                                                                              |                                                                                | 11675   | 51160          | vacuolar protein sorting 28 (yeast)                                           | Transporter activity                                         | Cytoplasm             | Transport/cargo protein         | Transport                                                        | -                  | Yes                      |  |
| PHF3        | 23469   | PHD finger protein 3 isoform 1                                     | NP_055968.1       | 2          | 1                 | 1          | 2      | 0.62                                                     | 0.92                                                     |                                                                                        |                                                                                        |                                                                                               |                                                                                               | 1                                                                              | 1                                                                              | 8477    | 23469          | PHD finger protein 3                                                          | Transcription factor activity                                | Nucleus               | Transcription factor            | Regulation of nucleobase, nucleotide and nucleic acid metabolism | PHD;NLS            | Yes                      |  |
| ERAP2       | 64167   | endoplasmic reticulum aminopeptidase 2                             | NP_071745.1       | 1          | 7                 | 7          | 17     | 0.62                                                     | 0.9                                                      | 12.24                                                                                  | 16.95                                                                                  | 21.9                                                                                          | 45.1                                                                                          | 8                                                                              | 8                                                                              | 14306   | 64167          | None                                                                          | Aminopeptidase activity                                      | Endoplasmic reticulum | Aminopeptidase                  | Protein metabolism                                               | -                  | Yes                      |  |
| SSBP1       | 6742    | single-stranded DNA-binding protein, mitochondrial precursor       | NP_001243439.1    | 1          | 3                 | 3          | 10     | 0.62                                                     | 0.82                                                     | 24.96                                                                                  | 16.92                                                                                  | 35.6                                                                                          | 31.9                                                                                          | 5                                                                              | 5                                                                              | 2703    | 6742           | single-stranded DNA binding protein 1                                         | DNA binding                                                  | Mitochondrion         | DNA binding protein             | Regulation of nucleobase, nucleotide and nucleic acid metabolism | -                  | Yes                      |  |
| UQCRCB      | 7381    | cytochrome b-c1 complex subunit 7 isoform 3                        | NP_001241681.1    | 3          | 1                 | 1          | 2      | 0.62                                                     | 0.8                                                      |                                                                                        |                                                                                        |                                                                                               |                                                                                               | 1                                                                              | 1                                                                              | 11770   | 7381           | ubiquinol-cytochrome c reductase binding protein                              | Catalytic activity                                           | Mitochondrion         | Enzyme: Reductase               | Metabolism;Energy pathways                                       | -                  | Yes                      |  |
| HLA-B       | 3106    | major histocompatibility complex, class I, B precursor             | NP_005505.2       | 1          | 3                 | 6          | 24     | 0.62                                                     | 0.79                                                     | 33.71                                                                                  | 6.39                                                                                   | 44                                                                                            | 11.3                                                                                          | 4                                                                              | 5                                                                              | 828     | 3106           | major histocompatibility complex, class I, B                                  | MHC class I receptor activity;MHC class II receptor activity | Plasma membrane       | MHC complex protein             | Immune response                                                  | SP;IGC;TM          | Yes                      |  |
| HEXB        | 3074    | beta-hexosaminidase subunit beta isoform 1 preproprotein           | NP_000512.1       | 2          | 9                 | 10         | 22     | 0.62                                                     | 0.79                                                     | 14.25                                                                                  | 7.53                                                                                   | 30                                                                                            | 19.8                                                                                          | 11                                                                             | 11                                                                             | 6043    | 3074           | hexosaminidase B (beta polypeptide)                                           | Hydrolase activity                                           | Lysosome              | Enzyme: Hydrolase               | Metabolism;Energy pathways                                       | SP                 | Yes                      |  |
| PPP1R13B    | 23368   | apoptosis-stimulating of p53 protein 1                             | NP_056131.2       | 1          | 1                 | 1          | 2      | 0.62                                                     | 0.77                                                     |                                                                                        |                                                                                        |                                                                                               |                                                                                               | 1                                                                              | 1                                                                              | 7345    | 23368          | protein phosphatase 1, regulatory (inhibitor) subunit 13B                     | Protein binding                                              | Cytoplasm             | Regulatory/other subunit        | Apoptosis                                                        | CC;ANK;SH3         | Yes                      |  |
| TMBIM6      | 7009    | bax inhibitor 1 isoform 2                                          | NP_001092046.1    | 2          | 2                 | 2          | 4      | 0.62                                                     | 0.73                                                     | 19.94                                                                                  | 12.38                                                                                  | 17.5                                                                                          | 12.8                                                                                          | 2                                                                              | 2                                                                              | 2851    | 7009           | testis-enhanced gene transcript (BAX inhibitor)                               | Molecular function unknown                                   | Integral to membrane  | Integral membrane protein       | Apoptosis                                                        | TM                 | Yes                      |  |
| NFU1        | 27247   | NFU1 iron-sulfur cluster scaffold homolog, mitochondrial isoform 2 | NP_001002755.1    | 2          | 1                 | 1          | 3      | 0.61                                                     | 1.9                                                      |                                                                                        |                                                                                        |                                                                                               |                                                                                               | 1                                                                              | 1                                                                              | 12163   | 27247          | HIRA interacting protein 5                                                    | Molecular function unknown                                   | Mitochondrion;Cyto    | Unclassified                    | Biological process unknown                                       | -                  | Yes                      |  |
| DCAF11      | 80344   | DDI1- and CUL4-associated factor 11 isoform 1                      | NP_079506.3       | 2          | 1                 | 1          | 1      | 0.61                                                     | 1.76                                                     |                                                                                        |                                                                                        |                                                                                               |                                                                                               | 1                                                                              | 1                                                                              | 18297   | 80344          | WD repeat domain 23                                                           | Molecular function unknown                                   | -                     | Unclassified                    | Biological process unknown                                       | WD40               | Yes                      |  |
| NUDT2       | 318     | bis(5'-nucleosyl)-tetraphosphatase [asymmetrical]                  | NP_001152.1       | 1          | 2                 | 2          | 3      | 0.61                                                     | 1.55                                                     |                                                                                        |                                                                                        |                                                                                               |                                                                                               | 1                                                                              | 1                                                                              | 4168    | 318            | ndix (nucleoside diphosphate linked moietyX)-type motif 2                     | Hydrolase activity                                           | Cytoplasm             | Enzyme: Hydrolase               | Metabolism                                                       | -                  | Yes                      |  |
| CCDC109B    | 55013   | calcium uniporter regulatory subunit MCUb, mitochondrial           | NP_060388.2       | 1          | 1                 | 1          | 2      | 0.61                                                     | 1.48                                                     |                                                                                        |                                                                                        |                                                                                               |                                                                                               | 1                                                                              | 1                                                                              | 7939    | 55013          | None                                                                          | Molecular function unknown                                   | Plasma membrane       | Unclassified                    | Biological process unknown                                       | TM;CC              | No                       |  |
| CFDP1       | 10428   | craniofacial development protein 1                                 | NP_006315.1       | 1          | 2                 | 2          | 3      | 0.61                                                     | 1.38                                                     |                                                                                        |                                                                                        |                                                                                               |                                                                                               | 1                                                                              | 1                                                                              | 16282   | 10428          | craniofacial development protein 1                                            | Molecular function unknown                                   | Cytoplasm             | Unclassified                    | Cell growth and/or maintenance                                   | -                  | No                       |  |
| MRPS28      | 28957   | 28S ribosomal protein S28, mitochondrial                           | NP_054737.1       | 1          | 1                 | 1          | 6      | 0.61                                                     | 1.36                                                     | 10.49                                                                                  | 19.17                                                                                  | 11                                                                                            | 47.6                                                                                          | 3                                                                              | 3                                                                              | 10097   | 28957          | mitochondrial ribosomal protein S28                                           | Structural constituent of ribosome                           | Ribosome              | Ribosomal subunit               | Protein metabolism                                               | S1                 | No                       |  |
| JAGN1       | 84522   | protein jagunal homolog 1                                          | NP_115881.3       | 1          | 2                 | 2          | 6      | 0.61                                                     | 1.34                                                     | 14.47                                                                                  | 33.61                                                                                  | 15.3                                                                                          | 91.8                                                                                          | 3                                                                              | 3                                                                              | 13749   | 84522          | jagunal homolog 1 (Drosophila)                                                | Molecular function unknown                                   | -                     | Integral membrane protein       | Biological process unknown                                       | TM                 | No                       |  |
| COX20       | 116228  | cytochrome c oxidase protein 20 homolog                            | NP_932342.1       | 1          | 1                 | 1          | 5      | 0.61                                                     | 1.2                                                      | 20.75                                                                                  | 8.5                                                                                    | 22.1                                                                                          | 17.8                                                                                          | 3                                                                              | 3                                                                              |         |                |                                                                               |                                                              |                       |                                 |                                                                  |                    |                          |  |
| MTCH1       | 23787   | mitochondrial carrier homolog 1 PSAP-LL                            | NP_001258570.1    | 2          | 1                 | 1          | 3      | 0.61                                                     | 1.11                                                     |                                                                                        |                                                                                        |                                                                                               |                                                                                               | 1                                                                              | 1                                                                              | 14787   | 23787          | mitochondrial carrier homolog 1 (C. elegans)                                  | Caspase activator activity                                   | Mitochondrion         | Unclassified                    | Apoptosis                                                        | TM                 | No                       |  |
| TMOD1       | 7111    | tropomodulin-1                                                     | NP_003266.1       | 1          | 1                 | 2          | 6      | 0.61                                                     | 1                                                        | 60.47                                                                                  | 4.59                                                                                   | 55.8                                                                                          | 6.5                                                                                           | 2                                                                              | 2                                                                              | 1838    | 7111           | topomodulin 1                                                                 | Cytoskeletal protein binding                                 | Cytoplasm             | Cytoskeletal associated protein | Cell growth and/or maintenance                                   | CC                 | Yes                      |  |
| SCFD2       | 152579  | sec1 family domain-containing protein 2                            | NP_689753.2       | 1          | 2                 | 2          | 5      | 0.61                                                     | 0.98                                                     | 13.34                                                                                  | 17.12                                                                                  | 11.6                                                                                          | 24                                                                                            | 2                                                                              | 2                                                                              | 15300   | 152579         | sec1 family domain containing 2                                               | Transporter activity                                         | -                     | Transport/cargo protein         | Transport                                                        | -                  | Yes                      |  |
| PRKAB2      | 5565    | 5'-AMP-activated protein kinase subunit beta-2                     | NP_005390.1       | 2          | 1                 | 1          | 1      | 0.61                                                     | 0.93                                                     |                                                                                        |                                                                                        |                                                                                               |                                                                                               | 1                                                                              | 1                                                                              | 4117    | 5565           | protein kinase, AMP-activated, beta 2non-catalytic subunit                    | Molecular function unknown                                   | Cytoplasm             | Regulatory/other subunit        | Cell communication;Signal transduction                           | -                  | Yes                      |  |
| MAEA        | 10296   | macrophage erythroblast attacher isoform 1                         | NP_001017405.1    | 6          | 3                 | 3          | 4      | 0.61                                                     | 0.88                                                     | 54.38                                                                                  | 32.38                                                                                  | 62.9                                                                                          | 52.6                                                                                          | 3                                                                              | 3                                                                              | 8427    | 10296          | macrophage erythroblast attacher                                              | Cell adhesion molecule activity                              | Plasma membrane       | Adhesion molecule               | Cell adhesion                                                    | CTLH;TM;LISH       | No                       |  |
| SPINT1      | 6692    | kunitz-type protease inhibitor 1 isoform 2 precursor               | NP_003701.1       | 2          | 5                 | 5          | 7      | 0.61                                                     | 0.85                                                     | 22.19                                                                                  | 0.35                                                                                   | 27.7                                                                                          | 0.6                                                                                           | 4                                                                              | 4                                                                              | 5494    | 6692           | serine protease inhibitor, Kunitz type 1                                      | Protease inhibitor activity                                  | Membrane fraction     | Protease inhibitor              | Protein metabolism                                               | SP;KUNITZ;LDL;A;TM | Yes                      |  |
| PLS3        | 5358    | plastin-3 isoform 1                                                | NP_005023.2       | 4          | 21                | 27         | 95     | 0.61                                                     | 0.77                                                     | 8.64                                                                                   | 16.31                                                                                  | 32.7                                                                                          | 88.8                                                                                          | 37                                                                             | 37                                                                             | 2133    | 5358           | plastin 3 (T isoform)                                                         | Structural molecule activity                                 | Cytoplasm             | Structural protein              | Cell growth and/or maintenance                                   | EF;CH              | Yes                      |  |
| TNS4        | 84951   | tensin-4 precursor                                                 | NP_116254.4       | 1          | 6                 | 6          | 9      | 0.61                                                     | 0.74                                                     | 7.78                                                                                   | 11.94                                                                                  | 11.7                                                                                          | 21.9                                                                                          | 6                                                                              | 6                                                                              | 12223   | 84951          | tensin 4                                                                      | Molecular function unknown                                   | Plasma membrane       | Unclassified                    | Cell communication;Signal transduction                           | SP;SH2             | No                       |  |
| NAV1        | 89796   | neuron navigator 1 isoform 1                                       | NP_065176.3       | 2          | 6                 | 6          | 7      | 0.61                                                     | 0.72                                                     | 33.1                                                                                   | 29.29                                                                                  | 47.4                                                                                          | 49.8                                                                                          | 5                                                                              | 5                                                                              | 10113   | 89796          | neuron navigator 1                                                            | Molecular function unknown                                   | Nucleus               | Unclassified                    | Biological process unknown                                       | CC;AAA             | No                       |  |
| HSP61       | 3336    | 10 kDa heat shock protein, mitochondrial                           | NP_002148.1       | 1          | 4                 | 5          | 10     | 0.61                                                     | 0.72                                                     | 8.09                                                                                   | 14.14                                                                                  | 12.1                                                                                          | 25.5                                                                                          | 6                                                                              | 6                                                                              | 2535    | 3336           | heat shock 10kDa protein 1 (chaperonin 10)                                    | Heat shock protein activity                                  | Mitochondrion         | Heat shock protein              | Protein metabolism                                               | -                  | Yes                      |  |
| SLC1A4      | 6509    | neutral amino acid transporter A isoform 1                         | NP_003029.2       | 2          | 1                 | 1          | 2      | 0.61                                                     | 0.7                                                      |                                                                                        |                                                                                        |                                                                                               |                                                                                               | 1                                                                              | 1                                                                              | 2576    | 6509           | solute carrier family 1 (glutamate/neutral amino acid transporters), member 4 | Transporter activity                                         | Plasma membrane       | Transport/cargo protein         | Transport                                                        | TM                 | Yes                      |  |
| CYP2S1      | 29785   | cytochrome P450 2S1 precursor                                      | NP_085125.1       | 1          | 2                 | 2          | 7      | 0.61                                                     | 0.69                                                     | 33.48                                                                                  | 54.8                                                                                   | 36.5                                                                                          | 72.9                                                                                          | 3                                                                              | 3                                                                              | 7481    | 29785          | cytochrome P450, family 2, subfamily 5, polypeptide 1                         | Catalytic activity                                           | Endoplasmic reticulum | Enzyme: Oxygenase               | Metabolism;Energy pathways                                       | SP;TM              | Yes                      |  |
| SFXN3       | 81855   | sideroflexin-3                                                     | NP_112233.2       | 1          | 9                 | 11         | 33     | 0.61                                                     | 0.68                                                     | 13.03                                                                                  | 9.93                                                                                   | 30.3                                                                                          | 25.6                                                                                          | 14                                                                             | 14                                                                             | 15329   | 81855          | sideroflexin 3                                                                | Molecular function unknown                                   | Integral to membrane  | Integral membrane protein       | Biological process unknown                                       | TM                 | Yes                      |  |

Supplementary Table S1. List of quantified proteins in OKF6/TERT1-Smoke cells  
 Raingopaln *et al.*, 2017. Role of protein kinase N2 (PKN2) in cigarette smoke-mediated oncogenic transformation of oral cells

| Gene Symbol | Gene ID | Protein Description                                               | Protein Accession | # Proteins | # Unique Peptides | # Peptides | # PSMs | OKF6/TERT1-Smoke/<br>OKF6/TERT1-Parental<br>(130/126) R1 | OKF6/TERT1-Smoke/<br>OKF6/TERT1-Parental<br>(128/127) R2 | Ratio Standard Errors [%]:<br>OKF6/TERT1-Smoke/<br>OKF6/TERT1-Parental<br>(130/126) R1 | Ratio Standard Errors [%]:<br>OKF6/TERT1-Smoke/<br>OKF6/TERT1-Parental<br>(128/127) R2 | Ratio Variabilities [%]:<br>F13: OKF6/TERT1-<br>Smoke/<br>OKF6/TERT1-Parental<br>(130/126) R1 | Ratio Variabilities [%]:<br>F13: OKF6/TERT1-<br>Smoke/<br>OKF6/TERT1-Parental<br>(128/127) R2 | Ratio Counts: F13:<br>OKF6/TERT1-Smoke/<br>OKF6/TERT1-Parental<br>(130/126) R1 | Ratio Counts: F13:<br>OKF6/TERT1-Smoke/<br>OKF6/TERT1-Parental<br>(128/127) R2 | HPRD ID | Entrez Gene Id | Gene Name                                                                                    | Molecular Function                                                      | Primary Localization | Molecular Class                  | Biological Process                                                           | Domains            | Plasma Proteome Database |
|-------------|---------|-------------------------------------------------------------------|-------------------|------------|-------------------|------------|--------|----------------------------------------------------------|----------------------------------------------------------|----------------------------------------------------------------------------------------|----------------------------------------------------------------------------------------|-----------------------------------------------------------------------------------------------|-----------------------------------------------------------------------------------------------|--------------------------------------------------------------------------------|--------------------------------------------------------------------------------|---------|----------------|----------------------------------------------------------------------------------------------|-------------------------------------------------------------------------|----------------------|----------------------------------|------------------------------------------------------------------------------|--------------------|--------------------------|
| NDUFC2      | 4718    | NADH dehydrogenase [ubiquinone] subunit C2 isoform 1              | NP_004540.1       | 2          | 1                 | 1          | 1      | 0.61                                                     | 0.68                                                     |                                                                                        |                                                                                        |                                                                                               |                                                                                               | 1                                                                              | 1                                                                              | 11960   | 4718           | NADH dehydrogenase (ubiquinone) 1, subcomplex subunit 2, 14-5kDa                             | Oxidoreductase activity                                                 | Mitochondrion        | Enzyme: Oxidoreductase           | Metabolism;Energy pathways                                                   | TM                 | Yes                      |
| SERPIN5     | 5268    | serpin B5                                                         | NP_002630.2       | 1          | 26                | 26         | 165    | 0.61                                                     | 0.58                                                     | 5.95                                                                                   | 6.63                                                                                   | 32.6                                                                                          | 34.9                                                                                          | 78                                                                             | 78                                                                             | 11111   | 5268           | serpin (or cysteine) proteinase inhibitor, clade B (ovalbumin), member 5                     | Protease inhibitor activity                                             | Cytoplasm            | Protease inhibitor               | Protein metabolism                                                           | SERPIN             | Yes                      |
| GJB3        | 2707    | gap junction beta-3 protein                                       | NP_076872.1       | 1          | 1                 | 1          | 2      | 0.6                                                      | 1.29                                                     |                                                                                        |                                                                                        |                                                                                               |                                                                                               | 1                                                                              | 1                                                                              | 4505    | 2707           | gap junction protein, beta 3, 31kDa (connexin31)                                             | Auxiliary transport protein activity                                    | Plasma membrane      | Membrane transport protein       | Transport;Cell communication                                                 | TM                 | No                       |
| PLEKHA1     | 59338   | pleckstrin homology domain-containing family A member 1 isoform 1 | NP_001001974.1    | 2          | 1                 | 1          | 2      | 0.6                                                      | 0.81                                                     |                                                                                        |                                                                                        |                                                                                               |                                                                                               | 1                                                                              | 1                                                                              | 9686    | 59338          | pleckstrin homology domain-containing, family A (phosphoinositide binding specific) member 1 | Receptor signaling complex scaffold activity;Signal transducer activity | Cytoplasm            | Adapter molecule                 | Cell communication;Signal transduction                                       | PH                 | Yes                      |
| LMNA        | 4000    | lamin isoform A                                                   | NP_733821.1       | 6          | 56                | 59         | 262    | 0.6                                                      | 0.78                                                     | 5.32                                                                                   | 3.88                                                                                   | 39.5                                                                                          | 37.1                                                                                          | 143                                                                            | 141                                                                            | 1035    | 4000           | lamin A/C                                                                                    | Structural molecule activity                                            | Nucleus;Cytoplasm    | Structural protein               | Cell growth and/or maintenance                                               | CC;NLS             | Yes                      |
| CAV1        | 857     | caveolin-1 isoform alpha                                          | NP_001744.2       | 3          | 9                 | 9          | 32     | 0.6                                                      | 0.77                                                     | 16.47                                                                                  | 14.85                                                                                  | 42.7                                                                                          | 50.1                                                                                          | 17                                                                             | 17                                                                             | 3028    | 857            | caveolin 1, caveolar protein, 22kDa                                                          | Structural molecule activity                                            | Plasma membrane      | Structural protein               | Cell growth and/or maintenance                                               | TM                 | Yes                      |
| BACH1       | 571     | transcription regulator protein BACH1                             | NP_001177.1       | 1          | 1                 | 1          | 2      | 0.6                                                      | 0.76                                                     |                                                                                        |                                                                                        |                                                                                               |                                                                                               | 1                                                                              | 1                                                                              | 4127    | 571            | BTB and CNC homology 1, basic leucine zipper transcription factor 1                          | Transcription regulator activity                                        | Nucleus              | Transcription regulatory protein | Regulation of nucleobase, nucleoside, nucleotide and nucleic acid metabolism | BTB;BRLZ;CC        | Yes                      |
| GBP1        | 2633    | interferon-induced guanylate-binding protein 1                    | NP_002044.2       | 3          | 13                | 13         | 26     | 0.6                                                      | 0.52                                                     | 8.74                                                                                   | 16.64                                                                                  | 21.1                                                                                          | 35.9                                                                                          | 16                                                                             | 16                                                                             | 2681    | 2633           | guanylate binding protein 1, interferon-inducible, 67kDa                                     | GTPase activity                                                         | Cytoplasm            | GTPase                           | Cell communication;Signal transduction                                       | CC                 | Yes                      |
| EMILIN1     | 11117   | EMILIN-1 precursor                                                | NP_008977.1       | 1          | 1                 | 1          | 1      | 0.59                                                     | 1.36                                                     |                                                                                        |                                                                                        |                                                                                               |                                                                                               | 1                                                                              | 1                                                                              | 563     | 11117          | elastin microfibril interfacer 1                                                             | Extracellular matrix structural constituent                             | Extracellular        | Extracellular matrix protein     | Cell growth and/or maintenance                                               | SP;CC;COLL;C1Q     | Yes                      |
| HIST1HD1    | 3007    | histone H1.3                                                      | NP_005311.1       | 3          | 1                 | 10         | 70     | 0.59                                                     | 1.25                                                     | 1.46                                                                                   | 2.76                                                                                   | 1.2                                                                                           | 4.9                                                                                           | 2                                                                              | 2                                                                              | 6764    | 3007           | histone 1, H1d                                                                               | DNA binding                                                             | Nucleus              | DNA binding protein              | Regulation of nucleobase, nucleoside, nucleotide and nucleic acid metabolism | H15                | No                       |
| B2M         | 567     | beta-2-microglobulin precursor                                    | NP_004039.1       | 1          | 1                 | 1          | 1      | 0.59                                                     | 1.2                                                      |                                                                                        |                                                                                        |                                                                                               |                                                                                               | 1                                                                              | 1                                                                              | 189     | 567            | beta-2-microglobulin                                                                         | MHC class I receptor activity;MHC class II receptor activity            | Extracellular        | MHC complex protein              | Immune response                                                              | SP;IGC             | Yes                      |
| DIRC2       | 84925   | disrupted in renal carcinoma protein 2                            | NP_116228.1       | 1          | 1                 | 1          | 1      | 0.59                                                     | 1.17                                                     |                                                                                        |                                                                                        |                                                                                               |                                                                                               | 1                                                                              | 1                                                                              | 4142    | 84925          | disrupted in renal carcinoma 2                                                               | Auxiliary transport protein activity                                    | Plasma membrane      | Membrane transport protein       | Transport                                                                    | TM                 | No                       |
| IFI44       | 10561   | interferon-induced protein 44                                     | NP_006408.3       | 1          | 1                 | 1          | 2      | 0.59                                                     | 0.95                                                     |                                                                                        |                                                                                        |                                                                                               |                                                                                               | 1                                                                              | 1                                                                              | 9998    | 10561          | interferon-induced protein 44                                                                | Molecular function unknown                                              | Cytoplasm            | Unclassified                     | Biological process unknown                                                   | -                  | Yes                      |
| ZC2HC1A     | 51101   | zinc finger C2HC domain-containing protein 1A                     | NP_057094.2       | 1          | 1                 | 1          | 2      | 0.59                                                     | 0.91                                                     |                                                                                        |                                                                                        |                                                                                               |                                                                                               | 1                                                                              | 1                                                                              |         |                |                                                                                              |                                                                         |                      |                                  |                                                                              |                    |                          |
| STEAP3      | 55240   | metalloenductase STEAP3 isoform a                                 | NP_878919.2       | 2          | 2                 | 2          | 3      | 0.59                                                     | 0.9                                                      | 14.62                                                                                  | 2.1                                                                                    | 12.3                                                                                          | 2.7                                                                                           | 2                                                                              | 2                                                                              | 10285   | 55240          | None                                                                                         | Molecular function unknown                                              | Nucleus              | Cell cycle control protein       | Cell communication;Signal transduction                                       | TM                 | No                       |
| ENAH        | 55740   | protein enabled homolog isoform a                                 | NP_001008493.1    | 2          | 5                 | 5          | 13     | 0.59                                                     | 0.85                                                     | 26.57                                                                                  | 12.8                                                                                   | 35.9                                                                                          | 24.6                                                                                          | 5                                                                              | 5                                                                              | 12360   | 55740          | enabled homolog (Drosophila)                                                                 | Structural constituent of cytoskeleton                                  | Cytoplasm;Nucleus    | Cytoskeletal protein             | Cell growth and/or maintenance                                               | WH1;ERM;CC         | Yes                      |
| NDUFB7      | 4713    | NADH dehydrogenase [ubiquinone] 1 beta subcomplex subunit 7       | NP_004137.2       | 1          | 2                 | 2          | 3      | 0.59                                                     | 0.77                                                     | 23.69                                                                                  | 17.64                                                                                  | 20                                                                                            | 19.3                                                                                          | 2                                                                              | 2                                                                              | 11957   | 4713           | NADH dehydrogenase (ubiquinone) 1 beta subcomplex, 7, 18kDa                                  | Cell adhesion molecule activity                                         | Mitochondrion        | Adhesion molecule                | Metabolism;Energy pathways                                                   | CC                 | No                       |
| EXOC6B      | 23233   | exocyst complex component 6B                                      | NP_056004.1       | 1          | 6                 | 6          | 15     | 0.59                                                     | 0.68                                                     | 6.35                                                                                   | 20.37                                                                                  | 9.2                                                                                           | 35.1                                                                                          | 6                                                                              | 6                                                                              | 19418   | 23233          | exocyst complex component 6B                                                                 | Molecular function unknown                                              | -                    | Unclassified                     | Cell-cell signaling                                                          | CC                 | Yes                      |
| FPGT        | 8790    | fucose-1-phosphate guanylyltransferase isoform 1                  | NP_003829.3       | 2          | 1                 | 1          | 2      | 0.59                                                     | 0.66                                                     |                                                                                        |                                                                                        |                                                                                               |                                                                                               | 1                                                                              | 1                                                                              | 6790    | 8790           | fucose-1-phosphate guanylyltransferase                                                       | Phosphorylase activity                                                  | Cytoplasm            | Enzyme: Phosphorylase            | Metabolism;Energy pathways                                                   | -                  | Yes                      |
| ACTR1B      | 10120   | beta-actinin                                                      | NP_005726.1       | 1          | 2                 | 6          | 25     | 0.59                                                     | 0.57                                                     | 11.43                                                                                  | 31.67                                                                                  | 9.6                                                                                           | 25.8                                                                                          | 2                                                                              | 2                                                                              | 5508    | 10120          | ARPI actin-related protein 1 homolog B, actinin beta (yeast)                                 | Structural constituent of cytoskeleton                                  | Cytoplasm            | Cytoskeletal protein             | Cell growth and/or maintenance                                               | ACTIN              | Yes                      |
| COL6A2      | 1292    | collagen alpha-2(VI) chain isoform 2C2 precursor                  | NP_001840.3       | 3          | 1                 | 1          | 2      | 0.58                                                     | 1.1                                                      | 0.86                                                                                   | 7.06                                                                                   | 0.7                                                                                           | 11.1                                                                                          | 2                                                                              | 2                                                                              | 2110    | 1292           | collagen, type VI, alpha 2                                                                   | Extracellular matrix structural constituent                             | Extracellular        | Extracellular matrix protein     | Cell growth and/or maintenance                                               | SP;VWA;COLL        | Yes                      |
| CYP20A1     | 57404   | cytochrome P450 20A1                                              | NP_803882.1       | 1          | 1                 | 1          | 2      | 0.58                                                     | 0.97                                                     |                                                                                        |                                                                                        |                                                                                               |                                                                                               | 1                                                                              | 1                                                                              | 7100    | 57404          | cytochrome P450, family 20, subfamily A, polypeptide 1                                       | Catalytic activity                                                      | -                    | Enzyme: Oxygenase                | Metabolism;Energy pathways                                                   | TM;CC              | No                       |
| MIF         | 4282    | macrophage migration inhibitory factor                            | NP_002406.1       | 1          | 2                 | 2          | 7      | 0.58                                                     | 0.94                                                     | 4.76                                                                                   | 9.14                                                                                   | 3.9                                                                                           | 12.1                                                                                          | 2                                                                              | 2                                                                              | 1091    | 4282           | macrophage migration inhibitory factor (glycosylated, n-inhibiting factor)                   | Cytokine activity                                                       | Extracellular        | Cytokine                         | Cell communication;Signal transduction                                       | -                  | Yes                      |
| MSLN        | 10232   | mesothelin isoform 2 preproprotein                                | NP_037536.2       | 2          | 1                 | 1          | 1      | 0.58                                                     | 0.89                                                     |                                                                                        |                                                                                        |                                                                                               |                                                                                               | 1                                                                              | 1                                                                              | 3030    | 10232          | mesothelin                                                                                   | Cell adhesion molecule activity                                         | Membrane fraction    | Adhesion molecule                | Cell adhesion;Immune response                                                | SP                 | Yes                      |
| LAMB2       | 3913    | laminin subunit beta-2 precursor                                  | NP_002283.3       | 1          | 3                 | 3          | 10     | 0.58                                                     | 0.85                                                     | 27.43                                                                                  | 20.49                                                                                  | 40.6                                                                                          | 44.5                                                                                          | 6                                                                              | 6                                                                              | 1034    | 3913           | laminin, beta 2 (laminin 5)                                                                  | Extracellular matrix structural constituent                             | Extracellular        | Extracellular matrix protein     | Cell growth and/or maintenance                                               | EGFLAM;SP;CC;LAMNT | Yes                      |

Supplementary Table S1. List of quantified proteins in OKF6/TERT1-Smoke cells  
 Raigonalan *et al.*, 2017. Role of protein kinase N2 (PKN2) in cigarette smoke-mediated oncogenic transformation of oral cells

| Gene Symbol | Gene ID | Protein Description                                                              | Protein Accession | # Proteins | # Unique Peptides | # Peptides | # PSMs | OKF6/TERT1-Smoke/<br>OKF6/TERT1-Parental<br>(130/126) R1 | OKF6/TERT1-Smoke/<br>OKF6/TERT1-Parental<br>(128/127) R2 | Ratio Standard Errors [%]:<br>OKF6/TERT1-Smoke/<br>OKF6/TERT1-Parental<br>(130/126) R1 | Ratio Standard Errors [%]:<br>OKF6/TERT1-Smoke/<br>OKF6/TERT1-Parental<br>(128/127) R2 | Ratio Variabilities [%]:<br>F13: OKF6/TERT1-<br>Smoke/<br>OKF6/TERT1-Parental<br>(130/126) R1 | Ratio Variabilities [%]:<br>F13: OKF6/TERT1-<br>Smoke/<br>OKF6/TERT1-Parental<br>(128/127) R2 | Ratio Counts: F13:<br>OKF6/TERT1-Smoke/<br>OKF6/TERT1-Parental<br>(130/126) R1 | Ratio Counts: F13:<br>OKF6/TERT1-Smoke/<br>OKF6/TERT1-Parental<br>(128/127) R2 | HPRD ID | Entrez Gene Id | Gene Name                                                                             | Molecular Function                                        | Primary Localization   | Molecular Class                            | Biological Process                                                                           | Domains            | Plasma Proteome Database |
|-------------|---------|----------------------------------------------------------------------------------|-------------------|------------|-------------------|------------|--------|----------------------------------------------------------|----------------------------------------------------------|----------------------------------------------------------------------------------------|----------------------------------------------------------------------------------------|-----------------------------------------------------------------------------------------------|-----------------------------------------------------------------------------------------------|--------------------------------------------------------------------------------|--------------------------------------------------------------------------------|---------|----------------|---------------------------------------------------------------------------------------|-----------------------------------------------------------|------------------------|--------------------------------------------|----------------------------------------------------------------------------------------------|--------------------|--------------------------|
| SLC25A3     | 5250    | phosphate carrier protein, mitochondrial isoform b precursor                     | NP_998776.1       | 2          | 8                 | 8          | 28     | 0.58                                                     | 0.82                                                     | 20.29                                                                                  | 7.76                                                                                   | 48.1                                                                                          | 25.1                                                                                          | 15                                                                             | 15                                                                             | 2654    | 5250           | solute carrier family 25 (mitochondrial carrier; phosphate carrier), member 3         | Transporter activity                                      | Mitochondrial membrane | Transport/cargo protein                    | Transport                                                                                    | TM                 | Yes                      |
| P3H2        | 55214   | prolyl 3-hydroxylase 2 isoform a precursor                                       | NP_060662.2       | 2          | 1                 | 1          | 2      | 0.58                                                     | 0.75                                                     |                                                                                        |                                                                                        |                                                                                               |                                                                                               | 1                                                                              | 1                                                                              |         |                |                                                                                       |                                                           |                        |                                            |                                                                                              |                    |                          |
| BMP1        | 649     | bone morphogenetic protein 1 isoform 3 precursor                                 | NP_006120.1       | 2          | 1                 | 1          | 2      | 0.58                                                     | 0.66                                                     |                                                                                        |                                                                                        |                                                                                               |                                                                                               | 1                                                                              | 1                                                                              | 209     | 649            | bone morphogenetic protein 1                                                          | Metallopeptidase activity                                 | Extracellular;Nucleus  | Metallo protease                           | Protein metabolism                                                                           | CUB;EGFCA;SP;ZnMc  | Yes                      |
| IFI16       | 3428    | gamma-interferon-inducible protein 16 isoform 2                                  | NP_005522.2       | 8          | 26                | 26         | 78     | 0.58                                                     | 0.64                                                     | 8.34                                                                                   | 8.73                                                                                   | 30.9                                                                                          | 36.1                                                                                          | 39                                                                             | 39                                                                             | 969     | 3428           | interferon, gamma-inducible protein 16                                                | Transcription regulator activity                          | Nucleus                | Transcription regulatory protein           | Regulation of cell growth                                                                    | HIN                | Yes                      |
| CAMK2D      | 817     | calcium/calmodulin-dependent protein kinase type II subunit delta isoform 5      | NP_742112.1       | 15         | 5                 | 7          | 15     | 0.58                                                     | 0.56                                                     | 26.17                                                                                  | 18.55                                                                                  | 35.2                                                                                          | 23.7                                                                                          | 5                                                                              | 5                                                                              | 9653    | 817            | calcium/calmodulin-dependent protein kinase (CaMK kinase) II delta                    | Protein serine/threonine kinase activity                  | Cytoplasm              | Serine/threonine kinase                    | Regulation of cell growth                                                                    | S_T_kinase         | Yes                      |
| KIRREL3     | 84623   | kin of IRRE-like protein 3 isoform 1 precursor                                   | NP_115920.1       | 3          | 1                 | 1          | 1      | 0.58                                                     | 0.56                                                     |                                                                                        |                                                                                        |                                                                                               |                                                                                               | 1                                                                              | 1                                                                              | 9679    | 84623          | kin of IRRE-like 3 (Drosophila)                                                       | Antigen binding                                           | Extracellular          | Immunoglobulin                             | Cell communication;Signal transduction                                                       | SP;Ig_LIKE;IGC2-TM | Yes                      |
| S100A8      | 6279    | protein S100-A8                                                                  | NP_002955.2       | 1          | 6                 | 6          | 14     | 0.58                                                     | 0.55                                                     | 25.89                                                                                  | 14.84                                                                                  | 41.7                                                                                          | 21.9                                                                                          | 7                                                                              | 7                                                                              | 471     | 6279           | S100 calcium binding protein A8 (calgranulin A)                                       | Calcium ion binding                                       | Cytoplasm              | Calcium binding protein                    | Cell communication;Signal transduction                                                       | EF                 | Yes                      |
| CBX5        | 23468   | chromobox protein homolog 5                                                      | NP_036249.1       | 1          | 2                 | 2          | 3      | 0.58                                                     | 0.55                                                     | 13.99                                                                                  | 14.21                                                                                  | 11.6                                                                                          | 11.1                                                                                          | 2                                                                              | 2                                                                              | 5131    | 23468          | chromobox homolog 5 (HP1 alpha homolog;Drosophila)                                    | DNA binding                                               | Nucleus                | DNA binding protein                        | Regulation of nucleoside, nucleotide and nucleic acid metabolism                             | CHROMO             | No                       |
| PPL         | 5493    | periplakin                                                                       | NP_002696.3       | 1          | 28                | 28         | 55     | 0.58                                                     | 0.53                                                     | 9.84                                                                                   | 16.04                                                                                  | 33.2                                                                                          | 50.9                                                                                          | 32                                                                             | 32                                                                             | 4187    | 5493           | periplakin                                                                            | Structural constituent of cytoskeleton                    | Plasma membrane        | Cytoskeletal protein                       | Cell growth and/or maintenance                                                               | PLEC;CC;SPECTRIN   | Yes                      |
| TMEM192     | 201931  | transmembrane protein 192                                                        | NP_001093859.1    | 1          | 2                 | 2          | 3      | 0.58                                                     | 0.52                                                     | 22.93                                                                                  | 2.79                                                                                   | 18.9                                                                                          | 2.1                                                                                           | 2                                                                              | 2                                                                              | 8787    | 201931         | None                                                                                  | Molecular function unknown                                | Integral to membrane   | Integral membrane protein                  | Biological process unknown                                                                   | TM                 | No                       |
| SLC38A5     | 92745   | sodium-coupled neutral amino acid transporter 5                                  | NP_277053.2       | 1          | 1                 | 1          | 2      | 0.57                                                     | 1.67                                                     |                                                                                        |                                                                                        |                                                                                               |                                                                                               | 1                                                                              | 1                                                                              | 6718    | 92745          | solute carrier family 38, member 5                                                    | Transporter activity                                      | Plasma membrane        | Transport/cargo protein                    | Transport                                                                                    | TM                 | No                       |
| F3          | 2152    | tissue factor isoform 1 precursor                                                | NP_001984.1       | 2          | 1                 | 1          | 2      | 0.57                                                     | 1.49                                                     |                                                                                        |                                                                                        |                                                                                               |                                                                                               | 1                                                                              | 1                                                                              | 603     | 2152           | coagulation factor III (thromboplastin, tissue factor)                                | Cofactor binding                                          | Plasma membrane        | Coagulation factor                         | Protein metabolism                                                                           | SP;TM              | Yes                      |
| DTNBP1      | 84062   | dysbindin isoform a                                                              | NP_115498.2       | 4          | 1                 | 1          | 2      | 0.57                                                     | 1.35                                                     |                                                                                        |                                                                                        |                                                                                               |                                                                                               | 1                                                                              | 1                                                                              | 6190    | 84062          | dystrobrevin binding protein 1                                                        | Protein binding                                           | Cytoplasm              | Unclassified                               | Cell organization and biogenesis                                                             | CC                 | Yes                      |
| RMDN2       | 151393  | regulator of microtubule dynamics protein 2 isoform 1                            | NP_653314.3       | 3          | 1                 | 1          | 2      | 0.57                                                     | 1.22                                                     |                                                                                        |                                                                                        |                                                                                               |                                                                                               | 1                                                                              | 1                                                                              |         |                |                                                                                       |                                                           |                        |                                            |                                                                                              |                    |                          |
| EOGT        | 285203  | EGF domain-specific O-linked N-acetylglucosamine transferase isoform a precursor | NP_001265618.1    | 2          | 5                 | 5          | 8      | 0.57                                                     | 0.85                                                     | 14.9                                                                                   | 20.26                                                                                  | 14.7                                                                                          | 30.5                                                                                          | 3                                                                              | 3                                                                              |         |                |                                                                                       |                                                           |                        |                                            |                                                                                              |                    |                          |
| NDUFS5      | 4725    | NADH dehydrogenase [ubiquinone] iron-sulfur protein 5                            | NP_004543.1       | 1          | 1                 | 1          | 3      | 0.57                                                     | 0.68                                                     |                                                                                        |                                                                                        |                                                                                               |                                                                                               | 1                                                                              | 1                                                                              | 11961   | 4725           | NADH dehydrogenase (ubiquinone) Fe-S protein 5, 15kDa (NADH-coenzyme Q reductase)     | Oxidoreductase activity                                   | Mitochondrion          | Enzyme: Oxidoreductase                     | Metabolism;Energy pathways                                                                   | -                  | Yes                      |
| LYPD3       | 27076   | ly6/PLAUR domain-containing protein 3 precursor                                  | NP_055215.2       | 1          | 4                 | 4          | 6      | 0.57                                                     | 0.64                                                     | 18.05                                                                                  | 22.73                                                                                  | 20.7                                                                                          | 29.8                                                                                          | 4                                                                              | 4                                                                              | 10783   | 27076          | None                                                                                  | Molecular function unknown                                | -                      | Unclassified                               | Biological process unknown                                                                   | LU;SP              | Yes                      |
| TOR2A       | 27433   | proslusin isoform a precursor                                                    | NP_001078816.1    | 2          | 1                 | 1          | 2      | 0.57                                                     | 0.6                                                      |                                                                                        |                                                                                        |                                                                                               |                                                                                               | 1                                                                              | 1                                                                              | 16271   | 27433          | torin family 2, member A                                                              | Molecular function unknown                                | Extracellular          | Unclassified                               | Biological process unknown                                                                   | SP;TM              | No                       |
| TRPCAAP     | 26133   | short transient receptor potential channel 4-associated protein isoform a        | NP_056453.1       | 2          | 1                 | 1          | 4      | 0.56                                                     | 1.31                                                     |                                                                                        |                                                                                        |                                                                                               |                                                                                               | 1                                                                              | 1                                                                              | 9238    | 26133          | transient receptor potential cation channel, subfamily C, member 4 associated protein | Structural molecule activity;Peptide transporter activity | Cytoplasm              | Transport/cargo protein;Structural protein | Cell communication;Signal transduction;Antigen receptor-mediated signaling pathway;Transport | -                  | Yes                      |
| PCYOX1L     | 78991   | prenylcysteine oxidase-like isoform 1 precursor                                  | NP_076933.3       | 2          | 1                 | 1          | 3      | 0.56                                                     | 0.97                                                     |                                                                                        |                                                                                        |                                                                                               |                                                                                               | 1                                                                              | 1                                                                              | 14552   | 78991          | None                                                                                  | Molecular function unknown                                | -                      | Unclassified                               | Biological process unknown                                                                   | SP                 | No                       |
| MMAB        | 326625  | cob(lyminic acid a,c)-diamide adenosyltransferase, mitochondrial precursor       | NP_443077.1       | 1          | 2                 | 2          | 5      | 0.56                                                     | 0.74                                                     | 4.91                                                                                   | 3.27                                                                                   | 4.8                                                                                           | 4.2                                                                                           | 3                                                                              | 3                                                                              | 7398    | 326625         | methylmalonic aciduria (cobalamin deficiency) type B                                  | Catalytic activity                                        | Mitochondrion          | Enzyme: Adenosyltransferase                | Metabolism;Energy pathways                                                                   | -                  | Yes                      |
| PTGFRN      | 5738    | prostaglandin F2 receptor negative regulator precursor                           | NP_065173.2       | 1          | 14                | 14         | 26     | 0.56                                                     | 0.65                                                     | 8.91                                                                                   | 11.63                                                                                  | 18.2                                                                                          | 27.7                                                                                          | 13                                                                             | 13                                                                             | 3124    | 5738           | prostaglandin F2 receptor negative regulator                                          | Protein binding                                           | Golgi apparatus        | Integral membrane protein                  | Cell communication;Signal transduction                                                       | SP;IG;TM           | Yes                      |
| TRIM65      | 201292  | tripartite motif-containing protein 65 isoform 1                                 | NP_75818.2        | 2          | 1                 | 1          | 1      | 0.56                                                     | 0.58                                                     |                                                                                        |                                                                                        |                                                                                               |                                                                                               | 1                                                                              | 1                                                                              | 15569   | 201292         | tripartite motif-containing 65                                                        | Molecular function unknown                                | -                      | Unclassified                               | Biological process unknown                                                                   | RNG;BBOX;SPRY;CC   | No                       |
| RPS28       | 6234    | 40S ribosomal protein S28                                                        | NP_001022.1       | 1          | 2                 | 2          | 6      | 0.55                                                     | 1.34                                                     | 22.61                                                                                  | 4.82                                                                                   | 21.7                                                                                          | 11.3                                                                                          | 3                                                                              | 3                                                                              | 4731    | 6234           | ribosomal protein S28                                                                 | Structural constituent of ribosome                        | Ribosome               | Ribosomal subunit                          | Protein metabolism                                                                           | -                  | Yes                      |
| ZNF860      | 344787  | zinc finger protein 860                                                          | NP_001131146.2    | 1          | 1                 | 1          | 1      | 0.55                                                     | 1.19                                                     |                                                                                        |                                                                                        |                                                                                               |                                                                                               | 1                                                                              | 1                                                                              |         |                |                                                                                       |                                                           |                        |                                            |                                                                                              |                    |                          |
| TRAPPC8     | 22878   | trafficking protein particle complex subunit 8                                   | NP_055754.2       | 1          | 2                 | 2          | 5      | 0.55                                                     | 1.18                                                     | 8.52                                                                                   | 6.77                                                                                   | 8.1                                                                                           | 13.9                                                                                          | 3                                                                              | 3                                                                              |         |                |                                                                                       |                                                           |                        |                                            |                                                                                              |                    |                          |
| UBL7        | 84993   | ubiquitin-like protein 7 isoform b                                               | NP_001273670.1    | 2          | 1                 | 1          | 2      | 0.55                                                     | 0.99                                                     |                                                                                        |                                                                                        |                                                                                               |                                                                                               | 1                                                                              | 1                                                                              | 16556   | 84993          | ubiquitin-like 7 (base narrow stromal cell-derived)                                   | Ubiquitin-like-protein-specific protease activity         | -                      | Ubiquitin proteasome system protein        | Protein metabolism                                                                           | UBA                | Yes                      |
| ITGB5       | 3693    | integrin beta-5 precursor                                                        | NP_002204.2       | 1          | 2                 | 2          | 3      | 0.55                                                     | 0.98                                                     | 0.14                                                                                   | 43.2                                                                                   | 0.1                                                                                           | 65.7                                                                                          | 2                                                                              | 2                                                                              | 949     | 3693           | integrin, beta 5                                                                      | Cell adhesion molecule activity                           | Plasma membrane        | Adhesion molecule                          | Cell communication;Signal transduction                                                       | PSI;VWA;TM;SP      | Yes                      |

Supplementary Table S1. List of quantified proteins in OKF6/TERT1-Smoke cells  
 Raigopaln et al., 2017. Role of protein kinase N2 (PKN2) in cigarette smoke-mediated oncogenic transformation of oral cells

| Gene Symbol | Gene ID | Protein Description                                                   | Protein Accession | # Proteins | # Unique Peptides | # Peptides | # PSMs | OKF6/TERT1-Smoke/<br>OKF6/TERT1-Parental<br>(130/126) R1 | OKF6/TERT1-Smoke/<br>OKF6/TERT1-Parental<br>(128/127) R2 | Ratio Standard Errors [%]:<br>OKF6/TERT1-Smoke/<br>OKF6/TERT1-Parental<br>(130/126) R1 | Ratio Standard Errors [%]:<br>OKF6/TERT1-Smoke/<br>OKF6/TERT1-Parental<br>(128/127) R2 | Ratio Variabilities [%]:<br>F13: OKF6/TERT1-<br>Smoke/<br>OKF6/TERT1-Parental<br>(130/126) R1 | Ratio Variabilities [%]:<br>F13: OKF6/TERT1-<br>Smoke/<br>OKF6/TERT1-Parental<br>(128/127) R2 | Ratio Counts: F13:<br>OKF6/TERT1-Smoke/<br>OKF6/TERT1-Parental<br>(130/126) R1 | Ratio Counts: F13:<br>OKF6/TERT1-Smoke/<br>OKF6/TERT1-Parental<br>(128/127) R2 | HPRD ID | Entrez Gene ID | Gene Name                                                                     | Molecular Function                           | Primary Localization    | Molecular Class                         | Biological Process                                                           | Domains                           | Plasma Proteome Database |
|-------------|---------|-----------------------------------------------------------------------|-------------------|------------|-------------------|------------|--------|----------------------------------------------------------|----------------------------------------------------------|----------------------------------------------------------------------------------------|----------------------------------------------------------------------------------------|-----------------------------------------------------------------------------------------------|-----------------------------------------------------------------------------------------------|--------------------------------------------------------------------------------|--------------------------------------------------------------------------------|---------|----------------|-------------------------------------------------------------------------------|----------------------------------------------|-------------------------|-----------------------------------------|------------------------------------------------------------------------------|-----------------------------------|--------------------------|
| PROCR       | 10544   | endothelial protein C receptor precursor                              | NP_006395.2       | 1          | 2                 | 2          | 6      | 0.55                                                     | 0.8                                                      | 8.84                                                                                   | 14.49                                                                                  | 8.4                                                                                           | 20.2                                                                                          | 3                                                                              | 3                                                                              | 2801    | 10544          | protein C receptor, endothelial (EPCR)                                        | Antigen binding                              | Plasma membrane         | Immunoglobulin                          | Immune response                                                              | SP;TM                             | Yes                      |
| SFN         | 2810    | 14-3-3 protein sigma                                                  | NP_006133.1       | 1          | 16                | 19         | 205    | 0.55                                                     | 0.79                                                     | 14.29                                                                                  | 17.88                                                                                  | 80.2                                                                                          | 199.4                                                                                         | 81                                                                             | 81                                                                             | 3185    | 2810           | stratifyn                                                                     | Receptor signaling complex scaffold activity | Cytoplasm               | Adapter molecule                        | Cell communication;Signal transduction                                       | CC                                | Yes                      |
| CD109       | 135228  | CD109 antigen isoform 1 preproprotein                                 | NP_598000.2       | 3          | 14                | 14         | 31     | 0.55                                                     | 0.75                                                     | 15.54                                                                                  | 13.85                                                                                  | 34                                                                                            | 41.8                                                                                          | 15                                                                             | 15                                                                             | 10590   | 135228         | CD109 antigen (Gv9 platelet alloantigen)                                      | Molecular function unknown                   | Plasma membrane         | Unclassified                            | Immune response                                                              | A2M;SP;GPI                        | Yes                      |
| FLOT1       | 10211   | flotillin-1                                                           | NP_005794.1       | 1          | 8                 | 8          | 18     | 0.55                                                     | 0.61                                                     | 5.78                                                                                   | 27.04                                                                                  | 9.6                                                                                           | 52.6                                                                                          | 9                                                                              | 9                                                                              | 6105    | 10211          | flotillin 1                                                                   | Molecular function unknown                   | Plasma membrane         | Unclassified                            | Cell growth and/or maintenance                                               | PHB;CC                            | Yes                      |
| FKBP5       | 2289    | peptidyl-prolyl cis-trans isomerase FKBP5 isoform 1                   | NP_001139248.1    | 2          | 19                | 19         | 40     | 0.55                                                     | 0.52                                                     | 17.25                                                                                  | 16.11                                                                                  | 48.4                                                                                          | 42.1                                                                                          | 23                                                                             | 23                                                                             | 4019    | 2289           | FK506 binding protein 5                                                       | Isomerase activity                           | Cytoplasm               | Enzyme: Isomerase                       | Metabolism;Energy pathways                                                   | TPR                               | Yes                      |
| ZNFH2       | 741     | zinc finger HIT domain-containing protein 2                           | NP_055020.1       | 1          | 1                 | 1          | 2      | 0.54                                                     | 1.23                                                     |                                                                                        |                                                                                        |                                                                                               |                                                                                               | 1                                                                              | 1                                                                              | 5200    | 741            | zinc finger, HIT domain containing 2                                          | Molecular function unknown                   | Nucleus                 | Unclassified                            | Biological process unknown                                                   | -                                 | Yes                      |
| LYPLA2      | 11313   | acyl-protein thioesterase 2                                           | NP_009191.1       | 1          | 2                 | 2          | 2      | 0.54                                                     | 0.93                                                     |                                                                                        |                                                                                        |                                                                                               |                                                                                               | 1                                                                              | 1                                                                              | 7127    | 11313          | lysophospholipase II                                                          | Phospholipase activity                       | -                       | Enzyme: Phospholipase                   | Metabolism;Energy pathways                                                   | SP                                | No                       |
| DSCR3       | 10311   | Down syndrome critical region protein 3                               | NP_006043.1       | 1          | 2                 | 2          | 4      | 0.54                                                     | 0.77                                                     | 35.41                                                                                  | 7.35                                                                                   | 27.7                                                                                          | 8                                                                                             | 2                                                                              | 2                                                                              | 10390   | 10311          | Down syndrome critical region gene 3                                          | Molecular function unknown                   | -                       | Unclassified                            | Biological process unknown                                                   | -                                 | Yes                      |
| PLXNB1      | 5364    | plexin-B1 precursor                                                   | NP_002664.2       | 1          | 1                 | 1          | 1      | 0.54                                                     | 0.75                                                     |                                                                                        |                                                                                        |                                                                                               |                                                                                               | 1                                                                              | 1                                                                              | 3032    | 5364           | plexin B1                                                                     | Receptor activity                            | Plasma membrane         | Cell surface receptor                   | Cell communication;Signal transduction                                       | SEMA;PSLBP;CCSP                   | Yes                      |
| ADH1B       | 125     | alcohol dehydrogenase 1B isoform 1                                    | NP_000659.2       | 1          | 1                 | 1          | 3      | 0.54                                                     | 0.66                                                     | 26.32                                                                                  | 4.79                                                                                   | 20.3                                                                                          | 4.5                                                                                           | 2                                                                              | 2                                                                              | 65      | 125            | alcohol dehydrogenase 1B (class I), betapolypeptide                           | Catalytic activity                           | Mitochondrion           | Enzyme: Dehydrogenase                   | Metabolism;Energy pathways                                                   | -                                 | Yes                      |
| DGKA        | 1606    | diacylglycerol kinase alpha                                           | NP_001336.2       | 3          | 13                | 13         | 36     | 0.54                                                     | 0.57                                                     | 14.72                                                                                  | 14.37                                                                                  | 32.6                                                                                          | 33.6                                                                                          | 16                                                                             | 16                                                                             | 517     | 1606           | diacylglycerol kinase, alpha 80kDa                                            | Catalytic activity                           | Cytoplasm               | Enzyme: Phosphotransferase              | Cell communication;Signal transduction                                       | CL;DAGK;EF;DAGKA                  | Yes                      |
| TCAF1       | 9747    | protein FAM115A isoform 1                                             | NP_055534.1       | 3          | 1                 | 1          | 2      | 0.53                                                     | 1.31                                                     |                                                                                        |                                                                                        |                                                                                               |                                                                                               | 1                                                                              | 1                                                                              |         |                |                                                                               |                                              | -                       | Calcium binding protein                 | Signal transduction                                                          | ANX                               | No                       |
| ANKASL1     | 728113  | annexin A8-like protein 1 isoform 1                                   | NP_001092315.2    | 3          | 2                 | 23         | 105    | 0.53                                                     | 1.26                                                     | 20.18                                                                                  | 8.75                                                                                   | 21.8                                                                                          | 22.3                                                                                          | 4                                                                              | 4                                                                              | 19373   | 728113         | None                                                                          | Calcium ion binding                          | -                       | Calcium binding protein                 | Signal transduction                                                          | ANX                               | No                       |
| SNAP29      | 9342    | synaptosomal-associated protein 29                                    | NP_004773.1       | 1          | 1                 | 1          | 2      | 0.53                                                     | 0.73                                                     |                                                                                        |                                                                                        |                                                                                               |                                                                                               | 1                                                                              | 1                                                                              | 11968   | 9342           | synaptosomal-associated protein, 29kDa                                        | Auxiliary transport protein activity         | Plasma membrane         | Membrane transport protein              | Transport                                                                    | CSNARE                            | Yes                      |
| HIST1H3F    | 8968    | histone H3.1                                                          | NP_066298.1       | 4          | 3                 | 8          | 37     | 0.53                                                     | 0.71                                                     | 8.99                                                                                   | 14.96                                                                                  | 10.7                                                                                          | 24.1                                                                                          | 5                                                                              | 5                                                                              | 11910   | 8968           | histone 1, H3f                                                                | DNA binding                                  | Nucleus                 | DNA binding protein                     | Regulation of nucleobase, nucleoside, nucleotide and nucleic acid metabolism | -                                 | No                       |
| S100A16     | 140576  | protein S100-A16                                                      | NP_525127.1       | 1          | 5                 | 5          | 18     | 0.53                                                     | 0.65                                                     | 6.57                                                                                   | 26.2                                                                                   | 9.8                                                                                           | 50.9                                                                                          | 8                                                                              | 8                                                                              | 11529   | 140576         | S100 calcium binding protein A16                                              | Calcium ion binding                          | Nucleolus               | Calcium binding protein                 | Cell communication;Signal transduction                                       | EF                                | No                       |
| TNC         | 3371    | tenascin precursor                                                    | NP_002151.2       | 1          | 36                | 36         | 100    | 0.53                                                     | 0.61                                                     | 15.44                                                                                  | 8.04                                                                                   | 66.5                                                                                          | 37.3                                                                                          | 54                                                                             | 54                                                                             | 1756    | 3371           | tenascin C (hexabrachion)                                                     | Cell adhesion molecule activity              | Extracellular           | Adhesion molecule                       | Cell communication;Signal transduction                                       | EGF;FN3;FBG;RGD;SP                | Yes                      |
| S100A13     | 6284    | protein S100-A13                                                      | NP_005970.1       | 1          | 4                 | 4          | 9      | 0.53                                                     | 0.57                                                     | 13.6                                                                                   | 27.33                                                                                  | 17.9                                                                                          | 39.2                                                                                          | 6                                                                              | 6                                                                              | 3586    | 6284           | S100 calcium binding protein A13                                              | Calcium ion binding                          | Nucleus                 | Calcium binding protein                 | Cell communication;Signal transduction                                       | S_100                             | Yes                      |
| SUN1        | 23553   | SUN domain-containing protein 1 isoform a                             | NP_001124437.1    | 5          | 8                 | 9          | 19     | 0.53                                                     | 0.57                                                     | 17.69                                                                                  | 24                                                                                     | 25.1                                                                                          | 37.5                                                                                          | 7                                                                              | 7                                                                              | 16257   | 23553          | unc-84 homolog A (C. elegans)                                                 | Intracellular transporter activity           | Nucleus                 | Integral membrane protein               | Cell growth and/or maintenance                                               | TM;CC                             | Yes                      |
| CD14        | 929     | monocyte differentiation antigen CD14 precursor                       | NP_000582.1       | 1          | 4                 | 4          | 9      | 0.53                                                     | 0.57                                                     | 12.53                                                                                  | 12.48                                                                                  | 13.3                                                                                          | 14.3                                                                                          | 4                                                                              | 4                                                                              | 1151    | 929            | CD14 antigen                                                                  | Receptor activity                            | Cell surface            | Cell surface receptor                   | Immune response                                                              | LRR;SP                            | Yes                      |
| IFT1        | 3434    | interferon-induced protein with tetratricopeptide repeats 1 isoform 1 | NP_001539.3       | 4          | 18                | 19         | 41     | 0.53                                                     | 0.55                                                     | 11.4                                                                                   | 9.7                                                                                    | 28.3                                                                                          | 25                                                                                            | 21                                                                             | 21                                                                             | 983     | 3434           | interferon-induced protein with tetratricopeptide repeats 1                   | Nucleic acid binding;Protein binding         | Cytoplasm               | DNA binding protein;RNA binding protein | Biological process unknown                                                   | TPR                               | Yes                      |
| ITGAV       | 3685    | integrin alpha-V isoform 1 precursor                                  | NP_002201.1       | 3          | 26                | 26         | 63     | 0.53                                                     | 0.51                                                     | 13.14                                                                                  | 17.26                                                                                  | 42.6                                                                                          | 54.8                                                                                          | 34                                                                             | 34                                                                             | 1903    | 3685           | integrin, alpha V (vitronectin receptor, alphapolypeptide, antigen CD51)      | Receptor activity                            | Plasma membrane         | Cell surface receptor                   | Cell communication;Signal transduction;Cell adhesion                         | TM;INTA;SP                        | Yes                      |
| PYCARD      | 29108   | apoptosis-associated speck-like protein containing a CARD isoform a   | NP_037390.2       | 2          | 4                 | 4          | 12     | 0.52                                                     | 0.91                                                     | 36.62                                                                                  | 10.91                                                                                  | 49                                                                                            | 24.8                                                                                          | 6                                                                              | 6                                                                              | 6020    | 29108          | PYD and CARD domain containing                                                | Caspase activator activity                   | Cytoplasm               | Adapter molecule                        | Apoptosis                                                                    | CARD                              | No                       |
| NDOR1       | 27158   | NADPH-dependent flavin oxidoreductase 1 isoform a                     | NP_001137498.1    | 4          | 1                 | 1          | 2      | 0.52                                                     | 0.9                                                      |                                                                                        |                                                                                        |                                                                                               |                                                                                               | 1                                                                              | 1                                                                              | 10444   | 27158          | NADPH dependent flavin oxidoreductase 1                                       | Catalytic activity                           | Cytoplasm               | Enzyme: Reductase                       | Metabolism;Energy pathways                                                   | -                                 | No                       |
| C14orf1     | 11161   | probable ergosterol biosynthetic protein 28                           | NP_009107.1       | 1          | 2                 | 2          | 3      | 0.52                                                     | 0.73                                                     | 18.89                                                                                  | 16.67                                                                                  | 13.9                                                                                          | 17.4                                                                                          | 2                                                                              | 2                                                                              | 5201    | 11161          | chromosome 14 open reading frame 1                                            | Molecular function unknown                   | Plasma membrane         | Unclassified                            | Metabolism;Energy pathways                                                   | TM                                | Yes                      |
| NDUFA7      | 4701    | NADH dehydrogenase [ubiquinone] 1 alpha subcomplex subunit 7          | NP_004992.2       | 1          | 3                 | 3          | 4      | 0.52                                                     | 0.63                                                     | 20.01                                                                                  | 35.97                                                                                  | 18.2                                                                                          | 40.8                                                                                          | 3                                                                              | 3                                                                              | 11885   | 4701           | NADH dehydrogenase (ubiquinone) 1 alpha subcomplex, 7, 14.5kDa                | Molecular function unknown                   | Mitochondrion           | Unclassified                            | Metabolism;Energy pathways                                                   | -                                 | Yes                      |
| PPP1R14C    | 81706   | protein phosphatase 1 regulatory subunit 14C                          | NP_112211.1       | 1          | 3                 | 3          | 7      | 0.52                                                     | 0.59                                                     | 49.91                                                                                  | 24.63                                                                                  | 55.5                                                                                          | 29.5                                                                                          | 4                                                                              | 4                                                                              | 17890   | 81706          | protein phosphatase 1, regulatory (inhibitory) subunit 14C                    | Molecular function unknown                   | Integral to membrane    | Regulatory/other subunit                | Cell communication;Signal transduction                                       | -                                 | Yes                      |
| LIMA1       | 51474   | LIM domain and actin-binding protein 1 isoform 2                      | NP_057441.1       | 2          | 2                 | 38         | 104    | 0.51                                                     | 1.37                                                     | 13.77                                                                                  | 2.54                                                                                   | 12.2                                                                                          | 6                                                                                             | 3                                                                              | 3                                                                              | 9755    | 51474          | None                                                                          | Structural constituent of cytoskeleton       | Cytoplasm               | Cytoskeletal protein                    | Cell growth and/or maintenance                                               | LIM                               | Yes                      |
| CELSR1      | 9620    | cadherin EGF LAG seven-pass G-type receptor 1 precursor               | NP_055061.1       | 1          | 1                 | 1          | 1      | 0.51                                                     | 1.19                                                     |                                                                                        |                                                                                        |                                                                                               |                                                                                               | 1                                                                              | 1                                                                              | 5160    | 9620           | cadherin, EGF LAG seven-pass G-type receptor 1 (flamingo homolog, Drosophila) | G-protein coupled receptor activity          | Plasma membrane;Nucleus | G protein coupled receptor              | Cell communication;Signal transduction                                       | SP;Cathelin;EGF;L;LAMG;HRM;GPS;TM | Yes                      |
| LAMP2       | 3920    | lysosomal-associated membrane glycoprotein 2 isoform C precursor      | NP_001116078.1    | 3          | 1                 | 1          | 2      | 0.51                                                     | 1.08                                                     |                                                                                        |                                                                                        |                                                                                               |                                                                                               | 1                                                                              | 1                                                                              | 2396    | 3920           | lysosomal-associated membrane protein 2                                       | Cell adhesion molecule activity              | Lysosome                | Adhesion molecule                       | Cell growth and/or maintenance                                               | TM;SP                             | Yes                      |

Supplementary Table S1. List of quantified proteins in OKF6/TERT1-Smoke cells  
 Raingopalan *et al.*, 2017. Role of protein kinase N2 (PKN2) in cigarette smoke-mediated oncogenic transformation of oral cells

| Gene Symbol | Gene ID | Protein Description                                   | Protein Accession | # Proteins | # Unique Peptides | # Peptides | # PSMs | OKF6/TERT1-Smoke/<br>OKF6/TERT1-Parental<br>(130/126) R1 | OKF6/TERT1-Smoke/<br>OKF6/TERT1-Parental<br>(128/127) R2 | Ratio Standard Errors [%]:<br>OKF6/TERT1-Smoke/<br>OKF6/TERT1-Parental<br>(130/126) R1 | Ratio Standard Errors [%]:<br>OKF6/TERT1-Smoke/<br>OKF6/TERT1-Parental<br>(128/127) R2 | Ratio Variabilities [%]:<br>F13: OKF6/TERT1-<br>Smoke/<br>OKF6/TERT1-Parental<br>(130/126) R1 | Ratio Variabilities [%]:<br>F13: OKF6/TERT1-<br>Smoke/<br>OKF6/TERT1-Parental<br>(128/127) R2 | Ratio Counts: F13:<br>OKF6/TERT1-Smoke/<br>OKF6/TERT1-Parental<br>(130/126) R1 | Ratio Counts: F13:<br>OKF6/TERT1-Smoke/<br>OKF6/TERT1-Parental<br>(128/127) R2 | HPRD ID | Entrez Gene Id | Gene Name                                                                             | Molecular Function               | Primary Localization | Molecular Class                  | Biological Process                                               | Domains        | Plasma Proteome Database |
|-------------|---------|-------------------------------------------------------|-------------------|------------|-------------------|------------|--------|----------------------------------------------------------|----------------------------------------------------------|----------------------------------------------------------------------------------------|----------------------------------------------------------------------------------------|-----------------------------------------------------------------------------------------------|-----------------------------------------------------------------------------------------------|--------------------------------------------------------------------------------|--------------------------------------------------------------------------------|---------|----------------|---------------------------------------------------------------------------------------|----------------------------------|----------------------|----------------------------------|------------------------------------------------------------------|----------------|--------------------------|
| ANO6        | 196527  | anoctamin-6 isoform d                                 | NP_001191732.1    | 4          | 3                 | 3          | 6      | 0.51                                                     | 0.75                                                     | 22.31                                                                                  | 7.2                                                                                    | 19.9                                                                                          | 9.4                                                                                           | 3                                                                              | 3                                                                              | 18746   | 196527         | Transmembrane protein 16F                                                             | Molecular function unknown       | Integral to membrane | Integral membrane protein        | Biological processes unknown                                     | TM             | No                       |
| CROT        | 54677   | peroxisomal carnitine O-octanoyltransferase isoform 1 | NP_001137407.1    | 2          | 4                 | 4          | 9      | 0.51                                                     | 0.58                                                     | 30.63                                                                                  | 14.94                                                                                  | 31.9                                                                                          | 17.4                                                                                          | 4                                                                              | 4                                                                              | 12081   | 54677          | carnitine O-octanoyltransferase                                                       | Acyltransferase activity         | Peroxisome           | Enzyme: Acyltransferase          | Metabolism;Energy pathways                                       | -              | Yes                      |
| DSG3        | 1830    | desmoglein-3 preproprotein                            | NP_001935.2       | 1          | 16                | 16         | 38     | 0.51                                                     | 0.52                                                     | 11.49                                                                                  | 26.54                                                                                  | 25.4                                                                                          | 63.7                                                                                          | 18                                                                             | 18                                                                             | 1355    | 1830           | desmoglein 3 (pseudoglycosylated)                                                     | Cell adhesion molecule activity  | Plasma membrane      | Adhesion molecule                | Cell communication;Signal transduction                           | Cadherin,SP,TM | Yes                      |
| NFKBIE      | 4794    | NF-kappa-B inhibitor epsilon                          | NP_004547.2       | 1          | 1                 | 1          | 2      |                                                          | 1.78                                                     |                                                                                        |                                                                                        |                                                                                               |                                                                                               |                                                                                | 1                                                                              | 5181    | 4794           | nuclear factor of kappa light polypeptide gene enhancer in B cells inhibitor, epsilon | Transcription regulator activity | Nucleus              | Transcription regulatory protein | Regulation of nucleobase, nucleotide and nucleic acid metabolism | ANK            | Yes                      |
