# Supplementary material
Source: PubMed Central journal article supplement (PMC6235782)
Supplement: 12079_2017_442_MOESM2_ESM.pdf [file 12079_2017_442_MOESM2_ESM.pdf]

Supplementary Table S2. List of quantified phosphopeptides in OKF/ERT1-Smoke cells  
Rakamolanu et al., 2017. Role of protein kinase N1 (PKN1) in cigarette smoke-mediated oncogenic transformation of oral cells

Table with columns: NP\_Accession, Gene ID, Protein Accession, Gene Symbol, Protein Description, PhosphoSite (Protein), OKF/ERT1-Smoke/OKF/ERT1-Parental (126127.R1), OKF/ERT1-Smoke/OKF/ERT1-Parental (126127.R2), Peptide Sequence, # Protein Group, # Proteins, # PSMs, # Missed Cleavages, Modification, pIaaSB: Best Site Probabilities, pIaaSB: Phospho Site Probabilities, PhosphoSite (Protein), PhosphoSite (Protein), Confidence, Theo. M(D), Rate Standard Errors (%), Ratio OKF/ERT1-Smoke/OKF/ERT1-Parental (126127.R2), Ratio Standard Errors (%), Rate Variability (%), Rate Variability (%), Rate Counts: F4, Rate Counts: F4, Ion Score Maxout, Confidence Maxout, DeltaScore Maxout, XCorr Request HT, Confidence Request HT, DeltaScore Request HT, PhosphoSite/Plant



















Supplementary Table S2. List of quantified phosphoproteins in OKF6/ERT1-Smoke cells  
Rissmann et al., 2017. Role of genetic kinase in PKC $\alpha$  in nicotine smoke-mediated oncogenic transformation of oral cells

Table with 30 columns: NP, Accession, Gene ID, Protein Accession, Gene Symbol, Protein Description, PhosphoSite (Protein), OKF6/ERT1-Smoke/OKF6/ERT1-Parent (128127:R1), OKF6/ERT1-Smoke/OKF6/ERT1-Parent (128127:R2), Peptide Sequence, # Protein Groups, # Proteins, # PSMs, # Missed Cleavages, Modification, PSMs: Best Site Phospho, pSMs: Phospho Site Phospho, PhosphoIndex, PhosphoSite (Protein), Confidence, Theo. MW (kDa), Ratio Standard Error (%): OKF6/ERT1-Smoke/OKF6/ERT1-Parent (128127:R2), Ratio Standard Error (%): OKF6/ERT1-Smoke/OKF6/ERT1-Parent (128127:R2), Ratio Variability (%): F4: OKF6/ERT1-Smoke/OKF6/ERT1-Parent (128127:R1), Ratio Variability (%): F4: OKF6/ERT1-Smoke/OKF6/ERT1-Parent (128127:R2), Ratio Counts: F4: OKF6/ERT1-Smoke/OKF6/ERT1-Parent (128127:R1), Ratio Counts: F4: OKF6/ERT1-Smoke/OKF6/ERT1-Parent (128127:R2), Ion Score Maxcat, Confidence Maxcat, DeltaScore Maxcat, XCorr Request HT, Confidence Request HT, DeltaScore Request HT, PhosphoSite/Plant, Phospho



































































Supplemental Table S2. List of quantified phosphoproteins in OKP6/FERT1-Smoke cells

Table with 27 columns: NP\_Accession, Gene ID, Protein Accession, Gene Symbol, Protein Description, PhosphoSite (Protein), OKP6/FERT1-Parent (120127.R1), OKP6/FERT1-Parent (120127.R2), Peptide Sequence, # Protein Group, # Proteins, # PSMs, # Missed Cleavages, Modification, PSMs: Best Site, pSMs: Phospho Site Probabilities, PhosphoIndex, PhosphoSite (Protein), Confidence, Theo. MW (Da), Ratio Standard Errors (%): OKP6/FERT1-Smoke/OKP6/FERT1-Parent (120127.R2), Ratio Variability (%): F4: OKP6/FERT1-Smoke/OKP6/FERT1-Parent (120127.R1), Ratio Variability (%): F4: OKP6/FERT1-Smoke/OKP6/FERT1-Parent (120127.R2), Ratio Counts: F4: OKP6/FERT1-Smoke/OKP6/FERT1-Parent (120127.R2), Ratio Counts: F4: OKP6/FERT1-Parent/OKP6/FERT1-Parent (120127.R2), Ion Score Maxcut, Confidence Maxcut, DeltaScore Maxcut, XCorr Suggest HT, Confidence Suggest HT, DeltaScore Suggest HT, PhosphoSite/PLink evidence

Supplementary Table S2. List of quantified phosphoproteins in OKF/ERT1-Snake cells (PKAN). Role of genetic kinase N1 (PKAN) in genetic smoke-mediated oncogenic transformation of oral cells

Table with 28 columns: NP\_Accession, Gene ID, Protein Accession, Gene Symbol, Protein Description, PhosphoSite (Protein), OKF/ERT1-Snake/OKF/ERT1-Parental, OKF/ERT1-Snake/OKF/ERT1-Parental, Peptide Sequence, # Protein Group, # Proteins, # PSM, # Missed Cleavages, Modification, pmuBS\_ProteinSite, pmuBS\_ProteinSite, pmuBS\_ProteinSite, PhosphoSite, PhosphoSite, Confidence, Thm. MD, Rate Standard Error (%), Rate Standard Error (%), Rate Standard Error (%), Rate Variability (%), Rate Variability (%), Rate Variability (%), Rate Counts: F4, Rate Counts: F4, Rate Counts: F4, Rate Scores Macro, Confidence Macro, DeltaScore Macro, Xcore Sequo HT, Confidence Sequo HT, DeltaScore Sequo HT, PhosphoSite/Plant, Phospho.



























Supplementary Table S2. List of quantified phosphopeptides in OKF6/TERT1-Smoke cells  
 Bakeman et al., 2017. Role of serine kinase N1 (PKN1) in cigarette smoke-mediated oncogenic transformation of oral cells.

| NP_Accession   | Gene ID | Protein Accession | Gene Symbol | Protein Description                                                  | PhosphoSite (Protein) | OKF6/TERT1-Smoke/OKF6/TERT1-Parental (126126) R1 | OKF6/TERT1-Smoke/OKF6/TERT1-Parental (126127) R2 | Peptide Sequence          | # Protein Groups | # Proteins | # PSMs | # Missed Cleavages | Modifications                                                                                                        | pmoBS: Best Site Probabilities                                                    | pmoBS: Phospho Site Probabilities                                             | Phosphorandom               | PhosphoSite (Peptide) | Confidence | Thres. MH [Da] | Ratio Standard Error (%) OKF6/TERT1-Smoke/OKF6/TERT1-Parental (126126) R1 | Ratio Standard Error (%) OKF6/TERT1-Smoke/OKF6/TERT1-Parental (126127) R2 | Ratio Variability (%) F4: OKF6/TERT1-Smoke/OKF6/TERT1-Parental (126126) R1 | Ratio Variability (%) F4: OKF6/TERT1-Smoke/OKF6/TERT1-Parental (126127) R2 | Ratio Counts: F4: OKF6/TERT1-Smoke/OKF6/TERT1-Parental (126126) R1 | Ratio Counts: F4: OKF6/TERT1-Smoke/OKF6/TERT1-Parental (126127) R2 | Ion Score Mascot | Confidence Mascot | DeltaScore Mascot | XCorr Request HT | Confidence Request HT | DeltaScore Request HT | PhosphoSite/PLM: vidence |
|----------------|---------|-------------------|-------------|----------------------------------------------------------------------|-----------------------|--------------------------------------------------|--------------------------------------------------|---------------------------|------------------|------------|--------|--------------------|----------------------------------------------------------------------------------------------------------------------|-----------------------------------------------------------------------------------|-------------------------------------------------------------------------------|-----------------------------|-----------------------|------------|----------------|---------------------------------------------------------------------------|---------------------------------------------------------------------------|----------------------------------------------------------------------------|----------------------------------------------------------------------------|--------------------------------------------------------------------|--------------------------------------------------------------------|------------------|-------------------|-------------------|------------------|-----------------------|-----------------------|--------------------------|
| NP_056112.1    | 23349   | 149944593         | KIAA1045    | protein KIAA1045 [Homo sapiens]                                      | T47                   | 1.39                                             | 0.47                                             | RGVGVGSVQVEEER            | 1                | 1          | 1      | 1                  | 2*MTMplex (N-Term: K31); 2*Deamidated (Q9100); Q21000; 1*Phospho (T11000)                                            | T1(Phospho): 100; Q2(Deamidated): 100; Q1(Deamidated): 100                        | T(1): 100.0, S(7): 0.0                                                        | LPGRRRGVGVGSVQEE            | T1:                   | High       | 2215.089545    |                                                                           |                                                                           |                                                                            | 1                                                                          | 1                                                                  |                                                                    |                  |                   |                   | 2.870298147      | High                  | 0.1802                | No                       |
| NP_001242941.1 | 4628    | 365192532         | MYH10       | myosin 10 isoform 1 [Homo sapiens]                                   | S621                  | 2.65                                             | 0.68                                             | NMEPINDNVATLLHQSLD R      | 1                | 3          | 1      | 0                  | 1*MTMplex (N-Term: T1); 2*Deamidated (N11000); N61000; N81000; 1*Phospho (S12798.4)                                  | N1(Deamidated): 100; N6(Deamidated): 100; N8(Deamidated): 100; S12(Phospho): 96.4 | T(1): 0.0, S(16): 3.6, S(17): 96.5                                            | ATLHQSLDMEPINDNVATLLHQSLD R | S17:                  | High       | 2452.090906    |                                                                           |                                                                           |                                                                            | 1                                                                          | 1                                                                  |                                                                    |                  |                   |                   | 2.868131161      | High                  | 0.0139                | No                       |
| NP_068823.1    | 67532   | 32099730          | NUPF2       | nuclear single X-mutated interacting protein 2 [Homo sapiens]        | S396                  | 2.22                                             | 0.57                                             | KITTFNSGIALSLFPAHQEL QK   | 1                | 4          | 1      | 0                  | 1*MTMplex (N-Term: T1); 1*Phospho (S15108.R)                                                                         | S15(Phospho): 96.77                                                               | S(1): 0.1, T(1): 0.5, T(4): 0.1, S(5): 0.1, S(7): 0.1, S(11): 0.5, S(12): 0.8 | QALSLFPAHQELQK              | S15:                  | High       | 2752.30894     |                                                                           |                                                                           |                                                                            | 1                                                                          | 1                                                                  |                                                                    |                  |                   |                   | 2.859759569      | High                  |                       | No                       |
| NP_055733.2    | 22856   | 31842309          | CHRY1       | chromatin sulfate synthase 1 precursor [Homo sapiens]                | S56                   | 0.89                                             | 1.3                                              | SGQAAAQAGGARGIDAR         | 1                | 1          | 1      | 1                  | 1*MTMplex (N-Term: T1); 1*Deamidated (Q6009.7); 1*Phospho (S1799.R)                                                  | S17(Phospho): 99.83; Q6(Deamidated): 99.99                                        | S(1): 0.2, S(7): 99.8                                                         | RSQAAAQAGGARGIDAR           | S7:                   | High       | 1840.850034    |                                                                           |                                                                           |                                                                            | 1                                                                          | 1                                                                  |                                                                    |                  |                   |                   | 2.851205111      | High                  | 0.2246                | No                       |
| NP_114417.2    | 84034   | 60499978          | EMLN2       | EMLN2 precursor [Homo sapiens]                                       | S204; S209            | 1.79                                             | 0.84                                             | LRTVLRQSLAGVAVNL R        | 1                | 1          | 1      | 1                  | 2*MTMplex (N-Term: K20); 2*Phospho (S11096.3; S12100)                                                                | S11(Phospho): 96.27; S12(Phospho): 99.99                                          | T(2): 0.0, T(4): 0.0, S(10): 17.8, S(11): 96.3, S(16): 100.0                  | TVLRQSLAGVAVNLR             | S11; S16:             | High       | 2762.450649    |                                                                           |                                                                           |                                                                            | 1                                                                          | 1                                                                  |                                                                    |                  |                   |                   | 2.842374563      | High                  | 0.0317                | No/No                    |
| NP_060417.2    | 55034   | 157388923         | MOCOS       | methylmannan cofactor sulfatase [Homo sapiens]                       | T820                  | 0.09                                             |                                                  | QMKICDQEQQR               | 1                | 1          | 1      | 0                  | 1*MTMplex (N-Term: T1); 2*Carbamidomethyl (C1; C5); 1*Deamidated (M10100); 1*Deamidated (Q21000); 1*Phospho (T10100) | Q2(Deamidated): 100; M1(Deamidated): 100; T10(Phospho): 100                       | T(10): 100.0                                                                  | MICDQEQQRNQHV               | T10:                  | High       | 1963.82745     |                                                                           |                                                                           |                                                                            | 1                                                                          |                                                                    |                                                                    |                  |                   |                   | 2.834098116      | High                  | 0.2686                | No                       |
| NP_005553.2    | 3918    | 157419138         | LAMC2       | laminin subunit gamma-2 isoform a precursor [Homo sapiens]           | S756                  | 1.22                                             | 0.58                                             | LAQIATLARSDVESAS NMIEQTER | 1                | 2          | 1      | 1                  | 1*MTMplex (N-Term: T1); 1*Deamidated (N1909.7); 1*Phospho (S12096.7)                                                 | S12(Phospho): 96.68; N19(Deamidated): 100; N18(Deamidated): 100                   | S(1): 96.7, T(7): 3.3, S(12): 0.0, S(14): 0.0, S(18): 0.0, T(24): 0.0         | VQIPIKLAQIATLAR             | S1:                   | High       | 3068.455724    |                                                                           |                                                                           |                                                                            | 1                                                                          | 1                                                                  |                                                                    |                  |                   |                   | 2.83302474       | High                  | 0.0848                | No                       |
| NP_004565.1    | 5414    | 4758942           | Seg-04      | sepin 4 isoform 1 [Homo sapiens]                                     | S4; S11               | 2.09                                             | 0.2                                              | ALGWQGNVFEER              | 1                | 1          | 1      | 0                  | 1*MTMplex (N-Term: T1); 2*Deamidated (Q5400); N71000; 2*Phospho (S15100); S8100)                                     | S15(Phospho): 100; Q5(Deamidated): 100; N7(Deamidated): 100; S8(Phospho): 100     | S(1): 100.0, S(8): 100.0                                                      | MRGLWQGNVSLWQGNVFEERTE      | S1; S8:               | High       | 1835.745158    |                                                                           |                                                                           |                                                                            | 1                                                                          | 1                                                                  |                                                                    |                  |                   |                   | 2.824651957      | High                  | 0.2163                | No/No                    |
| NP_001158136.1 | 37549   | 257467648         | MAST4       | mitral-valve-associated protein-like 4 isoform 1 [Homo sapiens]      | S1467                 | 2.4                                              | 1.22                                             | KMLEVYQEEVQR              | 1                | 5          | 1      | 1                  | 2*MTMplex (N-Term: K1); 1*Phospho (S31000)                                                                           | S3(Phospho): 100                                                                  | S(3): 100.0, T(7): 0.0                                                        | HLCRRKMLEVYQEE              | S3:                   | High       | 2121.110554    |                                                                           |                                                                           |                                                                            | 1                                                                          | 1                                                                  |                                                                    |                  |                   |                   | 2.819285631      | High                  | 0.3511                | No                       |
| NP_056240.2    | 25885   | 103471997         | POB1A       | DNA-directed RNA polymerase 1 subunit BPA1 [Homo sapiens]            | T464                  | 0.64                                             | 0.16                                             | SVKPKDMVYNTNKGIPAV FAK    | 1                | 1          | 1      | 0                  | 1*MTMplex (N-Term: K1); 1*Carbamidomethyl (C4); 1*Deamidated (N1207.2); 1*Phospho (T22100)                           | N10(Deamidated): 50; N1(Deamidated): 50; T22(Phospho): 100                        | S(1): 0.0, Y(8): 0.0, T(11): 0.0, Y(23): 100.0                                | QIPAVFAKLYVQPK              | T22:                  | High       | 3152.55234     |                                                                           |                                                                           |                                                                            | 1                                                                          | 1                                                                  |                                                                    |                  |                   |                   | 2.81304431       | High                  | 0.0391                | No                       |
| NP_061940.1    | 54552   | 9506611           | GNL3L       | granule molecule-binding protein-like 3, like isoform [Homo sapiens] | S135                  | 0.26                                             | 0.7                                              | VVEYGVLEVLDAAR            | 1                | 1          | 1      | 0                  | 1*MTMplex (N-Term: T1); 1*Phospho (S1596.7)                                                                          | S15(Phospho): 96.7                                                                | Y(4): 3.3, S(5): 96.7                                                         | FRKVEYGVLEVLV               | S5:                   | High       | 2029.045605    |                                                                           |                                                                           |                                                                            | 1                                                                          | 1                                                                  |                                                                    |                  |                   |                   | 2.808324814      | High                  | 0.0285                | No                       |
